# Supplementary material for: Nucleophilic covalent ligand discovery for the cysteine redoxome
Source: Research Square preprint supplement (doi:10.21203/rs.3.rs-1765196/v1), 2022-06-23
Supplement: Supplementary file 1 [file 4efaa85c243de8940cc13f35.xlsx]

## Sheet: Legend
Supplementary Data 1. Quantitative chemoproteomic analysis of sulfenome reactivity in the human proteome. The protein lysates from A549 cells were labeled with 500 µM and 5 mM BTD, respectively, and subjected to tryptic digestion. The resulting BTD-modified peptides were further conjugated to light and heavy azido biotin reagents with a photocleavable linker (Az-UV-biotin), respectively, via copp…

## Sheet: Sulfenome  reactivity
Uniprot Accession #	Site	Genename	Genename_Site	Description	Modified sequences	Spectrum count	All ratio	All SD Ratio	R10:1	Ratio SD	Total spectrum count	Repeat counts	Function annotation
Q96C86	37	DCPS	DCPS_37	DCPS_HUMAN m7GpppX diphosphatase OS=Homo sapiens OX=9606 GN=DCPS PE=1 SV=2	||GVGNGTC(BTD[C])APVR|	||1|	||0.14|	||NA|	0.14	NA	1	1
P35580	1238	MYH10	MYH10_1238	MYH10_HUMAN Myosin-10 OS=Homo sapiens OX=9606 GN=MYH10 PE=1 SV=3	||ELAC(BTD[C])EVK|	||1|	||0.16|	||NA|	0.16	NA	1	1
O14744	196	PRMT5	PRMT5_196	ANM5_HUMAN Protein arginine N-methyltransferase 5 OS=Homo sapiens OX=9606 GN=PRMT5 PE=1 SV=4	||TLC(BTD[C])DYSK|	||1|	||0.21|	||NA|	0.21	NA	1	1
Q14166	370	TTLL12	TTLL12_370	TTL12_HUMAN Tubulin--tyrosine ligase-like protein 12 OS=Homo sapiens OX=9606 GN=TTLL12 PE=1 SV=2	|||DC(BTD[C])LASIAR	|||2	|||0.21	|||0.01414	0.21	NA	2	1
Q02978	184	SLC25A11	SLC25A11_184	M2OM_HUMAN Mitochondrial 2-oxoglutarate/malate carrier protein OS=Homo sapiens OX=9606 GN=SLC25A11 PE=1 SV=3	||GC(BTD[C])IPTMAR|GC(BTD[C])IPTMAR	||1|1	||0.46|0.36	||NA|NA	0.41	0.07	2	2
P05023	374	ATP1A1	ATP1A1_374	AT1A1_HUMAN Sodium/potassium-transporting ATPase subunit alpha-1 OS=Homo sapiens OX=9606 GN=ATP1A1 PE=1 SV=1	NLEAVETLGSTSTIC(BTD[C])SDK|NLEAVETLGSTSTIC(BTD[C])SDK||	1|1||	0.45|0.41||	NA|NA||	0.43	0.03	2	2
O96019	32	ACTL6A	ACTL6A_32	ACL6A_HUMAN Actin-like protein 6A OS=Homo sapiens OX=9606 GN=ACTL6A PE=1 SV=1	||AGYAGEDC(BTD[C])PK|	||1|	||0.53|	||NA|	0.53	NA	1	1
Q9H814	51	PHAX	PHAX_51	PHAX_HUMAN Phosphorylated adapter RNA export protein OS=Homo sapiens OX=9606 GN=PHAX PE=1 SV=1	FQNTATAC(BTD[C])APVSHYR|FQNTATAC(BTD[C])APVSHYR||	1|1||	0.65|0.44||	NA|NA||	0.55	0.15	2	2
Q13404	71	UBE2V1	UBE2V1_71	UB2V1_HUMAN Ubiquitin-conjugating enzyme E2 variant 1 OS=Homo sapiens OX=9606 GN=UBE2V1 PE=1 SV=2	|||IEC(BTD[C])GPK	|||1	|||0.57	|||NA	0.57	NA	1	1
Q96F24	155	NRBF2	NRBF2_155	NRBF2_HUMAN Nuclear receptor-binding factor 2 OS=Homo sapiens OX=9606 GN=NRBF2 PE=1 SV=1	|||SEPAEPC(BTD[C])IGSK	|||1	|||0.61	|||NA	0.61	NA	1	1
P33991	328	MCM4	MCM4_328	MCM4_HUMAN DNA replication licensing factor MCM4 OS=Homo sapiens OX=9606 GN=MCM4 PE=1 SV=5	||IAEPSVC(BTD[C])GR|	||1|	||0.69|	||NA|	0.69	NA	1	1
Q9NR50	64	EIF2B3	EIF2B3_64	EI2BG_HUMAN Translation initiation factor eIF-2B subunit gamma OS=Homo sapiens OX=9606 GN=EIF2B3 PE=1 SV=1	|||ALC(BTD[C])AEFK	|||1	|||0.76	|||NA	0.76	NA	1	1
P13804	53	ETFA	ETFA_53	ETFA_HUMAN Electron transfer flavoprotein subunit alpha, mitochondrial OS=Homo sapiens OX=9606 GN=ETFA PE=1 SV=1	LGGEVSC(BTD[C])LVAGTK|LGGEVSC(BTD[C])LVAGTK||	1|1||	0.87|0.67||	NA|NA||	0.77	0.14	2	2
Q9NT62	182	ATG3	ATG3_182	ATG3_HUMAN Ubiquitin-like-conjugating enzyme ATG3 OS=Homo sapiens OX=9606 GN=ATG3 PE=1 SV=1	|KIVEAC(BTD[C])K|KIVEAC(BTD[C])K|	|1|1|	|1.17|0.39|	|NA|NA|	0.78	0.55	2	2
P49588	671	AARS	AARS_671	SYAC_HUMAN Alanine--tRNA ligase, cytoplasmic OS=Homo sapiens OX=9606 GN=AARS PE=1 SV=2	|||AVYTQDC(BTD[C])PLAAAK	|||1	|||0.85	|||NA	0.85	NA	1	1
Q96FZ2	39	HMCES	HMCES_39	HMCES_HUMAN Abasic site processing protein HMCES OS=Homo sapiens OX=9606 GN=HMCES PE=1 SV=1	||DPDKYC(BTD[C])PSYNK|	||1|	||0.89|	||NA|	0.89	NA	1	1
O95825	184	CRYZL1	CRYZL1_184	QORL1_HUMAN Quinone oxidoreductase-like protein 1 OS=Homo sapiens OX=9606 GN=CRYZL1 PE=1 SV=2	|VISTACSLEDKQC(BTD[C])LER||	|1||	|0.9||	|NA||	0.9	NA	1	1
P26639	261	TARS	TARS_261	SYTC_HUMAN Threonine--tRNA ligase, cytoplasmic OS=Homo sapiens OX=9606 GN=TARS PE=1 SV=3	CGPLIDLC(BTD[C])R|||	1|||	0.92|||	NA|||	0.92	NA	1	1
Q92598	796	HSPH1	HSPH1_796	HS105_HUMAN Heat shock protein 105 kDa OS=Homo sapiens OX=9606 GN=HSPH1 PE=1 SV=1	|ELNNTC(BTD[C])EPVVTQPKPK||	|1||	|0.93||	|NA||	0.93	NA	1	1
O75083	194	WDR1	WDR1_194	WDR1_HUMAN WD repeat-containing protein 1 OS=Homo sapiens OX=9606 GN=WDR1 PE=1 SV=4	|FVNC(BTD[C])VR||	|1||	|0.93||	|NA||	0.93	NA	1	1
P50991	337	CCT4	CCT4_337	TCPD_HUMAN T-complex protein 1 subunit delta OS=Homo sapiens OX=9606 GN=CCT4 PE=1 SV=4	||EDIEFIC(BTD[C])K|EDIEFIC(BTD[C])K	||1|1	||0.98|0.89	||NA|NA	0.94	0.06	2	2
Q9BXP5	412	SRRT	SRRT_412	SRRT_HUMAN Serrate RNA effector molecule homolog OS=Homo sapiens OX=9606 GN=SRRT PE=1 SV=1	||DAAGLEC(BTD[C])KPR|DAAGLEC(BTD[C])KPR	||1|1	||1.06|0.83	||NA|NA	0.95	0.16	2	2
Q15642	99	TRIP10	TRIP10_99	CIP4_HUMAN Cdc42-interacting protein 4 OS=Homo sapiens OX=9606 GN=TRIP10 PE=1 SV=3	||VC(BTD[C])LELTK|	||1|	||0.95|	||NA|	0.95	NA	1	1
O75367	297	H2AFY	H2AFY_297	H2AY_HUMAN Core histone macro-H2A.1 OS=Homo sapiens OX=9606 GN=H2AFY PE=1 SV=4	||NC(BTD[C])LALADDKK|NC(BTD[C])LALADDKK	||1|2	||1.0|0.905	||NA|0.03536	0.95	0.07	3	2
P63241	73	EIF5A	EIF5A_73	IF5A1_HUMAN Eukaryotic translation initiation factor 5A-1 OS=Homo sapiens OX=9606 GN=EIF5A PE=1 SV=2	|KYEDIC(BTD[C])PSTHNMDVPNIK||	|1||	|0.96||	|NA||	0.96	NA	1	1
Q9NSE4	323	IARS2	IARS2_323	SYIM_HUMAN Isoleucine--tRNA ligase, mitochondrial OS=Homo sapiens OX=9606 GN=IARS2 PE=1 SV=2	YAVVKC(BTD[C])SK|YAVVKC(BTD[C])SK||	1|1||	0.94|1.0||	NA|NA||	0.97	0.04	2	2
P07437	354	TUBB	TUBB_354	TBB5_HUMAN Tubulin beta chain OS=Homo sapiens OX=9606 GN=TUBB PE=1 SV=2	||TAVC(BTD[C])DIPPR|TAVC(BTD[C])DIPPR	||3|4	||1.05|0.935	||1.08337|0.42531	0.99	0.08	7	2
Q96EN8	424	MOCOS	MOCOS_424	MOCOS_HUMAN Molybdenum cofactor sulfurase OS=Homo sapiens OX=9606 GN=MOCOS PE=1 SV=2	||TGCFC(BTD[C])NTGACQR|TGCFC(BTD[C])NTGACQR	||1|1	||0.69|1.36	||NA|NA	1.03	0.47	2	2	Active site
Q08211	469	DHX9	DHX9_469	DHX9_HUMAN ATP-dependent RNA helicase A OS=Homo sapiens OX=9606 GN=DHX9 PE=1 SV=4	|SC(BTD[C])GYSVR|SC(BTD[C])GYSVR|SC(BTD[C])GYSVR	|1|1|1	|0.8|1.26|1.04	|NA|NA|NA	1.03	0.23	3	3
P52272	114	HNRNPM	HNRNPM_114	HNRPM_HUMAN Heterogeneous nuclear ribonucleoprotein M OS=Homo sapiens OX=9606 GN=HNRNPM PE=1 SV=3	GC(BTD[C])AVVEFK|||	1|||	1.05|||	NA|||	1.05	NA	1	1
P14866	581	HNRNPL	HNRNPL_581	HNRPL_HUMAN Heterogeneous nuclear ribonucleoprotein L OS=Homo sapiens OX=9606 GN=HNRNPL PE=1 SV=2	LC(BTD[C])FSTAQHAS|LC(BTD[C])FSTAQHAS||	3|1||	0.98|1.15||	0.0|NA||	1.07	0.12	4	2
P21399	50	ACO1	ACO1_50	ACOC_HUMAN Cytoplasmic aconitate hydratase OS=Homo sapiens OX=9606 GN=ACO1 PE=1 SV=3	||NC(BTD[C])DEFLVK|	||1|	||1.09|	||NA|	1.09	NA	1	1
P49327	212	FASN	FASN_212	FAS_HUMAN Fatty acid synthase OS=Homo sapiens OX=9606 GN=FASN PE=1 SV=3	||LGMLSPEGTC(BTD[C])K|	||1|	||1.1|	||NA|	1.1	NA	1	1
Q4V328	243	GRIPAP1	GRIPAP1_243	GRAP1_HUMAN GRIP1-associated protein 1 OS=Homo sapiens OX=9606 GN=GRIPAP1 PE=1 SV=2	KQESFC(BTD[C])R|KQESFC(BTD[C])R||	1|1||	1.09|1.12||	NA|NA||	1.11	0.02	2	2
Q7LBC6	1357	KDM3B	KDM3B_1357	KDM3B_HUMAN Lysine-specific demethylase 3B OS=Homo sapiens OX=9606 GN=KDM3B PE=1 SV=2	RAC(BTD[C])NLTDTQK|||	1|||	1.11|||	NA|||	1.11	NA	1	1
Q9H7Z7	110	PTGES2	PTGES2_110	PGES2_HUMAN Prostaglandin E synthase 2 OS=Homo sapiens OX=9606 GN=PTGES2 PE=1 SV=1	|TC(BTD[C])PFCSK||TC(BTD[C])PFCSK	|2||2	|1.07||1.15	|0.0||0.0	1.11	0.06	4	2
P14543	839	NID1	NID1_839	NID1_HUMAN Nidogen-1 OS=Homo sapiens OX=9606 GN=NID1 PE=1 SV=3	||C(BTD[C])VPGEVEK|C(BTD[C])VPGEVEK	||1|1	||1.28|0.94	||NA|NA	1.11	0.24	2	2	Disulfide bond
Q9BQB6	43	VKORC1	VKORC1_43	VKOR1_HUMAN Vitamin K epoxide reductase complex subunit 1 OS=Homo sapiens OX=9606 GN=VKORC1 PE=1 SV=1	||ALC(BTD[C])DVGTAISCSR|	||1|	||1.11|	||NA|	1.11	NA	1	1
Q9H2G2	552	SLK	SLK_552	SLK_HUMAN STE20-like serine/threonine-protein kinase OS=Homo sapiens OX=9606 GN=SLK PE=1 SV=1	||DVISNTSDVIGTC(BTD[C])EAADVAQK|	||1|	||1.12|	||NA|	1.12	NA	1	1
P46060	152	RANGAP1	RANGAP1_152	RAGP1_HUMAN Ran GTPase-activating protein 1 OS=Homo sapiens OX=9606 GN=RANGAP1 PE=1 SV=1	||LNNC(BTD[C])GMGIGGGK|	||1|	||1.13|	||NA|	1.13	NA	1	1
Q8TCD1	71	C18orf32	C18orf32_71	CR032_HUMAN UPF0729 protein C18orf32 OS=Homo sapiens OX=9606 GN=C18orf32 PE=3 SV=1	||GPTEIC(BTD[C])DK|GPTEIC(BTD[C])DK	||1|1	||1.32|0.97	||NA|NA	1.15	0.25	2	2
P07237	343	P4HB	P4HB_343	PDIA1_HUMAN Protein disulfide-isomerase OS=Homo sapiens OX=9606 GN=P4HB PE=1 SV=3	||ITEFC(BTD[C])HR|	||1|	||1.15|	||NA|	1.15	NA	1	1
P21108	165	PRPS1L1	PRPS1L1_165	PRPS3_HUMAN Ribose-phosphate pyrophosphokinase 3 OS=Homo sapiens OX=9606 GN=PRPS1L1 PE=1 SV=2	||NC(BTD[C])IIVSPDAGGAK|	||1|	||1.15|	||NA|	1.15	NA	1	1
Q9GZT9	127	EGLN1	EGLN1_127	EGLN1_HUMAN Egl nine homolog 1 OS=Homo sapiens OX=9606 GN=EGLN1 PE=1 SV=1	|AKPPADPAAAASPC(BTD[C])R||	|1||	|1.17||	|NA||	1.17	NA	1	1
Q7L5N1	299	COPS6	COPS6_299	CSN6_HUMAN COP9 signalosome complex subunit 6 OS=Homo sapiens OX=9606 GN=COPS6 PE=1 SV=1	||TC(BTD[C])NTMNQFVNK|	||1|	||1.17|	||NA|	1.17	NA	1	1
O75153	1196	CLUH	CLUH_1196	CLU_HUMAN Clustered mitochondria protein homolog OS=Homo sapiens OX=9606 GN=CLUH PE=1 SV=2	ESSEYLKC(BTD[C])LTQQAVALQR|ESSEYLKC(BTD[C])LTQQAVALQR||	1|1||	1.04|1.34||	NA|NA||	1.19	0.21	2	2
O00410	972	IPO5	IPO5_972	IPO5_HUMAN Importin-5 OS=Homo sapiens OX=9606 GN=IPO5 PE=1 SV=4	||ENVNATENC(BTD[C])ISAVGK|	||1|	||1.19|	||NA|	1.19	NA	1	1
P46199	646	MTIF2	MTIF2_646	IF2M_HUMAN Translation initiation factor IF-2, mitochondrial OS=Homo sapiens OX=9606 GN=MTIF2 PE=1 SV=2	KVPVAGC(BTD[C])R|||	1|||	1.2|||	NA|||	1.2	NA	1	1
P14618	358	PKM	PKM_358	KPYM_HUMAN Pyruvate kinase PKM OS=Homo sapiens OX=9606 GN=PKM PE=1 SV=4	|||AEGSDVANAVLDGADC(BTD[C])IMLSGETAK	|||1	|||1.2	|||NA	1.2	NA	1	1
P36952	323	SERPINB5	SERPINB5_323	SPB5_HUMAN Serpin B5 OS=Homo sapiens OX=9606 GN=SERPINB5 PE=1 SV=2	||VC(BTD[C])LEITEDGGDSIEVPGAR|	||1|	||1.22|	||NA|	1.22	NA	1	1
P49841	76	GSK3B	GSK3B_76	GSK3B_HUMAN Glycogen synthase kinase-3 beta OS=Homo sapiens OX=9606 GN=GSK3B PE=1 SV=2	||LC(BTD[C])DSGELVAIK|	||1|	||1.24|	||NA|	1.24	NA	1	1
P53396	229	ACLY	ACLY_229	ACLY_HUMAN ATP-citrate synthase OS=Homo sapiens OX=9606 GN=ACLY PE=1 SV=3	|||VDATADYIC(BTD[C])K	|||1	|||1.24	|||NA	1.24	NA	1	1
Q8NFJ5	284	GPRC5A	GPRC5A_284	RAI3_HUMAN Retinoic acid-induced protein 3 OS=Homo sapiens OX=9606 GN=GPRC5A PE=1 SV=2	|||NPMDYPVEDAFC(BTD[C])KPQLVK	|||1	|||1.24	|||NA	1.24	NA	1	1
Q13126	55	MTAP	MTAP_55	MTAP_HUMAN S-methyl-5'-thioadenosine phosphorylase OS=Homo sapiens OX=9606 GN=MTAP PE=1 SV=2	|||NVDC(BTD[C])VLLAR	|||1	|||1.24	|||NA	1.24	NA	1	1
Q06323	106	PSME1	PSME1_106	PSME1_HUMAN Proteasome activator complex subunit 1 OS=Homo sapiens OX=9606 GN=PSME1 PE=1 SV=1	|KGEDEDKGPPCGPVNC(BTD[C])NEK||	|1||	|1.26||	|NA||	1.26	NA	1	1
Q9GZT3	48	SLIRP	SLIRP_48	SLIRP_HUMAN SRA stem-loop-interacting RNA-binding protein, mitochondrial OS=Homo sapiens OX=9606 GN=SLIRP PE=1 SV=1	|RC(BTD[C])ILPFDK||	|1||	|1.26||	|NA||	1.26	NA	1	1
Q8N335	104	GPD1L	GPD1L_104	GPD1L_HUMAN Glycerol-3-phosphate dehydrogenase 1-like protein OS=Homo sapiens OX=9606 GN=GPD1L PE=1 SV=1	|||IC(BTD[C])DEITGR	|||2	|||1.28	|||0.0	1.28	NA	2	1
O95260	138	ATE1	ATE1_138	ATE1_HUMAN Arginyl-tRNA--protein transferase 1 OS=Homo sapiens OX=9606 GN=ATE1 PE=1 SV=2	||LDIQC(BTD[C])DLK|	||1|	||1.32|	||NA|	1.32	NA	1	1
O00232	193	PSMD12	PSMD12_193	PSD12_HUMAN 26S proteasome non-ATPase regulatory subunit 12 OS=Homo sapiens OX=9606 GN=PSMD12 PE=1 SV=3	|||LC(BTD[C])LAVK	|||1	|||1.32	|||NA	1.32	NA	1	1
Q13867	269	BLMH	BLMH_269	BLMH_HUMAN Bleomycin hydrolase OS=Homo sapiens OX=9606 GN=BLMH PE=1 SV=1	IC(BTD[C])LVNDPRPQHK|||	1|||	1.33|||	NA|||	1.33	NA	1	1
Q96QK1	653	VPS35	VPS35_653	VPS35_HUMAN Vacuolar protein sorting-associated protein 35 OS=Homo sapiens OX=9606 GN=VPS35 PE=1 SV=2	|||TQC(BTD[C])ALAASK	|||1	|||1.33	|||NA	1.33	NA	1	1
P63000	178	RAC1	RAC1_178	RAC1_HUMAN Ras-related C3 botulinum toxin substrate 1 OS=Homo sapiens OX=9606 GN=RAC1 PE=1 SV=1	AVLC(BTD[C])PPPVK|AVLC(BTD[C])PPPVK||	1|1||	1.15|1.55||	NA|NA||	1.35	0.28	2	2
Q14008	1113	CKAP5	CKAP5_1113	CKAP5_HUMAN Cytoskeleton-associated protein 5 OS=Homo sapiens OX=9606 GN=CKAP5 PE=1 SV=3	FQPASAPAEDC(BTD[C])ISSSTEPKPDPK|||	1|||	1.37|||	NA|||	1.37	NA	1	1
Q14152	478	EIF3A	EIF3A_478	EIF3A_HUMAN Eukaryotic translation initiation factor 3 subunit A OS=Homo sapiens OX=9606 GN=EIF3A PE=1 SV=1	HC(BTD[C])DLQVR|HC(BTD[C])DLQVR||	1|2||	0.93|1.87||	NA|1.30108||	1.4	0.66	3	2
Q8N684	399	CPSF7	CPSF7_399	CPSF7_HUMAN Cleavage and polyadenylation specificity factor subunit 7 OS=Homo sapiens OX=9606 GN=CPSF7 PE=1 SV=1	||DC(BTD[C])LHGIEAK|DC(BTD[C])LHGIEAK	||1|1	||1.4|1.4	||NA|NA	1.4	0	2	2
Q92841	584	DDX17	DDX17_584	DDX17_HUMAN Probable ATP-dependent RNA helicase DDX17 OS=Homo sapiens OX=9606 GN=DDX17 PE=1 SV=2	TTSSANNPNLMYQDEC(BTD[C])DRR|||	1|||	1.45|||	NA|||	1.45	NA	1	1
P39023	157	RPL3	RPL3_157	RL3_HUMAN 60S ribosomal protein L3 OS=Homo sapiens OX=9606 GN=RPL3 PE=1 SV=2	|YC(BTD[C])QVIR||	|2||	|1.455||	|0.50205||	1.46	NA	2	1
Q9UHB9	173	SRP68	SRP68_173	SRP68_HUMAN Signal recognition particle subunit SRP68 OS=Homo sapiens OX=9606 GN=SRP68 PE=1 SV=2	|LC(BTD[C])ESNR|LC(BTD[C])ESNR|LC(BTD[C])ESNR	|1|2|2	|1.38|1.47|1.53	|NA|0.66468|0.0	1.46	0.08	5	3
Q9BVQ7	580	SPATA5L1	SPATA5L1_580	SPA5L_HUMAN Spermatogenesis-associated protein 5-like protein 1 OS=Homo sapiens OX=9606 GN=SPATA5L1 PE=1 SV=2	||TGC(BTD[C])DVQER|TGC(BTD[C])DVQER	||1|1	||2.25|0.68	||NA|NA	1.47	1.11	2	2
P62424	199	RPL7A	RPL7A_199	RL7A_HUMAN 60S ribosomal protein L7a OS=Homo sapiens OX=9606 GN=RPL7A PE=1 SV=2	||TC(BTD[C])TTVAFTQVNSEDK|	||1|	||1.47|	||NA|	1.47	NA	1	1
P30566	266	ADSL	ADSL_266	PUR8_HUMAN Adenylosuccinate lyase OS=Homo sapiens OX=9606 GN=ADSL PE=1 SV=2	IC(BTD[C])TDIR|IC(BTD[C])TDIR||	2|1||	1.11|1.87||	0.0|NA||	1.49	0.54	3	2
P60174	124	TPI1	TPI1_124	TPIS_HUMAN Triosephosphate isomerase OS=Homo sapiens OX=9606 GN=TPI1 PE=1 SV=3	DC(BTD[C])GATWVVLGHSER|||	1|||	1.5|||	NA|||	1.5	NA	1	1
O15067	502	PFAS	PFAS_502	PUR4_HUMAN Phosphoribosylformylglycinamidine synthase OS=Homo sapiens OX=9606 GN=PFAS PE=1 SV=4	||AC(BTD[C])VEAPK|	||1|	||1.51|	||NA|	1.51	NA	1	1
O75369	2333	FLNB	FLNB_2333	FLNB_HUMAN Filamin-B OS=Homo sapiens OX=9606 GN=FLNB PE=1 SV=2	VHSPSGAVEEC(BTD[C])HVSELEPDK|||	1|||	1.52|||	NA|||	1.52	NA	1	1
P49458	48	SRP9	SRP9_48	SRP09_HUMAN Signal recognition particle 9 kDa protein OS=Homo sapiens OX=9606 GN=SRP9 PE=1 SV=2	TDDLVC(BTD[C])LVYK|||	1|||	1.53|||	NA|||	1.53	NA	1	1
Q5SW79	776	CEP170	CEP170_776	CE170_HUMAN Centrosomal protein of 170 kDa OS=Homo sapiens OX=9606 GN=CEP170 PE=1 SV=1	NVSGQTDKC(BTD[C])R|||	1|||	1.54|||	NA|||	1.54	NA	1	1
P11142	603	HSPA8	HSPA8_603	HSP7C_HUMAN Heat shock cognate 71 kDa protein OS=Homo sapiens OX=9606 GN=HSPA8 PE=1 SV=1	|VC(BTD[C])NPIITK|VC(BTD[C])NPIITK|VC(BTD[C])NPIITK	|2|2|4	|1.155|1.79|1.73	|0.00707|0.0|0.03697	1.56	0.35	8	3
P20290	22	BTF3	BTF3_22	BTF3_HUMAN Transcription factor BTF3 OS=Homo sapiens OX=9606 GN=BTF3 PE=1 SV=1	||GGC(BTD[C])PGGEATLSQPPPR|	||1|	||1.56|	||NA|	1.56	NA	1	1
P62316	63	SNRPD2	SNRPD2_63	SMD2_HUMAN Small nuclear ribonucleoprotein Sm D2 OS=Homo sapiens OX=9606 GN=SNRPD2 PE=1 SV=1	HC(BTD[C])NMVLENVK|||	2|||	1.575|||	0.23335|||	1.58	NA	2	1
P54577	501	YARS	YARS_501	SYYC_HUMAN Tyrosine--tRNA ligase, cytoplasmic OS=Homo sapiens OX=9606 GN=YARS PE=1 SV=4	ISEEC(BTD[C])IAQWK|||	1|||	1.58|||	NA|||	1.58	NA	1	1
P36578	208	RPL4	RPL4_208	RL4_HUMAN 60S ribosomal protein L4 OS=Homo sapiens OX=9606 GN=RPL4 PE=1 SV=5	||GPC(BTD[C])IIYNEDNGIIK|	||1|	||1.58|	||NA|	1.58	NA	1	1
P49368	40	CCT3	CCT3_40	TCPG_HUMAN T-complex protein 1 subunit gamma OS=Homo sapiens OX=9606 GN=CCT3 PE=1 SV=4	TC(BTD[C])LGPK|TC(BTD[C])LGPK|TC(BTD[C])LGPK|TC(BTD[C])LGPK	1|1|2|2	1.04|1.12|3.075|1.23	NA|NA|0.00707|0.0	1.62	0.98	6	4
O75369	2154	FLNB	FLNB_2154	FLNB_HUMAN Filamin-B OS=Homo sapiens OX=9606 GN=FLNB PE=1 SV=2	||NSHC(BTD[C])VR|NSHC(BTD[C])VR	||1|1	||1.54|1.7	||NA|NA	1.62	0.11	2	2
Q8TDH9	117	BLOC1S5	BLOC1S5_117	BL1S5_HUMAN Biogenesis of lysosome-related organelles complex 1 subunit 5 OS=Homo sapiens OX=9606 GN=BLOC1S5 PE=1 SV=1	LQAANDSVC(BTD[C])R|LQAANDSVC(BTD[C])R||	1|1||	1.66|1.59||	NA|NA||	1.63	0.05	2	2
P35610	528	SOAT1	SOAT1_528	SOAT1_HUMAN Sterol O-acyltransferase 1 OS=Homo sapiens OX=9606 GN=SOAT1 PE=1 SV=3	QHC(BTD[C])PLK|QHC(BTD[C])PLK||	1|1||	2.02|1.26||	NA|NA||	1.64	0.54	2	2	Disulfide bond
P83731	36	RPL24	RPL24_36	RL24_HUMAN 60S ribosomal protein L24 OS=Homo sapiens OX=9606 GN=RPL24 PE=1 SV=1	AKC(BTD[C])ESAFLSK|||AKC(BTD[C])ESAFLSK	2|||1	2.435|||0.85	0.81317|||NA	1.64	1.12	3	2
Q86SE5	51	RALYL	RALYL_51	RALYL_HUMAN RNA-binding Raly-like protein OS=Homo sapiens OX=9606 GN=RALYL PE=1 SV=2	|||IVGC(BTD[C])SVHK	|||1	|||1.65	|||NA	1.65	NA	1	1
Q99460	112	PSMD1	PSMD1_112	PSMD1_HUMAN 26S proteasome non-ATPase regulatory subunit 1 OS=Homo sapiens OX=9606 GN=PSMD1 PE=1 SV=2	|||QC(BTD[C])VENADLPEGEK	|||1	|||1.7	|||NA	1.7	NA	1	1
Q86TC9	1214	MYPN	MYPN_1214	MYPN_HUMAN Myopalladin OS=Homo sapiens OX=9606 GN=MYPN PE=1 SV=2	||DNETIPC(BTD[C])TR|DNETIPC(BTD[C])TR	||1|1	||1.99|1.44	||NA|NA	1.72	0.39	2	2
P49903	337	SEPHS1	SEPHS1_337	SPS1_HUMAN Selenide, water dikinase 1 OS=Homo sapiens OX=9606 GN=SEPHS1 PE=1 SV=2	|||FC(BTD[C])AEIK	|||2	|||1.715	|||0.02121	1.72	NA	2	1
Q9UJ83	392	HACL1	HACL1_392	HACL1_HUMAN 2-hydroxyacyl-CoA lyase 1 OS=Homo sapiens OX=9606 GN=HACL1 PE=1 SV=2	|||DC(BTD[C])FVVSEGANTMDIGR	|||1	|||1.72	|||NA	1.72	NA	1	1
P00558	99	PGK1	PGK1_99	PGK1_HUMAN Phosphoglycerate kinase 1 OS=Homo sapiens OX=9606 GN=PGK1 PE=1 SV=3	|DC(BTD[C])VGPEVEK|DC(BTD[C])VGPEVEK|DC(BTD[C])VGPEVEK	|2|3|4	|1.13|2.0|2.045	|0.01414|0.05132|0.06856	1.73	0.52	9	3
Q00839	389	HNRNPU	HNRNPU_389	HNRPU_HUMAN Heterogeneous nuclear ribonucleoprotein U OS=Homo sapiens OX=9606 GN=HNRNPU PE=1 SV=6	||TC(BTD[C])NCETEDYGEK|TC(BTD[C])NCETEDYGEK	||1|2	||1.81|1.64	||NA|0.0	1.73	0.12	3	2
Q15233	145	NONO	NONO_145	NONO_HUMAN Non-POU domain-containing octamer-binding protein OS=Homo sapiens OX=9606 GN=NONO PE=1 SV=4	FAC(BTD[C])HSASLTVR|||	1|||	1.74|||	NA|||	1.74	NA	1	1
P49327	1548	FASN	FASN_1548	FAS_HUMAN Fatty acid synthase OS=Homo sapiens OX=9606 GN=FASN PE=1 SV=3	WVC(BTD[C])SSLR|||	1|||	1.74|||	NA|||	1.74	NA	1	1
Q00610	459	CLTC	CLTC_459	CLH1_HUMAN Clathrin heavy chain 1 OS=Homo sapiens OX=9606 GN=CLTC PE=1 SV=5	||EDKLEC(BTD[C])SEELGDLVK|	||1|	||1.74|	||NA|	1.74	NA	1	1
Q96QK1	699	VPS35	VPS35_699	VPS35_HUMAN Vacuolar protein sorting-associated protein 35 OS=Homo sapiens OX=9606 GN=VPS35 PE=1 SV=2	VMEC(BTD[C])LKK||VMEC(BTD[C])LKK|VMEC(BTD[C])LKK	1||1|1	0.99||0.54|3.72	NA||NA|NA	1.75	1.72	3	3
O00116	349	AGPS	AGPS_349	ADAS_HUMAN Alkyldihydroxyacetonephosphate synthase, peroxisomal OS=Homo sapiens OX=9606 GN=AGPS PE=1 SV=1	||SC(BTD[C])QGPR|SC(BTD[C])QGPR	||1|1	||1.64|1.86	||NA|NA	1.75	0.16	2	2
P26368	464	U2AF2	U2AF2_464	U2AF2_HUMAN Splicing factor U2AF 65 kDa subunit OS=Homo sapiens OX=9606 GN=U2AF2 PE=1 SV=4	YC(BTD[C])DPDSYHR|YC(BTD[C])DPDSYHR|YC(BTD[C])DPDSYHR|YC(BTD[C])DPDSYHR	2|3|1|2	1.78|1.58|1.74|1.92	0.0|0.03464|NA|0.0	1.76	0.14	8	4
P15291	172	B4GALT1	B4GALT1_172	B4GT1_HUMAN Beta-1,4-galactosyltransferase 1 OS=Homo sapiens OX=9606 GN=B4GALT1 PE=1 SV=5	DC(BTD[C])VSPHK|DC(BTD[C])VSPHK|DC(BTD[C])VSPHK|DC(BTD[C])VSPHK	2|2|2|2	1.155|1.26|2.36|2.255	0.09192|0.01414|0.0|0.02121	1.76	0.64	8	4	Disulfide bond
Q9BSD7	101	NTPCR	NTPCR_101	NTPCR_HUMAN Cancer-related nucleoside-triphosphatase OS=Homo sapiens OX=9606 GN=NTPCR PE=1 SV=1	||NADC(BTD[C])SSGPGQR|	||1|	||1.77|	||NA|	1.77	NA	1	1
P62910	96	RPL32	RPL32_96	RL32_HUMAN 60S ribosomal protein L32 OS=Homo sapiens OX=9606 GN=RPL32 PE=1 SV=2	|SYC(BTD[C])AEIAHNVSSK||	|1||	|1.8||	|NA||	1.8	NA	1	1
Q92896	324	GLG1	GLG1_324	GSLG1_HUMAN Golgi apparatus protein 1 OS=Homo sapiens OX=9606 GN=GLG1 PE=1 SV=2	||FC(BTD[C])ENTQAGEGR|FC(BTD[C])ENTQAGEGR	||1|1	||1.88|1.73	||NA|NA	1.81	0.11	2	2
P62937	52	PPIA	PPIA_52	PPIA_HUMAN Peptidyl-prolyl cis-trans isomerase A OS=Homo sapiens OX=9606 GN=PPIA PE=1 SV=2	GSC(BTD[C])FHR|GSC(BTD[C])FHR|GSC(BTD[C])FHR|	2|1|1|	1.75|1.88|1.86|	0.0|NA|NA|	1.83	0.07	4	3
Q07955	16	SRSF1	SRSF1_16	SRSF1_HUMAN Serine/arginine-rich splicing factor 1 OS=Homo sapiens OX=9606 GN=SRSF1 PE=1 SV=2	|GPAGNNDC(BTD[C])R|GPAGNNDC(BTD[C])R|	|1|2|	|1.84|1.91|	|NA|0.02828|	1.88	0.05	3	2
Q14204	633	DYNC1H1	DYNC1H1_633	DYHC1_HUMAN Cytoplasmic dynein 1 heavy chain 1 OS=Homo sapiens OX=9606 GN=DYNC1H1 PE=1 SV=5	|VQYPQSQAC(BTD[C])K||	|1||	|1.88||	|NA||	1.88	NA	1	1
Q9NUQ8	4	ABCF3	ABCF3_4	ABCF3_HUMAN ATP-binding cassette sub-family F member 3 OS=Homo sapiens OX=9606 GN=ABCF3 PE=1 SV=2	|||TC(BTD[C])AEILR	|||1	|||1.88	|||NA	1.88	NA	1	1
P61106	26	RAB14	RAB14_26	RAB14_HUMAN Ras-related protein Rab-14 OS=Homo sapiens OX=9606 GN=RAB14 PE=1 SV=4	|SC(BTD[C])LLHQFTEK|SC(BTD[C])LLHQFTEK|	|2|2|	|2.52|1.25|	|0.0|0.82024|	1.89	0.9	4	2
P09960	147	LTA4H	LTA4H_147	LKHA4_HUMAN Leukotriene A-4 hydrolase OS=Homo sapiens OX=9606 GN=LTA4H PE=1 SV=2	||AILPC(BTD[C])QDTPSVK|	||1|	||1.89|	||NA|	1.89	NA	1	1
P39023	336	RPL3	RPL3_336	RL3_HUMAN 60S ribosomal protein L3 OS=Homo sapiens OX=9606 GN=RPL3 PE=1 SV=2	||GC(BTD[C])VVGTK|GC(BTD[C])VVGTK	||2|1	||1.54|2.25	||1.15966|NA	1.9	0.5	3	2
Q99613	752	EIF3C	EIF3C_752	EIF3C_HUMAN Eukaryotic translation initiation factor 3 subunit C OS=Homo sapiens OX=9606 GN=EIF3C PE=1 SV=1	|||TC(BTD[C])HSFIINEK	|||1	|||1.9	|||NA	1.9	NA	1	1
P61221	38	ABCE1	ABCE1_38	ABCE1_HUMAN ATP-binding cassette sub-family E member 1 OS=Homo sapiens OX=9606 GN=ABCE1 PE=1 SV=1	||LC(BTD[C])IEVTPQSK|LC(BTD[C])IEVTPQSK	||1|1	||2.12|1.69	||NA|NA	1.91	0.3	2	2
P50914	42	RPL14	RPL14_42	RL14_HUMAN 60S ribosomal protein L14 OS=Homo sapiens OX=9606 GN=RPL14 PE=1 SV=4	|||LVDGPC(BTD[C])TQVR	|||1	|||1.91	|||NA	1.91	NA	1	1
Q8TBZ6	37	TRMT10A	TRMT10A_37	TM10A_HUMAN tRNA methyltransferase 10 homolog A OS=Homo sapiens OX=9606 GN=TRMT10A PE=1 SV=1	||LGEGC(BTD[C])EPISK|	||1|	||1.92|	||NA|	1.92	NA	1	1
P16455	145	MGMT	MGMT_145	MGMT_HUMAN Methylated-DNA--protein-cysteine methyltransferase OS=Homo sapiens OX=9606 GN=MGMT PE=1 SV=1	GNPVPILIPC(BTD[C])HR|GNPVPILIPC(BTD[C])HR||	1|2||	2.87|1.035||	NA|0.12021||	1.95	1.3	3	2	Active site
P61313	110	RPL15	RPL15_110	RL15_HUMAN 60S ribosomal protein L15 OS=Homo sapiens OX=9606 GN=RPL15 PE=1 SV=2	HC(BTD[C])GALR|HC(BTD[C])GALR||	2|1||	1.925|2.0||	0.81317|NA||	1.96	0.05	3	2
Q9NV96	17	TMEM30A	TMEM30A_17	CC50A_HUMAN Cell cycle control protein 50A OS=Homo sapiens OX=9606 GN=TMEM30A PE=1 SV=1	||DEVDGGPPC(BTD[C])APGGTAK|	||1|	||1.97|	||NA|	1.97	NA	1	1
Q96RS6	376	NUDCD1	NUDCD1_376	NUDC1_HUMAN NudC domain-containing protein 1 OS=Homo sapiens OX=9606 GN=NUDCD1 PE=1 SV=2	|||DSAQC(BTD[C])AAIAER	|||1	|||1.97	|||NA	1.97	NA	1	1
Q9BZE4	138	GTPBP4	GTPBP4_138	NOG1_HUMAN Nucleolar GTP-binding protein 1 OS=Homo sapiens OX=9606 GN=GTPBP4 PE=1 SV=3	||MC(BTD[C])TVIK|MC(BTD[C])TVIK	||1|1	||1.84|2.11	||NA|NA	1.98	0.19	2	2
P85037	665	FOXK1	FOXK1_665	FOXK1_HUMAN Forkhead box protein K1 OS=Homo sapiens OX=9606 GN=FOXK1 PE=1 SV=1	VC(BTD[C])EVGPK|||	1|||	1.98|||	NA|||	1.98	NA	1	1
Q13616	291	CUL1	CUL1_291	CUL1_HUMAN Cullin-1 OS=Homo sapiens OX=9606 GN=CUL1 PE=1 SV=2	||KC(BTD[C])EQVLIEK|KC(BTD[C])EQVLIEK	||2|2	||1.91|2.06	||0.02828|0.43841	1.99	0.11	4	2
P68104	411	EEF1A1	EEF1A1_411	EF1A1_HUMAN Elongation factor 1-alpha 1 OS=Homo sapiens OX=9606 GN=EEF1A1 PE=1 SV=1	SGDAAIVDMVPGKPMC(BTD[C])VESFSDYPPLGR||PMC(BTD[C])VESFSDYPPLGR|	1||1|	3.13||0.86|	NA||NA|	2	1.61	2	2
Q9Y2T3	59	GDA	GDA_59	GUAD_HUMAN Guanine deaminase OS=Homo sapiens OX=9606 GN=GDA PE=1 SV=1	WC(BTD[C])FKPCEIR|||	1|||	2.0|||	NA|||	2	NA	1	1
P55060	61	CSE1L	CSE1L_61	XPO2_HUMAN Exportin-2 OS=Homo sapiens OX=9606 GN=CSE1L PE=1 SV=3	|VC(BTD[C])ASVTFK||	|1||	|2.0||	|NA||	2	NA	1	1
O00273	47	DFFA	DFFA_47	DFFA_HUMAN DNA fragmentation factor subunit alpha OS=Homo sapiens OX=9606 GN=DFFA PE=1 SV=1	||AC(BTD[C])DILAIDK|	||1|	||2.0|	||NA|	2	NA	1	1
Q16762	248	TST	TST_248	THTR_HUMAN Thiosulfate sulfurtransferase OS=Homo sapiens OX=9606 GN=TST PE=1 SV=4	KVDLSQPLIATC(BTD[C])R|KVDLSQPLIATC(BTD[C])R VDLSQPLIATC(BTD[C])R||VDLSQPLIATC(BTD[C])R	1|2||1	2.53|2.015||1.46	NA|0.68589||NA	2	0.54	4	3	Active site
Q14847	29	LASP1	LASP1_29	LASP1_HUMAN LIM and SH3 domain protein 1 OS=Homo sapiens OX=9606 GN=LASP1 PE=1 SV=2	|AC(BTD[C])FHCETCK|AC(BTD[C])FHCETCK|AC(BTD[C])FHCETCK	|1|2|2	|1.61|2.17|2.29	|NA|0.0|0.0	2.02	0.36	5	3
Q9Y315	182	DERA	DERA_182	DEOC_HUMAN Deoxyribose-phosphate aldolase OS=Homo sapiens OX=9606 GN=DERA PE=1 SV=2	AC(BTD[C])GEAHLK|AC(BTD[C])GEAHLK|AC(BTD[C])GEAHLK|	2|2|1|	2.175|2.105|1.86|	0.00707|0.19092|NA|	2.05	0.17	5	3
P49915	631	GMPS	GMPS_631	GUAA_HUMAN GMP synthase [glutamine-hydrolyzing] OS=Homo sapiens OX=9606 GN=GMPS PE=1 SV=1	|QPSC(BTD[C])QR|QPSC(BTD[C])QR|QPSC(BTD[C])QR	|1|2|1	|1.81|3.77|0.59	|NA|4.6669|NA	2.06	1.6	4	3
O00232	74	PSMD12	PSMD12_74	PSD12_HUMAN 26S proteasome non-ATPase regulatory subunit 12 OS=Homo sapiens OX=9606 GN=PSMD12 PE=1 SV=3	||MC(BTD[C])YEAK|	||1|	||2.06|	||NA|	2.06	NA	1	1
O60232	187	ZNRD2	ZNRD2_187	ZNRD2_HUMAN Protein ZNRD2 OS=Homo sapiens OX=9606 GN=ZNRD2 PE=1 SV=1	||AC(BTD[C])AEALR|AC(BTD[C])AEALR	||1|2	||2.29|1.86	||NA|0.19799	2.08	0.3	3	2
P78527	223	PRKDC	PRKDC_223	PRKDC_HUMAN DNA-dependent protein kinase catalytic subunit OS=Homo sapiens OX=9606 GN=PRKDC PE=1 SV=3	LPVLAGC(BTD[C])LK|||LPVLAGC(BTD[C])LK	1|||1	2.39|||1.77	NA|||NA	2.08	0.44	2	2
P35998	236	PSMC2	PSMC2_236	PRS7_HUMAN 26S proteasome regulatory subunit 7 OS=Homo sapiens OX=9606 GN=PSMC2 PE=1 SV=3	TDAC(BTD[C])FIR|TDAC(BTD[C])FIR||TDAC(BTD[C])FIR	1|2||1	1.82|1.305||3.13	NA|0.50205||NA	2.09	0.94	4	3
P34932	270	HSPA4	HSPA4_270	HSP74_HUMAN Heat shock 70 kDa protein 4 OS=Homo sapiens OX=9606 GN=HSPA4 PE=1 SV=4	||LSQEC(BTD[C])EK|	||1|	||2.09|	||NA|	2.09	NA	1	1
P05023	705	ATP1A1	ATP1A1_705	AT1A1_HUMAN Sodium/potassium-transporting ATPase subunit alpha-1 OS=Homo sapiens OX=9606 GN=ATP1A1 PE=1 SV=1	LIIVEGC(BTD[C])QR|LIIVEGC(BTD[C])QR||LIIVEGC(BTD[C])QR	2|2||1	1.8|1.52||2.96	0.0|0.0||NA	2.09	0.76	5	3
O00571	223	DDX3X	DDX3X_223	DDX3X_HUMAN ATP-dependent RNA helicase DDX3X OS=Homo sapiens OX=9606 GN=DDX3X PE=1 SV=3	|||DLMAC(BTD[C])AQTGSGK	|||1	|||2.1	|||NA	2.1	NA	1	1
P52701	1098	MSH6	MSH6_1098	MSH6_HUMAN DNA mismatch repair protein Msh6 OS=Homo sapiens OX=9606 GN=MSH6 PE=1 SV=2	HPC(BTD[C])ITK|||	1|||	2.11|||	NA|||	2.11	NA	1	1
P62633	111	CNBP	CNBP_111	CNBP_HUMAN Cellular nucleic acid-binding protein OS=Homo sapiens OX=9606 GN=CNBP PE=1 SV=1	||DC(BTD[C])DHADEQK|	||1|	||2.11|	||NA|	2.11	NA	1	1
Q96DV4	143	MRPL38	MRPL38_143	RM38_HUMAN 39S ribosomal protein L38, mitochondrial OS=Homo sapiens OX=9606 GN=MRPL38 PE=1 SV=2	|TC(BTD[C])GPYHK||TC(BTD[C])GPYHK	|1||1	|1.79||2.48	|NA||NA	2.14	0.49	2	2
P21333	2160	FLNA	FLNA_2160	FLNA_HUMAN Filamin-A OS=Homo sapiens OX=9606 GN=FLNA PE=1 SV=4	APSVANVGSHC(BTD[C])DLSLK|||	1|||	2.14|||	NA|||	2.14	NA	1	1
Q15363	93	TMED2	TMED2_93	TMED2_HUMAN Transmembrane emp24 domain-containing protein 2 OS=Homo sapiens OX=9606 GN=TMED2 PE=1 SV=1	FC(BTD[C])FSNR|||	1|||	2.14|||	NA|||	2.14	NA	1	1
P49748	237	ACADVL	ACADVL_237	ACADV_HUMAN Very long-chain specific acyl-CoA dehydrogenase, mitochondrial OS=Homo sapiens OX=9606 GN=ACADVL PE=1 SV=1	|TSAVPSPC(BTD[C])GK|TSAVPSPC(BTD[C])GK|TSAVPSPC(BTD[C])GK	|1|2|2	|1.71|3.56|1.15	|NA|0.0|0.01414	2.14	1.26	5	3	Modified residue
P29144	28	TPP2	TPP2_28	TPP2_HUMAN Tripeptidyl-peptidase 2 OS=Homo sapiens OX=9606 GN=TPP2 PE=1 SV=4	|KETGAASFLC(BTD[C])R||	|1||	|2.15||	|NA||	2.15	NA	1	1
P31327	816	CPS1	CPS1_816	CPSM_HUMAN Carbamoyl-phosphate synthase [ammonia], mitochondrial OS=Homo sapiens OX=9606 GN=CPS1 PE=1 SV=2	MC(BTD[C])HPSIEGFTPR|||	1|||	2.16|||	NA|||	2.16	NA	1	1
P61962	256	DCAF7	DCAF7_256	DCAF7_HUMAN DDB1- and CUL4-associated factor 7 OS=Homo sapiens OX=9606 GN=DCAF7 PE=1 SV=1	|||VPC(BTD[C])TPVAR	|||1	|||2.16	|||NA	2.16	NA	1	1
Q14974	543	KPNB1	KPNB1_543	IMB1_HUMAN Importin subunit beta-1 OS=Homo sapiens OX=9606 GN=KPNB1 PE=1 SV=2	NSAKDC(BTD[C])YPAVQK|||	1|||	2.17|||	NA|||	2.17	NA	1	1
P68036	86	UBE2L3	UBE2L3_86	UB2L3_HUMAN Ubiquitin-conjugating enzyme E2 L3 OS=Homo sapiens OX=9606 GN=UBE2L3 PE=1 SV=1	GQVC(BTD[C])LPVISAENWKPATK|GQVC(BTD[C])LPVISAENWKPATK||	1|1||	2.16|2.22||	NA|NA||	2.19	0.04	2	2	Active site
Q9Y2T3	170	GDA	GDA_170	GUAD_HUMAN Guanine deaminase OS=Homo sapiens OX=9606 GN=GDA PE=1 SV=1	||VC(BTD[C])MDLNDTFPEYK|	||1|	||2.19|	||NA|	2.19	NA	1	1
Q9BSD7	110	NTPCR	NTPCR_110	NTPCR_HUMAN Cancer-related nucleoside-triphosphatase OS=Homo sapiens OX=9606 GN=NTPCR PE=1 SV=1	||VC(BTD[C])VIDEIGK|	||2|	||2.19|	||0.0|	2.19	NA	2	1
Q9NR45	46	NANS	NANS_46	SIAS_HUMAN Sialic acid synthase OS=Homo sapiens OX=9606 GN=NANS PE=1 SV=2	||EC(BTD[C])GADCAK|EC(BTD[C])GADCAK	||1|1	||2.07|2.35	||NA|NA	2.21	0.2	2	2
Q13433	303	SLC39A6	SLC39A6_303	S39A6_HUMAN Zinc transporter ZIP6 OS=Homo sapiens OX=9606 GN=SLC39A6 PE=1 SV=3	SC(BTD[C])LIHTSEK|||SC(BTD[C])LIHTSEK	1|||1	2.35|||2.11	NA|||NA	2.23	0.17	2	2
P22102	41	GART	GART_41	PUR2_HUMAN Trifunctional purine biosynthetic protein adenosine-3 OS=Homo sapiens OX=9606 GN=GART PE=1 SV=1	|LVAPGNAGTAC(BTD[C])SEK||	|1||	|2.23||	|NA||	2.23	NA	1	1
P20810	413	CAST	CAST_413	ICAL_HUMAN Calpastatin OS=Homo sapiens OX=9606 GN=CAST PE=1 SV=4	||TSMC(BTD[C])SIQSAPPEPATLK|TSMC(BTD[C])SIQSAPPEPATLK	||1|1	||2.3|2.16	||NA|NA	2.23	0.1	2	2
P25205	360	MCM3	MCM3_360	MCM3_HUMAN DNA replication licensing factor MCM3 OS=Homo sapiens OX=9606 GN=MCM3 PE=1 SV=3	YVLC(BTD[C])TAPR||YVLC(BTD[C])TAPR|	1||1|	3.52||0.98|	NA||NA|	2.25	1.8	2	2
P49721	163	PSMB2	PSMB2_163	PSB2_HUMAN Proteasome subunit beta type-2 OS=Homo sapiens OX=9606 GN=PSMB2 PE=1 SV=1	KC(BTD[C])LEELQK|||KC(BTD[C])LEELQK	1|||1	2.07|||2.45	NA|||NA	2.26	0.27	2	2
P23396	134	RPS3	RPS3_134	RS3_HUMAN 40S ribosomal protein S3 OS=Homo sapiens OX=9606 GN=RPS3 PE=1 SV=2	|GC(BTD[C])EVVVSGK|GC(BTD[C])EVVVSGK|GC(BTD[C])EVVVSGK	|2|1|2	|1.84|2.54|2.41	|0.0|NA|0.01414	2.26	0.37	5	3
Q96AE4	148	FUBP1	FUBP1_148	FUBP1_HUMAN Far upstream element-binding protein 1 OS=Homo sapiens OX=9606 GN=FUBP1 PE=1 SV=3	||SC(BTD[C])MLTGTPESVQSAK|SC(BTD[C])MLTGTPESVQSAK	||4|2	||2.45|2.11	||0.43821|0.3677	2.28	0.24	6	2
O75131	385	CPNE3	CPNE3_385	CPNE3_HUMAN Copine-3 OS=Homo sapiens OX=9606 GN=CPNE3 PE=1 SV=1	||SC(BTD[C])LPQIK|	||1|	||2.28|	||NA|	2.28	NA	1	1
P00491	78	PNP	PNP_78	PNPH_HUMAN Purine nucleoside phosphorylase OS=Homo sapiens OX=9606 GN=PNP PE=1 SV=2	||AC(BTD[C])VMMQGR|AC(BTD[C])VMMQGR	||3|4	||1.89|2.68	||0.48809|0.41513	2.29	0.56	7	2
O75410	794	TACC1	TACC1_794	TACC1_HUMAN Transforming acidic coiled-coil-containing protein 1 OS=Homo sapiens OX=9606 GN=TACC1 PE=1 SV=2	|||IC(BTD[C])DELIAK	|||1	|||2.29	|||NA	2.29	NA	1	1
P10620	50	MGST1	MGST1_50	MGST1_HUMAN Microsomal glutathione S-transferase 1 OS=Homo sapiens OX=9606 GN=MGST1 PE=1 SV=1	VFANPEDC(BTD[C])VAFGK|||	1|||	2.3|||	NA|||	2.3	NA	1	1
P62495	302	ETF1	ETF1_302	ERF1_HUMAN Eukaryotic peptide chain release factor subunit 1 OS=Homo sapiens OX=9606 GN=ETF1 PE=1 SV=3	||YC(BTD[C])FGVEDTLK|	||1|	||2.3|	||NA|	2.3	NA	1	1
Q16851	123	UGP2	UGP2_123	UGPA_HUMAN UTP--glucose-1-phosphate uridylyltransferase OS=Homo sapiens OX=9606 GN=UGP2 PE=1 SV=5	LNGGLGTSMGC(BTD[C])K|||	1|||	2.31|||	NA|||	2.31	NA	1	1
Q16836	211	HADH	HADH_211	HCDH_HUMAN Hydroxyacyl-coenzyme A dehydrogenase, mitochondrial OS=Homo sapiens OX=9606 GN=HADH PE=1 SV=3	HPVSC(BTD[C])K|HPVSC(BTD[C])K||	1|1||	2.39|2.28||	NA|NA||	2.34	0.08	2	2
Q9BZG1	67	RAB34	RAB34_67	RAB34_HUMAN Ras-related protein Rab-34 OS=Homo sapiens OX=9606 GN=RAB34 PE=1 SV=1	|||TC(BTD[C])LINR	|||1	|||2.34	|||NA	2.34	NA	1	1
Q9NWD8	305	TMEM248	TMEM248_305	TM248_HUMAN Transmembrane protein 248 OS=Homo sapiens OX=9606 GN=TMEM248 PE=1 SV=1	||QSNPEFC(BTD[C])PEK|	||1|	||2.35|	||NA|	2.35	NA	1	1
Q8WUY1	29	THEM6	THEM6_29	THEM6_HUMAN Protein THEM6 OS=Homo sapiens OX=9606 GN=THEM6 PE=1 SV=2	|LPC(BTD[C])AVLR||	|1||	|2.36||	|NA||	2.36	NA	1	1
P07437	303	TUBB	TUBB_303	TBB5_HUMAN Tubulin beta chain OS=Homo sapiens OX=9606 GN=TUBB PE=1 SV=2	||NMMAAC(BTD[C])DPR|	||1|	||2.36|	||NA|	2.36	NA	1	1
Q9HA64	24	FN3KRP	FN3KRP_24	KT3K_HUMAN Ketosamine-3-kinase OS=Homo sapiens OX=9606 GN=FN3KRP PE=1 SV=2	||TGHSGGGC(BTD[C])ISQGR|TGHSGGGC(BTD[C])ISQGR	||1|1	||2.46|2.27	||NA|NA	2.37	0.13	2	2
Q9H2G2	1212	SLK	SLK_1212	SLK_HUMAN STE20-like serine/threonine-protein kinase OS=Homo sapiens OX=9606 GN=SLK PE=1 SV=1	||MTGESEC(BTD[C])LNPSTQSR|	||1|	||2.37|	||NA|	2.37	NA	1	1
P61247	111	RPS3A	RPS3A_111	RS3A_HUMAN 40S ribosomal protein S3a OS=Homo sapiens OX=9606 GN=RPS3A PE=1 SV=2	|||MC(BTD[C])SMVK	|||2	|||2.37	|||0.0	2.37	NA	2	1
P46782	66	RPS5	RPS5_66	RS5_HUMAN 40S ribosomal protein S5 OS=Homo sapiens OX=9606 GN=RPS5 PE=1 SV=4	KAQC(BTD[C])PIVER|KAQC(BTD[C])PIVER AQC(BTD[C])PIVER|KAQC(BTD[C])PIVER AQC(BTD[C])PIVER|KAQC(BTD[C])PIVER AQC(BTD[C])PIVER	5|6|7|6	3.02|1.8|2.36|2.305	0.18019|0.85854|0.21447|0.35282	2.37	0.5	24	4
P20618	224	PSMB1	PSMB1_224	PSB1_HUMAN Proteasome subunit beta type-1 OS=Homo sapiens OX=9606 GN=PSMB1 PE=1 SV=2	IC(BTD[C])IVTK|IC(BTD[C])IVTK|IC(BTD[C])IVTK|IC(BTD[C])IVTK	1|1|3|1	1.86|1.87|2.77|2.99	NA|NA|0.14434|NA	2.37	0.59	6	4
P51003	36	PAPOLA	PAPOLA_36	PAPOA_HUMAN Poly(A) polymerase alpha OS=Homo sapiens OX=9606 GN=PAPOLA PE=1 SV=4	|||TDC(BTD[C])VLTQK	|||1	|||2.38	|||NA	2.38	NA	1	1
P11766	282	ADH5	ADH5_282	ADHX_HUMAN Alcohol dehydrogenase class-3 OS=Homo sapiens OX=9606 GN=ADH5 PE=1 SV=4	||AALEAC(BTD[C])HK|	||1|	||2.39|	||NA|	2.39	NA	1	1
Q8IWW8	77	ADHFE1	ADHFE1_77	HOT_HUMAN Hydroxyacid-oxoacid transhydrogenase, mitochondrial OS=Homo sapiens OX=9606 GN=ADHFE1 PE=1 SV=1	|||NVC(BTD[C])LMTDK	|||1	|||2.4	|||NA	2.4	NA	1	1
P29144	710	TPP2	TPP2_710	TPP2_HUMAN Tripeptidyl-peptidase 2 OS=Homo sapiens OX=9606 GN=TPP2 PE=1 SV=4	||FC(BTD[C])SLPEK|FC(BTD[C])SLPEK	||2|2	||2.38|2.43	||0.0|0.0	2.41	0.04	4	2
Q00839	335	HNRNPU	HNRNPU_335	HNRPU_HUMAN Heterogeneous nuclear ribonucleoprotein U OS=Homo sapiens OX=9606 GN=HNRNPU PE=1 SV=6	||VC(BTD[C])FEMK|	||1|	||2.41|	||NA|	2.41	NA	1	1
P05023	663	ATP1A1	ATP1A1_663	AT1A1_HUMAN Sodium/potassium-transporting ATPase subunit alpha-1 OS=Homo sapiens OX=9606 GN=ATP1A1 PE=1 SV=1	|AC(BTD[C])VVHGSDLK|AC(BTD[C])VVHGSDLK|AC(BTD[C])VVHGSDLK	|2|1|3	|2.595|2.87|1.78	|1.16673|NA|1.37409	2.42	0.57	6	3
P31948	339	STIP1	STIP1_339	STIP1_HUMAN Stress-induced-phosphoprotein 1 OS=Homo sapiens OX=9606 GN=STIP1 PE=1 SV=1	|KC(BTD[C])QQAEK|KC(BTD[C])QQAEK|KC(BTD[C])QQAEK	|1|1|1	|3.95|1.93|1.4	|NA|NA|NA	2.43	1.35	3	3
Q6UXN9	195	WDR82	WDR82_195	WDR82_HUMAN WD repeat-containing protein 82 OS=Homo sapiens OX=9606 GN=WDR82 PE=1 SV=1	||TC(BTD[C])EWTGLK|	||1|	||2.43|	||NA|	2.43	NA	1	1
O95347	326	SMC2	SMC2_326	SMC2_HUMAN Structural maintenance of chromosomes protein 2 OS=Homo sapiens OX=9606 GN=SMC2 PE=1 SV=2	NLAC(BTD[C])EESK|NLAC(BTD[C])EESK||	1|1||	2.21|2.67||	NA|NA||	2.44	0.33	2	2
P40222	373	TXLNA	TXLNA_373	TXLNA_HUMAN Alpha-taxilin OS=Homo sapiens OX=9606 GN=TXLNA PE=1 SV=3	||MC(BTD[C])ELMK|MC(BTD[C])ELMK	||1|1	||2.26|2.63	||NA|NA	2.45	0.26	2	2
P53618	143	COPB1	COPB1_143	COPB_HUMAN Coatomer subunit beta OS=Homo sapiens OX=9606 GN=COPB1 PE=1 SV=3	|AC(BTD[C])LEHR||	|1||	|2.45||	|NA||	2.45	NA	1	1
P63279	75	UBE2I	UBE2I_75	UBC9_HUMAN SUMO-conjugating enzyme UBC9 OS=Homo sapiens OX=9606 GN=UBE2I PE=1 SV=1	||DDYPSSPPKC(BTD[C])K|	||1|	||2.45|	||NA|	2.45	NA	1	1
Q9H2A2	287	ALDH8A1	ALDH8A1_287	AL8A1_HUMAN 2-aminomuconic semialdehyde dehydrogenase OS=Homo sapiens OX=9606 GN=ALDH8A1 PE=1 SV=1	||SSFANQGEIC(BTD[C])LCTSR|	||1|	||2.45|	||NA|	2.45	NA	1	1	Active site
P31930	380	UQCRC1	UQCRC1_380	QCR1_HUMAN Cytochrome b-c1 complex subunit 1, mitochondrial OS=Homo sapiens OX=9606 GN=UQCRC1 PE=1 SV=3	||LC(BTD[C])TSATESEVAR|LC(BTD[C])TSATESEVAR	||2|2	||2.745|2.16	||0.14849|0.41012	2.45	0.41	4	2
A1L0T0	176	ILVBL	ILVBL_176	ILVBL_HUMAN Acetolactate synthase-like protein OS=Homo sapiens OX=9606 GN=ILVBL PE=1 SV=2	FC(BTD[C])VSVR|||FC(BTD[C])VSVR	1|||1	2.9|||2.02	NA|||NA	2.46	0.62	2	2
A0AVT1	178	UBA6	UBA6_178	UBA6_HUMAN Ubiquitin-like modifier-activating enzyme 6 OS=Homo sapiens OX=9606 GN=UBA6 PE=1 SV=1	SQC(BTD[C])PPIK|||	1|||	2.47|||	NA|||	2.47	NA	1	1
Q9UL26	9	RAB22A	RAB22A_9	RB22A_HUMAN Ras-related protein Rab-22A OS=Homo sapiens OX=9606 GN=RAB22A PE=1 SV=2	||VC(BTD[C])LLGDTGVGK|	||1|	||2.47|	||NA|	2.47	NA	1	1
P42704	130	LRPPRC	LRPPRC_130	LPPRC_HUMAN Leucine-rich PPR motif-containing protein, mitochondrial OS=Homo sapiens OX=9606 GN=LRPPRC PE=1 SV=3	||SC(BTD[C])GSLLPELK|	||1|	||2.48|	||NA|	2.48	NA	1	1
Q16658	80	FSCN1	FSCN1_80	FSCN1_HUMAN Fascin OS=Homo sapiens OX=9606 GN=FSCN1 PE=1 SV=3	|||YLAADKDGNVTC(BTD[C])ER	|||1	|||2.49	|||NA	2.49	NA	1	1
P08174	163	CD55	CD55_163	DAF_HUMAN Complement decay-accelerating factor OS=Homo sapiens OX=9606 GN=CD55 PE=1 SV=4	SC(BTD[C])PNPGEIR|SC(BTD[C])PNPGEIR|SC(BTD[C])PNPGEIR|	1|1|2|	2.54|2.59|2.385|	NA|NA|0.54447|	2.51	0.11	4	3	Disulfide bond
P46940	1534	IQGAP1	IQGAP1_1534	IQGA1_HUMAN Ras GTPase-activating-like protein IQGAP1 OS=Homo sapiens OX=9606 GN=IQGAP1 PE=1 SV=1	||TC(BTD[C])LDNLASK|	||1|	||2.51|	||NA|	2.51	NA	1	1
Q32MZ4	14	LRRFIP1	LRRFIP1_14	LRRF1_HUMAN Leucine-rich repeat flightless-interacting protein 1 OS=Homo sapiens OX=9606 GN=LRRFIP1 PE=1 SV=2	|||IDC(BTD[C])LSPEAQK	|||1	|||2.52	|||NA	2.52	NA	1	1
Q15020	486	SART3	SART3_486	SART3_HUMAN Squamous cell carcinoma antigen recognized by T-cells 3 OS=Homo sapiens OX=9606 GN=SART3 PE=1 SV=1	||LC(BTD[C])NNMQK|LC(BTD[C])NNMQK	||1|1	||2.36|2.69	||NA|NA	2.53	0.23	2	2
P61981	112	YWHAG	YWHAG_112	1433G_HUMAN 14-3-3 protein gamma OS=Homo sapiens OX=9606 GN=YWHAG PE=1 SV=2	|NC(BTD[C])SETQYESK||NC(BTD[C])SETQYESK	|1||1	|2.34||2.72	|NA||NA	2.53	0.27	2	2
Q96QK1	286	VPS35	VPS35_286	VPS35_HUMAN Vacuolar protein sorting-associated protein 35 OS=Homo sapiens OX=9606 GN=VPS35 PE=1 SV=2	AC(BTD[C])AELHQNVNVK|AC(BTD[C])AELHQNVNVK|AC(BTD[C])AELHQNVNVK|AC(BTD[C])AELHQNVNVK	3|1|1|2	3.05|1.99|2.89|2.21	0.16442|NA|NA|0.0	2.54	0.51	7	4
Q14934	688	NFATC4	NFATC4_688	NFAC4_HUMAN Nuclear factor of activated T-cells, cytoplasmic 4 OS=Homo sapiens OX=9606 GN=NFATC4 PE=1 SV=2	FLPVIC(BTD[C])K|FLPVIC(BTD[C])K||	1|1||	2.58|2.49||	NA|NA||	2.54	0.06	2	2
Q86VP6	264	CAND1	CAND1_264	CAND1_HUMAN Cullin-associated NEDD8-dissociated protein 1 OS=Homo sapiens OX=9606 GN=CAND1 PE=1 SV=2	||FC(BTD[C])NVDDDELR|	||1|	||2.54|	||NA|	2.54	NA	1	1
P62888	52	RPL30	RPL30_52	RL30_HUMAN 60S ribosomal protein L30 OS=Homo sapiens OX=9606 GN=RPL30 PE=1 SV=2	|LANNC(BTD[C])PALR||ANNC(BTD[C])PALR	|1||1	|1.75||3.34	|NA||NA	2.55	1.12	2	2
Q8IYS1	14	PM20D2	PM20D2_14	P20D2_HUMAN Peptidase M20 domain-containing protein 2 OS=Homo sapiens OX=9606 GN=PM20D2 PE=1 SV=2	|MRPGGERPVEGGAC(BTD[C])NGR||	|1||	|2.55||	|NA||	2.55	NA	1	1
O43347	167	MSI1	MSI1_167	MSI1H_HUMAN RNA-binding protein Musashi homolog 1 OS=Homo sapiens OX=9606 GN=MSI1 PE=1 SV=1	|VC(BTD[C])EIHFHEINNK||	|1||	|2.55||	|NA||	2.55	NA	1	1
Q01844	384	EWSR1	EWSR1_384	EWS_HUMAN RNA-binding protein EWS OS=Homo sapiens OX=9606 GN=EWSR1 PE=1 SV=1	||QC(BTD[C])GVVK|QC(BTD[C])GVVK	||2|2	||2.25|2.885	||0.76368|0.00707	2.57	0.45	4	2
P63010	857	AP2B1	AP2B1_857	AP2B1_HUMAN AP-2 complex subunit beta OS=Homo sapiens OX=9606 GN=AP2B1 PE=1 SV=1	||EC(BTD[C])HLNADTVSSK|EC(BTD[C])HLNADTVSSK	||2|1	||2.72|2.42	||0.09899|NA	2.57	0.21	3	2
P43304	45	GPD2	GPD2_45	GPDM_HUMAN Glycerol-3-phosphate dehydrogenase, mitochondrial OS=Homo sapiens OX=9606 GN=GPD2 PE=1 SV=3	||AADC(BTD[C])ISEPVNR|	||1|	||2.57|	||NA|	2.57	NA	1	1
P04040	460	CAT	CAT_460	CATA_HUMAN Catalase OS=Homo sapiens OX=9606 GN=CAT PE=1 SV=3	RLC(BTD[C])ENIAGHLK LC(BTD[C])ENIAGHLK|LC(BTD[C])ENIAGHLK|RLC(BTD[C])ENIAGHLK LC(BTD[C])ENIAGHLK|RLC(BTD[C])ENIAGHLK LC(BTD[C])ENIAGHLK	6|4|6|4	2.215|2.2|2.975|2.91	2.04776|0.67384|0.84646|0.29262	2.58	0.43	20	4
P56537	63	EIF6	EIF6_63	IF6_HUMAN Eukaryotic translation initiation factor 6 OS=Homo sapiens OX=9606 GN=EIF6 PE=1 SV=1	|||MC(BTD[C])VGNR	|||1	|||2.58	|||NA	2.58	NA	1	1
Q13263	232	TRIM28	TRIM28_232	TIF1B_HUMAN Transcription intermediary factor 1-beta OS=Homo sapiens OX=9606 GN=TRIM28 PE=1 SV=5	|DC(BTD[C])QLNAHK|DC(BTD[C])QLNAHK|DC(BTD[C])QLNAHK	|1|1|1	|3.22|2.43|2.19	|NA|NA|NA	2.61	0.54	3	3
O95373	736	IPO7	IPO7_736	IPO7_HUMAN Importin-7 OS=Homo sapiens OX=9606 GN=IPO7 PE=1 SV=1	VLTGVAGEDAEC(BTD[C])HAAK||VLTGVAGEDAEC(BTD[C])HAAK|	1||1|	2.77||2.46|	NA||NA|	2.62	0.22	2	2
P04843	545	RPN1	RPN1_545	RPN1_HUMAN Dolichyl-diphosphooligosaccharide--protein glycosyltransferase subunit 1 OS=Homo sapiens OX=9606 GN=RPN1 PE=1 SV=1	||LKTEGSDLC(BTD[C])DR TEGSDLC(BTD[C])DR|LKTEGSDLC(BTD[C])DR TEGSDLC(BTD[C])DR	||2|2	||1.0|4.235	||0.48083|4.39113	2.62	2.29	4	2
Q86VP6	954	CAND1	CAND1_954	CAND1_HUMAN Cullin-associated NEDD8-dissociated protein 1 OS=Homo sapiens OX=9606 GN=CAND1 PE=1 SV=2	|||NVVAEC(BTD[C])LGK	|||2	|||2.625	|||0.09192	2.63	NA	2	1
Q99424	412	ACOX2	ACOX2_412	ACOX2_HUMAN Peroxisomal acyl-coenzyme A oxidase 2 OS=Homo sapiens OX=9606 GN=ACOX2 PE=1 SV=1	AC(BTD[C])GGHGYSK||AC(BTD[C])GGHGYSK|AC(BTD[C])GGHGYSK	2||3|3	2.225||3.01|2.74	0.07778||0.04619|0.06928	2.66	0.4	8	3
Q8NCA5	292	FAM98A	FAM98A_292	FA98A_HUMAN Protein FAM98A OS=Homo sapiens OX=9606 GN=FAM98A PE=1 SV=2	TAC(BTD[C])AINK|TAC(BTD[C])AINK||	1|1||	3.01|2.39||	NA|NA||	2.7	0.44	2	2
Q06278	1103	AOX1	AOX1_1103	AOXA_HUMAN Aldehyde oxidase OS=Homo sapiens OX=9606 GN=AOX1 PE=1 SV=2	|||DAC(BTD[C])QTLLK	|||2	|||2.72	|||0.0	2.72	NA	2	1
P30566	304	ADSL	ADSL_304	PUR8_HUMAN Adenylosuccinate lyase OS=Homo sapiens OX=9606 GN=ADSL PE=1 SV=2	||SERC(BTD[C])CSLAR|	||2|	||2.73|	||0.08485|	2.73	NA	2	1
P09960	543	LTA4H	LTA4H_543	LKHA4_HUMAN Leukotriene A-4 hydrolase OS=Homo sapiens OX=9606 GN=LTA4H PE=1 SV=2	|||LC(BTD[C])IQSK	|||2	|||2.73	|||0.0	2.73	NA	2	1
P00558	367	PGK1	PGK1_367	PGK1_HUMAN Phosphoglycerate kinase 1 OS=Homo sapiens OX=9606 GN=PGK1 PE=1 SV=3	||GC(BTD[C])ITIIGGGDTATCCAK|GC(BTD[C])ITIIGGGDTATCCAK	||2|1	||2.76|2.74	||0.11314|NA	2.75	0.01	3	2
P62826	112	RAN	RAN_112	RAN_HUMAN GTP-binding nuclear protein Ran OS=Homo sapiens OX=9606 GN=RAN PE=1 SV=3	VC(BTD[C])ENIPIVLCGNK|||VC(BTD[C])ENIPIVLCGNK	3|||2	2.76|||2.76	0.43301|||0.0	2.76	0	5	2
P22314	444	UBA1	UBA1_444	UBA1_HUMAN Ubiquitin-like modifier-activating enzyme 1 OS=Homo sapiens OX=9606 GN=UBA1 PE=1 SV=3	|EVLTEDKC(BTD[C])LQR||	|1||	|2.76||	|NA||	2.76	NA	1	1
P49915	554	GMPS	GMPS_554	GUAA_HUMAN GMP synthase [glutamine-hydrolyzing] OS=Homo sapiens OX=9606 GN=GMPS PE=1 SV=1	||MC(BTD[C])HNVNR|MC(BTD[C])HNVNR	||3|2	||2.77|2.75	||0.05196|0.08485	2.76	0.01	5	2
P17844	354	DDX5	DDX5_354	DDX5_HUMAN Probable ATP-dependent RNA helicase DDX5 OS=Homo sapiens OX=9606 GN=DDX5 PE=1 SV=1	|||RC(BTD[C])DELTR	|||1	|||2.76	|||NA	2.76	NA	1	1
Q9UJX3	329	ANAPC7	ANAPC7_329	APC7_HUMAN Anaphase-promoting complex subunit 7 OS=Homo sapiens OX=9606 GN=ANAPC7 PE=1 SV=4	||LEDVENLGC(BTD[C])R|	||1|	||2.77|	||NA|	2.77	NA	1	1
P06733	337	ENO1	ENO1_337	ENOA_HUMAN Alpha-enolase OS=Homo sapiens OX=9606 GN=ENO1 PE=1 SV=2	SC(BTD[C])NCLLLK|SC(BTD[C])NCLLLK|SC(BTD[C])NCLLLK|SC(BTD[C])NCLLLK	2|2|3|2	3.08|2.235|2.79|3.005	0.0|1.15258|0.07638|0.0495	2.78	0.38	9	4
O75891	707	ALDH1L1	ALDH1L1_707	AL1L1_HUMAN Cytosolic 10-formyltetrahydrofolate dehydrogenase OS=Homo sapiens OX=9606 GN=ALDH1L1 PE=1 SV=2	GENC(BTD[C])IAAGR|GENC(BTD[C])IAAGR|GENC(BTD[C])IAAGR|GENC(BTD[C])IAAGR	1|1|2|2	4.04|3.33|1.72|2.025	NA|NA|0.3677|0.00707	2.78	1.09	6	4	Active site
P17987	147	TCP1	TCP1_147	TCPA_HUMAN T-complex protein 1 subunit alpha OS=Homo sapiens OX=9606 GN=TCP1 PE=1 SV=1	||DC(BTD[C])LINAAK|DC(BTD[C])LINAAK	||2|2	||2.88|2.69	||0.11314|0.0	2.79	0.13	4	2
P38646	366	HSPA9	HSPA9_366	GRP75_HUMAN Stress-70 protein, mitochondrial OS=Homo sapiens OX=9606 GN=HSPA9 PE=1 SV=2	TIAPC(BTD[C])QK|||TIAPC(BTD[C])QK	1|||2	2.13|||3.45	NA|||0.73539	2.79	0.93	3	2
Q9NVI7	563	ATAD3A	ATAD3A_563	ATD3A_HUMAN ATPase family AAA domain-containing protein 3A OS=Homo sapiens OX=9606 GN=ATAD3A PE=1 SV=2	|KC(BTD[C])SEVAR|KC(BTD[C])SEVAR|KC(BTD[C])SEVAR	|2|1|1	|3.47|2.68|2.22	|0.09899|NA|NA	2.79	0.63	4	3
P05141	160	SLC25A5	SLC25A5_160	ADT2_HUMAN ADP/ATP translocase 2 OS=Homo sapiens OX=9606 GN=SLC25A5 PE=1 SV=7	|GLGDC(BTD[C])LVK||GLGDC(BTD[C])LVK	|1||1	|2.86||2.72	|NA||NA	2.79	0.1	2	2
P04040	232	CAT	CAT_232	CATA_HUMAN Catalase OS=Homo sapiens OX=9606 GN=CAT PE=1 SV=3	LVNANGEAVYC(BTD[C])K|LVNANGEAVYC(BTD[C])K|LVNANGEAVYC(BTD[C])K|LVNANGEAVYC(BTD[C])K	1|2|2|2	3.38|2.75|2.72|2.33	NA|0.11314|3.56382|3.01227	2.8	0.43	7	4
P40227	282	CCT6A	CCT6A_282	TCPZ_HUMAN T-complex protein 1 subunit zeta OS=Homo sapiens OX=9606 GN=CCT6A PE=1 SV=3	|KVC(BTD[C])GDSDK|KVC(BTD[C])GDSDK|VC(BTD[C])GDSDK	|1|2|2	|3.45|2.19|2.81	|NA|2.23446|0.0	2.82	0.63	5	3
P36873	127	PPP1CC	PPP1CC_127	PP1G_HUMAN Serine/threonine-protein phosphatase PP1-gamma catalytic subunit OS=Homo sapiens OX=9606 GN=PPP1CC PE=1 SV=1	||GNHEC(BTD[C])ASINR|	||1|	||2.82|	||NA|	2.82	NA	1	1
P11498	265	PC	PC_265	PYC_HUMAN Pyruvate carboxylase, mitochondrial OS=Homo sapiens OX=9606 GN=PC PE=1 SV=2	|||DC(BTD[C])SIQR	|||1	|||2.82	|||NA	2.82	NA	1	1
P23193	271	TCEA1	TCEA1_271	TCEA1_HUMAN Transcription elongation factor A protein 1 OS=Homo sapiens OX=9606 GN=TCEA1 PE=1 SV=2	||NC(BTD[C])TYTQVQTR|	||1|	||2.83|	||NA|	2.83	NA	1	1
P51812	560	RPS6KA3	RPS6KA3_560	KS6A3_HUMAN Ribosomal protein S6 kinase alpha-3 OS=Homo sapiens OX=9606 GN=RPS6KA3 PE=1 SV=1	|||IC(BTD[C])DFGFAK	|||1	|||2.83	|||NA	2.83	NA	1	1
Q9Y3C1	36	NOP16	NOP16_36	NOP16_HUMAN Nucleolar protein 16 OS=Homo sapiens OX=9606 GN=NOP16 PE=1 SV=2	IEC(BTD[C])SHIR|||	1|||	2.84|||	NA|||	2.84	NA	1	1
P52888	231	THOP1	THOP1_231	THOP1_HUMAN Thimet oligopeptidase OS=Homo sapiens OX=9606 GN=THOP1 PE=1 SV=2	|||KC(BTD[C])HVPETR	|||1	|||2.84	|||NA	2.84	NA	1	1
Q96TA1	466	NIBAN2	NIBAN2_466	NIBA2_HUMAN Protein Niban 2 OS=Homo sapiens OX=9606 GN=NIBAN2 PE=1 SV=3	GPTKEELC(BTD[C])K|||GPTKEELC(BTD[C])K	2|||1	2.385|||3.34	0.00707|||NA	2.86	0.68	3	2
P22234	266	PAICS	PAICS_266	PUR6_HUMAN Multifunctional protein ADE2 OS=Homo sapiens OX=9606 GN=PAICS PE=1 SV=3	|SESQC(BTD[C])R||	|1||	|2.87||	|NA||	2.87	NA	1	1
O75874	379	IDH1	IDH1_379	IDHC_HUMAN Isocitrate dehydrogenase [NADP] cytoplasmic OS=Homo sapiens OX=9606 GN=IDH1 PE=1 SV=2	||DLAAC(BTD[C])IK|	||1|	||2.87|	||NA|	2.87	NA	1	1
P30153	294	PPP2R1A	PPP2R1A_294	2AAA_HUMAN Serine/threonine-protein phosphatase 2A 65 kDa regulatory subunit A alpha isoform OS=Homo sapiens OX=9606 GN=PPP2R1A PE=1 SV=4	||DC(BTD[C])EAEVR|	||1|	||2.89|	||NA|	2.89	NA	1	1
P18206	545	VCL	VCL_545	VINC_HUMAN Vinculin OS=Homo sapiens OX=9606 GN=VCL PE=1 SV=4	||QDLLAKC(BTD[C])DR|QDLLAKC(BTD[C])DR	||1|1	||3.3|2.49	||NA|NA	2.9	0.57	2	2
P00558	50	PGK1	PGK1_50	PGK1_HUMAN Phosphoglycerate kinase 1 OS=Homo sapiens OX=9606 GN=PGK1 PE=1 SV=3	FC(BTD[C])LDNGAK||FC(BTD[C])LDNGAK|FC(BTD[C])LDNGAK	2||4|3	2.03||3.305|3.4	0.0||0.14245|0.07506	2.91	0.77	9	3
P23526	228	AHCY	AHCY_228	SAHH_HUMAN Adenosylhomocysteinase OS=Homo sapiens OX=9606 GN=AHCY PE=1 SV=4	GC(BTD[C])AQALR|GC(BTD[C])AQALR|GC(BTD[C])AQALR|GC(BTD[C])AQALR	1|1|2|2	3.05|2.89|3.195|2.565	NA|NA|0.17678|0.72832	2.93	0.27	6	4
Q9Y6K9	167	IKBKG	IKBKG_167	NEMO_HUMAN NF-kappa-B essential modulator OS=Homo sapiens OX=9606 GN=IKBKG PE=1 SV=2	||EC(BTD[C])QALEGR|	||2|	||2.96|	||0.0|	2.96	NA	2	1
Q14152	185	EIF3A	EIF3A_185	EIF3A_HUMAN Eukaryotic translation initiation factor 3 subunit A OS=Homo sapiens OX=9606 GN=EIF3A PE=1 SV=1	FC(BTD[C])LQYTR|||	1|||	2.98|||	NA|||	2.98	NA	1	1
P15880	229	RPS2	RPS2_229	RS2_HUMAN 40S ribosomal protein S2 OS=Homo sapiens OX=9606 GN=RPS2 PE=1 SV=2	GC(BTD[C])TATLGNFAK|GC(BTD[C])TATLGNFAK||	1|1||	3.27|2.7||	NA|NA||	2.99	0.4	2	2
P60891	165	PRPS1	PRPS1_165	PRPS1_HUMAN Ribose-phosphate pyrophosphokinase 1 OS=Homo sapiens OX=9606 GN=PRPS1 PE=1 SV=2	||NC(BTD[C])TIVSPDAGGAK|NC(BTD[C])TIVSPDAGGAK	||1|2	||2.1|3.88	||NA|0.07071	2.99	1.26	3	2
Q96AG4	48	LRRC59	LRRC59_48	LRC59_HUMAN Leucine-rich repeat-containing protein 59 OS=Homo sapiens OX=9606 GN=LRRC59 PE=1 SV=1	||ILDLSC(BTD[C])NK|ILDLSC(BTD[C])NK	||1|1	||2.72|3.26	||NA|NA	2.99	0.38	2	2
P52701	765	MSH6	MSH6_765	MSH6_HUMAN DNA mismatch repair protein Msh6 OS=Homo sapiens OX=9606 GN=MSH6 PE=1 SV=2	VDTC(BTD[C])HTPFGK|||	2|||	3.0|||	1.08894|||	3	NA	2	1
P08670	328	VIM	VIM_328	VIME_HUMAN Vimentin OS=Homo sapiens OX=9606 GN=VIM PE=1 SV=4	QVQSLTC(BTD[C])EVDALK||QVQSLTC(BTD[C])EVDALK|	2||1|	1.01||4.99|	0.0||NA|	3	2.81	3	2
P22314	179	UBA1	UBA1_179	UBA1_HUMAN Ubiquitin-like modifier-activating enzyme 1 OS=Homo sapiens OX=9606 GN=UBA1 PE=1 SV=3	VGEFC(BTD[C])HNR|VGEFC(BTD[C])HNR|VGEFC(BTD[C])HNR|VGEFC(BTD[C])HNR	1|2|1|1	3.89|3.005|2.36|2.77	NA|0.8556|NA|NA	3.01	0.65	5	4
O14818	91	PSMA7	PSMA7_91	PSA7_HUMAN Proteasome subunit alpha type-7 OS=Homo sapiens OX=9606 GN=PSMA7 PE=1 SV=1	VEC(BTD[C])QSHR||VEC(BTD[C])QSHR|VEC(BTD[C])QSHR	1||2|1	3.77||2.68|2.57	NA||0.0|NA	3.01	0.66	4	3
O75369	1952	FLNB	FLNB_1952	FLNB_HUMAN Filamin-B OS=Homo sapiens OX=9606 GN=FLNB PE=1 SV=2	||DEPC(BTD[C])LLK|	||2|	||3.01|	||0.0|	3.01	NA	2	1
P17980	240	PSMC3	PSMC3_240	PRS6A_HUMAN 26S proteasome regulatory subunit 6A OS=Homo sapiens OX=9606 GN=PSMC3 PE=1 SV=3	||AC(BTD[C])AAQTK|	||1|	||3.03|	||NA|	3.03	NA	1	1
P07437	12	TUBB	TUBB_12	TBB5_HUMAN Tubulin beta chain OS=Homo sapiens OX=9606 GN=TUBB PE=1 SV=2	||AGQC(BTD[C])GNQIGAK EIVHIQAGQC(BTD[C])GNQIGAK|IVHIQAGQC(BTD[C])GNQIGAK EIVHIQAGQC(BTD[C])GNQIGAK	||2|3	||2.65|3.41	||0.25456|0.5208	3.03	0.54	5	2
P41091	101	EIF2S3	EIF2S3_101	IF2G_HUMAN Eukaryotic translation initiation factor 2 subunit 3 OS=Homo sapiens OX=9606 GN=EIF2S3 PE=1 SV=3	||LDDPSCPRPEC(BTD[C])YR|	||1|	||3.03|	||NA|	3.03	NA	1	1
Q15149	530	PLEC	PLEC_530	PLEC_HUMAN Plectin OS=Homo sapiens OX=9606 GN=PLEC PE=1 SV=3	LEC(BTD[C])LQR||LEC(BTD[C])LQR|	1||1|	1.65||4.43|	NA||NA|	3.04	1.97	2	2
P04406	152	GAPDH	GAPDH_152	G3P_HUMAN Glyceraldehyde-3-phosphate dehydrogenase OS=Homo sapiens OX=9606 GN=GAPDH PE=1 SV=3	IISNASC(BTD[C])TTNCLAPLAK|IISNASC(BTD[C])TTNCLAPLAK||IISNASC(BTD[C])TTNCLAPLAK	3|3||1	4.2|4.06||0.88	0.13229|0.20785||NA	3.05	1.88	7	3	Active site, Modified residue, Modified residue, Modified residue, Modified residue
Q7Z2W4	272	ZC3HAV1	ZC3HAV1_272	ZCCHV_HUMAN Zinc finger CCCH-type antiviral protein 1 OS=Homo sapiens OX=9606 GN=ZC3HAV1 PE=1 SV=3	SC(BTD[C])TPSPDQISHR|SC(BTD[C])TPSPDQISHR||	1|1||	3.38|2.75||	NA|NA||	3.07	0.45	2	2
P08134	16	RHOC	RHOC_16	RHOC_HUMAN Rho-related GTP-binding protein RhoC OS=Homo sapiens OX=9606 GN=RHOC PE=1 SV=1	||VIVGDGAC(BTD[C])GK LVIVGDGAC(BTD[C])GK|	||3|	||3.07|	||1.29326|	3.07	NA	3	1
Q96EK6	128	GNPNAT1	GNPNAT1_128	GNA1_HUMAN Glucosamine 6-phosphate N-acetyltransferase OS=Homo sapiens OX=9606 GN=GNPNAT1 PE=1 SV=1	|||VEDVVVSDEC(BTD[C])R	|||1	|||3.09	|||NA	3.09	NA	1	1
P08174	98	CD55	CD55_98	DAF_HUMAN Complement decay-accelerating factor OS=Homo sapiens OX=9606 GN=CD55 PE=1 SV=4	|SC(BTD[C])EVPTR||	|1||	|3.1||	|NA||	3.1	NA	1	1	Disulfide bond
Q6UB35	302	MTHFD1L	MTHFD1L_302	C1TM_HUMAN Monofunctional C1-tetrahydrofolate synthase, mitochondrial OS=Homo sapiens OX=9606 GN=MTHFD1L PE=1 SV=1	|||VGC(BTD[C])GSPR	|||1	|||3.13	|||NA	3.13	NA	1	1
P21333	623	FLNA	FLNA_623	FLNA_HUMAN Filamin-A OS=Homo sapiens OX=9606 GN=FLNA PE=1 SV=4	IEC(BTD[C])DDKGDGSCDVR|IEC(BTD[C])DDKGDGSCDVR||	1|1||	2.98|3.31||	NA|NA||	3.15	0.23	2	2
Q9NVS9	156	PNPO	PNPO_156	PNPO_HUMAN Pyridoxine-5'-phosphate oxidase OS=Homo sapiens OX=9606 GN=PNPO PE=1 SV=1	KLPEEEAEC(BTD[C])YFHSR|||	1|||	3.16|||	NA|||	3.16	NA	1	1
P21333	1165	FLNA	FLNA_1165	FLNA_HUMAN Filamin-A OS=Homo sapiens OX=9606 GN=FLNA PE=1 SV=4	||VKC(BTD[C])SGPGLER|VKC(BTD[C])SGPGLER	||2|1	||3.14|3.18	||0.14142|NA	3.16	0.03	3	2
P21333	1997	FLNA	FLNA_1997	FLNA_HUMAN Filamin-A OS=Homo sapiens OX=9606 GN=FLNA PE=1 SV=4	||EEPC(BTD[C])LLK|	||3|	||3.16|	||0.0|	3.16	NA	3	1
P62249	25	RPS16	RPS16_25	RS16_HUMAN 40S ribosomal protein S16 OS=Homo sapiens OX=9606 GN=RPS16 PE=1 SV=2	||TATAVAHC(BTD[C])K|	||1|	||3.18|	||NA|	3.18	NA	1	1
P18206	737	VCL	VCL_737	VINC_HUMAN Vinculin OS=Homo sapiens OX=9606 GN=VCL PE=1 SV=4	||DLDKC(BTD[C])K|DLDKC(BTD[C])K	||1|2	||3.13|3.27	||NA|0.15556	3.2	0.1	3	2
O75891	662	ALDH1L1	ALDH1L1_662	AL1L1_HUMAN Cytosolic 10-formyltetrahydrofolate dehydrogenase OS=Homo sapiens OX=9606 GN=ALDH1L1 PE=1 SV=2	||SC(BTD[C])AISNVK|SC(BTD[C])AISNVK	||3|3	||3.18|3.24	||0.05859|0.01155	3.21	0.04	6	2
O00303	256	EIF3F	EIF3F_256	EIF3F_HUMAN Eukaryotic translation initiation factor 3 subunit F OS=Homo sapiens OX=9606 GN=EIF3F PE=1 SV=1	||TC(BTD[C])FSPNR|TC(BTD[C])FSPNR	||2|2	||3.22|3.22	||0.0|0.0	3.22	0	4	2
P60866	36	RPS20	RPS20_36	RS20_HUMAN 40S ribosomal protein S20 OS=Homo sapiens OX=9606 GN=RPS20 PE=1 SV=1	||VC(BTD[C])ADLIR|VC(BTD[C])ADLIR	||2|3	||3.19|3.25	||0.0|0.12124	3.22	0.04	5	2
O95571	219	ETHE1	ETHE1_219	ETHE1_HUMAN Persulfide dioxygenase ETHE1, mitochondrial OS=Homo sapiens OX=9606 GN=ETHE1 PE=1 SV=2	||LTLSC(BTD[C])EEFVK|	||1|	||3.22|	||NA|	3.22	NA	1	1
P33240	150	CSTF2	CSTF2_150	CSTF2_HUMAN Cleavage stimulation factor subunit 2 OS=Homo sapiens OX=9606 GN=CSTF2 PE=1 SV=1	||LC(BTD[C])VQNSPQEAR|LC(BTD[C])VQNSPQEAR	||2|1	||3.53|2.92	||1.11723|NA	3.23	0.43	3	2
Q9Y3U8	48	RPL36	RPL36_48	RL36_HUMAN 60S ribosomal protein L36 OS=Homo sapiens OX=9606 GN=RPL36 PE=1 SV=3	||VC(BTD[C])GFAPYER|VC(BTD[C])GFAPYER	||1|1	||3.25|3.2	||NA|NA	3.23	0.04	2	2
P41091	105	EIF2S3	EIF2S3_105	IF2G_HUMAN Eukaryotic translation initiation factor 2 subunit 3 OS=Homo sapiens OX=9606 GN=EIF2S3 PE=1 SV=3	|||SC(BTD[C])GSSTPDEFPTDIPGTK	|||1	|||3.23	|||NA	3.23	NA	1	1
Q8WUM4	512	PDCD6IP	PDCD6IP_512	PDC6I_HUMAN Programmed cell death 6-interacting protein OS=Homo sapiens OX=9606 GN=PDCD6IP PE=1 SV=1	|EC(BTD[C])YQSHR|EC(BTD[C])YQSHR|	|1|3|	|2.22|4.26|	|NA|0.0866|	3.24	1.44	4	2
O00264	129	PGRMC1	PGRMC1_129	PGRC1_HUMAN Membrane-associated progesterone receptor component 1 OS=Homo sapiens OX=9606 GN=PGRMC1 PE=1 SV=3	GLATFC(BTD[C])LDK|||	1|||	3.25|||	NA|||	3.25	NA	1	1
P40261	50	NNMT	NNMT_50	NNMT_HUMAN Nicotinamide N-methyltransferase OS=Homo sapiens OX=9606 GN=NNMT PE=1 SV=1	IFC(BTD[C])LDGVK|||	1|||	3.25|||	NA|||	3.25	NA	1	1
P21333	2601	FLNA	FLNA_2601	FLNA_HUMAN Filamin-A OS=Homo sapiens OX=9606 GN=FLNA PE=1 SV=4	|||TPC(BTD[C])EEILVK	|||1	|||3.25	|||NA	3.25	NA	1	1
P61978	205	HNRNPK	HNRNPK_205	HNRPK_HUMAN Heterogeneous nuclear ribonucleoprotein K OS=Homo sapiens OX=9606 GN=HNRNPK PE=1 SV=1	|VVEC(BTD[C])IK|VVEC(BTD[C])IK|	|1|1|	|2.88|3.63|	|NA|NA|	3.26	0.53	2	2
P18206	325	VCL	VCL_325	VINC_HUMAN Vinculin OS=Homo sapiens OX=9606 GN=VCL PE=1 SV=4	|||REILGTC(BTD[C])K	|||3	|||3.26	|||0.22517	3.26	NA	3	1
Q9NYK5	133	MRPL39	MRPL39_133	RM39_HUMAN 39S ribosomal protein L39, mitochondrial OS=Homo sapiens OX=9606 GN=MRPL39 PE=1 SV=3	FLTFKDC(BTD[C])DPGEVNK|||DC(BTD[C])DPGEVNK	1|||1	3.61|||2.95	NA|||NA	3.28	0.47	2	2
P10155	71	RO60	RO60_71	RO60_HUMAN 60 kDa SS-A/Ro ribonucleoprotein OS=Homo sapiens OX=9606 GN=RO60 PE=1 SV=2	|GC(BTD[C])EVIQEIK||	|1||	|3.28||	|NA||	3.28	NA	1	1
P62244	30	RPS15A	RPS15A_30	RS15A_HUMAN 40S ribosomal protein S15a OS=Homo sapiens OX=9606 GN=RPS15A PE=1 SV=2	|LIRPC(BTD[C])SK QVLIRPC(BTD[C])SK|QVLIRPC(BTD[C])SK|QVLIRPC(BTD[C])SK	|2|1|1	|3.275|4.09|2.51	|2.0294|NA|NA	3.29	0.79	4	3
O75956	116	CDK2AP2	CDK2AP2_116	CDKA2_HUMAN Cyclin-dependent kinase 2-associated protein 2 OS=Homo sapiens OX=9606 GN=CDK2AP2 PE=1 SV=1	|||EC(BTD[C])LAETER	|||1	|||3.3	|||NA	3.3	NA	1	1
P78527	1183	PRKDC	PRKDC_1183	PRKDC_HUMAN DNA-dependent protein kinase catalytic subunit OS=Homo sapiens OX=9606 GN=PRKDC PE=1 SV=3	|PQTEC(BTD[C])R|PQTEC(BTD[C])R|PQTEC(BTD[C])R	|1|1|1	|4.17|2.3|3.44	|NA|NA|NA	3.3	0.94	3	3
P53396	1040	ACLY	ACLY_1040	ACLY_HUMAN ATP-citrate synthase OS=Homo sapiens OX=9606 GN=ACLY PE=1 SV=3	|NC(BTD[C])GSFTR|NC(BTD[C])GSFTR|	|1|1|	|2.33|4.35|	|NA|NA|	3.34	1.43	2	2
P04844	72	RPN2	RPN2_72	RPN2_HUMAN Dolichyl-diphosphooligosaccharide--protein glycosyltransferase subunit 2 OS=Homo sapiens OX=9606 GN=RPN2 PE=1 SV=3	||AC(BTD[C])TYIR|	||1|	||3.34|	||NA|	3.34	NA	1	1
P08174	145	CD55	CD55_145	DAF_HUMAN Complement decay-accelerating factor OS=Homo sapiens OX=9606 GN=CD55 PE=1 SV=4	LTC(BTD[C])LQNLK|LTC(BTD[C])LQNLK|LTC(BTD[C])LQNLK|LTC(BTD[C])LQNLK	1|1|1|1	2.74|2.79|4.16|3.71	NA|NA|NA|NA	3.35	0.7	4	4	Disulfide bond
Q9Y679	146	AUP1	AUP1_146	AUP1_HUMAN Ancient ubiquitous protein 1 OS=Homo sapiens OX=9606 GN=AUP1 PE=1 SV=2	||FC(BTD[C])ASTR|FC(BTD[C])ASTR	||1|1	||3.27|3.44	||NA|NA	3.36	0.12	2	2
Q96AE4	132	FUBP1	FUBP1_132	FUBP1_HUMAN Far upstream element-binding protein 1 OS=Homo sapiens OX=9606 GN=FUBP1 PE=1 SV=3	IQQESGC(BTD[C])K|||	1|||	3.37|||	NA|||	3.37	NA	1	1
O94826	317	TOMM70	TOMM70_317	TOM70_HUMAN Mitochondrial import receptor subunit TOM70 OS=Homo sapiens OX=9606 GN=TOMM70 PE=1 SV=1	||IISEC(BTD[C])SK|	||1|	||3.37|	||NA|	3.37	NA	1	1
P17812	30	CTPS1	CTPS1_30	PYRG1_HUMAN CTP synthase 1 OS=Homo sapiens OX=9606 GN=CTPS1 PE=1 SV=2	SC(BTD[C])GLHVTSIK|SC(BTD[C])GLHVTSIK|SC(BTD[C])GLHVTSIK|SC(BTD[C])GLHVTSIK	1|1|2|1	3.29|3.45|3.315|3.46	NA|NA|1.37886|NA	3.38	0.09	5	4
P62937	62	PPIA	PPIA_62	PPIA_HUMAN Peptidyl-prolyl cis-trans isomerase A OS=Homo sapiens OX=9606 GN=PPIA PE=1 SV=2	||MC(BTD[C])QGGDFTR|MC(BTD[C])QGGDFTR	||2|1	||3.23|3.53	||0.0|NA	3.38	0.21	3	2
Q9NVZ3	133	NECAP2	NECAP2_133	NECP2_HUMAN Adaptin ear-binding coat-associated protein 2 OS=Homo sapiens OX=9606 GN=NECAP2 PE=1 SV=1	QQC(BTD[C])EFAK|QQC(BTD[C])EFAK||	1|1||	3.78|3.01||	NA|NA||	3.4	0.54	2	2
O75369	706	FLNB	FLNB_706	FLNB_HUMAN Filamin-B OS=Homo sapiens OX=9606 GN=FLNB PE=1 SV=2	||MDGTYAC(BTD[C])SYTPVK|MDGTYAC(BTD[C])SYTPVK	||1|2	||2.39|4.44	||NA|0.0	3.42	1.45	3	2
Q8TDN6	52	BRIX1	BRIX1_52	BRX1_HUMAN Ribosome biogenesis protein BRX1 homolog OS=Homo sapiens OX=9606 GN=BRIX1 PE=1 SV=2	IPGPVC(BTD[C])K||IPGPVC(BTD[C])K|	2||2|	2.92||3.94|	0.0||0.0|	3.43	0.72	4	2
Q99471	49	PFDN5	PFDN5_49	PFD5_HUMAN Prefoldin subunit 5 OS=Homo sapiens OX=9606 GN=PFDN5 PE=1 SV=2	DC(BTD[C])LNVLNK||DC(BTD[C])LNVLNK|DC(BTD[C])LNVLNK	1||1|1	0.92||4.7|4.69	NA||NA|NA	3.44	2.18	3	3
P06733	339	ENO1	ENO1_339	ENOA_HUMAN Alpha-enolase OS=Homo sapiens OX=9606 GN=ENO1 PE=1 SV=2	SCNC(BTD[C])LLLK|||	1|||	3.44|||	NA|||	3.44	NA	1	1
P04406	156	GAPDH	GAPDH_156	G3P_HUMAN Glyceraldehyde-3-phosphate dehydrogenase OS=Homo sapiens OX=9606 GN=GAPDH PE=1 SV=3	IISNASCTTNC(BTD[C])LAPLAK|IISNASCTTNC(BTD[C])LAPLAK|IISNASCTTNC(BTD[C])LAPLAK|IISNASCTTNC(BTD[C])LAPLAK	2|1|2|1	3.7|3.73|3.45|2.94	0.0|NA|0.0|NA	3.46	0.37	6	4
Q00653	83	NFKB2	NFKB2_83	NFKB2_HUMAN Nuclear factor NF-kappa-B p100 subunit OS=Homo sapiens OX=9606 GN=NFKB2 PE=1 SV=4	||IC(BTD[C])NYEGPAK|IC(BTD[C])NYEGPAK	||2|1	||3.035|3.92	||0.20506|NA	3.48	0.63	3	2
Q9Y3C6	133	PPIL1	PPIL1_133	PPIL1_HUMAN Peptidyl-prolyl cis-trans isomerase-like 1 OS=Homo sapiens OX=9606 GN=PPIL1 PE=1 SV=1	|||VC(BTD[C])QGIGMVNR	|||1	|||3.48	|||NA	3.48	NA	1	1
P60468	39	SEC61B	SEC61B_39	SC61B_HUMAN Protein transport protein Sec61 subunit beta OS=Homo sapiens OX=9606 GN=SEC61B PE=1 SV=2	KNASC(BTD[C])GTR NASC(BTD[C])GTR|KNASC(BTD[C])GTR NASC(BTD[C])GTR|KNASC(BTD[C])GTR NASC(BTD[C])GTR|	4|4|2|	2.47|2.51|5.515|	0.59824|0.47641|4.80126|	3.5	1.75	10	3
Q7Z6Z7	1421	HUWE1	HUWE1_1421	HUWE1_HUMAN E3 ubiquitin-protein ligase HUWE1 OS=Homo sapiens OX=9606 GN=HUWE1 PE=1 SV=3	EKQEEEEAKC(BTD[C])LEK|||	1|||	3.5|||	NA|||	3.5	NA	1	1
Q13148	50	TARDBP	TARDBP_50	TADBP_HUMAN TAR DNA-binding protein 43 OS=Homo sapiens OX=9606 GN=TARDBP PE=1 SV=1	|NPVSQC(BTD[C])MR||	|1||	|3.53||	|NA||	3.53	NA	1	1
Q9UKG9	584	CROT	CROT_584	OCTC_HUMAN Peroxisomal carnitine O-octanoyltransferase OS=Homo sapiens OX=9606 GN=CROT PE=1 SV=2	||SC(BTD[C])PETDAEK|SC(BTD[C])PETDAEK	||1|2	||3.83|3.23	||NA|0.56569	3.53	0.42	3	2
P55786	339	NPEPPS	NPEPPS_339	PSA_HUMAN Puromycin-sensitive aminopeptidase OS=Homo sapiens OX=9606 GN=NPEPPS PE=1 SV=2	NSC(BTD[C])SSSR|NSC(BTD[C])SSSR|NSC(BTD[C])SSSR|NSC(BTD[C])SSSR	1|1|1|1	4.42|3.59|4.33|1.85	NA|NA|NA|NA	3.55	1.19	4	4
Q01518	416	CAP1	CAP1_416	CAP1_HUMAN Adenylyl cyclase-associated protein 1 OS=Homo sapiens OX=9606 GN=CAP1 PE=1 SV=5	||TDGC(BTD[C])HAYLSK|TDGC(BTD[C])HAYLSK	||2|1	||3.525|3.57	||0.74246|NA	3.55	0.03	3	2
P78527	491	PRKDC	PRKDC_491	PRKDC_HUMAN DNA-dependent protein kinase catalytic subunit OS=Homo sapiens OX=9606 GN=PRKDC PE=1 SV=3	|IC(BTD[C])SKPVVLPK||	|1||	|3.58||	|NA||	3.58	NA	1	1
P78417	192	GSTO1	GSTO1_192	GSTO1_HUMAN Glutathione S-transferase omega-1 OS=Homo sapiens OX=9606 GN=GSTO1 PE=1 SV=2	||LNEC(BTD[C])VDHTPK|	||1|	||3.58|	||NA|	3.58	NA	1	1
P04406	247	GAPDH	GAPDH_247	G3P_HUMAN Glyceraldehyde-3-phosphate dehydrogenase OS=Homo sapiens OX=9606 GN=GAPDH PE=1 SV=3	VPTANVSVVDLTC(BTD[C])R||VPTANVSVVDLTC(BTD[C])R|VPTANVSVVDLTC(BTD[C])R	2||2|2	3.51||3.62|3.635	0.82024||0.0|0.62933	3.59	0.07	6	3	Modified residue, Modified residue
Q9BXJ9	309	NAA15	NAA15_309	NAA15_HUMAN N-alpha-acetyltransferase 15, NatA auxiliary subunit OS=Homo sapiens OX=9606 GN=NAA15 PE=1 SV=1	||FKEC(BTD[C])LDK|	||1|	||3.59|	||NA|	3.59	NA	1	1
P51970	66	NDUFA8	NDUFA8_66	NDUA8_HUMAN NADH dehydrogenase [ubiquinone] 1 alpha subcomplex subunit 8 OS=Homo sapiens OX=9606 GN=NDUFA8 PE=1 SV=3	|VNKC(BTD[C])AL||	|1||	|3.6||	|NA||	3.6	NA	1	1	Disulfide bond
P09496	218	CLTA	CLTA_218	CLCA_HUMAN Clathrin light chain A OS=Homo sapiens OX=9606 GN=CLTA PE=1 SV=1	|LC(BTD[C])DFNPK|LC(BTD[C])DFNPK|LC(BTD[C])DFNPK	|1|3|1	|4.18|3.17|3.47	|NA|0.00577|NA	3.61	0.52	5	3
P38646	608	HSPA9	HSPA9_608	GRP75_HUMAN Stress-70 protein, mitochondrial OS=Homo sapiens OX=9606 GN=HSPA9 PE=1 SV=2	MEEFKDQLPADEC(BTD[C])NK|||	1|||	3.61|||	NA|||	3.61	NA	1	1
Q00610	436	CLTC	CLTC_436	CLH1_HUMAN Clathrin heavy chain 1 OS=Homo sapiens OX=9606 GN=CLTC PE=1 SV=5	||YESLELC(BTD[C])R|YESLELC(BTD[C])R	||1|1	||4.58|2.67	||NA|NA	3.63	1.35	2	2
P18206	85	VCL	VCL_85	VINC_HUMAN Vinculin OS=Homo sapiens OX=9606 GN=VCL PE=1 SV=4	||VENAC(BTD[C])TK|	||1|	||3.65|	||NA|	3.65	NA	1	1
Q96TA1	334	NIBAN2	NIBAN2_334	NIBA2_HUMAN Protein Niban 2 OS=Homo sapiens OX=9606 GN=NIBAN2 PE=1 SV=3	|||AEVC(BTD[C])VR	|||1	|||3.67	|||NA	3.67	NA	1	1
Q15274	96	QPRT	QPRT_96	NADC_HUMAN Nicotinate-nucleotide pyrophosphorylase [carboxylating] OS=Homo sapiens OX=9606 GN=QPRT PE=1 SV=3	||GPAHC(BTD[C])LLLGER|	||1|	||3.68|	||NA|	3.68	NA	1	1
Q9Y6E2	270	BZW2	BZW2_270	BZW2_HUMAN Basic leucine zipper and W2 domain-containing protein 2 OS=Homo sapiens OX=9606 GN=BZW2 PE=1 SV=1	||LSQEC(BTD[C])PIK|LSQEC(BTD[C])PIK	||3|2	||3.61|3.765	||0.19858|0.0495	3.69	0.11	5	2
P13716	162	ALAD	ALAD_162	HEM2_HUMAN Delta-aminolevulinic acid dehydratase OS=Homo sapiens OX=9606 GN=ALAD PE=1 SV=1	|||AGC(BTD[C])QVVAPSDMMDGR	|||1	|||3.69	|||NA	3.69	NA	1	1
P25786	92	PSMA1	PSMA1_92	PSA1_HUMAN Proteasome subunit alpha type-1 OS=Homo sapiens OX=9606 GN=PSMA1 PE=1 SV=1	||QEC(BTD[C])LDSR|QEC(BTD[C])LDSR	||1|1	||3.45|3.94	||NA|NA	3.7	0.35	2	2
Q6NSW5	47	DENND10P1	DENND10P1_47	DE10B_HUMAN Putative DENN domain-containing protein 10 B OS=Homo sapiens OX=9606 GN=DENND10P1 PE=5 SV=1	|KC(BTD[C])CLTDENK||	|1||	|3.7||	|NA||	3.7	NA	1	1
P00352	133	ALDH1A1	ALDH1A1_133	AL1A1_HUMAN Retinal dehydrogenase 1 OS=Homo sapiens OX=9606 GN=ALDH1A1 PE=1 SV=2	||YC(BTD[C])AGWADK|YC(BTD[C])AGWADK	||1|3	||3.42|4.0	||NA|0.3876	3.71	0.41	4	2
Q14697	41	GANAB	GANAB_41	GANAB_HUMAN Neutral alpha-glucosidase AB OS=Homo sapiens OX=9606 GN=GANAB PE=1 SV=3	|TC(BTD[C])EESSFCK||	|1||	|3.72||	|NA||	3.72	NA	1	1	Disulfide bond
P04632	144	CAPNS1	CAPNS1_144	CPNS1_HUMAN Calpain small subunit 1 OS=Homo sapiens OX=9606 GN=CAPNS1 PE=1 SV=1	||TDGFGIDTC(BTD[C])R|	||1|	||3.72|	||NA|	3.72	NA	1	1
P62906	66	RPL10A	RPL10A_66	RL10A_HUMAN 60S ribosomal protein L10a OS=Homo sapiens OX=9606 GN=RPL10A PE=1 SV=2	||FSVC(BTD[C])VLGDQQHCDEAK|	||1|	||3.74|	||NA|	3.74	NA	1	1
Q96T76	794	MMS19	MMS19_794	MMS19_HUMAN MMS19 nucleotide excision repair protein homolog OS=Homo sapiens OX=9606 GN=MMS19 PE=1 SV=2	|||VEAGLGSGPC(BTD[C])R	|||1	|||3.74	|||NA	3.74	NA	1	1
P24752	126	ACAT1	ACAT1_126	THIL_HUMAN Acetyl-CoA acetyltransferase, mitochondrial OS=Homo sapiens OX=9606 GN=ACAT1 PE=1 SV=1	VC(BTD[C])ASGMK|VC(BTD[C])ASGMK|VC(BTD[C])ASGMK|VC(BTD[C])ASGMK	2|4|2|1	2.28|3.21|4.805|4.7	1.62635|0.09238|0.02121|NA	3.75	1.22	9	4	Active site
Q6UVK1	533	CSPG4	CSPG4_533	CSPG4_HUMAN Chondroitin sulfate proteoglycan 4 OS=Homo sapiens OX=9606 GN=CSPG4 PE=1 SV=2	VPMPSC(BTD[C])LR|||	1|||	3.75|||	NA|||	3.75	NA	1	1
Q5JVF3	152	PCID2	PCID2_152	PCID2_HUMAN PCI domain-containing protein 2 OS=Homo sapiens OX=9606 GN=PCID2 PE=1 SV=2	|||VC(BTD[C])ASDTR	|||1	|||3.76	|||NA	3.76	NA	1	1
P48643	181	CCT5	CCT5_181	TCPE_HUMAN T-complex protein 1 subunit epsilon OS=Homo sapiens OX=9606 GN=CCT5 PE=1 SV=1	||VVNSC(BTD[C])HR|VVNSC(BTD[C])HR	||1|1	||3.01|4.52	||NA|NA	3.77	1.07	2	2
Q15493	248	RGN	RGN_248	RGN_HUMAN Regucalcin OS=Homo sapiens OX=9606 GN=RGN PE=1 SV=1	||TTSC(BTD[C])CFGGK|TTSC(BTD[C])CFGGK	||1|1	||4.05|3.51	||NA|NA	3.78	0.38	2	2
P78417	32	GSTO1	GSTO1_32	GSTO1_HUMAN Glutathione S-transferase omega-1 OS=Homo sapiens OX=9606 GN=GSTO1 PE=1 SV=2	FC(BTD[C])PFAER|FC(BTD[C])PFAER|FC(BTD[C])PFAER|FC(BTD[C])PFAER	3|1|1|2	3.32|3.29|4.58|3.965	1.47137|NA|NA|1.393	3.79	0.61	7	4	Active site
P63000	157	RAC1	RAC1_157	RAC1_HUMAN Ras-related C3 botulinum toxin substrate 1 OS=Homo sapiens OX=9606 GN=RAC1 PE=1 SV=1	||YLEC(BTD[C])SALTQR|YLEC(BTD[C])SALTQR	||1|2	||3.01|4.57	||NA|0.0	3.79	1.1	3	2
Q9NXG2	31	THUMPD1	THUMPD1_31	THUM1_HUMAN THUMP domain-containing protein 1 OS=Homo sapiens OX=9606 GN=THUMPD1 PE=1 SV=2	RC(BTD[C])DAGGPR||RC(BTD[C])DAGGPR|RC(BTD[C])DAGGPR	2||1|1	7.025||0.9|3.45	0.03536||NA|NA	3.79	3.08	4	3
P06733	357	ENO1	ENO1_357	ENOA_HUMAN Alpha-enolase OS=Homo sapiens OX=9606 GN=ENO1 PE=1 SV=2	VNQIGSVTESIQAC(BTD[C])K||VNQIGSVTESIQAC(BTD[C])K|VNQIGSVTESIQAC(BTD[C])K	1||2|2	3.3||5.165|2.91	NA||0.12021|0.28284	3.79	1.21	5	3
O15355	164	PPM1G	PPM1G_164	PPM1G_HUMAN Protein phosphatase 1G OS=Homo sapiens OX=9606 GN=PPM1G PE=1 SV=1	|YGQNC(BTD[C])HK||	|1||	|3.8||	|NA||	3.8	NA	1	1
Q71UM5	77	RPS27L	RPS27L_77	RS27L_HUMAN 40S ribosomal protein S27-like OS=Homo sapiens OX=9606 GN=RPS27L PE=1 SV=3	||LTEGC(BTD[C])SFR|LTEGC(BTD[C])SFR	||2|1	||4.235|3.38	||0.34648|NA	3.81	0.6	3	2
P32969	134	RPL9	RPL9_134	RL9_HUMAN 60S ribosomal protein L9 OS=Homo sapiens OX=9606 GN=RPL9 PE=1 SV=1	MRPGVAC(BTD[C])SVSQAQK|MRPGVAC(BTD[C])SVSQAQK||	3|1||	4.56|3.07||	0.87323|NA||	3.82	1.05	4	2
Q14116	112	IL18	IL18_112	IL18_HUMAN Interleukin-18 OS=Homo sapiens OX=9606 GN=IL18 PE=1 SV=1	||ISTLSC(BTD[C])ENK|	||1|	||3.82|	||NA|	3.82	NA	1	1
P23528	80	CFL1	CFL1_80	COF1_HUMAN Cofilin-1 OS=Homo sapiens OX=9606 GN=CFL1 PE=1 SV=3	|MLPDKDC(BTD[C])R|MLPDKDC(BTD[C])R|MLPDKDC(BTD[C])R	|1|4|1	|3.79|4.105|3.58	|NA|1.37774|NA	3.83	0.26	6	3
P60174	104	TPI1	TPI1_104	TPIS_HUMAN Triosephosphate isomerase OS=Homo sapiens OX=9606 GN=TPI1 PE=1 SV=3	|IAVAAQNC(BTD[C])YK|IAVAAQNC(BTD[C])YK|IAVAAQNC(BTD[C])YK	|1|2|1	|1.21|4.8|5.52	|NA|0.0|NA	3.84	2.31	4	3
Q99832	370	CCT7	CCT7_370	TCPH_HUMAN T-complex protein 1 subunit eta OS=Homo sapiens OX=9606 GN=CCT7 PE=1 SV=2	|TC(BTD[C])TFILR||TC(BTD[C])TFILR	|1||3	|3.6||4.11	|NA||0.0	3.86	0.36	4	2
Q03519	353	TAP2	TAP2_353	TAP2_HUMAN Antigen peptide transporter 2 OS=Homo sapiens OX=9606 GN=TAP2 PE=1 SV=1	SFGAEEHEVC(BTD[C])R||SFGAEEHEVC(BTD[C])R|SFGAEEHEVC(BTD[C])R	1||2|2	1.92||5.015|4.64	NA||1.68999|0.0	3.86	1.69	5	3
P13639	693	EEF2	EEF2_693	EF2_HUMAN Elongation factor 2 OS=Homo sapiens OX=9606 GN=EEF2 PE=1 SV=4	||EGALC(BTD[C])EENMR|EGALC(BTD[C])EENMR	||1|3	||4.81|2.98	||NA|1.74001	3.9	1.29	4	2
Q8N427	362	NME8	NME8_362	TXND3_HUMAN Thioredoxin domain-containing protein 3 OS=Homo sapiens OX=9606 GN=NME8 PE=2 SV=2	|EAQALC(BTD[C])K||	|1||	|3.94||	|NA||	3.94	NA	1	1
Q99729	98	HNRNPAB	HNRNPAB_98	ROAA_HUMAN Heterogeneous nuclear ribonucleoprotein A/B OS=Homo sapiens OX=9606 GN=HNRNPAB PE=1 SV=2	||FGEVVDC(BTD[C])TIK|FGEVVDC(BTD[C])TIK	||2|1	||3.445|4.47	||0.8556|NA	3.96	0.72	3	2
P18206	313	VCL	VCL_313	VINC_HUMAN Vinculin OS=Homo sapiens OX=9606 GN=VCL PE=1 SV=4	|||VGELC(BTD[C])AGK	|||1	|||3.96	|||NA	3.96	NA	1	1
P55060	842	CSE1L	CSE1L_842	XPO2_HUMAN Exportin-2 OS=Homo sapiens OX=9606 GN=CSE1L PE=1 SV=3	KIC(BTD[C])AVGITK|KIC(BTD[C])AVGITK|IC(BTD[C])AVGITK|KIC(BTD[C])AVGITK IC(BTD[C])AVGITK	2|1|2|2	6.975|4.18|2.71|1.98	0.45962|NA|0.04243|0.2687	3.96	2.21	7	4
O43765	153	SGTA	SGTA_153	SGTA_HUMAN Small glutamine-rich tetratricopeptide repeat-containing protein alpha OS=Homo sapiens OX=9606 GN=SGTA PE=1 SV=1	|AIC(BTD[C])IDPAYSK||AIC(BTD[C])IDPAYSK	|1||1	|2.26||5.69	|NA||NA	3.98	2.43	2	2
P62241	182	RPS8	RPS8_182	RS8_HUMAN 40S ribosomal protein S8 OS=Homo sapiens OX=9606 GN=RPS8 PE=1 SV=2	PGQC(BTD[C])GR|PGQC(BTD[C])GR|PGQC(BTD[C])GR|PGQC(BTD[C])GR	1|2|2|2	3.74|3.9|4.2|4.095	NA|0.0|0.0|0.10607	3.98	0.2	7	4
P05198	70	EIF2S1	EIF2S1_70	IF2A_HUMAN Eukaryotic translation initiation factor 2 subunit 1 OS=Homo sapiens OX=9606 GN=EIF2S1 PE=1 SV=3	NEC(BTD[C])VVVIR||NEC(BTD[C])VVVIR|	1||1|	2.53||5.45|	NA||NA|	3.99	2.06	2	2
P49189	387	ALDH9A1	ALDH9A1_387	AL9A1_HUMAN 4-trimethylaminobutyraldehyde dehydrogenase OS=Homo sapiens OX=9606 GN=ALDH9A1 PE=1 SV=3	||DDMTC(BTD[C])VK|DDMTC(BTD[C])VK	||1|1	||3.7|4.3	||NA|NA	4	0.42	2	2
Q99497	46	PARK7	PARK7_46	PARK7_HUMAN Protein/nucleic acid deglycase DJ-1 OS=Homo sapiens OX=9606 GN=PARK7 PE=1 SV=2	|||DPVQC(BTD[C])SR	|||1	|||4.01	|||NA	4.01	NA	1	1
P57088	224	TMEM33	TMEM33_224	TMM33_HUMAN Transmembrane protein 33 OS=Homo sapiens OX=9606 GN=TMEM33 PE=1 SV=2	PAC(BTD[C])PLFVR|PAC(BTD[C])PLFVR|PAC(BTD[C])PLFVR|	1|1|1|	5.27|5.39|1.52|	NA|NA|NA|	4.06	2.2	3	3
Q86VP6	1153	CAND1	CAND1_1153	CAND1_HUMAN Cullin-associated NEDD8-dissociated protein 1 OS=Homo sapiens OX=9606 GN=CAND1 PE=1 SV=2	||ATC(BTD[C])TTK|	||1|	||4.06|	||NA|	4.06	NA	1	1
P35579	988	MYH9	MYH9_988	MYH9_HUMAN Myosin-9 OS=Homo sapiens OX=9606 GN=MYH9 PE=1 SV=4	LEEEQIILEDQNC(BTD[C])K|KLEEEQIILEDQNC(BTD[C])K LEEEQIILEDQNC(BTD[C])K|KLEEEQIILEDQNC(BTD[C])K LEEEQIILEDQNC(BTD[C])K|KLEEEQIILEDQNC(BTD[C])K	1|2|3|1	4.25|3.38|6.2|2.42	NA|1.04652|4.15563|NA	4.06	1.61	7	4
P49207	49	RPL34	RPL34_49	RL34_HUMAN 60S ribosomal protein L34 OS=Homo sapiens OX=9606 GN=RPL34 PE=1 SV=3	||CGVC(BTD[C])PGR|CGVC(BTD[C])PGR	||2|1	||4.31|3.82	||0.0|NA	4.07	0.35	3	2
P60059	25	SEC61G	SEC61G_25	SC61G_HUMAN Protein transport protein Sec61 subunit gamma OS=Homo sapiens OX=9606 GN=SEC61G PE=1 SV=1	||RC(BTD[C])TKPDR|RC(BTD[C])TKPDR	||1|1	||5.42|2.71	||NA|NA	4.07	1.92	2	2
O14976	1142	GAK	GAK_1142	GAK_HUMAN Cyclin-G-associated kinase OS=Homo sapiens OX=9606 GN=GAK PE=1 SV=2	AC(BTD[C])TQPR|||	1|||	4.07|||	NA|||	4.07	NA	1	1
Q32MZ4	644	LRRFIP1	LRRFIP1_644	LRRF1_HUMAN Leucine-rich repeat flightless-interacting protein 1 OS=Homo sapiens OX=9606 GN=LRRFIP1 PE=1 SV=2	||IAAESSENVDC(BTD[C])PENPK|IAAESSENVDC(BTD[C])PENPK	||1|1	||4.28|3.94	||NA|NA	4.11	0.24	2	2
P09874	256	PARP1	PARP1_256	PARP1_HUMAN Poly [ADP-ribose] polymerase 1 OS=Homo sapiens OX=9606 GN=PARP1 PE=1 SV=4	|KVC(BTD[C])STNDLK|KVC(BTD[C])STNDLK|KVC(BTD[C])STNDLK	|1|1|1	|4.6|3.78|3.96	|NA|NA|NA	4.11	0.43	3	3
P49773	84	HINT1	HINT1_84	HINT1_HUMAN Histidine triad nucleotide-binding protein 1 OS=Homo sapiens OX=9606 GN=HINT1 PE=1 SV=2	KC(BTD[C])AADLGLNK|KC(BTD[C])AADLGLNK||	1|1||	3.44|4.79||	NA|NA||	4.12	0.95	2	2
P05165	76	PCCA	PCCA_76	PCCA_HUMAN Propionyl-CoA carboxylase alpha chain, mitochondrial OS=Homo sapiens OX=9606 GN=PCCA PE=1 SV=4	||GEIAC(BTD[C])R|	||1|	||4.12|	||NA|	4.12	NA	1	1
Q9NZM1	275	MYOF	MYOF_275	MYOF_HUMAN Myoferlin OS=Homo sapiens OX=9606 GN=MYOF PE=1 SV=1	|||ADC(BTD[C])LMGEFK	|||1	|||4.13	|||NA	4.13	NA	1	1
P14618	423	PKM	PKM_423	KPYM_HUMAN Pyruvate kinase PKM OS=Homo sapiens OX=9606 GN=PKM PE=1 SV=4	C(BTD[C])CSGAIIVLTK|||	1|||	4.14|||	NA|||	4.14	NA	1	1
P05166	517	PCCB	PCCB_517	PCCB_HUMAN Propionyl-CoA carboxylase beta chain, mitochondrial OS=Homo sapiens OX=9606 GN=PCCB PE=1 SV=3	|||ICC(BTD[C])DLDVLASK	|||1	|||4.14	|||NA	4.14	NA	1	1
P55060	939	CSE1L	CSE1L_939	XPO2_HUMAN Exportin-2 OS=Homo sapiens OX=9606 GN=CSE1L PE=1 SV=3	LSTAC(BTD[C])PGR||LSTAC(BTD[C])PGR|	1||1|	5.32||2.97|	NA||NA|	4.15	1.66	2	2
P41250	466	GARS	GARS_466	GARS_HUMAN Glycine--tRNA ligase OS=Homo sapiens OX=9606 GN=GARS PE=1 SV=3	SC(BTD[C])YDLSCHAR|SC(BTD[C])YDLSCHAR||	2|1||	4.415|3.88||	0.26163|NA||	4.15	0.38	3	2
P10316	363	HLA-A	HLA-A_363	1A69_HUMAN HLA class I histocompatibility antigen, A-69 alpha chain OS=Homo sapiens OX=9606 GN=HLA-A PE=1 SV=2	KGGSYSQAASSDSAQGSDVSLTAC(BTD[C])K|||	1|||	4.15|||	NA|||	4.15	NA	1	1
P52888	350	THOP1	THOP1_350	THOP1_HUMAN Thimet oligopeptidase OS=Homo sapiens OX=9606 GN=THOP1 PE=1 SV=2	|YC(BTD[C])VDQNLLK||YC(BTD[C])VDQNLLK	|1||1	|2.92||5.38	|NA||NA	4.15	1.74	2	2
Q93008	116	USP9X	USP9X_116	USP9X_HUMAN Probable ubiquitin carboxyl-terminal hydrolase FAF-X OS=Homo sapiens OX=9606 GN=USP9X PE=1 SV=3	||SEAC(BTD[C])QR|SEAC(BTD[C])QR	||1|1	||5.43|2.92	||NA|NA	4.18	1.77	2	2
Q9P2J5	546	LARS	LARS_546	SYLC_HUMAN Leucine--tRNA ligase, cytoplasmic OS=Homo sapiens OX=9606 GN=LARS PE=1 SV=2	QTSQC(BTD[C])LK|QTSQC(BTD[C])LK|QTSQC(BTD[C])LK|QTSQC(BTD[C])LK	1|1|1|1	4.2|4.29|2.87|5.38	NA|NA|NA|NA	4.19	1.03	4	4
Q96L21	105	RPL10L	RPL10L_105	RL10L_HUMAN 60S ribosomal protein L10-like OS=Homo sapiens OX=9606 GN=RPL10L PE=1 SV=3	||MLSC(BTD[C])AGADR|MLSC(BTD[C])AGADR	||1|1	||4.3|4.08	||NA|NA	4.19	0.16	2	2
P62851	59	RPS25	RPS25_59	RS25_HUMAN 40S ribosomal protein S25 OS=Homo sapiens OX=9606 GN=RPS25 PE=1 SV=1	||TYDKLC(BTD[C])K|TYDKLC(BTD[C])K	||1|2	||3.21|5.18	||NA|1.25865	4.2	1.39	3	2
Q96TA1	512	NIBAN2	NIBAN2_512	NIBA2_HUMAN Protein Niban 2 OS=Homo sapiens OX=9606 GN=NIBAN2 PE=1 SV=3	||LAPTC(BTD[C])K|LAPTC(BTD[C])K	||1|1	||3.01|5.39	||NA|NA	4.2	1.68	2	2
Q06323	22	PSME1	PSME1_22	PSME1_HUMAN Proteasome activator complex subunit 1 OS=Homo sapiens OX=9606 GN=PSME1 PE=1 SV=1	VDVFREDLC(BTD[C])TK|FREDLC(BTD[C])TK VFREDLC(BTD[C])TK VDVFREDLC(BTD[C])TK||	1|3||	4.48|3.94||	NA|3.77151||	4.21	0.38	4	2
P60981	23	DSTN	DSTN_23	DEST_HUMAN Destrin OS=Homo sapiens OX=9606 GN=DSTN PE=1 SV=3	KC(BTD[C])STPEEIK|KC(BTD[C])STPEEIK|KC(BTD[C])STPEEIK|KC(BTD[C])STPEEIK	1|1|2|1	1.47|2.56|8.025|4.8	NA|NA|0.02121|NA	4.21	2.89	5	4
P61978	145	HNRNPK	HNRNPK_145	HNRPK_HUMAN Heterogeneous nuclear ribonucleoprotein K OS=Homo sapiens OX=9606 GN=HNRNPK PE=1 SV=1	||GSDFDC(BTD[C])ELR|GSDFDC(BTD[C])ELR	||1|1	||4.94|3.49	||NA|NA	4.22	1.03	2	2
Q9H074	470	PAIP1	PAIP1_470	PAIP1_HUMAN Polyadenylate-binding protein-interacting protein 1 OS=Homo sapiens OX=9606 GN=PAIP1 PE=1 SV=1	||FC(BTD[C])LESER|FC(BTD[C])LESER	||1|1	||5.34|3.1	||NA|NA	4.22	1.58	2	2
P60900	47	PSMA6	PSMA6_47	PSA6_HUMAN Proteasome subunit alpha type-6 OS=Homo sapiens OX=9606 GN=PSMA6 PE=1 SV=1	GKDC(BTD[C])AVIVTQK|GKDC(BTD[C])AVIVTQK||GKDC(BTD[C])AVIVTQK DC(BTD[C])AVIVTQK	1|2||2	5.44|4.3||2.96	NA|0.0||1.03238	4.23	1.24	5	3
P13639	591	EEF2	EEF2_591	EF2_HUMAN Elongation factor 2 OS=Homo sapiens OX=9606 GN=EEF2 PE=1 SV=4	||ETVSEESNVLC(BTD[C])LSK|ETVSEESNVLC(BTD[C])LSK	||2|2	||4.79|3.685	||0.0|1.16673	4.24	0.78	4	2
P55060	85	CSE1L	CSE1L_85	XPO2_HUMAN Exportin-2 OS=Homo sapiens OX=9606 GN=CSE1L PE=1 SV=3	IVEDEPNKIC(BTD[C])EADR|IVEDEPNKIC(BTD[C])EADR||	1|1||	5.41|3.07||	NA|NA||	4.24	1.65	2	2
Q92616	2015	GCN1	GCN1_2015	GCN1_HUMAN eIF-2-alpha kinase activator GCN1 OS=Homo sapiens OX=9606 GN=GCN1 PE=1 SV=6	||ALC(BTD[C])DPLEEVR|KALC(BTD[C])DPLEEVR	||1|1	||5.61|2.88	||NA|NA	4.25	1.93	2	2
Q7Z6Z7	1401	HUWE1	HUWE1_1401	HUWE1_HUMAN E3 ubiquitin-protein ligase HUWE1 OS=Homo sapiens OX=9606 GN=HUWE1 PE=1 SV=3	AESPEEVAC(BTD[C])R|AESPEEVAC(BTD[C])R|AESPEEVAC(BTD[C])R|	1|3|2|	3.15|3.0|6.6|	NA|0.02309|0.0|	4.25	2.04	6	3
P50990	36	CCT8	CCT8_36	TCPQ_HUMAN T-complex protein 1 subunit theta OS=Homo sapiens OX=9606 GN=CCT8 PE=1 SV=4	||NIQAC(BTD[C])K|NIQAC(BTD[C])K	||1|1	||4.42|4.08	||NA|NA	4.25	0.24	2	2
P35998	377	PSMC2	PSMC2_377	PRS7_HUMAN 26S proteasome regulatory subunit 7 OS=Homo sapiens OX=9606 GN=PSMC2 PE=1 SV=3	||LC(BTD[C])PNSTGAEIR|	||1|	||4.26|	||NA|	4.26	NA	1	1
P16615	997	ATP2A2	ATP2A2_997	AT2A2_HUMAN Sarcoplasmic/endoplasmic reticulum calcium ATPase 2 OS=Homo sapiens OX=9606 GN=ATP2A2 PE=1 SV=1	|NYLEPGKEC(BTD[C])VQPATK|NYLEPGKEC(BTD[C])VQPATK|	|1|1|	|2.52|6.01|	|NA|NA|	4.27	2.47	2	2
P21266	119	GSTM3	GSTM3_119	GSTM3_HUMAN Glutathione S-transferase Mu 3 OS=Homo sapiens OX=9606 GN=GSTM3 PE=1 SV=3	LC(BTD[C])YSSDHEK|LC(BTD[C])YSSDHEK|LC(BTD[C])YSSDHEK|LC(BTD[C])YSSDHEK	2|1|1|1	5.315|3.0|4.43|4.34	0.00707|NA|NA|NA	4.27	0.95	5	4
Q16643	98	DBN1	DBN1_98	DREB_HUMAN Drebrin OS=Homo sapiens OX=9606 GN=DBN1 PE=1 SV=4	KCAC(BTD[C])ASHVAK|||	1|||	4.28|||	NA|||	4.28	NA	1	1
P24390	29	KDELR1	KDELR1_29	ERD21_HUMAN ER lumen protein-retaining receptor 1 OS=Homo sapiens OX=9606 GN=KDELR1 PE=1 SV=1	|SC(BTD[C])AGISGK|SC(BTD[C])AGISGK|	|1|2|	|4.92|3.66|	|NA|1.95161|	4.29	0.89	3	2
P78527	111	PRKDC	PRKDC_111	PRKDC_HUMAN DNA-dependent protein kinase catalytic subunit OS=Homo sapiens OX=9606 GN=PRKDC PE=1 SV=3	NTC(BTD[C])TSVYTK||NTC(BTD[C])TSVYTK|NTC(BTD[C])TSVYTK	1||1|1	5.2||3.67|4.13	NA||NA|NA	4.33	0.79	3	3
P67936	154	TPM4	TPM4_154	TPM4_HUMAN Tropomyosin alpha-4 chain OS=Homo sapiens OX=9606 GN=TPM4 PE=1 SV=3	||AEVSELKC(BTD[C])GDLEEELK|AEVSELKC(BTD[C])GDLEEELK	||1|1	||4.18|4.5	||NA|NA	4.34	0.23	2	2
P05198	218	EIF2S1	EIF2S1_218	IF2A_HUMAN Eukaryotic translation initiation factor 2 subunit 1 OS=Homo sapiens OX=9606 GN=EIF2S1 PE=1 SV=3	|||AGLNC(BTD[C])STENMPIK	|||1	|||4.37	|||NA	4.37	NA	1	1
O75116	804	ROCK2	ROCK2_804	ROCK2_HUMAN Rho-associated protein kinase 2 OS=Homo sapiens OX=9606 GN=ROCK2 PE=1 SV=4	RC(BTD[C])LTQNDLK|RC(BTD[C])LTQNDLK||	2|2||	4.615|4.13||	0.50205|0.0||	4.37	0.34	4	2
O43684	129	BUB3	BUB3_129	BUB3_HUMAN Mitotic checkpoint protein BUB3 OS=Homo sapiens OX=9606 GN=BUB3 PE=1 SV=1	||TPC(BTD[C])NAGTFSQPEK|	||2|	||4.395|	||0.16263|	4.4	NA	2	1
Q9NYP7	61	ELOVL5	ELOVL5_61	ELOV5_HUMAN Elongation of very long chain fatty acids protein 5 OS=Homo sapiens OX=9606 GN=ELOVL5 PE=1 SV=1	QPFSC(BTD[C])R|QPFSC(BTD[C])R||QPFSC(BTD[C])R	2|1||1	4.38|4.55||4.28	0.0|NA||NA	4.4	0.14	4	3
P50991	295	CCT4	CCT4_295	TCPD_HUMAN T-complex protein 1 subunit delta OS=Homo sapiens OX=9606 GN=CCT4 PE=1 SV=4	TGC(BTD[C])NVLLIQK|TGC(BTD[C])NVLLIQK|TGC(BTD[C])NVLLIQK|TGC(BTD[C])NVLLIQK	1|1|2|1	5.52|4.72|4.685|2.69	NA|NA|0.64347|NA	4.4	1.21	5	4
P22314	632	UBA1	UBA1_632	UBA1_HUMAN Ubiquitin-like modifier-activating enzyme 1 OS=Homo sapiens OX=9606 GN=UBA1 PE=1 SV=3	SIPIC(BTD[C])TLK|SIPIC(BTD[C])TLK|SIPIC(BTD[C])TLK|SIPIC(BTD[C])TLK	1|1|2|1	2.17|2.22|5.33|7.94	NA|NA|0.0|NA	4.42	2.78	5	4	Active site
P37802	124	TAGLN2	TAGLN2_124	TAGL2_HUMAN Transgelin-2 OS=Homo sapiens OX=9606 GN=TAGLN2 PE=1 SV=3	||NMAC(BTD[C])VQR|NMAC(BTD[C])VQR	||3|1	||4.61|4.25	||4.57839|NA	4.43	0.25	4	2
O15067	270	PFAS	PFAS_270	PUR4_HUMAN Phosphoribosylformylglycinamidine synthase OS=Homo sapiens OX=9606 GN=PFAS PE=1 SV=4	||FC(BTD[C])DNSSAIQGK|	||1|	||4.43|	||NA|	4.43	NA	1	1
P46776	70	RPL27A	RPL27A_70	RL27A_HUMAN 60S ribosomal protein L27a OS=Homo sapiens OX=9606 GN=RPL27A PE=1 SV=2	||NQSFC(BTD[C])PTVNLDK|	||1|	||4.43|	||NA|	4.43	NA	1	1
Q6IBS0	141	TWF2	TWF2_141	TWF2_HUMAN Twinfilin-2 OS=Homo sapiens OX=9606 GN=TWF2 PE=1 SV=2	|HLSSC(BTD[C])AAPAPLTSAER||	|1||	|4.45||	|NA||	4.45	NA	1	1
Q93088	131	BHMT	BHMT_131	BHMT1_HUMAN Betaine--homocysteine S-methyltransferase 1 OS=Homo sapiens OX=9606 GN=BHMT PE=1 SV=2	|||QVADEGDALVAGGVSQTPSYLSC(BTD[C])K	|||1	|||4.47	|||NA	4.47	NA	1	1
O14980	99	XPO1	XPO1_99	XPO1_HUMAN Exportin-1 OS=Homo sapiens OX=9606 GN=XPO1 PE=1 SV=1	||NQC(BTD[C])EGIKK|NQC(BTD[C])EGIKK	||1|2	||5.0|3.995	||NA|0.98288	4.5	0.71	3	2
P31153	56	MAT2A	MAT2A_56	METK2_HUMAN S-adenosylmethionine synthase isoform type-2 OS=Homo sapiens OX=9606 GN=MAT2A PE=1 SV=1	||AC(BTD[C])ETVAK VAC(BTD[C])ETVAK|AC(BTD[C])ETVAK	||2|1	||5.35|3.7	||2.48902|NA	4.53	1.17	3	2
Q52LJ0	295	FAM98B	FAM98B_295	FA98B_HUMAN Protein FAM98B OS=Homo sapiens OX=9606 GN=FAM98B PE=1 SV=2	||TAC(BTD[C])AINK|TAC(BTD[C])AINK	||2|2	||3.915|5.14	||0.68589|1.75362	4.53	0.87	4	2
Q96PZ0	38	PUS7	PUS7_38	PUS7_HUMAN Pseudouridylate synthase 7 homolog OS=Homo sapiens OX=9606 GN=PUS7 PE=1 SV=2	LSEC(BTD[C])SLTK|||	1|||	4.53|||	NA|||	4.53	NA	1	1
Q3LXA3	404	TKFC	TKFC_404	TKFC_HUMAN Triokinase/FMN cyclase OS=Homo sapiens OX=9606 GN=TKFC PE=1 SV=2	AAGDGDC(BTD[C])GTTHSR|||	1|||	4.56|||	NA|||	4.56	NA	1	1
Q14204	4570	DYNC1H1	DYNC1H1_4570	DYHC1_HUMAN Cytoplasmic dynein 1 heavy chain 1 OS=Homo sapiens OX=9606 GN=DYNC1H1 PE=1 SV=5	LQGATC(BTD[C])NNNK||LQGATC(BTD[C])NNNK|	1||1|	3.84||5.28|	NA||NA|	4.56	1.02	2	2
Q14019	10	COTL1	COTL1_10	COTL1_HUMAN Coactosin-like protein OS=Homo sapiens OX=9606 GN=COTL1 PE=1 SV=3	||IDKEAC(BTD[C])R|	||1|	||4.57|	||NA|	4.57	NA	1	1
P61978	184	HNRNPK	HNRNPK_184	HNRPK_HUMAN Heterogeneous nuclear ribonucleoprotein K OS=Homo sapiens OX=9606 GN=HNRNPK PE=1 SV=1	||LFQEC(BTD[C])CPHSTDR|	||1|	||4.58|	||NA|	4.58	NA	1	1
Q00839	562	HNRNPU	HNRNPU_562	HNRPU_HUMAN Heterogeneous nuclear ribonucleoprotein U OS=Homo sapiens OX=9606 GN=HNRNPU PE=1 SV=6	APQC(BTD[C])LGK|APQC(BTD[C])LGK|APQC(BTD[C])LGK|APQC(BTD[C])LGK	1|2|2|2	6.04|5.955|3.305|3.11	NA|0.00707|0.19092|0.52326	4.6	1.61	7	4
P38646	487	HSPA9	HSPA9_487	GRP75_HUMAN Stress-70 protein, mitochondrial OS=Homo sapiens OX=9606 GN=HSPA9 PE=1 SV=2	VC(BTD[C])QGER|VC(BTD[C])QGER|VC(BTD[C])QGER|VC(BTD[C])QGER	1|2|1|1	6.21|3.585|4.44|4.44	NA|2.82136|NA|NA	4.67	1.1	5	4
Q9Y617	224	PSAT1	PSAT1_224	SERC_HUMAN Phosphoserine aminotransferase OS=Homo sapiens OX=9606 GN=PSAT1 PE=1 SV=2	||EC(BTD[C])PSVLEYK|	||1|	||4.67|	||NA|	4.67	NA	1	1
Q96RU3	248	FNBP1	FNBP1_248	FNBP1_HUMAN Formin-binding protein 1 OS=Homo sapiens OX=9606 GN=FNBP1 PE=1 SV=2	||C(BTD[C])LDGIVK|	||1|	||4.72|	||NA|	4.72	NA	1	1
Q01518	427	CAP1	CAP1_427	CAP1_HUMAN Adenylyl cyclase-associated protein 1 OS=Homo sapiens OX=9606 GN=CAP1 PE=1 SV=5	|||NSLDC(BTD[C])EIVSAK	|||1	|||4.72	|||NA	4.72	NA	1	1
P54577	519	YARS	YARS_519	SYYC_HUMAN Tyrosine--tRNA ligase, cytoplasmic OS=Homo sapiens OX=9606 GN=YARS PE=1 SV=4	LGSISC(BTD[C])K|||	1|||	4.73|||	NA|||	4.73	NA	1	1
O60701	112	UGDH	UGDH_112	UGDH_HUMAN UDP-glucose 6-dehydrogenase OS=Homo sapiens OX=9606 GN=UGDH PE=1 SV=1	||YIEAC(BTD[C])AR|YIEAC(BTD[C])AR	||2|1	||4.68|4.81	||0.60811|NA	4.75	0.09	3	2
P42677	77	RPS27	RPS27_77	RS27_HUMAN 40S ribosomal protein S27 OS=Homo sapiens OX=9606 GN=RPS27 PE=1 SV=3	|LTEGC(BTD[C])SFR||	|1||	|4.75||	|NA||	4.75	NA	1	1
P62495	335	ETF1	ETF1_335	ERF1_HUMAN Eukaryotic peptide chain release factor subunit 1 OS=Homo sapiens OX=9606 GN=ETF1 PE=1 SV=3	|||YVLHC(BTD[C])QGTEEEK	|||1	|||4.76	|||NA	4.76	NA	1	1
P60866	70	RPS20	RPS20_70	RS20_HUMAN 40S ribosomal protein S20 OS=Homo sapiens OX=9606 GN=RPS20 PE=1 SV=1	KTPC(BTD[C])GEGSK TPC(BTD[C])GEGSK|KTPC(BTD[C])GEGSK|KTPC(BTD[C])GEGSK TPC(BTD[C])GEGSK|KTPC(BTD[C])GEGSK	3|3|4|3	3.53|3.51|5.505|6.53	0.45214|0.0|1.29002|1.52133	4.77	1.5	13	4
P00338	131	LDHA	LDHA_131	LDHA_HUMAN L-lactate dehydrogenase A chain OS=Homo sapiens OX=9606 GN=LDHA PE=1 SV=2	YSPNC(BTD[C])K|YSPNC(BTD[C])K|YSPNC(BTD[C])K|YSPNC(BTD[C])K	2|1|4|3	4.6|4.5|5.2|4.79	0.02828|NA|0.37749|0.38695	4.77	0.31	10	4
Q16186	88	ADRM1	ADRM1_88	ADRM1_HUMAN Proteasomal ubiquitin receptor ADRM1 OS=Homo sapiens OX=9606 GN=ADRM1 PE=1 SV=2	|RVPQC(BTD[C])PSGR||VPQC(BTD[C])PSGR	|1||1	|0.13||9.42	|NA||NA	4.78	6.57	2	2
Q9ULV4	420	CORO1C	CORO1C_420	COR1C_HUMAN Coronin-1C OS=Homo sapiens OX=9606 GN=CORO1C PE=1 SV=1	|KC(BTD[C])DLISIPK||	|1||	|4.79||	|NA||	4.79	NA	1	1
P31943	34	HNRNPH1	HNRNPH1_34	HNRH1_HUMAN Heterogeneous nuclear ribonucleoprotein H OS=Homo sapiens OX=9606 GN=HNRNPH1 PE=1 SV=4	||FFSDC(BTD[C])K|FFSDC(BTD[C])K	||1|1	||4.82|4.78	||NA|NA	4.8	0.03	2	2
P23528	39	CFL1	CFL1_39	COF1_HUMAN Cofilin-1 OS=Homo sapiens OX=9606 GN=CFL1 PE=1 SV=3	FC(BTD[C])LSEDKK VLFC(BTD[C])LSEDKK|LFC(BTD[C])LSEDKK VLFC(BTD[C])LSEDKK||LFC(BTD[C])LSEDKK VLFC(BTD[C])LSEDKK	2|3||2	6.245|3.68||4.52	3.14663|3.59375||1.85262	4.82	1.31	7	3
O75947	101	ATP5PD	ATP5PD_101	ATP5H_HUMAN ATP synthase subunit d, mitochondrial OS=Homo sapiens OX=9606 GN=ATP5PD PE=1 SV=3	||SC(BTD[C])AEWVSLSK|	||1|	||4.83|	||NA|	4.83	NA	1	1
Q9NZM1	409	MYOF	MYOF_409	MYOF_HUMAN Myoferlin OS=Homo sapiens OX=9606 GN=MYOF PE=1 SV=1	||KVC(BTD[C])TNIIEK|KVC(BTD[C])TNIIEK	||1|1	||4.31|5.41	||NA|NA	4.86	0.78	2	2
Q14152	198	EIF3A	EIF3A_198	EIF3A_HUMAN Eukaryotic translation initiation factor 3 subunit A OS=Homo sapiens OX=9606 GN=EIF3A PE=1 SV=1	||KLC(BTD[C])DNLR|	||1|	||4.89|	||NA|	4.89	NA	1	1
Q9UQ80	296	PA2G4	PA2G4_296	PA2G4_HUMAN Proliferation-associated protein 2G4 OS=Homo sapiens OX=9606 GN=PA2G4 PE=1 SV=3	|||MGVVEC(BTD[C])AK	|||2	|||4.89	|||3.02642	4.89	NA	2	1
Q16658	121	FSCN1	FSCN1_121	FSCN1_HUMAN Fascin OS=Homo sapiens OX=9606 GN=FSCN1 PE=1 SV=3	|||LSC(BTD[C])FAQTVSPAEK	|||1	|||4.9	|||NA	4.9	NA	1	1
P14625	138	HSP90B1	HSP90B1_138	ENPL_HUMAN Endoplasmin OS=Homo sapiens OX=9606 GN=HSP90B1 PE=1 SV=1	||IKC(BTD[C])DKEK|	||3|	||4.93|	||1.10274|	4.93	NA	3	1	Disulfide bond
P49419	70	ALDH7A1	ALDH7A1_70	AL7A1_HUMAN Alpha-aminoadipic semialdehyde dehydrogenase OS=Homo sapiens OX=9606 GN=ALDH7A1 PE=1 SV=5	||GEVITTYC(BTD[C])PANNEPIAR|GEVITTYC(BTD[C])PANNEPIAR	||1|1	||6.3|3.59	||NA|NA	4.95	1.92	2	2
P21333	574	FLNA	FLNA_574	FLNA_HUMAN Filamin-A OS=Homo sapiens OX=9606 GN=FLNA PE=1 SV=4	VGTEC(BTD[C])GNQK|||VGTEC(BTD[C])GNQK	1|||1	4.1|||5.83	NA|||NA	4.97	1.22	2	2
O43719	480	HTATSF1	HTATSF1_480	HTSF1_HUMAN HIV Tat-specific factor 1 OS=Homo sapiens OX=9606 GN=HTATSF1 PE=1 SV=1	|RGFEGSC(BTD[C])SQK||	|1||	|4.97||	|NA||	4.97	NA	1	1
Q6QNY0	168	BLOC1S3	BLOC1S3_168	BL1S3_HUMAN Biogenesis of lysosome-related organelles complex 1 subunit 3 OS=Homo sapiens OX=9606 GN=BLOC1S3 PE=1 SV=1	|GDLC(BTD[C])ALAER||	|1||	|4.97||	|NA||	4.97	NA	1	1
O00232	31	PSMD12	PSMD12_31	PSD12_HUMAN 26S proteasome non-ATPase regulatory subunit 12 OS=Homo sapiens OX=9606 GN=PSMD12 PE=1 SV=3	LPEC(BTD[C])AK|LPEC(BTD[C])AK|LPEC(BTD[C])AK|	2|2|1|	5.99|6.085|2.98|	0.0|0.78489|NA|	5.02	1.77	5	3
P62857	27	RPS28	RPS28_27	RS28_HUMAN 40S ribosomal protein S28 OS=Homo sapiens OX=9606 GN=RPS28 PE=1 SV=1	TGSQGQC(BTD[C])TQVR|GSQGQC(BTD[C])TQVR SQGQC(BTD[C])TQVR QGQC(BTD[C])TQVR|GSQGQC(BTD[C])TQVR TGSQGQC(BTD[C])TQVR|GSQGQC(BTD[C])TQVR TGSQGQC(BTD[C])TQVR	1|4|3|5	2.16|1.94|7.61|8.4	NA|1.81618|1.445|2.79197	5.03	3.45	13	4
P09211	48	GSTP1	GSTP1_48	GSTP1_HUMAN Glutathione S-transferase P OS=Homo sapiens OX=9606 GN=GSTP1 PE=1 SV=2	||SC(BTD[C])LYGQLPK|	||1|	||5.05|	||NA|	5.05	NA	1	1
Q12931	261	TRAP1	TRAP1_261	TRAP1_HUMAN Heat shock protein 75 kDa, mitochondrial OS=Homo sapiens OX=9606 GN=TRAP1 PE=1 SV=3	SDC(BTD[C])KEFSSEAR|||	2|||	5.055|||	3.5426|||	5.06	NA	2	1
P63220	56	RPS21	RPS21_56	RS21_HUMAN 40S ribosomal protein S21 OS=Homo sapiens OX=9606 GN=RPS21 PE=1 SV=1	YAIC(BTD[C])GAIR|||	1|||	5.06|||	NA|||	5.06	NA	1	1
P45974	195	USP5	USP5_195	UBP5_HUMAN Ubiquitin carboxyl-terminal hydrolase 5 OS=Homo sapiens OX=9606 GN=USP5 PE=1 SV=2	IPPC(BTD[C])GWK|IPPC(BTD[C])GWK||	1|1||	4.95|5.19||	NA|NA||	5.07	0.17	2	2	Disulfide bond
Q92973	806	TNPO1	TNPO1_806	TNPO1_HUMAN Transportin-1 OS=Homo sapiens OX=9606 GN=TNPO1 PE=1 SV=2	|PWC(BTD[C])TSLR||	|1||	|5.07||	|NA||	5.07	NA	1	1
Q13838	165	DDX39B	DDX39B_165	DX39B_HUMAN Spliceosome RNA helicase DDX39B OS=Homo sapiens OX=9606 GN=DDX39B PE=1 SV=1	NC(BTD[C])PHIVVGTPGR|NC(BTD[C])PHIVVGTPGR||	2|1||	5.41|4.74||	0.0|NA||	5.08	0.47	3	2
P00352	370	ALDH1A1	ALDH1A1_370	AL1A1_HUMAN Retinal dehydrogenase 1 OS=Homo sapiens OX=9606 GN=ALDH1A1 PE=1 SV=2	LEC(BTD[C])GGGPWGNK|LEC(BTD[C])GGGPWGNK|LEC(BTD[C])GGGPWGNK|LEC(BTD[C])GGGPWGNK	1|2|3|2	3.6|4.36|7.28|5.115	NA|0.01414|0.53594|3.18905	5.09	1.59	8	4
P49902	181	NT5C2	NT5C2_181	5NTC_HUMAN Cytosolic purine 5'-nucleotidase OS=Homo sapiens OX=9606 GN=NT5C2 PE=1 SV=1	||YTSC(BTD[C])ETGFK|	||1|	||5.09|	||NA|	5.09	NA	1	1
P26640	444	VARS	VARS_444	SYVC_HUMAN Valine--tRNA ligase OS=Homo sapiens OX=9606 GN=VARS PE=1 SV=4	|||AC(BTD[C])FTMDPK	|||1	|||5.11	|||NA	5.11	NA	1	1
P27708	758	CAD	CAD_758	PYR1_HUMAN CAD protein OS=Homo sapiens OX=9606 GN=CAD PE=1 SV=3	IGSC(BTD[C])MK|IGSC(BTD[C])MK|IGSC(BTD[C])MK|	1|1|1|	3.1|5.11|7.17|	NA|NA|NA|	5.13	2.04	3	3
P14618	49	PKM	PKM_49	KPYM_HUMAN Pyruvate kinase PKM OS=Homo sapiens OX=9606 GN=PKM PE=1 SV=4	IIC(BTD[C])TIGPASR NTGIIC(BTD[C])TIGPASR|IIC(BTD[C])TIGPASR NTGIIC(BTD[C])TIGPASR|IIC(BTD[C])TIGPASR|IIC(BTD[C])TIGPASR NTGIIC(BTD[C])TIGPASR	4|3|1|2	5.98|5.79|4.15|4.64	0.015|1.32213|NA|2.06475	5.14	0.89	10	4
Q13423	1073	NNT	NNT_1073	NNTM_HUMAN NAD(P) transhydrogenase, mitochondrial OS=Homo sapiens OX=9606 GN=NNT PE=1 SV=3	KTC(BTD[C])DALQAK|KTC(BTD[C])DALQAK||	3|2||	5.76|4.535||	0.31432|0.4879||	5.15	0.87	5	2
P23396	97	RPS3	RPS3_97	RS3_HUMAN 40S ribosomal protein S3 OS=Homo sapiens OX=9606 GN=RPS3 PE=1 SV=2	GLC(BTD[C])AIAQAESLR||GLC(BTD[C])AIAQAESLR|GLC(BTD[C])AIAQAESLR	2||3|1	4.37||2.6|8.54	0.02828||0.60044|NA	5.17	3.05	6	3
P05023	211	ATP1A1	ATP1A1_211	AT1A1_HUMAN Sodium/potassium-transporting ATPase subunit alpha-1 OS=Homo sapiens OX=9606 GN=ATP1A1 PE=1 SV=1	IISANGC(BTD[C])K|IISANGC(BTD[C])K||IISANGC(BTD[C])K	1|2||1	3.87|2.495||9.15	NA|0.34648||NA	5.17	3.51	4	3
P40938	11	RFC3	RFC3_11	RFC3_HUMAN Replication factor C subunit 3 OS=Homo sapiens OX=9606 GN=RFC3 PE=1 SV=2	YRPC(BTD[C])SLGR|||	1|||	5.19|||	NA|||	5.19	NA	1	1
P10599	35	TXN	TXN_35	THIO_HUMAN Thioredoxin OS=Homo sapiens OX=9606 GN=TXN PE=1 SV=3	|FSATWCGPC(BTD[C])K||	|1||	|5.2||	|NA||	5.2	NA	1	1	Active site, Disulfide bond
O95336	32	PGLS	PGLS_32	6PGL_HUMAN 6-phosphogluconolactonase OS=Homo sapiens OX=9606 GN=PGLS PE=1 SV=2	|AC(BTD[C])CLAGAR||AC(BTD[C])CLAGAR	|1||1	|3.73||6.72	|NA||NA	5.23	2.11	2	2
Q7Z4S6	1144	KIF21A	KIF21A_1144	KI21A_HUMAN Kinesin-like protein KIF21A OS=Homo sapiens OX=9606 GN=KIF21A PE=1 SV=2	LC(BTD[C])GEVKPK|LC(BTD[C])GEVKPK||	1|1||	6.79|3.67||	NA|NA||	5.23	2.21	2	2
P09382	61	LGALS1	LGALS1_61	LEG1_HUMAN Galectin-1 OS=Homo sapiens OX=9606 GN=LGALS1 PE=1 SV=2	||FNAHGDANTIVC(BTD[C])NSK|	||1|	||5.24|	||NA|	5.24	NA	1	1
O75116	649	ROCK2	ROCK2_649	ROCK2_HUMAN Rho-associated protein kinase 2 OS=Homo sapiens OX=9606 GN=ROCK2 PE=1 SV=4	IC(BTD[C])GLEEDLK|IC(BTD[C])GLEEDLK|IC(BTD[C])GLEEDLK|IC(BTD[C])GLEEDLK	1|2|2|3	4.67|4.8|6.21|5.32	NA|0.0|2.786|1.36647	5.25	0.7	8	4
Q5U5X0	97	LYRM7	LYRM7_97	LYRM7_HUMAN Complex III assembly factor LYRM7 OS=Homo sapiens OX=9606 GN=LYRM7 PE=1 SV=1	KDLLVENVPYC(BTD[C])DAPTQK|KDLLVENVPYC(BTD[C])DAPTQK||	1|1||	4.92|5.62||	NA|NA||	5.27	0.49	2	2
Q9NQC3	1101	RTN4	RTN4_1101	RTN4_HUMAN Reticulon-4 OS=Homo sapiens OX=9606 GN=RTN4 PE=1 SV=2	YSNSALGHVNC(BTD[C])TIK|||YSNSALGHVNC(BTD[C])TIK	1|||1	6.21|||4.34	NA|||NA	5.28	1.32	2	2
P49189	45	ALDH9A1	ALDH9A1_45	AL9A1_HUMAN 4-trimethylaminobutyraldehyde dehydrogenase OS=Homo sapiens OX=9606 GN=ALDH9A1 PE=1 SV=3	||IATFTC(BTD[C])SGEK|VIATFTC(BTD[C])SGEK	||1|2	||4.92|5.65	||NA|0.02828	5.29	0.52	3	2
O00410	110	IPO5	IPO5_110	IPO5_HUMAN Importin-5 OS=Homo sapiens OX=9606 GN=IPO5 PE=1 SV=4	|KVC(BTD[C])DIAAELAR||	|1||	|5.34||	|NA||	5.34	NA	1	1
Q9BTE3	239	MCMBP	MCMBP_239	MCMBP_HUMAN Mini-chromosome maintenance complex-binding protein OS=Homo sapiens OX=9606 GN=MCMBP PE=1 SV=2	||GPAC(BTD[C])LVK|	||1|	||5.34|	||NA|	5.34	NA	1	1
P27348	25	YWHAQ	YWHAQ_25	1433T_HUMAN 14-3-3 protein theta OS=Homo sapiens OX=9606 GN=YWHAQ PE=1 SV=1	YDDMATC(BTD[C])MK|YDDMATC(BTD[C])MK|YDDMATC(BTD[C])MK|YDDMATC(BTD[C])MK	1|1|3|6	5.84|2.89|5.86|6.81	NA|NA|2.26809|1.77311	5.35	1.7	11	4
P47756	206	CAPZB	CAPZB_206	CAPZB_HUMAN F-actin-capping protein subunit beta OS=Homo sapiens OX=9606 GN=CAPZB PE=1 SV=4	QMEKDETVSDC(BTD[C])SPHIANIGR||QMEKDETVSDC(BTD[C])SPHIANIGR|QMEKDETVSDC(BTD[C])SPHIANIGR	1||1|1	6.68||7.66|1.77	NA||NA|NA	5.37	3.16	3	3
P09874	845	PARP1	PARP1_845	PARP1_HUMAN Poly [ADP-ribose] polymerase 1 OS=Homo sapiens OX=9606 GN=PARP1 PE=1 SV=4	|||EGEC(BTD[C])QR	|||1	|||5.37	|||NA	5.37	NA	1	1
P43246	873	MSH2	MSH2_873	MSH2_HUMAN DNA mismatch repair protein Msh2 OS=Homo sapiens OX=9606 GN=MSH2 PE=1 SV=1	KC(BTD[C])YLER|KC(BTD[C])YLER||	1|1||	5.29|5.48||	NA|NA||	5.39	0.13	2	2
P49458	39	SRP9	SRP9_39	SRP09_HUMAN Signal recognition particle 9 kDa protein OS=Homo sapiens OX=9606 GN=SRP9 PE=1 SV=2	||HSDGNLC(BTD[C])VK|HSDGNLC(BTD[C])VK	||2|1	||5.27|5.57	||1.41421|NA	5.42	0.21	3	2
O75390	211	CS	CS_211	CISY_HUMAN Citrate synthase, mitochondrial OS=Homo sapiens OX=9606 GN=CS PE=1 SV=2	|||LPC(BTD[C])VAAK	|||1	|||5.44	|||NA	5.44	NA	1	1
Q9UMY4	67	SNX12	SNX12_67	SNX12_HUMAN Sorting nexin-12 OS=Homo sapiens OX=9606 GN=SNX12 PE=1 SV=4	LKESC(BTD[C])VR|||	1|||	5.45|||	NA|||	5.45	NA	1	1
P11597	350	CETP	CETP_350	CETP_HUMAN Cholesteryl ester transfer protein OS=Homo sapiens OX=9606 GN=CETP PE=1 SV=2	ISC(BTD[C])QNK|ISC(BTD[C])QNK||	1|1||	5.62|5.34||	NA|NA||	5.48	0.2	2	2
P30101	92	PDIA3	PDIA3_92	PDIA3_HUMAN Protein disulfide-isomerase A3 OS=Homo sapiens OX=9606 GN=PDIA3 PE=1 SV=4	|||VDCTANTNTC(BTD[C])NK	|||1	|||5.48	|||NA	5.48	NA	1	1	Disulfide bond
Q16543	64	CDC37	CDC37_64	CDC37_HUMAN Hsp90 co-chaperone Cdc37 OS=Homo sapiens OX=9606 GN=CDC37 PE=1 SV=1	|VAEC(BTD[C])QR|KVAEC(BTD[C])QR|KVAEC(BTD[C])QR	|2|1|1	|4.73|5.6|6.17	|0.0|NA|NA	5.5	0.73	4	3
Q96GG9	115	DCUN1D1	DCUN1D1_115	DCNL1_HUMAN DCN1-like protein 1 OS=Homo sapiens OX=9606 GN=DCUN1D1 PE=1 SV=1	||AATQC(BTD[C])EFSK|	||1|	||5.51|	||NA|	5.51	NA	1	1
P49915	523	GMPS	GMPS_523	GUAA_HUMAN GMP synthase [glutamine-hydrolyzing] OS=Homo sapiens OX=9606 GN=GMPS PE=1 SV=1	TVGVQGDC(BTD[C])R|||	1|||	5.54|||	NA|||	5.54	NA	1	1
Q12931	573	TRAP1	TRAP1_573	TRAP1_HUMAN Heat shock protein 75 kDa, mitochondrial OS=Homo sapiens OX=9606 GN=TRAP1 PE=1 SV=3	SPAAEC(BTD[C])LSEK|SPAAEC(BTD[C])LSEK||	2|1||	4.97|6.15||	0.0|NA||	5.56	0.83	3	2
Q92947	75	GCDH	GCDH_75	GCDH_HUMAN Glutaryl-CoA dehydrogenase, mitochondrial OS=Homo sapiens OX=9606 GN=GCDH PE=1 SV=1	||TYC(BTD[C])QER|	||1|	||5.58|	||NA|	5.58	NA	1	1
O75534	739	CSDE1	CSDE1_739	CSDE1_HUMAN Cold shock domain-containing protein E1 OS=Homo sapiens OX=9606 GN=CSDE1 PE=1 SV=2	||VC(BTD[C])EGPK|	||1|	||5.6|	||NA|	5.6	NA	1	1
P50416	742	CPT1A	CPT1A_742	CPT1A_HUMAN Carnitine O-palmitoyltransferase 1, liver isoform OS=Homo sapiens OX=9606 GN=CPT1A PE=1 SV=2	||FSC(BTD[C])PETDSHR|FSC(BTD[C])PETDSHR	||1|1	||5.98|5.25	||NA|NA	5.62	0.52	2	2
O95671	4	ASMTL	ASMTL_4	ASML_HUMAN Probable bifunctional dTTP/UTP pyrophosphatase/methyltransferase protein OS=Homo sapiens OX=9606 GN=ASMTL PE=1 SV=3	VLC(BTD[C])PVIGK|VLC(BTD[C])PVIGK||	1|1||	7.26|3.99||	NA|NA||	5.63	2.31	2	2
P41091	348	EIF2S3	EIF2S3_348	IF2G_HUMAN Eukaryotic translation initiation factor 2 subunit 3 OS=Homo sapiens OX=9606 GN=EIF2S3 PE=1 SV=3	||IDPTLC(BTD[C])R|	||3|	||5.64|	||0.65241|	5.64	NA	3	1
P52888	246	THOP1	THOP1_246	THOP1_HUMAN Thimet oligopeptidase OS=Homo sapiens OX=9606 GN=THOP1 PE=1 SV=2	|||KVEEAFNC(BTD[C])R	|||1	|||5.64	|||NA	5.64	NA	1	1
P17081	163	RHOQ	RHOQ_163	RHOQ_HUMAN Rho-related GTP-binding protein RhoQ OS=Homo sapiens OX=9606 GN=RHOQ PE=1 SV=2	||YVEC(BTD[C])SALTQK|YVEC(BTD[C])SALTQK	||2|1	||4.74|6.57	||0.94752|NA	5.66	1.29	3	2
Q02543	137	RPL18A	RPL18A_137	RL18A_HUMAN 60S ribosomal protein L18a OS=Homo sapiens OX=9606 GN=RPL18A PE=1 SV=2	||VEEIAASKC(BTD[C])R|	||1|	||5.68|	||NA|	5.68	NA	1	1
P15121	299	AKR1B1	AKR1B1_299	ALDR_HUMAN Aldo-keto reductase family 1 member B1 OS=Homo sapiens OX=9606 GN=AKR1B1 PE=1 SV=3	VC(BTD[C])ALLSCTSHK|VC(BTD[C])ALLSCTSHK|VC(BTD[C])ALLSCTSHK|VC(BTD[C])ALLSCTSHK	2|3|1|1	6.95|7.14|4.03|4.65	0.0|0.13856|NA|NA	5.69	1.58	7	4
O14929	168	HAT1	HAT1_168	HAT1_HUMAN Histone acetyltransferase type B catalytic subunit OS=Homo sapiens OX=9606 GN=HAT1 PE=1 SV=1	||ADMTC(BTD[C])R|ADMTC(BTD[C])R	||1|2	||5.19|6.245	||NA|0.4879	5.72	0.75	3	2
Q9BUF5	12	TUBB6	TUBB6_12	TBB6_HUMAN Tubulin beta-6 chain OS=Homo sapiens OX=9606 GN=TUBB6 PE=1 SV=1	IVHIQAGQC(BTD[C])GNQIGTK|||	1|||	5.74|||	NA|||	5.74	NA	1	1
P49721	91	PSMB2	PSMB2_91	PSB2_HUMAN Proteasome subunit beta type-2 OS=Homo sapiens OX=9606 GN=PSMB2 PE=1 SV=1	RNLADC(BTD[C])LR||NLADC(BTD[C])LR|	1||2|	3.2||8.33|	NA||0.0|	5.77	3.63	3	2
P49327	1881	FASN	FASN_1881	FAS_HUMAN Fatty acid synthase OS=Homo sapiens OX=9606 GN=FASN PE=1 SV=3	||TFC(BTD[C])PAHK|TFC(BTD[C])PAHK	||1|1	||3.84|7.7	||NA|NA	5.77	2.73	2	2
P23528	139	CFL1	CFL1_139	COF1_HUMAN Cofilin-1 OS=Homo sapiens OX=9606 GN=CFL1 PE=1 SV=3	|HELQANC(BTD[C])YEEVKDR|HELQANC(BTD[C])YEEVKDR|HELQANC(BTD[C])YEEVKDR	|1|1|1	|6.83|7.68|2.81	|NA|NA|NA	5.77	2.6	3	3
O60841	1158	EIF5B	EIF5B_1158	IF2P_HUMAN Eukaryotic translation initiation factor 5B OS=Homo sapiens OX=9606 GN=EIF5B PE=1 SV=4	KGQEVC(BTD[C])VK||KGQEVC(BTD[C])VK|KGQEVC(BTD[C])VK	2||1|1	3.475||7.27|6.59	1.94454||NA|NA	5.78	2.02	4	3
P16615	447	ATP2A2	ATP2A2_447	AT2A2_HUMAN Sarcoplasmic/endoplasmic reticulum calcium ATPase 2 OS=Homo sapiens OX=9606 GN=ATP2A2 PE=1 SV=1	||VGEATETALTC(BTD[C])LVEK|	||1|	||5.78|	||NA|	5.78	NA	1	1
P33992	197	MCM5	MCM5_197	MCM5_HUMAN DNA replication licensing factor MCM5 OS=Homo sapiens OX=9606 GN=MCM5 PE=1 SV=5	KC(BTD[C])NTDQAGRPK|KC(BTD[C])NTDQAGRPK||	1|1||	6.47|5.1||	NA|NA||	5.79	0.97	2	2
P83881	77	RPL36A	RPL36A_77	RL36A_HUMAN 60S ribosomal protein L36a OS=Homo sapiens OX=9606 GN=RPL36A PE=1 SV=2	|LECVEPNC(BTD[C])R||	|1||	|5.79||	|NA||	5.79	NA	1	1
Q9Y383	348	LUC7L2	LUC7L2_348	LC7L2_HUMAN Putative RNA-binding protein Luc7-like 2 OS=Homo sapiens OX=9606 GN=LUC7L2 PE=1 SV=2	FRDQDLASC(BTD[C])DR|||	1|||	5.81|||	NA|||	5.81	NA	1	1
Q9NQZ5	362	STARD7	STARD7_362	STAR7_HUMAN StAR-related lipid transfer protein 7, mitochondrial OS=Homo sapiens OX=9606 GN=STARD7 PE=1 SV=2	|KNEGSC(BTD[C])GPAR||	|1||	|5.86||	|NA||	5.86	NA	1	1
Q86Y56	349	DNAAF5	DNAAF5_349	DAAF5_HUMAN Dynein assembly factor 5, axonemal OS=Homo sapiens OX=9606 GN=DNAAF5 PE=1 SV=4	|RPVLGC(BTD[C])R||	|1||	|5.89||	|NA||	5.89	NA	1	1
Q09666	2806	AHNAK	AHNAK_2806	AHNK_HUMAN Neuroblast differentiation-associated protein AHNAK OS=Homo sapiens OX=9606 GN=AHNAK PE=1 SV=2	||VDVEC(BTD[C])PDVNIEGPEGK|	||1|	||5.96|	||NA|	5.96	NA	1	1
P12004	62	PCNA	PCNA_62	PCNA_HUMAN Proliferating cell nuclear antigen OS=Homo sapiens OX=9606 GN=PCNA PE=1 SV=1	|SEGFDTYRC(BTD[C])DR|SEGFDTYRC(BTD[C])DR|SEGFDTYRC(BTD[C])DR	|1|1|1	|5.71|5.73|6.59	|NA|NA|NA	6.01	0.5	3	3
P23526	195	AHCY	AHCY_195	SAHH_HUMAN Adenosylhomocysteinase OS=Homo sapiens OX=9606 GN=AHCY PE=1 SV=4	FDNLYGC(BTD[C])R|||	1|||	6.02|||	NA|||	6.02	NA	1	1
Q9NZM1	1919	MYOF	MYOF_1919	MYOF_HUMAN Myoferlin OS=Homo sapiens OX=9606 GN=MYOF PE=1 SV=1	|||SPEKC(BTD[C])R	|||3	|||6.04	|||0.31754	6.04	NA	3	1
Q00325	237	SLC25A3	SLC25A3_237	MPCP_HUMAN Phosphate carrier protein, mitochondrial OS=Homo sapiens OX=9606 GN=SLC25A3 PE=1 SV=2	|FAC(BTD[C])FER||	|2||	|6.075||	|3.31633||	6.08	NA	2	1
P49321	254	NASP	NASP_254	NASP_HUMAN Nuclear autoantigenic sperm protein OS=Homo sapiens OX=9606 GN=NASP PE=1 SV=2	|SVSGTDVQEEC(BTD[C])R||	|2||	|6.155||	|0.2192||	6.16	NA	2	1
Q96TA1	405	NIBAN2	NIBAN2_405	NIBA2_HUMAN Protein Niban 2 OS=Homo sapiens OX=9606 GN=NIBAN2 PE=1 SV=3	||MQSC(BTD[C])YEK|	||1|	||6.16|	||NA|	6.16	NA	1	1
P23284	202	PPIB	PPIB_202	PPIB_HUMAN Peptidyl-prolyl cis-trans isomerase B OS=Homo sapiens OX=9606 GN=PPIB PE=1 SV=2	||DVIIADC(BTD[C])GK|DVIIADC(BTD[C])GK	||1|1	||4.95|7.42	||NA|NA	6.19	1.75	2	2	Modified residue
P30101	85	PDIA3	PDIA3_85	PDIA3_HUMAN Protein disulfide-isomerase A3 OS=Homo sapiens OX=9606 GN=PDIA3 PE=1 SV=4	||VDC(BTD[C])TANTNTCNK|VDC(BTD[C])TANTNTCNK	||1|2	||5.66|6.75	||NA|0.0	6.21	0.77	3	2	Disulfide bond
Q13616	149	CUL1	CUL1_149	CUL1_HUMAN Cullin-1 OS=Homo sapiens OX=9606 GN=CUL1 PE=1 SV=2	REC(BTD[C])DEGR|REC(BTD[C])DEGRK||	1|1||	7.36|5.12||	NA|NA||	6.24	1.58	2	2
Q9UNM6	114	PSMD13	PSMD13_114	PSD13_HUMAN 26S proteasome non-ATPase regulatory subunit 13 OS=Homo sapiens OX=9606 GN=PSMD13 PE=1 SV=2	|||SSDEAVILC(BTD[C])K	|||1	|||6.25	|||NA	6.25	NA	1	1
O60502	631	OGA	OGA_631	OGA_HUMAN Protein O-GlcNAcase OS=Homo sapiens OX=9606 GN=OGA PE=1 SV=2	|||LSNC(BTD[C])ANR	|||1	|||6.26	|||NA	6.26	NA	1	1
P30041	47	PRDX6	PRDX6_47	PRDX6_HUMAN Peroxiredoxin-6 OS=Homo sapiens OX=9606 GN=PRDX6 PE=1 SV=3	FTPVC(BTD[C])TTELGR||FTPVC(BTD[C])TTELGR DFTPVC(BTD[C])TTELGR|FTPVC(BTD[C])TTELGR	2||3|1	5.99||4.73|8.07	0.0||1.17202|NA	6.26	1.69	6	3	Active site
Q16643	96	DBN1	DBN1_96	DREB_HUMAN Drebrin OS=Homo sapiens OX=9606 GN=DBN1 PE=1 SV=4	KC(BTD[C])ACASHVAK|KC(BTD[C])ACASHVAK||	1|1||	8.13|4.42||	NA|NA||	6.28	2.62	2	2
P53041	11	PPP5C	PPP5C_11	PPP5_HUMAN Serine/threonine-protein phosphatase 5 OS=Homo sapiens OX=9606 GN=PPP5C PE=1 SV=1	||TEC(BTD[C])AEPPRDEPPADGALK|TEC(BTD[C])AEPPRDEPPADGALK	||1|1	||0.71|11.86	||NA|NA	6.29	7.88	2	2
Q00577	272	PURA	PURA_272	PURA_HUMAN Transcriptional activator protein Pur-alpha OS=Homo sapiens OX=9606 GN=PURA PE=1 SV=2	|FGHTFC(BTD[C])K||	|1||	|6.3||	|NA||	6.3	NA	1	1
Q96EY4	162	TMA16	TMA16_162	TMA16_HUMAN Translation machinery-associated protein 16 OS=Homo sapiens OX=9606 GN=TMA16 PE=1 SV=2	KIC(BTD[C])ANDAIPK|||	2|||	6.325|||	1.20915|||	6.33	NA	2	1
O95347	800	SMC2	SMC2_800	SMC2_HUMAN Structural maintenance of chromosomes protein 2 OS=Homo sapiens OX=9606 GN=SMC2 PE=1 SV=2	KLDC(BTD[C])AK|KLDC(BTD[C])AK|KLDC(BTD[C])AK|KLDC(BTD[C])AK	3|3|1|1	2.52|3.93|12.67|6.23	1.0681|0.52205|NA|NA	6.34	4.49	8	4
P49207	46	RPL34	RPL34_46	RL34_HUMAN 60S ribosomal protein L34 OS=Homo sapiens OX=9606 GN=RPL34 PE=1 SV=3	AC(BTD[C])GVCPGR|AC(BTD[C])GVCPGR|AC(BTD[C])GVCPGR SAC(BTD[C])GVCPGR|AC(BTD[C])GVCPGR	2|1|2|1	7.135|7.11|5.9|5.23	0.00707|NA|0.45255|NA	6.34	0.94	6	4
P00352	186	ALDH1A1	ALDH1A1_186	AL1A1_HUMAN Retinal dehydrogenase 1 OS=Homo sapiens OX=9606 GN=ALDH1A1 PE=1 SV=2	||IGPALSC(BTD[C])GNTVVVK|IGPALSC(BTD[C])GNTVVVK	||1|1	||6.35|6.41	||NA|NA	6.38	0.04	2	2
P63092	3	GNAS	GNAS_3	GNAS2_HUMAN Guanine nucleotide-binding protein G(s) subunit alpha isoforms short OS=Homo sapiens OX=9606 GN=GNAS PE=1 SV=1	|GC(BTD[C])LGNSK|GC(BTD[C])LGNSK|GC(BTD[C])LGNSK	|1|1|1	|6.55|6.07|6.55	|NA|NA|NA	6.39	0.28	3	3
Q15185	40	PTGES3	PTGES3_40	TEBP_HUMAN Prostaglandin E synthase 3 OS=Homo sapiens OX=9606 GN=PTGES3 PE=1 SV=1	|FSC(BTD[C])LGGSDNFK|FSC(BTD[C])LGGSDNFK|FSC(BTD[C])LGGSDNFK	|1|1|1	|10.46|4.36|4.44	|NA|NA|NA	6.42	3.5	3	3
Q92945	176	KHSRP	KHSRP_176	FUBP2_HUMAN Far upstream element-binding protein 2 OS=Homo sapiens OX=9606 GN=KHSRP PE=1 SV=4	||IQQDSGC(BTD[C])K|IQQDSGC(BTD[C])K	||1|1	||6.55|6.35	||NA|NA	6.45	0.14	2	2
Q9P0L0	179	VAPA	VAPA_179	VAPA_HUMAN Vesicle-associated membrane protein-associated protein A OS=Homo sapiens OX=9606 GN=VAPA PE=1 SV=3	KLMEEC(BTD[C])K|KLMEEC(BTD[C])K|KLMEEC(BTD[C])K|KLMEEC(BTD[C])K LMEEC(BTD[C])K	1|1|1|2	7.88|5.66|5.87|6.4	NA|NA|NA|4.56791	6.45	1	5	4
Q9HD42	44	CHMP1A	CHMP1A_44	CHM1A_HUMAN Charged multivesicular body protein 1a OS=Homo sapiens OX=9606 GN=CHMP1A PE=1 SV=1	NVEC(BTD[C])AR|NVEC(BTD[C])AR||	1|1||	7.95|5.05||	NA|NA||	6.5	2.05	2	2
Q96KB5	70	PBK	PBK_70	TOPK_HUMAN Lymphokine-activated killer T-cell-originated protein kinase OS=Homo sapiens OX=9606 GN=PBK PE=1 SV=3	INPIC(BTD[C])NDHYR|||	1|||	6.51|||	NA|||	6.51	NA	1	1
P42704	571	LRPPRC	LRPPRC_571	LPPRC_HUMAN Leucine-rich PPR motif-containing protein, mitochondrial OS=Homo sapiens OX=9606 GN=LRPPRC PE=1 SV=3	YC(BTD[C])QEPR|YC(BTD[C])QEPR||YC(BTD[C])QEPR	1|1||2	7.39|6.04||6.17	NA|NA||0.0	6.53	0.74	4	3
P63220	17	RPS21	RPS21_17	RS21_HUMAN 40S ribosomal protein S21 OS=Homo sapiens OX=9606 GN=RPS21 PE=1 SV=1	KC(BTD[C])SASNR|KC(BTD[C])SASNR|KC(BTD[C])SASNR|KC(BTD[C])SASNR	1|2|3|2	5.16|5.065|7.3|8.63	NA|0.00707|0.91221|0.83439	6.54	1.73	8	4
P13639	41	EEF2	EEF2_41	EF2_HUMAN Elongation factor 2 OS=Homo sapiens OX=9606 GN=EEF2 PE=1 SV=4	LTDSLVC(BTD[C])K STLTDSLVC(BTD[C])K|LTDSLVC(BTD[C])K TLTDSLVC(BTD[C])K STLTDSLVC(BTD[C])K|LTDSLVC(BTD[C])K TLTDSLVC(BTD[C])K|TDSLVC(BTD[C])K LTDSLVC(BTD[C])K TLTDSLVC(BTD[C])K STLTDSLVC(BTD[C])K	6|5|4|5	1.155|4.5|7.76|12.99	1.83155|1.7887|4.72749|1.28216	6.6	5.04	20	4
Q00610	870	CLTC	CLTC_870	CLH1_HUMAN Clathrin heavy chain 1 OS=Homo sapiens OX=9606 GN=CLTC PE=1 SV=5	IHEGC(BTD[C])EEPATHNALAK|IHEGC(BTD[C])EEPATHNALAK|IHEGC(BTD[C])EEPATHNALAK|IHEGC(BTD[C])EEPATHNALAK	2|1|3|1	4.39|4.2|8.48|9.36	0.89095|NA|1.92835|NA	6.61	2.7	7	4
Q07020	134	RPL18	RPL18_134	RL18_HUMAN 60S ribosomal protein L18 OS=Homo sapiens OX=9606 GN=RPL18 PE=1 SV=2	GC(BTD[C])GTVLLSGPR||GC(BTD[C])GTVLLSGPR|	2||2|	6.88||6.44|	0.29698||0.77782|	6.66	0.31	4	2
P22061	102	PCMT1	PCMT1_102	PIMT_HUMAN Protein-L-isoaspartate(D-aspartate) O-methyltransferase OS=Homo sapiens OX=9606 GN=PCMT1 PE=1 SV=4	|MVGC(BTD[C])TGK|MVGC(BTD[C])TGK|MVGC(BTD[C])TGK	|2|1|2	|4.85|5.64|9.57	|0.0|NA|5.99627	6.69	2.53	5	3
P09525	198	ANXA4	ANXA4_198	ANXA4_HUMAN Annexin A4 OS=Homo sapiens OX=9606 GN=ANXA4 PE=1 SV=4	FLTVLC(BTD[C])SR|||	1|||	6.7|||	NA|||	6.7	NA	1	1
Q02878	44	RPL6	RPL6_44	RL6_HUMAN 60S ribosomal protein L6 OS=Homo sapiens OX=9606 GN=RPL6 PE=1 SV=3	GKPHC(BTD[C])SR|GKPHC(BTD[C])SR||	2|1||	4.835|8.59||	5.21138|NA||	6.71	2.66	3	2
Q9HDC9	409	APMAP	APMAP_409	APMAP_HUMAN Adipocyte plasma membrane-associated protein OS=Homo sapiens OX=9606 GN=APMAP PE=1 SV=2	||SPFLC(BTD[C])R|	||1|	||6.72|	||NA|	6.72	NA	1	1
Q99497	53	PARK7	PARK7_53	PARK7_HUMAN Protein/nucleic acid deglycase DJ-1 OS=Homo sapiens OX=9606 GN=PARK7 PE=1 SV=2	|||DVVIC(BTD[C])PDASLEDAK	|||1	|||6.73	|||NA	6.73	NA	1	1
Q08J23	502	NSUN2	NSUN2_502	NSUN2_HUMAN tRNA (cytosine(34)-C(5))-methyltransferase OS=Homo sapiens OX=9606 GN=NSUN2 PE=1 SV=2	KDGVC(BTD[C])GPPPSK|||	1|||	6.76|||	NA|||	6.76	NA	1	1
P62829	125	RPL23	RPL23_125	RL23_HUMAN 60S ribosomal protein L23 OS=Homo sapiens OX=9606 GN=RPL23 PE=1 SV=1	||EC(BTD[C])ADLWPR|	||1|	||6.82|	||NA|	6.82	NA	1	1
P34897	412	SHMT2	SHMT2_412	GLYM_HUMAN Serine hydroxymethyltransferase, mitochondrial OS=Homo sapiens OX=9606 GN=SHMT2 PE=1 SV=3	|||NTC(BTD[C])PGDR	|||1	|||6.82	|||NA	6.82	NA	1	1
A8MWL6	68	N/A	N/A	SNG2L_HUMAN Putative synaptogyrin-2 like protein OS=Homo sapiens OX=9606 PE=5 SV=1	NEDAC(BTD[C])R|||NEDAC(BTD[C])R	1|||1	8.2|||5.46	NA|||NA	6.83	1.94	2	2
Q13418	346	ILK	ILK_346	ILK_HUMAN Integrin-linked protein kinase OS=Homo sapiens OX=9606 GN=ILK PE=1 SV=2	|FSFQC(BTD[C])PGR||	|1||	|6.85||	|NA||	6.85	NA	1	1
Q9BTE3	396	MCMBP	MCMBP_396	MCMBP_HUMAN Mini-chromosome maintenance complex-binding protein OS=Homo sapiens OX=9606 GN=MCMBP PE=1 SV=2	FTVNLSGC(BTD[C])PR|||	1|||	6.86|||	NA|||	6.86	NA	1	1
Q6PD62	1052	CTR9	CTR9_1052	CTR9_HUMAN RNA polymerase-associated protein CTR9 homolog OS=Homo sapiens OX=9606 GN=CTR9 PE=1 SV=1	KKC(BTD[C])ASSESDSDENQNK|||	1|||	6.88|||	NA|||	6.88	NA	1	1
Q13310	132	PABPC4	PABPC4_132	PABP4_HUMAN Polyadenylate-binding protein 4 OS=Homo sapiens OX=9606 GN=PABPC4 PE=1 SV=1	|VVC(BTD[C])DENGSK|VVC(BTD[C])DENGSK|VVC(BTD[C])DENGSK	|2|2|1	|4.89|5.325|10.66	|0.0|0.84146|NA	6.96	3.21	5	3
Q9BXJ9	721	NAA15	NAA15_721	NAA15_HUMAN N-alpha-acetyltransferase 15, NatA auxiliary subunit OS=Homo sapiens OX=9606 GN=NAA15 PE=1 SV=1	|LFNTAVC(BTD[C])ESK||	|1||	|6.97||	|NA||	6.97	NA	1	1
P27708	897	CAD	CAD_897	PYR1_HUMAN CAD protein OS=Homo sapiens OX=9606 GN=CAD PE=1 SV=3	||QELGIC(BTD[C])PAVK|QELGIC(BTD[C])PAVK	||1|1	||6.5|7.46	||NA|NA	6.98	0.68	2	2
P22102	168	GART	GART_168	PUR2_HUMAN Trifunctional purine biosynthetic protein adenosine-3 OS=Homo sapiens OX=9606 GN=GART PE=1 SV=1	||SKEEAC(BTD[C])K|SKEEAC(BTD[C])K	||2|1	||6.865|7.26	||0.3182|NA	7.06	0.28	3	2
P30519	265	HMOX2	HMOX2_265	HMOX2_HUMAN Heme oxygenase 2 OS=Homo sapiens OX=9606 GN=HMOX2 PE=1 SV=2	KC(BTD[C])PFYAAEQDK|KC(BTD[C])PFYAAEQDK||KC(BTD[C])PFYAAEQDK	2|1||1	7.465|7.84||6.05	3.16077|NA||NA	7.12	0.94	4	3
P13639	67	EEF2	EEF2_67	EF2_HUMAN Elongation factor 2 OS=Homo sapiens OX=9606 GN=EEF2 PE=1 SV=4	KDEQERC(BTD[C])ITIK DEQERC(BTD[C])ITIK|KDEQERC(BTD[C])ITIK DEQERC(BTD[C])ITIK|KDEQERC(BTD[C])ITIK|KDEQERC(BTD[C])ITIK DEQERC(BTD[C])ITIK	4|3|3|4	5.825|6.36|8.91|7.68	3.27461|1.72541|3.45833|3.43536	7.19	1.38	14	4
P49321	708	NASP	NASP_708	NASP_HUMAN Nuclear autoantigenic sperm protein OS=Homo sapiens OX=9606 GN=NASP PE=1 SV=2	KPTDGASSSNC(BTD[C])VTDISHLVR|KPTDGASSSNC(BTD[C])VTDISHLVR||	1|1||	10.56|3.99||	NA|NA||	7.28	4.65	2	2
O00148	238	DDX39A	DDX39A_238	DX39A_HUMAN ATP-dependent RNA helicase DDX39A OS=Homo sapiens OX=9606 GN=DDX39A PE=1 SV=2	|||DIRPVC(BTD[C])R	|||1	|||7.32	|||NA	7.32	NA	1	1
O00148	164	DDX39A	DDX39A_164	DX39A_HUMAN ATP-dependent RNA helicase DDX39A OS=Homo sapiens OX=9606 GN=DDX39A PE=1 SV=2	NC(BTD[C])PHVVVGTPGR|NC(BTD[C])PHVVVGTPGR||	1|1||	7.79|6.9||	NA|NA||	7.35	0.63	2	2
P36776	682	LONP1	LONP1_682	LONM_HUMAN Lon protease homolog, mitochondrial OS=Homo sapiens OX=9606 GN=LONP1 PE=1 SV=2	|||ALC(BTD[C])GLDESK	|||1	|||7.35	|||NA	7.35	NA	1	1
Q9H2U2	44	PPA2	PPA2_44	IPYR2_HUMAN Inorganic pyrophosphatase 2, mitochondrial OS=Homo sapiens OX=9606 GN=PPA2 PE=1 SV=2	GQPC(BTD[C])SQNYR|||	1|||	7.38|||	NA|||	7.38	NA	1	1
Q14247	112	CTTN	CTTN_112	SRC8_HUMAN Src substrate cortactin OS=Homo sapiens OX=9606 GN=CTTN PE=1 SV=2	|||HC(BTD[C])SQVDSVR	|||1	|||7.4	|||NA	7.4	NA	1	1
Q96QR8	273	PURB	PURB_273	PURB_HUMAN Transcriptional activator protein Pur-beta OS=Homo sapiens OX=9606 GN=PURB PE=1 SV=3	FGGAFC(BTD[C])R|||	1|||	7.57|||	NA|||	7.57	NA	1	1
P49411	290	TUFM	TUFM_290	EFTU_HUMAN Elongation factor Tu, mitochondrial OS=Homo sapiens OX=9606 GN=TUFM PE=1 SV=2	GDEC(BTD[C])ELLGHSK|GDEC(BTD[C])ELLGHSK|KGDEC(BTD[C])ELLGHSK|KGDEC(BTD[C])ELLGHSK	1|1|2|1	10.0|8.25|5.9|6.32	NA|NA|1.14551|NA	7.62	1.89	5	4
A6NDG6	297	PGP	PGP_297	PGP_HUMAN Glycerol-3-phosphate phosphatase OS=Homo sapiens OX=9606 GN=PGP PE=1 SV=1	|NNQESDC(BTD[C])VSK||NNQESDC(BTD[C])VSK	|1||1	|5.46||9.82	|NA||NA	7.64	3.08	2	2
Q9Y230	227	RUVBL2	RUVBL2_227	RUVB2_HUMAN RuvB-like 2 OS=Homo sapiens OX=9606 GN=RUVBL2 PE=1 SV=3	||FVQC(BTD[C])PDGELQK|	||1|	||7.64|	||NA|	7.64	NA	1	1
Q14318	378	FKBP8	FKBP8_378	FKBP8_HUMAN Peptidyl-prolyl cis-trans isomerase FKBP8 OS=Homo sapiens OX=9606 GN=FKBP8 PE=1 SV=2	LPAKC(BTD[C])PGK|LPAKC(BTD[C])PGK||	1|1||	7.58|7.71||	NA|NA||	7.65	0.09	2	2
P25398	106	RPS12	RPS12_106	RS12_HUMAN 40S ribosomal protein S12 OS=Homo sapiens OX=9606 GN=RPS12 PE=1 SV=3	|KVVGC(BTD[C])SCVVVK||	|1||	|7.69||	|NA||	7.69	NA	1	1
P17987	357	TCP1	TCP1_357	TCPA_HUMAN T-complex protein 1 subunit alpha OS=Homo sapiens OX=9606 GN=TCP1 PE=1 SV=1	|IC(BTD[C])DDELILIK|IC(BTD[C])DDELILIK|IC(BTD[C])DDELILIK	|1|1|2	|6.97|7.6|8.63	|NA|NA|0.0	7.73	0.84	4	3
Q00839	607	HNRNPU	HNRNPU_607	HNRPU_HUMAN Heterogeneous nuclear ribonucleoprotein U OS=Homo sapiens OX=9606 GN=HNRNPU PE=1 SV=6	|KAVVVC(BTD[C])PK||	|1||	|7.85||	|NA||	7.85	NA	1	1
P46109	249	CRKL	CRKL_249	CRKL_HUMAN Crk-like protein OS=Homo sapiens OX=9606 GN=CRKL PE=1 SV=1	VPC(BTD[C])AYDK||VPC(BTD[C])AYDK|VPC(BTD[C])AYDK	1||1|1	7.57||11.89|4.39	NA||NA|NA	7.95	3.76	3	3
O14981	914	BTAF1	BTAF1_914	BTAF1_HUMAN TATA-binding protein-associated factor 172 OS=Homo sapiens OX=9606 GN=BTAF1 PE=1 SV=2	TPC(BTD[C])PNSK|||	1|||	7.97|||	NA|||	7.97	NA	1	1
P25398	108	RPS12	RPS12_108	RS12_HUMAN 40S ribosomal protein S12 OS=Homo sapiens OX=9606 GN=RPS12 PE=1 SV=3	KVVGCSC(BTD[C])VVVK|KVVGCSC(BTD[C])VVVK||	1|1||	7.19|8.91||	NA|NA||	8.05	1.22	2	2
Q96Q11	373	TRNT1	TRNT1_373	TRNT1_HUMAN CCA tRNA nucleotidyltransferase 1, mitochondrial OS=Homo sapiens OX=9606 GN=TRNT1 PE=1 SV=2	YQGEHC(BTD[C])LLK|||	2|||	8.07|||	0.19799|||	8.07	NA	2	1	Disulfide bond
Q06278	1315	AOX1	AOX1_1315	AOXA_HUMAN Aldehyde oxidase OS=Homo sapiens OX=9606 GN=AOX1 PE=1 SV=2	|||MAC(BTD[C])EDKFTK	|||1	|||8.13	|||NA	8.13	NA	1	1
P15170	327	GSPT1	GSPT1_327	ERF3A_HUMAN Eukaryotic peptide chain release factor GTP-binding subunit ERF3A OS=Homo sapiens OX=9606 GN=GSPT1 PE=1 SV=1	|LESGSIC(BTD[C])K|LESGSIC(BTD[C])K|	|1|2|	|4.73|11.58|	|NA|3.90323|	8.16	4.84	3	2
P37268	374	FDFT1	FDFT1_374	FDFT_HUMAN Squalene synthase OS=Homo sapiens OX=9606 GN=FDFT1 PE=1 SV=1	|TQNLPNC(BTD[C])QLISR||	|1||	|8.26||	|NA||	8.26	NA	1	1
O75369	1915	FLNB	FLNB_1915	FLNB_HUMAN Filamin-B OS=Homo sapiens OX=9606 GN=FLNB PE=1 SV=2	||RC(BTD[C])SQVK|RC(BTD[C])SQVK	||1|1	||8.27|8.28	||NA|NA	8.28	0.01	2	2
Q96HC4	213	PDLIM5	PDLIM5_213	PDLI5_HUMAN PDZ and LIM domain protein 5 OS=Homo sapiens OX=9606 GN=PDLIM5 PE=1 SV=5	||QPTVTSVC(BTD[C])SETSQELAEGQR|	||1|	||8.34|	||NA|	8.34	NA	1	1
Q8TEX9	708	IPO4	IPO4_708	IPO4_HUMAN Importin-4 OS=Homo sapiens OX=9606 GN=IPO4 PE=1 SV=2	|LLEC(BTD[C])PHLNVR|LLEC(BTD[C])PHLNVR|	|1|1|	|10.59|6.34|	|NA|NA|	8.47	3.01	2	2
P22102	93	GART	GART_93	PUR2_HUMAN Trifunctional purine biosynthetic protein adenosine-3 OS=Homo sapiens OX=9606 GN=GART PE=1 SV=1	||SAGVQC(BTD[C])FGPTAEAAQLESSK|	||1|	||8.5|	||NA|	8.5	NA	1	1
P13861	128	PRKAR2A	PRKAR2A_128	KAP2_HUMAN cAMP-dependent protein kinase type II-alpha regulatory subunit OS=Homo sapiens OX=9606 GN=PRKAR2A PE=1 SV=2	|TDEQRC(BTD[C])R|TDEQRC(BTD[C])R|	|1|1|	|4.97|12.13|	|NA|NA|	8.55	5.06	2	2
P35579	1379	MYH9	MYH9_1379	MYH9_HUMAN Myosin-9 OS=Homo sapiens OX=9606 GN=MYH9 PE=1 SV=4	||KMEDSVGC(BTD[C])LETAEEVKR|MEDSVGC(BTD[C])LETAEEVKR	||1|1	||2.49|14.63	||NA|NA	8.56	8.58	2	2
Q96EP5	85	DAZAP1	DAZAP1_85	DAZP1_HUMAN DAZ-associated protein 1 OS=Homo sapiens OX=9606 GN=DAZAP1 PE=1 SV=1	NIDPKPC(BTD[C])TPR||NIDPKPC(BTD[C])TPR|NIDPKPC(BTD[C])TPR	1||1|1	6.78||9.14|10.19	NA||NA|NA	8.7	1.75	3	3
P20645	32	M6PR	M6PR_32	MPRD_HUMAN Cation-dependent mannose-6-phosphate receptor OS=Homo sapiens OX=9606 GN=M6PR PE=1 SV=1	||TC(BTD[C])DLVGEK|	||1|	||8.72|	||NA|	8.72	NA	1	1	Disulfide bond
Q15365	54	PCBP1	PCBP1_54	PCBP1_HUMAN Poly(rC)-binding protein 1 OS=Homo sapiens OX=9606 GN=PCBP1 PE=1 SV=2	SEGNC(BTD[C])PER ISEGNC(BTD[C])PER INISEGNC(BTD[C])PER|ISEGNC(BTD[C])PER NISEGNC(BTD[C])PER INISEGNC(BTD[C])PER||	5|3||	13.68|3.84||	4.37381|4.84507||	8.76	6.96	8	2
P51858	108	HDGF	HDGF_108	HDGF_HUMAN Hepatoma-derived growth factor OS=Homo sapiens OX=9606 GN=HDGF PE=1 SV=1	|KSC(BTD[C])VEEPEPEPEAAEGDGDKK|KSC(BTD[C])VEEPEPEPEAAEGDGDKK|	|2|1|	|9.235|8.31|	|0.82731|NA|	8.77	0.65	3	2	Disulfide bond
P31947	38	SFN	SFN_38	1433S_HUMAN 14-3-3 protein sigma OS=Homo sapiens OX=9606 GN=SFN PE=1 SV=1	KGEELSC(BTD[C])EER GEELSC(BTD[C])EER|GEELSC(BTD[C])EER|GEELSC(BTD[C])EER|GEELSC(BTD[C])EER	4|1|1|1	4.35|4.31|15.93|11.03	1.5219|NA|NA|NA	8.91	5.65	7	4
Q99829	53	CPNE1	CPNE1_53	CPNE1_HUMAN Copine-1 OS=Homo sapiens OX=9606 GN=CPNE1 PE=1 SV=1	RNC(BTD[C])SSPEFSK VRNC(BTD[C])SSPEFSK|RNC(BTD[C])SSPEFSK NC(BTD[C])SSPEFSK|NC(BTD[C])SSPEFSK|NC(BTD[C])SSPEFSK	2|2|1|1	7.365|6.995|13.11|8.21	8.44993|0.33234|NA|NA	8.92	2.84	6	4
P57721	86	PCBP3	PCBP3_86	PCBP3_HUMAN Poly(rC)-binding protein 3 OS=Homo sapiens OX=9606 GN=PCBP3 PE=2 SV=2	||ISEGNC(BTD[C])PER INISEGNC(BTD[C])PER|	||3|	||9.01|	||0.99847|	9.01	NA	3	1
Q9NZZ3	20	CHMP5	CHMP5_20	CHMP5_HUMAN Charged multivesicular body protein 5 OS=Homo sapiens OX=9606 GN=CHMP5 PE=1 SV=1	APPPSLTDC(BTD[C])IGTVDSR|APPPSLTDC(BTD[C])IGTVDSR|APPPSLTDC(BTD[C])IGTVDSR|APPPSLTDC(BTD[C])IGTVDSR	2|1|1|1	5.065|5.5|13.45|12.81	0.71418|NA|NA|NA	9.21	4.54	5	4
P27797	105	CALR	CALR_105	CALR_HUMAN Calreticulin OS=Homo sapiens OX=9606 GN=CALR PE=1 SV=1	HEQNIDC(BTD[C])GGGYVK||HEQNIDC(BTD[C])GGGYVK|	1||1|	7.28||11.14|	NA||NA|	9.21	2.73	2	2	Disulfide bond
Q96EI5	34	TCEAL4	TCEAL4_34	TCAL4_HUMAN Transcription elongation factor A protein-like 4 OS=Homo sapiens OX=9606 GN=TCEAL4 PE=1 SV=2	KPEVTC(BTD[C])TLEDK|KPEVTC(BTD[C])TLEDK||KPEVTC(BTD[C])TLEDK	1|2||1	9.13|7.72||10.8	NA|0.60811||NA	9.22	1.54	4	3
P63151	398	PPP2R2A	PPP2R2A_398	2ABA_HUMAN Serine/threonine-protein phosphatase 2A 55 kDa regulatory subunit B alpha isoform OS=Homo sapiens OX=9606 GN=PPP2R2A PE=1 SV=1	||KVC(BTD[C])ASGK|KVC(BTD[C])ASGK	||1|1	||9.48|9.02	||NA|NA	9.25	0.33	2	2
Q9Y696	35	CLIC4	CLIC4_35	CLIC4_HUMAN Chloride intracellular channel protein 4 OS=Homo sapiens OX=9606 GN=CLIC4 PE=1 SV=4	|||IGNC(BTD[C])PFSQR	|||1	|||9.25	|||NA	9.25	NA	1	1
P17812	491	CTPS1	CTPS1_491	PYRG1_HUMAN CTP synthase 1 OS=Homo sapiens OX=9606 GN=CTPS1 PE=1 SV=2	KC(BTD[C])LEEQGLK|KC(BTD[C])LEEQGLK|KC(BTD[C])LEEQGLK|	1|1|1|	6.39|10.86|10.97|	NA|NA|NA|	9.41	2.61	3	3
P63208	160	SKP1	SKP1_160	SKP1_HUMAN S-phase kinase-associated protein 1 OS=Homo sapiens OX=9606 GN=SKP1 PE=1 SV=2	KENQWC(BTD[C])EEK|KENQWC(BTD[C])EEK|KENQWC(BTD[C])EEK|	1|1|1|	7.92|8.15|12.32|	NA|NA|NA|	9.46	2.48	3	3
P07814	1377	EPRS	EPRS_1377	SYEP_HUMAN Bifunctional glutamate/proline--tRNA ligase OS=Homo sapiens OX=9606 GN=EPRS PE=1 SV=5	|SC(BTD[C])QFVAVR|SC(BTD[C])QFVAVR|SC(BTD[C])QFVAVR	|2|1|1	|7.29|10.72|11.05	|0.0|NA|NA	9.69	2.08	4	3
P51858	12	HDGF	HDGF_12	HDGF_HUMAN Hepatoma-derived growth factor OS=Homo sapiens OX=9606 GN=HDGF PE=1 SV=1	YKC(BTD[C])GDLVFAK|YKC(BTD[C])GDLVFAK EYKC(BTD[C])GDLVFAK||EYKC(BTD[C])GDLVFAK	1|3||1	9.52|3.06||16.56	NA|1.66277||NA	9.71	6.75	5	3	Disulfide bond
P30041	91	PRDX6	PRDX6_91	PRDX6_HUMAN Peroxiredoxin-6 OS=Homo sapiens OX=9606 GN=PRDX6 PE=1 SV=3	||DINAYNC(BTD[C])EEPTEK|	||1|	||9.87|	||NA|	9.87	NA	1	1
P53396	20	ACLY	ACLY_20	ACLY_HUMAN ATP-citrate synthase OS=Homo sapiens OX=9606 GN=ACLY PE=1 SV=3	FIC(BTD[C])TTSAIQNR|||FIC(BTD[C])TTSAIQNR	1|||2	6.02|||13.825	NA|||4.74469	9.92	5.52	3	2
O14975	320	SLC27A2	SLC27A2_320	S27A2_HUMAN Very long-chain acyl-CoA synthetase OS=Homo sapiens OX=9606 GN=SLC27A2 PE=1 SV=2	|YLC(BTD[C])NSPQKPNDR||	|1||	|10.07||	|NA||	10.07	NA	1	1
Q16576	166	RBBP7	RBBP7_166	RBBP7_HUMAN Histone-binding protein RBBP7 OS=Homo sapiens OX=9606 GN=RBBP7 PE=1 SV=1	HPAKPDPSGEC(BTD[C])NPDLR|||	1|||	10.12|||	NA|||	10.12	NA	1	1
Q9ULV4	456	CORO1C	CORO1C_456	COR1C_HUMAN Coronin-1C OS=Homo sapiens OX=9606 GN=CORO1C PE=1 SV=1	SIKDTIC(BTD[C])NQDER||SIKDTIC(BTD[C])NQDER|DTIC(BTD[C])NQDER	2||1|1	4.94||11.65|13.79	0.18385||NA|NA	10.13	4.62	4	3
P27348	134	YWHAQ	YWHAQ_134	1433T_HUMAN 14-3-3 protein theta OS=Homo sapiens OX=9606 GN=YWHAQ PE=1 SV=1	YLAEVAC(BTD[C])GDDR|YLAEVAC(BTD[C])GDDRK YLAEVAC(BTD[C])GDDR|YLAEVAC(BTD[C])GDDR|YLAEVAC(BTD[C])GDDRK YLAEVAC(BTD[C])GDDR	1|2|2|2	3.66|6.5|14.22|16.49	NA|0.14142|2.84257|2.33345	10.22	6.12	7	4
O14684	59	PTGES	PTGES_59	PTGES_HUMAN Prostaglandin E synthase OS=Homo sapiens OX=9606 GN=PTGES PE=1 SV=2	HGGPQYC(BTD[C])R|||	2|||	10.26|||	7.00036|||	10.26	NA	2	1
P23528	147	CFL1	CFL1_147	COF1_HUMAN Cofilin-1 OS=Homo sapiens OX=9606 GN=CFL1 PE=1 SV=3	DRC(BTD[C])TLAEK|DRC(BTD[C])TLAEK|DRC(BTD[C])TLAEK|DRC(BTD[C])TLAEK	5|6|4|2	5.93|5.95|14.53|14.785	0.83173|0.49334|3.05905|0.09192	10.3	5.03	17	4
P23588	457	EIF4B	EIF4B_457	IF4B_HUMAN Eukaryotic translation initiation factor 4B OS=Homo sapiens OX=9606 GN=EIF4B PE=1 SV=2	SLENETLNKEEDC(BTD[C])HSPTSKPPKPDQPLK|||	1|||	10.41|||	NA|||	10.41	NA	1	1
Q92688	114	ANP32B	ANP32B_114	AN32B_HUMAN Acidic leucine-rich nuclear phosphoprotein 32 family member B OS=Homo sapiens OX=9606 GN=ANP32B PE=1 SV=1	|KLEC(BTD[C])IK|KLEC(BTD[C])IK|	|1|1|	|10.33|11.1|	|NA|NA|	10.72	0.54	2	2
P21333	2543	FLNA	FLNA_2543	FLNA_HUMAN Filamin-A OS=Homo sapiens OX=9606 GN=FLNA PE=1 SV=4	ATC(BTD[C])APQHGAPGPGPADASK|ATC(BTD[C])APQHGAPGPGPADASK|ATC(BTD[C])APQHGAPGPGPADASK|ATC(BTD[C])APQHGAPGPGPADASK	1|3|1|1	8.81|7.66|15.32|11.22	NA|0.00577|NA|NA	10.75	3.39	6	4
P30419	294	NMT1	NMT1_294	NMT1_HUMAN Glycylpeptide N-tetradecanoyltransferase 1 OS=Homo sapiens OX=9606 GN=NMT1 PE=1 SV=2	PVGTC(BTD[C])R|PVGTC(BTD[C])R||	1|1||	11.22|10.42||	NA|NA||	10.82	0.57	2	2
O15067	606	PFAS	PFAS_606	PUR4_HUMAN Phosphoribosylformylglycinamidine synthase OS=Homo sapiens OX=9606 GN=PFAS PE=1 SV=4	|IVLVDDREC(BTD[C])PVR||IVLVDDREC(BTD[C])PVR	|1||1	|3.29||18.37	|NA||NA	10.83	10.66	2	2
Q16629	73	SRSF7	SRSF7_73	SRSF7_HUMAN Serine/arginine-rich splicing factor 7 OS=Homo sapiens OX=9606 GN=SRSF7 PE=1 SV=1	||VIC(BTD[C])GSR|VIC(BTD[C])GSR	||1|1	||11.0|10.73	||NA|NA	10.87	0.19	2	2
Q6NW34	419	NEPRO	NEPRO_419	NEPRO_HUMAN Nucleolus and neural progenitor protein OS=Homo sapiens OX=9606 GN=NEPRO PE=1 SV=3	|||KLEC(BTD[C])IK KLEC(BTD[C])LK	|||3	|||11.21	|||3.11559	11.21	NA	3	1
O75369	1868	FLNB	FLNB_1868	FLNB_HUMAN Filamin-B OS=Homo sapiens OX=9606 GN=FLNB PE=1 SV=2	||AEISC(BTD[C])IDNK|	||2|	||11.23|	||0.0|	11.23	NA	2	1
P21333	1402	FLNA	FLNA_1402	FLNA_HUMAN Filamin-A OS=Homo sapiens OX=9606 GN=FLNA PE=1 SV=4	|||MSC(BTD[C])MDNK	|||3	|||11.58	|||1.78979	11.58	NA	3	1
Q9NS86	169	LANCL2	LANCL2_169	LANC2_HUMAN LanC-like protein 2 OS=Homo sapiens OX=9606 GN=LANCL2 PE=1 SV=1	|||SDC(BTD[C])ESQECVTK	|||1	|||11.91	|||NA	11.91	NA	1	1
P60903	62	S100A10	S100A10_62	S10AA_HUMAN Protein S100-A10 OS=Homo sapiens OX=9606 GN=S100A10 PE=1 SV=2	||DLDQC(BTD[C])R|DLDQC(BTD[C])R	||1|1	||12.64|12.04	||NA|NA	12.34	0.42	2	2
P55060	387	CSE1L	CSE1L_387	XPO2_HUMAN Exportin-2 OS=Homo sapiens OX=9606 GN=CSE1L PE=1 SV=3	||AAC(BTD[C])DLVR|	||2|	||13.08|	||0.0|	13.08	NA	2	1
Q5VTR2	344	RNF20	RNF20_344	BRE1A_HUMAN E3 ubiquitin-protein ligase BRE1A OS=Homo sapiens OX=9606 GN=RNF20 PE=1 SV=2	||LC(BTD[C])ELEK|	||1|	||13.74|	||NA|	13.74	NA	1	1
Q9UHD1	86	CHORDC1	CHORDC1_86	CHRD1_HUMAN Cysteine and histidine-rich domain-containing protein 1 OS=Homo sapiens OX=9606 GN=CHORDC1 PE=1 SV=2	KELC(BTD[C])ELKPK ELC(BTD[C])ELKPK||ELC(BTD[C])ELKPK|	2||1|	2.655||24.86|	3.0052||NA|	13.76	15.7	3	2
P35579	1437	MYH9	MYH9_1437	MYH9_HUMAN Myosin-9 OS=Homo sapiens OX=9606 GN=MYH9 PE=1 SV=4	||QSAC(BTD[C])NLEK|	||2|	||14.505|	||0.12021|	14.51	NA	2	1
Q9UHD8	248	SEPTIN9	SEPTIN9_248	SEPT9_HUMAN Septin-9 OS=Homo sapiens OX=9606 GN=SEPTIN9 PE=1 SV=2	||SQEATEAAPSC(BTD[C])VGDMADTPR|	||1|	||14.68|	||NA|	14.68	NA	1	1
Q93009	315	USP7	USP7_315	UBP7_HUMAN Ubiquitin carboxyl-terminal hydrolase 7 OS=Homo sapiens OX=9606 GN=USP7 PE=1 SV=2	||GTC(BTD[C])VEGTIPK|	||1|	||15.34|	||NA|	15.34	NA	1	1
P00492	106	HPRT1	HPRT1_106	HPRT_HUMAN Hypoxanthine-guanine phosphoribosyltransferase OS=Homo sapiens OX=9606 GN=HPRT1 PE=1 SV=2	||SYC(BTD[C])NDQSTGDIK|SYC(BTD[C])NDQSTGDIK	||2|3	||15.52|15.21	||8.17415|1.03655	15.37	0.22	5	2
O43747	539	AP1G1	AP1G1_539	AP1G1_HUMAN AP-1 complex subunit gamma-1 OS=Homo sapiens OX=9606 GN=AP1G1 PE=1 SV=5	||FTC(BTD[C])TVNR|FTC(BTD[C])TVNR	||1|1	||17.76|18.84	||NA|NA	18.3	0.76	2	2
P15927	219	RPA2	RPA2_219	RFA2_HUMAN Replication protein A 32 kDa subunit OS=Homo sapiens OX=9606 GN=RPA2 PE=1 SV=1	AC(BTD[C])PRPEGLNFQDLK|||	1|||	20.52|||	NA|||	20.52	NA	1	1
P20810	328	CAST	CAST_328	ICAL_HUMAN Calpastatin OS=Homo sapiens OX=9606 GN=CAST PE=1 SV=4	|||LEKC(BTD[C])GEDDETIPSEYR	|||1	|||22.46	|||NA	22.46	NA	1	1
