# Supplementary material for: Nucleophilic covalent ligand discovery for the cysteine redoxome
Source: Research Square preprint supplement (doi:10.21203/rs.3.rs-1765196/v1), 2022-06-23
Supplement: Supplementary file 5 [file e8680e423e5576a8d8efba28.xlsx]

## Sheet: Legend
Supplementary Data 2. Comparing nucleophilic fragments with electrophilic fragments showed distinct target profiles of electrophilc and nucleophilc fragments with the same scaffold.

## Sheet: 3a
Uniprot Accession #	Site	Genename	Genename_site	Description	Modified sequences	Spectrum count	All ratio	All SD Ratio	RH/L	Ratio SD	Total spectrum count	Repeat counts
Q5VTU8	19	ATP5F1EP2	Q5VTU8_19	AT5EL_HUMAN ATP synthase subunit epsilon-like protein, mitochondrial OS=Homo sapiens OX=9606 GN=ATP5F1EP2 PE=1 SV=1	YSQIC(BTD[C])AK|	1|	3.02|	NA|	3.02	NA	1	1
Q56VL3	27	OCIAD2	Q56VL3_27	OCAD2_HUMAN OCIA domain-containing protein 2 OS=Homo sapiens OX=9606 GN=OCIAD2 PE=1 SV=1	QSLLFC(BTD[C])PK|QSLLFC(BTD[C])PK	2|1	1.995|1.76	0.03536|NA	1.8775	0.16617	3	2
P10316	363	HLA-A	P10316_363	1A69_HUMAN HLA class I histocompatibility antigen, A-69 alpha chain OS=Homo sapiens OX=9606 GN=HLA-A PE=1 SV=2	KGGSYSQAASSDSAQGSDVSLTAC(BTD[C])K|	1|	1.83|	NA|	1.83	NA	1	1
Q8NB16	18	MLKL	Q8NB16_18	MLKL_HUMAN Mixed lineage kinase domain-like protein OS=Homo sapiens OX=9606 GN=MLKL PE=1 SV=1	|RC(BTD[C])EEMK	|1	|1.76	|NA	1.76	NA	1	1
Q9NQW6	1037	ANLN	Q9NQW6_1037	ANLN_HUMAN Anillin OS=Homo sapiens OX=9606 GN=ANLN PE=1 SV=2	INLANC(BTD[C])TSR|INLANC(BTD[C])TSR	1|1	1.39|2.11	NA|NA	1.75	0.50912	2	2
P33993	566	MCM7	P33993_566	MCM7_HUMAN DNA replication licensing factor MCM7 OS=Homo sapiens OX=9606 GN=MCM7 PE=1 SV=4	|YIAMC(BTD[C])R	|1	|1.64	|NA	1.64	NA	1	1
Q2TAY7	298	SMU1	Q2TAY7_298	SMU1_HUMAN WD40 repeat-containing protein SMU1 OS=Homo sapiens OX=9606 GN=SMU1 PE=1 SV=2	|IQSGQC(BTD[C])LR	|1	|1.55	|NA	1.55	NA	1	1
P55060	61	CSE1L	P55060_61	XPO2_HUMAN Exportin-2 OS=Homo sapiens OX=9606 GN=CSE1L PE=1 SV=3	|VC(BTD[C])ASVTFK	|1	|1.54	|NA	1.54	NA	1	1
P25398	108	RPS12	P25398_108	RS12_HUMAN 40S ribosomal protein S12 OS=Homo sapiens OX=9606 GN=RPS12 PE=1 SV=3	KVVGCSC(BTD[C])VVVK|KVVGCSC(BTD[C])VVVK VVGCSC(BTD[C])VVVK	1|2	1.49|1.56	NA|0.49497	1.525	0.0495	3	2
P55769	102	SNU13	P55769_102	NH2L1_HUMAN NHP2-like protein 1 OS=Homo sapiens OX=9606 GN=SNU13 PE=1 SV=3	|PVIAC(BTD[C])SVTIK	|3	|1.49	|0.55426	1.49	NA	3	1
Q8ND24	139	RNF214	Q8ND24_139	RN214_HUMAN RING finger protein 214 OS=Homo sapiens OX=9606 GN=RNF214 PE=1 SV=2	|AGC(BTD[C])HTK	|1	|1.47	|NA	1.47	NA	1	1
P46939	1970	UTRN	P46939_1970	UTRO_HUMAN Utrophin OS=Homo sapiens OX=9606 GN=UTRN PE=1 SV=2	KGC(BTD[C])FDR|	1|	1.46|	NA|	1.46	NA	1	1
Q15041	109	ARL6IP1	Q15041_109	AR6P1_HUMAN ADP-ribosylation factor-like protein 6-interacting protein 1 OS=Homo sapiens OX=9606 GN=ARL6IP1 PE=1 SV=2	FHEIC(BTD[C])SNLVK|FHEIC(BTD[C])SNLVK	1|1	1.55|1.31	NA|NA	1.43	0.16971	2	2
P17987	357	TCP1	P17987_357	TCPA_HUMAN T-complex protein 1 subunit alpha OS=Homo sapiens OX=9606 GN=TCP1 PE=1 SV=1	IC(BTD[C])DDELILIK|	2|	1.415|	0.02121|	1.415	NA	2	1
Q9NRF8	299	CTPS2	Q9NRF8_299	PYRG2_HUMAN CTP synthase 2 OS=Homo sapiens OX=9606 GN=CTPS2 PE=1 SV=1	|IC(BTD[C])SIALVGK	|1	|1.37	|NA	1.37	NA	1	1
P67936	154	TPM4	P67936_154	TPM4_HUMAN Tropomyosin alpha-4 chain OS=Homo sapiens OX=9606 GN=TPM4 PE=1 SV=3	AEVSELKC(BTD[C])GDLEEELK|	3|	1.36|	0.29445|	1.36	NA	3	1
P02766	30	TTR	P02766_30	TTHY_HUMAN Transthyretin OS=Homo sapiens OX=9606 GN=TTR PE=1 SV=1	|C(BTD[C])PLMVK	|1	|1.3	|NA	1.3	NA	1	1
Q14204	792	DYNC1H1	Q14204_792	DYHC1_HUMAN Cytoplasmic dynein 1 heavy chain 1 OS=Homo sapiens OX=9606 GN=DYNC1H1 PE=1 SV=5	|TC(BTD[C])EKVEER	|2	|1.29	|0.96167	1.29	NA	2	1
P84103	74	SRSF3	P84103_74	SRSF3_HUMAN Serine/arginine-rich splicing factor 3 OS=Homo sapiens OX=9606 GN=SRSF3 PE=1 SV=1	TLCGC(BTD[C])R|	1|	1.28|	NA|	1.28	NA	1	1
Q9Y2S2	182	CRYL1	Q9Y2S2_182	CRYL1_HUMAN Lambda-crystallin homolog OS=Homo sapiens OX=9606 GN=CRYL1 PE=1 SV=3	IGQC(BTD[C])PMR|	1|	1.25|	NA|	1.25	NA	1	1
O60701	112	UGDH	O60701_112	UGDH_HUMAN UDP-glucose 6-dehydrogenase OS=Homo sapiens OX=9606 GN=UGDH PE=1 SV=1	YIEAC(BTD[C])AR|	1|	1.23|	NA|	1.23	NA	1	1
Q99460	898	PSMD1	Q99460_898	PSMD1_HUMAN 26S proteasome non-ATPase regulatory subunit 1 OS=Homo sapiens OX=9606 GN=PSMD1 PE=1 SV=2	VLTMPETC(BTD[C])R|VLTMPETC(BTD[C])R	3|3	0.88|1.56	0.60008|0.57236	1.22	0.48083	6	2
P49419	522	ALDH7A1	P49419_522	AL7A1_HUMAN Alpha-aminoadipic semialdehyde dehydrogenase OS=Homo sapiens OX=9606 GN=ALDH7A1 PE=1 SV=5	|STC(BTD[C])TINYSK	|1	|1.19	|NA	1.19	NA	1	1
Q02543	64	RPL18A	Q02543_64	RL18A_HUMAN 60S ribosomal protein L18a OS=Homo sapiens OX=9606 GN=RPL18A PE=1 SV=2	SSGEIVYC(BTD[C])GQVFEK|	1|	1.19|	NA|	1.19	NA	1	1
P14735	904	IDE	P14735_904	IDE_HUMAN Insulin-degrading enzyme OS=Homo sapiens OX=9606 GN=IDE PE=1 SV=4	KLSAEC(BTD[C])AK|	1|	1.18|	NA|	1.18	NA	1	1
P55072	522	VCP	P55072_522	TERA_HUMAN Transitional endoplasmic reticulum ATPase OS=Homo sapiens OX=9606 GN=VCP PE=1 SV=4	GVLFYGPPGC(BTD[C])GK|	1|	1.18|	NA|	1.18	NA	1	1
P00558	99	PGK1	P00558_99	PGK1_HUMAN Phosphoglycerate kinase 1 OS=Homo sapiens OX=9606 GN=PGK1 PE=1 SV=3	DC(BTD[C])VGPEVEK|DC(BTD[C])VGPEVEK	1|1	1.3|1.05	NA|NA	1.175	0.17678	2	2
P29144	150	TPP2	P29144_150	TPP2_HUMAN Tripeptidyl-peptidase 2 OS=Homo sapiens OX=9606 GN=TPP2 PE=1 SV=4	|VALAEAC(BTD[C])R	|1	|1.17	|NA	1.17	NA	1	1
Q7Z478	1059	DHX29	Q7Z478_1059	DHX29_HUMAN ATP-dependent RNA helicase DHX29 OS=Homo sapiens OX=9606 GN=DHX29 PE=1 SV=2	KIGAC(BTD[C])ELNEPK|	1|	1.17|	NA|	1.17	NA	1	1
O00410	266	IPO5	O00410_266	IPO5_HUMAN Importin-5 OS=Homo sapiens OX=9606 GN=IPO5 PE=1 SV=4	LC(BTD[C])GDTSLNNMQR|LC(BTD[C])GDTSLNNMQR	2|1	1.37|0.95	0.0|NA	1.16	0.29698	3	2
Q99714	5	HSD17B10	Q99714_5	HCD2_HUMAN 3-hydroxyacyl-CoA dehydrogenase type-2 OS=Homo sapiens OX=9606 GN=HSD17B10 PE=1 SV=3	|MAAAC(BTD[C])R	|1	|1.16	|NA	1.16	NA	1	1
P06733	337	ENO1	P06733_337	ENOA_HUMAN Alpha-enolase OS=Homo sapiens OX=9606 GN=ENO1 PE=1 SV=2	SC(BTD[C])NCLLLK|SC(BTD[C])NCLLLK	3|1	1.13|1.17	0.06928|NA	1.15	0.02828	4	2
Q6P1X5	767	TAF2	Q6P1X5_767	TAF2_HUMAN Transcription initiation factor TFIID subunit 2 OS=Homo sapiens OX=9606 GN=TAF2 PE=1 SV=3	|DVHNLC(BTD[C])PK	|1	|1.15	|NA	1.15	NA	1	1
Q96GQ7	392	DDX27	Q96GQ7_392	DDX27_HUMAN Probable ATP-dependent RNA helicase DDX27 OS=Homo sapiens OX=9606 GN=DDX27 PE=1 SV=2	MC(BTD[C])SHHR|	1|	1.15|	NA|	1.15	NA	1	1
Q9ULJ6	705	ZMIZ1	Q9ULJ6_705	ZMIZ1_HUMAN Zinc finger MIZ domain-containing protein 1 OS=Homo sapiens OX=9606 GN=ZMIZ1 PE=1 SV=3	|LLPAEHC(BTD[C])ITK	|1	|1.15	|NA	1.15	NA	1	1
Q96CV9	555	OPTN	Q96CV9_555	OPTN_HUMAN Optineurin OS=Homo sapiens OX=9606 GN=OPTN PE=1 SV=3	NIPIHSC(BTD[C])PK|	1|	1.14|	NA|	1.14	NA	1	1
Q9Y4W6	626	AFG3L2	Q9Y4W6_626	AFG32_HUMAN AFG3-like protein 2 OS=Homo sapiens OX=9606 GN=AFG3L2 PE=1 SV=2	|MC(BTD[C])MTLGGR	|1	|1.13	|NA	1.13	NA	1	1
P21127	432	CDK11B	P21127_432	CD11B_HUMAN Cyclin-dependent kinase 11B OS=Homo sapiens OX=9606 GN=CDK11B PE=1 SV=4	YLPALQGC(BTD[C])R|	1|	1.12|	NA|	1.12	NA	1	1
Q9HDC9	140	APMAP	Q9HDC9_140	APMAP_HUMAN Adipocyte plasma membrane-associated protein OS=Homo sapiens OX=9606 GN=APMAP PE=1 SV=2	FGSGPC(BTD[C])K|	1|	1.12|	NA|	1.12	NA	1	1
P53396	845	ACLY	P53396_845	ACLY_HUMAN ATP-citrate synthase OS=Homo sapiens OX=9606 GN=ACLY PE=1 SV=3	KPASFMTSIC(BTD[C])DER|KPASFMTSIC(BTD[C])DER	1|2	1.07|1.15	NA|0.0	1.11	0.05657	3	2
P05023	518	ATP1A1	P05023_518	AT1A1_HUMAN Sodium/potassium-transporting ATPase subunit alpha-1 OS=Homo sapiens OX=9606 GN=ATP1A1 PE=1 SV=1	C(BTD[C])SSILLHGK|	2|	1.1|	0.0|	1.1	NA	2	1
P12814	180	ACTN1	P12814_180	ACTN1_HUMAN Alpha-actinin-1 OS=Homo sapiens OX=9606 GN=ACTN1 PE=1 SV=2	|DGLGFC(BTD[C])ALIHR	|1	|1.1	|NA	1.1	NA	1	1
Q8N1G2	403	CMTR1	Q8N1G2_403	CMTR1_HUMAN Cap-specific mRNA (nucleoside-2'-O-)-methyltransferase 1 OS=Homo sapiens OX=9606 GN=CMTR1 PE=1 SV=1	TGGHFIC(BTD[C])K|	1|	1.1|	NA|	1.1	NA	1	1
P41250	471	GARS	P41250_471	GARS_HUMAN Glycine--tRNA ligase OS=Homo sapiens OX=9606 GN=GARS PE=1 SV=3	SCYDLSC(BTD[C])HAR|	1|	1.09|	NA|	1.09	NA	1	1
Q9Y2Z0	88	SUGT1	Q9Y2Z0_88	SGT1_HUMAN Protein SGT1 homolog OS=Homo sapiens OX=9606 GN=SUGT1 PE=1 SV=3	GIC(BTD[C])EYHEK|	1|	1.09|	NA|	1.09	NA	1	1
P21108	165	PRPS1L1	P21108_165	PRPS3_HUMAN Ribose-phosphate pyrophosphokinase 3 OS=Homo sapiens OX=9606 GN=PRPS1L1 PE=1 SV=2	NC(BTD[C])IIVSPDAGGAK|	1|	1.07|	NA|	1.07	NA	1	1
P20618	71	PSMB1	P20618_71	PSB1_HUMAN Proteasome subunit beta type-1 OS=Homo sapiens OX=9606 GN=PSMB1 PE=1 SV=2	|DSPKC(BTD[C])YK	|1	|1.05	|NA	1.05	NA	1	1
P22626	50	HNRNPA2B1	P22626_50	ROA2_HUMAN Heterogeneous nuclear ribonucleoproteins A2/B1 OS=Homo sapiens OX=9606 GN=HNRNPA2B1 PE=1 SV=2	LTDC(BTD[C])VVMRDPASK|LTDC(BTD[C])VVMRDPASK	1|1	1.07|1.03	NA|NA	1.05	0.02828	2	2
P62333	170	PSMC6	P62333_170	PRS10_HUMAN 26S proteasome regulatory subunit 10B OS=Homo sapiens OX=9606 GN=PSMC6 PE=1 SV=1	GC(BTD[C])LLYGPPGTGK|	4|	1.05|	0.51225|	1.05	NA	4	1
Q13045	1224	FLII	Q13045_1224	FLII_HUMAN Protein flightless-1 homolog OS=Homo sapiens OX=9606 GN=FLII PE=1 SV=2	|AC(BTD[C])QVYIQHMR	|1	|1.05	|NA	1.05	NA	1	1
Q14315	712	FLNC	Q14315_712	FLNC_HUMAN Filamin-C OS=Homo sapiens OX=9606 GN=FLNC PE=1 SV=3	|LYAQDADGC(BTD[C])PIDIK	|1	|1.05	|NA	1.05	NA	1	1
Q9NPQ8	258	RIC8A	Q9NPQ8_258	RIC8A_HUMAN Synembryn-A OS=Homo sapiens OX=9606 GN=RIC8A PE=1 SV=3	HC(BTD[C])VMIATAGDR|HC(BTD[C])VMIATAGDR	2|1	1.0|1.09	0.0|NA	1.045	0.06364	3	2
P49023	108	PXN	P49023_108	PAXI_HUMAN Paxillin OS=Homo sapiens OX=9606 GN=PXN PE=1 SV=3	|TSSVSNPQDSVGSPC(BTD[C])SR	|1	|1.04	|NA	1.04	NA	1	1
O00410	733	IPO5	O00410_733	IPO5_HUMAN Importin-5 OS=Homo sapiens OX=9606 GN=IPO5 PE=1 SV=4	VAAAESMPLLLEC(BTD[C])AR|	2|	1.035|	0.16263|	1.035	NA	2	1
P08238	564	HSP90AB1	P08238_564	HS90B_HUMAN Heat shock protein HSP 90-beta OS=Homo sapiens OX=9606 GN=HSP90AB1 PE=1 SV=4	AKFENLC(BTD[C])K|	1|	1.03|	NA|	1.03	NA	1	1
P20618	224	PSMB1	P20618_224	PSB1_HUMAN Proteasome subunit beta type-1 OS=Homo sapiens OX=9606 GN=PSMB1 PE=1 SV=2	|IC(BTD[C])IVTK	|1	|1.03	|NA	1.03	NA	1	1
P31040	467	SDHA	P31040_467	SDHA_HUMAN Succinate dehydrogenase [ubiquinone] flavoprotein subunit, mitochondrial OS=Homo sapiens OX=9606 GN=SDHA PE=1 SV=2	AC(BTD[C])ALSIEESCRPGDK|	1|	1.03|	NA|	1.03	NA	1	1
P62826	112	RAN	P62826_112	RAN_HUMAN GTP-binding nuclear protein Ran OS=Homo sapiens OX=9606 GN=RAN PE=1 SV=3	VC(BTD[C])ENIPIVLCGNK|VC(BTD[C])ENIPIVLCGNK	4|1	1.09|0.97	0.00816|NA	1.03	0.08485	5	2
Q9HDC9	409	APMAP	Q9HDC9_409	APMAP_HUMAN Adipocyte plasma membrane-associated protein OS=Homo sapiens OX=9606 GN=APMAP PE=1 SV=2	|SPFLC(BTD[C])R	|1	|1.03	|NA	1.03	NA	1	1
P14618	424	PKM	P14618_424	KPYM_HUMAN Pyruvate kinase PKM OS=Homo sapiens OX=9606 GN=PKM PE=1 SV=4	CC(BTD[C])SGAIIVLTK|CC(BTD[C])SGAIIVLTK	1|2	1.01|1.045	NA|0.09192	1.0275	0.02475	3	2
O75369	706	FLNB	O75369_706	FLNB_HUMAN Filamin-B OS=Homo sapiens OX=9606 GN=FLNB PE=1 SV=2	MDGTYAC(BTD[C])SYTPVK|	1|	1.02|	NA|	1.02	NA	1	1
P21589	476	NT5E	P21589_476	5NTD_HUMAN 5'-nucleotidase OS=Homo sapiens OX=9606 GN=NT5E PE=1 SV=1	LDVLC(BTD[C])TK|	1|	1.02|	NA|	1.02	NA	1	1
P21980	230	TGM2	P21980_230	TGM2_HUMAN Protein-glutamine gamma-glutamyltransferase 2 OS=Homo sapiens OX=9606 GN=TGM2 PE=1 SV=2	|VVSGMVNC(BTD[C])NDDQGVLLGR	|2	|1.02	|0.62225	1.02	NA	2	1
P62140	21	PPP1CB	P62140_21	PP1B_HUMAN Serine/threonine-protein phosphatase PP1-beta catalytic subunit OS=Homo sapiens OX=9606 GN=PPP1CB PE=1 SV=3	GC(BTD[C])RPGK|GC(BTD[C])RPGK	1|1	1.14|0.9	NA|NA	1.02	0.16971	2	2
Q9Y263	788	PLAA	Q9Y263_788	PLAP_HUMAN Phospholipase A-2-activating protein OS=Homo sapiens OX=9606 GN=PLAA PE=1 SV=2	|VSECC(BTD[C])R	|1	|1.02	|NA	1.02	NA	1	1
O00429	446	DNM1L	O00429_446	DNM1L_HUMAN Dynamin-1-like protein OS=Homo sapiens OX=9606 GN=DNM1L PE=1 SV=2	IIQHC(BTD[C])SNYSTQELLR|	2|	1.015|	0.06364|	1.015	NA	2	1
Q9NZZ3	20	CHMP5	Q9NZZ3_20	CHMP5_HUMAN Charged multivesicular body protein 5 OS=Homo sapiens OX=9606 GN=CHMP5 PE=1 SV=1	APPPSLTDC(BTD[C])IGTVDSR|APPPSLTDC(BTD[C])IGTVDSR	1|1	1.04|0.99	NA|NA	1.015	0.03536	2	2
P17987	147	TCP1	P17987_147	TCPA_HUMAN T-complex protein 1 subunit alpha OS=Homo sapiens OX=9606 GN=TCP1 PE=1 SV=1	DC(BTD[C])LINAAK|	2|	1.01|	0.18385|	1.01	NA	2	1
P35580	1238	MYH10	P35580_1238	MYH10_HUMAN Myosin-10 OS=Homo sapiens OX=9606 GN=MYH10 PE=1 SV=3	QGLETDNKELAC(BTD[C])EVK|QGLETDNKELAC(BTD[C])EVK	1|1	0.93|1.09	NA|NA	1.01	0.11314	2	2
P49720	19	PSMB3	P49720_19	PSB3_HUMAN Proteasome subunit beta type-3 OS=Homo sapiens OX=9606 GN=PSMB3 PE=1 SV=2	|NC(BTD[C])VAIAADRR	|2	|1.01	|0.0	1.01	NA	2	1
P78371	535	CCT2	P78371_535	TCPB_HUMAN T-complex protein 1 subunit beta OS=Homo sapiens OX=9606 GN=CCT2 PE=1 SV=4	VPDHHPC(BTD[C])|VPDHHPC(BTD[C])	4|4	1.0|1.015	0.01155|0.03202	1.0075	0.01061	8	2
P04040	232	CAT	P04040_232	CATA_HUMAN Catalase OS=Homo sapiens OX=9606 GN=CAT PE=1 SV=3	LVNANGEAVYC(BTD[C])K|LVNANGEAVYC(BTD[C])K	1|3	0.8|1.21	NA|0.15588	1.005	0.28991	4	2
P48509	184	CD151	P48509_184	CD151_HUMAN CD151 antigen OS=Homo sapiens OX=9606 GN=CD151 PE=1 SV=3	|VVPDSC(BTD[C])CK	|1	|1.0	|NA	1	NA	1	1
Q00610	436	CLTC	Q00610_436	CLH1_HUMAN Clathrin heavy chain 1 OS=Homo sapiens OX=9606 GN=CLTC PE=1 SV=5	YESLELC(BTD[C])R|	1|	1.0|	NA|	1	NA	1	1
Q9NXH9	482	TRMT1	Q9NXH9_482	TRM1_HUMAN tRNA (guanine(26)-N(2))-dimethyltransferase OS=Homo sapiens OX=9606 GN=TRMT1 PE=1 SV=1	VSLSHAC(BTD[C])K|	1|	1.0|	NA|	1	NA	1	1
P62070	55	RRAS2	P62070_55	RRAS2_HUMAN Ras-related protein R-Ras2 OS=Homo sapiens OX=9606 GN=RRAS2 PE=1 SV=1	|QC(BTD[C])VIDDR	|1	|0.99	|NA	0.99	NA	1	1
P84103	10	SRSF3	P84103_10	SRSF3_HUMAN Serine/arginine-rich splicing factor 3 OS=Homo sapiens OX=9606 GN=SRSF3 PE=1 SV=1	|DSCPLDC(BTD[C])K	|1	|0.99	|NA	0.99	NA	1	1
Q08J23	184	NSUN2	Q08J23_184	NSUN2_HUMAN tRNA (cytosine(34)-C(5))-methyltransferase OS=Homo sapiens OX=9606 GN=NSUN2 PE=1 SV=2	|ILDMC(BTD[C])AAPGSK	|1	|0.99	|NA	0.99	NA	1	1
Q15363	93	TMED2	Q15363_93	TMED2_HUMAN Transmembrane emp24 domain-containing protein 2 OS=Homo sapiens OX=9606 GN=TMED2 PE=1 SV=1	|FC(BTD[C])FSNR	|1	|0.99	|NA	0.99	NA	1	1
Q2TAY7	219	SMU1	Q2TAY7_219	SMU1_HUMAN WD40 repeat-containing protein SMU1 OS=Homo sapiens OX=9606 GN=SMU1 PE=1 SV=2	|SHVEC(BTD[C])AR	|1	|0.99	|NA	0.99	NA	1	1
Q8WUM4	231	PDCD6IP	Q8WUM4_231	PDC6I_HUMAN Programmed cell death 6-interacting protein OS=Homo sapiens OX=9606 GN=PDCD6IP PE=1 SV=1	|QC(BTD[C])QYKDTLPK	|1	|0.99	|NA	0.99	NA	1	1
Q9BXP5	441	SRRT	Q9BXP5_441	SRRT_HUMAN Serrate RNA effector molecule homolog OS=Homo sapiens OX=9606 GN=SRRT PE=1 SV=1	AEIISLC(BTD[C])K|	1|	0.99|	NA|	0.99	NA	1	1
Q9UKM9	51	RALY	Q9UKM9_51	RALY_HUMAN RNA-binding protein Raly OS=Homo sapiens OX=9606 GN=RALY PE=1 SV=1	|VAGC(BTD[C])SVHK	|2	|0.99	|0.41012	0.99	NA	2	1
P62316	63	SNRPD2	P62316_63	SMD2_HUMAN Small nuclear ribonucleoprotein Sm D2 OS=Homo sapiens OX=9606 GN=SNRPD2 PE=1 SV=1	HC(BTD[C])NMVLENVK|HC(BTD[C])NMVLENVK	1|2	0.97|1.0	NA|0.0	0.985	0.02121	3	2
P13796	140	LCP1	P13796_140	PLSL_HUMAN Plastin-2 OS=Homo sapiens OX=9606 GN=LCP1 PE=1 SV=6	ALENDPDC(BTD[C])R|ALENDPDC(BTD[C])R	1|2	1.18|0.78	NA|0.0	0.98	0.28284	3	2
P34932	167	HSPA4	P34932_167	HSP74_HUMAN Heat shock 70 kDa protein 4 OS=Homo sapiens OX=9606 GN=HSPA4 PE=1 SV=4	|SVMDATQIAGLNC(BTD[C])LR	|2	|0.98	|0.0	0.98	NA	2	1
P61978	185	HNRNPK	P61978_185	HNRPK_HUMAN Heterogeneous nuclear ribonucleoprotein K OS=Homo sapiens OX=9606 GN=HNRNPK PE=1 SV=1	LFQECC(BTD[C])PHSTDR|LFQECC(BTD[C])PHSTDR	2|2	0.995|0.965	0.03536|0.00707	0.98	0.02121	4	2
P55209	88	NAP1L1	P55209_88	NP1L1_HUMAN Nucleosome assembly protein 1-like 1 OS=Homo sapiens OX=9606 GN=NAP1L1 PE=1 SV=1	|C(BTD[C])AQIEAK	|2	|0.97	|0.0	0.97	NA	2	1
Q01469	47	FABP5	Q01469_47	FABP5_HUMAN Fatty acid-binding protein 5 OS=Homo sapiens OX=9606 GN=FABP5 PE=1 SV=3	AKPDCIITC(BTD[C])DGK|AKPDCIITC(BTD[C])DGK	1|1	0.83|1.11	NA|NA	0.97	0.19799	2	2
O75891	662	ALDH1L1	O75891_662	AL1L1_HUMAN Cytosolic 10-formyltetrahydrofolate dehydrogenase OS=Homo sapiens OX=9606 GN=ALDH1L1 PE=1 SV=2	SC(BTD[C])AISNVK|	3|	0.96|	0.00577|	0.96	NA	3	1
P08754	325	GNAI3	P08754_325	GNAI3_HUMAN Guanine nucleotide-binding protein G(i) subunit alpha OS=Homo sapiens OX=9606 GN=GNAI3 PE=1 SV=3	|EIYTHFTC(BTD[C])ATDTK	|1	|0.96	|NA	0.96	NA	1	1
P13639	591	EEF2	P13639_591	EF2_HUMAN Elongation factor 2 OS=Homo sapiens OX=9606 GN=EEF2 PE=1 SV=4	ETVSEESNVLC(BTD[C])LSK|ETVSEESNVLC(BTD[C])LSK	4|2	0.755|1.165	0.07506|0.00707	0.96	0.28991	6	2
Q86U44	483	METTL3	Q86U44_483	MTA70_HUMAN N6-adenosine-methyltransferase catalytic subunit OS=Homo sapiens OX=9606 GN=METTL3 PE=1 SV=2	EHC(BTD[C])LVGVK|	1|	0.96|	NA|	0.96	NA	1	1
Q86VP6	802	CAND1	Q86VP6_802	CAND1_HUMAN Cullin-associated NEDD8-dissociated protein 1 OS=Homo sapiens OX=9606 GN=CAND1 PE=1 SV=2	|C(BTD[C])VAALTR	|1	|0.96	|NA	0.96	NA	1	1
Q99442	55	SEC62	Q99442_55	SEC62_HUMAN Translocation protein SEC62 OS=Homo sapiens OX=9606 GN=SEC62 PE=1 SV=1	|AVDC(BTD[C])LLDSK	|1	|0.96	|NA	0.96	NA	1	1
Q9BQL6	125	FERMT1	Q9BQL6_125	FERM1_HUMAN Fermitin family homolog 1 OS=Homo sapiens OX=9606 GN=FERMT1 PE=1 SV=1	AVSDIC(BTD[C])K|	2|	0.96|	0.0|	0.96	NA	2	1
Q9Y4P3	148	TBL2	Q9Y4P3_148	TBL2_HUMAN Transducin beta-like protein 2 OS=Homo sapiens OX=9606 GN=TBL2 PE=1 SV=1	FSPDC(BTD[C])R|	1|	0.96|	NA|	0.96	NA	1	1
Q9Y639	259	NPTN	Q9Y639_259	NPTN_HUMAN Neuroplastin OS=Homo sapiens OX=9606 GN=NPTN PE=1 SV=2	|SENKNEGQDATMYC(BTD[C])K	|1	|0.96	|NA	0.96	NA	1	1
Q9Y678	169	COPG1	Q9Y678_169	COPG1_HUMAN Coatomer subunit gamma-1 OS=Homo sapiens OX=9606 GN=COPG1 PE=1 SV=1	C(BTD[C])SFDVVK|	1|	0.96|	NA|	0.96	NA	1	1
Q9NTK5	187	OLA1	Q9NTK5_187	OLA1_HUMAN Obg-like ATPase 1 OS=Homo sapiens OX=9606 GN=OLA1 PE=1 SV=2	LKPEYDIMC(BTD[C])K|LKPEYDIMC(BTD[C])K	2|2	0.705|1.21	0.28991|0.8061	0.9575	0.35709	4	2
O00264	129	PGRMC1	O00264_129	PGRC1_HUMAN Membrane-associated progesterone receptor component 1 OS=Homo sapiens OX=9606 GN=PGRMC1 PE=1 SV=3	|GLATFC(BTD[C])LDK	|2	|0.95	|0.0	0.95	NA	2	1
P35579	931	MYH9	P35579_931	MYH9_HUMAN Myosin-9 OS=Homo sapiens OX=9606 GN=MYH9 PE=1 SV=4	VEEEEERC(BTD[C])QHLQAEK C(BTD[C])QHLQAEK|C(BTD[C])QHLQAEK	2|4	0.78|1.12	0.6364|0.065	0.95	0.24042	6	2
P43490	397	NAMPT	P43490_397	NAMPT_HUMAN Nicotinamide phosphoribosyltransferase OS=Homo sapiens OX=9606 GN=NAMPT PE=1 SV=1	DLLNC(BTD[C])SFK|DLLNC(BTD[C])SFK	3|2	0.87|1.03	0.05196|0.0	0.95	0.11314	5	2
Q05086	83	UBE3A	Q05086_83	UBE3A_HUMAN Ubiquitin-protein ligase E3A OS=Homo sapiens OX=9606 GN=UBE3A PE=1 SV=4	|LC(BTD[C])DPHPSK	|1	|0.95	|NA	0.95	NA	1	1
Q9BYT8	153	NLN	Q9BYT8_153	NEUL_HUMAN Neurolysin, mitochondrial OS=Homo sapiens OX=9606 GN=NLN PE=1 SV=1	IVHLQETC(BTD[C])DLGK|	2|	0.95|	0.0|	0.95	NA	2	1
P31153	56	MAT2A	P31153_56	METK2_HUMAN S-adenosylmethionine synthase isoform type-2 OS=Homo sapiens OX=9606 GN=MAT2A PE=1 SV=1	VAC(BTD[C])ETVAK|	2|	0.945|	0.74246|	0.945	NA	2	1
P13693	28	TPT1	P13693_28	TCTP_HUMAN Translationally-controlled tumor protein OS=Homo sapiens OX=9606 GN=TPT1 PE=1 SV=1	EIADGLC(BTD[C])LEVEGK|	2|	0.94|	0.0|	0.94	NA	2	1
P80297	50	MT1X	P80297_50	MT1X_HUMAN Metallothionein-1X OS=Homo sapiens OX=9606 GN=MT1X PE=1 SV=1	|CAQGCIC(BTD[C])K	|1	|0.94	|NA	0.94	NA	1	1
Q53H12	34	AGK	Q53H12_34	AGK_HUMAN Acylglycerol kinase, mitochondrial OS=Homo sapiens OX=9606 GN=AGK PE=1 SV=2	|HC(BTD[C])DNLLR	|1	|0.94	|NA	0.94	NA	1	1
Q9Y490	1363	TLN1	Q9Y490_1363	TLN1_HUMAN Talin-1 OS=Homo sapiens OX=9606 GN=TLN1 PE=1 SV=3	EC(BTD[C])DNALR|	3|	0.94|	0.32347|	0.94	NA	3	1
P49368	398	CCT3	P49368_398	TCPG_HUMAN T-complex protein 1 subunit gamma OS=Homo sapiens OX=9606 GN=CCT3 PE=1 SV=4	NLQDAMQVC(BTD[C])R|NLQDAMQVC(BTD[C])R	2|4	0.865|1.01	0.03536|0.32623	0.9375	0.10253	6	2
P26641	266	EEF1G	P26641_266	EF1G_HUMAN Elongation factor 1-gamma OS=Homo sapiens OX=9606 GN=EEF1G PE=1 SV=3	AAAPAPEEEMDEC(BTD[C])EQALAAEPK KAAAPAPEEEMDEC(BTD[C])EQALAAEPK|	3|	0.93|	0.06083|	0.93	NA	3	1
P61006	123	RAB8A	P61006_123	RAB8A_HUMAN Ras-related protein Rab-8A OS=Homo sapiens OX=9606 GN=RAB8A PE=1 SV=1	MILGNKC(BTD[C])DVNDKR|	1|	0.93|	NA|	0.93	NA	1	1
Q02790	103	FKBP4	Q02790_103	FKBP4_HUMAN Peptidyl-prolyl cis-trans isomerase FKBP4 OS=Homo sapiens OX=9606 GN=FKBP4 PE=1 SV=3	VGEVC(BTD[C])HITCKPEYAYGSAGSPPK|	1|	0.93|	NA|	0.93	NA	1	1
P28331	64	NDUFS1	P28331_64	NDUS1_HUMAN NADH-ubiquinone oxidoreductase 75 kDa subunit, mitochondrial OS=Homo sapiens OX=9606 GN=NDUFS1 PE=1 SV=3	FC(BTD[C])YHER|	1|	0.92|	NA|	0.92	NA	1	1
P62140	244	PPP1CB	P62140_244	PP1B_HUMAN Serine/threonine-protein phosphatase PP1-beta catalytic subunit OS=Homo sapiens OX=9606 GN=PPP1CB PE=1 SV=3	HDLDLIC(BTD[C])R|	1|	0.92|	NA|	0.92	NA	1	1
Q6ZS17	1191	RIPOR1	Q6ZS17_1191	RIPR1_HUMAN Rho family-interacting cell polarization regulator 1 OS=Homo sapiens OX=9606 GN=RIPOR1 PE=1 SV=1	|QSLQQC(BTD[C])GEEGQSAHR	|1	|0.92	|NA	0.92	NA	1	1
Q9NZM1	610	MYOF	Q9NZM1_610	MYOF_HUMAN Myoferlin OS=Homo sapiens OX=9606 GN=MYOF PE=1 SV=1	FDTTC(BTD[C])KPLASTTQYSR|	1|	0.92|	NA|	0.92	NA	1	1
O75369	416	FLNB	O75369_416	FLNB_HUMAN Filamin-B OS=Homo sapiens OX=9606 GN=FLNB PE=1 SV=2	C(BTD[C])VYKPMQPGPHVVK|	1|	0.91|	NA|	0.91	NA	1	1
P62937	161	PPIA	P62937_161	PPIA_HUMAN Peptidyl-prolyl cis-trans isomerase A OS=Homo sapiens OX=9606 GN=PPIA PE=1 SV=2	KITIADC(BTD[C])GQLE|	2|	0.91|	0.02828|	0.91	NA	2	1
P63208	120	SKP1	P63208_120	SKP1_HUMAN S-phase kinase-associated protein 1 OS=Homo sapiens OX=9606 GN=SKP1 PE=1 SV=2	GLLDVTC(BTD[C])K|	1|	0.91|	NA|	0.91	NA	1	1
Q3LXA3	404	TKFC	Q3LXA3_404	TKFC_HUMAN Triokinase/FMN cyclase OS=Homo sapiens OX=9606 GN=TKFC PE=1 SV=2	AAGDGDC(BTD[C])GTTHSR|	1|	0.91|	NA|	0.91	NA	1	1
Q96I24	109	FUBP3	Q96I24_109	FUBP3_HUMAN Far upstream element-binding protein 3 OS=Homo sapiens OX=9606 GN=FUBP3 PE=1 SV=2	IQAESGC(BTD[C])K|	1|	0.91|	NA|	0.91	NA	1	1
Q9Y5X1	427	SNX9	Q9Y5X1_427	SNX9_HUMAN Sorting nexin-9 OS=Homo sapiens OX=9606 GN=SNX9 PE=1 SV=1	|RC(BTD[C])TGPLPK	|1	|0.91	|NA	0.91	NA	1	1
P07900	572	HSP90AA1	P07900_572	HS90A_HUMAN Heat shock protein HSP 90-alpha OS=Homo sapiens OX=9606 GN=HSP90AA1 PE=1 SV=5	TKFENLC(BTD[C])K|TKFENLC(BTD[C])K	5|1	0.87|0.94	0.03435|NA	0.905	0.0495	6	2
Q99733	77	NAP1L4	Q99733_77	NP1L4_HUMAN Nucleosome assembly protein 1-like 4 OS=Homo sapiens OX=9606 GN=NAP1L4 PE=1 SV=1	C(BTD[C])AHIEAK|C(BTD[C])AHIEAK	4|1	0.71|1.1	0.24249|NA	0.905	0.27577	5	2
O94952	59	FBXO21	O94952_59	FBX21_HUMAN F-box only protein 21 OS=Homo sapiens OX=9606 GN=FBXO21 PE=2 SV=2	|VSSTC(BTD[C])R	|2	|0.9	|0.0	0.9	NA	2	1
P13639	728	EEF2	P13639_728	EF2_HUMAN Elongation factor 2 OS=Homo sapiens OX=9606 GN=EEF2 PE=1 SV=4	RC(BTD[C])LYASVLTAQPR|	2|	0.9|	0.0|	0.9	NA	2	1
P18206	325	VCL	P18206_325	VINC_HUMAN Vinculin OS=Homo sapiens OX=9606 GN=VCL PE=1 SV=4	|REILGTC(BTD[C])K	|1	|0.9	|NA	0.9	NA	1	1
P31943	34	HNRNPH1	P31943_34	HNRH1_HUMAN Heterogeneous nuclear ribonucleoprotein H OS=Homo sapiens OX=9606 GN=HNRNPH1 PE=1 SV=4	|FFSDC(BTD[C])K	|1	|0.9	|NA	0.9	NA	1	1
P49327	2202	FASN	P49327_2202	FAS_HUMAN Fatty acid synthase OS=Homo sapiens OX=9606 GN=FASN PE=1 SV=3	ADEASELAC(BTD[C])PTPK|	1|	0.9|	NA|	0.9	NA	1	1
P63092	3	GNAS	P63092_3	GNAS2_HUMAN Guanine nucleotide-binding protein G(s) subunit alpha isoforms short OS=Homo sapiens OX=9606 GN=GNAS PE=1 SV=1	|GC(BTD[C])LGNSK	|1	|0.9	|NA	0.9	NA	1	1
Q13526	57	PIN1	Q13526_57	PIN1_HUMAN Peptidyl-prolyl cis-trans isomerase NIMA-interacting 1 OS=Homo sapiens OX=9606 GN=PIN1 PE=1 SV=1	C(BTD[C])SHLLVK|	1|	0.9|	NA|	0.9	NA	1	1
Q14738	410	PPP2R5D	Q14738_410	2A5D_HUMAN Serine/threonine-protein phosphatase 2A 56 kDa regulatory subunit delta isoform OS=Homo sapiens OX=9606 GN=PPP2R5D PE=1 SV=1	C(BTD[C])VSSPHFQVAER|	1|	0.9|	NA|	0.9	NA	1	1
P21333	2582	FLNA	P21333_2582	FLNA_HUMAN Filamin-A OS=Homo sapiens OX=9606 GN=FLNA PE=1 SV=4	|SSFTVDC(BTD[C])SK	|2	|0.895	|0.28991	0.895	NA	2	1
P50991	450	CCT4	P50991_450	TCPD_HUMAN T-complex protein 1 subunit delta OS=Homo sapiens OX=9606 GN=CCT4 PE=1 SV=4	TLSGMESYC(BTD[C])VR|TLSGMESYC(BTD[C])VR	2|2	1.03|0.76	0.0|0.0	0.895	0.19092	4	2
P13987	70	CD59	P13987_70	CD59_HUMAN CD59 glycoprotein OS=Homo sapiens OX=9606 GN=CD59 PE=1 SV=1	FEHC(BTD[C])NFNDVTTR|	1|	0.89|	NA|	0.89	NA	1	1
P34897	91	SHMT2	P34897_91	GLYM_HUMAN Serine hydroxymethyltransferase, mitochondrial OS=Homo sapiens OX=9606 GN=SHMT2 PE=1 SV=3	AALEALGSC(BTD[C])LNNK|	1|	0.89|	NA|	0.89	NA	1	1
Q9UHX1	129	PUF60	Q9UHX1_129	PUF60_HUMAN Poly(U)-binding-splicing factor PUF60 OS=Homo sapiens OX=9606 GN=PUF60 PE=1 SV=1	|ALAIMC(BTD[C])R	|1	|0.89	|NA	0.89	NA	1	1
O00622	337	CCN1	O00622_337	CCN1_HUMAN CCN family member 1 OS=Homo sapiens OX=9606 GN=CCN1 PE=1 SV=1	FRC(BTD[C])EDGETFSK|FRC(BTD[C])EDGETFSK	1|1	0.65|1.12	NA|NA	0.885	0.33234	2	2
O75643	502	SNRNP200	O75643_502	U520_HUMAN U5 small nuclear ribonucleoprotein 200 kDa helicase OS=Homo sapiens OX=9606 GN=SNRNP200 PE=1 SV=2	AALETDENLLLC(BTD[C])APTGAGK|	1|	0.88|	NA|	0.88	NA	1	1
P04083	270	ANXA1	P04083_270	ANXA1_HUMAN Annexin A1 OS=Homo sapiens OX=9606 GN=ANXA1 PE=1 SV=2	C(BTD[C])ATSKPAFFAEK|C(BTD[C])ATSKPAFFAEK	1|1	0.86|0.9	NA|NA	0.88	0.02828	2	2
P26641	210	EEF1G	P26641_210	EF1G_HUMAN Elongation factor 1-gamma OS=Homo sapiens OX=9606 GN=EEF1G PE=1 SV=3	AVLGEVKLC(BTD[C])EK|AVLGEVKLC(BTD[C])EK	3|3	0.87|0.89	0.02309|0.01155	0.88	0.01414	6	2
Q01813	411	PFKP	Q01813_411	PFKAP_HUMAN ATP-dependent 6-phosphofructokinase, platelet type OS=Homo sapiens OX=9606 GN=PFKP PE=1 SV=2	TNC(BTD[C])NVAVINVGAPAAGMNAAVR|	1|	0.88|	NA|	0.88	NA	1	1
Q06265	9	EXOSC9	Q06265_9	EXOS9_HUMAN Exosome complex component RRP45 OS=Homo sapiens OX=9606 GN=EXOSC9 PE=1 SV=3	|ETPLSNC(BTD[C])ER	|1	|0.88	|NA	0.88	NA	1	1
Q96HC4	420	PDLIM5	Q96HC4_420	PDLI5_HUMAN PDZ and LIM domain protein 5 OS=Homo sapiens OX=9606 GN=PDLIM5 PE=1 SV=5	|TPMC(BTD[C])AHCNQVIR	|1	|0.88	|NA	0.88	NA	1	1
Q9BW27	112	NUP85	Q9BW27_112	NUP85_HUMAN Nuclear pore complex protein Nup85 OS=Homo sapiens OX=9606 GN=NUP85 PE=1 SV=1	|AC(BTD[C])MEEMHQVAIAAK	|1	|0.88	|NA	0.88	NA	1	1
Q9UL26	9	RAB22A	Q9UL26_9	RB22A_HUMAN Ras-related protein Rab-22A OS=Homo sapiens OX=9606 GN=RAB22A PE=1 SV=2	VC(BTD[C])LLGDTGVGK|	1|	0.88|	NA|	0.88	NA	1	1
Q6IQ22	183	RAB12	Q6IQ22_183	RAB12_HUMAN Ras-related protein Rab-12 OS=Homo sapiens OX=9606 GN=RAB12 PE=1 SV=3	FC(BTD[C])EASAK|FC(BTD[C])EASAK	1|1	1.07|0.68	NA|NA	0.875	0.27577	2	2
O75083	194	WDR1	O75083_194	WDR1_HUMAN WD repeat-containing protein 1 OS=Homo sapiens OX=9606 GN=WDR1 PE=1 SV=4	FVNC(BTD[C])VR|	2|	0.87|	0.0|	0.87	NA	2	1
P00491	78	PNP	P00491_78	PNPH_HUMAN Purine nucleoside phosphorylase OS=Homo sapiens OX=9606 GN=PNP PE=1 SV=2	AC(BTD[C])VMMQGR|AC(BTD[C])VMMQGR	9|6	0.72|1.02	0.0996|0.22693	0.87	0.21213	15	2
P10620	50	MGST1	P10620_50	MGST1_HUMAN Microsomal glutathione S-transferase 1 OS=Homo sapiens OX=9606 GN=MGST1 PE=1 SV=1	KVFANPEDC(BTD[C])VAFGK|	1|	0.87|	NA|	0.87	NA	1	1
P11940	132	PABPC1	P11940_132	PABP1_HUMAN Polyadenylate-binding protein 1 OS=Homo sapiens OX=9606 GN=PABPC1 PE=1 SV=2	VVC(BTD[C])DENGSK|	1|	0.87|	NA|	0.87	NA	1	1
P16615	364	ATP2A2	P16615_364	AT2A2_HUMAN Sarcoplasmic/endoplasmic reticulum calcium ATPase 2 OS=Homo sapiens OX=9606 GN=ATP2A2 PE=1 SV=1	TGTLTTNQMSVC(BTD[C])R|	1|	0.87|	NA|	0.87	NA	1	1
P21399	369	ACO1	P21399_369	ACOC_HUMAN Cytoplasmic aconitate hydratase OS=Homo sapiens OX=9606 GN=ACO1 PE=1 SV=3	|TVVPC(BTD[C])CSGPK	|1	|0.87	|NA	0.87	NA	1	1
P60891	165	PRPS1	P60891_165	PRPS1_HUMAN Ribose-phosphate pyrophosphokinase 1 OS=Homo sapiens OX=9606 GN=PRPS1 PE=1 SV=2	NC(BTD[C])TIVSPDAGGAK|NC(BTD[C])TIVSPDAGGAK	1|2	0.89|0.85	NA|0.0	0.87	0.02828	3	2
Q01469	67	FABP5	Q01469_67	FABP5_HUMAN Fatty acid-binding protein 5 OS=Homo sapiens OX=9606 GN=FABP5 PE=1 SV=3	TTQFSC(BTD[C])TLGEK|	1|	0.87|	NA|	0.87	NA	1	1
Q5VZF2	182	MBNL2	Q5VZF2_182	MBNL2_HUMAN Muscleblind-like protein 2 OS=Homo sapiens OX=9606 GN=MBNL2 PE=1 SV=2	TDKLEVC(BTD[C])R|TDKLEVC(BTD[C])R	1|1	0.67|1.07	NA|NA	0.87	0.28284	2	2
O75369	2115	FLNB	O75369_2115	FLNB_HUMAN Filamin-B OS=Homo sapiens OX=9606 GN=FLNB PE=1 SV=2	APSVATVGSIC(BTD[C])DLNLK|APSVATVGSIC(BTD[C])DLNLK	2|1	0.72|1.01	0.0|NA	0.865	0.20506	3	2
P41250	466	GARS	P41250_466	GARS_HUMAN Glycine--tRNA ligase OS=Homo sapiens OX=9606 GN=GARS PE=1 SV=3	SC(BTD[C])YDLSCHAR|SC(BTD[C])YDLSCHAR	1|1	0.86|0.87	NA|NA	0.865	0.00707	2	2
O75369	1617	FLNB	O75369_1617	FLNB_HUMAN Filamin-B OS=Homo sapiens OX=9606 GN=FLNB PE=1 SV=2	C(BTD[C])LATGPGIASTVK|	1|	0.86|	NA|	0.86	NA	1	1
O94804	722	STK10	O94804_722	STK10_HUMAN Serine/threonine-protein kinase 10 OS=Homo sapiens OX=9606 GN=STK10 PE=1 SV=1	EIC(BTD[C])DKER|	1|	0.86|	NA|	0.86	NA	1	1
P30101	92	PDIA3	P30101_92	PDIA3_HUMAN Protein disulfide-isomerase A3 OS=Homo sapiens OX=9606 GN=PDIA3 PE=1 SV=4	|VDCTANTNTC(BTD[C])NK	|1	|0.86	|NA	0.86	NA	1	1
Q01780	93	EXOSC10	Q01780_93	EXOSX_HUMAN Exosome component 10 OS=Homo sapiens OX=9606 GN=EXOSC10 PE=1 SV=2	VMQYHGC(BTD[C])R|	1|	0.86|	NA|	0.86	NA	1	1
Q14566	185	MCM6	Q14566_185	MCM6_HUMAN DNA replication licensing factor MCM6 OS=Homo sapiens OX=9606 GN=MCM6 PE=1 SV=1	|NPVC(BTD[C])ANR	|1	|0.86	|NA	0.86	NA	1	1
Q7L5N1	299	COPS6	Q7L5N1_299	CSN6_HUMAN COP9 signalosome complex subunit 6 OS=Homo sapiens OX=9606 GN=COPS6 PE=1 SV=1	|TC(BTD[C])NTMNQFVNK	|1	|0.86	|NA	0.86	NA	1	1
Q9Y2S7	143	POLDIP2	Q9Y2S7_143	PDIP2_HUMAN Polymerase delta-interacting protein 2 OS=Homo sapiens OX=9606 GN=POLDIP2 PE=1 SV=1	|DC(BTD[C])PHISQR	|2	|0.86	|0.0	0.86	NA	2	1
P05362	332	ICAM1	P05362_332	ICAM1_HUMAN Intercellular adhesion molecule 1 OS=Homo sapiens OX=9606 GN=ICAM1 PE=1 SV=2	C(BTD[C])EAHPR|C(BTD[C])EAHPR	2|2	0.79|0.92	0.0|0.01414	0.855	0.09192	4	2
P61586	159	RHOA	P61586_159	RHOA_HUMAN Transforming protein RhoA OS=Homo sapiens OX=9606 GN=RHOA PE=1 SV=1	IGAFGYMEC(BTD[C])SAK|IGAFGYMEC(BTD[C])SAK	1|3	0.99|0.72	NA|0.0	0.855	0.19092	4	2
Q15185	40	PTGES3	Q15185_40	TEBP_HUMAN Prostaglandin E synthase 3 OS=Homo sapiens OX=9606 GN=PTGES3 PE=1 SV=1	|LTFSC(BTD[C])LGGSDNFK	|2	|0.855	|0.02121	0.855	NA	2	1
Q99832	370	CCT7	Q99832_370	TCPH_HUMAN T-complex protein 1 subunit eta OS=Homo sapiens OX=9606 GN=CCT7 PE=1 SV=2	TC(BTD[C])TFILR|TC(BTD[C])TFILR	1|2	0.92|0.79	NA|0.01414	0.855	0.09192	3	2
P17987	397	TCP1	P17987_397	TCPA_HUMAN T-complex protein 1 subunit alpha OS=Homo sapiens OX=9606 GN=TCP1 PE=1 SV=1	SLHDALC(BTD[C])VVK|SLHDALC(BTD[C])VVK	2|2	0.785|0.92	0.00707|0.0	0.8525	0.09546	4	2
O15144	120	ARPC2	O15144_120	ARPC2_HUMAN Actin-related protein 2/3 complex subunit 2 OS=Homo sapiens OX=9606 GN=ARPC2 PE=1 SV=1	NC(BTD[C])FASVFEK|NC(BTD[C])FASVFEK	1|2	0.85|0.85	NA|0.0	0.85	0	3	2
O15523	339	DDX3Y	O15523_339	DDX3Y_HUMAN ATP-dependent RNA helicase DDX3Y OS=Homo sapiens OX=9606 GN=DDX3Y PE=1 SV=2	IGLDFC(BTD[C])K|	2|	0.85|	0.07071|	0.85	NA	2	1
P36776	576	LONP1	P36776_576	LONM_HUMAN Lon protease homolog, mitochondrial OS=Homo sapiens OX=9606 GN=LONP1 PE=1 SV=2	IIQC(BTD[C])LKK|	1|	0.85|	NA|	0.85	NA	1	1
P62424	182	RPL7A	P62424_182	RL7A_HUMAN 60S ribosomal protein L7a OS=Homo sapiens OX=9606 GN=RPL7A PE=1 SV=2	MGVPYC(BTD[C])IIK|MGVPYC(BTD[C])IIK	1|1	0.89|0.81	NA|NA	0.85	0.05657	2	2
Q12765	290	SCRN1	Q12765_290	SCRN1_HUMAN Secernin-1 OS=Homo sapiens OX=9606 GN=SCRN1 PE=1 SV=2	SSPC(BTD[C])IHYFTGTPDPSR|	1|	0.85|	NA|	0.85	NA	1	1
Q14847	20	LASP1	Q14847_20	LASP1_HUMAN LIM and SH3 domain protein 1 OS=Homo sapiens OX=9606 GN=LASP1 PE=1 SV=2	VNC(BTD[C])LDK|	1|	0.85|	NA|	0.85	NA	1	1
Q8TEX9	782	IPO4	Q8TEX9_782	IPO4_HUMAN Importin-4 OS=Homo sapiens OX=9606 GN=IPO4 PE=1 SV=2	SC(BTD[C])GTLTLKPPGR|SC(BTD[C])GTLTLKPPGR	1|2	0.69|1.01	NA|0.0	0.85	0.22627	3	2
P11172	174	UMPS	P11172_174	UMPS_HUMAN Uridine 5'-monophosphate synthase OS=Homo sapiens OX=9606 GN=UMPS PE=1 SV=1	LHSVC(BTD[C])TLSK|LHSVC(BTD[C])TLSK	1|2	1.04|0.655	NA|0.0495	0.8475	0.27224	3	2
P22102	291	GART	P22102_291	PUR2_HUMAN Trifunctional purine biosynthetic protein adenosine-3 OS=Homo sapiens OX=9606 GN=GART PE=1 SV=1	VLEFNC(BTD[C])R|	2|	0.84|	0.0|	0.84	NA	2	1
P22314	234	UBA1	P22314_234	UBA1_HUMAN Ubiquitin-like modifier-activating enzyme 1 OS=Homo sapiens OX=9606 GN=UBA1 PE=1 SV=3	DNPGVVTC(BTD[C])LDEAR|	1|	0.84|	NA|	0.84	NA	1	1
P29144	1218	TPP2	P29144_1218	TPP2_HUMAN Tripeptidyl-peptidase 2 OS=Homo sapiens OX=9606 GN=TPP2 PE=1 SV=4	NC(BTD[C])IQLMK|	1|	0.84|	NA|	0.84	NA	1	1
P62241	100	RPS8	P62241_100	RS8_HUMAN 40S ribosomal protein S8 OS=Homo sapiens OX=9606 GN=RPS8 PE=1 SV=2	NC(BTD[C])IVLIDSTPYR|	2|	0.84|	0.0|	0.84	NA	2	1
Q12933	124	TRAF2	Q12933_124	TRAF2_HUMAN TNF receptor-associated factor 2 OS=Homo sapiens OX=9606 GN=TRAF2 PE=1 SV=2	EYESC(BTD[C])HEGR|	1|	0.84|	NA|	0.84	NA	1	1
Q5TA50	105	CPTP	Q5TA50_105	CPTP_HUMAN Ceramide-1-phosphate transfer protein OS=Homo sapiens OX=9606 GN=CPTP PE=1 SV=1	SHHPESGC(BTD[C])R|	1|	0.84|	NA|	0.84	NA	1	1
Q9BXP5	421	SRRT	Q9BXP5_421	SRRT_HUMAN Serrate RNA effector molecule homolog OS=Homo sapiens OX=9606 GN=SRRT PE=1 SV=1	TC(BTD[C])SLFMR|TC(BTD[C])SLFMR	1|1	0.8|0.88	NA|NA	0.84	0.05657	2	2
Q9UBU9	252	NXF1	Q9UBU9_252	NXF1_HUMAN Nuclear RNA export factor 1 OS=Homo sapiens OX=9606 GN=NXF1 PE=1 SV=1	|SC(BTD[C])MAATLR	|1	|0.84	|NA	0.84	NA	1	1
P00558	50	PGK1	P00558_50	PGK1_HUMAN Phosphoglycerate kinase 1 OS=Homo sapiens OX=9606 GN=PGK1 PE=1 SV=3	FC(BTD[C])LDNGAK|FC(BTD[C])LDNGAK	2|3	0.87|0.8	0.0|0.0	0.835	0.0495	5	2
Q8NBS9	128	TXNDC5	Q8NBS9_128	TXND5_HUMAN Thioredoxin domain-containing protein 5 OS=Homo sapiens OX=9606 GN=TXNDC5 PE=1 SV=2	VDCTAHSDVC(BTD[C])SAQGVR|	2|	0.835|	0.13435|	0.835	NA	2	1
P00505	295	GOT2	P00505_295	AATM_HUMAN Aspartate aminotransferase, mitochondrial OS=Homo sapiens OX=9606 GN=GOT2 PE=1 SV=3	VGAFTMVC(BTD[C])K|VGAFTMVC(BTD[C])K	2|2	0.81|0.855	0.04243|0.13435	0.8325	0.03182	4	2
P19367	823	HK1	P19367_823	HXK1_HUMAN Hexokinase-1 OS=Homo sapiens OX=9606 GN=HK1 PE=1 SV=3	TVC(BTD[C])GVVSR|TVC(BTD[C])GVVSR	1|2	0.98|0.68	NA|0.0	0.83	0.21213	3	2
P26368	464	U2AF2	P26368_464	U2AF2_HUMAN Splicing factor U2AF 65 kDa subunit OS=Homo sapiens OX=9606 GN=U2AF2 PE=1 SV=4	YC(BTD[C])DPDSYHR|YC(BTD[C])DPDSYHR	1|3	0.82|0.84	NA|0.08185	0.83	0.01414	4	2
P50990	148	CCT8	P50990_148	TCPQ_HUMAN T-complex protein 1 subunit theta OS=Homo sapiens OX=9606 GN=CCT8 PE=1 SV=4	AHEILPNLVC(BTD[C])CSAK|	2|	0.83|	0.0|	0.83	NA	2	1
P63104	25	YWHAZ	P63104_25	1433Z_HUMAN 14-3-3 protein zeta/delta OS=Homo sapiens OX=9606 GN=YWHAZ PE=1 SV=1	YDDMAAC(BTD[C])MK|YDDMAAC(BTD[C])MK	9|15	0.81|0.85	0.0159|0.05193	0.83	0.02828	24	2
Q99615	58	DNAJC7	Q99615_58	DNJC7_HUMAN DnaJ homolog subfamily C member 7 OS=Homo sapiens OX=9606 GN=DNAJC7 PE=1 SV=2	AIDMC(BTD[C])PK|AIDMC(BTD[C])PK	1|1	0.67|0.99	NA|NA	0.83	0.22627	2	2
Q9BV44	239	THUMPD3	Q9BV44_239	THUM3_HUMAN THUMP domain-containing protein 3 OS=Homo sapiens OX=9606 GN=THUMPD3 PE=1 SV=1	|HC(BTD[C])FTSNEAAR	|1	|0.83	|NA	0.83	NA	1	1
Q9BY42	51	RTF2	Q9BY42_51	RTF2_HUMAN Replication termination factor 2 OS=Homo sapiens OX=9606 GN=RTF2 PE=1 SV=3	RPIVAC(BTD[C])ELGR|	1|	0.83|	NA|	0.83	NA	1	1
Q02978	184	SLC25A11	Q02978_184	M2OM_HUMAN Mitochondrial 2-oxoglutarate/malate carrier protein OS=Homo sapiens OX=9606 GN=SLC25A11 PE=1 SV=3	GC(BTD[C])IPTMAR|GC(BTD[C])IPTMAR	1|1	1.01|0.64	NA|NA	0.825	0.26163	2	2
O15355	351	PPM1G	O15355_351	PPM1G_HUMAN Protein phosphatase 1G OS=Homo sapiens OX=9606 GN=PPM1G PE=1 SV=1	C(BTD[C])VVSEAGK|	1|	0.82|	NA|	0.82	NA	1	1
P11586	785	MTHFD1	P11586_785	C1TC_HUMAN C-1-tetrahydrofolate synthase, cytoplasmic OS=Homo sapiens OX=9606 GN=MTHFD1 PE=1 SV=3	C(BTD[C])THWAEGGK|C(BTD[C])THWAEGGK	1|1	0.83|0.81	NA|NA	0.82	0.01414	2	2
P23919	163	DTYMK	P23919_163	KTHY_HUMAN Thymidylate kinase OS=Homo sapiens OX=9606 GN=DTYMK PE=1 SV=4	C(BTD[C])FHQLMK|	1|	0.82|	NA|	0.82	NA	1	1
Q7Z5K2	776	WAPL	Q7Z5K2_776	WAPL_HUMAN Wings apart-like protein homolog OS=Homo sapiens OX=9606 GN=WAPL PE=1 SV=1	LC(BTD[C])ETVHNK|LC(BTD[C])ETVHNK	1|1	0.84|0.8	NA|NA	0.82	0.02828	2	2
Q8NBS9	121	TXNDC5	Q8NBS9_121	TXND5_HUMAN Thioredoxin domain-containing protein 5 OS=Homo sapiens OX=9606 GN=TXNDC5 PE=1 SV=2	VDC(BTD[C])TAHSDVCSAQGVR|	1|	0.82|	NA|	0.82	NA	1	1
Q96KG9	261	SCYL1	Q96KG9_261	SCYL1_HUMAN N-terminal kinase-like protein OS=Homo sapiens OX=9606 GN=SCYL1 PE=1 SV=1	FLQNC(BTD[C])R|	1|	0.82|	NA|	0.82	NA	1	1
Q9UPN3	815	MACF1	Q9UPN3_815	MACF1_HUMAN Microtubule-actin cross-linking factor 1, isoforms 1/2/3/5 OS=Homo sapiens OX=9606 GN=MACF1 PE=1 SV=4	|YSC(BTD[C])DHNTSLSR	|1	|0.82	|NA	0.82	NA	1	1
Q9Y3E7	60	CHMP3	Q9Y3E7_60	CHMP3_HUMAN Charged multivesicular body protein 3 OS=Homo sapiens OX=9606 GN=CHMP3 PE=1 SV=3	DVC(BTD[C])IVLAK|	1|	0.82|	NA|	0.82	NA	1	1
P21980	27	TGM2	P21980_27	TGM2_HUMAN Protein-glutamine gamma-glutamyltransferase 2 OS=Homo sapiens OX=9606 GN=TGM2 PE=1 SV=2	DHHTADLC(BTD[C])R|DHHTADLC(BTD[C])R	3|3	0.71|0.92	0.02646|0.07506	0.815	0.14849	6	2
P31689	149	DNAJA1	P31689_149	DNJA1_HUMAN DnaJ homolog subfamily A member 1 OS=Homo sapiens OX=9606 GN=DNAJA1 PE=1 SV=2	KGAVEC(BTD[C])CPNCR GAVEC(BTD[C])CPNCR|GAVEC(BTD[C])CPNCR	2|1	0.66|0.97	0.15556|NA	0.815	0.2192	3	2
P30498	283	HLA-B	P30498_283	1B78_HUMAN HLA class I histocompatibility antigen, B-78 alpha chain OS=Homo sapiens OX=9606 GN=HLA-B PE=1 SV=1	|YTC(BTD[C])HVQHEGLPK	|1	|0.81	|NA	0.81	NA	1	1
P61978	184	HNRNPK	P61978_184	HNRPK_HUMAN Heterogeneous nuclear ribonucleoprotein K OS=Homo sapiens OX=9606 GN=HNRNPK PE=1 SV=1	LFQEC(BTD[C])CPHSTDR|LFQEC(BTD[C])CPHSTDR	3|1	0.75|0.87	0.0866|NA	0.81	0.08485	4	2
P62195	209	PSMC5	P62195_209	PRS8_HUMAN 26S proteasome regulatory subunit 8 OS=Homo sapiens OX=9606 GN=PSMC5 PE=1 SV=1	AVAHHTDC(BTD[C])TFIR|	1|	0.81|	NA|	0.81	NA	1	1
P63241	73	EIF5A	P63241_73	IF5A1_HUMAN Eukaryotic translation initiation factor 5A-1 OS=Homo sapiens OX=9606 GN=EIF5A PE=1 SV=2	KYEDIC(BTD[C])PSTHNMDVPNIK YEDIC(BTD[C])PSTHNMDVPNIK|	5|	0.81|	0.0911|	0.81	NA	5	1
Q9Y383	44	LUC7L2	Q9Y383_44	LC7L2_HUMAN Putative RNA-binding protein Luc7-like 2 OS=Homo sapiens OX=9606 GN=LUC7L2 PE=1 SV=2	|LNCC(BTD[C])PHDVLSGTR	|1	|0.81	|NA	0.81	NA	1	1
Q9Y3F4	305	STRAP	Q9Y3F4_305	STRAP_HUMAN Serine-threonine kinase receptor-associated protein OS=Homo sapiens OX=9606 GN=STRAP PE=1 SV=1	C(BTD[C])VLPEEDSGELAKPK|	1|	0.81|	NA|	0.81	NA	1	1
O00232	74	PSMD12	O00232_74	PSD12_HUMAN 26S proteasome non-ATPase regulatory subunit 12 OS=Homo sapiens OX=9606 GN=PSMD12 PE=1 SV=3	MC(BTD[C])YEAK|MC(BTD[C])YEAK	1|1	0.91|0.7	NA|NA	0.805	0.14849	2	2
P08559	273	PDHA1	P08559_273	ODPA_HUMAN Pyruvate dehydrogenase E1 component subunit alpha, somatic form, mitochondrial OS=Homo sapiens OX=9606 GN=PDHA1 PE=1 SV=3	FAAAYC(BTD[C])R|FAAAYC(BTD[C])R	1|1	0.72|0.89	NA|NA	0.805	0.12021	2	2
P49368	372	CCT3	P49368_372	TCPG_HUMAN T-complex protein 1 subunit gamma OS=Homo sapiens OX=9606 GN=CCT3 PE=1 SV=4	AC(BTD[C])TILLR|AC(BTD[C])TILLR	2|3	0.69|0.92	0.0|0.0	0.805	0.16263	5	2
P55209	388	NAP1L1	P55209_388	NP1L1_HUMAN Nucleosome assembly protein 1-like 1 OS=Homo sapiens OX=9606 GN=NAP1L1 PE=1 SV=1	KDQNPAEC(BTD[C])K|KDQNPAEC(BTD[C])K	3|2	0.83|0.78	0.0|0.35355	0.805	0.03536	5	2
P60953	157	CDC42	P60953_157	CDC42_HUMAN Cell division control protein 42 homolog OS=Homo sapiens OX=9606 GN=CDC42 PE=1 SV=2	YVEC(BTD[C])SALTQK|	2|	0.805|	0.26163|	0.805	NA	2	1
Q99460	104	PSMD1	Q99460_104	PSMD1_HUMAN 26S proteasome non-ATPase regulatory subunit 1 OS=Homo sapiens OX=9606 GN=PSMD1 PE=1 SV=2	C(BTD[C])IDHYTK|C(BTD[C])IDHYTK	2|1	0.94|0.67	0.0|NA	0.805	0.19092	3	2
O00159	585	MYO1C	O00159_585	MYO1C_HUMAN Unconventional myosin-Ic OS=Homo sapiens OX=9606 GN=MYO1C PE=1 SV=4	NPIMSQC(BTD[C])FDR|	1|	0.8|	NA|	0.8	NA	1	1
P61158	235	ACTR3	P61158_235	ARP3_HUMAN Actin-related protein 3 OS=Homo sapiens OX=9606 GN=ACTR3 PE=1 SV=3	YSYVC(BTD[C])PDLVK|YSYVC(BTD[C])PDLVK	2|1	0.81|0.79	0.0|NA	0.8	0.01414	3	2
P61221	201	ABCE1	P61221_201	ABCE1_HUMAN ATP-binding cassette sub-family E member 1 OS=Homo sapiens OX=9606 GN=ABCE1 PE=1 SV=1	TQAIVC(BTD[C])QQLDLTHLK|	1|	0.8|	NA|	0.8	NA	1	1
Q96EY7	260	PTCD3	Q96EY7_260	PTCD3_HUMAN Pentatricopeptide repeat domain-containing protein 3, mitochondrial OS=Homo sapiens OX=9606 GN=PTCD3 PE=1 SV=3	NEHSYC(BTD[C])TMIR|NEHSYC(BTD[C])TMIR	3|1	0.65|0.95	0.06928|NA	0.8	0.21213	4	2
Q99426	216	TBCB	Q99426_216	TBCB_HUMAN Tubulin-folding cofactor B OS=Homo sapiens OX=9606 GN=TBCB PE=1 SV=2	|YFEC(BTD[C])QAK	|1	|0.8	|NA	0.8	NA	1	1
Q9Y305	299	ACOT9	Q9Y305_299	ACOT9_HUMAN Acyl-coenzyme A thioesterase 9, mitochondrial OS=Homo sapiens OX=9606 GN=ACOT9 PE=1 SV=2	SLEIC(BTD[C])HPQER|	1|	0.8|	NA|	0.8	NA	1	1
Q9UBQ5	87	EIF3K	Q9UBQ5_87	EIF3K_HUMAN Eukaryotic translation initiation factor 3 subunit K OS=Homo sapiens OX=9606 GN=EIF3K PE=1 SV=1	C(BTD[C])MIDQAHQEERPIR|C(BTD[C])MIDQAHQEERPIR	2|1	0.885|0.71	0.57276|NA	0.7975	0.12374	3	2
Q6UXY1	136	BAIAP2L2	Q6UXY1_136	BI2L2_HUMAN Brain-specific angiogenesis inhibitor 1-associated protein 2-like protein 2 OS=Homo sapiens OX=9606 GN=BAIAP2L2 PE=1 SV=1	C(BTD[C])MSELWR|C(BTD[C])MSELWR	1|1	0.73|0.86	NA|NA	0.795	0.09192	2	2
A1L0T0	608	ILVBL	A1L0T0_608	ILVBL_HUMAN Acetolactate synthase-like protein OS=Homo sapiens OX=9606 GN=ILVBL PE=1 SV=2	|VLHDAQQQC(BTD[C])R	|1	|0.79	|NA	0.79	NA	1	1
O43390	226	HNRNPR	O43390_226	HNRPR_HUMAN Heterogeneous nuclear ribonucleoprotein R OS=Homo sapiens OX=9606 GN=HNRNPR PE=1 SV=1	LC(BTD[C])DSYEIRPGK|	2|	0.79|	0.0|	0.79	NA	2	1
P04632	144	CAPNS1	P04632_144	CPNS1_HUMAN Calpain small subunit 1 OS=Homo sapiens OX=9606 GN=CAPNS1 PE=1 SV=1	TDGFGIDTC(BTD[C])R|	2|	0.79|	0.0|	0.79	NA	2	1
P10809	442	HSPD1	P10809_442	CH60_HUMAN 60 kDa heat shock protein, mitochondrial OS=Homo sapiens OX=9606 GN=HSPD1 PE=1 SV=2	AAVEEGIVLGGGC(BTD[C])ALLR|	1|	0.79|	NA|	0.79	NA	1	1
P30046	24	DDT	P30046_24	DOPD_HUMAN D-dopachrome decarboxylase OS=Homo sapiens OX=9606 GN=DDT PE=1 SV=3	RLC(BTD[C])AAAASILGK|	1|	0.79|	NA|	0.79	NA	1	1
P50579	380	METAP2	P50579_380	MAP2_HUMAN Methionine aminopeptidase 2 OS=Homo sapiens OX=9606 GN=METAP2 PE=1 SV=1	GVVHDDMEC(BTD[C])SHYMK|	1|	0.79|	NA|	0.79	NA	1	1
P62906	74	RPL10A	P62906_74	RL10A_HUMAN 60S ribosomal protein L10a OS=Homo sapiens OX=9606 GN=RPL10A PE=1 SV=2	FSVCVLGDQQHC(BTD[C])DEAK|	1|	0.79|	NA|	0.79	NA	1	1
Q00653	57	NFKB2	Q00653_57	NFKB2_HUMAN Nuclear factor NF-kappa-B p100 subunit OS=Homo sapiens OX=9606 GN=NFKB2 PE=1 SV=4	|YGC(BTD[C])EGPSHGGLPGASSEK	|1	|0.79	|NA	0.79	NA	1	1
Q9H4G0	127	EPB41L1	Q9H4G0_127	E41L1_HUMAN Band 4.1-like protein 1 OS=Homo sapiens OX=9606 GN=EPB41L1 PE=1 SV=2	VC(BTD[C])EHLNLLEK|VC(BTD[C])EHLNLLEK	1|1	0.94|0.64	NA|NA	0.79	0.21213	2	2
Q9NSV4	1104	DIAPH3	Q9NSV4_1104	DIAP3_HUMAN Protein diaphanous homolog 3 OS=Homo sapiens OX=9606 GN=DIAPH3 PE=1 SV=4	VC(BTD[C])NHENQK|	1|	0.79|	NA|	0.79	NA	1	1
O75369	1952	FLNB	O75369_1952	FLNB_HUMAN Filamin-B OS=Homo sapiens OX=9606 GN=FLNB PE=1 SV=2	DEPC(BTD[C])LLK|DEPC(BTD[C])LLK	1|2	0.68|0.89	NA|0.5374	0.785	0.14849	3	2
P23528	39	CFL1	P23528_39	COF1_HUMAN Cofilin-1 OS=Homo sapiens OX=9606 GN=CFL1 PE=1 SV=3	AVLFC(BTD[C])LSEDKK|AVLFC(BTD[C])LSEDKK	4|4	0.81|0.76	0.09912|0.06608	0.785	0.03536	8	2
Q29RF7	430	PDS5A	Q29RF7_430	PDS5A_HUMAN Sister chromatid cohesion protein PDS5 homolog A OS=Homo sapiens OX=9606 GN=PDS5A PE=1 SV=1	KYC(BTD[C])LHGEAGK YC(BTD[C])LHGEAGK|	2|	0.785|	0.17678|	0.785	NA	2	1
P11142	603	HSPA8	P11142_603	HSP7C_HUMAN Heat shock cognate 71 kDa protein OS=Homo sapiens OX=9606 GN=HSPA8 PE=1 SV=1	ELEKVC(BTD[C])NPIITK VC(BTD[C])NPIITK|ELEKVC(BTD[C])NPIITK VC(BTD[C])NPIITK	6|8	0.815|0.75	0.05947|0.03357	0.7825	0.04596	14	2
P52209	289	PGD	P52209_289	6PGD_HUMAN 6-phosphogluconate dehydrogenase, decarboxylating OS=Homo sapiens OX=9606 GN=PGD PE=1 SV=3	C(BTD[C])LSSLKDER|	1|	0.78|	NA|	0.78	NA	1	1
Q99442	32	SEC62	Q99442_32	SEC62_HUMAN Translocation protein SEC62 OS=Homo sapiens OX=9606 GN=SEC62 PE=1 SV=1	FNC(BTD[C])PTK|	1|	0.78|	NA|	0.78	NA	1	1
Q08211	469	DHX9	Q08211_469	DHX9_HUMAN ATP-dependent RNA helicase A OS=Homo sapiens OX=9606 GN=DHX9 PE=1 SV=4	SC(BTD[C])GYSVR|	2|	0.775|	0.0495|	0.775	NA	2	1
P35579	1379	MYH9	P35579_1379	MYH9_HUMAN Myosin-9 OS=Homo sapiens OX=9606 GN=MYH9 PE=1 SV=4	KMEDSVGC(BTD[C])LETAEEVKR MEDSVGC(BTD[C])LETAEEVKR KMEDSVGC(BTD[C])LETAEEVK MEDSVGC(BTD[C])LETAEEVK|KMEDSVGC(BTD[C])LETAEEVK	6|1	0.83|0.71	0.23036|NA	0.77	0.08485	7	2
Q04917	112	YWHAH	Q04917_112	1433F_HUMAN 14-3-3 protein eta OS=Homo sapiens OX=9606 GN=YWHAH PE=1 SV=4	NC(BTD[C])NDFQYESK|	3|	0.77|	0.05196|	0.77	NA	3	1
Q99832	158	CCT7	Q99832_158	TCPH_HUMAN T-complex protein 1 subunit eta OS=Homo sapiens OX=9606 GN=CCT7 PE=1 SV=2	C(BTD[C])AMTALSSK LLEKC(BTD[C])AMTALSSK|C(BTD[C])AMTALSSK LLEKC(BTD[C])AMTALSSK	4|6	0.82|0.72	0.09238|0.07607	0.77	0.07071	10	2
Q9BWF3	89	RBM4	Q9BWF3_89	RBM4_HUMAN RNA-binding protein 4 OS=Homo sapiens OX=9606 GN=RBM4 PE=1 SV=1	|LHVGNISPTC(BTD[C])TNK	|1	|0.77	|NA	0.77	NA	1	1
Q9Y490	1509	TLN1	Q9Y490_1509	TLN1_HUMAN Talin-1 OS=Homo sapiens OX=9606 GN=TLN1 PE=1 SV=3	HTSALCNSC(BTD[C])R|	1|	0.77|	NA|	0.77	NA	1	1
Q9Y490	2408	TLN1	Q9Y490_2408	TLN1_HUMAN Talin-1 OS=Homo sapiens OX=9606 GN=TLN1 PE=1 SV=3	MVAAATNNLC(BTD[C])EAANAAVQGHASQEK|MVAAATNNLC(BTD[C])EAANAAVQGHASQEK	1|1	0.58|0.95	NA|NA	0.765	0.26163	2	2
P21266	119	GSTM3	P21266_119	GSTM3_HUMAN Glutathione S-transferase Mu 3 OS=Homo sapiens OX=9606 GN=GSTM3 PE=1 SV=3	|LC(BTD[C])YSSDHEK	|4	|0.76	|0.23286	0.76	NA	4	1
P27348	25	YWHAQ	P27348_25	1433T_HUMAN 14-3-3 protein theta OS=Homo sapiens OX=9606 GN=YWHAQ PE=1 SV=1	ERYDDMATC(BTD[C])MK YDDMATC(BTD[C])MK|ERYDDMATC(BTD[C])MK YDDMATC(BTD[C])MK	15|11	0.72|0.8	0.12872|0.17807	0.76	0.05657	26	2
Q13619	483	CUL4A	Q13619_483	CUL4A_HUMAN Cullin-4A OS=Homo sapiens OX=9606 GN=CUL4A PE=1 SV=3	LKHEC(BTD[C])GAAFTSK|	1|	0.76|	NA|	0.76	NA	1	1
Q96C86	37	DCPS	Q96C86_37	DCPS_HUMAN m7GpppX diphosphatase OS=Homo sapiens OX=9606 GN=DCPS PE=1 SV=2	EAGVGNGTC(BTD[C])APVR|	1|	0.76|	NA|	0.76	NA	1	1
Q9NRL3	713	STRN4	Q9NRL3_713	STRN4_HUMAN Striatin-4 OS=Homo sapiens OX=9606 GN=STRN4 PE=1 SV=2	TC(BTD[C])VQEITAHR|	3|	0.76|	0.11547|	0.76	NA	3	1
Q9NYZ3	198	GTSE1	Q9NYZ3_198	GTSE1_HUMAN G2 and S phase-expressed protein 1 OS=Homo sapiens OX=9606 GN=GTSE1 PE=1 SV=3	ESC(BTD[C])TAHAASQAATQR|	1|	0.76|	NA|	0.76	NA	1	1
P61981	112	YWHAG	P61981_112	1433G_HUMAN 14-3-3 protein gamma OS=Homo sapiens OX=9606 GN=YWHAG PE=1 SV=2	|NC(BTD[C])SETQYESK	|2	|0.755	|0.12021	0.755	NA	2	1
Q01469	43	FABP5	Q01469_43	FABP5_HUMAN Fatty acid-binding protein 5 OS=Homo sapiens OX=9606 GN=FABP5 PE=1 SV=3	AKPDC(BTD[C])IITCDGK|AKPDC(BTD[C])IITCDGK	2|2	0.89|0.62	0.0|0.0	0.755	0.19092	4	2
Q9HB71	154	CACYBP	Q9HB71_154	CYBP_HUMAN Calcyclin-binding protein OS=Homo sapiens OX=9606 GN=CACYBP PE=1 SV=2	TDTVLILC(BTD[C])R|	2|	0.755|	0.23335|	0.755	NA	2	1
O43747	539	AP1G1	O43747_539	AP1G1_HUMAN AP-1 complex subunit gamma-1 OS=Homo sapiens OX=9606 GN=AP1G1 PE=1 SV=5	FTC(BTD[C])TVNR|FTC(BTD[C])TVNR	1|2	0.84|0.66	NA|0.0	0.75	0.12728	3	2
P04183	66	TK1	P04183_66	KITH_HUMAN Thymidine kinase, cytosolic OS=Homo sapiens OX=9606 GN=TK1 PE=1 SV=2	|YSSSFC(BTD[C])THDR	|2	|0.75	|0.01414	0.75	NA	2	1
P10155	119	RO60	P10155_119	RO60_HUMAN 60 kDa SS-A/Ro ribonucleoprotein OS=Homo sapiens OX=9606 GN=RO60 PE=1 SV=2	AVSEVC(BTD[C])R|AVSEVC(BTD[C])R	1|1	0.58|0.92	NA|NA	0.75	0.24042	2	2
P22234	281	PAICS	P22234_281	PUR6_HUMAN Multifunctional protein ADE2 OS=Homo sapiens OX=9606 GN=PAICS PE=1 SV=3	VVVLMGSTSDLGHC(BTD[C])EK|VVVLMGSTSDLGHC(BTD[C])EK	3|1	0.76|0.74	0.19425|NA	0.75	0.01414	4	2
Q13155	168	AIMP2	Q13155_168	AIMP2_HUMAN Aminoacyl tRNA synthase complex-interacting multifunctional protein 2 OS=Homo sapiens OX=9606 GN=AIMP2 PE=1 SV=2	C(BTD[C])FGEQNKK|	1|	0.75|	NA|	0.75	NA	1	1
Q15008	112	PSMD6	Q15008_112	PSMD6_HUMAN 26S proteasome non-ATPase regulatory subunit 6 OS=Homo sapiens OX=9606 GN=PSMD6 PE=1 SV=1	|AEYLC(BTD[C])R	|1	|0.75	|NA	0.75	NA	1	1
Q56VL3	106	OCIAD2	Q56VL3_106	OCAD2_HUMAN OCIA domain-containing protein 2 OS=Homo sapiens OX=9606 GN=OCIAD2 PE=1 SV=1	VSYIGVC(BTD[C])QSK|	1|	0.75|	NA|	0.75	NA	1	1
Q7L2H7	207	EIF3M	Q7L2H7_207	EIF3M_HUMAN Eukaryotic translation initiation factor 3 subunit M OS=Homo sapiens OX=9606 GN=EIF3M PE=1 SV=1	|VDAHRC(BTD[C])IVR	|1	|0.75	|NA	0.75	NA	1	1
Q9BXJ9	309	NAA15	Q9BXJ9_309	NAA15_HUMAN N-alpha-acetyltransferase 15, NatA auxiliary subunit OS=Homo sapiens OX=9606 GN=NAA15 PE=1 SV=1	FKEC(BTD[C])LDK|FKEC(BTD[C])LDK	1|1	0.85|0.65	NA|NA	0.75	0.14142	2	2
P47756	206	CAPZB	P47756_206	CAPZB_HUMAN F-actin-capping protein subunit beta OS=Homo sapiens OX=9606 GN=CAPZB PE=1 SV=4	QMEKDETVSDC(BTD[C])SPHIANIGR|QMEKDETVSDC(BTD[C])SPHIANIGR	1|1	0.54|0.95	NA|NA	0.745	0.28991	2	2
P48509	185	CD151	P48509_185	CD151_HUMAN CD151 antigen OS=Homo sapiens OX=9606 GN=CD151 PE=1 SV=3	VVPDSCC(BTD[C])K|VVPDSCC(BTD[C])K	2|1	0.65|0.84	0.0|NA	0.745	0.13435	3	2
P62937	62	PPIA	P62937_62	PPIA_HUMAN Peptidyl-prolyl cis-trans isomerase A OS=Homo sapiens OX=9606 GN=PPIA PE=1 SV=2	IIPGFMC(BTD[C])QGGDFTR|IIPGFMC(BTD[C])QGGDFTR	2|1	0.72|0.77	0.0|NA	0.745	0.03536	3	2
O00571	223	DDX3X	O00571_223	DDX3X_HUMAN ATP-dependent RNA helicase DDX3X OS=Homo sapiens OX=9606 GN=DDX3X PE=1 SV=3	|RDLMAC(BTD[C])AQTGSGK DLMAC(BTD[C])AQTGSGK	|3	|0.74	|0.19088	0.74	NA	3	1
O94979	60	SEC31A	O94979_60	SC31A_HUMAN Protein transport protein Sec31A OS=Homo sapiens OX=9606 GN=SEC31A PE=1 SV=3	SC(BTD[C])ATFSSSHR|SC(BTD[C])ATFSSSHR	2|2	0.8|0.68	0.04243|0.0	0.74	0.08485	4	2
P07237	343	P4HB	P07237_343	PDIA1_HUMAN Protein disulfide-isomerase OS=Homo sapiens OX=9606 GN=P4HB PE=1 SV=3	ITEFC(BTD[C])HR|ITEFC(BTD[C])HR	3|4	0.75|0.73	0.04583|0.03775	0.74	0.01414	7	2
P10768	11	ESD	P10768_11	ESTD_HUMAN S-formylglutathione hydrolase OS=Homo sapiens OX=9606 GN=ESD PE=1 SV=2	C(BTD[C])FGGLQK|	1|	0.74|	NA|	0.74	NA	1	1
P13489	38	RNH1	P13489_38	RINI_HUMAN Ribonuclease inhibitor OS=Homo sapiens OX=9606 GN=RNH1 PE=1 SV=2	LDDC(BTD[C])GLTEAR|	1|	0.74|	NA|	0.74	NA	1	1
P21796	232	VDAC1	P21796_232	VDAC1_HUMAN Voltage-dependent anion-selective channel protein 1 OS=Homo sapiens OX=9606 GN=VDAC1 PE=1 SV=2	YQIDPDAC(BTD[C])FSAK|	1|	0.74|	NA|	0.74	NA	1	1
P25942	125	CD40	P25942_125	TNR5_HUMAN Tumor necrosis factor receptor superfamily member 5 OS=Homo sapiens OX=9606 GN=CD40 PE=1 SV=1	SC(BTD[C])SPGFGVK|	1|	0.74|	NA|	0.74	NA	1	1
P40926	212	MDH2	P40926_212	MDHM_HUMAN Malate dehydrogenase, mitochondrial OS=Homo sapiens OX=9606 GN=MDH2 PE=1 SV=3	TIIPLISQC(BTD[C])TPK|TIIPLISQC(BTD[C])TPK	2|2	0.88|0.6	0.0|0.0	0.74	0.19799	4	2
Q13404	71	UBE2V1	Q13404_71	UB2V1_HUMAN Ubiquitin-conjugating enzyme E2 variant 1 OS=Homo sapiens OX=9606 GN=UBE2V1 PE=1 SV=2	IEC(BTD[C])GPK|	2|	0.74|	0.31113|	0.74	NA	2	1
Q16643	96	DBN1	Q16643_96	DREB_HUMAN Drebrin OS=Homo sapiens OX=9606 GN=DBN1 PE=1 SV=4	|KC(BTD[C])ACASHVAK	|1	|0.74	|NA	0.74	NA	1	1
Q8NCA5	292	FAM98A	Q8NCA5_292	FA98A_HUMAN Protein FAM98A OS=Homo sapiens OX=9606 GN=FAM98A PE=1 SV=2	|TAC(BTD[C])AINK	|2	|0.74	|0.0	0.74	NA	2	1
P15121	304	AKR1B1	P15121_304	ALDR_HUMAN Aldo-keto reductase family 1 member B1 OS=Homo sapiens OX=9606 GN=AKR1B1 PE=1 SV=3	VCALLSC(BTD[C])TSHK|VCALLSC(BTD[C])TSHK	1|1	0.74|0.73	NA|NA	0.735	0.00707	2	2
O95782	492	AP2A1	O95782_492	AP2A1_HUMAN AP-2 complex subunit alpha-1 OS=Homo sapiens OX=9606 GN=AP2A1 PE=1 SV=3	TVFEALQAPAC(BTD[C])HENMVK|TVFEALQAPAC(BTD[C])HENMVK	1|1	0.88|0.58	NA|NA	0.73	0.21213	2	2
P13796	42	LCP1	P13796_42	PLSL_HUMAN Plastin-2 OS=Homo sapiens OX=9606 GN=LCP1 PE=1 SV=6	AAC(BTD[C])LPLPGYR|AAC(BTD[C])LPLPGYR	3|1	0.64|0.82	0.0866|NA	0.73	0.12728	4	2
P15121	299	AKR1B1	P15121_299	ALDR_HUMAN Aldo-keto reductase family 1 member B1 OS=Homo sapiens OX=9606 GN=AKR1B1 PE=1 SV=3	VC(BTD[C])ALLSCTSHK|VC(BTD[C])ALLSCTSHK	1|2	0.65|0.81	NA|0.04243	0.73	0.11314	3	2
P35221	772	CTNNA1	P35221_772	CTNA1_HUMAN Catenin alpha-1 OS=Homo sapiens OX=9606 GN=CTNNA1 PE=1 SV=1	TIADHCPDSAC(BTD[C])K|	1|	0.73|	NA|	0.73	NA	1	1
P52789	438	HK2	P52789_438	HXK2_HUMAN Hexokinase-2 OS=Homo sapiens OX=9606 GN=HK2 PE=1 SV=2	LVPGC(BTD[C])DVR|LVPGC(BTD[C])DVR	1|1	0.68|0.78	NA|NA	0.73	0.07071	2	2
P61313	110	RPL15	P61313_110	RL15_HUMAN 60S ribosomal protein L15 OS=Homo sapiens OX=9606 GN=RPL15 PE=1 SV=2	HC(BTD[C])GALR|HC(BTD[C])GALR	1|3	0.8|0.66	NA|0.00577	0.73	0.09899	4	2
Q6NXE6	471	ARMC6	Q6NXE6_471	ARMC6_HUMAN Armadillo repeat-containing protein 6 OS=Homo sapiens OX=9606 GN=ARMC6 PE=1 SV=2	SAHRDC(BTD[C])EDVAK|	2|	0.73|	0.0|	0.73	NA	2	1
Q9Y678	813	COPG1	Q9Y678_813	COPG1_HUMAN Coatomer subunit gamma-1 OS=Homo sapiens OX=9606 GN=COPG1 PE=1 SV=1	FLGMHPC(BTD[C])ER|	3|	0.73|	0.0|	0.73	NA	3	1
P18206	313	VCL	P18206_313	VINC_HUMAN Vinculin OS=Homo sapiens OX=9606 GN=VCL PE=1 SV=4	VGELC(BTD[C])AGK|	2|	0.725|	0.44548|	0.725	NA	2	1
Q7LBC6	1357	KDM3B	Q7LBC6_1357	KDM3B_HUMAN Lysine-specific demethylase 3B OS=Homo sapiens OX=9606 GN=KDM3B PE=1 SV=2	RAC(BTD[C])NLTDTQK|	2|	0.725|	0.06364|	0.725	NA	2	1
P13674	528	P4HA1	P13674_528	P4HA1_HUMAN Prolyl 4-hydroxylase subunit alpha-1 OS=Homo sapiens OX=9606 GN=P4HA1 PE=1 SV=2	RPC(BTD[C])TLSELE|	1|	0.72|	NA|	0.72	NA	1	1
P26006	140	ITGA3	P26006_140	ITA3_HUMAN Integrin alpha-3 OS=Homo sapiens OX=9606 GN=ITGA3 PE=1 SV=5	VLVC(BTD[C])AHR|	1|	0.72|	NA|	0.72	NA	1	1
P27708	1455	CAD	P27708_1455	PYR1_HUMAN CAD protein OS=Homo sapiens OX=9606 GN=CAD PE=1 SV=3	VHVDC(BTD[C])MTSQK|VHVDC(BTD[C])MTSQK	3|2	0.59|0.85	0.01155|0.29698	0.72	0.18385	5	2
P48444	94	ARCN1	P48444_94	COPD_HUMAN Coatomer subunit delta OS=Homo sapiens OX=9606 GN=ARCN1 PE=1 SV=1	VIPEYC(BTD[C])R|VIPEYC(BTD[C])R	3|1	0.79|0.65	0.06351|NA	0.72	0.09899	4	2
P83731	36	RPL24	P83731_36	RL24_HUMAN 60S ribosomal protein L24 OS=Homo sapiens OX=9606 GN=RPL24 PE=1 SV=1	C(BTD[C])ESAFLSK|	2|	0.72|	0.0|	0.72	NA	2	1
Q08J23	235	NSUN2	Q08J23_235	NSUN2_HUMAN tRNA (cytosine(34)-C(5))-methyltransferase OS=Homo sapiens OX=9606 GN=NSUN2 PE=1 SV=2	LSSPC(BTD[C])IMVVNHDASSIPR|	1|	0.72|	NA|	0.72	NA	1	1
Q66LE6	404	PPP2R2D	Q66LE6_404	2ABD_HUMAN Serine/threonine-protein phosphatase 2A 55 kDa regulatory subunit B delta isoform OS=Homo sapiens OX=9606 GN=PPP2R2D PE=1 SV=1	KVC(BTD[C])TGGK|	1|	0.72|	NA|	0.72	NA	1	1
Q8IX01	656	SUGP2	Q8IX01_656	SUGP2_HUMAN SURP and G-patch domain-containing protein 2 OS=Homo sapiens OX=9606 GN=SUGP2 PE=1 SV=2	GADQKPTSADC(BTD[C])AVR|	3|	0.72|	0.18037|	0.72	NA	3	1
Q92905	218	COPS5	Q92905_218	CSN5_HUMAN COP9 signalosome complex subunit 5 OS=Homo sapiens OX=9606 GN=COPS5 PE=1 SV=4	IEDFGVHC(BTD[C])K|	1|	0.72|	NA|	0.72	NA	1	1
Q96T51	320	RUFY1	Q96T51_320	RUFY1_HUMAN RUN and FYVE domain-containing protein 1 OS=Homo sapiens OX=9606 GN=RUFY1 PE=1 SV=2	HLSC(BTD[C])TVGDLQTK|	1|	0.72|	NA|	0.72	NA	1	1
Q99460	112	PSMD1	Q99460_112	PSMD1_HUMAN 26S proteasome non-ATPase regulatory subunit 1 OS=Homo sapiens OX=9606 GN=PSMD1 PE=1 SV=2	QC(BTD[C])VENADLPEGEKKPIDQR|	1|	0.72|	NA|	0.72	NA	1	1
Q9BZD4	377	NUF2	Q9BZD4_377	NUF2_HUMAN Kinetochore protein Nuf2 OS=Homo sapiens OX=9606 GN=NUF2 PE=1 SV=2	|TVIEDC(BTD[C])NKVQEK	|1	|0.72	|NA	0.72	NA	1	1
O00410	180	IPO5	O00410_180	IPO5_HUMAN Importin-5 OS=Homo sapiens OX=9606 GN=IPO5 PE=1 SV=4	MLVQC(BTD[C])MQDQEHPSIR|MLVQC(BTD[C])MQDQEHPSIR	3|3	0.76|0.67	0.20599|0.0866	0.715	0.06364	6	2
P09382	43	LGALS1	P09382_43	LEG1_HUMAN Galectin-1 OS=Homo sapiens OX=9606 GN=LGALS1 PE=1 SV=2	DSNNLC(BTD[C])LHFNPR|DSNNLC(BTD[C])LHFNPR	6|3	0.68|0.75	0.1563|0.02646	0.715	0.0495	9	2
Q14232	218	EIF2B1	Q14232_218	EI2BA_HUMAN Translation initiation factor eIF-2B subunit alpha OS=Homo sapiens OX=9606 GN=EIF2B1 PE=1 SV=1	IGTNQMAVC(BTD[C])AK|	2|	0.715|	0.36062|	0.715	NA	2	1
Q14315	2679	FLNC	Q14315_2679	FLNC_HUMAN Filamin-C OS=Homo sapiens OX=9606 GN=FLNC PE=1 SV=3	TPC(BTD[C])EEVYVK|TPC(BTD[C])EEVYVK	2|2	0.59|0.84	0.0|0.0	0.715	0.17678	4	2
Q9ULV4	343	CORO1C	Q9ULV4_343	COR1C_HUMAN Coronin-1C OS=Homo sapiens OX=9606 GN=CORO1C PE=1 SV=1	KC(BTD[C])EPIIMTVPR|KC(BTD[C])EPIIMTVPR	5|3	0.75|0.68	0.02191|0.12124	0.715	0.0495	8	2
O95299	67	NDUFA10	O95299_67	NDUAA_HUMAN NADH dehydrogenase [ubiquinone] 1 alpha subcomplex subunit 10, mitochondrial OS=Homo sapiens OX=9606 GN=NDUFA10 PE=1 SV=1	VITVDGNIC(BTD[C])TGK|	1|	0.71|	NA|	0.71	NA	1	1
P11387	341	TOP1	P11387_341	TOP1_HUMAN DNA topoisomerase 1 OS=Homo sapiens OX=9606 GN=TOP1 PE=1 SV=2	|EYGFC(BTD[C])IMDNHK	|1	|0.71	|NA	0.71	NA	1	1
P16152	150	CBR1	P16152_150	CBR1_HUMAN Carbonyl reductase [NADPH] 1 OS=Homo sapiens OX=9606 GN=CBR1 PE=1 SV=3	SC(BTD[C])SPELQQK|SC(BTD[C])SPELQQK	1|2	0.82|0.6	NA|0.0	0.71	0.15556	3	2
P16615	447	ATP2A2	P16615_447	AT2A2_HUMAN Sarcoplasmic/endoplasmic reticulum calcium ATPase 2 OS=Homo sapiens OX=9606 GN=ATP2A2 PE=1 SV=1	VGEATETALTC(BTD[C])LVEK|	1|	0.71|	NA|	0.71	NA	1	1
P17813	30	ENG	P17813_30	EGLN_HUMAN Endoglin OS=Homo sapiens OX=9606 GN=ENG PE=1 SV=2	ETVHC(BTD[C])DLQPVGPER|	1|	0.71|	NA|	0.71	NA	1	1
P21980	371	TGM2	P21980_371	TGM2_HUMAN Protein-glutamine gamma-glutamyltransferase 2 OS=Homo sapiens OX=9606 GN=TGM2 PE=1 SV=2	SEGTYCC(BTD[C])GPVPVR|	2|	0.71|	0.0|	0.71	NA	2	1
P25789	163	PSMA4	P25789_163	PSA4_HUMAN Proteasome subunit alpha type-4 OS=Homo sapiens OX=9606 GN=PSMA4 PE=1 SV=1	ATC(BTD[C])IGNNSAAAVSMLK|ATC(BTD[C])IGNNSAAAVSMLK	2|1	0.81|0.61	0.57983|NA	0.71	0.14142	3	2
P49792	105	RANBP2	P49792_105	RBP2_HUMAN E3 SUMO-protein ligase RanBP2 OS=Homo sapiens OX=9606 GN=RANBP2 PE=1 SV=2	IAEILC(BTD[C])K|	1|	0.71|	NA|	0.71	NA	1	1
P63244	207	RACK1	P63244_207	RACK1_HUMAN Receptor of activated protein C kinase 1 OS=Homo sapiens OX=9606 GN=RACK1 PE=1 SV=3	TNHIGHTGYLNTVTVSPDGSLC(BTD[C])ASGGK|	1|	0.71|	NA|	0.71	NA	1	1
Q15437	180	SEC23B	Q15437_180	SC23B_HUMAN Protein transport protein Sec23B OS=Homo sapiens OX=9606 GN=SEC23B PE=1 SV=2	|MVQVHELSC(BTD[C])EGISK	|1	|0.71	|NA	0.71	NA	1	1
Q5H9R7	467	PPP6R3	Q5H9R7_467	PP6R3_HUMAN Serine/threonine-protein phosphatase 6 regulatory subunit 3 OS=Homo sapiens OX=9606 GN=PPP6R3 PE=1 SV=2	IANC(BTD[C])IVHSTDK|	1|	0.71|	NA|	0.71	NA	1	1
Q99873	250	PRMT1	Q99873_250	ANM1_HUMAN Protein arginine N-methyltransferase 1 OS=Homo sapiens OX=9606 GN=PRMT1 PE=1 SV=3	QLVTNAC(BTD[C])LIK|	1|	0.71|	NA|	0.71	NA	1	1
Q9BVQ7	732	SPATA5L1	Q9BVQ7_732	SPA5L_HUMAN Spermatogenesis-associated protein 5-like protein 1 OS=Homo sapiens OX=9606 GN=SPATA5L1 PE=1 SV=2	|TVKPSLSC(BTD[C])K	|1	|0.71	|NA	0.71	NA	1	1
Q9UGI8	196	TES	Q9UGI8_196	TES_HUMAN Testin OS=Homo sapiens OX=9606 GN=TES PE=1 SV=1	LPC(BTD[C])EMDAQGPK|LPC(BTD[C])EMDAQGPK	1|1	0.59|0.83	NA|NA	0.71	0.16971	2	2
P61224	118	RAP1B	P61224_118	RAP1B_HUMAN Ras-related protein Rap-1b OS=Homo sapiens OX=9606 GN=RAP1B PE=1 SV=1	VKDTDDVPMILVGNKC(BTD[C])DLEDER|VKDTDDVPMILVGNKC(BTD[C])DLEDER	1|1	0.53|0.88	NA|NA	0.705	0.24749	2	2
Q15020	486	SART3	Q15020_486	SART3_HUMAN Squamous cell carcinoma antigen recognized by T-cells 3 OS=Homo sapiens OX=9606 GN=SART3 PE=1 SV=1	LC(BTD[C])NNMQK|LC(BTD[C])NNMQK	1|2	0.89|0.52	NA|0.0	0.705	0.26163	3	2
O94903	261	PLPBP	O94903_261	PLPHP_HUMAN Pyridoxal phosphate homeostasis protein OS=Homo sapiens OX=9606 GN=PLPBP PE=1 SV=1	KPTPDKC(BTD[C])AADVK|KPTPDKC(BTD[C])AADVK	1|2	0.74|0.66	NA|0.0	0.7	0.05657	3	2
P10316	283	HLA-A	P10316_283	1A69_HUMAN HLA class I histocompatibility antigen, A-69 alpha chain OS=Homo sapiens OX=9606 GN=HLA-A PE=1 SV=2	YTC(BTD[C])HVQHEGLPK|	1|	0.7|	NA|	0.7	NA	1	1
Q14139	490	UBE4A	Q14139_490	UBE4A_HUMAN Ubiquitin conjugation factor E4 A OS=Homo sapiens OX=9606 GN=UBE4A PE=1 SV=2	GLDKETC(BTD[C])LIPAVQEPK|	1|	0.7|	NA|	0.7	NA	1	1
Q96FV9	251	THOC1	Q96FV9_251	THOC1_HUMAN THO complex subunit 1 OS=Homo sapiens OX=9606 GN=THOC1 PE=1 SV=1	|NPVQC(BTD[C])YEK	|1	|0.7	|NA	0.7	NA	1	1
Q99470	26	SDF2	Q99470_26	SDF2_HUMAN Stromal cell-derived factor 2 OS=Homo sapiens OX=9606 GN=SDF2 PE=1 SV=2	SSLGVVTC(BTD[C])GSVVK|	1|	0.7|	NA|	0.7	NA	1	1
Q9UKX7	151	NUP50	Q9UKX7_151	NUP50_HUMAN Nuclear pore complex protein Nup50 OS=Homo sapiens OX=9606 GN=NUP50 PE=1 SV=2	|AC(BTD[C])VGNAYHK	|3	|0.7	|0.00577	0.7	NA	3	1
Q9ULA0	413	DNPEP	Q9ULA0_413	DNPEP_HUMAN Aspartyl aminopeptidase OS=Homo sapiens OX=9606 GN=DNPEP PE=1 SV=1	NDTPC(BTD[C])GTTIGPILASR|	1|	0.7|	NA|	0.7	NA	1	1
P49589	525	CARS	P49589_525	SYCC_HUMAN Cysteine--tRNA ligase, cytoplasmic OS=Homo sapiens OX=9606 GN=CARS PE=1 SV=3	ALVSQC(BTD[C])NLYMAAR|ALVSQC(BTD[C])NLYMAAR	2|1	0.775|0.62	0.20506|NA	0.6975	0.1096	3	2
P27348	134	YWHAQ	P27348_134	1433T_HUMAN 14-3-3 protein theta OS=Homo sapiens OX=9606 GN=YWHAQ PE=1 SV=1	YLAEVAC(BTD[C])GDDRK|YLAEVAC(BTD[C])GDDRK	4|4	0.56|0.83	0.0755|0.2685	0.695	0.19092	8	2
Q14315	2660	FLNC	Q14315_2660	FLNC_HUMAN Filamin-C OS=Homo sapiens OX=9606 GN=FLNC PE=1 SV=3	NSFTVDC(BTD[C])SK|	2|	0.695|	0.00707|	0.695	NA	2	1
O75369	2333	FLNB	O75369_2333	FLNB_HUMAN Filamin-B OS=Homo sapiens OX=9606 GN=FLNB PE=1 SV=2	VHSPSGAVEEC(BTD[C])HVSELEPDK|VHSPSGAVEEC(BTD[C])HVSELEPDK	2|3	0.645|0.74	0.00707|0.05196	0.6925	0.06718	5	2
P08651	88	NFIC	P08651_88	NFIC_HUMAN Nuclear factor 1 C-type OS=Homo sapiens OX=9606 GN=NFIC PE=1 SV=2	DIRPEC(BTD[C])R|	1|	0.69|	NA|	0.69	NA	1	1
P22314	444	UBA1	P22314_444	UBA1_HUMAN Ubiquitin-like modifier-activating enzyme 1 OS=Homo sapiens OX=9606 GN=UBA1 PE=1 SV=3	EVLTEDKC(BTD[C])LQR|	1|	0.69|	NA|	0.69	NA	1	1
P39023	114	RPL3	P39023_114	RL3_HUMAN 60S ribosomal protein L3 OS=Homo sapiens OX=9606 GN=RPL3 PE=1 SV=2	TVFAEHISDEC(BTD[C])K|TVFAEHISDEC(BTD[C])K	1|2	0.76|0.62	NA|0.0	0.69	0.09899	3	2
P50213	331	IDH3A	P50213_331	IDH3A_HUMAN Isocitrate dehydrogenase [NAD] subunit alpha, mitochondrial OS=Homo sapiens OX=9606 GN=IDH3A PE=1 SV=1	IEAAC(BTD[C])FATIK|	1|	0.69|	NA|	0.69	NA	1	1
P60866	36	RPS20	P60866_36	RS20_HUMAN 40S ribosomal protein S20 OS=Homo sapiens OX=9606 GN=RPS20 PE=1 SV=1	|VC(BTD[C])ADLIR	|3	|0.69	|0.0	0.69	NA	3	1
Q14318	295	FKBP8	Q14318_295	FKBP8_HUMAN Peptidyl-prolyl cis-trans isomerase FKBP8 OS=Homo sapiens OX=9606 GN=FKBP8 PE=1 SV=2	|SC(BTD[C])SLVLEHQPDNIK	|1	|0.69	|NA	0.69	NA	1	1
Q99615	317	DNAJC7	Q99615_317	DNJC7_HUMAN DnaJ homolog subfamily C member 7 OS=Homo sapiens OX=9606 GN=DNAJC7 PE=1 SV=2	KLDDAIEDC(BTD[C])TNAVK|	1|	0.69|	NA|	0.69	NA	1	1
Q9H0A0	746	NAT10	Q9H0A0_746	NAT10_HUMAN RNA cytidine acetyltransferase OS=Homo sapiens OX=9606 GN=NAT10 PE=1 SV=2	QTPNDLTGEHSC(BTD[C])IMLK|	1|	0.69|	NA|	0.69	NA	1	1
Q9NVN8	322	GNL3L	Q9NVN8_322	GNL3L_HUMAN Guanine nucleotide-binding protein-like 3-like protein OS=Homo sapiens OX=9606 GN=GNL3L PE=1 SV=1	NC(BTD[C])VHVQK|	1|	0.69|	NA|	0.69	NA	1	1
Q15393	547	SF3B3	Q15393_547	SF3B3_HUMAN Splicing factor 3B subunit 3 OS=Homo sapiens OX=9606 GN=SF3B3 PE=1 SV=4	TIVKC(BTD[C])AVNQR|TIVKC(BTD[C])AVNQR	1|2	0.86|0.51	NA|0.18385	0.685	0.24749	3	2
Q96S97	279	MYADM	Q96S97_279	MYADM_HUMAN Myeloid-associated differentiation marker OS=Homo sapiens OX=9606 GN=MYADM PE=1 SV=2	DVSC(BTD[C])SR|DVSC(BTD[C])SR	1|2	0.63|0.74	NA|0.0	0.685	0.07778	3	2
O15067	270	PFAS	O15067_270	PUR4_HUMAN Phosphoribosylformylglycinamidine synthase OS=Homo sapiens OX=9606 GN=PFAS PE=1 SV=4	FC(BTD[C])DNSSAIQGK|	2|	0.68|	0.0|	0.68	NA	2	1
P15880	188	RPS2	P15880_188	RS2_HUMAN 40S ribosomal protein S2 OS=Homo sapiens OX=9606 GN=RPS2 PE=1 SV=2	C(BTD[C])GSVLVR|	1|	0.68|	NA|	0.68	NA	1	1
P34932	779	HSPA4	P34932_779	HSP74_HUMAN Heat shock 70 kDa protein 4 OS=Homo sapiens OX=9606 GN=HSPA4 PE=1 SV=4	ELTSTC(BTD[C])SPIISKPK ELTSTC(BTD[C])SPIISK|ELTSTC(BTD[C])SPIISK	3|1	0.72|0.64	0.05508|NA	0.68	0.05657	4	2
P46087	487	NOP2	P46087_487	NOP2_HUMAN Probable 28S rRNA (cytosine(4447)-C(5))-methyltransferase OS=Homo sapiens OX=9606 GN=NOP2 PE=1 SV=2	C(BTD[C])AHLQK|	1|	0.68|	NA|	0.68	NA	1	1
P48643	377	CCT5	P48643_377	TCPE_HUMAN T-complex protein 1 subunit epsilon OS=Homo sapiens OX=9606 GN=CCT5 PE=1 SV=1	MLVIEQC(BTD[C])K|	2|	0.68|	0.0|	0.68	NA	2	1
P49327	1759	FASN	P49327_1759	FAS_HUMAN Fatty acid synthase OS=Homo sapiens OX=9606 GN=FASN PE=1 SV=3	C(BTD[C])LATHGR|	2|	0.68|	0.0|	0.68	NA	2	1
P49721	91	PSMB2	P49721_91	PSB2_HUMAN Proteasome subunit beta type-2 OS=Homo sapiens OX=9606 GN=PSMB2 PE=1 SV=1	|RNLADC(BTD[C])LR	|1	|0.68	|NA	0.68	NA	1	1
P50395	202	GDI2	P50395_202	GDIB_HUMAN Rab GDP dissociation inhibitor beta OS=Homo sapiens OX=9606 GN=GDI2 PE=1 SV=2	TDDYLDQPC(BTD[C])YETINR|	1|	0.68|	NA|	0.68	NA	1	1
P62873	204	GNB1	P62873_204	GBB1_HUMAN Guanine nucleotide-binding protein G(I)/G(S)/G(T) subunit beta-1 OS=Homo sapiens OX=9606 GN=GNB1 PE=1 SV=3	LFVSGAC(BTD[C])DASAK|LFVSGAC(BTD[C])DASAK	3|2	0.81|0.55	0.15567|0.12728	0.68	0.18385	5	2
Q8TAT6	355	NPLOC4	Q8TAT6_355	NPL4_HUMAN Nuclear protein localization protein 4 homolog OS=Homo sapiens OX=9606 GN=NPLOC4 PE=1 SV=3	|HPNMC(BTD[C])R	|1	|0.68	|NA	0.68	NA	1	1
Q969P6	569	TOP1MT	Q969P6_569	TOP1M_HUMAN DNA topoisomerase I, mitochondrial OS=Homo sapiens OX=9606 GN=TOP1MT PE=1 SV=1	ISIAWC(BTD[C])K|	1|	0.68|	NA|	0.68	NA	1	1
Q96F07	179	CYFIP2	Q96F07_179	CYFP2_HUMAN Cytoplasmic FMR1-interacting protein 2 OS=Homo sapiens OX=9606 GN=CYFIP2 PE=1 SV=2	|NMKC(BTD[C])SVK	|1	|0.68	|NA	0.68	NA	1	1
Q9BTW9	826	TBCD	Q9BTW9_826	TBCD_HUMAN Tubulin-specific chaperone D OS=Homo sapiens OX=9606 GN=TBCD PE=1 SV=2	|IC(BTD[C])QTVGVK	|1	|0.68	|NA	0.68	NA	1	1
Q9NWH9	311	SLTM	Q9NWH9_311	SLTM_HUMAN SAFB-like transcription modulator OS=Homo sapiens OX=9606 GN=SLTM PE=1 SV=2	|KEDC(BTD[C])VK	|1	|0.68	|NA	0.68	NA	1	1
Q9Y3T9	567	NOC2L	Q9Y3T9_567	NOC2L_HUMAN Nucleolar complex protein 2 homolog OS=Homo sapiens OX=9606 GN=NOC2L PE=1 SV=4	|VANYC(BTD[C])R	|1	|0.68	|NA	0.68	NA	1	1
Q92598	796	HSPH1	Q92598_796	HS105_HUMAN Heat shock protein 105 kDa OS=Homo sapiens OX=9606 GN=HSPH1 PE=1 SV=1	ELNNTC(BTD[C])EPVVTQPKPK ELNNTC(BTD[C])EPVVTQPK|IKELNNTC(BTD[C])EPVVTQPKPK ELNNTC(BTD[C])EPVVTQPKPK IKELNNTC(BTD[C])EPVVTQPK ELNNTC(BTD[C])EPVVTQPK	3|4	0.55|0.805	0.10693|0.25513	0.6775	0.18031	7	2
O75533	1035	SF3B1	O75533_1035	SF3B1_HUMAN Splicing factor 3B subunit 1 OS=Homo sapiens OX=9606 GN=SF3B1 PE=1 SV=3	VQENC(BTD[C])IDLVGR|VQENC(BTD[C])IDLVGR	1|1	0.71|0.64	NA|NA	0.675	0.0495	2	2
P10606	116	COX5B	P10606_116	COX5B_HUMAN Cytochrome c oxidase subunit 5B, mitochondrial OS=Homo sapiens OX=9606 GN=COX5B PE=1 SV=2	C(BTD[C])GAHYK|C(BTD[C])GAHYK	1|1	0.57|0.78	NA|NA	0.675	0.14849	2	2
P35613	242	BSG	P35613_242	BASI_HUMAN Basigin OS=Homo sapiens OX=9606 GN=BSG PE=1 SV=2	SSEHINEGETAMLVC(BTD[C])K|SSEHINEGETAMLVC(BTD[C])K	2|1	0.63|0.72	0.0|NA	0.675	0.06364	3	2
P52788	337	SMS	P52788_337	SPSY_HUMAN Spermine synthase OS=Homo sapiens OX=9606 GN=SMS PE=1 SV=2	LYC(BTD[C])PVEFSK|LYC(BTD[C])PVEFSK	3|2	0.6|0.75	0.02887|0.0	0.675	0.10607	5	2
Q9Y399	162	MRPS2	Q9Y399_162	RT02_HUMAN 28S ribosomal protein S2, mitochondrial OS=Homo sapiens OX=9606 GN=MRPS2 PE=1 SV=1	|DC(BTD[C])GEYAHTR	|2	|0.675	|0.23335	0.675	NA	2	1
P09651	175	HNRNPA1	P09651_175	ROA1_HUMAN Heterogeneous nuclear ribonucleoprotein A1 OS=Homo sapiens OX=9606 GN=HNRNPA1 PE=1 SV=5	YHTVNGHNC(BTD[C])EVR|YHTVNGHNC(BTD[C])EVRK YHTVNGHNC(BTD[C])EVR	2|4	0.68|0.665	0.0|0.21917	0.6725	0.01061	6	2
O60684	253	KPNA6	O60684_253	IMA7_HUMAN Importin subunit alpha-7 OS=Homo sapiens OX=9606 GN=KPNA6 PE=1 SV=1	|VSPC(BTD[C])LPVLSR	|1	|0.67	|NA	0.67	NA	1	1
O75369	660	FLNB	O75369_660	FLNB_HUMAN Filamin-B OS=Homo sapiens OX=9606 GN=FLNB PE=1 SV=2	SGC(BTD[C])IVNNLAEFTVDPK|	1|	0.67|	NA|	0.67	NA	1	1
P04040	460	CAT	P04040_460	CATA_HUMAN Catalase OS=Homo sapiens OX=9606 GN=CAT PE=1 SV=3	RLC(BTD[C])ENIAGHLK LC(BTD[C])ENIAGHLK|RLC(BTD[C])ENIAGHLK LC(BTD[C])ENIAGHLK	3|6	0.71|0.63	0.11269|0.07731	0.67	0.05657	9	2
P05388	27	RPLP0	P05388_27	RLA0_HUMAN 60S acidic ribosomal protein P0 OS=Homo sapiens OX=9606 GN=RPLP0 PE=1 SV=1	C(BTD[C])FIVGADNVGSK|	3|	0.67|	0.02309|	0.67	NA	3	1
P35579	740	MYH9	P35579_740	MYH9_HUMAN Myosin-9 OS=Homo sapiens OX=9606 GN=MYH9 PE=1 SV=4	QAC(BTD[C])VLMIK|QAC(BTD[C])VLMIK	2|1	0.81|0.53	0.0|NA	0.67	0.19799	3	2
P50395	302	GDI2	P50395_302	GDIB_HUMAN Rab GDP dissociation inhibitor beta OS=Homo sapiens OX=9606 GN=GDI2 PE=1 SV=2	|VIC(BTD[C])ILSHPIK	|2	|0.67	|0.0	0.67	NA	2	1
P52306	350	RAP1GDS1	P52306_350	GDS1_HUMAN Rap1 GTPase-GDP dissociation stimulator 1 OS=Homo sapiens OX=9606 GN=RAP1GDS1 PE=1 SV=3	NDANC(BTD[C])IHMVDNGIVEK|	2|	0.67|	0.0|	0.67	NA	2	1
P52907	124	CAPZA1	P52907_124	CAZA1_HUMAN F-actin-capping protein subunit alpha-1 OS=Homo sapiens OX=9606 GN=CAPZA1 PE=1 SV=3	ESC(BTD[C])DSALR|	2|	0.67|	0.0|	0.67	NA	2	1
P61978	145	HNRNPK	P61978_145	HNRPK_HUMAN Heterogeneous nuclear ribonucleoprotein K OS=Homo sapiens OX=9606 GN=HNRNPK PE=1 SV=1	GSDFDC(BTD[C])ELR|	1|	0.67|	NA|	0.67	NA	1	1
Q00610	459	CLTC	Q00610_459	CLH1_HUMAN Clathrin heavy chain 1 OS=Homo sapiens OX=9606 GN=CLTC PE=1 SV=5	EDKLEC(BTD[C])SEELGDLVK|	1|	0.67|	NA|	0.67	NA	1	1
Q07812	62	BAX	Q07812_62	BAX_HUMAN Apoptosis regulator BAX OS=Homo sapiens OX=9606 GN=BAX PE=1 SV=1	LSEC(BTD[C])LKR|	2|	0.67|	0.0|	0.67	NA	2	1
Q12765	324	SCRN1	Q12765_324	SCRN1_HUMAN Secernin-1 OS=Homo sapiens OX=9606 GN=SCRN1 PE=1 SV=2	TQSPC(BTD[C])FGDDDPAKKEPR TQSPC(BTD[C])FGDDDPAKK|	3|	0.67|	0.1097|	0.67	NA	3	1
Q15436	180	SEC23A	Q15436_180	SC23A_HUMAN Protein transport protein Sec23A OS=Homo sapiens OX=9606 GN=SEC23A PE=1 SV=2	MVQVHELGC(BTD[C])EGISK|	1|	0.67|	NA|	0.67	NA	1	1
Q9UN86	73	G3BP2	Q9UN86_73	G3BP2_HUMAN Ras GTPase-activating protein-binding protein 2 OS=Homo sapiens OX=9606 GN=G3BP2 PE=1 SV=2	VLSLNFSEC(BTD[C])HTK|	1|	0.67|	NA|	0.67	NA	1	1
Q9Y263	193	PLAA	Q9Y263_193	PLAP_HUMAN Phospholipase A-2-activating protein OS=Homo sapiens OX=9606 GN=PLAA PE=1 SV=2	|TFSGHEDC(BTD[C])VR	|1	|0.67	|NA	0.67	NA	1	1
P04406	156	GAPDH	P04406_156	G3P_HUMAN Glyceraldehyde-3-phosphate dehydrogenase OS=Homo sapiens OX=9606 GN=GAPDH PE=1 SV=3	IISNASCTTNC(BTD[C])LAPLAK|IISNASCTTNC(BTD[C])LAPLAK	1|2	0.69|0.645	NA|0.00707	0.6675	0.03182	3	2
P48643	493	CCT5	P48643_493	TCPE_HUMAN T-complex protein 1 subunit epsilon OS=Homo sapiens OX=9606 GN=CCT5 PE=1 SV=1	EMNPALGIDC(BTD[C])LHK|EMNPALGIDC(BTD[C])LHK	8|3	0.665|0.67	0.07009|0.03215	0.6675	0.00354	11	2
P30101	85	PDIA3	P30101_85	PDIA3_HUMAN Protein disulfide-isomerase A3 OS=Homo sapiens OX=9606 GN=PDIA3 PE=1 SV=4	VDC(BTD[C])TANTNTCNK|VDC(BTD[C])TANTNTCNK	1|5	0.85|0.48	NA|0.17213	0.665	0.26163	6	2
P40925	154	MDH1	P40925_154	MDHC_HUMAN Malate dehydrogenase, cytoplasmic OS=Homo sapiens OX=9606 GN=MDH1 PE=1 SV=4	ENFSC(BTD[C])LTR|ENFSC(BTD[C])LTR	1|2	0.7|0.63	NA|0.0	0.665	0.0495	3	2
P62280	60	RPS11	P62280_60	RS11_HUMAN 40S ribosomal protein S11 OS=Homo sapiens OX=9606 GN=RPS11 PE=1 SV=3	KC(BTD[C])PFTGNVSIR C(BTD[C])PFTGNVSIR|KC(BTD[C])PFTGNVSIR C(BTD[C])PFTGNVSIR	3|5	0.75|0.58	0.20502|0.18488	0.665	0.12021	8	2
P62633	158	CNBP	P62633_158	CNBP_HUMAN Cellular nucleic acid-binding protein OS=Homo sapiens OX=9606 GN=CNBP PE=1 SV=1	TSEVNC(BTD[C])YR|TSEVNC(BTD[C])YR	2|2	0.565|0.76	0.02121|0.0	0.6625	0.13789	4	2
P16615	498	ATP2A2	P16615_498	AT2A2_HUMAN Sarcoplasmic/endoplasmic reticulum calcium ATPase 2 OS=Homo sapiens OX=9606 GN=ATP2A2 PE=1 SV=1	|SMSVYC(BTD[C])TPNKPSR	|1	|0.66	|NA	0.66	NA	1	1
P17987	385	TCP1	P17987_385	TCPA_HUMAN T-complex protein 1 subunit alpha OS=Homo sapiens OX=9606 GN=TCP1 PE=1 SV=1	GANDFMC(BTD[C])DEMER|	1|	0.66|	NA|	0.66	NA	1	1
P21333	2601	FLNA	P21333_2601	FLNA_HUMAN Filamin-A OS=Homo sapiens OX=9606 GN=FLNA PE=1 SV=4	TPC(BTD[C])EEILVK|TPC(BTD[C])EEILVK	2|3	0.62|0.7	0.0|0.12166	0.66	0.05657	5	2
P33176	858	KIF5B	P33176_858	KINH_HUMAN Kinesin-1 heavy chain OS=Homo sapiens OX=9606 GN=KIF5B PE=1 SV=1	DNADLRC(BTD[C])ELPK|DNADLRC(BTD[C])ELPK	1|1	0.58|0.74	NA|NA	0.66	0.11314	2	2
P50395	282	GDI2	P50395_282	GDIB_HUMAN Rab GDP dissociation inhibitor beta OS=Homo sapiens OX=9606 GN=GDI2 PE=1 SV=2	QLIC(BTD[C])DPSYVK|	1|	0.66|	NA|	0.66	NA	1	1
P55884	515	EIF3B	P55884_515	EIF3B_HUMAN Eukaryotic translation initiation factor 3 subunit B OS=Homo sapiens OX=9606 GN=EIF3B PE=1 SV=3	NLFNVVDC(BTD[C])K|	2|	0.66|	0.0|	0.66	NA	2	1
Q14247	112	CTTN	Q14247_112	SRC8_HUMAN Src substrate cortactin OS=Homo sapiens OX=9606 GN=CTTN PE=1 SV=2	HC(BTD[C])SQVDSVR|HC(BTD[C])SQVDSVR	4|2	0.815|0.505	0.26571|0.00707	0.66	0.2192	6	2
Q86WR0	83	CCDC25	Q86WR0_83	CCD25_HUMAN Coiled-coil domain-containing protein 25 OS=Homo sapiens OX=9606 GN=CCDC25 PE=1 SV=2	ANSIQGC(BTD[C])K|ANSIQGC(BTD[C])K	1|1	0.54|0.78	NA|NA	0.66	0.16971	2	2
Q92598	658	HSPH1	Q92598_658	HS105_HUMAN Heat shock protein 105 kDa OS=Homo sapiens OX=9606 GN=HSPH1 PE=1 SV=1	|FIC(BTD[C])EQDHQNFLR	|2	|0.66	|0.0	0.66	NA	2	1
P34897	241	SHMT2	P34897_241	GLYM_HUMAN Serine hydroxymethyltransferase, mitochondrial OS=Homo sapiens OX=9606 GN=SHMT2 PE=1 SV=3	MREVC(BTD[C])DEVK|MREVC(BTD[C])DEVK	2|5	0.65|0.66	0.0|0.22219	0.655	0.00707	7	2
Q9NQC3	1101	RTN4	Q9NQC3_1101	RTN4_HUMAN Reticulon-4 OS=Homo sapiens OX=9606 GN=RTN4 PE=1 SV=2	YSNSALGHVNC(BTD[C])TIK|YSNSALGHVNC(BTD[C])TIK	3|4	0.6|0.71	0.12124|0.05774	0.655	0.07778	7	2
P26006	904	ITGA3	P26006_904	ITA3_HUMAN Integrin alpha-3 OS=Homo sapiens OX=9606 GN=ITGA3 PE=1 SV=5	SETVLTC(BTD[C])ATGR|SETVLTC(BTD[C])ATGR	4|1	0.635|0.67	0.1097|NA	0.6525	0.02475	5	2
Q9Y315	182	DERA	Q9Y315_182	DEOC_HUMAN Deoxyribose-phosphate aldolase OS=Homo sapiens OX=9606 GN=DERA PE=1 SV=2	KAC(BTD[C])GEAHLK AC(BTD[C])GEAHLK|KAC(BTD[C])GEAHLK AC(BTD[C])GEAHLK	2|2	0.775|0.53	0.13435|0.05657	0.6525	0.17324	4	2
O43747	160	AP1G1	O43747_160	AP1G1_HUMAN AP-1 complex subunit gamma-1 OS=Homo sapiens OX=9606 GN=AP1G1 PE=1 SV=5	|AALC(BTD[C])AVHVIR	|1	|0.65	|NA	0.65	NA	1	1
O75891	707	ALDH1L1	O75891_707	AL1L1_HUMAN Cytosolic 10-formyltetrahydrofolate dehydrogenase OS=Homo sapiens OX=9606 GN=ALDH1L1 PE=1 SV=2	|GENC(BTD[C])IAAGR	|1	|0.65	|NA	0.65	NA	1	1
P06733	357	ENO1	P06733_357	ENOA_HUMAN Alpha-enolase OS=Homo sapiens OX=9606 GN=ENO1 PE=1 SV=2	VNQIGSVTESIQAC(BTD[C])K|	2|	0.65|	0.0|	0.65	NA	2	1
P11142	17	HSPA8	P11142_17	HSP7C_HUMAN Heat shock cognate 71 kDa protein OS=Homo sapiens OX=9606 GN=HSPA8 PE=1 SV=1	SC(BTD[C])VGVFQHGK C(BTD[C])VGVFQHGK|	4|	0.65|	0.10893|	0.65	NA	4	1
P13796	164	LCP1	P13796_164	PLSL_HUMAN Plastin-2 OS=Homo sapiens OX=9606 GN=LCP1 PE=1 SV=6	AVGDGIVLC(BTD[C])K|AVGDGIVLC(BTD[C])K	2|1	0.74|0.56	0.0|NA	0.65	0.12728	3	2
P14866	472	HNRNPL	P14866_472	HNRPL_HUMAN Heterogeneous nuclear ribonucleoprotein L OS=Homo sapiens OX=9606 GN=HNRNPL PE=1 SV=2	QPAIMPGQSYGLEDGSC(BTD[C])SYK|	1|	0.65|	NA|	0.65	NA	1	1
P18077	47	RPL35A	P18077_47	RL35A_HUMAN 60S ribosomal protein L35a OS=Homo sapiens OX=9606 GN=RPL35A PE=1 SV=2	C(BTD[C])AYVYK|	1|	0.65|	NA|	0.65	NA	1	1
P52788	237	SMS	P52788_237	SPSY_HUMAN Spermine synthase OS=Homo sapiens OX=9606 GN=SMS PE=1 SV=2	|KTC(BTD[C])GDVLDNLK	|1	|0.65	|NA	0.65	NA	1	1
P53621	673	COPA	P53621_673	COPA_HUMAN Coatomer subunit alpha OS=Homo sapiens OX=9606 GN=COPA PE=1 SV=2	ALDDKNC(BTD[C])WEK|ALDDKNC(BTD[C])WEK	2|1	0.58|0.72	0.01414|NA	0.65	0.09899	3	2
P55072	535	VCP	P55072_535	TERA_HUMAN Transitional endoplasmic reticulum ATPase OS=Homo sapiens OX=9606 GN=VCP PE=1 SV=4	AIANEC(BTD[C])QANFISIK|AIANEC(BTD[C])QANFISIK	1|2	0.65|0.65	NA|0.0	0.65	0	3	2
P61927	37	RPL37	P61927_37	RL37_HUMAN 60S ribosomal protein L37 OS=Homo sapiens OX=9606 GN=RPL37 PE=1 SV=2	C(BTD[C])GYPAK|	1|	0.65|	NA|	0.65	NA	1	1
P61978	205	HNRNPK	P61978_205	HNRPK_HUMAN Heterogeneous nuclear ribonucleoprotein K OS=Homo sapiens OX=9606 GN=HNRNPK PE=1 SV=1	|VVEC(BTD[C])IK	|3	|0.65	|0.08083	0.65	NA	3	1
Q14315	2552	FLNC	Q14315_2552	FLNC_HUMAN Filamin-C OS=Homo sapiens OX=9606 GN=FLNC PE=1 SV=3	VQLDC(BTD[C])R|VQLDC(BTD[C])R	2|1	0.68|0.62	0.0|NA	0.65	0.04243	3	2
Q96SK2	301	TMEM209	Q96SK2_301	TM209_HUMAN Transmembrane protein 209 OS=Homo sapiens OX=9606 GN=TMEM209 PE=1 SV=2	SQAPC(BTD[C])ANKDEADLSSK|	1|	0.65|	NA|	0.65	NA	1	1
Q99832	364	CCT7	Q99832_364	TCPH_HUMAN T-complex protein 1 subunit eta OS=Homo sapiens OX=9606 GN=CCT7 PE=1 SV=2	YNFFTGC(BTD[C])PK|	3|	0.65|	0.01155|	0.65	NA	3	1
Q9NVX2	280	NLE1	Q9NVX2_280	NLE1_HUMAN Notchless protein homolog 1 OS=Homo sapiens OX=9606 GN=NLE1 PE=1 SV=4	AHDGVLC(BTD[C])R|AHDGVLC(BTD[C])R	1|1	0.72|0.58	NA|NA	0.65	0.09899	2	2
Q9Y2Z0	49	SUGT1	Q9Y2Z0_49	SGT1_HUMAN Protein SGT1 homolog OS=Homo sapiens OX=9606 GN=SUGT1 PE=1 SV=3	ALEQKPDDAQYYC(BTD[C])QR|ALEQKPDDAQYYC(BTD[C])QR	1|1	0.65|0.65	NA|NA	0.65	0	2	2
P21980	290	TGM2	P21980_290	TGM2_HUMAN Protein-glutamine gamma-glutamyltransferase 2 OS=Homo sapiens OX=9606 GN=TGM2 PE=1 SV=2	C(BTD[C])LGIPTR|C(BTD[C])LGIPTR	2|1	0.59|0.7	0.0|NA	0.645	0.07778	3	2
P68402	35	PAFAH1B2	P68402_35	PA1B2_HUMAN Platelet-activating factor acetylhydrolase IB subunit beta OS=Homo sapiens OX=9606 GN=PAFAH1B2 PE=1 SV=1	FVLDC(BTD[C])K|FVLDC(BTD[C])K	3|1	0.61|0.68	0.0|NA	0.645	0.0495	4	2
Q01518	375	CAP1	Q01518_375	CAP1_HUMAN Adenylyl cyclase-associated protein 1 OS=Homo sapiens OX=9606 GN=CAP1 PE=1 SV=5	INSITVDNC(BTD[C])K|INSITVDNC(BTD[C])K	1|2	0.77|0.52	NA|0.09899	0.645	0.17678	3	2
Q08211	1029	DHX9	Q08211_1029	DHX9_HUMAN ATP-dependent RNA helicase A OS=Homo sapiens OX=9606 GN=DHX9 PE=1 SV=4	SSVNC(BTD[C])PFSSQDMK|SSVNC(BTD[C])PFSSQDMK	3|2	0.5|0.79	0.05196|0.46669	0.645	0.20506	5	2
Q6IS14	73	EIF5AL1	Q6IS14_73	IF5AL_HUMAN Eukaryotic translation initiation factor 5A-1-like OS=Homo sapiens OX=9606 GN=EIF5AL1 PE=2 SV=2	|KYEDIC(BTD[C])PSTHNMDVPNIK YEDIC(BTD[C])PSTHNMDVPNIK	|6	|0.645	|0.24214	0.645	NA	6	1
O43765	153	SGTA	O43765_153	SGTA_HUMAN Small glutamine-rich tetratricopeptide repeat-containing protein alpha OS=Homo sapiens OX=9606 GN=SGTA PE=1 SV=1	AIC(BTD[C])IDPAYSK|	1|	0.64|	NA|	0.64	NA	1	1
O94855	573	SEC24D	O94855_573	SC24D_HUMAN Protein transport protein Sec24D OS=Homo sapiens OX=9606 GN=SEC24D PE=1 SV=2	|AADC(BTD[C])PGK	|1	|0.64	|NA	0.64	NA	1	1
P05141	160	SLC25A5	P05141_160	ADT2_HUMAN ADP/ATP translocase 2 OS=Homo sapiens OX=9606 GN=SLC25A5 PE=1 SV=7	GLGDC(BTD[C])LVK|GLGDC(BTD[C])LVK	2|2	0.74|0.54	0.24042|0.0	0.64	0.14142	4	2
P10644	362	PRKAR1A	P10644_362	KAP0_HUMAN cAMP-dependent protein kinase type I-alpha regulatory subunit OS=Homo sapiens OX=9606 GN=PRKAR1A PE=1 SV=1	VLGPC(BTD[C])SDILK|	1|	0.64|	NA|	0.64	NA	1	1
P11586	326	MTHFD1	P11586_326	C1TC_HUMAN C-1-tetrahydrofolate synthase, cytoplasmic OS=Homo sapiens OX=9606 GN=MTHFD1 PE=1 SV=3	|SC(BTD[C])KPKPIGK	|2	|0.64	|0.0	0.64	NA	2	1
P42285	853	MTREX	P42285_853	MTREX_HUMAN Exosome RNA helicase MTR4 OS=Homo sapiens OX=9606 GN=MTREX PE=1 SV=3	TVLQMDELKC(BTD[C])R|	1|	0.64|	NA|	0.64	NA	1	1
P52272	114	HNRNPM	P52272_114	HNRPM_HUMAN Heterogeneous nuclear ribonucleoprotein M OS=Homo sapiens OX=9606 GN=HNRNPM PE=1 SV=3	GC(BTD[C])AVVEFK|GC(BTD[C])AVVEFK	1|1	0.65|0.63	NA|NA	0.64	0.01414	2	2
P54709	191	ATP1B3	P54709_191	AT1B3_HUMAN Sodium/potassium-transporting ATPase subunit beta-3 OS=Homo sapiens OX=9606 GN=ATP1B3 PE=1 SV=1	|IDC(BTD[C])VSK	|1	|0.64	|NA	0.64	NA	1	1
Q14152	478	EIF3A	Q14152_478	EIF3A_HUMAN Eukaryotic translation initiation factor 3 subunit A OS=Homo sapiens OX=9606 GN=EIF3A PE=1 SV=1	HC(BTD[C])DLQVR|	1|	0.64|	NA|	0.64	NA	1	1
Q15291	126	RBBP5	Q15291_126	RBBP5_HUMAN Retinoblastoma-binding protein 5 OS=Homo sapiens OX=9606 GN=RBBP5 PE=1 SV=2	VLVC(BTD[C])PMK|VLVC(BTD[C])PMK	2|2	0.59|0.69	0.0|0.01414	0.64	0.07071	4	2
Q96B26	251	EXOSC8	Q96B26_251	EXOS8_HUMAN Exosome complex component RRP43 OS=Homo sapiens OX=9606 GN=EXOSC8 PE=1 SV=1	|LQDC(BTD[C])MSR	|1	|0.64	|NA	0.64	NA	1	1
Q96PU4	432	UHRF2	Q96PU4_432	UHRF2_HUMAN E3 ubiquitin-protein ligase UHRF2 OS=Homo sapiens OX=9606 GN=UHRF2 PE=1 SV=1	|GMAC(BTD[C])VGR	|1	|0.64	|NA	0.64	NA	1	1
Q9NQ29	36	LUC7L	Q9NQ29_36	LUC7L_HUMAN Putative RNA-binding protein Luc7-like 1 OS=Homo sapiens OX=9606 GN=LUC7L PE=1 SV=1	FTDDRVC(BTD[C])K|	2|	0.64|	0.01414|	0.64	NA	2	1
Q9Y6A4	160	CFAP20	Q9Y6A4_160	CFA20_HUMAN Cilia- and flagella-associated protein 20 OS=Homo sapiens OX=9606 GN=CFAP20 PE=1 SV=1	VQIHANC(BTD[C])R|	1|	0.64|	NA|	0.64	NA	1	1
Q96I24	460	FUBP3	Q96I24_460	FUBP3_HUMAN Far upstream element-binding protein 3 OS=Homo sapiens OX=9606 GN=FUBP3 PE=1 SV=2	SSGC(BTD[C])FPNMAAK|SSGC(BTD[C])FPNMAAK	3|1	0.71|0.56	0.14434|NA	0.635	0.10607	4	2
O00231	202	PSMD11	O00231_202	PSD11_HUMAN 26S proteasome non-ATPase regulatory subunit 11 OS=Homo sapiens OX=9606 GN=PSMD11 PE=1 SV=3	TTANAIYC(BTD[C])PPK|	1|	0.63|	NA|	0.63	NA	1	1
O94808	226	GFPT2	O94808_226	GFPT2_HUMAN Glutamine--fructose-6-phosphate aminotransferase [isomerizing] 2 OS=Homo sapiens OX=9606 GN=GFPT2 PE=1 SV=3	|TC(BTD[C])TLENVK	|1	|0.63	|NA	0.63	NA	1	1
P09496	218	CLTA	P09496_218	CLCA_HUMAN Clathrin light chain A OS=Homo sapiens OX=9606 GN=CLTA PE=1 SV=1	|LC(BTD[C])DFNPK	|1	|0.63	|NA	0.63	NA	1	1
P14866	581	HNRNPL	P14866_581	HNRPL_HUMAN Heterogeneous nuclear ribonucleoprotein L OS=Homo sapiens OX=9606 GN=HNRNPL PE=1 SV=2	LC(BTD[C])FSTAQHAS|LC(BTD[C])FSTAQHAS	3|1	0.61|0.65	0.06928|NA	0.63	0.02828	4	2
P21333	717	FLNA	P21333_717	FLNA_HUMAN Filamin-A OS=Homo sapiens OX=9606 GN=FLNA PE=1 SV=4	VQVQDNEGC(BTD[C])PVEALVK|	2|	0.63|	0.0|	0.63	NA	2	1
P21333	478	FLNA	P21333_478	FLNA_HUMAN Filamin-A OS=Homo sapiens OX=9606 GN=FLNA PE=1 SV=4	|SPYTVTVGQAC(BTD[C])NPSACR	|1	|0.63	|NA	0.63	NA	1	1
P49368	40	CCT3	P49368_40	TCPG_HUMAN T-complex protein 1 subunit gamma OS=Homo sapiens OX=9606 GN=CCT3 PE=1 SV=4	TC(BTD[C])LGPK|TC(BTD[C])LGPK	3|1	0.57|0.69	0.3695|NA	0.63	0.08485	4	2
P52789	368	HK2	P52789_368	HXK2_HUMAN Hexokinase-2 OS=Homo sapiens OX=9606 GN=HK2 PE=1 SV=2	|LGLDPTQEDC(BTD[C])VATHR	|1	|0.63	|NA	0.63	NA	1	1
P62633	57	CNBP	P62633_57	CNBP_HUMAN Cellular nucleic acid-binding protein OS=Homo sapiens OX=9606 GN=CNBP PE=1 SV=1	C(BTD[C])GESGHLAK|C(BTD[C])GESGHLAK	3|4	0.66|0.6	0.0|0.03464	0.63	0.04243	7	2
Q8WV41	232	SNX33	Q8WV41_232	SNX33_HUMAN Sorting nexin-33 OS=Homo sapiens OX=9606 GN=SNX33 PE=1 SV=1	ANPHPFAC(BTD[C])SVEDPTK|	1|	0.63|	NA|	0.63	NA	1	1
Q96AG4	48	LRRC59	Q96AG4_48	LRC59_HUMAN Leucine-rich repeat-containing protein 59 OS=Homo sapiens OX=9606 GN=LRRC59 PE=1 SV=1	|ATILDLSC(BTD[C])NK	|2	|0.63	|0.0	0.63	NA	2	1
Q9UI10	69	EIF2B4	Q9UI10_69	EI2BD_HUMAN Translation initiation factor eIF-2B subunit delta OS=Homo sapiens OX=9606 GN=EIF2B4 PE=1 SV=2	GAEPETGSAVSAAQC(BTD[C])QVGPTR|	1|	0.63|	NA|	0.63	NA	1	1
Q9Y6Q5	241	AP1M2	Q9Y6Q5_241	AP1M2_HUMAN AP-1 complex subunit mu-2 OS=Homo sapiens OX=9606 GN=AP1M2 PE=1 SV=4	|FHQC(BTD[C])VR	|1	|0.63	|NA	0.63	NA	1	1
O95292	173	VAPB	O95292_173	VAPB_HUMAN Vesicle-associated membrane protein-associated protein B/C OS=Homo sapiens OX=9606 GN=VAPB PE=1 SV=3	|VMEEC(BTD[C])KR	|2	|0.625	|0.40305	0.625	NA	2	1
P05198	70	EIF2S1	P05198_70	IF2A_HUMAN Eukaryotic translation initiation factor 2 subunit 1 OS=Homo sapiens OX=9606 GN=EIF2S1 PE=1 SV=3	NEC(BTD[C])VVVIR|NEC(BTD[C])VVVIR	1|1	0.57|0.68	NA|NA	0.625	0.07778	2	2
P49327	212	FASN	P49327_212	FAS_HUMAN Fatty acid synthase OS=Homo sapiens OX=9606 GN=FASN PE=1 SV=3	|LGMLSPEGTC(BTD[C])K	|2	|0.625	|0.09192	0.625	NA	2	1
Q00325	237	SLC25A3	Q00325_237	MPCP_HUMAN Phosphate carrier protein, mitochondrial OS=Homo sapiens OX=9606 GN=SLC25A3 PE=1 SV=2	FAC(BTD[C])FER|FAC(BTD[C])FER	2|1	0.62|0.63	0.0|NA	0.625	0.00707	3	2
Q02880	413	TOP2B	Q02880_413	TOP2B_HUMAN DNA topoisomerase 2-beta OS=Homo sapiens OX=9606 GN=TOP2B PE=1 SV=3	SFGSKC(BTD[C])QLSEK|SFGSKC(BTD[C])QLSEK	1|1	0.63|0.62	NA|NA	0.625	0.00707	2	2
O15145	145	ARPC3	O15145_145	ARPC3_HUMAN Actin-related protein 2/3 complex subunit 3 OS=Homo sapiens OX=9606 GN=ARPC3 PE=1 SV=3	QETGLRLC(BTD[C])EK|	2|	0.62|	0.0|	0.62	NA	2	1
O75643	1127	SNRNP200	O75643_1127	U520_HUMAN U5 small nuclear ribonucleoprotein 200 kDa helicase OS=Homo sapiens OX=9606 GN=SNRNP200 PE=1 SV=2	MWQSMC(BTD[C])PLR|	1|	0.62|	NA|	0.62	NA	1	1
P05198	6	EIF2S1	P05198_6	IF2A_HUMAN Eukaryotic translation initiation factor 2 subunit 1 OS=Homo sapiens OX=9606 GN=EIF2S1 PE=1 SV=3	PGLSC(BTD[C])R|PGLSC(BTD[C])R	3|2	0.51|0.73	0.28006|0.33941	0.62	0.15556	5	2
P15529	64	CD46	P15529_64	MCP_HUMAN Membrane cofactor protein OS=Homo sapiens OX=9606 GN=CD46 PE=1 SV=3	VDYKC(BTD[C])K|	1|	0.62|	NA|	0.62	NA	1	1
P16070	53	CD44	P16070_53	CD44_HUMAN CD44 antigen OS=Homo sapiens OX=9606 GN=CD44 PE=1 SV=3	|TEAADLC(BTD[C])K	|1	|0.62	|NA	0.62	NA	1	1
P27797	105	CALR	P27797_105	CALR_HUMAN Calreticulin OS=Homo sapiens OX=9606 GN=CALR PE=1 SV=1	|HEQNIDC(BTD[C])GGGYVK	|3	|0.62	|0.1159	0.62	NA	3	1
P30519	265	HMOX2	P30519_265	HMOX2_HUMAN Heme oxygenase 2 OS=Homo sapiens OX=9606 GN=HMOX2 PE=1 SV=2	|KC(BTD[C])PFYAAEQDK	|3	|0.62	|0.05774	0.62	NA	3	1
Q15149	3299	PLEC	Q15149_3299	PLEC_HUMAN Plectin OS=Homo sapiens OX=9606 GN=PLEC PE=1 SV=3	GC(BTD[C])LDEETSR|	1|	0.62|	NA|	0.62	NA	1	1
Q5H9R7	844	PPP6R3	Q5H9R7_844	PP6R3_HUMAN Serine/threonine-protein phosphatase 6 regulatory subunit 3 OS=Homo sapiens OX=9606 GN=PPP6R3 PE=1 SV=2	C(BTD[C])AAPRPPSSSPEQR|	1|	0.62|	NA|	0.62	NA	1	1
Q92520	58	FAM3C	Q92520_58	FAM3C_HUMAN Protein FAM3C OS=Homo sapiens OX=9606 GN=FAM3C PE=1 SV=1	|YKC(BTD[C])GISK	|1	|0.62	|NA	0.62	NA	1	1
Q92598	650	HSPH1	Q92598_650	HS105_HUMAN Heat shock protein 105 kDa OS=Homo sapiens OX=9606 GN=HSPH1 PE=1 SV=1	DKLC(BTD[C])GPYEK|DKLC(BTD[C])GPYEK LC(BTD[C])GPYEK	4|5	0.57|0.67	0.05|0.20241	0.62	0.07071	9	2
Q92945	176	KHSRP	Q92945_176	FUBP2_HUMAN Far upstream element-binding protein 2 OS=Homo sapiens OX=9606 GN=KHSRP PE=1 SV=4	|IQQDSGC(BTD[C])K	|2	|0.62	|0.14142	0.62	NA	2	1
Q99832	450	CCT7	Q99832_450	TCPH_HUMAN T-complex protein 1 subunit eta OS=Homo sapiens OX=9606 GN=CCT7 PE=1 SV=2	|QLC(BTD[C])DNAGFDATNILNK	|1	|0.62	|NA	0.62	NA	1	1
Q9H3U1	927	UNC45A	Q9H3U1_927	UN45A_HUMAN Protein unc-45 homolog A OS=Homo sapiens OX=9606 GN=UNC45A PE=1 SV=1	|AAAAC(BTD[C])LDK	|2	|0.62	|0.0	0.62	NA	2	1
Q9NZB2	53	FAM120A	Q9NZB2_53	F120A_HUMAN Constitutive coactivator of PPAR-gamma-like protein 1 OS=Homo sapiens OX=9606 GN=FAM120A PE=1 SV=2	LLVDADNC(BTD[C])LHR|	1|	0.62|	NA|	0.62	NA	1	1
Q9Y6C9	79	MTCH2	Q9Y6C9_79	MTCH2_HUMAN Mitochondrial carrier homolog 2 OS=Homo sapiens OX=9606 GN=MTCH2 PE=1 SV=1	|LC(BTD[C])SGVLGTVVHGK	|1	|0.62	|NA	0.62	NA	1	1
Q9GZT9	127	EGLN1	Q9GZT9_127	EGLN1_HUMAN Egl nine homolog 1 OS=Homo sapiens OX=9606 GN=EGLN1 PE=1 SV=1	AKPPADPAAAASPC(BTD[C])R|AKPPADPAAAASPC(BTD[C])R	1|2	0.5|0.735	NA|0.09192	0.6175	0.16617	3	2
O60841	853	EIF5B	O60841_853	IF2P_HUMAN Eukaryotic translation initiation factor 5B OS=Homo sapiens OX=9606 GN=EIF5B PE=1 SV=4	|LAHC(BTD[C])EELR	|2	|0.615	|0.02121	0.615	NA	2	1
P18206	1053	VCL	P18206_1053	VINC_HUMAN Vinculin OS=Homo sapiens OX=9606 GN=VCL PE=1 SV=4	TNLLQVC(BTD[C])ER|TNLLQVC(BTD[C])ER	1|1	0.67|0.56	NA|NA	0.615	0.07778	2	2
P26639	630	TARS	P26639_630	SYTC_HUMAN Threonine--tRNA ligase, cytoplasmic OS=Homo sapiens OX=9606 GN=TARS PE=1 SV=3	QVMVVPVGPTC(BTD[C])DEYAQK|QVMVVPVGPTC(BTD[C])DEYAQK	1|1	0.7|0.53	NA|NA	0.615	0.12021	2	2
P62333	83	PSMC6	P62333_83	PRS10_HUMAN 26S proteasome regulatory subunit 10B OS=Homo sapiens OX=9606 GN=PSMC6 PE=1 SV=1	YVVGC(BTD[C])R|YVVGC(BTD[C])R	1|1	0.53|0.7	NA|NA	0.615	0.12021	2	2
Q14008	1203	CKAP5	Q14008_1203	CKAP5_HUMAN Cytoskeleton-associated protein 5 OS=Homo sapiens OX=9606 GN=CKAP5 PE=1 SV=3	TQMSSC(BTD[C])VAK|TQMSSC(BTD[C])VAK	1|2	0.54|0.69	NA|0.0	0.615	0.10607	3	2
O76094	50	SRP72	O76094_50	SRP72_HUMAN Signal recognition particle subunit SRP72 OS=Homo sapiens OX=9606 GN=SRP72 PE=1 SV=3	|DDVTALHC(BTD[C])K	|1	|0.61	|NA	0.61	NA	1	1
P42704	571	LRPPRC	P42704_571	LPPRC_HUMAN Leucine-rich PPR motif-containing protein, mitochondrial OS=Homo sapiens OX=9606 GN=LRPPRC PE=1 SV=3	|YC(BTD[C])QEPR	|3	|0.61	|0.06658	0.61	NA	3	1
P49588	773	AARS	P49588_773	SYAC_HUMAN Alanine--tRNA ligase, cytoplasmic OS=Homo sapiens OX=9606 GN=AARS PE=1 SV=2	KC(BTD[C])LSVMEAK|	2|	0.61|	0.0|	0.61	NA	2	1
P52701	1032	MSH6	P52701_1032	MSH6_HUMAN DNA mismatch repair protein Msh6 OS=Homo sapiens OX=9606 GN=MSH6 PE=1 SV=2	|DVSLKDC(BTD[C])MR	|1	|0.61	|NA	0.61	NA	1	1
P61247	96	RPS3A	P61247_96	RS3A_HUMAN 40S ribosomal protein S3a OS=Homo sapiens OX=9606 GN=RPS3A PE=1 SV=2	NC(BTD[C])LTNFHGMDLTR|NC(BTD[C])LTNFHGMDLTR	2|1	0.67|0.55	0.0|NA	0.61	0.08485	3	2
Q14204	4438	DYNC1H1	Q14204_4438	DYHC1_HUMAN Cytoplasmic dynein 1 heavy chain 1 OS=Homo sapiens OX=9606 GN=DYNC1H1 PE=1 SV=5	QDLADVVQVC(BTD[C])EGK|	1|	0.61|	NA|	0.61	NA	1	1
Q8WUY1	104	THEM6	Q8WUY1_104	THEM6_HUMAN Protein THEM6 OS=Homo sapiens OX=9606 GN=THEM6 PE=1 SV=2	AHTVLAASC(BTD[C])AR|AHTVLAASC(BTD[C])AR	1|1	0.57|0.65	NA|NA	0.61	0.05657	2	2
Q96B36	44	AKT1S1	Q96B36_44	AKTS1_HUMAN Proline-rich AKT1 substrate 1 OS=Homo sapiens OX=9606 GN=AKT1S1 PE=1 SV=1	PGPC(BTD[C])AYAAHGR|	1|	0.61|	NA|	0.61	NA	1	1
Q96L21	195	RPL10L	Q96L21_195	RL10L_HUMAN 60S ribosomal protein L10-like OS=Homo sapiens OX=9606 GN=RPL10L PE=1 SV=3	LIPDGC(BTD[C])GVK|	1|	0.61|	NA|	0.61	NA	1	1
Q99489	269	DDO	Q99489_269	OXDD_HUMAN D-aspartate oxidase OS=Homo sapiens OX=9606 GN=DDO PE=2 SV=1	|C(BTD[C])NLREK	|1	|0.61	|NA	0.61	NA	1	1
Q9H0A0	105	NAT10	Q9H0A0_105	NAT10_HUMAN RNA cytidine acetyltransferase OS=Homo sapiens OX=9606 GN=NAT10 PE=1 SV=2	YC(BTD[C])YYNETHK|	1|	0.61|	NA|	0.61	NA	1	1
Q9Y490	1927	TLN1	Q9Y490_1927	TLN1_HUMAN Talin-1 OS=Homo sapiens OX=9606 GN=TLN1 PE=1 SV=3	VQELGHGC(BTD[C])AALVTK|	4|	0.61|	0.01155|	0.61	NA	4	1
Q9Y490	1939	TLN1	Q9Y490_1939	TLN1_HUMAN Talin-1 OS=Homo sapiens OX=9606 GN=TLN1 PE=1 SV=3	AGALQC(BTD[C])SPSDAYTK|	2|	0.61|	0.0|	0.61	NA	2	1
O75367	297	H2AFY	O75367_297	H2AY_HUMAN Core histone macro-H2A.1 OS=Homo sapiens OX=9606 GN=H2AFY PE=1 SV=4	NC(BTD[C])LALADDKK|NC(BTD[C])LALADDKK	1|4	0.61|0.605	NA|0.00957	0.6075	0.00354	5	2
P40925	251	MDH1	P40925_251	MDHC_HUMAN Malate dehydrogenase, cytoplasmic OS=Homo sapiens OX=9606 GN=MDH1 PE=1 SV=4	AIC(BTD[C])DHVR|AIC(BTD[C])DHVR	4|3	0.635|0.58	0.03109|0.02309	0.6075	0.03889	7	2
P50395	414	GDI2	P50395_414	GDIB_HUMAN Rab GDP dissociation inhibitor beta OS=Homo sapiens OX=9606 GN=GDI2 PE=1 SV=2	TYDATTHFETTC(BTD[C])DDIK|TYDATTHFETTC(BTD[C])DDIK	1|1	0.63|0.58	NA|NA	0.605	0.03536	2	2
P52789	375	HK2	P52789_375	HXK2_HUMAN Hexokinase-2 OS=Homo sapiens OX=9606 GN=HK2 PE=1 SV=2	IC(BTD[C])QIVSTR|IC(BTD[C])QIVSTR	2|2	0.61|0.6	0.0|0.0	0.605	0.00707	4	2
P62333	193	PSMC6	P62333_193	PRS10_HUMAN 26S proteasome regulatory subunit 10B OS=Homo sapiens OX=9606 GN=PSMC6 PE=1 SV=1	AVASQLDC(BTD[C])NFLK|AVASQLDC(BTD[C])NFLK	3|2	0.63|0.58	0.04619|0.0	0.605	0.03536	5	2
Q9NSD9	151	FARSB	Q9NSD9_151	SYFB_HUMAN Phenylalanine--tRNA ligase beta subunit OS=Homo sapiens OX=9606 GN=FARSB PE=1 SV=3	LHQNIC(BTD[C])R|LHQNIC(BTD[C])R	1|1	0.73|0.48	NA|NA	0.605	0.17678	2	2
Q9NZM1	225	MYOF	Q9NZM1_225	MYOF_HUMAN Myoferlin OS=Homo sapiens OX=9606 GN=MYOF PE=1 SV=1	VHVC(BTD[C])GQTHR|VHVC(BTD[C])GQTHR	2|1	0.55|0.66	0.0|NA	0.605	0.07778	3	2
O43760	59	SYNGR2	O43760_59	SNG2_HUMAN Synaptogyrin-2 OS=Homo sapiens OX=9606 GN=SYNGR2 PE=1 SV=1	QMYC(BTD[C])VFNR|	1|	0.6|	NA|	0.6	NA	1	1
O94808	247	GFPT2	O94808_247	GFPT2_HUMAN Glutamine--fructose-6-phosphate aminotransferase [isomerizing] 2 OS=Homo sapiens OX=9606 GN=GFPT2 PE=1 SV=3	LDSSAC(BTD[C])LHAVGDK|	2|	0.6|	0.0|	0.6	NA	2	1
P08754	66	GNAI3	P08754_66	GNAI3_HUMAN Guanine nucleotide-binding protein G(i) subunit alpha OS=Homo sapiens OX=9606 GN=GNAI3 PE=1 SV=3	IIHEDGYSEDEC(BTD[C])K|	1|	0.6|	NA|	0.6	NA	1	1
P10515	488	DLAT	P10515_488	ODP2_HUMAN Dihydrolipoyllysine-residue acetyltransferase component of pyruvate dehydrogenase complex, mitochondrial OS=Homo sapiens OX=9606 GN=DLAT PE=1 SV=3	ASALAC(BTD[C])LK|	1|	0.6|	NA|	0.6	NA	1	1
P23229	131	ITGA6	P23229_131	ITA6_HUMAN Integrin alpha-6 OS=Homo sapiens OX=9606 GN=ITGA6 PE=1 SV=5	VVTC(BTD[C])AHR|	1|	0.6|	NA|	0.6	NA	1	1
P25398	130	RPS12	P25398_130	RS12_HUMAN 40S ribosomal protein S12 OS=Homo sapiens OX=9606 GN=RPS12 PE=1 SV=3	|DVIEEYFKC(BTD[C])K	|1	|0.6	|NA	0.6	NA	1	1
P31040	536	SDHA	P31040_536	SDHA_HUMAN Succinate dehydrogenase [ubiquinone] flavoprotein subunit, mitochondrial OS=Homo sapiens OX=9606 GN=SDHA PE=1 SV=2	VGSVLQEGC(BTD[C])GK|	1|	0.6|	NA|	0.6	NA	1	1
P49189	74	ALDH9A1	P49189_74	AL9A1_HUMAN 4-trimethylaminobutyraldehyde dehydrogenase OS=Homo sapiens OX=9606 GN=ALDH9A1 PE=1 SV=3	|SGMERC(BTD[C])R	|1	|0.6	|NA	0.6	NA	1	1
P60953	105	CDC42	P60953_105	CDC42_HUMAN Cell division control protein 42 homolog OS=Homo sapiens OX=9606 GN=CDC42 PE=1 SV=2	WVPEITHHC(BTD[C])PK|	1|	0.6|	NA|	0.6	NA	1	1
P61221	38	ABCE1	P61221_38	ABCE1_HUMAN ATP-binding cassette sub-family E member 1 OS=Homo sapiens OX=9606 GN=ABCE1 PE=1 SV=1	LC(BTD[C])IEVTPQSK|	1|	0.6|	NA|	0.6	NA	1	1
P63244	138	RACK1	P63244_138	RACK1_HUMAN Receptor of activated protein C kinase 1 OS=Homo sapiens OX=9606 GN=RACK1 PE=1 SV=3	LWNTLGVC(BTD[C])K|	1|	0.6|	NA|	0.6	NA	1	1
P78527	1742	PRKDC	P78527_1742	PRKDC_HUMAN DNA-dependent protein kinase catalytic subunit OS=Homo sapiens OX=9606 GN=PRKDC PE=1 SV=3	FNNYVDC(BTD[C])MK|	1|	0.6|	NA|	0.6	NA	1	1
Q00013	179	MPP1	Q00013_179	EM55_HUMAN 55 kDa erythrocyte membrane protein OS=Homo sapiens OX=9606 GN=MPP1 PE=1 SV=2	KDNLIPC(BTD[C])K|	1|	0.6|	NA|	0.6	NA	1	1
Q08211	438	DHX9	Q08211_438	DHX9_HUMAN ATP-dependent RNA helicase A OS=Homo sapiens OX=9606 GN=DHX9 PE=1 SV=4	AAEC(BTD[C])NIVVTQPR|	1|	0.6|	NA|	0.6	NA	1	1
Q15046	427	KARS	Q15046_427	SYK_HUMAN Lysine--tRNA ligase OS=Homo sapiens OX=9606 GN=KARS PE=1 SV=3	ILDDIC(BTD[C])VAK|	1|	0.6|	NA|	0.6	NA	1	1
Q8NFQ8	382	TOR1AIP2	Q8NFQ8_382	TOIP2_HUMAN Torsin-1A-interacting protein 2 OS=Homo sapiens OX=9606 GN=TOR1AIP2 PE=1 SV=1	YC(BTD[C])DHENAAFK|	1|	0.6|	NA|	0.6	NA	1	1
Q92552	276	MRPS27	Q92552_276	RT27_HUMAN 28S ribosomal protein S27, mitochondrial OS=Homo sapiens OX=9606 GN=MRPS27 PE=1 SV=3	VAASPEDIKLC(BTD[C])R|VAASPEDIKLC(BTD[C])R	1|3	0.6|0.6	NA|0.04041	0.6	0	4	2
Q92575	186	UBXN4	Q92575_186	UBXN4_HUMAN UBX domain-containing protein 4 OS=Homo sapiens OX=9606 GN=UBXN4 PE=1 SV=2	SDTATGGESAGHATSSQEPSGC(BTD[C])SDQRPAEDLNIR|	1|	0.6|	NA|	0.6	NA	1	1
Q96DI7	168	SNRNP40	Q96DI7_168	SNR40_HUMAN U5 small nuclear ribonucleoprotein 40 kDa protein OS=Homo sapiens OX=9606 GN=SNRNP40 PE=1 SV=1	RGPQLVC(BTD[C])TGSDDGTVK|	1|	0.6|	NA|	0.6	NA	1	1
Q96TA1	405	NIBAN2	Q96TA1_405	NIBA2_HUMAN Protein Niban 2 OS=Homo sapiens OX=9606 GN=NIBAN2 PE=1 SV=3	MQSC(BTD[C])YEK|MQSC(BTD[C])YEK	2|2	0.62|0.58	0.0|0.0	0.6	0.02828	4	2
Q9UBT2	185	UBA2	Q9UBT2_185	SAE2_HUMAN SUMO-activating enzyme subunit 2 OS=Homo sapiens OX=9606 GN=UBA2 PE=1 SV=2	|NTPSEPIHC(BTD[C])IVWAK	|1	|0.6	|NA	0.6	NA	1	1
Q9Y314	185	NOSIP	Q9Y314_185	NOSIP_HUMAN Nitric oxide synthase-interacting protein OS=Homo sapiens OX=9606 GN=NOSIP PE=1 SV=1	TVTC(BTD[C])PMSGKPLR TVTC(BTD[C])PMSGK|TVTC(BTD[C])PMSGKPLR TVTC(BTD[C])PMSGK	3|4	0.54|0.66	0.06429|0.15327	0.6	0.08485	7	2
P05023	663	ATP1A1	P05023_663	AT1A1_HUMAN Sodium/potassium-transporting ATPase subunit alpha-1 OS=Homo sapiens OX=9606 GN=ATP1A1 PE=1 SV=1	AC(BTD[C])VVHGSDLK|AC(BTD[C])VVHGSDLK	4|1	0.625|0.57	0.0469|NA	0.5975	0.03889	5	2
P62910	96	RPL32	P62910_96	RL32_HUMAN 60S ribosomal protein L32 OS=Homo sapiens OX=9606 GN=RPL32 PE=1 SV=2	SYC(BTD[C])AEIAHNVSSK|SYC(BTD[C])AEIAHNVSSK	4|1	0.505|0.69	0.01732|NA	0.5975	0.13081	5	2
Q14315	1991	FLNC	Q14315_1991	FLNC_HUMAN Filamin-C OS=Homo sapiens OX=9606 GN=FLNC PE=1 SV=3	APSGNEEPC(BTD[C])LLK|APSGNEEPC(BTD[C])LLK	2|2	0.5|0.695	0.05657|0.03536	0.5975	0.13789	4	2
Q99439	61	CNN2	Q99439_61	CNN2_HUMAN Calponin-2 OS=Homo sapiens OX=9606 GN=CNN2 PE=1 SV=4	DGTILC(BTD[C])TLMNK|DGTILC(BTD[C])TLMNK	4|3	0.745|0.45	0.23108|0.02309	0.5975	0.2086	7	2
O00410	348	IPO5	O00410_348	IPO5_HUMAN Importin-5 OS=Homo sapiens OX=9606 GN=IPO5 PE=1 SV=4	MAC(BTD[C])GLGGK|MAC(BTD[C])GLGGK	3|3	0.75|0.44	0.19975|0.02887	0.595	0.2192	6	2
O75369	991	FLNB	O75369_991	FLNB_HUMAN Filamin-B OS=Homo sapiens OX=9606 GN=FLNB PE=1 SV=2	KVVPC(BTD[C])LVTPVTGR VVPC(BTD[C])LVTPVTGR|VVPC(BTD[C])LVTPVTGR	2|2	0.71|0.48	0.33941|0.04243	0.595	0.16263	4	2
P15170	237	GSPT1	P15170_237	ERF3A_HUMAN Eukaryotic peptide chain release factor GTP-binding subunit ERF3A OS=Homo sapiens OX=9606 GN=GSPT1 PE=1 SV=1	YEEC(BTD[C])KEK|YEEC(BTD[C])KEK	1|1	0.71|0.48	NA|NA	0.595	0.16263	2	2
Q14137	108	BOP1	Q14137_108	BOP1_HUMAN Ribosome biogenesis protein BOP1 OS=Homo sapiens OX=9606 GN=BOP1 PE=1 SV=2	TTEEQVQASTPC(BTD[C])PR|TTEEQVQASTPC(BTD[C])PR	1|1	0.75|0.44	NA|NA	0.595	0.2192	2	2
Q9NVD7	352	PARVA	Q9NVD7_352	PARVA_HUMAN Alpha-parvin OS=Homo sapiens OX=9606 GN=PARVA PE=1 SV=1	PRPEDIVNC(BTD[C])DLK|PRPEDIVNC(BTD[C])DLK	3|1	0.66|0.53	0.1097|NA	0.595	0.09192	4	2
Q9ULV4	456	CORO1C	Q9ULV4_456	COR1C_HUMAN Coronin-1C OS=Homo sapiens OX=9606 GN=CORO1C PE=1 SV=1	DTIC(BTD[C])NQDER SIKDTIC(BTD[C])NQDER|SIKDTIC(BTD[C])NQDER DTIC(BTD[C])NQDER	7|3	0.59|0.6	0.16419|0.07	0.595	0.00707	10	2
P14618	49	PKM	P14618_49	KPYM_HUMAN Pyruvate kinase PKM OS=Homo sapiens OX=9606 GN=PKM PE=1 SV=4	NTGIIC(BTD[C])TIGPASR|NTGIIC(BTD[C])TIGPASR	6|3	0.725|0.46	0.21716|0.04359	0.5925	0.18738	9	2
O60664	60	PLIN3	O60664_60	PLIN3_HUMAN Perilipin-3 OS=Homo sapiens OX=9606 GN=PLIN3 PE=1 SV=3	TVC(BTD[C])DAAEK|	3|	0.59|	0.0|	0.59	NA	3	1
O75116	607	ROCK2	O75116_607	ROCK2_HUMAN Rho-associated protein kinase 2 OS=Homo sapiens OX=9606 GN=ROCK2 PE=1 SV=4	DLQDKNC(BTD[C])LLETAK NC(BTD[C])LLETAK|DLQDKNC(BTD[C])LLETAK	2|1	0.69|0.49	0.05657|NA	0.59	0.14142	3	2
O75822	207	EIF3J	O75822_207	EIF3J_HUMAN Eukaryotic translation initiation factor 3 subunit J OS=Homo sapiens OX=9606 GN=EIF3J PE=1 SV=2	ITNSLTVLC(BTD[C])SEK|	1|	0.59|	NA|	0.59	NA	1	1
O95639	55	CPSF4	O95639_55	CPSF4_HUMAN Cleavage and polyadenylation specificity factor subunit 4 OS=Homo sapiens OX=9606 GN=CPSF4 PE=1 SV=1	GGMC(BTD[C])PFR|	1|	0.59|	NA|	0.59	NA	1	1
P02751	141	FN1	P02751_141	FINC_HUMAN Fibronectin OS=Homo sapiens OX=9606 GN=FN1 PE=1 SV=4	C(BTD[C])HEGGQSYK|C(BTD[C])HEGGQSYK	1|1	0.73|0.45	NA|NA	0.59	0.19799	2	2
P04406	152	GAPDH	P04406_152	G3P_HUMAN Glyceraldehyde-3-phosphate dehydrogenase OS=Homo sapiens OX=9606 GN=GAPDH PE=1 SV=3	IISNASC(BTD[C])TTNCLAPLAK|IISNASC(BTD[C])TTNCLAPLAK	3|1	0.5|0.68	0.25813|NA	0.59	0.12728	4	2
P18031	344	PTPN1	P18031_344	PTN1_HUMAN Tyrosine-protein phosphatase non-receptor type 1 OS=Homo sapiens OX=9606 GN=PTPN1 PE=1 SV=1	EETQEDKDC(BTD[C])PIKEEK|	1|	0.59|	NA|	0.59	NA	1	1
P23528	80	CFL1	P23528_80	COF1_HUMAN Cofilin-1 OS=Homo sapiens OX=9606 GN=CFL1 PE=1 SV=3	MLPDKDC(BTD[C])R|MLPDKDC(BTD[C])R	24|22	0.58|0.6	0.25244|0.31938	0.59	0.01414	46	2
P30041	47	PRDX6	P30041_47	PRDX6_HUMAN Peroxiredoxin-6 OS=Homo sapiens OX=9606 GN=PRDX6 PE=1 SV=3	DFTPVC(BTD[C])TTELGR|DFTPVC(BTD[C])TTELGR	3|1	0.63|0.55	0.11547|NA	0.59	0.05657	4	2
P46939	3023	UTRN	P46939_3023	UTRO_HUMAN Utrophin OS=Homo sapiens OX=9606 GN=UTRN PE=1 SV=2	SC(BTD[C])FQQNNNKPEISVK|	1|	0.59|	NA|	0.59	NA	1	1
P55072	105	VCP	P55072_105	TERA_HUMAN Transitional endoplasmic reticulum ATPase OS=Homo sapiens OX=9606 GN=VCP PE=1 SV=4	LGDVISIQPC(BTD[C])PDVK|	1|	0.59|	NA|	0.59	NA	1	1
P55263	353	ADK	P55263_353	ADK_HUMAN Adenosine kinase OS=Homo sapiens OX=9606 GN=ADK PE=1 SV=2	TGC(BTD[C])TFPEKPDFH|	2|	0.59|	0.0|	0.59	NA	2	1
P63220	56	RPS21	P63220_56	RS21_HUMAN 40S ribosomal protein S21 OS=Homo sapiens OX=9606 GN=RPS21 PE=1 SV=1	TYAIC(BTD[C])GAIR|	3|	0.59|	0.0|	0.59	NA	3	1
Q06124	318	PTPN11	Q06124_318	PTN11_HUMAN Tyrosine-protein phosphatase non-receptor type 11 OS=Homo sapiens OX=9606 GN=PTPN11 PE=1 SV=2	C(BTD[C])NNSKPK|	1|	0.59|	NA|	0.59	NA	1	1
Q1KMD3	293	HNRNPUL2	Q1KMD3_293	HNRL2_HUMAN Heterogeneous nuclear ribonucleoprotein U-like protein 2 OS=Homo sapiens OX=9606 GN=HNRNPUL2 PE=1 SV=1	GKVC(BTD[C])FEAK|	2|	0.59|	0.0|	0.59	NA	2	1
Q6IBS0	275	TWF2	Q6IBS0_275	TWF2_HUMAN Twinfilin-2 OS=Homo sapiens OX=9606 GN=TWF2 PE=1 SV=2	MLYSSC(BTD[C])K|MLYSSC(BTD[C])K	3|2	0.54|0.64	0.04359|0.02828	0.59	0.07071	5	2
Q86Y56	349	DNAAF5	Q86Y56_349	DAAF5_HUMAN Dynein assembly factor 5, axonemal OS=Homo sapiens OX=9606 GN=DNAAF5 PE=1 SV=4	|RPVLGC(BTD[C])R	|1	|0.59	|NA	0.59	NA	1	1
Q8WTS6	288	SETD7	Q8WTS6_288	SETD7_HUMAN Histone-lysine N-methyltransferase SETD7 OS=Homo sapiens OX=9606 GN=SETD7 PE=1 SV=1	|YC(BTD[C])ASLGHK	|1	|0.59	|NA	0.59	NA	1	1
Q99798	126	ACO2	Q99798_126	ACON_HUMAN Aconitate hydratase, mitochondrial OS=Homo sapiens OX=9606 GN=ACO2 PE=1 SV=2	VAVPSTIHC(BTD[C])DHLIEAQVGGEK|	1|	0.59|	NA|	0.59	NA	1	1
Q9C0C9	341	UBE2O	Q9C0C9_341	UBE2O_HUMAN (E3-independent) E2 ubiquitin-conjugating enzyme OS=Homo sapiens OX=9606 GN=UBE2O PE=1 SV=3	LGC(BTD[C])FDHAQR|	1|	0.59|	NA|	0.59	NA	1	1
Q9HAS0	182	C17orf75	Q9HAS0_182	NJMU_HUMAN Protein Njmu-R1 OS=Homo sapiens OX=9606 GN=C17orf75 PE=1 SV=2	|NNMNC(BTD[C])EAR	|1	|0.59	|NA	0.59	NA	1	1
Q9Y678	516	COPG1	Q9Y678_516	COPG1_HUMAN Coatomer subunit gamma-1 OS=Homo sapiens OX=9606 GN=COPG1 PE=1 SV=1	RC(BTD[C])VMDDDNEVR|RC(BTD[C])VMDDDNEVR	1|2	0.6|0.58	NA|0.07071	0.59	0.01414	3	2
P21333	1402	FLNA	P21333_1402	FLNA_HUMAN Filamin-A OS=Homo sapiens OX=9606 GN=FLNA PE=1 SV=4	MSC(BTD[C])MDNK|MSC(BTD[C])MDNK	4|7	0.565|0.61	0.25539|0.0378	0.5875	0.03182	11	2
P23396	134	RPS3	P23396_134	RS3_HUMAN 40S ribosomal protein S3 OS=Homo sapiens OX=9606 GN=RPS3 PE=1 SV=2	GC(BTD[C])EVVVSGK|GC(BTD[C])EVVVSGK	4|2	0.68|0.495	0.18019|0.00707	0.5875	0.13081	6	2
P48643	253	CCT5	P48643_253	TCPE_HUMAN T-complex protein 1 subunit epsilon OS=Homo sapiens OX=9606 GN=CCT5 PE=1 SV=1	IAILTC(BTD[C])PFEPPKPK|IAILTC(BTD[C])PFEPPKPK	1|2	0.54|0.635	NA|0.00707	0.5875	0.06718	3	2
P05556	691	ITGB1	P05556_691	ITB1_HUMAN Integrin beta-1 OS=Homo sapiens OX=9606 GN=ITGB1 PE=1 SV=2	DKLPQPVQPDPVSHC(BTD[C])K|DKLPQPVQPDPVSHC(BTD[C])K	5|2	0.53|0.64	0.25165|0.11314	0.585	0.07778	7	2
P13693	172	TPT1	P13693_172	TCTP_HUMAN Translationally-controlled tumor protein OS=Homo sapiens OX=9606 GN=TPT1 PE=1 SV=1	DGLEMEKC(BTD[C])|DGLEMEKC(BTD[C])	6|4	0.58|0.59	0.09131|0.045	0.585	0.00707	10	2
O00567	376	NOP56	O00567_376	NOP56_HUMAN Nucleolar protein 56 OS=Homo sapiens OX=9606 GN=NOP56 PE=1 SV=4	YLANKC(BTD[C])SIASR|	1|	0.58|	NA|	0.58	NA	1	1
O95782	533	AP2A1	O95782_533	AP2A1_HUMAN AP-2 complex subunit alpha-1 OS=Homo sapiens OX=9606 GN=AP2A1 PE=1 SV=3	FHLC(BTD[C])SVATR|	1|	0.58|	NA|	0.58	NA	1	1
P17813	207	ENG	P17813_207	EGLN_HUMAN Endoglin OS=Homo sapiens OX=9606 GN=ENG PE=1 SV=2	GC(BTD[C])HLEGVAGHK|GC(BTD[C])HLEGVAGHK	3|1	0.58|0.58	0.13115|NA	0.58	0	4	2
P46779	13	RPL28	P46779_13	RL28_HUMAN 60S ribosomal protein L28 OS=Homo sapiens OX=9606 GN=RPL28 PE=1 SV=3	NC(BTD[C])SSFLIK|	2|	0.58|	0.0|	0.58	NA	2	1
P49189	45	ALDH9A1	P49189_45	AL9A1_HUMAN 4-trimethylaminobutyraldehyde dehydrogenase OS=Homo sapiens OX=9606 GN=ALDH9A1 PE=1 SV=3	|VIATFTC(BTD[C])SGEK	|1	|0.58	|NA	0.58	NA	1	1
P78527	1364	PRKDC	P78527_1364	PRKDC_HUMAN DNA-dependent protein kinase catalytic subunit OS=Homo sapiens OX=9606 GN=PRKDC PE=1 SV=3	DLC(BTD[C])NTHLMR|DLC(BTD[C])NTHLMR	1|1	0.44|0.72	NA|NA	0.58	0.19799	2	2
Q08211	242	DHX9	Q08211_242	DHX9_HUMAN ATP-dependent RNA helicase A OS=Homo sapiens OX=9606 GN=DHX9 PE=1 SV=4	LAAQSC(BTD[C])ALSLVR|	4|	0.58|	0.08083|	0.58	NA	4	1
Q14192	254	FHL2	Q14192_254	FHL2_HUMAN Four and a half LIM domains protein 2 OS=Homo sapiens OX=9606 GN=FHL2 PE=1 SV=3	|KC(BTD[C])SLSLVGR	|1	|0.58	|NA	0.58	NA	1	1
Q16666	191	IFI16	Q16666_191	IF16_HUMAN Gamma-interferon-inducible protein 16 OS=Homo sapiens OX=9606 GN=IFI16 PE=1 SV=3	|TVAKC(BTD[C])QVTPR	|1	|0.58	|NA	0.58	NA	1	1
Q92688	27	ANP32B	Q92688_27	AN32B_HUMAN Acidic leucine-rich nuclear phosphoprotein 32 family member B OS=Homo sapiens OX=9606 GN=ANP32B PE=1 SV=1	ELVLDNC(BTD[C])K|	1|	0.58|	NA|	0.58	NA	1	1
Q92974	306	ARHGEF2	Q92974_306	ARHG2_HUMAN Rho guanine nucleotide exchange factor 2 OS=Homo sapiens OX=9606 GN=ARHGEF2 PE=1 SV=4	|QALC(BTD[C])PGSTR	|1	|0.58	|NA	0.58	NA	1	1
Q96TA1	466	NIBAN2	Q96TA1_466	NIBA2_HUMAN Protein Niban 2 OS=Homo sapiens OX=9606 GN=NIBAN2 PE=1 SV=3	|GPTKEELC(BTD[C])K	|3	|0.58	|0.01155	0.58	NA	3	1
Q9Y3C6	133	PPIL1	Q9Y3C6_133	PPIL1_HUMAN Peptidyl-prolyl cis-trans isomerase-like 1 OS=Homo sapiens OX=9606 GN=PPIL1 PE=1 SV=1	VC(BTD[C])QGIGMVNR|VC(BTD[C])QGIGMVNR	1|2	0.61|0.55	NA|0.02828	0.58	0.04243	3	2
Q9Y5X3	227	SNX5	Q9Y5X3_227	SNX5_HUMAN Sorting nexin-5 OS=Homo sapiens OX=9606 GN=SNX5 PE=1 SV=1	IKDSC(BTD[C])VK|	1|	0.58|	NA|	0.58	NA	1	1
O14980	119	XPO1	O14980_119	XPO1_HUMAN Exportin-1 OS=Homo sapiens OX=9606 GN=XPO1 PE=1 SV=1	TSSDPTC(BTD[C])VEK|TSSDPTC(BTD[C])VEKEK TSSDPTC(BTD[C])VEK	1|2	0.52|0.635	NA|0.19092	0.5775	0.08132	3	2
Q9P0L0	179	VAPA	Q9P0L0_179	VAPA_HUMAN Vesicle-associated membrane protein-associated protein A OS=Homo sapiens OX=9606 GN=VAPA PE=1 SV=3	KLMEEC(BTD[C])K LMEEC(BTD[C])KR LMEEC(BTD[C])K|KLMEEC(BTD[C])K	5|4	0.56|0.595	0.21557|0.45719	0.5775	0.02475	9	2
P24752	126	ACAT1	P24752_126	THIL_HUMAN Acetyl-CoA acetyltransferase, mitochondrial OS=Homo sapiens OX=9606 GN=ACAT1 PE=1 SV=1	VC(BTD[C])ASGMK|VC(BTD[C])ASGMK	1|3	0.66|0.49	NA|0.0866	0.575	0.12021	4	2
P13639	693	EEF2	P13639_693	EF2_HUMAN Elongation factor 2 OS=Homo sapiens OX=9606 GN=EEF2 PE=1 SV=4	EGALC(BTD[C])EENMR|EGALC(BTD[C])EENMR	6|2	0.575|0.57	0.03327|0.0	0.5725	0.00354	8	2
P61247	139	RPS3A	P61247_139	RS3A_HUMAN 40S ribosomal protein S3a OS=Homo sapiens OX=9606 GN=RPS3A PE=1 SV=2	LFC(BTD[C])VGFTK|LFC(BTD[C])VGFTK	2|1	0.535|0.61	0.10607|NA	0.5725	0.05303	3	2
O43776	511	NARS	O43776_511	SYNC_HUMAN Asparagine--tRNA ligase, cytoplasmic OS=Homo sapiens OX=9606 GN=NARS PE=1 SV=1	|YGTC(BTD[C])PHGGYGLGLER	|1	|0.57	|NA	0.57	NA	1	1
O60232	125	ZNRD2	O60232_125	ZNRD2_HUMAN Protein ZNRD2 OS=Homo sapiens OX=9606 GN=ZNRD2 PE=1 SV=1	PAPQPPVPRPEHC(BTD[C])EGAAAGLK|	1|	0.57|	NA|	0.57	NA	1	1
O60884	308	DNAJA2	O60884_308	DNJA2_HUMAN DnaJ homolog subfamily A member 2 OS=Homo sapiens OX=9606 GN=DNAJA2 PE=1 SV=1	VIEPGC(BTD[C])VR|	2|	0.57|	0.0|	0.57	NA	2	1
P17980	121	PSMC3	P17980_121	PRS6A_HUMAN 26S proteasome regulatory subunit 6A OS=Homo sapiens OX=9606 GN=PSMC3 PE=1 SV=3	|GKC(BTD[C])AVIK	|1	|0.57	|NA	0.57	NA	1	1
P25786	85	PSMA1	P25786_85	PSA1_HUMAN Proteasome subunit alpha type-1 OS=Homo sapiens OX=9606 GN=PSMA1 PE=1 SV=1	LLC(BTD[C])NFMR|	1|	0.57|	NA|	0.57	NA	1	1
P49419	70	ALDH7A1	P49419_70	AL7A1_HUMAN Alpha-aminoadipic semialdehyde dehydrogenase OS=Homo sapiens OX=9606 GN=ALDH7A1 PE=1 SV=5	GEVITTYC(BTD[C])PANNEPIAR|	1|	0.57|	NA|	0.57	NA	1	1
P52888	246	THOP1	P52888_246	THOP1_HUMAN Thimet oligopeptidase OS=Homo sapiens OX=9606 GN=THOP1 PE=1 SV=2	|KVEEAFNC(BTD[C])R	|2	|0.57	|0.0	0.57	NA	2	1
P61289	92	PSME3	P61289_92	PSME3_HUMAN Proteasome activator complex subunit 3 OS=Homo sapiens OX=9606 GN=PSME3 PE=1 SV=1	RLDEC(BTD[C])EEAFQGTK|	1|	0.57|	NA|	0.57	NA	1	1
Q14204	867	DYNC1H1	Q14204_867	DYHC1_HUMAN Cytoplasmic dynein 1 heavy chain 1 OS=Homo sapiens OX=9606 GN=DYNC1H1 PE=1 SV=5	SLETC(BTD[C])MYDHK|SLETC(BTD[C])MYDHK	4|3	0.62|0.52	0.15011|0.06928	0.57	0.07071	7	2
Q14566	636	MCM6	Q14566_636	MCM6_HUMAN DNA replication licensing factor MCM6 OS=Homo sapiens OX=9606 GN=MCM6 PE=1 SV=1	|MHC(BTD[C])CDEVQPK	|1	|0.57	|NA	0.57	NA	1	1
Q3ZCQ8	249	TIMM50	Q3ZCQ8_249	TIM50_HUMAN Mitochondrial import inner membrane translocase subunit TIM50 OS=Homo sapiens OX=9606 GN=TIMM50 PE=1 SV=2	|VVVVDC(BTD[C])KK	|2	|0.57	|0.0	0.57	NA	2	1
Q5W111	150	SPRYD7	Q5W111_150	SPRY7_HUMAN SPRY domain-containing protein 7 OS=Homo sapiens OX=9606 GN=SPRYD7 PE=1 SV=2	NMHC(BTD[C])PASGIR|	1|	0.57|	NA|	0.57	NA	1	1
Q99426	165	TBCB	Q99426_165	TBCB_HUMAN Tubulin-folding cofactor B OS=Homo sapiens OX=9606 GN=TBCB PE=1 SV=2	AQASSIPVGSRC(BTD[C])EVR|	1|	0.57|	NA|	0.57	NA	1	1
Q99613	752	EIF3C	Q99613_752	EIF3C_HUMAN Eukaryotic translation initiation factor 3 subunit C OS=Homo sapiens OX=9606 GN=EIF3C PE=1 SV=1	TC(BTD[C])HSFIINEK|TC(BTD[C])HSFIINEK	4|2	0.61|0.53	0.10392|0.0	0.57	0.05657	6	2
Q9BR76	345	CORO1B	Q9BR76_345	COR1B_HUMAN Coronin-1B OS=Homo sapiens OX=9606 GN=CORO1B PE=1 SV=1	|KC(BTD[C])EPIVMTVPR	|1	|0.57	|NA	0.57	NA	1	1
Q9HA77	387	CARS2	Q9HA77_387	SYCM_HUMAN Probable cysteine--tRNA ligase, mitochondrial OS=Homo sapiens OX=9606 GN=CARS2 PE=1 SV=1	|GQLAC(BTD[C])GSVR	|3	|0.57	|0.13279	0.57	NA	3	1
Q9P2E9	1216	RRBP1	Q9P2E9_1216	RRBP1_HUMAN Ribosome-binding protein 1 OS=Homo sapiens OX=9606 GN=RRBP1 PE=1 SV=5	HMAAASAEC(BTD[C])QNYAK|	2|	0.57|	0.18385|	0.57	NA	2	1
Q9P2J5	546	LARS	Q9P2J5_546	SYLC_HUMAN Leucine--tRNA ligase, cytoplasmic OS=Homo sapiens OX=9606 GN=LARS PE=1 SV=2	QTSQC(BTD[C])LK|QTSQC(BTD[C])LK	2|2	0.66|0.48	0.0|0.0	0.57	0.12728	4	2
Q9P2J5	248	LARS	Q9P2J5_248	SYLC_HUMAN Leucine--tRNA ligase, cytoplasmic OS=Homo sapiens OX=9606 GN=LARS PE=1 SV=2	|DGQPC(BTD[C])MDHDR	|3	|0.57	|0.0	0.57	NA	3	1
Q9Y230	227	RUVBL2	Q9Y230_227	RUVB2_HUMAN RuvB-like 2 OS=Homo sapiens OX=9606 GN=RUVBL2 PE=1 SV=3	|FVQC(BTD[C])PDGELQK	|1	|0.57	|NA	0.57	NA	1	1
Q9Y570	238	PPME1	Q9Y570_238	PPME1_HUMAN Protein phosphatase methylesterase 1 OS=Homo sapiens OX=9606 GN=PPME1 PE=1 SV=3	|QC(BTD[C])EGITSPEGSK	|1	|0.57	|NA	0.57	NA	1	1
P68104	411	EEF1A1	P68104_411	EF1A1_HUMAN Elongation factor 1-alpha 1 OS=Homo sapiens OX=9606 GN=EEF1A1 PE=1 SV=1	SGDAAIVDMVPGKPMC(BTD[C])VESFSDYPPLGR PMC(BTD[C])VESFSDYPPLGR|SGDAAIVDMVPGKPMC(BTD[C])VESFSDYPPLGR PMC(BTD[C])VESFSDYPPLGR	4|4	0.56|0.575	0.01258|0.18136	0.5675	0.01061	8	2
P14618	326	PKM	P14618_326	KPYM_HUMAN Pyruvate kinase PKM OS=Homo sapiens OX=9606 GN=PKM PE=1 SV=4	AGKPVIC(BTD[C])ATQMLESMIK|PVIC(BTD[C])ATQMLESMIK	1|2	0.63|0.5	NA|0.0	0.565	0.09192	3	2
P16615	997	ATP2A2	P16615_997	AT2A2_HUMAN Sarcoplasmic/endoplasmic reticulum calcium ATPase 2 OS=Homo sapiens OX=9606 GN=ATP2A2 PE=1 SV=1	NYLEPGKEC(BTD[C])VQPATK|NYLEPGKEC(BTD[C])VQPATK	3|3	0.42|0.71	0.07506|0.37634	0.565	0.20506	6	2
P18206	737	VCL	P18206_737	VINC_HUMAN Vinculin OS=Homo sapiens OX=9606 GN=VCL PE=1 SV=4	DLDKC(BTD[C])K|DLDKC(BTD[C])K	4|1	0.64|0.49	0.18875|NA	0.565	0.10607	5	2
P53618	390	COPB1	P53618_390	COPB_HUMAN Coatomer subunit beta OS=Homo sapiens OX=9606 GN=COPB1 PE=1 SV=3	TLHSC(BTD[C])SVR|TLHSC(BTD[C])SVR	3|4	0.51|0.62	0.02082|0.10178	0.565	0.07778	7	2
Q14247	246	CTTN	Q14247_246	SRC8_HUMAN Src substrate cortactin OS=Homo sapiens OX=9606 GN=CTTN PE=1 SV=2	QDKC(BTD[C])ALGWDHQEK|QDKC(BTD[C])ALGWDHQEK	2|1	0.58|0.55	0.0|NA	0.565	0.02121	3	2
O15226	424	NKRF	O15226_424	NKRF_HUMAN NF-kappa-B-repressing factor OS=Homo sapiens OX=9606 GN=NKRF PE=1 SV=2	SSQC(BTD[C])HTGSSPR|	1|	0.56|	NA|	0.56	NA	1	1
O75351	62	VPS4B	O75351_62	VPS4B_HUMAN Vacuolar protein sorting-associated protein 4B OS=Homo sapiens OX=9606 GN=VPS4B PE=1 SV=2	AKC(BTD[C])TEYLDR|	1|	0.56|	NA|	0.56	NA	1	1
O75410	174	TACC1	O75410_174	TACC1_HUMAN Transforming acidic coiled-coil-containing protein 1 OS=Homo sapiens OX=9606 GN=TACC1 PE=1 SV=2	|AAHGC(BTD[C])VTAVSGK	|1	|0.56	|NA	0.56	NA	1	1
P11387	453	TOP1	P11387_453	TOP1_HUMAN DNA topoisomerase 1 OS=Homo sapiens OX=9606 GN=TOP1 PE=1 SV=2	|LKKC(BTD[C])VDK	|1	|0.56	|NA	0.56	NA	1	1
P19784	148	CSNK2A2	P19784_148	CSK22_HUMAN Casein kinase II subunit alpha' OS=Homo sapiens OX=9606 GN=CSNK2A2 PE=1 SV=1	ALDYC(BTD[C])HSK|ALDYC(BTD[C])HSK	1|1	0.64|0.48	NA|NA	0.56	0.11314	2	2
P21333	1157	FLNA	P21333_1157	FLNA_HUMAN Filamin-A OS=Homo sapiens OX=9606 GN=FLNA PE=1 SV=4	AHVVPC(BTD[C])FDASK|AHVVPC(BTD[C])FDASK	1|2	0.58|0.54	NA|0.0	0.56	0.02828	3	2
P28838	462	LAP3	P28838_462	AMPL_HUMAN Cytosol aminopeptidase OS=Homo sapiens OX=9606 GN=LAP3 PE=1 SV=3	SAGAC(BTD[C])TAAAFLK|SAGAC(BTD[C])TAAAFLK	2|1	0.46|0.66	0.0|NA	0.56	0.14142	3	2
P42704	394	LRPPRC	P42704_394	LPPRC_HUMAN Leucine-rich PPR motif-containing protein, mitochondrial OS=Homo sapiens OX=9606 GN=LRPPRC PE=1 SV=3	LTDYC(BTD[C])K|	2|	0.56|	0.0|	0.56	NA	2	1
P51003	36	PAPOLA	P51003_36	PAPOA_HUMAN Poly(A) polymerase alpha OS=Homo sapiens OX=9606 GN=PAPOLA PE=1 SV=4	ETDC(BTD[C])VLTQK|ETDC(BTD[C])VLTQK	2|1	0.58|0.54	0.12728|NA	0.56	0.02828	3	2
P62495	335	ETF1	P62495_335	ERF1_HUMAN Eukaryotic peptide chain release factor subunit 1 OS=Homo sapiens OX=9606 GN=ETF1 PE=1 SV=3	|YVLHC(BTD[C])QGTEEEK	|1	|0.56	|NA	0.56	NA	1	1
P62826	120	RAN	P62826_120	RAN_HUMAN GTP-binding nuclear protein Ran OS=Homo sapiens OX=9606 GN=RAN PE=1 SV=3	VCENIPIVLC(BTD[C])GNK|	2|	0.56|	0.0|	0.56	NA	2	1
P78417	192	GSTO1	P78417_192	GSTO1_HUMAN Glutathione S-transferase omega-1 OS=Homo sapiens OX=9606 GN=GSTO1 PE=1 SV=2	LNEC(BTD[C])VDHTPK|LNEC(BTD[C])VDHTPK	3|3	0.47|0.65	0.27135|0.21071	0.56	0.12728	6	2
Q01970	221	PLCB3	Q01970_221	PLCB3_HUMAN 1-phosphatidylinositol 4,5-bisphosphate phosphodiesterase beta-3 OS=Homo sapiens OX=9606 GN=PLCB3 PE=1 SV=2	|LC(BTD[C])LRPDIDK	|1	|0.56	|NA	0.56	NA	1	1
Q10567	144	AP1B1	Q10567_144	AP1B1_HUMAN AP-1 complex subunit beta-1 OS=Homo sapiens OX=9606 GN=AP1B1 PE=1 SV=2	KTAAVC(BTD[C])VAK TAAVC(BTD[C])VAK|	3|	0.56|	0.26287|	0.56	NA	3	1
Q92551	248	IP6K1	Q92551_248	IP6K1_HUMAN Inositol hexakisphosphate kinase 1 OS=Homo sapiens OX=9606 GN=IP6K1 PE=1 SV=3	|KC(BTD[C])EQSTSATLGVR	|1	|0.56	|NA	0.56	NA	1	1
Q99714	91	HSD17B10	Q99714_91	HCD2_HUMAN 3-hydroxyacyl-CoA dehydrogenase type-2 OS=Homo sapiens OX=9606 GN=HSD17B10 PE=1 SV=3	|VDVAVNC(BTD[C])AGIAVASK	|1	|0.56	|NA	0.56	NA	1	1
Q99805	250	TM9SF2	Q99805_250	TM9S2_HUMAN Transmembrane 9 superfamily member 2 OS=Homo sapiens OX=9606 GN=TM9SF2 PE=1 SV=1	|HTHIDKPDC(BTD[C])SGPPMDISNK	|1	|0.56	|NA	0.56	NA	1	1
Q9HD45	428	TM9SF3	Q9HD45_428	TM9S3_HUMAN Transmembrane 9 superfamily member 3 OS=Homo sapiens OX=9606 GN=TM9SF3 PE=1 SV=2	NLSGQPNFPC(BTD[C])R|NLSGQPNFPC(BTD[C])R	3|2	0.49|0.63	0.01155|0.0	0.56	0.09899	5	2
Q9NVV4	82	MTPAP	Q9NVV4_82	PAPD1_HUMAN Poly(A) RNA polymerase, mitochondrial OS=Homo sapiens OX=9606 GN=MTPAP PE=1 SV=1	TVLIHC(BTD[C])PEK|	1|	0.56|	NA|	0.56	NA	1	1
Q9UQ35	1480	SRRM2	Q9UQ35_1480	SRRM2_HUMAN Serine/arginine repetitive matrix protein 2 OS=Homo sapiens OX=9606 GN=SRRM2 PE=1 SV=2	|GRSEC(BTD[C])DSSPEPK	|1	|0.56	|NA	0.56	NA	1	1
P23284	202	PPIB	P23284_202	PPIB_HUMAN Peptidyl-prolyl cis-trans isomerase B OS=Homo sapiens OX=9606 GN=PPIB PE=1 SV=2	DVIIADC(BTD[C])GK|DVIIADC(BTD[C])GK	2|1	0.565|0.55	0.06364|NA	0.5575	0.01061	3	2
O43390	99	HNRNPR	O43390_99	HNRPR_HUMAN Heterogeneous nuclear ribonucleoprotein R OS=Homo sapiens OX=9606 GN=HNRNPR PE=1 SV=1	SAFLC(BTD[C])GVMK|	4|	0.555|	0.03559|	0.555	NA	4	1
P15880	182	RPS2	P15880_182	RS2_HUMAN 40S ribosomal protein S2 OS=Homo sapiens OX=9606 GN=RPS2 PE=1 SV=2	IGKPHTVPC(BTD[C])K|IGKPHTVPC(BTD[C])K PHTVPC(BTD[C])K	1|3	0.56|0.55	NA|0.16258	0.555	0.00707	4	2
P17655	82	CAPN2	P17655_82	CAN2_HUMAN Calpain-2 catalytic subunit OS=Homo sapiens OX=9606 GN=CAPN2 PE=1 SV=6	RPTEIC(BTD[C])ADPQFIIGGATR|RPTEIC(BTD[C])ADPQFIIGGATR	1|1	0.53|0.58	NA|NA	0.555	0.03536	2	2
P18206	545	VCL	P18206_545	VINC_HUMAN Vinculin OS=Homo sapiens OX=9606 GN=VCL PE=1 SV=4	QDLLAKC(BTD[C])DR|QDLLAKC(BTD[C])DR	2|4	0.65|0.46	0.28284|0.0	0.555	0.13435	6	2
Q969N2	195	PIGT	Q969N2_195	PIGT_HUMAN GPI transamidase component PIG-T OS=Homo sapiens OX=9606 GN=PIGT PE=1 SV=1	LLPC(BTD[C])SSK|LLPC(BTD[C])SSK	1|1	0.67|0.44	NA|NA	0.555	0.16263	2	2
O75083	225	WDR1	O75083_225	WDR1_HUMAN WD repeat-containing protein 1 OS=Homo sapiens OX=9606 GN=WDR1 PE=1 SV=4	VC(BTD[C])ALGGSK|VC(BTD[C])ALGGSK	2|2	0.595|0.51	0.14849|0.0	0.5525	0.0601	4	2
P30566	304	ADSL	P30566_304	PUR8_HUMAN Adenylosuccinate lyase OS=Homo sapiens OX=9606 GN=ADSL PE=1 SV=2	SERC(BTD[C])CSLAR|SERC(BTD[C])CSLAR	2|2	0.525|0.58	0.10607|0.01414	0.5525	0.03889	4	2
O00159	625	MYO1C	O00159_625	MYO1C_HUMAN Unconventional myosin-Ic OS=Homo sapiens OX=9606 GN=MYO1C PE=1 SV=4	C(BTD[C])IKPNDAK|C(BTD[C])IKPNDAK	1|2	0.52|0.58	NA|0.0	0.55	0.04243	3	2
O15533	91	TAPBP	O15533_91	TPSN_HUMAN Tapasin OS=Homo sapiens OX=9606 GN=TAPBP PE=1 SV=1	GAPAPHC(BTD[C])EMSR|GAPAPHC(BTD[C])EMSR	3|3	0.66|0.44	0.1601|0.04041	0.55	0.15556	6	2
P09382	131	LGALS1	P09382_131	LEG1_HUMAN Galectin-1 OS=Homo sapiens OX=9606 GN=LGALS1 PE=1 SV=2	IKC(BTD[C])VAFD|	1|	0.55|	NA|	0.55	NA	1	1
P11216	437	PYGB	P11216_437	PYGB_HUMAN Glycogen phosphorylase, brain form OS=Homo sapiens OX=9606 GN=PYGB PE=1 SV=5	MSVIEEGDC(BTD[C])KR|	1|	0.55|	NA|	0.55	NA	1	1
P14618	474	PKM	P14618_474	KPYM_HUMAN Pyruvate kinase PKM OS=Homo sapiens OX=9606 GN=PKM PE=1 SV=4	GIFPVLC(BTD[C])K|	2|	0.55|	0.0|	0.55	NA	2	1
P19174	881	PLCG1	P19174_881	PLCG1_HUMAN 1-phosphatidylinositol 4,5-bisphosphate phosphodiesterase gamma-1 OS=Homo sapiens OX=9606 GN=PLCG1 PE=1 SV=1	GVLDVPAC(BTD[C])QIAIRPEGK|	1|	0.55|	NA|	0.55	NA	1	1
P35579	988	MYH9	P35579_988	MYH9_HUMAN Myosin-9 OS=Homo sapiens OX=9606 GN=MYH9 PE=1 SV=4	|KLEEEQIILEDQNC(BTD[C])K	|1	|0.55	|NA	0.55	NA	1	1
P40939	747	HADHA	P40939_747	ECHA_HUMAN Trifunctional enzyme subunit alpha, mitochondrial OS=Homo sapiens OX=9606 GN=HADHA PE=1 SV=2	QFTPC(BTD[C])QLLADHANSPNK|	1|	0.55|	NA|	0.55	NA	1	1
P55036	37	PSMD4	P55036_37	PSMD4_HUMAN 26S proteasome non-ATPase regulatory subunit 4 OS=Homo sapiens OX=9606 GN=PSMD4 PE=1 SV=1	LQAQQDAVNIVC(BTD[C])HSK|	3|	0.55|	0.05774|	0.55	NA	3	1
P60174	255	TPI1	P60174_255	TPIS_HUMAN Triosephosphate isomerase OS=Homo sapiens OX=9606 GN=TPI1 PE=1 SV=3	|IIYGGSVTGATC(BTD[C])K	|2	|0.55	|0.0	0.55	NA	2	1
P63010	857	AP2B1	P63010_857	AP2B1_HUMAN AP-2 complex subunit beta OS=Homo sapiens OX=9606 GN=AP2B1 PE=1 SV=1	|EC(BTD[C])HLNADTVSSK	|4	|0.55	|0.03464	0.55	NA	4	1
Q00577	272	PURA	Q00577_272	PURA_HUMAN Transcriptional activator protein Pur-alpha OS=Homo sapiens OX=9606 GN=PURA PE=1 SV=2	|FGHTFC(BTD[C])K	|1	|0.55	|NA	0.55	NA	1	1
Q00610	491	CLTC	Q00610_491	CLH1_HUMAN Clathrin heavy chain 1 OS=Homo sapiens OX=9606 GN=CLTC PE=1 SV=5	VIQC(BTD[C])FAETGQVQK|	1|	0.55|	NA|	0.55	NA	1	1
Q13433	303	SLC39A6	Q13433_303	S39A6_HUMAN Zinc transporter ZIP6 OS=Homo sapiens OX=9606 GN=SLC39A6 PE=1 SV=3	SC(BTD[C])LIHTSEK|SC(BTD[C])LIHTSEK	1|1	0.51|0.59	NA|NA	0.55	0.05657	2	2
Q14008	427	CKAP5	Q14008_427	CKAP5_HUMAN Cytoskeleton-associated protein 5 OS=Homo sapiens OX=9606 GN=CKAP5 PE=1 SV=3	HC(BTD[C])TASTLPK|HC(BTD[C])TASTLPK	1|1	0.5|0.6	NA|NA	0.55	0.07071	2	2
Q14974	543	KPNB1	Q14974_543	IMB1_HUMAN Importin subunit beta-1 OS=Homo sapiens OX=9606 GN=KPNB1 PE=1 SV=2	NSAKDC(BTD[C])YPAVQK DC(BTD[C])YPAVQK|NSAKDC(BTD[C])YPAVQK	5|2	0.5|0.6	0.1033|0.0	0.55	0.07071	7	2
Q15061	291	WDR43	Q15061_291	WDR43_HUMAN WD repeat-containing protein 43 OS=Homo sapiens OX=9606 GN=WDR43 PE=1 SV=3	|LAVVC(BTD[C])R	|1	|0.55	|NA	0.55	NA	1	1
Q16401	412	PSMD5	Q16401_412	PSMD5_HUMAN 26S proteasome non-ATPase regulatory subunit 5 OS=Homo sapiens OX=9606 GN=PSMD5 PE=1 SV=3	|GISSQPFPELHC(BTD[C])AALK	|1	|0.55	|NA	0.55	NA	1	1
Q7Z4S6	1144	KIF21A	Q7Z4S6_1144	KI21A_HUMAN Kinesin-like protein KIF21A OS=Homo sapiens OX=9606 GN=KIF21A PE=1 SV=2	|LC(BTD[C])GEVKPK	|1	|0.55	|NA	0.55	NA	1	1
Q8NG31	2216	KNL1	Q8NG31_2216	KNL1_HUMAN Kinetochore scaffold 1 OS=Homo sapiens OX=9606 GN=KNL1 PE=1 SV=3	TC(BTD[C])TTQHQLPK|	1|	0.55|	NA|	0.55	NA	1	1
Q99714	58	HSD17B10	Q99714_58	HCD2_HUMAN 3-hydroxyacyl-CoA dehydrogenase type-2 OS=Homo sapiens OX=9606 GN=HSD17B10 PE=1 SV=3	LGNNC(BTD[C])VFAPADVTSEK|	2|	0.55|	0.0|	0.55	NA	2	1
Q99832	310	CCT7	Q99832_310	TCPH_HUMAN T-complex protein 1 subunit eta OS=Homo sapiens OX=9606 GN=CCT7 PE=1 SV=2	DMFC(BTD[C])AGR|DMFC(BTD[C])AGR	3|1	0.53|0.57	0.08327|NA	0.55	0.02828	4	2
Q9BTE3	396	MCMBP	Q9BTE3_396	MCMBP_HUMAN Mini-chromosome maintenance complex-binding protein OS=Homo sapiens OX=9606 GN=MCMBP PE=1 SV=2	FTVNLSGC(BTD[C])PR|	1|	0.55|	NA|	0.55	NA	1	1
Q9NT62	182	ATG3	Q9NT62_182	ATG3_HUMAN Ubiquitin-like-conjugating enzyme ATG3 OS=Homo sapiens OX=9606 GN=ATG3 PE=1 SV=1	|KIVEAC(BTD[C])K	|1	|0.55	|NA	0.55	NA	1	1
Q9NYF8	242	BCLAF1	Q9NYF8_242	BCLF1_HUMAN Bcl-2-associated transcription factor 1 OS=Homo sapiens OX=9606 GN=BCLAF1 PE=1 SV=2	SPHSPSPIATPPSQSSSC(BTD[C])SDAPMLSTVHSAK|SPHSPSPIATPPSQSSSC(BTD[C])SDAPMLSTVHSAK	1|2	0.52|0.575	NA|0.02121	0.5475	0.03889	3	2
P50990	36	CCT8	P50990_36	TCPQ_HUMAN T-complex protein 1 subunit theta OS=Homo sapiens OX=9606 GN=CCT8 PE=1 SV=4	|NIQAC(BTD[C])K	|2	|0.545	|0.13435	0.545	NA	2	1
P60900	47	PSMA6	P60900_47	PSA6_HUMAN Proteasome subunit alpha type-6 OS=Homo sapiens OX=9606 GN=PSMA6 PE=1 SV=1	GKDC(BTD[C])AVIVTQK|GKDC(BTD[C])AVIVTQK	1|3	0.51|0.58	NA|0.01732	0.545	0.0495	4	2
P62701	181	RPS4X	P62701_181	RS4X_HUMAN 40S ribosomal protein S4, X isoform OS=Homo sapiens OX=9606 GN=RPS4X PE=1 SV=2	FDTGNLC(BTD[C])MVTGGANLGR|FDTGNLC(BTD[C])MVTGGANLGR	1|1	0.61|0.48	NA|NA	0.545	0.09192	2	2
Q15370	60	ELOB	Q15370_60	ELOB_HUMAN Elongin-B OS=Homo sapiens OX=9606 GN=ELOB PE=1 SV=1	TLGEC(BTD[C])GFTSQTAR|TLGEC(BTD[C])GFTSQTAR	1|1	0.5|0.59	NA|NA	0.545	0.06364	2	2
Q16851	123	UGP2	Q16851_123	UGPA_HUMAN UTP--glucose-1-phosphate uridylyltransferase OS=Homo sapiens OX=9606 GN=UGP2 PE=1 SV=5	LNGGLGTSMGC(BTD[C])K|LNGGLGTSMGC(BTD[C])K	1|2	0.64|0.45	NA|0.02828	0.545	0.13435	3	2
P13639	41	EEF2	P13639_41	EF2_HUMAN Elongation factor 2 OS=Homo sapiens OX=9606 GN=EEF2 PE=1 SV=4	STLTDSLVC(BTD[C])K|STLTDSLVC(BTD[C])K	2|2	0.555|0.53	0.00707|0.0	0.5425	0.01768	4	2
O00116	541	AGPS	O00116_541	ADAS_HUMAN Alkyldihydroxyacetonephosphate synthase, peroxisomal OS=Homo sapiens OX=9606 GN=AGPS PE=1 SV=1	VVDLC(BTD[C])R|VVDLC(BTD[C])R	2|1	0.48|0.6	0.0|NA	0.54	0.08485	3	2
O00116	226	AGPS	O00116_226	ADAS_HUMAN Alkyldihydroxyacetonephosphate synthase, peroxisomal OS=Homo sapiens OX=9606 GN=AGPS PE=1 SV=1	|IVNLAC(BTD[C])K	|1	|0.54	|NA	0.54	NA	1	1
P00492	106	HPRT1	P00492_106	HPRT_HUMAN Hypoxanthine-guanine phosphoribosyltransferase OS=Homo sapiens OX=9606 GN=HPRT1 PE=1 SV=2	|SYC(BTD[C])NDQSTGDIK	|3	|0.54	|0.03464	0.54	NA	3	1
P15291	172	B4GALT1	P15291_172	B4GT1_HUMAN Beta-1,4-galactosyltransferase 1 OS=Homo sapiens OX=9606 GN=B4GALT1 PE=1 SV=5	|DC(BTD[C])VSPHK	|1	|0.54	|NA	0.54	NA	1	1
P30566	266	ADSL	P30566_266	PUR8_HUMAN Adenylosuccinate lyase OS=Homo sapiens OX=9606 GN=ADSL PE=1 SV=2	IC(BTD[C])TDIR|	1|	0.54|	NA|	0.54	NA	1	1
P42684	415	ABL2	P42684_415	ABL2_HUMAN Tyrosine-protein kinase ABL2 OS=Homo sapiens OX=9606 GN=ABL2 PE=1 SV=1	NC(BTD[C])LVGENHVVK|	1|	0.54|	NA|	0.54	NA	1	1
P43246	843	MSH2	P43246_843	MSH2_HUMAN DNA mismatch repair protein Msh2 OS=Homo sapiens OX=9606 GN=MSH2 PE=1 SV=1	|HVIEC(BTD[C])AK	|2	|0.54	|0.22627	0.54	NA	2	1
Q00839	335	HNRNPU	Q00839_335	HNRPU_HUMAN Heterogeneous nuclear ribonucleoprotein U OS=Homo sapiens OX=9606 GN=HNRNPU PE=1 SV=6	GKVC(BTD[C])FEMK|GKVC(BTD[C])FEMK	1|3	0.57|0.51	NA|0.18717	0.54	0.04243	4	2
Q01433	123	AMPD2	Q01433_123	AMPD2_HUMAN AMP deaminase 2 OS=Homo sapiens OX=9606 GN=AMPD2 PE=1 SV=2	TSMDGKC(BTD[C])K|TSMDGKC(BTD[C])K	1|1	0.43|0.65	NA|NA	0.54	0.15556	2	2
Q01813	112	PFKP	Q01813_112	PFKAP_HUMAN ATP-dependent 6-phosphofructokinase, platelet type OS=Homo sapiens OX=9606 GN=PFKP PE=1 SV=2	AAC(BTD[C])NLLQR|	1|	0.54|	NA|	0.54	NA	1	1
Q13098	341	GPS1	Q13098_341	CSN1_HUMAN COP9 signalosome complex subunit 1 OS=Homo sapiens OX=9606 GN=GPS1 PE=1 SV=4	YASC(BTD[C])LK|	2|	0.54|	0.0|	0.54	NA	2	1
Q15942	387	ZYX	Q15942_387	ZYX_HUMAN Zyxin OS=Homo sapiens OX=9606 GN=ZYX PE=1 SV=1	|C(BTD[C])HQPLAR	|3	|0.54	|0.15308	0.54	NA	3	1
Q5JRX3	556	PITRM1	Q5JRX3_556	PREP_HUMAN Presequence protease, mitochondrial OS=Homo sapiens OX=9606 GN=PITRM1 PE=1 SV=3	|SQQSKPQDASC(BTD[C])LPALK	|1	|0.54	|NA	0.54	NA	1	1
Q8NC56	355	LEMD2	Q8NC56_355	LEMD2_HUMAN LEM domain-containing protein 2 OS=Homo sapiens OX=9606 GN=LEMD2 PE=1 SV=1	|VVC(BTD[C])LESAHPR	|2	|0.54	|0.0	0.54	NA	2	1
Q9Y490	1953	TLN1	Q9Y490_1953	TLN1_HUMAN Talin-1 OS=Homo sapiens OX=9606 GN=TLN1 PE=1 SV=3	|KELIEC(BTD[C])AR ELIEC(BTD[C])AR	|2	|0.54	|0.01414	0.54	NA	2	1
P02545	522	LMNA	P02545_522	LMNA_HUMAN Prelamin-A/C OS=Homo sapiens OX=9606 GN=LMNA PE=1 SV=1	AQNTWGC(BTD[C])GNSLR|AQNTWGC(BTD[C])GNSLR	1|3	0.51|0.56	NA|0.01155	0.535	0.03536	4	2
P13796	460	LCP1	P13796_460	PLSL_HUMAN Plastin-2 OS=Homo sapiens OX=9606 GN=LCP1 PE=1 SV=6	KIENC(BTD[C])NYAVELGK|KIENC(BTD[C])NYAVELGK	4|1	0.56|0.51	0.01155|NA	0.535	0.03536	5	2
P33240	150	CSTF2	P33240_150	CSTF2_HUMAN Cleavage stimulation factor subunit 2 OS=Homo sapiens OX=9606 GN=CSTF2 PE=1 SV=1	|LC(BTD[C])VQNSPQEAR	|2	|0.535	|0.13435	0.535	NA	2	1
P39023	157	RPL3	P39023_157	RL3_HUMAN 60S ribosomal protein L3 OS=Homo sapiens OX=9606 GN=RPL3 PE=1 SV=2	KYC(BTD[C])QVIR YC(BTD[C])QVIR|	4|	0.535|	0.19346|	0.535	NA	4	1
P60174	104	TPI1	P60174_104	TPIS_HUMAN Triosephosphate isomerase OS=Homo sapiens OX=9606 GN=TPI1 PE=1 SV=3	IAVAAQNC(BTD[C])YK|IAVAAQNC(BTD[C])YK	4|4	0.45|0.62	0.01826|0.21793	0.535	0.12021	8	2
Q8WWY3	149	PRPF31	Q8WWY3_149	PRP31_HUMAN U4/U6 small nuclear ribonucleoprotein Prp31 OS=Homo sapiens OX=9606 GN=PRPF31 PE=1 SV=2	|ELGNSLDKC(BTD[C])K	|2	|0.535	|0.28991	0.535	NA	2	1
P02786	363	TFRC	P02786_363	TFR1_HUMAN Transferrin receptor protein 1 OS=Homo sapiens OX=9606 GN=TFRC PE=1 SV=2	TDSTC(BTD[C])R|TDSTC(BTD[C])R	2|2	0.53|0.535	0.0|0.03536	0.5325	0.00354	4	2
P63000	105	RAC1	P63000_105	RAC1_HUMAN Ras-related C3 botulinum toxin substrate 1 OS=Homo sapiens OX=9606 GN=RAC1 PE=1 SV=1	HHC(BTD[C])PNTPIILVGTK|HHC(BTD[C])PNTPIILVGTK	2|1	0.505|0.56	0.14849|NA	0.5325	0.03889	3	2
O00567	211	NOP56	O00567_211	NOP56_HUMAN Nucleolar protein 56 OS=Homo sapiens OX=9606 GN=NOP56 PE=1 SV=4	IINDNATYC(BTD[C])R|	1|	0.53|	NA|	0.53	NA	1	1
O15143	70	ARPC1B	O15143_70	ARC1B_HUMAN Actin-related protein 2/3 complex subunit 1B OS=Homo sapiens OX=9606 GN=ARPC1B PE=1 SV=3	|IVTC(BTD[C])GTDR	|1	|0.53	|NA	0.53	NA	1	1
P27361	82	MAPK3	P27361_82	MK03_HUMAN Mitogen-activated protein kinase 3 OS=Homo sapiens OX=9606 GN=MAPK3 PE=1 SV=4	ISPFEHQTYC(BTD[C])QR|	1|	0.53|	NA|	0.53	NA	1	1
P40937	238	RFC5	P40937_238	RFC5_HUMAN Replication factor C subunit 5 OS=Homo sapiens OX=9606 GN=RFC5 PE=1 SV=1	|VTEETVYTC(BTD[C])TGHPLK	|1	|0.53	|NA	0.53	NA	1	1
P43246	873	MSH2	P43246_873	MSH2_HUMAN DNA mismatch repair protein Msh2 OS=Homo sapiens OX=9606 GN=MSH2 PE=1 SV=1	KC(BTD[C])YLER|KC(BTD[C])YLER	1|1	0.54|0.52	NA|NA	0.53	0.01414	2	2
P45974	195	USP5	P45974_195	UBP5_HUMAN Ubiquitin carboxyl-terminal hydrolase 5 OS=Homo sapiens OX=9606 GN=USP5 PE=1 SV=2	IPPC(BTD[C])GWK|	1|	0.53|	NA|	0.53	NA	1	1
P50454	156	SERPINH1	P50454_156	SERPH_HUMAN Serpin H1 OS=Homo sapiens OX=9606 GN=SERPINH1 PE=1 SV=2	|QHYNC(BTD[C])EHSK	|2	|0.53	|0.0	0.53	NA	2	1
P56537	63	EIF6	P56537_63	IF6_HUMAN Eukaryotic translation initiation factor 6 OS=Homo sapiens OX=9606 GN=EIF6 PE=1 SV=1	|MC(BTD[C])VGNR	|3	|0.53	|0.03512	0.53	NA	3	1
P57088	204	TMEM33	P57088_204	TMM33_HUMAN Transmembrane protein 33 OS=Homo sapiens OX=9606 GN=TMEM33 PE=1 SV=2	RNPYC(BTD[C])R|	1|	0.53|	NA|	0.53	NA	1	1
P61158	408	ACTR3	P61158_408	ARP3_HUMAN Actin-related protein 3 OS=Homo sapiens OX=9606 GN=ACTR3 PE=1 SV=3	KDYEEIGPSIC(BTD[C])R|	1|	0.53|	NA|	0.53	NA	1	1
Q12797	641	ASPH	Q12797_641	ASPH_HUMAN Aspartyl/asparaginyl beta-hydroxylase OS=Homo sapiens OX=9606 GN=ASPH PE=1 SV=3	RNENAC(BTD[C])K|	1|	0.53|	NA|	0.53	NA	1	1
Q13200	779	PSMD2	Q13200_779	PSMD2_HUMAN 26S proteasome non-ATPase regulatory subunit 2 OS=Homo sapiens OX=9606 GN=PSMD2 PE=1 SV=3	GTLTLC(BTD[C])PYHSDR|	3|	0.53|	0.02887|	0.53	NA	3	1
Q14204	3940	DYNC1H1	Q14204_3940	DYHC1_HUMAN Cytoplasmic dynein 1 heavy chain 1 OS=Homo sapiens OX=9606 GN=DYNC1H1 PE=1 SV=5	|LSC(BTD[C])LPAFK	|1	|0.53	|NA	0.53	NA	1	1
Q14980	1930	NUMA1	Q14980_1930	NUMA1_HUMAN Nuclear mitotic apparatus protein 1 OS=Homo sapiens OX=9606 GN=NUMA1 PE=1 SV=2	VC(BTD[C])PPHLK|	1|	0.53|	NA|	0.53	NA	1	1
Q8TEX9	708	IPO4	Q8TEX9_708	IPO4_HUMAN Importin-4 OS=Homo sapiens OX=9606 GN=IPO4 PE=1 SV=2	|LLEC(BTD[C])PHLNVR	|2	|0.53	|0.0	0.53	NA	2	1
Q8WU90	180	ZC3H15	Q8WU90_180	ZC3HF_HUMAN Zinc finger CCCH domain-containing protein 15 OS=Homo sapiens OX=9606 GN=ZC3H15 PE=1 SV=1	|TQIVC(BTD[C])K	|1	|0.53	|NA	0.53	NA	1	1
Q96F07	144	CYFIP2	Q96F07_144	CYFP2_HUMAN Cytoplasmic FMR1-interacting protein 2 OS=Homo sapiens OX=9606 GN=CYFIP2 PE=1 SV=2	RLC(BTD[C])HAER|	1|	0.53|	NA|	0.53	NA	1	1
Q9H488	267	POFUT1	Q9H488_267	OFUT1_HUMAN GDP-fucose protein O-fucosyltransferase 1 OS=Homo sapiens OX=9606 GN=POFUT1 PE=1 SV=1	|DGTAGSHFMASPQC(BTD[C])VGYSR	|1	|0.53	|NA	0.53	NA	1	1
Q9UQ80	149	PA2G4	Q9UQ80_149	PA2G4_HUMAN Proliferation-associated protein 2G4 OS=Homo sapiens OX=9606 GN=PA2G4 PE=1 SV=3	|AAHLC(BTD[C])AEAALR	|1	|0.53	|NA	0.53	NA	1	1
P48643	181	CCT5	P48643_181	TCPE_HUMAN T-complex protein 1 subunit epsilon OS=Homo sapiens OX=9606 GN=CCT5 PE=1 SV=1	VVNSC(BTD[C])HR|VVNSC(BTD[C])HR	4|2	0.42|0.635	0.14245|0.41719	0.5275	0.15203	6	2
P30825	21	SLC7A1	P30825_21	CTR1_HUMAN High affinity cationic amino acid transporter 1 OS=Homo sapiens OX=9606 GN=SLC7A1 PE=1 SV=1	|KVVDC(BTD[C])SR	|2	|0.525	|0.0495	0.525	NA	2	1
P00338	131	LDHA	P00338_131	LDHA_HUMAN L-lactate dehydrogenase A chain OS=Homo sapiens OX=9606 GN=LDHA PE=1 SV=2	YSPNC(BTD[C])K|YSPNC(BTD[C])K	9|6	0.51|0.535	0.04604|0.10342	0.5225	0.01768	15	2
P49790	1065	NUP153	P49790_1065	NU153_HUMAN Nuclear pore complex protein Nup153 OS=Homo sapiens OX=9606 GN=NUP153 PE=1 SV=2	SASVAPFTC(BTD[C])K|SASVAPFTC(BTD[C])K	2|1	0.495|0.55	0.03536|NA	0.5225	0.03889	3	2
O60701	64	UGDH	O60701_64	UGDH_HUMAN UDP-glucose 6-dehydrogenase OS=Homo sapiens OX=9606 GN=UGDH PE=1 SV=1	EVVESC(BTD[C])R|	1|	0.52|	NA|	0.52	NA	1	1
P04843	545	RPN1	P04843_545	RPN1_HUMAN Dolichyl-diphosphooligosaccharide--protein glycosyltransferase subunit 1 OS=Homo sapiens OX=9606 GN=RPN1 PE=1 SV=1	LKTEGSDLC(BTD[C])DR|LKTEGSDLC(BTD[C])DR	1|3	0.53|0.51	NA|0.04619	0.52	0.01414	4	2
P18206	85	VCL	P18206_85	VINC_HUMAN Vinculin OS=Homo sapiens OX=9606 GN=VCL PE=1 SV=4	VENAC(BTD[C])TK|VENAC(BTD[C])TK	2|1	0.58|0.46	0.11314|NA	0.52	0.08485	3	2
P26885	42	FKBP2	P26885_42	FKBP2_HUMAN Peptidyl-prolyl cis-trans isomerase FKBP2 OS=Homo sapiens OX=9606 GN=FKBP2 PE=1 SV=2	VDHC(BTD[C])PIK|VDHC(BTD[C])PIK	1|1	0.42|0.62	NA|NA	0.52	0.14142	2	2
P35998	236	PSMC2	P35998_236	PRS7_HUMAN 26S proteasome regulatory subunit 7 OS=Homo sapiens OX=9606 GN=PSMC2 PE=1 SV=3	|TDAC(BTD[C])FIR	|1	|0.52	|NA	0.52	NA	1	1
P49189	96	ALDH9A1	P49189_96	AL9A1_HUMAN 4-trimethylaminobutyraldehyde dehydrogenase OS=Homo sapiens OX=9606 GN=ALDH9A1 PE=1 SV=3	EREDEIATMEC(BTD[C])INNGK|	1|	0.52|	NA|	0.52	NA	1	1
P49327	1186	FASN	P49327_1186	FAS_HUMAN Fatty acid synthase OS=Homo sapiens OX=9606 GN=FASN PE=1 SV=3	LLSAAC(BTD[C])R|	1|	0.52|	NA|	0.52	NA	1	1
P61201	179	COPS2	P61201_179	CSN2_HUMAN COP9 signalosome complex subunit 2 OS=Homo sapiens OX=9606 GN=COPS2 PE=1 SV=1	|QLHQSC(BTD[C])QTDDGEDDLKK	|2	|0.52	|0.19799	0.52	NA	2	1
P63208	160	SKP1	P63208_160	SKP1_HUMAN S-phase kinase-associated protein 1 OS=Homo sapiens OX=9606 GN=SKP1 PE=1 SV=2	KENQWC(BTD[C])EEK|KENQWC(BTD[C])EEK	2|1	0.57|0.47	0.19799|NA	0.52	0.07071	3	2
P78527	111	PRKDC	P78527_111	PRKDC_HUMAN DNA-dependent protein kinase catalytic subunit OS=Homo sapiens OX=9606 GN=PRKDC PE=1 SV=3	NTC(BTD[C])TSVYTK|	1|	0.52|	NA|	0.52	NA	1	1
Q14315	1066	FLNC	Q14315_1066	FLNC_HUMAN Filamin-C OS=Homo sapiens OX=9606 GN=FLNC PE=1 SV=3	VC(BTD[C])AYGPGLK|	1|	0.52|	NA|	0.52	NA	1	1
Q14980	375	NUMA1	Q14980_375	NUMA1_HUMAN Nuclear mitotic apparatus protein 1 OS=Homo sapiens OX=9606 GN=NUMA1 PE=1 SV=2	|ELSAALQDKKC(BTD[C])LEEK	|1	|0.52	|NA	0.52	NA	1	1
Q86WQ0	76	NR2C2AP	Q86WQ0_76	NR2CA_HUMAN Nuclear receptor 2C2-associated protein OS=Homo sapiens OX=9606 GN=NR2C2AP PE=1 SV=1	GC(BTD[C])LEGSQGTQALHK|	1|	0.52|	NA|	0.52	NA	1	1
Q96L91	1775	EP400	Q96L91_1775	EP400_HUMAN E1A-binding protein p400 OS=Homo sapiens OX=9606 GN=EP400 PE=1 SV=4	IC(BTD[C])ALPSHGR|	1|	0.52|	NA|	0.52	NA	1	1
Q99439	164	CNN2	Q99439_164	CNN2_HUMAN Calponin-2 OS=Homo sapiens OX=9606 GN=CNN2 PE=1 SV=4	AGQC(BTD[C])VIGLQMGTNK|	3|	0.52|	0.06928|	0.52	NA	3	1
Q99497	53	PARK7	Q99497_53	PARK7_HUMAN Protein/nucleic acid deglycase DJ-1 OS=Homo sapiens OX=9606 GN=PARK7 PE=1 SV=2	DVVIC(BTD[C])PDASLEDAKK|	1|	0.52|	NA|	0.52	NA	1	1
Q9BPX3	202	NCAPG	Q9BPX3_202	CND3_HUMAN Condensin complex subunit 3 OS=Homo sapiens OX=9606 GN=NCAPG PE=1 SV=1	AVLSC(BTD[C])IAPSAK|	1|	0.52|	NA|	0.52	NA	1	1
Q9BWD1	360	ACAT2	Q9BWD1_360	THIC_HUMAN Acetyl-CoA acetyltransferase, cytosolic OS=Homo sapiens OX=9606 GN=ACAT2 PE=1 SV=2	VNIEGGAIALGHPLGASGC(BTD[C])R|VNIEGGAIALGHPLGASGC(BTD[C])R	1|1	0.51|0.53	NA|NA	0.52	0.01414	2	2
Q9H9J2	53	MRPL44	Q9H9J2_53	RM44_HUMAN 39S ribosomal protein L44, mitochondrial OS=Homo sapiens OX=9606 GN=MRPL44 PE=1 SV=1	LLRC(BTD[C])PPPPVR|	1|	0.52|	NA|	0.52	NA	1	1
P38646	608	HSPA9	P38646_608	GRP75_HUMAN Stress-70 protein, mitochondrial OS=Homo sapiens OX=9606 GN=HSPA9 PE=1 SV=2	DQLPADEC(BTD[C])NKLK MEEFKDQLPADEC(BTD[C])NKLK MEEFKDQLPADEC(BTD[C])NK|MEEFKDQLPADEC(BTD[C])NKLK MEEFKDQLPADEC(BTD[C])NK	4|7	0.555|0.48	0.10532|0.05598	0.5175	0.05303	11	2
O15355	241	PPM1G	O15355_241	PPM1G_HUMAN Protein phosphatase 1G OS=Homo sapiens OX=9606 GN=PPM1G PE=1 SV=1	GTEAGQVGEPGIPTGEAGPSC(BTD[C])SSASDK|GTEAGQVGEPGIPTGEAGPSC(BTD[C])SSASDK	1|1	0.49|0.54	NA|NA	0.515	0.03536	2	2
P09960	147	LTA4H	P09960_147	LKHA4_HUMAN Leukotriene A-4 hydrolase OS=Homo sapiens OX=9606 GN=LTA4H PE=1 SV=2	AILPC(BTD[C])QDTPSVK|AILPC(BTD[C])QDTPSVK	1|1	0.59|0.44	NA|NA	0.515	0.10607	2	2
P49207	83	RPL34	P49207_83	RL34_HUMAN 60S ribosomal protein L34 OS=Homo sapiens OX=9606 GN=RPL34 PE=1 SV=3	AYGGSMC(BTD[C])AK|AYGGSMC(BTD[C])AK	3|4	0.39|0.64	0.01732|0.08539	0.515	0.17678	7	2
P62937	52	PPIA	P62937_52	PPIA_HUMAN Peptidyl-prolyl cis-trans isomerase A OS=Homo sapiens OX=9606 GN=PPIA PE=1 SV=2	GSC(BTD[C])FHR|GSC(BTD[C])FHR	4|2	0.5|0.53	0.015|0.0	0.515	0.02121	6	2
Q00610	870	CLTC	Q00610_870	CLH1_HUMAN Clathrin heavy chain 1 OS=Homo sapiens OX=9606 GN=CLTC PE=1 SV=5	IHEGC(BTD[C])EEPATHNALAK|IHEGC(BTD[C])EEPATHNALAK	3|5	0.53|0.5	0.46285|0.03464	0.515	0.02121	8	2
Q09028	167	RBBP4	Q09028_167	RBBP4_HUMAN Histone-binding protein RBBP4 OS=Homo sapiens OX=9606 GN=RBBP4 PE=1 SV=3	HPSKPDPSGEC(BTD[C])NPDLR|HPSKPDPSGEC(BTD[C])NPDLR	1|1	0.61|0.42	NA|NA	0.515	0.13435	2	2
Q15029	674	EFTUD2	Q15029_674	U5S1_HUMAN 116 kDa U5 small nuclear ribonucleoprotein component OS=Homo sapiens OX=9606 GN=EFTUD2 PE=1 SV=1	C(BTD[C])FAETPNKK|C(BTD[C])FAETPNKK	3|2	0.43|0.6	0.00577|0.0	0.515	0.12021	5	2
Q9Y490	956	TLN1	Q9Y490_956	TLN1_HUMAN Talin-1 OS=Homo sapiens OX=9606 GN=TLN1 PE=1 SV=3	ASAGPQPLLVQSC(BTD[C])K|ASAGPQPLLVQSC(BTD[C])K	2|1	0.53|0.5	0.0|NA	0.515	0.02121	3	2
Q01518	416	CAP1	Q01518_416	CAP1_HUMAN Adenylyl cyclase-associated protein 1 OS=Homo sapiens OX=9606 GN=CAP1 PE=1 SV=5	TDGC(BTD[C])HAYLSK|TDGC(BTD[C])HAYLSK	3|4	0.5|0.525	0.05774|0.04041	0.5125	0.01768	7	2
Q02543	22	RPL18A	Q02543_22	RL18A_HUMAN 60S ribosomal protein L18a OS=Homo sapiens OX=9606 GN=RPL18A PE=1 SV=2	C(BTD[C])HTPPLYR|C(BTD[C])HTPPLYR	8|2	0.47|0.555	0.12759|0.09192	0.5125	0.0601	10	2
O43264	404	ZW10	O43264_404	ZW10_HUMAN Centromere/kinetochore protein zw10 homolog OS=Homo sapiens OX=9606 GN=ZW10 PE=1 SV=3	KC(BTD[C])QDVIVAAR|KC(BTD[C])QDVIVAAR	2|4	0.545|0.475	0.0495|0.06652	0.51	0.0495	6	2
O95782	171	AP2A1	O95782_171	AP2A1_HUMAN AP-2 complex subunit alpha-1 OS=Homo sapiens OX=9606 GN=AP2A1 PE=1 SV=3	QSAALC(BTD[C])LLR|	1|	0.51|	NA|	0.51	NA	1	1
P17812	491	CTPS1	P17812_491	PYRG1_HUMAN CTP synthase 1 OS=Homo sapiens OX=9606 GN=CTPS1 PE=1 SV=2	KC(BTD[C])LEEQGLK|KC(BTD[C])LEEQGLK	2|3	0.38|0.64	0.0|0.13856	0.51	0.18385	5	2
P18206	422	VCL	P18206_422	VINC_HUMAN Vinculin OS=Homo sapiens OX=9606 GN=VCL PE=1 SV=4	|IAELC(BTD[C])DDPKER	|1	|0.51	|NA	0.51	NA	1	1
P39023	253	RPL3	P39023_253	RL3_HUMAN 60S ribosomal protein L3 OS=Homo sapiens OX=9606 GN=RPL3 PE=1 SV=2	VAC(BTD[C])IGAWHPAR|	1|	0.51|	NA|	0.51	NA	1	1
P41250	211	GARS	P41250_211	GARS_HUMAN Glycine--tRNA ligase OS=Homo sapiens OX=9606 GN=GARS PE=1 SV=3	NGEC(BTD[C])FR|NGEC(BTD[C])FR	2|1	0.6|0.42	0.0|NA	0.51	0.12728	3	2
P42704	863	LRPPRC	P42704_863	LPPRC_HUMAN Leucine-rich PPR motif-containing protein, mitochondrial OS=Homo sapiens OX=9606 GN=LRPPRC PE=1 SV=3	IHDVLC(BTD[C])K|	1|	0.51|	NA|	0.51	NA	1	1
Q13263	232	TRIM28	Q13263_232	TIF1B_HUMAN Transcription intermediary factor 1-beta OS=Homo sapiens OX=9606 GN=TRIM28 PE=1 SV=5	DC(BTD[C])QLNAHK|DC(BTD[C])QLNAHK	3|3	0.45|0.57	0.25697|0.18448	0.51	0.08485	6	2
Q13547	408	HDAC1	Q13547_408	HDAC1_HUMAN Histone deacetylase 1 OS=Homo sapiens OX=9606 GN=HDAC1 PE=1 SV=1	|ISIC(BTD[C])SSDKR	|3	|0.51	|0.1464	0.51	NA	3	1
Q13951	48	CBFB	Q13951_48	PEBB_HUMAN Core-binding factor subunit beta OS=Homo sapiens OX=9606 GN=CBFB PE=1 SV=2	FQNAC(BTD[C])R|	1|	0.51|	NA|	0.51	NA	1	1
Q4KMQ2	337	ANO6	Q4KMQ2_337	ANO6_HUMAN Anoctamin-6 OS=Homo sapiens OX=9606 GN=ANO6 PE=1 SV=2	|EVC(BTD[C])HPDIGGK	|1	|0.51	|NA	0.51	NA	1	1
Q8TD55	135	PLEKHO2	Q8TD55_135	PKHO2_HUMAN Pleckstrin homology domain-containing family O member 2 OS=Homo sapiens OX=9606 GN=PLEKHO2 PE=1 SV=1	SC(BTD[C])ALEHVTR|	1|	0.51|	NA|	0.51	NA	1	1
Q92797	578	SYMPK	Q92797_578	SYMPK_HUMAN Symplekin OS=Homo sapiens OX=9606 GN=SYMPK PE=1 SV=2	|AVAC(BTD[C])SGAAQVR	|1	|0.51	|NA	0.51	NA	1	1
Q9BXP5	412	SRRT	Q9BXP5_412	SRRT_HUMAN Serrate RNA effector molecule homolog OS=Homo sapiens OX=9606 GN=SRRT PE=1 SV=1	DAAGLEC(BTD[C])KPR|DAAGLEC(BTD[C])KPR DAAGLEC(BTD[C])K	2|2	0.53|0.49	0.0|0.14142	0.51	0.02828	4	2
Q9UMR2	393	DDX19B	Q9UMR2_393	DD19B_HUMAN ATP-dependent RNA helicase DDX19B OS=Homo sapiens OX=9606 GN=DDX19B PE=1 SV=1	|VLVTTNVC(BTD[C])AR	|1	|0.51	|NA	0.51	NA	1	1
Q9UNF0	163	PACSIN2	Q9UNF0_163	PACN2_HUMAN Protein kinase C and casein kinase substrate in neurons protein 2 OS=Homo sapiens OX=9606 GN=PACSIN2 PE=1 SV=2	|AHHAAC(BTD[C])K	|1	|0.51	|NA	0.51	NA	1	1
Q9UNM6	114	PSMD13	Q9UNM6_114	PSD13_HUMAN 26S proteasome non-ATPase regulatory subunit 13 OS=Homo sapiens OX=9606 GN=PSMD13 PE=1 SV=2	|SSDEAVILC(BTD[C])K	|1	|0.51	|NA	0.51	NA	1	1
P19367	834	HK1	P19367_834	HXK1_HUMAN Hexokinase-1 OS=Homo sapiens OX=9606 GN=HK1 PE=1 SV=3	AAQLC(BTD[C])GAGMAAVVDK|AAQLC(BTD[C])GAGMAAVVDK	2|2	0.415|0.6	0.0495|0.19799	0.5075	0.13081	4	2
Q96FV9	49	THOC1	Q96FV9_49	THOC1_HUMAN THO complex subunit 1 OS=Homo sapiens OX=9606 GN=THOC1 PE=1 SV=1	KC(BTD[C])TLDQAFR|KC(BTD[C])TLDQAFR	1|2	0.46|0.55	NA|0.0	0.505	0.06364	3	2
Q96TA1	512	NIBAN2	Q96TA1_512	NIBA2_HUMAN Protein Niban 2 OS=Homo sapiens OX=9606 GN=NIBAN2 PE=1 SV=3	|KLAPTC(BTD[C])K LAPTC(BTD[C])K	|2	|0.505	|0.26163	0.505	NA	2	1
Q99575	959	POP1	Q99575_959	POP1_HUMAN Ribonucleases P/MRP protein subunit POP1 OS=Homo sapiens OX=9606 GN=POP1 PE=1 SV=2	VTLHC(BTD[C])SR|VTLHC(BTD[C])SR	1|3	0.59|0.42	NA|0.03215	0.505	0.12021	4	2
Q9BR76	475	CORO1B	Q9BR76_475	COR1B_HUMAN Coronin-1B OS=Homo sapiens OX=9606 GN=CORO1B PE=1 SV=1	EQGDRIC(BTD[C])R|	2|	0.505|	0.02121|	0.505	NA	2	1
Q9BZL1	18	UBL5	Q9BZL1_18	UBL5_HUMAN Ubiquitin-like protein 5 OS=Homo sapiens OX=9606 GN=UBL5 PE=1 SV=1	|VKC(BTD[C])NTDDTIGDLKK VKC(BTD[C])NTDDTIGDLK	|2	|0.505	|0.00707	0.505	NA	2	1
P05198	218	EIF2S1	P05198_218	IF2A_HUMAN Eukaryotic translation initiation factor 2 subunit 1 OS=Homo sapiens OX=9606 GN=EIF2S1 PE=1 SV=3	AGLNC(BTD[C])STENMPIK|AGLNC(BTD[C])STENMPIK	2|5	0.525|0.48	0.09192|0.03362	0.5025	0.03182	7	2
P07237	312	P4HB	P07237_312	PDIA1_HUMAN Protein disulfide-isomerase OS=Homo sapiens OX=9606 GN=P4HB PE=1 SV=3	KEEC(BTD[C])PAVR|KEEC(BTD[C])PAVR EEC(BTD[C])PAVR	2|4	0.44|0.565	0.12728|0.24826	0.5025	0.08839	6	2
O00267	740	SUPT5H	O00267_740	SPT5H_HUMAN Transcription elongation factor SPT5 OS=Homo sapiens OX=9606 GN=SUPT5H PE=1 SV=1	VELHSTC(BTD[C])QTISVDR|	1|	0.5|	NA|	0.5	NA	1	1
O15067	606	PFAS	O15067_606	PUR4_HUMAN Phosphoribosylformylglycinamidine synthase OS=Homo sapiens OX=9606 GN=PFAS PE=1 SV=4	|IVLVDDREC(BTD[C])PVR	|2	|0.5	|0.12728	0.5	NA	2	1
O60287	1900	URB1	O60287_1900	NPA1P_HUMAN Nucleolar pre-ribosomal-associated protein 1 OS=Homo sapiens OX=9606 GN=URB1 PE=1 SV=4	|LC(BTD[C])QPSSQEPAKR	|1	|0.5	|NA	0.5	NA	1	1
O75718	84	CRTAP	O75718_84	CRTAP_HUMAN Cartilage-associated protein OS=Homo sapiens OX=9606 GN=CRTAP PE=1 SV=1	DSEAFC(BTD[C])HR|	1|	0.5|	NA|	0.5	NA	1	1
P17655	640	CAPN2	P17655_640	CAN2_HUMAN Calpain-2 catalytic subunit OS=Homo sapiens OX=9606 GN=CAPN2 PE=1 SV=6	MPC(BTD[C])QLHQVIVAR|	6|	0.5|	0.14473|	0.5	NA	6	1
P31350	317	RRM2	P31350_317	RIR2_HUMAN Ribonucleoside-diphosphate reductase subunit M2 OS=Homo sapiens OX=9606 GN=RRM2 PE=1 SV=1	LIGMNC(BTD[C])TLMK|LIGMNC(BTD[C])TLMK	1|2	0.53|0.47	NA|0.0	0.5	0.04243	3	2
P35221	337	CTNNA1	P35221_337	CTNA1_HUMAN Catenin alpha-1 OS=Homo sapiens OX=9606 GN=CTNNA1 PE=1 SV=1	|IVAEC(BTD[C])NAVR	|1	|0.5	|NA	0.5	NA	1	1
P35250	255	RFC2	P35250_255	RFC2_HUMAN Replication factor C subunit 2 OS=Homo sapiens OX=9606 GN=RFC2 PE=1 SV=3	VC(BTD[C])DEPHPLLVK|	1|	0.5|	NA|	0.5	NA	1	1
P46060	152	RANGAP1	P46060_152	RAGP1_HUMAN Ran GTPase-activating protein 1 OS=Homo sapiens OX=9606 GN=RANGAP1 PE=1 SV=1	LNNC(BTD[C])GMGIGGGK|LNNC(BTD[C])GMGIGGGK	3|2	0.56|0.44	0.07506|0.01414	0.5	0.08485	5	2
P55060	272	CSE1L	P55060_272	XPO2_HUMAN Exportin-2 OS=Homo sapiens OX=9606 GN=CSE1L PE=1 SV=3	SQIC(BTD[C])DNAALYAQK|SQIC(BTD[C])DNAALYAQK	2|4	0.545|0.455	0.02121|0.07506	0.5	0.06364	6	2
P60981	23	DSTN	P60981_23	DEST_HUMAN Destrin OS=Homo sapiens OX=9606 GN=DSTN PE=1 SV=3	C(BTD[C])STPEEIKK KC(BTD[C])STPEEIK|C(BTD[C])STPEEIKK KC(BTD[C])STPEEIK	4|5	0.39|0.61	0.08221|0.10756	0.5	0.15556	9	2
Q14847	53	LASP1	Q14847_53	LASP1_HUMAN LIM and SH3 domain protein 1 OS=Homo sapiens OX=9606 GN=LASP1 PE=1 SV=2	KPYC(BTD[C])NAHYPK|	1|	0.5|	NA|	0.5	NA	1	1
Q4G0F5	334	VPS26B	Q4G0F5_334	VP26B_HUMAN Vacuolar protein sorting-associated protein 26B OS=Homo sapiens OX=9606 GN=VPS26B PE=1 SV=2	|TPSQLSDNNC(BTD[C])R	|1	|0.5	|NA	0.5	NA	1	1
Q71UM5	77	RPS27L	Q71UM5_77	RS27L_HUMAN 40S ribosomal protein S27-like OS=Homo sapiens OX=9606 GN=RPS27L PE=1 SV=3	LTEGC(BTD[C])SFR|	3|	0.5|	0.05774|	0.5	NA	3	1
Q93008	1061	USP9X	Q93008_1061	USP9X_HUMAN Probable ubiquitin carboxyl-terminal hydrolase FAF-X OS=Homo sapiens OX=9606 GN=USP9X PE=1 SV=3	AIC(BTD[C])LDHAK|	2|	0.5|	0.0|	0.5	NA	2	1
Q9H845	271	ACAD9	Q9H845_271	ACAD9_HUMAN Complex I assembly factor ACAD9, mitochondrial OS=Homo sapiens OX=9606 GN=ACAD9 PE=1 SV=1	GSNTC(BTD[C])EVHFENTK|	1|	0.5|	NA|	0.5	NA	1	1
Q9NX63	112	CHCHD3	Q9NX63_112	MIC19_HUMAN MICOS complex subunit MIC19 OS=Homo sapiens OX=9606 GN=CHCHD3 PE=1 SV=1	ERIC(BTD[C])SEEER|	1|	0.5|	NA|	0.5	NA	1	1
Q9UEW8	99	STK39	Q9UEW8_99	STK39_HUMAN STE20/SPS1-related proline-alanine-rich protein kinase OS=Homo sapiens OX=9606 GN=STK39 PE=1 SV=3	INLEKC(BTD[C])QTSMDELLK|	1|	0.5|	NA|	0.5	NA	1	1
O75521	368	ECI2	O75521_368	ECI2_HUMAN Enoyl-CoA delta isomerase 2, mitochondrial OS=Homo sapiens OX=9606 GN=ECI2 PE=1 SV=4	LHAVNAEEC(BTD[C])NVLQGR|LHAVNAEEC(BTD[C])NVLQGR	1|1	0.44|0.55	NA|NA	0.495	0.07778	2	2
P18206	1040	VCL	P18206_1040	VINC_HUMAN Vinculin OS=Homo sapiens OX=9606 GN=VCL PE=1 SV=4	QC(BTD[C])TDKR|QC(BTD[C])TDKR	1|2	0.46|0.53	NA|0.0	0.495	0.0495	3	2
P42704	113	LRPPRC	P42704_113	LPPRC_HUMAN Leucine-rich PPR motif-containing protein, mitochondrial OS=Homo sapiens OX=9606 GN=LRPPRC PE=1 SV=3	VFNDTC(BTD[C])R|VFNDTC(BTD[C])R	2|2	0.56|0.43	0.0|0.0	0.495	0.09192	4	2
P61247	111	RPS3A	P61247_111	RS3A_HUMAN 40S ribosomal protein S3a OS=Homo sapiens OX=9606 GN=RPS3A PE=1 SV=2	DKMC(BTD[C])SMVK MC(BTD[C])SMVK|DKMC(BTD[C])SMVK MC(BTD[C])SMVK	14|18	0.54|0.45	0.17987|0.14935	0.495	0.06364	32	2
Q09666	2806	AHNAK	Q09666_2806	AHNK_HUMAN Neuroblast differentiation-associated protein AHNAK OS=Homo sapiens OX=9606 GN=AHNAK PE=1 SV=2	VDVEC(BTD[C])PDVNIEGPEGK|VDVEC(BTD[C])PDVNIEGPEGK	1|1	0.48|0.51	NA|NA	0.495	0.02121	2	2
Q13617	266	CUL2	Q13617_266	CUL2_HUMAN Cullin-2 OS=Homo sapiens OX=9606 GN=CUL2 PE=1 SV=2	VIHEC(BTD[C])QQR|VIHEC(BTD[C])QQR	5|2	0.53|0.46	0.06504|0.0	0.495	0.0495	7	2
Q14008	637	CKAP5	Q14008_637	CKAP5_HUMAN Cytoskeleton-associated protein 5 OS=Homo sapiens OX=9606 GN=CKAP5 PE=1 SV=3	TEMPC(BTD[C])QALVR|TEMPC(BTD[C])QALVR	2|1	0.45|0.54	0.12728|NA	0.495	0.06364	3	2
Q14573	1236	ITPR3	Q14573_1236	ITPR3_HUMAN Inositol 1,4,5-trisphosphate receptor type 3 OS=Homo sapiens OX=9606 GN=ITPR3 PE=1 SV=2	FC(BTD[C])AGNPGNQALLHK|FC(BTD[C])AGNPGNQALLHK	1|1	0.48|0.51	NA|NA	0.495	0.02121	2	2
P62877	94	RBX1	P62877_94	RBX1_HUMAN E3 ubiquitin-protein ligase RBX1 OS=Homo sapiens OX=9606 GN=RBX1 PE=1 SV=1	QVC(BTD[C])PLDNR|QVC(BTD[C])PLDNR	2|1	0.505|0.48	0.2192|NA	0.4925	0.01768	3	2
O14617	574	AP3D1	O14617_574	AP3D1_HUMAN AP-3 complex subunit delta-1 OS=Homo sapiens OX=9606 GN=AP3D1 PE=1 SV=1	ASC(BTD[C])ILQLVK|	1|	0.49|	NA|	0.49	NA	1	1
O14964	75	HGS	O14964_75	HGS_HUMAN Hepatocyte growth factor-regulated tyrosine kinase substrate OS=Homo sapiens OX=9606 GN=HGS PE=1 SV=1	NC(BTD[C])GQTVHDEVANK|NC(BTD[C])GQTVHDEVANK	2|2	0.47|0.51	0.0|0.0	0.49	0.02828	4	2
O75390	101	CS	O75390_101	CISY_HUMAN Citrate synthase, mitochondrial OS=Homo sapiens OX=9606 GN=CS PE=1 SV=2	GFSIPEC(BTD[C])QK|GFSIPEC(BTD[C])QK	2|1	0.51|0.47	0.15556|NA	0.49	0.02828	3	2
O95235	762	KIF20A	O95235_762	KI20A_HUMAN Kinesin-like protein KIF20A OS=Homo sapiens OX=9606 GN=KIF20A PE=1 SV=1	|AC(BTD[C])CHSTGAGK	|1	|0.49	|NA	0.49	NA	1	1
P11279	338	LAMP1	P11279_338	LAMP1_HUMAN Lysosome-associated membrane glycoprotein 1 OS=Homo sapiens OX=9606 GN=LAMP1 PE=1 SV=3	C(BTD[C])NAEEHVR ALQATVGNSYKC(BTD[C])NAEEHVR|	2|	0.49|	0.32527|	0.49	NA	2	1
P13489	362	RNH1	P13489_362	RINI_HUMAN Ribonuclease inhibitor OS=Homo sapiens OX=9606 GN=RNH1 PE=1 SV=2	ELC(BTD[C])QGLGQPGSVLR|	1|	0.49|	NA|	0.49	NA	1	1
P13995	145	MTHFD2	P13995_145	MTDC_HUMAN Bifunctional methylenetetrahydrofolate dehydrogenase/cyclohydrolase, mitochondrial OS=Homo sapiens OX=9606 GN=MTHFD2 PE=1 SV=2	RIC(BTD[C])NAVSPDK|	1|	0.49|	NA|	0.49	NA	1	1
P23229	920	ITGA6	P23229_920	ITA6_HUMAN Integrin alpha-6 OS=Homo sapiens OX=9606 GN=ITGA6 PE=1 SV=5	|VTC(BTD[C])EPQK	|1	|0.49	|NA	0.49	NA	1	1
P31930	380	UQCRC1	P31930_380	QCR1_HUMAN Cytochrome b-c1 complex subunit 1, mitochondrial OS=Homo sapiens OX=9606 GN=UQCRC1 PE=1 SV=3	LC(BTD[C])TSATESEVAR|	1|	0.49|	NA|	0.49	NA	1	1
P31939	434	ATIC	P31939_434	PUR9_HUMAN Bifunctional purine biosynthesis protein PURH OS=Homo sapiens OX=9606 GN=ATIC PE=1 SV=3	YTQSNSVC(BTD[C])YAK|	1|	0.49|	NA|	0.49	NA	1	1
P46734	227	MAP2K3	P46734_227	MP2K3_HUMAN Dual specificity mitogen-activated protein kinase kinase 3 OS=Homo sapiens OX=9606 GN=MAP2K3 PE=1 SV=2	|TMDAGC(BTD[C])KPYMAPER	|1	|0.49	|NA	0.49	NA	1	1
P48426	343	PIP4K2A	P48426_343	PI42A_HUMAN Phosphatidylinositol 5-phosphate 4-kinase type-2 alpha OS=Homo sapiens OX=9606 GN=PIP4K2A PE=1 SV=2	C(BTD[C])HENSPR|	1|	0.49|	NA|	0.49	NA	1	1
P61026	124	RAB10	P61026_124	RAB10_HUMAN Ras-related protein Rab-10 OS=Homo sapiens OX=9606 GN=RAB10 PE=1 SV=1	MLLGNKC(BTD[C])DMDDKR|MLLGNKC(BTD[C])DMDDKR	1|1	0.49|0.49	NA|NA	0.49	0	2	2
Q00839	607	HNRNPU	Q00839_607	HNRPU_HUMAN Heterogeneous nuclear ribonucleoprotein U OS=Homo sapiens OX=9606 GN=HNRNPU PE=1 SV=6	KAVVVC(BTD[C])PK AVVVC(BTD[C])PK|KAVVVC(BTD[C])PK AVVVC(BTD[C])PKDEDYK	4|3	0.54|0.44	0.25145|0.04041	0.49	0.07071	7	2
Q14137	620	BOP1	Q14137_620	BOP1_HUMAN Ribosome biogenesis protein BOP1 OS=Homo sapiens OX=9606 GN=BOP1 PE=1 SV=2	LMPNC(BTD[C])K|LMPNC(BTD[C])K	3|2	0.48|0.5	0.02887|0.04243	0.49	0.01414	5	2
Q15365	109	PCBP1	Q15365_109	PCBP1_HUMAN Poly(rC)-binding protein 1 OS=Homo sapiens OX=9606 GN=PCBP1 PE=1 SV=2	|LVVPATQC(BTD[C])GSLIGK	|2	|0.49	|0.0	0.49	NA	2	1
Q5VZF2	43	MBNL2	Q5VZF2_43	MBNL2_HUMAN Muscleblind-like protein 2 OS=Homo sapiens OX=9606 GN=MBNL2 PE=1 SV=2	|SC(BTD[C])QVENGR	|1	|0.49	|NA	0.49	NA	1	1
Q7Z2W4	272	ZC3HAV1	Q7Z2W4_272	ZCCHV_HUMAN Zinc finger CCCH-type antiviral protein 1 OS=Homo sapiens OX=9606 GN=ZC3HAV1 PE=1 SV=3	SC(BTD[C])TPSPDQISHR|SC(BTD[C])TPSPDQISHR	2|1	0.45|0.53	0.0|NA	0.49	0.05657	3	2
Q8NFH3	222	NUP43	Q8NFH3_222	NUP43_HUMAN Nucleoporin Nup43 OS=Homo sapiens OX=9606 GN=NUP43 PE=1 SV=1	|VPLHC(BTD[C])VDR	|1	|0.49	|NA	0.49	NA	1	1
Q96QK1	156	VPS35	Q96QK1_156	VPS35_HUMAN Vacuolar protein sorting-associated protein 35 OS=Homo sapiens OX=9606 GN=VPS35 PE=1 SV=2	LLQC(BTD[C])TR|	2|	0.49|	0.0|	0.49	NA	2	1
Q9C0B1	472	FTO	Q9C0B1_472	FTO_HUMAN Alpha-ketoglutarate-dependent dioxygenase FTO OS=Homo sapiens OX=9606 GN=FTO PE=1 SV=3	TLPADQKPEC(BTD[C])R|	1|	0.49|	NA|	0.49	NA	1	1
Q9UQ35	2130	SRRM2	Q9UQ35_2130	SRRM2_HUMAN Serine/arginine repetitive matrix protein 2 OS=Homo sapiens OX=9606 GN=SRRM2 PE=1 SV=2	PSMSPTPLDRC(BTD[C])R|	1|	0.49|	NA|	0.49	NA	1	1
O00410	110	IPO5	O00410_110	IPO5_HUMAN Importin-5 OS=Homo sapiens OX=9606 GN=IPO5 PE=1 SV=4	KVC(BTD[C])DIAAELAR|KVC(BTD[C])DIAAELAR	1|2	0.45|0.52	NA|0.0	0.485	0.0495	3	2
O43747	47	AP1G1	O43747_47	AP1G1_HUMAN AP-1 complex subunit gamma-1 OS=Homo sapiens OX=9606 GN=AP1G1 PE=1 SV=5	EEDNTYRC(BTD[C])R|EEDNTYRC(BTD[C])R	1|1	0.46|0.51	NA|NA	0.485	0.03536	2	2
P36578	96	RPL4	P36578_96	RL4_HUMAN 60S ribosomal protein L4 OS=Homo sapiens OX=9606 GN=RPL4 PE=1 SV=5	SGQGAFGNMC(BTD[C])R|SGQGAFGNMC(BTD[C])R	8|5	0.49|0.48	0.05317|0.11692	0.485	0.00707	13	2
Q96DV4	143	MRPL38	Q96DV4_143	RM38_HUMAN 39S ribosomal protein L38, mitochondrial OS=Homo sapiens OX=9606 GN=MRPL38 PE=1 SV=2	TC(BTD[C])GPYHK|TC(BTD[C])GPYHK	1|3	0.5|0.47	NA|0.00577	0.485	0.02121	4	2
Q96L21	105	RPL10L	Q96L21_105	RL10L_HUMAN 60S ribosomal protein L10-like OS=Homo sapiens OX=9606 GN=RPL10L PE=1 SV=3	MLSC(BTD[C])AGADR|MLSC(BTD[C])AGADR	5|5	0.46|0.51	0.02168|0.27718	0.485	0.03536	10	2
Q9ULA0	144	DNPEP	Q9ULA0_144	DNPEP_HUMAN Aspartyl aminopeptidase OS=Homo sapiens OX=9606 GN=DNPEP PE=1 SV=1	VIVKC(BTD[C])PTSGR|VIVKC(BTD[C])PTSGR	1|1	0.44|0.53	NA|NA	0.485	0.06364	2	2
A0A0B4J2D5	153	GATD3B	A0A0B4J2D5_153	GAL3B_HUMAN Glutamine amidotransferase-like class 1 domain-containing protein 3B, mitochondrial OS=Homo sapiens OX=9606 GN=GATD3B PE=1 SV=1	NLSTFAVDGKDC(BTD[C])K|	1|	0.48|	NA|	0.48	NA	1	1
O00410	972	IPO5	O00410_972	IPO5_HUMAN Importin-5 OS=Homo sapiens OX=9606 GN=IPO5 PE=1 SV=4	TKENVNATENC(BTD[C])ISAVGK|TKENVNATENC(BTD[C])ISAVGK ENVNATENC(BTD[C])ISAVGK	1|3	0.51|0.45	NA|0.18771	0.48	0.04243	4	2
O14613	92	CDC42EP2	O14613_92	BORG1_HUMAN Cdc42 effector protein 2 OS=Homo sapiens OX=9606 GN=CDC42EP2 PE=1 SV=1	|TATVC(BTD[C])GR	|1	|0.48	|NA	0.48	NA	1	1
O75083	325	WDR1	O75083_325	WDR1_HUMAN WD repeat-containing protein 1 OS=Homo sapiens OX=9606 GN=WDR1 PE=1 SV=4	SIQC(BTD[C])LTVHK|	2|	0.48|	0.0|	0.48	NA	2	1
O75116	804	ROCK2	O75116_804	ROCK2_HUMAN Rho-associated protein kinase 2 OS=Homo sapiens OX=9606 GN=ROCK2 PE=1 SV=4	RC(BTD[C])LTQNDLK|RC(BTD[C])LTQNDLK	1|1	0.52|0.44	NA|NA	0.48	0.05657	2	2
P12956	398	XRCC6	P12956_398	XRCC6_HUMAN X-ray repair cross-complementing protein 6 OS=Homo sapiens OX=9606 GN=XRCC6 PE=1 SV=2	|EVAALC(BTD[C])R	|1	|0.48	|NA	0.48	NA	1	1
P17931	173	LGALS3	P17931_173	LEG3_HUMAN Galectin-3 OS=Homo sapiens OX=9606 GN=LGALS3 PE=1 SV=5	VIVC(BTD[C])NTK|VIVC(BTD[C])NTK	1|1	0.38|0.58	NA|NA	0.48	0.14142	2	2
P19174	247	PLCG1	P19174_247	PLCG1_HUMAN 1-phosphatidylinositol 4,5-bisphosphate phosphodiesterase gamma-1 OS=Homo sapiens OX=9606 GN=PLCG1 PE=1 SV=1	|AGERPELC(BTD[C])R	|1	|0.48	|NA	0.48	NA	1	1
P26640	41	VARS	P26640_41	SYVC_HUMAN Valine--tRNA ligase OS=Homo sapiens OX=9606 GN=VARS PE=1 SV=4	|IC(BTD[C])LQPPPTSR	|1	|0.48	|NA	0.48	NA	1	1
P29218	24	IMPA1	P29218_24	IMPA1_HUMAN Inositol monophosphatase 1 OS=Homo sapiens OX=9606 GN=IMPA1 PE=1 SV=1	QAGEVVC(BTD[C])EAIK|	1|	0.48|	NA|	0.48	NA	1	1
P47897	298	QARS	P47897_298	SYQ_HUMAN Glutamine--tRNA ligase OS=Homo sapiens OX=9606 GN=QARS PE=1 SV=1	ANNGIC(BTD[C])FLR|	1|	0.48|	NA|	0.48	NA	1	1
P47897	358	QARS	P47897_358	SYQ_HUMAN Glutamine--tRNA ligase OS=Homo sapiens OX=9606 GN=QARS PE=1 SV=1	|GLAYVC(BTD[C])HQR	|1	|0.48	|NA	0.48	NA	1	1
P49207	46	RPL34	P49207_46	RL34_HUMAN 60S ribosomal protein L34 OS=Homo sapiens OX=9606 GN=RPL34 PE=1 SV=3	SAC(BTD[C])GVCPGR|SAC(BTD[C])GVCPGR	1|2	0.41|0.55	NA|0.0	0.48	0.09899	3	2
P49368	455	CCT3	P49368_455	TCPG_HUMAN T-complex protein 1 subunit gamma OS=Homo sapiens OX=9606 GN=CCT3 PE=1 SV=4	TLIQNC(BTD[C])GASTIR|TLIQNC(BTD[C])GASTIR	5|1	0.51|0.45	0.52034|NA	0.48	0.04243	6	2
P55039	319	DRG2	P55039_319	DRG2_HUMAN Developmentally-regulated GTP-binding protein 2 OS=Homo sapiens OX=9606 GN=DRG2 PE=1 SV=1	|GASVEHVC(BTD[C])HR	|1	|0.48	|NA	0.48	NA	1	1
P55735	187	SEC13	P55735_187	SEC13_HUMAN Protein SEC13 homolog OS=Homo sapiens OX=9606 GN=SEC13 PE=1 SV=3	FASGGC(BTD[C])DNLIK|FASGGC(BTD[C])DNLIK	1|1	0.58|0.38	NA|NA	0.48	0.14142	2	2
Q15021	421	NCAPD2	Q15021_421	CND1_HUMAN Condensin complex subunit 1 OS=Homo sapiens OX=9606 GN=NCAPD2 PE=1 SV=3	|SVLVC(BTD[C])K	|2	|0.48	|0.0	0.48	NA	2	1
Q5T4S7	1900	UBR4	Q5T4S7_1900	UBR4_HUMAN E3 ubiquitin-protein ligase UBR4 OS=Homo sapiens OX=9606 GN=UBR4 PE=1 SV=1	|VAMC(BTD[C])VLSSPHGR	|1	|0.48	|NA	0.48	NA	1	1
Q9BY44	39	EIF2A	Q9BY44_39	EIF2A_HUMAN Eukaryotic translation initiation factor 2A OS=Homo sapiens OX=9606 GN=EIF2A PE=1 SV=3	ESGKNC(BTD[C])K|	1|	0.48|	NA|	0.48	NA	1	1
Q9HAU4	716	SMURF2	Q9HAU4_716	SMUF2_HUMAN E3 ubiquitin-protein ligase SMURF2 OS=Homo sapiens OX=9606 GN=SMURF2 PE=1 SV=1	|AHTC(BTD[C])FNR	|1	|0.48	|NA	0.48	NA	1	1
Q9UHB6	316	LIMA1	Q9UHB6_316	LIMA1_HUMAN LIM domain and actin-binding protein 1 OS=Homo sapiens OX=9606 GN=LIMA1 PE=1 SV=1	ENVPPGPEVC(BTD[C])ITHQEGEK|	1|	0.48|	NA|	0.48	NA	1	1
Q9UPN3	4906	MACF1	Q9UPN3_4906	MACF1_HUMAN Microtubule-actin cross-linking factor 1, isoforms 1/2/3/5 OS=Homo sapiens OX=9606 GN=MACF1 PE=1 SV=4	|LKDC(BTD[C])MQK	|2	|0.48	|0.07071	0.48	NA	2	1
Q9Y277	229	VDAC3	Q9Y277_229	VDAC3_HUMAN Voltage-dependent anion-selective channel protein 3 OS=Homo sapiens OX=9606 GN=VDAC3 PE=1 SV=1	|YMLDC(BTD[C])R	|1	|0.48	|NA	0.48	NA	1	1
P12004	62	PCNA	P12004_62	PCNA_HUMAN Proliferating cell nuclear antigen OS=Homo sapiens OX=9606 GN=PCNA PE=1 SV=1	SEGFDTYRC(BTD[C])DR|SEGFDTYRC(BTD[C])DR	3|2	0.45|0.505	0.04041|0.07778	0.4775	0.03889	5	2
O95373	504	IPO7	O95373_504	IPO7_HUMAN Importin-7 OS=Homo sapiens OX=9606 GN=IPO7 PE=1 SV=1	RC(BTD[C])LIDDR|RC(BTD[C])LIDDR	1|2	0.38|0.57	NA|0.0	0.475	0.13435	3	2
P38646	487	HSPA9	P38646_487	GRP75_HUMAN Stress-70 protein, mitochondrial OS=Homo sapiens OX=9606 GN=HSPA9 PE=1 SV=2	VC(BTD[C])QGER|VC(BTD[C])QGER	1|2	0.49|0.46	NA|0.0	0.475	0.02121	3	2
P45880	47	VDAC2	P45880_47	VDAC2_HUMAN Voltage-dependent anion-selective channel protein 2 OS=Homo sapiens OX=9606 GN=VDAC2 PE=1 SV=2	SC(BTD[C])SGVEFSTSGSSNTDTGK|TKSC(BTD[C])SGVEFSTSGSSNTDTGK	1|2	0.55|0.4	NA|0.07071	0.475	0.10607	3	2
P50416	742	CPT1A	P50416_742	CPT1A_HUMAN Carnitine O-palmitoyltransferase 1, liver isoform OS=Homo sapiens OX=9606 GN=CPT1A PE=1 SV=2	FSC(BTD[C])PETDSHR|FSC(BTD[C])PETDSHR	1|2	0.48|0.47	NA|0.0	0.475	0.00707	3	2
P52701	765	MSH6	P52701_765	MSH6_HUMAN DNA mismatch repair protein Msh6 OS=Homo sapiens OX=9606 GN=MSH6 PE=1 SV=2	VDTC(BTD[C])HTPFGK|VDTC(BTD[C])HTPFGK	1|3	0.45|0.5	NA|0.03464	0.475	0.03536	4	2
Q9Y383	36	LUC7L2	Q9Y383_36	LC7L2_HUMAN Putative RNA-binding protein Luc7-like 2 OS=Homo sapiens OX=9606 GN=LUC7L2 PE=1 SV=2	FSDDRVC(BTD[C])K|	2|	0.475|	0.19092|	0.475	NA	2	1
Q92841	431	DDX17	Q92841_431	DDX17_HUMAN Probable ATP-dependent RNA helicase DDX17 OS=Homo sapiens OX=9606 GN=DDX17 PE=1 SV=2	RRC(BTD[C])DDLTR RC(BTD[C])DDLTR|RRC(BTD[C])DDLTR RC(BTD[C])DDLTR	3|2	0.46|0.485	5.88656|0.19092	0.4725	0.01768	5	2
O00148	164	DDX39A	O00148_164	DX39A_HUMAN ATP-dependent RNA helicase DDX39A OS=Homo sapiens OX=9606 GN=DDX39A PE=1 SV=2	KNC(BTD[C])PHVVVGTPGR NC(BTD[C])PHVVVGTPGR|NC(BTD[C])PHVVVGTPGR	3|4	0.55|0.39	0.0866|0.005	0.47	0.11314	7	2
O00422	26	SAP18	O00422_26	SAP18_HUMAN Histone deacetylase complex subunit SAP18 OS=Homo sapiens OX=9606 GN=SAP18 PE=1 SV=1	TC(BTD[C])PLLLR|	1|	0.47|	NA|	0.47	NA	1	1
O75369	1326	FLNB	O75369_1326	FLNB_HUMAN Filamin-B OS=Homo sapiens OX=9606 GN=FLNB PE=1 SV=2	VAVTEGC(BTD[C])QPSR|	2|	0.47|	0.0|	0.47	NA	2	1
P13489	199	RNH1	P13489_199	RINI_HUMAN Ribonuclease inhibitor OS=Homo sapiens OX=9606 GN=RNH1 PE=1 SV=2	DSPC(BTD[C])QLEALK|	2|	0.47|	0.0|	0.47	NA	2	1
P17612	344	PRKACA	P17612_344	KAPCA_HUMAN cAMP-dependent protein kinase catalytic subunit alpha OS=Homo sapiens OX=9606 GN=PRKACA PE=1 SV=2	|VSINEKC(BTD[C])GK	|1	|0.47	|NA	0.47	NA	1	1
P62888	85	RPL30	P62888_85	RL30_HUMAN 60S ribosomal protein L30 OS=Homo sapiens OX=9606 GN=RPL30 PE=1 SV=2	|TGVHHYSGNNIELGTAC(BTD[C])GK	|1	|0.47	|NA	0.47	NA	1	1
P63244	182	RACK1	P63244_182	RACK1_HUMAN Receptor of activated protein C kinase 1 OS=Homo sapiens OX=9606 GN=RACK1 PE=1 SV=3	VWNLANC(BTD[C])K|VWNLANC(BTD[C])K	1|3	0.49|0.45	NA|0.02887	0.47	0.02828	4	2
Q01081	163	U2AF1	Q01081_163	U2AF1_HUMAN Splicing factor U2AF 35 kDa subunit OS=Homo sapiens OX=9606 GN=U2AF1 PE=1 SV=3	QYEMGEC(BTD[C])TR|	1|	0.47|	NA|	0.47	NA	1	1
Q13263	209	TRIM28	Q13263_209	TIF1B_HUMAN Transcription intermediary factor 1-beta OS=Homo sapiens OX=9606 GN=TRIM28 PE=1 SV=5	TVYC(BTD[C])NVHK|TVYC(BTD[C])NVHK	3|4	0.5|0.44	0.05774|0.015	0.47	0.04243	7	2
Q4G148	414	GXYLT1	Q4G148_414	GXLT1_HUMAN Glucoside xylosyltransferase 1 OS=Homo sapiens OX=9606 GN=GXYLT1 PE=1 SV=2	TVHTYC(BTD[C])GK|	1|	0.47|	NA|	0.47	NA	1	1
Q96RS6	376	NUDCD1	Q96RS6_376	NUDC1_HUMAN NudC domain-containing protein 1 OS=Homo sapiens OX=9606 GN=NUDCD1 PE=1 SV=2	|DSAQC(BTD[C])AAIAER	|2	|0.47	|0.08485	0.47	NA	2	1
Q96T23	329	RSF1	Q96T23_329	RSF1_HUMAN Remodeling and spacing factor 1 OS=Homo sapiens OX=9606 GN=RSF1 PE=1 SV=2	VEVKEC(BTD[C])R|	1|	0.47|	NA|	0.47	NA	1	1
Q99424	412	ACOX2	Q99424_412	ACOX2_HUMAN Peroxisomal acyl-coenzyme A oxidase 2 OS=Homo sapiens OX=9606 GN=ACOX2 PE=1 SV=1	AC(BTD[C])GGHGYSK|AC(BTD[C])GGHGYSK	1|2	0.56|0.38	NA|0.0	0.47	0.12728	3	2
Q99829	53	CPNE1	Q99829_53	CPNE1_HUMAN Copine-1 OS=Homo sapiens OX=9606 GN=CPNE1 PE=1 SV=1	|NC(BTD[C])SSPEFSK	|4	|0.47	|0.0	0.47	NA	4	1
Q9UHB9	173	SRP68	Q9UHB9_173	SRP68_HUMAN Signal recognition particle subunit SRP68 OS=Homo sapiens OX=9606 GN=SRP68 PE=1 SV=2	LC(BTD[C])ESNR|	1|	0.47|	NA|	0.47	NA	1	1
Q9UMS4	114	PRPF19	Q9UMS4_114	PRP19_HUMAN Pre-mRNA-processing factor 19 OS=Homo sapiens OX=9606 GN=PRPF19 PE=1 SV=1	QELSHALYQHDAAC(BTD[C])R|	1|	0.47|	NA|	0.47	NA	1	1
Q9Y3E5	86	PTRH2	Q9Y3E5_86	PTH2_HUMAN Peptidyl-tRNA hydrolase 2, mitochondrial OS=Homo sapiens OX=9606 GN=PTRH2 PE=1 SV=1	|VAAQC(BTD[C])SHAAVSAYK	|1	|0.47	|NA	0.47	NA	1	1
P36542	103	ATP5F1C	P36542_103	ATPG_HUMAN ATP synthase subunit gamma, mitochondrial OS=Homo sapiens OX=9606 GN=ATP5F1C PE=1 SV=1	GLC(BTD[C])GAIHSSIAK|GLC(BTD[C])GAIHSSIAK	1|1	0.42|0.51	NA|NA	0.465	0.06364	2	2
P48509	192	CD151	P48509_192	CD151_HUMAN CD151 antigen OS=Homo sapiens OX=9606 GN=CD151 PE=1 SV=3	TVVALC(BTD[C])GQR|TVVALC(BTD[C])GQR	1|2	0.49|0.44	NA|0.09899	0.465	0.03536	3	2
Q5SSJ5	359	HP1BP3	Q5SSJ5_359	HP1B3_HUMAN Heterochromatin protein 1-binding protein 3 OS=Homo sapiens OX=9606 GN=HP1BP3 PE=1 SV=1	|TC(BTD[C])STTALKK	|2	|0.465	|0.0495	0.465	NA	2	1
Q9H6S3	369	EPS8L2	Q9H6S3_369	ES8L2_HUMAN Epidermal growth factor receptor kinase substrate 8-like protein 2 OS=Homo sapiens OX=9606 GN=EPS8L2 PE=1 SV=2	SVSC(BTD[C])PLLSR|SVSC(BTD[C])PLLSR	2|2	0.44|0.49	0.05657|0.0	0.465	0.03536	4	2
Q9NR30	418	DDX21	Q9NR30_418	DDX21_HUMAN Nucleolar RNA helicase 2 OS=Homo sapiens OX=9606 GN=DDX21 PE=1 SV=5	C(BTD[C])HWTQR|C(BTD[C])HWTQR	1|2	0.47|0.46	NA|0.0	0.465	0.00707	3	2
Q13283	73	G3BP1	Q13283_73	G3BP1_HUMAN Ras GTPase-activating protein-binding protein 1 OS=Homo sapiens OX=9606 GN=G3BP1 PE=1 SV=1	VMSQNFTNC(BTD[C])HTK|VMSQNFTNC(BTD[C])HTK	4|3	0.515|0.41	0.20614|0.0	0.4625	0.07425	7	2
Q92556	411	ELMO1	Q92556_411	ELMO1_HUMAN Engulfment and cell motility protein 1 OS=Homo sapiens OX=9606 GN=ELMO1 PE=1 SV=2	HEC(BTD[C])PFGR|HEC(BTD[C])PFGR	1|2	0.58|0.345	NA|0.17678	0.4625	0.16617	3	2
Q9BQ67	235	GRWD1	Q9BQ67_235	GRWD1_HUMAN Glutamate-rich WD repeat-containing protein 1 OS=Homo sapiens OX=9606 GN=GRWD1 PE=1 SV=1	LLTGDC(BTD[C])QK|LLTGDC(BTD[C])QK	1|2	0.57|0.355	NA|0.09192	0.4625	0.15203	3	2
O00571	298	DDX3X	O00571_298	DDX3X_HUMAN ATP-dependent RNA helicase DDX3X OS=Homo sapiens OX=9606 GN=DDX3X PE=1 SV=3	|VRPC(BTD[C])VVYGGADIGQQIR	|1	|0.46	|NA	0.46	NA	1	1
O75369	1915	FLNB	O75369_1915	FLNB_HUMAN Filamin-B OS=Homo sapiens OX=9606 GN=FLNB PE=1 SV=2	RC(BTD[C])SQVK|RC(BTD[C])SQVK	1|1	0.41|0.51	NA|NA	0.46	0.07071	2	2
P13796	336	LCP1	P13796_336	PLSL_HUMAN Plastin-2 OS=Homo sapiens OX=9606 GN=LCP1 PE=1 SV=6	AEC(BTD[C])MLQQAER|AEC(BTD[C])MLQQAER	5|4	0.49|0.43	0.03464|0.07089	0.46	0.04243	9	2
P13804	68	ETFA	P13804_68	ETFA_HUMAN Electron transfer flavoprotein subunit alpha, mitochondrial OS=Homo sapiens OX=9606 GN=ETFA PE=1 SV=1	|VAQDLC(BTD[C])K	|2	|0.46	|0.0	0.46	NA	2	1
P23396	97	RPS3	P23396_97	RS3_HUMAN 40S ribosomal protein S3 OS=Homo sapiens OX=9606 GN=RPS3 PE=1 SV=2	GLC(BTD[C])AIAQAESLR|GLC(BTD[C])AIAQAESLR	4|3	0.53|0.39	0.01155|0.02887	0.46	0.09899	7	2
P27708	280	CAD	P27708_280	PYR1_HUMAN CAD protein OS=Homo sapiens OX=9606 GN=CAD PE=1 SV=3	|GHNQPC(BTD[C])LLVGSGR	|2	|0.46	|0.0	0.46	NA	2	1
P36578	208	RPL4	P36578_208	RL4_HUMAN 60S ribosomal protein L4 OS=Homo sapiens OX=9606 GN=RPL4 PE=1 SV=5	GPC(BTD[C])IIYNEDNGIIK|	1|	0.46|	NA|	0.46	NA	1	1
P46063	606	RECQL	P46063_606	RECQ1_HUMAN ATP-dependent DNA helicase Q1 OS=Homo sapiens OX=9606 GN=RECQL PE=1 SV=3	|AESSQTC(BTD[C])HSEQGDKK	|1	|0.46	|NA	0.46	NA	1	1
P49773	84	HINT1	P49773_84	HINT1_HUMAN Histidine triad nucleotide-binding protein 1 OS=Homo sapiens OX=9606 GN=HINT1 PE=1 SV=2	KC(BTD[C])AADLGLNK|KC(BTD[C])AADLGLNK	3|4	0.45|0.47	0.0|0.01915	0.46	0.01414	7	2
P54577	519	YARS	P54577_519	SYYC_HUMAN Tyrosine--tRNA ligase, cytoplasmic OS=Homo sapiens OX=9606 GN=YARS PE=1 SV=4	LGSISC(BTD[C])K|	1|	0.46|	NA|	0.46	NA	1	1
P55212	68	CASP6	P55212_68	CASP6_HUMAN Caspase-6 OS=Homo sapiens OX=9606 GN=CASP6 PE=1 SV=2	GTC(BTD[C])ADRDNLTR|	1|	0.46|	NA|	0.46	NA	1	1
P60903	62	S100A10	P60903_62	S10AA_HUMAN Protein S100-A10 OS=Homo sapiens OX=9606 GN=S100A10 PE=1 SV=2	|DLDQC(BTD[C])R	|1	|0.46	|NA	0.46	NA	1	1
P62424	199	RPL7A	P62424_199	RL7A_HUMAN 60S ribosomal protein L7a OS=Homo sapiens OX=9606 GN=RPL7A PE=1 SV=2	KTC(BTD[C])TTVAFTQVNSEDK TC(BTD[C])TTVAFTQVNSEDK|	2|	0.46|	0.16971|	0.46	NA	2	1
P62633	150	CNBP	P62633_150	CNBP_HUMAN Cellular nucleic acid-binding protein OS=Homo sapiens OX=9606 GN=CNBP PE=1 SV=1	CGETGHVAINC(BTD[C])SK|	1|	0.46|	NA|	0.46	NA	1	1
P62851	59	RPS25	P62851_59	RS25_HUMAN 40S ribosomal protein S25 OS=Homo sapiens OX=9606 GN=RPS25 PE=1 SV=1	|ATYDKLC(BTD[C])K	|4	|0.46	|0.04113	0.46	NA	4	1
Q09161	73	NCBP1	Q09161_73	NCBP1_HUMAN Nuclear cap-binding protein subunit 1 OS=Homo sapiens OX=9606 GN=NCBP1 PE=1 SV=1	LLC(BTD[C])TVAR|	1|	0.46|	NA|	0.46	NA	1	1
Q14204	1999	DYNC1H1	Q14204_1999	DYHC1_HUMAN Cytoplasmic dynein 1 heavy chain 1 OS=Homo sapiens OX=9606 GN=DYNC1H1 PE=1 SV=5	TSAPITC(BTD[C])ELLNK|TSAPITC(BTD[C])ELLNK	3|2	0.41|0.51	0.01155|0.0	0.46	0.07071	5	2
Q14315	2154	FLNC	Q14315_2154	FLNC_HUMAN Filamin-C OS=Homo sapiens OX=9606 GN=FLNC PE=1 SV=3	QAPSIATIGSTC(BTD[C])DLNLK|	1|	0.46|	NA|	0.46	NA	1	1
Q5JTH9	31	RRP12	Q5JTH9_31	RRP12_HUMAN RRP12-like protein OS=Homo sapiens OX=9606 GN=RRP12 PE=1 SV=2	|GHSSDSNPAIC(BTD[C])R	|1	|0.46	|NA	0.46	NA	1	1
Q8IY37	766	DHX37	Q8IY37_766	DHX37_HUMAN Probable ATP-dependent RNA helicase DHX37 OS=Homo sapiens OX=9606 GN=DHX37 PE=1 SV=1	|LSC(BTD[C])PITALGR	|1	|0.46	|NA	0.46	NA	1	1
Q8IZL8	522	PELP1	Q8IZL8_522	PELP1_HUMAN Proline-, glutamic acid- and leucine-rich protein 1 OS=Homo sapiens OX=9606 GN=PELP1 PE=1 SV=2	KGDSNANSDVC(BTD[C])AAALR|KGDSNANSDVC(BTD[C])AAALR	1|3	0.49|0.43	NA|0.25981	0.46	0.04243	4	2
Q93008	1724	USP9X	Q93008_1724	USP9X_HUMAN Probable ubiquitin carboxyl-terminal hydrolase FAF-X OS=Homo sapiens OX=9606 GN=USP9X PE=1 SV=3	|IC(BTD[C])QGCPHR	|1	|0.46	|NA	0.46	NA	1	1
Q96F07	98	CYFIP2	Q96F07_98	CYFP2_HUMAN Cytoplasmic FMR1-interacting protein 2 OS=Homo sapiens OX=9606 GN=CYFIP2 PE=1 SV=2	|AIPQVKC(BTD[C])NEQPNR	|1	|0.46	|NA	0.46	NA	1	1
Q99460	806	PSMD1	Q99460_806	PSMD1_HUMAN 26S proteasome non-ATPase regulatory subunit 1 OS=Homo sapiens OX=9606 GN=PSMD1 PE=1 SV=2	SNC(BTD[C])KPSTFAYPAPLEVPK|	1|	0.46|	NA|	0.46	NA	1	1
Q9BZG1	38	RAB34	Q9BZG1_38	RAB34_HUMAN Ras-related protein Rab-34 OS=Homo sapiens OX=9606 GN=RAB34 PE=1 SV=1	VTC(BTD[C])ACQEHR|	1|	0.46|	NA|	0.46	NA	1	1
Q9C0C2	1373	TNKS1BP1	Q9C0C2_1373	TB182_HUMAN 182 kDa tankyrase-1-binding protein OS=Homo sapiens OX=9606 GN=TNKS1BP1 PE=1 SV=4	EHGVGGVSQC(BTD[C])PEPGLR|	1|	0.46|	NA|	0.46	NA	1	1
Q9H832	100	UBE2Z	Q9H832_100	UBE2Z_HUMAN Ubiquitin-conjugating enzyme E2 Z OS=Homo sapiens OX=9606 GN=UBE2Z PE=1 SV=2	TAPQC(BTD[C])LLR|	1|	0.46|	NA|	0.46	NA	1	1
Q9NZ01	18	TECR	Q9NZ01_18	TECR_HUMAN Very-long-chain enoyl-CoA reductase OS=Homo sapiens OX=9606 GN=TECR PE=1 SV=1	|EKLC(BTD[C])FLDK	|1	|0.46	|NA	0.46	NA	1	1
Q9P0V9	22	SEPTIN10	Q9P0V9_22	SEP10_HUMAN Septin-10 OS=Homo sapiens OX=9606 GN=SEPTIN10 PE=1 SV=2	TTC(BTD[C])MSSQGSDDEQIKR|TTC(BTD[C])MSSQGSDDEQIKR	2|1	0.36|0.56	0.0|NA	0.46	0.14142	3	2
Q9UBS8	350	RNF14	Q9UBS8_350	RNF14_HUMAN E3 ubiquitin-protein ligase RNF14 OS=Homo sapiens OX=9606 GN=RNF14 PE=1 SV=1	|LTYHGVSPC(BTD[C])K	|1	|0.46	|NA	0.46	NA	1	1
Q9UHD8	248	SEPTIN9	Q9UHD8_248	SEPT9_HUMAN Septin-9 OS=Homo sapiens OX=9606 GN=SEPTIN9 PE=1 SV=2	SQEATEAAPSC(BTD[C])VGDMADTPR|	1|	0.46|	NA|	0.46	NA	1	1
Q9Y2A7	327	NCKAP1	Q9Y2A7_327	NCKP1_HUMAN Nck-associated protein 1 OS=Homo sapiens OX=9606 GN=NCKAP1 PE=1 SV=1	|INDIREC(BTD[C])K	|1	|0.46	|NA	0.46	NA	1	1
O14929	168	HAT1	O14929_168	HAT1_HUMAN Histone acetyltransferase type B catalytic subunit OS=Homo sapiens OX=9606 GN=HAT1 PE=1 SV=1	ADMTC(BTD[C])R|ADMTC(BTD[C])R	2|3	0.47|0.44	0.0|0.02887	0.455	0.02121	5	2
Q01082	112	SPTBN1	Q01082_112	SPTB2_HUMAN Spectrin beta chain, non-erythrocytic 1 OS=Homo sapiens OX=9606 GN=SPTBN1 PE=1 SV=2	IHC(BTD[C])LENVDK|IHC(BTD[C])LENVDK	3|5	0.44|0.47	0.29263|0.11082	0.455	0.02121	8	2
Q15233	145	NONO	Q15233_145	NONO_HUMAN Non-POU domain-containing octamer-binding protein OS=Homo sapiens OX=9606 GN=NONO PE=1 SV=4	FAC(BTD[C])HSASLTVR|FAC(BTD[C])HSASLTVR	1|1	0.45|0.46	NA|NA	0.455	0.00707	2	2
Q7Z2T5	132	TRMT1L	Q7Z2T5_132	TRM1L_HUMAN TRMT1-like protein OS=Homo sapiens OX=9606 GN=TRMT1L PE=1 SV=2	AC(BTD[C])NSHK|AC(BTD[C])NSHK	1|1	0.39|0.52	NA|NA	0.455	0.09192	2	2
Q9Y490	1087	TLN1	Q9Y490_1087	TLN1_HUMAN Talin-1 OS=Homo sapiens OX=9606 GN=TLN1 PE=1 SV=3	LKPLPGETMEKC(BTD[C])TQDLGNSTK|LKPLPGETMEKC(BTD[C])TQDLGNSTK	4|2	0.42|0.49	0.22368|0.0	0.455	0.0495	6	2
O00148	238	DDX39A	O00148_238	DX39A_HUMAN ATP-dependent RNA helicase DDX39A OS=Homo sapiens OX=9606 GN=DDX39A PE=1 SV=2	DIRPVC(BTD[C])R|	2|	0.45|	0.16971|	0.45	NA	2	1
O14967	511	CLGN	O14967_511	CLGN_HUMAN Calmegin OS=Homo sapiens OX=9606 GN=CLGN PE=1 SV=1	KTDIC(BTD[C])IPQTK|	1|	0.45|	NA|	0.45	NA	1	1
O15042	65	U2SURP	O15042_65	SR140_HUMAN U2 snRNP-associated SURP motif-containing protein OS=Homo sapiens OX=9606 GN=U2SURP PE=1 SV=2	ESLC(BTD[C])DSPHQNLSR|	1|	0.45|	NA|	0.45	NA	1	1
O43865	106	AHCYL1	O43865_106	SAHH2_HUMAN S-adenosylhomocysteine hydrolase-like protein 1 OS=Homo sapiens OX=9606 GN=AHCYL1 PE=1 SV=2	|GSSNFC(BTD[C])VK	|2	|0.45	|0.0	0.45	NA	2	1
O60701	276	UGDH	O60701_276	UGDH_HUMAN UDP-glucose 6-dehydrogenase OS=Homo sapiens OX=9606 GN=UGDH PE=1 SV=1	|ASVGFGGSC(BTD[C])FQK	|1	|0.45	|NA	0.45	NA	1	1
O75643	428	SNRNP200	O75643_428	U520_HUMAN U5 small nuclear ribonucleoprotein 200 kDa helicase OS=Homo sapiens OX=9606 GN=SNRNP200 PE=1 SV=2	RC(BTD[C])QLPDGSFR|	1|	0.45|	NA|	0.45	NA	1	1
P04181	150	OAT	P04181_150	OAT_HUMAN Ornithine aminotransferase, mitochondrial OS=Homo sapiens OX=9606 GN=OAT PE=1 SV=1	|VLPMNTGVEAGETAC(BTD[C])K	|1	|0.45	|NA	0.45	NA	1	1
P34897	412	SHMT2	P34897_412	GLYM_HUMAN Serine hydroxymethyltransferase, mitochondrial OS=Homo sapiens OX=9606 GN=SHMT2 PE=1 SV=3	NTC(BTD[C])PGDR|NTC(BTD[C])PGDR	3|1	0.34|0.56	0.0|NA	0.45	0.15556	4	2
P46776	70	RPL27A	P46776_70	RL27A_HUMAN 60S ribosomal protein L27a OS=Homo sapiens OX=9606 GN=RPL27A PE=1 SV=2	|NQSFC(BTD[C])PTVNLDK	|2	|0.45	|0.0	0.45	NA	2	1
P49585	73	PCYT1A	P49585_73	PCY1A_HUMAN Choline-phosphate cytidylyltransferase A OS=Homo sapiens OX=9606 GN=PCYT1A PE=1 SV=2	|GTPC(BTD[C])ERPVR	|1	|0.45	|NA	0.45	NA	1	1
P53396	1040	ACLY	P53396_1040	ACLY_HUMAN ATP-citrate synthase OS=Homo sapiens OX=9606 GN=ACLY PE=1 SV=3	NC(BTD[C])GSFTR|	1|	0.45|	NA|	0.45	NA	1	1
P62241	174	RPS8	P62241_174	RS8_HUMAN 40S ribosomal protein S8 OS=Homo sapiens OX=9606 GN=RPS8 PE=1 SV=2	LLAC(BTD[C])IASR|LLAC(BTD[C])IASR	2|3	0.46|0.44	0.0|0.04041	0.45	0.01414	5	2
Q02790	396	FKBP4	Q02790_396	FKBP4_HUMAN Peptidyl-prolyl cis-trans isomerase FKBP4 OS=Homo sapiens OX=9606 GN=FKBP4 PE=1 SV=3	TQLAVC(BTD[C])QQR|	2|	0.45|	0.04243|	0.45	NA	2	1
Q07020	134	RPL18	Q07020_134	RL18_HUMAN 60S ribosomal protein L18 OS=Homo sapiens OX=9606 GN=RPL18 PE=1 SV=2	GC(BTD[C])GTVLLSGPR|	3|	0.45|	0.03512|	0.45	NA	3	1
Q15149	3295	PLEC	Q15149_3295	PLEC_HUMAN Plectin OS=Homo sapiens OX=9606 GN=PLEC PE=1 SV=3	|VPLDVAC(BTD[C])AR	|1	|0.45	|NA	0.45	NA	1	1
Q1KMD3	308	HNRNPUL2	Q1KMD3_308	HNRL2_HUMAN Heterogeneous nuclear ribonucleoprotein U-like protein 2 OS=Homo sapiens OX=9606 GN=HNRNPUL2 PE=1 SV=1	EGC(BTD[C])TEVSLLR|	1|	0.45|	NA|	0.45	NA	1	1
Q7L2E3	346	DHX30	Q7L2E3_346	DHX30_HUMAN ATP-dependent RNA helicase DHX30 OS=Homo sapiens OX=9606 GN=DHX30 PE=1 SV=1	RPC(BTD[C])TIQVPEPILR|	1|	0.45|	NA|	0.45	NA	1	1
P33176	421	KIF5B	P33176_421	KINH_HUMAN Kinesin-1 heavy chain OS=Homo sapiens OX=9606 GN=KIF5B PE=1 SV=1	RKC(BTD[C])EEEIAK KC(BTD[C])EEEIAK|RKC(BTD[C])EEEIAK	2|1	0.525|0.37	0.16263|NA	0.4475	0.1096	3	2
P22314	179	UBA1	P22314_179	UBA1_HUMAN Ubiquitin-like modifier-activating enzyme 1 OS=Homo sapiens OX=9606 GN=UBA1 PE=1 SV=3	VGEFC(BTD[C])HNR|VGEFC(BTD[C])HNR	3|2	0.47|0.42	0.02309|0.0	0.445	0.03536	5	2
P26368	429	U2AF2	P26368_429	U2AF2_HUMAN Splicing factor U2AF 65 kDa subunit OS=Homo sapiens OX=9606 GN=U2AF2 PE=1 SV=4	SIEIPRPVDGVEVPGC(BTD[C])GK|SIEIPRPVDGVEVPGC(BTD[C])GK	1|1	0.42|0.47	NA|NA	0.445	0.03536	2	2
P49792	2577	RANBP2	P49792_2577	RBP2_HUMAN E3 SUMO-protein ligase RanBP2 OS=Homo sapiens OX=9606 GN=RANBP2 PE=1 SV=2	KC(BTD[C])ELSK|	2|	0.445|	0.13435|	0.445	NA	2	1
P53618	143	COPB1	P53618_143	COPB_HUMAN Coatomer subunit beta OS=Homo sapiens OX=9606 GN=COPB1 PE=1 SV=3	AC(BTD[C])LEHR|AC(BTD[C])LEHR	4|2	0.47|0.42	0.01|0.0	0.445	0.03536	6	2
P60981	147	DSTN	P60981_147	DEST_HUMAN Destrin OS=Homo sapiens OX=9606 GN=DSTN PE=1 SV=3	AC(BTD[C])IAEK|AC(BTD[C])IAEK	2|2	0.46|0.43	0.0|0.0	0.445	0.02121	4	2
Q14315	1906	FLNC	Q14315_1906	FLNC_HUMAN Filamin-C OS=Homo sapiens OX=9606 GN=FLNC PE=1 SV=3	AEITC(BTD[C])K|AEITC(BTD[C])K	1|2	0.4|0.49	NA|0.0	0.445	0.06364	3	2
O00116	349	AGPS	O00116_349	ADAS_HUMAN Alkyldihydroxyacetonephosphate synthase, peroxisomal OS=Homo sapiens OX=9606 GN=AGPS PE=1 SV=1	|SC(BTD[C])QGPR	|3	|0.44	|0.0	0.44	NA	3	1
O00273	47	DFFA	O00273_47	DFFA_HUMAN DNA fragmentation factor subunit alpha OS=Homo sapiens OX=9606 GN=DFFA PE=1 SV=1	|SKAC(BTD[C])DILAIDK	|1	|0.44	|NA	0.44	NA	1	1
O00592	395	PODXL	O00592_395	PODXL_HUMAN Podocalyxin OS=Homo sapiens OX=9606 GN=PODXL PE=1 SV=2	ATFNPAQDKC(BTD[C])GIR|ATFNPAQDKC(BTD[C])GIR	2|1	0.56|0.32	0.3677|NA	0.44	0.16971	3	2
O14744	196	PRMT5	O14744_196	ANM5_HUMAN Protein arginine N-methyltransferase 5 OS=Homo sapiens OX=9606 GN=PRMT5 PE=1 SV=4	TLC(BTD[C])DYSK|	1|	0.44|	NA|	0.44	NA	1	1
O96019	32	ACTL6A	O96019_32	ACL6A_HUMAN Actin-like protein 6A OS=Homo sapiens OX=9606 GN=ACTL6A PE=1 SV=1	AGYAGEDC(BTD[C])PK|	1|	0.44|	NA|	0.44	NA	1	1
P05023	705	ATP1A1	P05023_705	AT1A1_HUMAN Sodium/potassium-transporting ATPase subunit alpha-1 OS=Homo sapiens OX=9606 GN=ATP1A1 PE=1 SV=1	|LIIVEGC(BTD[C])QR	|1	|0.44	|NA	0.44	NA	1	1
P05388	119	RPLP0	P05388_119	RLA0_HUMAN 60S acidic ribosomal protein P0 OS=Homo sapiens OX=9606 GN=RPLP0 PE=1 SV=1	AGAIAPC(BTD[C])EVTVPAQNTGLGPEK|AGAIAPC(BTD[C])EVTVPAQNTGLGPEK	1|1	0.45|0.43	NA|NA	0.44	0.01414	2	2
P11766	282	ADH5	P11766_282	ADHX_HUMAN Alcohol dehydrogenase class-3 OS=Homo sapiens OX=9606 GN=ADH5 PE=1 SV=4	|AALEAC(BTD[C])HK	|1	|0.44	|NA	0.44	NA	1	1
P15880	229	RPS2	P15880_229	RS2_HUMAN 40S ribosomal protein S2 OS=Homo sapiens OX=9606 GN=RPS2 PE=1 SV=2	GC(BTD[C])TATLGNFAK|	5|	0.44|	0.12462|	0.44	NA	5	1
P21333	1165	FLNA	P21333_1165	FLNA_HUMAN Filamin-A OS=Homo sapiens OX=9606 GN=FLNA PE=1 SV=4	VKC(BTD[C])SGPGLER|VKC(BTD[C])SGPGLER	1|5	0.51|0.37	NA|0.02302	0.44	0.09899	6	2
P35998	389	PSMC2	P35998_389	PRS7_HUMAN 26S proteasome regulatory subunit 7 OS=Homo sapiens OX=9606 GN=PSMC2 PE=1 SV=3	|SVC(BTD[C])TEAGMFAIR	|1	|0.44	|NA	0.44	NA	1	1
P49005	83	POLD2	P49005_83	DPOD2_HUMAN DNA polymerase delta subunit 2 OS=Homo sapiens OX=9606 GN=POLD2 PE=1 SV=1	|KLC(BTD[C])ELQPEEK	|1	|0.44	|NA	0.44	NA	1	1
P50395	317	GDI2	P50395_317	GDIB_HUMAN Rab GDP dissociation inhibitor beta OS=Homo sapiens OX=9606 GN=GDI2 PE=1 SV=2	NTNDANSC(BTD[C])QIIIPQNQVNR|	1|	0.44|	NA|	0.44	NA	1	1
P61106	26	RAB14	P61106_26	RAB14_HUMAN Ras-related protein Rab-14 OS=Homo sapiens OX=9606 GN=RAB14 PE=1 SV=4	SC(BTD[C])LLHQFTEK|	2|	0.44|	0.0|	0.44	NA	2	1
P62191	58	PSMC1	P62191_58	PRS4_HUMAN 26S proteasome regulatory subunit 4 OS=Homo sapiens OX=9606 GN=PSMC1 PE=1 SV=1	LPLVTPHTQC(BTD[C])R|LPLVTPHTQC(BTD[C])R	3|1	0.41|0.47	0.03786|NA	0.44	0.04243	4	2
P62873	25	GNB1	P62873_25	GBB1_HUMAN Guanine nucleotide-binding protein G(I)/G(S)/G(T) subunit beta-1 OS=Homo sapiens OX=9606 GN=GNB1 PE=1 SV=3	KAC(BTD[C])ADATLSQITNNIDPVGR|	1|	0.44|	NA|	0.44	NA	1	1
Q13263	124	TRIM28	Q13263_124	TIF1B_HUMAN Transcription intermediary factor 1-beta OS=Homo sapiens OX=9606 GN=TRIM28 PE=1 SV=5	QQC(BTD[C])FSK|	1|	0.44|	NA|	0.44	NA	1	1
Q13423	1073	NNT	Q13423_1073	NNTM_HUMAN NAD(P) transhydrogenase, mitochondrial OS=Homo sapiens OX=9606 GN=NNT PE=1 SV=3	KTC(BTD[C])DALQAK|KTC(BTD[C])DALQAK	2|1	0.54|0.34	0.29698|NA	0.44	0.14142	3	2
Q15582	49	TGFBI	Q15582_49	BGH3_HUMAN Transforming growth factor-beta-induced protein ig-h3 OS=Homo sapiens OX=9606 GN=TGFBI PE=1 SV=1	QHGPNVC(BTD[C])AVQK|	1|	0.44|	NA|	0.44	NA	1	1
Q16629	73	SRSF7	Q16629_73	SRSF7_HUMAN Serine/arginine-rich splicing factor 7 OS=Homo sapiens OX=9606 GN=SRSF7 PE=1 SV=1	VIC(BTD[C])GSR|	2|	0.44|	0.01414|	0.44	NA	2	1
Q3MHD2	127	LSM12	Q3MHD2_127	LSM12_HUMAN Protein LSM12 homolog OS=Homo sapiens OX=9606 GN=LSM12 PE=1 SV=2	TIKDC(BTD[C])K|TIKDC(BTD[C])K	1|1	0.51|0.37	NA|NA	0.44	0.09899	2	2
Q96BX8	186	MOB3A	Q96BX8_186	MOB3A_HUMAN MOB kinase activator 3A OS=Homo sapiens OX=9606 GN=MOB3A PE=1 SV=1	IAQMGSEAHVNTC(BTD[C])YK|	2|	0.44|	0.0|	0.44	NA	2	1
Q9GZU8	187	FAM192A	Q9GZU8_187	PIP30_HUMAN PSME3-interacting protein OS=Homo sapiens OX=9606 GN=FAM192A PE=1 SV=1	LKPDPEPDDKNQEPSSC(BTD[C])K|	1|	0.44|	NA|	0.44	NA	1	1
Q9NXG2	31	THUMPD1	Q9NXG2_31	THUM1_HUMAN THUMP domain-containing protein 1 OS=Homo sapiens OX=9606 GN=THUMPD1 PE=1 SV=2	RC(BTD[C])DAGGPR|RC(BTD[C])DAGGPR	1|2	0.39|0.49	NA|0.07071	0.44	0.07071	3	2
Q9ULA0	327	DNPEP	Q9ULA0_327	DNPEP_HUMAN Aspartyl aminopeptidase OS=Homo sapiens OX=9606 GN=DNPEP PE=1 SV=1	ISASC(BTD[C])QHPTAFEEAIPK|	1|	0.44|	NA|	0.44	NA	1	1
P17844	354	DDX5	P17844_354	DDX5_HUMAN Probable ATP-dependent RNA helicase DDX5 OS=Homo sapiens OX=9606 GN=DDX5 PE=1 SV=1	RRC(BTD[C])DELTR RC(BTD[C])DELTR|RRC(BTD[C])DELTR	4|1	0.555|0.32	0.25184|NA	0.4375	0.16617	5	2
Q14204	3389	DYNC1H1	Q14204_3389	DYHC1_HUMAN Cytoplasmic dynein 1 heavy chain 1 OS=Homo sapiens OX=9606 GN=DYNC1H1 PE=1 SV=5	ASLAC(BTD[C])GPMVK|ASLAC(BTD[C])GPMVK	4|2	0.455|0.42	0.00577|0.0	0.4375	0.02475	6	2
Q16881	571	TXNRD1	Q16881_571	TRXR1_HUMAN Thioredoxin reductase 1, cytoplasmic OS=Homo sapiens OX=9606 GN=TXNRD1 PE=1 SV=3	DNNKC(BTD[C])YAK|DNNKC(BTD[C])YAK	3|1	0.46|0.41	0.0|NA	0.435	0.03536	4	2
Q8IVF2	4223	AHNAK2	Q8IVF2_4223	AHNK2_HUMAN Protein AHNAK2 OS=Homo sapiens OX=9606 GN=AHNAK2 PE=1 SV=2	VQMPC(BTD[C])LK|VQMPC(BTD[C])LK	2|1	0.54|0.33	0.28284|NA	0.435	0.14849	3	2
Q92621	1275	NUP205	Q92621_1275	NU205_HUMAN Nuclear pore complex protein Nup205 OS=Homo sapiens OX=9606 GN=NUP205 PE=1 SV=3	LLQC(BTD[C])LHAK|LLQC(BTD[C])LHAK	1|1	0.45|0.42	NA|NA	0.435	0.02121	2	2
Q9UPN3	5930	MACF1	Q9UPN3_5930	MACF1_HUMAN Microtubule-actin cross-linking factor 1, isoforms 1/2/3/5 OS=Homo sapiens OX=9606 GN=MACF1 PE=1 SV=4	IREC(BTD[C])ISDNK|	2|	0.435|	0.00707|	0.435	NA	2	1
O43776	537	NARS	O43776_537	SYNC_HUMAN Asparagine--tRNA ligase, cytoplasmic OS=Homo sapiens OX=9606 GN=NARS PE=1 SV=1	DVC(BTD[C])LYPR|	1|	0.43|	NA|	0.43	NA	1	1
O75643	1592	SNRNP200	O75643_1592	U520_HUMAN U5 small nuclear ribonucleoprotein 200 kDa helicase OS=Homo sapiens OX=9606 GN=SNRNP200 PE=1 SV=2	|FLHC(BTD[C])TEK	|1	|0.43	|NA	0.43	NA	1	1
O96007	107	MOCS2	O96007_107	MOC2B_HUMAN Molybdopterin synthase catalytic subunit OS=Homo sapiens OX=9606 GN=MOCS2 PE=1 SV=1	|KIC(BTD[C])SDIR	|1	|0.43	|NA	0.43	NA	1	1
P05023	606	ATP1A1	P05023_606	AT1A1_HUMAN Sodium/potassium-transporting ATPase subunit alpha-1 OS=Homo sapiens OX=9606 GN=ATP1A1 PE=1 SV=1	AAVPDAVGKC(BTD[C])R|AAVPDAVGKC(BTD[C])R	3|2	0.4|0.46	0.09815|0.01414	0.43	0.04243	5	2
P20645	132	M6PR	P20645_132	MPRD_HUMAN Cation-dependent mannose-6-phosphate receptor OS=Homo sapiens OX=9606 GN=M6PR PE=1 SV=1	|GGDEYDNHC(BTD[C])GK	|1	|0.43	|NA	0.43	NA	1	1
P42166	518	TMPO	P42166_518	LAP2A_HUMAN Lamina-associated polypeptide 2, isoform alpha OS=Homo sapiens OX=9606 GN=TMPO PE=1 SV=2	|QLPSLAC(BTD[C])K	|3	|0.43	|0.0	0.43	NA	3	1
P49207	49	RPL34	P49207_49	RL34_HUMAN 60S ribosomal protein L34 OS=Homo sapiens OX=9606 GN=RPL34 PE=1 SV=3	SACGVC(BTD[C])PGR|	1|	0.43|	NA|	0.43	NA	1	1
P51452	124	DUSP3	P51452_124	DUS3_HUMAN Dual specificity protein phosphatase 3 OS=Homo sapiens OX=9606 GN=DUSP3 PE=1 SV=1	VLVHC(BTD[C])R|VLVHC(BTD[C])R	1|2	0.42|0.44	NA|0.04243	0.43	0.01414	3	2
P52272	653	HNRNPM	P52272_653	HNRPM_HUMAN Heterogeneous nuclear ribonucleoprotein M OS=Homo sapiens OX=9606 GN=HNRNPM PE=1 SV=3	KAC(BTD[C])QIFVR AC(BTD[C])QIFVR|KAC(BTD[C])QIFVR	2|2	0.49|0.37	0.21213|0.0	0.43	0.08485	4	2
P57678	720	GEMIN4	P57678_720	GEMI4_HUMAN Gem-associated protein 4 OS=Homo sapiens OX=9606 GN=GEMIN4 PE=1 SV=2	|RC(BTD[C])LSLDR	|1	|0.43	|NA	0.43	NA	1	1
Q04864	27	REL	Q04864_27	REL_HUMAN Proto-oncogene c-Rel OS=Homo sapiens OX=9606 GN=REL PE=1 SV=1	YKC(BTD[C])EGR|	1|	0.43|	NA|	0.43	NA	1	1
Q13838	165	DDX39B	Q13838_165	DX39B_HUMAN Spliceosome RNA helicase DDX39B OS=Homo sapiens OX=9606 GN=DDX39B PE=1 SV=1	KNC(BTD[C])PHIVVGTPGR NC(BTD[C])PHIVVGTPGR|NC(BTD[C])PHIVVGTPGR	3|2	0.47|0.39	0.09815|0.08485	0.43	0.05657	5	2
Q14019	10	COTL1	Q14019_10	COTL1_HUMAN Coactosin-like protein OS=Homo sapiens OX=9606 GN=COTL1 PE=1 SV=3	IDKEAC(BTD[C])R|IDKEAC(BTD[C])R	4|4	0.44|0.42	0.09215|0.005	0.43	0.01414	8	2
Q15149	730	PLEC	Q15149_730	PLEC_HUMAN Plectin OS=Homo sapiens OX=9606 GN=PLEC PE=1 SV=3	GAYRDC(BTD[C])LGR|	1|	0.43|	NA|	0.43	NA	1	1
Q15393	269	SF3B3	Q15393_269	SF3B3_HUMAN Splicing factor 3B subunit 3 OS=Homo sapiens OX=9606 GN=SF3B3 PE=1 SV=4	|NFGDQPDIRC(BTD[C])PIPR	|1	|0.43	|NA	0.43	NA	1	1
Q16531	260	DDB1	Q16531_260	DDB1_HUMAN DNA damage-binding protein 1 OS=Homo sapiens OX=9606 GN=DDB1 PE=1 SV=1	QSTIVC(BTD[C])HNR|QSTIVC(BTD[C])HNR	1|3	0.46|0.4	NA|0.05033	0.43	0.04243	4	2
Q6P1N0	616	CC2D1A	Q6P1N0_616	C2D1A_HUMAN Coiled-coil and C2 domain-containing protein 1A OS=Homo sapiens OX=9606 GN=CC2D1A PE=1 SV=1	LAEDC(BTD[C])KR|	1|	0.43|	NA|	0.43	NA	1	1
Q7Z3C6	197	ATG9A	Q7Z3C6_197	ATG9A_HUMAN Autophagy-related protein 9A OS=Homo sapiens OX=9606 GN=ATG9A PE=1 SV=3	EHQIC(BTD[C])IHK|	1|	0.43|	NA|	0.43	NA	1	1
Q7Z6Z7	3213	HUWE1	Q7Z6Z7_3213	HUWE1_HUMAN E3 ubiquitin-protein ligase HUWE1 OS=Homo sapiens OX=9606 GN=HUWE1 PE=1 SV=3	NLC(BTD[C])YHAQTR|	1|	0.43|	NA|	0.43	NA	1	1
Q9H0M0	890	WWP1	Q9H0M0_890	WWP1_HUMAN NEDD4-like E3 ubiquitin-protein ligase WWP1 OS=Homo sapiens OX=9606 GN=WWP1 PE=1 SV=1	SHTC(BTD[C])FNR|	1|	0.43|	NA|	0.43	NA	1	1
Q9H8V3	221	ECT2	Q9H8V3_221	ECT2_HUMAN Protein ECT2 OS=Homo sapiens OX=9606 GN=ECT2 PE=1 SV=4	|VTHLVANC(BTD[C])TQGEK	|1	|0.43	|NA	0.43	NA	1	1
Q9Y2U9	223	KLHDC2	Q9Y2U9_223	KLDC2_HUMAN Kelch domain-containing protein 2 OS=Homo sapiens OX=9606 GN=KLHDC2 PE=1 SV=1	|AAHAC(BTD[C])ATVGNR	|1	|0.43	|NA	0.43	NA	1	1
P62244	72	RPS15A	P62244_72	RS15A_HUMAN 40S ribosomal protein S15a OS=Homo sapiens OX=9606 GN=RPS15A PE=1 SV=2	LNKC(BTD[C])GVISPR C(BTD[C])GVISPR|LNKC(BTD[C])GVISPR C(BTD[C])GVISPR	6|8	0.49|0.365	0.14634|0.20995	0.4275	0.08839	14	2
Q9H488	249	POFUT1	Q9H488_249	OFUT1_HUMAN GDP-fucose protein O-fucosyltransferase 1 OS=Homo sapiens OX=9606 GN=POFUT1 PE=1 SV=1	NAC(BTD[C])AMLK|NAC(BTD[C])AMLK	2|2	0.41|0.445	0.07071|0.02121	0.4275	0.02475	4	2
O94906	604	PRPF6	O94906_604	PRP6_HUMAN Pre-mRNA-processing factor 6 OS=Homo sapiens OX=9606 GN=PRPF6 PE=1 SV=1	AVAHC(BTD[C])PK|AVAHC(BTD[C])PK	3|4	0.54|0.31	0.17321|0.005	0.425	0.16263	7	2
P15170	327	GSPT1	P15170_327	ERF3A_HUMAN Eukaryotic peptide chain release factor GTP-binding subunit ERF3A OS=Homo sapiens OX=9606 GN=GSPT1 PE=1 SV=1	LESGSIC(BTD[C])K|LESGSIC(BTD[C])K	3|2	0.37|0.48	0.09238|0.0	0.425	0.07778	5	2
P37802	124	TAGLN2	P37802_124	TAGL2_HUMAN Transgelin-2 OS=Homo sapiens OX=9606 GN=TAGLN2 PE=1 SV=3	NMAC(BTD[C])VQR|NMAC(BTD[C])VQR	7|5	0.45|0.4	0.10558|0.02387	0.425	0.03536	12	2
P49748	237	ACADVL	P49748_237	ACADV_HUMAN Very long-chain specific acyl-CoA dehydrogenase, mitochondrial OS=Homo sapiens OX=9606 GN=ACADVL PE=1 SV=1	TSAVPSPC(BTD[C])GK|TSAVPSPC(BTD[C])GK	1|1	0.36|0.49	NA|NA	0.425	0.09192	2	2
P51858	108	HDGF	P51858_108	HDGF_HUMAN Hepatoma-derived growth factor OS=Homo sapiens OX=9606 GN=HDGF PE=1 SV=1	KSC(BTD[C])VEEPEPEPEAAEGDGDKK|KSC(BTD[C])VEEPEPEPEAAEGDGDKK	2|2	0.38|0.47	0.0|0.11314	0.425	0.06364	4	2
Q07020	101	RPL18	Q07020_101	RL18_HUMAN 60S ribosomal protein L18 OS=Homo sapiens OX=9606 GN=RPL18 PE=1 SV=2	LKVC(BTD[C])ALR|LKVC(BTD[C])ALR	2|1	0.54|0.31	0.0|NA	0.425	0.16263	3	2
Q9H7N4	950	SCAF1	Q9H7N4_950	SFR19_HUMAN Splicing factor, arginine/serine-rich 19 OS=Homo sapiens OX=9606 GN=SCAF1 PE=1 SV=3	SKADSC(BTD[C])SQAAGTK|SKADSC(BTD[C])SQAAGTK	1|1	0.52|0.33	NA|NA	0.425	0.13435	2	2
P62879	204	GNB2	P62879_204	GBB2_HUMAN Guanine nucleotide-binding protein G(I)/G(S)/G(T) subunit beta-2 OS=Homo sapiens OX=9606 GN=GNB2 PE=1 SV=3	TFVSGAC(BTD[C])DASIK|TFVSGAC(BTD[C])DASIK	2|1	0.445|0.4	0.09192|NA	0.4225	0.03182	3	2
Q8WYA6	370	CTNNBL1	Q8WYA6_370	CTBL1_HUMAN Beta-catenin-like protein 1 OS=Homo sapiens OX=9606 GN=CTNNBL1 PE=1 SV=1	VLDHAMIGPEGTDNC(BTD[C])HK|VLDHAMIGPEGTDNC(BTD[C])HK	2|1	0.445|0.4	0.10607|NA	0.4225	0.03182	3	2
O00571	317	DDX3X	O00571_317	DDX3X_HUMAN ATP-dependent RNA helicase DDX3X OS=Homo sapiens OX=9606 GN=DDX3X PE=1 SV=3	|GC(BTD[C])HLLVATPGR	|1	|0.42	|NA	0.42	NA	1	1
O15523	221	DDX3Y	O15523_221	DDX3Y_HUMAN ATP-dependent RNA helicase DDX3Y OS=Homo sapiens OX=9606 GN=DDX3Y PE=1 SV=2	RDLMAC(BTD[C])AQTGSGK|	1|	0.42|	NA|	0.42	NA	1	1
O75683	189	SURF6	O75683_189	SURF6_HUMAN Surfeit locus protein 6 OS=Homo sapiens OX=9606 GN=SURF6 PE=1 SV=3	KAEEATEAQEVVEATPEGAC(BTD[C])TEPR|	1|	0.42|	NA|	0.42	NA	1	1
O94826	317	TOMM70	O94826_317	TOM70_HUMAN Mitochondrial import receptor subunit TOM70 OS=Homo sapiens OX=9606 GN=TOMM70 PE=1 SV=1	|IISEC(BTD[C])SK	|1	|0.42	|NA	0.42	NA	1	1
P09382	61	LGALS1	P09382_61	LEG1_HUMAN Galectin-1 OS=Homo sapiens OX=9606 GN=LGALS1 PE=1 SV=2	FNAHGDANTIVC(BTD[C])NSK|FNAHGDANTIVC(BTD[C])NSK	2|5	0.42|0.42	0.01414|0.1957	0.42	0	7	2
P09622	69	DLD	P09622_69	DLDH_HUMAN Dihydrolipoyl dehydrogenase, mitochondrial OS=Homo sapiens OX=9606 GN=DLD PE=1 SV=2	TVC(BTD[C])IEK|	1|	0.42|	NA|	0.42	NA	1	1
P17812	30	CTPS1	P17812_30	PYRG1_HUMAN CTP synthase 1 OS=Homo sapiens OX=9606 GN=CTPS1 PE=1 SV=2	SC(BTD[C])GLHVTSIK|	2|	0.42|	0.0|	0.42	NA	2	1
P21333	1453	FLNA	P21333_1453	FLNA_HUMAN Filamin-A OS=Homo sapiens OX=9606 GN=FLNA PE=1 SV=4	VKC(BTD[C])SGPGLSPGMVR|	3|	0.42|	0.02082|	0.42	NA	3	1
P35250	270	RFC2	P35250_270	RFC2_HUMAN Replication factor C subunit 2 OS=Homo sapiens OX=9606 GN=RFC2 PE=1 SV=3	EMIQHC(BTD[C])VNANIDEAYK|	1|	0.42|	NA|	0.42	NA	1	1
P46013	1007	MKI67	P46013_1007	KI67_HUMAN Proliferation marker protein Ki-67 OS=Homo sapiens OX=9606 GN=MKI67 PE=1 SV=2	MPC(BTD[C])QSLQPEPINTPTHTK|MPC(BTD[C])QSLQPEPINTPTHTK	1|1	0.39|0.45	NA|NA	0.42	0.04243	2	2
P49915	489	GMPS	P49915_489	GUAA_HUMAN GMP synthase [glutamine-hydrolyzing] OS=Homo sapiens OX=9606 GN=GMPS PE=1 SV=1	VKAC(BTD[C])TTEEDQEK|	1|	0.42|	NA|	0.42	NA	1	1
P53621	514	COPA	P53621_514	COPA_HUMAN Coatomer subunit alpha OS=Homo sapiens OX=9606 GN=COPA PE=1 SV=2	HAIVIC(BTD[C])NR|	1|	0.42|	NA|	0.42	NA	1	1
P55786	265	NPEPPS	P55786_265	PSA_HUMAN Puromycin-sensitive aminopeptidase OS=Homo sapiens OX=9606 GN=NPEPPS PE=1 SV=2	SKDGVC(BTD[C])VR|SKDGVC(BTD[C])VR	1|1	0.37|0.47	NA|NA	0.42	0.07071	2	2
Q00610	736	CLTC	Q00610_736	CLH1_HUMAN Clathrin heavy chain 1 OS=Homo sapiens OX=9606 GN=CLTC PE=1 SV=5	YIQAAC(BTD[C])K|	2|	0.42|	0.01414|	0.42	NA	2	1
Q14980	160	NUMA1	Q14980_160	NUMA1_HUMAN Nuclear mitotic apparatus protein 1 OS=Homo sapiens OX=9606 GN=NUMA1 PE=1 SV=2	APVPSTC(BTD[C])SSTFPEELSPPSHQAK|	1|	0.42|	NA|	0.42	NA	1	1
Q15637	279	SF1	Q15637_279	SF01_HUMAN Splicing factor 1 OS=Homo sapiens OX=9606 GN=SF1 PE=1 SV=4	|SITNTTVC(BTD[C])TK	|1	|0.42	|NA	0.42	NA	1	1
Q8N6H7	97	ARFGAP2	Q8N6H7_97	ARFG2_HUMAN ADP-ribosylation factor GTPase-activating protein 2 OS=Homo sapiens OX=9606 GN=ARFGAP2 PE=1 SV=1	|QHGC(BTD[C])TANDANTK	|1	|0.42	|NA	0.42	NA	1	1
Q9BS26	92	ERP44	Q9BS26_92	ERP44_HUMAN Endoplasmic reticulum resident protein 44 OS=Homo sapiens OX=9606 GN=ERP44 PE=1 SV=1	VDC(BTD[C])DQHSDIAQR|	1|	0.42|	NA|	0.42	NA	1	1
Q9BVP2	234	GNL3	Q9BVP2_234	GNL3_HUMAN Guanine nucleotide-binding protein-like 3 OS=Homo sapiens OX=9606 GN=GNL3 PE=1 SV=2	|SEVC(BTD[C])FGK	|1	|0.42	|NA	0.42	NA	1	1
Q9HB07	305	C12orf10	Q9HB07_305	MYG1_HUMAN UPF0160 protein MYG1, mitochondrial OS=Homo sapiens OX=9606 GN=C12orf10 PE=1 SV=2	|IQC(BTD[C])VPK	|1	|0.42	|NA	0.42	NA	1	1
Q9NQW6	978	ANLN	Q9NQW6_978	ANLN_HUMAN Anillin OS=Homo sapiens OX=9606 GN=ANLN PE=1 SV=2	|IKC(BTD[C])QVNSSVEER	|1	|0.42	|NA	0.42	NA	1	1
Q9NZM1	1425	MYOF	Q9NZM1_1425	MYOF_HUMAN Myoferlin OS=Homo sapiens OX=9606 GN=MYOF PE=1 SV=1	ASLLSAPPC(BTD[C])R|	1|	0.42|	NA|	0.42	NA	1	1
Q9UL25	29	RAB21	Q9UL25_29	RAB21_HUMAN Ras-related protein Rab-21 OS=Homo sapiens OX=9606 GN=RAB21 PE=1 SV=3	VVLLGEGC(BTD[C])VGK|	1|	0.42|	NA|	0.42	NA	1	1
Q9ULV4	420	CORO1C	Q9ULV4_420	COR1C_HUMAN Coronin-1C OS=Homo sapiens OX=9606 GN=CORO1C PE=1 SV=1	KC(BTD[C])DLISIPK|KC(BTD[C])DLISIPK	4|1	0.43|0.41	0.015|NA	0.42	0.01414	5	2
Q9UPN3	1283	MACF1	Q9UPN3_1283	MACF1_HUMAN Microtubule-actin cross-linking factor 1, isoforms 1/2/3/5 OS=Homo sapiens OX=9606 GN=MACF1 PE=1 SV=4	|AC(BTD[C])HGTLIK	|1	|0.42	|NA	0.42	NA	1	1
Q9Y508	110	RNF114	Q9Y508_110	RN114_HUMAN E3 ubiquitin-protein ligase RNF114 OS=Homo sapiens OX=9606 GN=RNF114 PE=1 SV=1	SHVATC(BTD[C])SK|SHVATC(BTD[C])SK	5|3	0.38|0.46	0.02683|0.13279	0.42	0.05657	8	2
Q13148	50	TARDBP	Q13148_50	TADBP_HUMAN TAR DNA-binding protein 43 OS=Homo sapiens OX=9606 GN=TARDBP PE=1 SV=1	NPVSQC(BTD[C])MR|NPVSQC(BTD[C])MR	2|4	0.39|0.445	0.08485|0.08446	0.4175	0.03889	6	2
A6NHR9	1967	SMCHD1	A6NHR9_1967	SMHD1_HUMAN Structural maintenance of chromosomes flexible hinge domain-containing protein 1 OS=Homo sapiens OX=9606 GN=SMCHD1 PE=1 SV=2	KC(BTD[C])NDSLR|KC(BTD[C])NDSLR	1|1	0.53|0.3	NA|NA	0.415	0.16263	2	2
P00390	467	GSR	P00390_467	GSHR_HUMAN Glutathione reductase, mitochondrial OS=Homo sapiens OX=9606 GN=GSR PE=1 SV=2	MVC(BTD[C])ANKEEK|MVC(BTD[C])ANKEEK	1|1	0.45|0.38	NA|NA	0.415	0.0495	2	2
P08559	41	PDHA1	P08559_41	ODPA_HUMAN Pyruvate dehydrogenase E1 component subunit alpha, somatic form, mitochondrial OS=Homo sapiens OX=9606 GN=PDHA1 PE=1 SV=3	KC(BTD[C])DLHR|KC(BTD[C])DLHR	2|3	0.46|0.37	0.21213|0.02309	0.415	0.06364	5	2
P11216	319	PYGB	P11216_319	PYGB_HUMAN Glycogen phosphorylase, brain form OS=Homo sapiens OX=9606 GN=PYGB PE=1 SV=5	FGC(BTD[C])RDPVR|FGC(BTD[C])RDPVR	1|1	0.41|0.42	NA|NA	0.415	0.00707	2	2
P11413	13	G6PD	P11413_13	G6PD_HUMAN Glucose-6-phosphate 1-dehydrogenase OS=Homo sapiens OX=9606 GN=G6PD PE=1 SV=4	TQVC(BTD[C])GILR|TQVC(BTD[C])GILR	1|1	0.32|0.51	NA|NA	0.415	0.13435	2	2
P21333	1018	FLNA	P21333_1018	FLNA_HUMAN Filamin-A OS=Homo sapiens OX=9606 GN=FLNA PE=1 SV=4	IVGPSGAAVPC(BTD[C])K IVGPSGAAVPC(BTD[C])KVEPGLGADNSVVR|IVGPSGAAVPC(BTD[C])K IVGPSGAAVPC(BTD[C])KVEPGLGADNSVVR	2|4	0.49|0.34	0.14142|0.10178	0.415	0.10607	6	2
P23528	139	CFL1	P23528_139	COF1_HUMAN Cofilin-1 OS=Homo sapiens OX=9606 GN=CFL1 PE=1 SV=3	HELQANC(BTD[C])YEEVKDR HELQANC(BTD[C])YEEVK|HELQANC(BTD[C])YEEVKDR HELQANC(BTD[C])YEEVK	9|4	0.42|0.41	0.28506|0.19799	0.415	0.00707	13	2
P30050	141	RPL12	P30050_141	RL12_HUMAN 60S ribosomal protein L12 OS=Homo sapiens OX=9606 GN=RPL12 PE=1 SV=1	EILGTAQSVGC(BTD[C])NVDGR|EILGTAQSVGC(BTD[C])NVDGR	1|1	0.41|0.42	NA|NA	0.415	0.00707	2	2
P46060	169	RANGAP1	P46060_169	RAGP1_HUMAN Ran GTPase-activating protein 1 OS=Homo sapiens OX=9606 GN=RANGAP1 PE=1 SV=1	ILAAALTEC(BTD[C])HR|ILAAALTEC(BTD[C])HRK ILAAALTEC(BTD[C])HR	1|3	0.38|0.45	NA|0.05196	0.415	0.0495	4	2
Q05519	455	SRSF11	Q05519_455	SRS11_HUMAN Serine/arginine-rich splicing factor 11 OS=Homo sapiens OX=9606 GN=SRSF11 PE=1 SV=1	TKEC(BTD[C])SVEK|TKEC(BTD[C])SVEK	2|1	0.36|0.47	0.08485|NA	0.415	0.07778	3	2
Q13838	239	DDX39B	Q13838_239	DX39B_HUMAN Spliceosome RNA helicase DDX39B OS=Homo sapiens OX=9606 GN=DDX39B PE=1 SV=1	EIRPVC(BTD[C])R|EIRPVC(BTD[C])R	2|2	0.34|0.49	0.0|0.2687	0.415	0.10607	4	2
Q14699	211	RFTN1	Q14699_211	RFTN1_HUMAN Raftlin OS=Homo sapiens OX=9606 GN=RFTN1 PE=1 SV=4	GDHASLENEKPGTGDVC(BTD[C])SAPAGR|GDHASLENEKPGTGDVC(BTD[C])SAPAGR	2|1	0.44|0.39	0.0|NA	0.415	0.03536	3	2
Q16630	159	CPSF6	Q16630_159	CPSF6_HUMAN Cleavage and polyadenylation specificity factor subunit 6 OS=Homo sapiens OX=9606 GN=CPSF6 PE=1 SV=2	RELHGQNPVVTPC(BTD[C])NK ELHGQNPVVTPC(BTD[C])NK|ELHGQNPVVTPC(BTD[C])NK	3|2	0.5|0.33	0.16093|0.0	0.415	0.12021	5	2
Q92945	379	KHSRP	Q92945_379	FUBP2_HUMAN Far upstream element-binding protein 2 OS=Homo sapiens OX=9606 GN=KHSRP PE=1 SV=4	IAHIMGPPDRC(BTD[C])EHAAR|IAHIMGPPDRC(BTD[C])EHAAR	3|2	0.45|0.375	0.10116|0.19092	0.4125	0.05303	5	2
P00492	206	HPRT1	P00492_206	HPRT_HUMAN Hypoxanthine-guanine phosphoribosyltransferase OS=Homo sapiens OX=9606 GN=HPRT1 PE=1 SV=2	|DLNHVC(BTD[C])VISETGK	|1	|0.41	|NA	0.41	NA	1	1
P16615	669	ATP2A2	P16615_669	AT2A2_HUMAN Sarcoplasmic/endoplasmic reticulum calcium ATPase 2 OS=Homo sapiens OX=9606 GN=ATP2A2 PE=1 SV=1	DAC(BTD[C])LNAR|DAC(BTD[C])LNAR	1|3	0.45|0.37	NA|0.0	0.41	0.05657	4	2
P17301	299	ITGA2	P17301_299	ITA2_HUMAN Integrin alpha-2 OS=Homo sapiens OX=9606 GN=ITGA2 PE=1 SV=1	AVIDQC(BTD[C])NHDNILR|	1|	0.41|	NA|	0.41	NA	1	1
P17980	240	PSMC3	P17980_240	PRS6A_HUMAN 26S proteasome regulatory subunit 6A OS=Homo sapiens OX=9606 GN=PSMC3 PE=1 SV=3	AC(BTD[C])AAQTK|AC(BTD[C])AAQTK	2|1	0.47|0.35	0.11314|NA	0.41	0.08485	3	2
P46199	646	MTIF2	P46199_646	IF2M_HUMAN Translation initiation factor IF-2, mitochondrial OS=Homo sapiens OX=9606 GN=MTIF2 PE=1 SV=2	KVPVAGC(BTD[C])R|KVPVAGC(BTD[C])R	1|1	0.4|0.42	NA|NA	0.41	0.01414	2	2
P49454	503	CENPF	P49454_503	CENPF_HUMAN Centromere protein F OS=Homo sapiens OX=9606 GN=CENPF PE=1 SV=3	EVC(BTD[C])HLEAELK|	1|	0.41|	NA|	0.41	NA	1	1
P49915	554	GMPS	P49915_554	GUAA_HUMAN GMP synthase [glutamine-hydrolyzing] OS=Homo sapiens OX=9606 GN=GMPS PE=1 SV=1	MC(BTD[C])HNVNR|MC(BTD[C])HNVNR	3|3	0.42|0.4	0.0|0.1562	0.41	0.01414	6	2
P53041	11	PPP5C	P53041_11	PPP5_HUMAN Serine/threonine-protein phosphatase 5 OS=Homo sapiens OX=9606 GN=PPP5C PE=1 SV=1	TEC(BTD[C])AEPPRDEPPADGALKR|TEC(BTD[C])AEPPRDEPPADGALK	1|1	0.31|0.51	NA|NA	0.41	0.14142	2	2
P53396	20	ACLY	P53396_20	ACLY_HUMAN ATP-citrate synthase OS=Homo sapiens OX=9606 GN=ACLY PE=1 SV=3	FIC(BTD[C])TTSAIQNR|FIC(BTD[C])TTSAIQNR	3|1	0.43|0.39	0.00577|NA	0.41	0.02828	4	2
P61221	88	ABCE1	P61221_88	ABCE1_HUMAN ATP-binding cassette sub-family E member 1 OS=Homo sapiens OX=9606 GN=ABCE1 PE=1 SV=1	YC(BTD[C])ANAFK|	4|	0.41|	0.06238|	0.41	NA	4	1
P78527	223	PRKDC	P78527_223	PRKDC_HUMAN DNA-dependent protein kinase catalytic subunit OS=Homo sapiens OX=9606 GN=PRKDC PE=1 SV=3	LPVLAGC(BTD[C])LK|	2|	0.41|	0.0|	0.41	NA	2	1
Q00610	617	CLTC	Q00610_617	CLH1_HUMAN Clathrin heavy chain 1 OS=Homo sapiens OX=9606 GN=CLTC PE=1 SV=5	AHIAQLC(BTD[C])EK|AHIAQLC(BTD[C])EK	5|2	0.4|0.42	0.01|0.0	0.41	0.01414	7	2
Q02543	109	RPL18A	Q02543_109	RL18A_HUMAN 60S ribosomal protein L18a OS=Homo sapiens OX=9606 GN=RPL18A PE=1 SV=2	DLTTAGAVTQC(BTD[C])YR|	1|	0.41|	NA|	0.41	NA	1	1
Q03405	67	PLAUR	Q03405_67	UPAR_HUMAN Urokinase plasminogen activator surface receptor OS=Homo sapiens OX=9606 GN=PLAUR PE=1 SV=1	SC(BTD[C])THSEK|	2|	0.41|	0.0|	0.41	NA	2	1
Q13813	1622	SPTAN1	Q13813_1622	SPTN1_HUMAN Spectrin alpha chain, non-erythrocytic 1 OS=Homo sapiens OX=9606 GN=SPTAN1 PE=1 SV=3	|GAC(BTD[C])AGSEDAVK	|1	|0.41	|NA	0.41	NA	1	1
Q5RKV6	64	EXOSC6	Q5RKV6_64	EXOS6_HUMAN Exosome complex component MTR3 OS=Homo sapiens OX=9606 GN=EXOSC6 PE=1 SV=1	VLC(BTD[C])AVSGPR|	1|	0.41|	NA|	0.41	NA	1	1
Q69YH5	315	CDCA2	Q69YH5_315	CDCA2_HUMAN Cell division cycle-associated protein 2 OS=Homo sapiens OX=9606 GN=CDCA2 PE=1 SV=2	|SPATPAC(BTD[C])R	|1	|0.41	|NA	0.41	NA	1	1
Q6NW34	419	NEPRO	Q6NW34_419	NEPRO_HUMAN Nucleolus and neural progenitor protein OS=Homo sapiens OX=9606 GN=NEPRO PE=1 SV=3	|KLEC(BTD[C])IK	|2	|0.41	|0.09899	0.41	NA	2	1
Q8WUM4	512	PDCD6IP	Q8WUM4_512	PDC6I_HUMAN Programmed cell death 6-interacting protein OS=Homo sapiens OX=9606 GN=PDCD6IP PE=1 SV=1	EC(BTD[C])YQSHR|EC(BTD[C])YQSHR	5|3	0.42|0.4	0.0493|0.04619	0.41	0.01414	8	2
Q96AE4	132	FUBP1	Q96AE4_132	FUBP1_HUMAN Far upstream element-binding protein 1 OS=Homo sapiens OX=9606 GN=FUBP1 PE=1 SV=3	IQQESGC(BTD[C])K|	2|	0.41|	0.0|	0.41	NA	2	1
Q96ER3	366	SAAL1	Q96ER3_366	SAAL1_HUMAN Protein SAAL1 OS=Homo sapiens OX=9606 GN=SAAL1 PE=1 SV=2	VLQNMEQC(BTD[C])QK|	1|	0.41|	NA|	0.41	NA	1	1
Q9HAV4	221	XPO5	Q9HAV4_221	XPO5_HUMAN Exportin-5 OS=Homo sapiens OX=9606 GN=XPO5 PE=1 SV=1	AQANC(BTD[C])R|AQANC(BTD[C])R	2|1	0.48|0.34	0.22627|NA	0.41	0.09899	3	2
Q9UJX3	509	ANAPC7	Q9UJX3_509	APC7_HUMAN Anaphase-promoting complex subunit 7 OS=Homo sapiens OX=9606 GN=ANAPC7 PE=1 SV=4	NALANQSDC(BTD[C])VLHR|NALANQSDC(BTD[C])VLHR	1|1	0.41|0.41	NA|NA	0.41	0	2	2
P05023	211	ATP1A1	P05023_211	AT1A1_HUMAN Sodium/potassium-transporting ATPase subunit alpha-1 OS=Homo sapiens OX=9606 GN=ATP1A1 PE=1 SV=1	IISANGC(BTD[C])K|IISANGC(BTD[C])K	2|1	0.415|0.4	0.00707|NA	0.4075	0.01061	3	2
P24752	196	ACAT1	P24752_196	THIL_HUMAN Acetyl-CoA acetyltransferase, mitochondrial OS=Homo sapiens OX=9606 GN=ACAT1 PE=1 SV=1	IHMGSC(BTD[C])AENTAK|IHMGSC(BTD[C])AENTAK	6|8	0.405|0.41	0.25542|0.26026	0.4075	0.00354	14	2
P09211	15	GSTP1	P09211_15	GSTP1_HUMAN Glutathione S-transferase P OS=Homo sapiens OX=9606 GN=GSTP1 PE=1 SV=2	GRC(BTD[C])AALR|GRC(BTD[C])AALR	3|2	0.4|0.41	0.09539|0.01414	0.405	0.00707	5	2
P11216	808	PYGB	P11216_808	PYGB_HUMAN Glycogen phosphorylase, brain form OS=Homo sapiens OX=9606 GN=PYGB PE=1 SV=5	|NIAC(BTD[C])SGK	|4	|0.405	|0.0866	0.405	NA	4	1
P22061	102	PCMT1	P22061_102	PIMT_HUMAN Protein-L-isoaspartate(D-aspartate) O-methyltransferase OS=Homo sapiens OX=9606 GN=PCMT1 PE=1 SV=4	MVGC(BTD[C])TGK|MVGC(BTD[C])TGK	1|2	0.38|0.43	NA|0.11314	0.405	0.03536	3	2
P46734	29	MAP2K3	P46734_29	MP2K3_HUMAN Dual specificity mitogen-activated protein kinase kinase 3 OS=Homo sapiens OX=9606 GN=MAP2K3 PE=1 SV=2	ISC(BTD[C])MSKPPAPNPTPPR|ISC(BTD[C])MSKPPAPNPTPPR	2|3	0.47|0.34	0.07071|0.01155	0.405	0.09192	5	2
P57721	141	PCBP3	P57721_141	PCBP3_HUMAN Poly(rC)-binding protein 3 OS=Homo sapiens OX=9606 GN=PCBP3 PE=2 SV=2	LVVPASQC(BTD[C])GSLIGK|LVVPASQC(BTD[C])GSLIGK	1|2	0.42|0.39	NA|0.01414	0.405	0.02121	3	2
Q08J23	502	NSUN2	Q08J23_502	NSUN2_HUMAN tRNA (cytosine(34)-C(5))-methyltransferase OS=Homo sapiens OX=9606 GN=NSUN2 PE=1 SV=2	KDGVC(BTD[C])GPPPSK|KDGVC(BTD[C])GPPPSK DGVC(BTD[C])GPPPSKK	1|2	0.32|0.49	NA|0.18385	0.405	0.12021	3	2
Q13045	560	FLII	Q13045_560	FLII_HUMAN Protein flightless-1 homolog OS=Homo sapiens OX=9606 GN=FLII PE=1 SV=2	AC(BTD[C])SAIHAVNLR|AC(BTD[C])SAIHAVNLR	3|1	0.35|0.46	0.00577|NA	0.405	0.07778	4	2
O75223	144	GGCT	O75223_144	GGCT_HUMAN Gamma-glutamylcyclotransferase OS=Homo sapiens OX=9606 GN=GGCT PE=1 SV=1	|IIC(BTD[C])MGAK	|1	|0.4	|NA	0.4	NA	1	1
P05198	98	EIF2S1	P05198_98	IF2A_HUMAN Eukaryotic translation initiation factor 2 subunit 1 OS=Homo sapiens OX=9606 GN=EIF2S1 PE=1 SV=3	VSPEEAIKC(BTD[C])EDK|VSPEEAIKC(BTD[C])EDK	3|6	0.41|0.39	0.01732|0.08532	0.4	0.01414	9	2
P08670	328	VIM	P08670_328	VIME_HUMAN Vimentin OS=Homo sapiens OX=9606 GN=VIM PE=1 SV=4	QVQSLTC(BTD[C])EVDALK|QVQSLTC(BTD[C])EVDALK	4|3	0.4|0.4	0.1869|0.00577	0.4	0	7	2
P12955	158	PEPD	P12955_158	PEPD_HUMAN Xaa-Pro dipeptidase OS=Homo sapiens OX=9606 GN=PEPD PE=1 SV=3	|GVNTDSGSVC(BTD[C])R	|1	|0.4	|NA	0.4	NA	1	1
P13489	191	RNH1	P13489_191	RINI_HUMAN Ribonuclease inhibitor OS=Homo sapiens OX=9606 GN=RNH1 PE=1 SV=2	VLC(BTD[C])QGLK|	2|	0.4|	0.0|	0.4	NA	2	1
P25205	148	MCM3	P25205_148	MCM3_HUMAN DNA replication licensing factor MCM3 OS=Homo sapiens OX=9606 GN=MCM3 PE=1 SV=3	SVHYC(BTD[C])PATK|SVHYC(BTD[C])PATK	1|1	0.37|0.43	NA|NA	0.4	0.04243	2	2
P52701	1241	MSH6	P52701_1241	MSH6_HUMAN DNA mismatch repair protein Msh6 OS=Homo sapiens OX=9606 GN=MSH6 PE=1 SV=2	ELAETIKC(BTD[C])R|	1|	0.4|	NA|	0.4	NA	1	1
P53618	877	COPB1	P53618_877	COPB_HUMAN Coatomer subunit beta OS=Homo sapiens OX=9606 GN=COPB1 PE=1 SV=3	|STNMKC(BTD[C])LTPEK	|3	|0.4	|0.44456	0.4	NA	3	1
P54687	221	BCAT1	P54687_221	BCAT1_HUMAN Branched-chain-amino-acid aminotransferase, cytosolic OS=Homo sapiens OX=9606 GN=BCAT1 PE=1 SV=3	GGTGDC(BTD[C])K|GGTGDC(BTD[C])K	1|1	0.33|0.47	NA|NA	0.4	0.09899	2	2
P55060	387	CSE1L	P55060_387	XPO2_HUMAN Exportin-2 OS=Homo sapiens OX=9606 GN=CSE1L PE=1 SV=3	|AAC(BTD[C])DLVR	|1	|0.4	|NA	0.4	NA	1	1
P55735	31	SEC13	P55735_31	SEC13_HUMAN Protein SEC13 homolog OS=Homo sapiens OX=9606 GN=SEC13 PE=1 SV=3	LATC(BTD[C])SSDR|	1|	0.4|	NA|	0.4	NA	1	1
Q05639	326	EEF1A2	Q05639_326	EF1A2_HUMAN Elongation factor 1-alpha 2 OS=Homo sapiens OX=9606 GN=EEF1A2 PE=1 SV=1	GNVC(BTD[C])GDSK|GNVC(BTD[C])GDSK	1|1	0.31|0.49	NA|NA	0.4	0.12728	2	2
Q6PJG6	308	BRAT1	Q6PJG6_308	BRAT1_HUMAN BRCA1-associated ATM activator 1 OS=Homo sapiens OX=9606 GN=BRAT1 PE=1 SV=2	|LEHC(BTD[C])PQALR	|1	|0.4	|NA	0.4	NA	1	1
Q92556	622	ELMO1	Q92556_622	ELMO1_HUMAN Engulfment and cell motility protein 1 OS=Homo sapiens OX=9606 GN=ELMO1 PE=1 SV=2	DC(BTD[C])PHMK|DC(BTD[C])PHMK	4|1	0.45|0.35	0.09032|NA	0.4	0.07071	5	2
Q96EI5	34	TCEAL4	Q96EI5_34	TCAL4_HUMAN Transcription elongation factor A protein-like 4 OS=Homo sapiens OX=9606 GN=TCEAL4 PE=1 SV=2	KPEVTC(BTD[C])TLEDK|KPEVTC(BTD[C])TLEDK	1|1	0.34|0.46	NA|NA	0.4	0.08485	2	2
Q96QK1	286	VPS35	Q96QK1_286	VPS35_HUMAN Vacuolar protein sorting-associated protein 35 OS=Homo sapiens OX=9606 GN=VPS35 PE=1 SV=2	AC(BTD[C])AELHQNVNVK|AC(BTD[C])AELHQNVNVK	2|2	0.4|0.4	0.0|0.0	0.4	0	4	2
Q96QK1	699	VPS35	Q96QK1_699	VPS35_HUMAN Vacuolar protein sorting-associated protein 35 OS=Homo sapiens OX=9606 GN=VPS35 PE=1 SV=2	VMEC(BTD[C])LKK|VMEC(BTD[C])LKK	1|3	0.3|0.5	NA|0.08083	0.4	0.14142	4	2
Q9H9A6	438	LRRC40	Q9H9A6_438	LRC40_HUMAN Leucine-rich repeat-containing protein 40 OS=Homo sapiens OX=9606 GN=LRRC40 PE=1 SV=1	|NQLC(BTD[C])EIPKR	|1	|0.4	|NA	0.4	NA	1	1
Q9HA64	24	FN3KRP	Q9HA64_24	KT3K_HUMAN Ketosamine-3-kinase OS=Homo sapiens OX=9606 GN=FN3KRP PE=1 SV=2	ATGHSGGGC(BTD[C])ISQGR|	1|	0.4|	NA|	0.4	NA	1	1
Q9UJS0	377	SLC25A13	Q9UJS0_377	CMC2_HUMAN Calcium-binding mitochondrial carrier protein Aralar2 OS=Homo sapiens OX=9606 GN=SLC25A13 PE=1 SV=2	NSFDC(BTD[C])FKK|	1|	0.4|	NA|	0.4	NA	1	1
O60841	1158	EIF5B	O60841_1158	IF2P_HUMAN Eukaryotic translation initiation factor 5B OS=Homo sapiens OX=9606 GN=EIF5B PE=1 SV=4	KGQEVC(BTD[C])VK|KGQEVC(BTD[C])VK	2|1	0.455|0.34	0.09192|NA	0.3975	0.08132	3	2
O00273	21	DFFA	O00273_21	DFFA_HUMAN DNA fragmentation factor subunit alpha OS=Homo sapiens OX=9606 GN=DFFA PE=1 SV=1	TLKPC(BTD[C])LLR|TLKPC(BTD[C])LLR	1|1	0.36|0.43	NA|NA	0.395	0.0495	2	2
P41227	194	NAA10	P41227_194	NAA10_HUMAN N-alpha-acetyltransferase 10 OS=Homo sapiens OX=9606 GN=NAA10 PE=1 SV=1	GNSPPSSGEAC(BTD[C])R|GNSPPSSGEAC(BTD[C])R	4|2	0.32|0.47	0.12|0.08485	0.395	0.10607	6	2
P42892	428	ECE1	P42892_428	ECE1_HUMAN Endothelin-converting enzyme 1 OS=Homo sapiens OX=9606 GN=ECE1 PE=1 SV=2	KTC(BTD[C])LPR|	2|	0.395|	0.02121|	0.395	NA	2	1
P45974	838	USP5	P45974_838	UBP5_HUMAN Ubiquitin carboxyl-terminal hydrolase 5 OS=Homo sapiens OX=9606 GN=USP5 PE=1 SV=2	VC(BTD[C])ASEKPPK|VC(BTD[C])ASEKPPK	4|4	0.38|0.41	0.035|0.03266	0.395	0.02121	8	2
P51114	141	FXR1	P51114_141	FXR1_HUMAN Fragile X mental retardation syndrome-related protein 1 OS=Homo sapiens OX=9606 GN=FXR1 PE=1 SV=3	EAC(BTD[C])ANENAHK|	4|	0.395|	0.07937|	0.395	NA	4	1
P53602	160	MVD	P53602_160	MVD1_HUMAN Diphosphomevalonate decarboxylase OS=Homo sapiens OX=9606 GN=MVD PE=1 SV=1	GSGSAC(BTD[C])R|GSGSAC(BTD[C])R	2|2	0.405|0.385	0.03536|0.03536	0.395	0.01414	4	2
Q14318	378	FKBP8	Q14318_378	FKBP8_HUMAN Peptidyl-prolyl cis-trans isomerase FKBP8 OS=Homo sapiens OX=9606 GN=FKBP8 PE=1 SV=2	LPAKC(BTD[C])PGK|LPAKC(BTD[C])PGK	2|2	0.42|0.37	0.01414|0.04243	0.395	0.03536	4	2
Q9HAV7	124	GRPEL1	Q9HAV7_124	GRPE1_HUMAN GrpE protein homolog 1, mitochondrial OS=Homo sapiens OX=9606 GN=GRPEL1 PE=1 SV=2	ATQC(BTD[C])VPK|ATQC(BTD[C])VPK	2|1	0.36|0.43	0.0|NA	0.395	0.0495	3	2
Q9Y490	2196	TLN1	Q9Y490_2196	TLN1_HUMAN Talin-1 OS=Homo sapiens OX=9606 GN=TLN1 PE=1 SV=3	AVAAGNSC(BTD[C])R|AVAAGNSC(BTD[C])R	4|3	0.485|0.3	0.02887|0.05033	0.3925	0.13081	7	2
O95394	348	PGM3	O95394_348	AGM1_HUMAN Phosphoacetylglucosamine mutase OS=Homo sapiens OX=9606 GN=PGM3 PE=1 SV=1	|VPVYC(BTD[C])TK	|1	|0.39	|NA	0.39	NA	1	1
P00441	7	SOD1	P00441_7	SODC_HUMAN Superoxide dismutase [Cu-Zn] OS=Homo sapiens OX=9606 GN=SOD1 PE=1 SV=2	|AVC(BTD[C])VLK	|2	|0.39	|0.01414	0.39	NA	2	1
P08865	163	RPSA	P08865_163	RSSA_HUMAN 40S ribosomal protein SA OS=Homo sapiens OX=9606 GN=RPSA PE=1 SV=4	YVDIAIPC(BTD[C])NNK|YVDIAIPC(BTD[C])NNK	2|1	0.42|0.36	0.0|NA	0.39	0.04243	3	2
P09874	24	PARP1	P09874_24	PARP1_HUMAN Poly [ADP-ribose] polymerase 1 OS=Homo sapiens OX=9606 GN=PARP1 PE=1 SV=4	KC(BTD[C])SESIPK|	1|	0.39|	NA|	0.39	NA	1	1
P23526	228	AHCY	P23526_228	SAHH_HUMAN Adenosylhomocysteinase OS=Homo sapiens OX=9606 GN=AHCY PE=1 SV=4	|GC(BTD[C])AQALR	|2	|0.39	|0.0	0.39	NA	2	1
P27708	758	CAD	P27708_758	PYR1_HUMAN CAD protein OS=Homo sapiens OX=9606 GN=CAD PE=1 SV=3	IGSC(BTD[C])MK|IGSC(BTD[C])MK	3|3	0.41|0.37	0.0|0.16462	0.39	0.02828	6	2
P27708	897	CAD	P27708_897	PYR1_HUMAN CAD protein OS=Homo sapiens OX=9606 GN=CAD PE=1 SV=3	|QELGIC(BTD[C])PAVK	|1	|0.39	|NA	0.39	NA	1	1
P35998	377	PSMC2	P35998_377	PRS7_HUMAN 26S proteasome regulatory subunit 7 OS=Homo sapiens OX=9606 GN=PSMC2 PE=1 SV=3	LC(BTD[C])PNSTGAEIR|LC(BTD[C])PNSTGAEIR	3|3	0.31|0.47	0.00577|0.08083	0.39	0.11314	6	2
Q13813	956	SPTAN1	Q13813_956	SPTN1_HUMAN Spectrin alpha chain, non-erythrocytic 1 OS=Homo sapiens OX=9606 GN=SPTAN1 PE=1 SV=3	|EQAQSC(BTD[C])R	|1	|0.39	|NA	0.39	NA	1	1
Q96QK1	653	VPS35	Q96QK1_653	VPS35_HUMAN Vacuolar protein sorting-associated protein 35 OS=Homo sapiens OX=9606 GN=VPS35 PE=1 SV=2	|TQC(BTD[C])ALAASK	|1	|0.39	|NA	0.39	NA	1	1
Q96TA1	334	NIBAN2	Q96TA1_334	NIBA2_HUMAN Protein Niban 2 OS=Homo sapiens OX=9606 GN=NIBAN2 PE=1 SV=3	AEVC(BTD[C])VR|AEVC(BTD[C])VR	1|1	0.38|0.4	NA|NA	0.39	0.01414	2	2
Q9BXB5	615	OSBPL10	Q9BXB5_615	OSB10_HUMAN Oxysterol-binding protein-related protein 10 OS=Homo sapiens OX=9606 GN=OSBPL10 PE=1 SV=2	VSINC(BTD[C])AK|VSINC(BTD[C])AK	1|1	0.38|0.4	NA|NA	0.39	0.01414	2	2
Q9H115	164	NAPB	Q9H115_164	SNAB_HUMAN Beta-soluble NSF attachment protein OS=Homo sapiens OX=9606 GN=NAPB PE=1 SV=2	|GEESNSSANKC(BTD[C])LLK	|3	|0.39	|0.02309	0.39	NA	3	1
Q9HB90	377	RRAGC	Q9HB90_377	RRAGC_HUMAN Ras-related GTP-binding protein C OS=Homo sapiens OX=9606 GN=RRAGC PE=1 SV=1	SC(BTD[C])GHQTSASSLK|	3|	0.39|	0.12702|	0.39	NA	3	1
Q9NR56	27	MBNL1	Q9NR56_27	MBNL1_HUMAN Muscleblind-like protein 1 OS=Homo sapiens OX=9606 GN=MBNL1 PE=1 SV=2	GTC(BTD[C])SRPDTECK|	1|	0.39|	NA|	0.39	NA	1	1
Q9UET6	295	FTSJ1	Q9UET6_295	TRM7_HUMAN Putative tRNA (cytidine(32)/guanosine(34)-2'-O)-methyltransferase OS=Homo sapiens OX=9606 GN=FTSJ1 PE=1 SV=2	EIRPQDC(BTD[C])PISR|EIRPQDC(BTD[C])PISR	1|1	0.37|0.41	NA|NA	0.39	0.02828	2	2
Q9Y5L0	511	TNPO3	Q9Y5L0_511	TNPO3_HUMAN Transportin-3 OS=Homo sapiens OX=9606 GN=TNPO3 PE=1 SV=3	|GLC(BTD[C])EKPLASAAAK	|1	|0.39	|NA	0.39	NA	1	1
Q9Y5M8	179	SRPRB	Q9Y5M8_179	SRPRB_HUMAN Signal recognition particle receptor subunit beta OS=Homo sapiens OX=9606 GN=SRPRB PE=1 SV=3	|NTPSFLIAC(BTD[C])NK	|1	|0.39	|NA	0.39	NA	1	1
Q06136	245	KDSR	Q06136_245	KDSR_HUMAN 3-ketodihydrosphingosine reductase OS=Homo sapiens OX=9606 GN=KDSR PE=1 SV=1	LISETTSVC(BTD[C])KPEQVAK|LISETTSVC(BTD[C])KPEQVAK	2|1	0.395|0.38	0.02121|NA	0.3875	0.01061	3	2
O75116	1257	ROCK2	O75116_1257	ROCK2_HUMAN Rho-associated protein kinase 2 OS=Homo sapiens OX=9606 GN=ROCK2 PE=1 SV=4	SNYIC(BTD[C])HK|	2|	0.385|	0.12021|	0.385	NA	2	1
P23396	119	RPS3	P23396_119	RS3_HUMAN 40S ribosomal protein S3 OS=Homo sapiens OX=9606 GN=RPS3 PE=1 SV=2	AC(BTD[C])YGVLR|AC(BTD[C])YGVLR	1|1	0.47|0.3	NA|NA	0.385	0.12021	2	2
P40938	179	RFC3	P40938_179	RFC3_HUMAN Replication factor C subunit 3 OS=Homo sapiens OX=9606 GN=RFC3 PE=1 SV=2	SRC(BTD[C])LAVR|SRC(BTD[C])LAVR	1|1	0.34|0.43	NA|NA	0.385	0.06364	2	2
Q14444	226	CAPRIN1	Q14444_226	CAPR1_HUMAN Caprin-1 OS=Homo sapiens OX=9606 GN=CAPRIN1 PE=1 SV=2	EKPVC(BTD[C])GTTYK|EKPVC(BTD[C])GTTYK	5|6	0.46|0.31	0.18022|0.01329	0.385	0.10607	11	2
Q16543	54	CDC37	Q16543_54	CDC37_HUMAN Hsp90 co-chaperone Cdc37 OS=Homo sapiens OX=9606 GN=CDC37 PE=1 SV=1	EKEELDRGC(BTD[C])R|EKEELDRGC(BTD[C])R	1|1	0.39|0.38	NA|NA	0.385	0.00707	2	2
Q9BUQ8	677	DDX23	Q9BUQ8_677	DDX23_HUMAN Probable ATP-dependent RNA helicase DDX23 OS=Homo sapiens OX=9606 GN=DDX23 PE=1 SV=3	KGC(BTD[C])DVLAK|KGC(BTD[C])DVLAK	2|1	0.48|0.29	0.0|NA	0.385	0.13435	3	2
Q9H0L4	150	CSTF2T	Q9H0L4_150	CSTFT_HUMAN Cleavage stimulation factor subunit 2 tau variant OS=Homo sapiens OX=9606 GN=CSTF2T PE=1 SV=1	|LC(BTD[C])VQNSHQEAR	|2	|0.385	|0.00707	0.385	NA	2	1
Q9UBE0	214	SAE1	Q9UBE0_214	SAE1_HUMAN SUMO-activating enzyme subunit 1 OS=Homo sapiens OX=9606 GN=SAE1 PE=1 SV=1	VVFC(BTD[C])PVK|	4|	0.385|	0.00957|	0.385	NA	4	1
P08133	59	ANXA6	P08133_59	ANXA6_HUMAN Annexin A6 OS=Homo sapiens OX=9606 GN=ANXA6 PE=1 SV=3	QRQEVC(BTD[C])QSYK QEVC(BTD[C])QSYK|QEVC(BTD[C])QSYK	2|2	0.395|0.37	0.06364|0.0	0.3825	0.01768	4	2
P78527	491	PRKDC	P78527_491	PRKDC_HUMAN DNA-dependent protein kinase catalytic subunit OS=Homo sapiens OX=9606 GN=PRKDC PE=1 SV=3	IC(BTD[C])SKPVVLPK|IC(BTD[C])SKPVVLPK	4|2	0.375|0.39	0.04359|0.0	0.3825	0.01061	6	2
O00116	413	AGPS	O00116_413	ADAS_HUMAN Alkyldihydroxyacetonephosphate synthase, peroxisomal OS=Homo sapiens OX=9606 GN=AGPS PE=1 SV=1	|QRC(BTD[C])APASIR	|1	|0.38	|NA	0.38	NA	1	1
O14757	48	CHEK1	O14757_48	CHK1_HUMAN Serine/threonine-protein kinase Chk1 OS=Homo sapiens OX=9606 GN=CHEK1 PE=1 SV=2	AVDC(BTD[C])PENIKK|	1|	0.38|	NA|	0.38	NA	1	1
O60343	316	TBC1D4	O60343_316	TBCD4_HUMAN TBC1 domain family member 4 OS=Homo sapiens OX=9606 GN=TBC1D4 PE=1 SV=2	|SRC(BTD[C])SSVTGVQR	|1	|0.38	|NA	0.38	NA	1	1
O95456	157	PSMG1	O95456_157	PSMG1_HUMAN Proteasome assembly chaperone 1 OS=Homo sapiens OX=9606 GN=PSMG1 PE=1 SV=1	VFGSC(BTD[C])PR|	2|	0.38|	0.0|	0.38	NA	2	1
P09110	381	ACAA1	P09110_381	THIK_HUMAN 3-ketoacyl-CoA thiolase, peroxisomal OS=Homo sapiens OX=9606 GN=ACAA1 PE=1 SV=2	VNPLGGAVALGHPLGC(BTD[C])TGAR|	2|	0.38|	0.05657|	0.38	NA	2	1
P09211	48	GSTP1	P09211_48	GSTP1_HUMAN Glutathione S-transferase P OS=Homo sapiens OX=9606 GN=GSTP1 PE=1 SV=2	|ASC(BTD[C])LYGQLPK	|3	|0.38	|0.00577	0.38	NA	3	1
P12081	235	HARS	P12081_235	SYHC_HUMAN Histidine--tRNA ligase, cytoplasmic OS=Homo sapiens OX=9606 GN=HARS PE=1 SV=2	TIC(BTD[C])SSVDKLDK|	1|	0.38|	NA|	0.38	NA	1	1
P14678	19	SNRPB	P14678_19	RSMB_HUMAN Small nuclear ribonucleoprotein-associated proteins B and B' OS=Homo sapiens OX=9606 GN=SNRPB PE=1 SV=2	|MRC(BTD[C])ILQDGR	|1	|0.38	|NA	0.38	NA	1	1
P15927	219	RPA2	P15927_219	RFA2_HUMAN Replication protein A 32 kDa subunit OS=Homo sapiens OX=9606 GN=RPA2 PE=1 SV=1	AC(BTD[C])PRPEGLNFQDLK|	1|	0.38|	NA|	0.38	NA	1	1
P17655	374	CAPN2	P17655_374	CAN2_HUMAN Calpain-2 catalytic subunit OS=Homo sapiens OX=9606 GN=CAPN2 PE=1 SV=6	GSTAGGC(BTD[C])R|GSTAGGC(BTD[C])R	1|1	0.32|0.44	NA|NA	0.38	0.08485	2	2
P22102	41	GART	P22102_41	PUR2_HUMAN Trifunctional purine biosynthetic protein adenosine-3 OS=Homo sapiens OX=9606 GN=GART PE=1 SV=1	QVLVAPGNAGTAC(BTD[C])SEK|	1|	0.38|	NA|	0.38	NA	1	1
P42785	233	PRCP	P42785_233	PCP_HUMAN Lysosomal Pro-X carboxypeptidase OS=Homo sapiens OX=9606 GN=PRCP PE=1 SV=1	SGPHC(BTD[C])SESIHR|	2|	0.38|	0.0|	0.38	NA	2	1
P50991	295	CCT4	P50991_295	TCPD_HUMAN T-complex protein 1 subunit delta OS=Homo sapiens OX=9606 GN=CCT4 PE=1 SV=4	KTGC(BTD[C])NVLLIQK TGC(BTD[C])NVLLIQK|KTGC(BTD[C])NVLLIQK TGC(BTD[C])NVLLIQK	6|4	0.39|0.37	0.03488|0.02	0.38	0.01414	10	2
P60660	32	MYL6	P60660_32	MYL6_HUMAN Myosin light polypeptide 6 OS=Homo sapiens OX=9606 GN=MYL6 PE=1 SV=2	ILYSQC(BTD[C])GDVMR|	1|	0.38|	NA|	0.38	NA	1	1
P61289	133	PSME3	P61289_133	PSME3_HUMAN Proteasome activator complex subunit 3 OS=Homo sapiens OX=9606 GN=PSME3 PE=1 SV=1	LLIEKC(BTD[C])NTVK|LLIEKC(BTD[C])NTVK	1|3	0.32|0.44	NA|0.04359	0.38	0.08485	4	2
P78406	106	RAE1	P78406_106	RAE1L_HUMAN mRNA export factor OS=Homo sapiens OX=9606 GN=RAE1 PE=1 SV=1	|VFTASC(BTD[C])DK	|1	|0.38	|NA	0.38	NA	1	1
Q01082	604	SPTBN1	Q01082_604	SPTB2_HUMAN Spectrin beta chain, non-erythrocytic 1 OS=Homo sapiens OX=9606 GN=SPTBN1 PE=1 SV=2	FATDGEGYKPC(BTD[C])DPQVIR|	1|	0.38|	NA|	0.38	NA	1	1
Q10567	866	AP1B1	Q10567_866	AP1B1_HUMAN AP-1 complex subunit beta-1 OS=Homo sapiens OX=9606 GN=AP1B1 PE=1 SV=2	DC(BTD[C])PLNAEAASSK|DC(BTD[C])PLNAEAASSK	1|2	0.35|0.41	NA|0.08485	0.38	0.04243	3	2
Q13325	124	IFIT5	Q13325_124	IFIT5_HUMAN Interferon-induced protein with tetratricopeptide repeats 5 OS=Homo sapiens OX=9606 GN=IFIT5 PE=1 SV=1	IGNVC(BTD[C])K|	1|	0.38|	NA|	0.38	NA	1	1
Q14980	658	NUMA1	Q14980_658	NUMA1_HUMAN Nuclear mitotic apparatus protein 1 OS=Homo sapiens OX=9606 GN=NUMA1 PE=1 SV=2	KVEELQAC(BTD[C])VETAR|	1|	0.38|	NA|	0.38	NA	1	1
Q14997	798	PSME4	Q14997_798	PSME4_HUMAN Proteasome activator complex subunit 4 OS=Homo sapiens OX=9606 GN=PSME4 PE=1 SV=2	LQHC(BTD[C])GDGK|	1|	0.38|	NA|	0.38	NA	1	1
Q15061	315	WDR43	Q15061_315	WDR43_HUMAN WD repeat-containing protein 43 OS=Homo sapiens OX=9606 GN=WDR43 PE=1 SV=3	|KPLTSNC(BTD[C])TIQIATPGK	|1	|0.38	|NA	0.38	NA	1	1
Q2M389	936	WASHC4	Q2M389_936	WASC4_HUMAN WASH complex subunit 4 OS=Homo sapiens OX=9606 GN=WASHC4 PE=1 SV=2	|SGGLHC(BTD[C])SSNAIR	|1	|0.38	|NA	0.38	NA	1	1
Q3MHD2	20	LSM12	Q3MHD2_20	LSM12_HUMAN Protein LSM12 homolog OS=Homo sapiens OX=9606 GN=LSM12 PE=1 SV=2	TC(BTD[C])QEQR|	1|	0.38|	NA|	0.38	NA	1	1
Q7L014	501	DDX46	Q7L014_501	DDX46_HUMAN Probable ATP-dependent RNA helicase DDX46 OS=Homo sapiens OX=9606 GN=DDX46 PE=1 SV=2	GAEIIVC(BTD[C])TPGR|	1|	0.38|	NA|	0.38	NA	1	1
Q7Z6Z7	1879	HUWE1	Q7Z6Z7_1879	HUWE1_HUMAN E3 ubiquitin-protein ligase HUWE1 OS=Homo sapiens OX=9606 GN=HUWE1 PE=1 SV=3	VLGPAAC(BTD[C])R|	1|	0.38|	NA|	0.38	NA	1	1
Q86WB0	149	ZC3HC1	Q86WB0_149	NIPA_HUMAN Nuclear-interacting partner of ALK OS=Homo sapiens OX=9606 GN=ZC3HC1 PE=1 SV=1	ALC(BTD[C])TAHEK|	1|	0.38|	NA|	0.38	NA	1	1
Q8N684	389	CPSF7	Q8N684_389	CPSF7_HUMAN Cleavage and polyadenylation specificity factor subunit 7 OS=Homo sapiens OX=9606 GN=CPSF7 PE=1 SV=1	|VANDERC(BTD[C])R	|1	|0.38	|NA	0.38	NA	1	1
Q92688	114	ANP32B	Q92688_114	AN32B_HUMAN Acidic leucine-rich nuclear phosphoprotein 32 family member B OS=Homo sapiens OX=9606 GN=ANP32B PE=1 SV=1	KLEC(BTD[C])LK|	2|	0.38|	0.01414|	0.38	NA	2	1
Q96SB4	188	SRPK1	Q96SB4_188	SRPK1_HUMAN SRSF protein kinase 1 OS=Homo sapiens OX=9606 GN=SRPK1 PE=1 SV=2	SNYQGLPLPC(BTD[C])VK|	1|	0.38|	NA|	0.38	NA	1	1
Q99717	65	SMAD5	Q99717_65	SMAD5_HUMAN Mothers against decapentaplegic homolog 5 OS=Homo sapiens OX=9606 GN=SMAD5 PE=1 SV=1	ALSSPGQPSKC(BTD[C])VTIPR|	1|	0.38|	NA|	0.38	NA	1	1
Q9UPN7	455	PPP6R1	Q9UPN7_455	PP6R1_HUMAN Serine/threonine-protein phosphatase 6 regulatory subunit 1 OS=Homo sapiens OX=9606 GN=PPP6R1 PE=1 SV=5	|VQC(BTD[C])AGGPR	|1	|0.38	|NA	0.38	NA	1	1
Q9Y3B8	137	REXO2	Q9Y3B8_137	ORN_HUMAN Oligoribonuclease, mitochondrial OS=Homo sapiens OX=9606 GN=REXO2 PE=1 SV=3	QQTPPGLC(BTD[C])PLAGNSVHEDK|	1|	0.38|	NA|	0.38	NA	1	1
Q9Y5A7	400	NUB1	Q9Y5A7_400	NUB1_HUMAN NEDD8 ultimate buster 1 OS=Homo sapiens OX=9606 GN=NUB1 PE=1 SV=2	|AC(BTD[C])DGNVDHAATHITNR	|2	|0.38	|0.0	0.38	NA	2	1
O75390	211	CS	O75390_211	CISY_HUMAN Citrate synthase, mitochondrial OS=Homo sapiens OX=9606 GN=CS PE=1 SV=2	LPC(BTD[C])VAAK|LPC(BTD[C])VAAK	2|2	0.37|0.38	0.01414|0.0	0.375	0.00707	4	2
P31948	339	STIP1	P31948_339	STIP1_HUMAN Stress-induced-phosphoprotein 1 OS=Homo sapiens OX=9606 GN=STIP1 PE=1 SV=1	|KC(BTD[C])QQAEK	|4	|0.375	|0.07506	0.375	NA	4	1
P35658	1003	NUP214	P35658_1003	NU214_HUMAN Nuclear pore complex protein Nup214 OS=Homo sapiens OX=9606 GN=NUP214 PE=1 SV=2	TSC(BTD[C])KDDEAVVQAPR|	2|	0.375|	0.00707|	0.375	NA	2	1
P50991	379	CCT4	P50991_379	TCPD_HUMAN T-complex protein 1 subunit delta OS=Homo sapiens OX=9606 GN=CCT4 PE=1 SV=4	ITGC(BTD[C])ASPGK|ITGC(BTD[C])ASPGK	4|4	0.385|0.365	0.1684|0.1097	0.375	0.01414	8	2
Q15738	132	NSDHL	Q15738_132	NSDHL_HUMAN Sterol-4-alpha-carboxylate 3-dehydrogenase, decarboxylating OS=Homo sapiens OX=9606 GN=NSDHL PE=1 SV=2	NVIETC(BTD[C])K|NVIETC(BTD[C])K	1|1	0.33|0.42	NA|NA	0.375	0.06364	2	2
Q9BR76	332	CORO1B	Q9BR76_332	COR1B_HUMAN Coronin-1B OS=Homo sapiens OX=9606 GN=CORO1B PE=1 SV=1	GLEVSKC(BTD[C])EIAR|GLEVSKC(BTD[C])EIAR	2|2	0.36|0.39	0.0|0.0	0.375	0.02121	4	2
Q9H0C8	312	ILKAP	Q9H0C8_312	ILKAP_HUMAN Integrin-linked kinase-associated serine/threonine phosphatase 2C OS=Homo sapiens OX=9606 GN=ILKAP PE=1 SV=1	RC(BTD[C])QLTPNDR|RC(BTD[C])QLTPNDR	2|1	0.36|0.39	0.0|NA	0.375	0.02121	3	2
P22314	632	UBA1	P22314_632	UBA1_HUMAN Ubiquitin-like modifier-activating enzyme 1 OS=Homo sapiens OX=9606 GN=UBA1 PE=1 SV=3	SIPIC(BTD[C])TLK|SIPIC(BTD[C])TLK	2|5	0.385|0.36	0.00707|0.01517	0.3725	0.01768	7	2
O75534	739	CSDE1	O75534_739	CSDE1_HUMAN Cold shock domain-containing protein E1 OS=Homo sapiens OX=9606 GN=CSDE1 PE=1 SV=2	|VC(BTD[C])EGPK	|1	|0.37	|NA	0.37	NA	1	1
P07910	46	HNRNPC	P07910_46	HNRPC_HUMAN Heterogeneous nuclear ribonucleoproteins C1/C2 OS=Homo sapiens OX=9606 GN=HNRNPC PE=1 SV=4	IVGC(BTD[C])SVHK|IVGC(BTD[C])SVHK	3|3	0.37|0.37	0.01528|0.02082	0.37	0	6	2
P09234	25	SNRPC	P09234_25	RU1C_HUMAN U1 small nuclear ribonucleoprotein C OS=Homo sapiens OX=9606 GN=SNRPC PE=1 SV=1	|THC(BTD[C])SGR	|1	|0.37	|NA	0.37	NA	1	1
P21980	211	TGM2	P21980_211	TGM2_HUMAN Protein-glutamine gamma-glutamyltransferase 2 OS=Homo sapiens OX=9606 GN=TGM2 PE=1 SV=2	NAGRDC(BTD[C])SR|NAGRDC(BTD[C])SR	1|2	0.33|0.41	NA|0.11314	0.37	0.05657	3	2
P23588	457	EIF4B	P23588_457	IF4B_HUMAN Eukaryotic translation initiation factor 4B OS=Homo sapiens OX=9606 GN=EIF4B PE=1 SV=2	SLENETLNKEEDC(BTD[C])HSPTSKPPKPDQPLK|	1|	0.37|	NA|	0.37	NA	1	1
P31948	403	STIP1	P31948_403	STIP1_HUMAN Stress-induced-phosphoprotein 1 OS=Homo sapiens OX=9606 GN=STIP1 PE=1 SV=1	AAC(BTD[C])YTK|	1|	0.37|	NA|	0.37	NA	1	1
P33992	197	MCM5	P33992_197	MCM5_HUMAN DNA replication licensing factor MCM5 OS=Homo sapiens OX=9606 GN=MCM5 PE=1 SV=5	KC(BTD[C])NTDQAGR|KC(BTD[C])NTDQAGRPK KC(BTD[C])NTDQAGR	1|3	0.36|0.38	NA|0.14048	0.37	0.01414	4	2
P49917	510	LIG4	P49917_510	DNLI4_HUMAN DNA ligase 4 OS=Homo sapiens OX=9606 GN=LIG4 PE=1 SV=2	|VGSGC(BTD[C])TMK	|1	|0.37	|NA	0.37	NA	1	1
P53618	235	COPB1	P53618_235	COPB_HUMAN Coatomer subunit beta OS=Homo sapiens OX=9606 GN=COPB1 PE=1 SV=3	|VC(BTD[C])HANPSER	|2	|0.37	|0.0	0.37	NA	2	1
P53621	1148	COPA	P53621_1148	COPA_HUMAN Coatomer subunit alpha OS=Homo sapiens OX=9606 GN=COPA PE=1 SV=2	|ILSAC(BTD[C])EK	|1	|0.37	|NA	0.37	NA	1	1
Q13085	813	ACACA	Q13085_813	ACACA_HUMAN Acetyl-CoA carboxylase 1 OS=Homo sapiens OX=9606 GN=ACACA PE=1 SV=2	RPGAALDPGC(BTD[C])VLAK|	1|	0.37|	NA|	0.37	NA	1	1
Q14790	164	CASP8	Q14790_164	CASP8_HUMAN Caspase-8 OS=Homo sapiens OX=9606 GN=CASP8 PE=1 SV=1	RVC(BTD[C])AQINK|RVC(BTD[C])AQINK	1|1	0.45|0.29	NA|NA	0.37	0.11314	2	2
Q6UVJ0	444	SASS6	Q6UVJ0_444	SAS6_HUMAN Spindle assembly abnormal protein 6 homolog OS=Homo sapiens OX=9606 GN=SASS6 PE=1 SV=1	|IKEQEVC(BTD[C])K	|1	|0.37	|NA	0.37	NA	1	1
Q8N1G4	249	LRRC47	Q8N1G4_249	LRC47_HUMAN Leucine-rich repeat-containing protein 47 OS=Homo sapiens OX=9606 GN=LRRC47 PE=1 SV=1	|MVSGC(BTD[C])QTR	|1	|0.37	|NA	0.37	NA	1	1
Q9H2U1	135	DHX36	Q9H2U1_135	DHX36_HUMAN ATP-dependent DNA/RNA helicase DHX36 OS=Homo sapiens OX=9606 GN=DHX36 PE=1 SV=2	NTPC(BTD[C])SENKLDIQEK|	1|	0.37|	NA|	0.37	NA	1	1
Q9NZT2	330	OGFR	Q9NZT2_330	OGFR_HUMAN Opioid growth factor receptor OS=Homo sapiens OX=9606 GN=OGFR PE=1 SV=3	TC(BTD[C])GPEHSK|	3|	0.37|	0.0|	0.37	NA	3	1
Q9UDY2	615	TJP2	Q9UDY2_615	ZO2_HUMAN Tight junction protein ZO-2 OS=Homo sapiens OX=9606 GN=TJP2 PE=1 SV=2	|SHFEC(BTD[C])EK	|1	|0.37	|NA	0.37	NA	1	1
Q9UQ35	956	SRRM2	Q9UQ35_956	SRRM2_HUMAN Serine/arginine repetitive matrix protein 2 OS=Homo sapiens OX=9606 GN=SRRM2 PE=1 SV=2	SVSPC(BTD[C])SNVESR|	3|	0.37|	0.07234|	0.37	NA	3	1
Q9Y2K7	840	KDM2A	Q9Y2K7_840	KDM2A_HUMAN Lysine-specific demethylase 2A OS=Homo sapiens OX=9606 GN=KDM2A PE=1 SV=3	|VLVQHC(BTD[C])PAR	|1	|0.37	|NA	0.37	NA	1	1
P19338	543	NCL	P19338_543	NUCL_HUMAN Nucleolin OS=Homo sapiens OX=9606 GN=NCL PE=1 SV=3	EALNSC(BTD[C])NKR EALNSC(BTD[C])NK|EALNSC(BTD[C])NKR EALNSC(BTD[C])NK	6|4	0.43|0.305	0.18272|0.08813	0.3675	0.08839	10	2
Q14204	633	DYNC1H1	Q14204_633	DYHC1_HUMAN Cytoplasmic dynein 1 heavy chain 1 OS=Homo sapiens OX=9606 GN=DYNC1H1 PE=1 SV=5	VQYPQSQAC(BTD[C])K|VQYPQSQAC(BTD[C])K	4|3	0.3|0.43	0.01155|0.13317	0.365	0.09192	7	2
Q15021	286	NCAPD2	Q15021_286	CND1_HUMAN Condensin complex subunit 1 OS=Homo sapiens OX=9606 GN=NCAPD2 PE=1 SV=3	EIGQKC(BTD[C])PQELSR|EIGQKC(BTD[C])PQELSR	2|1	0.32|0.41	0.01414|NA	0.365	0.06364	3	2
Q9UQ80	296	PA2G4	Q9UQ80_296	PA2G4_HUMAN Proliferation-associated protein 2G4 OS=Homo sapiens OX=9606 GN=PA2G4 PE=1 SV=3	MGVVEC(BTD[C])AK|MGVVEC(BTD[C])AK	7|3	0.37|0.36	0.01134|0.00577	0.365	0.00707	10	2
O95373	736	IPO7	O95373_736	IPO7_HUMAN Importin-7 OS=Homo sapiens OX=9606 GN=IPO7 PE=1 SV=1	VLTGVAGEDAEC(BTD[C])HAAK|VLTGVAGEDAEC(BTD[C])HAAK	2|4	0.365|0.36	0.00707|0.01826	0.3625	0.00354	6	2
O43684	129	BUB3	O43684_129	BUB3_HUMAN Mitotic checkpoint protein BUB3 OS=Homo sapiens OX=9606 GN=BUB3 PE=1 SV=1	TPC(BTD[C])NAGTFSQPEK|	2|	0.36|	0.0|	0.36	NA	2	1
O60264	259	SMARCA5	O60264_259	SMCA5_HUMAN SWI/SNF-related matrix-associated actin-dependent regulator of chromatin subfamily A member 5 OS=Homo sapiens OX=9606 GN=SMARCA5 PE=1 SV=1	|SVC(BTD[C])LIGDK	|1	|0.36	|NA	0.36	NA	1	1
P22102	168	GART	P22102_168	PUR2_HUMAN Trifunctional purine biosynthetic protein adenosine-3 OS=Homo sapiens OX=9606 GN=GART PE=1 SV=1	|SKEEAC(BTD[C])K	|1	|0.36	|NA	0.36	NA	1	1
P55010	122	EIF5	P55010_122	IF5_HUMAN Eukaryotic translation initiation factor 5 OS=Homo sapiens OX=9606 GN=EIF5 PE=1 SV=2	KQTIGNSC(BTD[C])K QTIGNSC(BTD[C])K|KQTIGNSC(BTD[C])K QTIGNSC(BTD[C])K	4|2	0.39|0.33	0.04899|0.02828	0.36	0.04243	6	2
P56182	274	RRP1	P56182_274	RRP1_HUMAN Ribosomal RNA processing protein 1 homolog A OS=Homo sapiens OX=9606 GN=RRP1 PE=1 SV=1	|SEKPPAGSIC(BTD[C])R	|3	|0.36	|0.04163	0.36	NA	3	1
P62140	126	PPP1CB	P62140_126	PP1B_HUMAN Serine/threonine-protein phosphatase PP1-beta catalytic subunit OS=Homo sapiens OX=9606 GN=PPP1CB PE=1 SV=3	GNHEC(BTD[C])ASINR|	5|	0.36|	0.42933|	0.36	NA	5	1
P85037	665	FOXK1	P85037_665	FOXK1_HUMAN Forkhead box protein K1 OS=Homo sapiens OX=9606 GN=FOXK1 PE=1 SV=1	VC(BTD[C])EVGPK|	2|	0.36|	0.0|	0.36	NA	2	1
Q16576	166	RBBP7	Q16576_166	RBBP7_HUMAN Histone-binding protein RBBP7 OS=Homo sapiens OX=9606 GN=RBBP7 PE=1 SV=1	HPAKPDPSGEC(BTD[C])NPDLR|HPAKPDPSGEC(BTD[C])NPDLR	1|2	0.38|0.34	NA|0.0	0.36	0.02828	3	2
Q6UXN9	141	WDR82	Q6UXN9_141	WDR82_HUMAN WD repeat-containing protein 82 OS=Homo sapiens OX=9606 GN=WDR82 PE=1 SV=1	|SPNC(BTD[C])QGLMHLQGK	|1	|0.36	|NA	0.36	NA	1	1
Q92979	171	EMG1	Q92979_171	NEP1_HUMAN Ribosomal RNA small subunit methyltransferase NEP1 OS=Homo sapiens OX=9606 GN=EMG1 PE=1 SV=4	|NPVSDHFPVGC(BTD[C])MK	|1	|0.36	|NA	0.36	NA	1	1
Q96TA1	194	NIBAN2	Q96TA1_194	NIBA2_HUMAN Protein Niban 2 OS=Homo sapiens OX=9606 GN=NIBAN2 PE=1 SV=3	HC(BTD[C])NNGIPEDSK|HC(BTD[C])NNGIPEDSK	1|1	0.38|0.34	NA|NA	0.36	0.02828	2	2
Q9BQG0	942	MYBBP1A	Q9BQG0_942	MBB1A_HUMAN Myb-binding protein 1A OS=Homo sapiens OX=9606 GN=MYBBP1A PE=1 SV=2	GNTAEGC(BTD[C])VHETQEK|GNTAEGC(BTD[C])VHETQEK	2|1	0.46|0.26	0.0|NA	0.36	0.14142	3	2
Q9C0E8	149	LNPK	Q9C0E8_149	LNP_HUMAN Endoplasmic reticulum junction formation protein lunapark OS=Homo sapiens OX=9606 GN=LNPK PE=1 SV=2	|AKEC(BTD[C])EPPSAGAAVTAR	|2	|0.36	|0.0	0.36	NA	2	1
Q9NVI7	563	ATAD3A	Q9NVI7_563	ATD3A_HUMAN ATPase family AAA domain-containing protein 3A OS=Homo sapiens OX=9606 GN=ATAD3A PE=1 SV=2	KC(BTD[C])SEVAR|	2|	0.36|	0.0|	0.36	NA	2	1
Q9P258	337	RCC2	Q9P258_337	RCC2_HUMAN Protein RCC2 OS=Homo sapiens OX=9606 GN=RCC2 PE=1 SV=2	|DVAC(BTD[C])GANHTLVLDSQK	|1	|0.36	|NA	0.36	NA	1	1
Q9UKV3	733	ACIN1	Q9UKV3_733	ACINU_HUMAN Apoptotic chromatin condensation inducer in the nucleus OS=Homo sapiens OX=9606 GN=ACIN1 PE=1 SV=2	|KC(BTD[C])EAEEAEPPAATQPQTSETQTSHLPESER	|1	|0.36	|NA	0.36	NA	1	1
Q9UPN3	986	MACF1	Q9UPN3_986	MACF1_HUMAN Microtubule-actin cross-linking factor 1, isoforms 1/2/3/5 OS=Homo sapiens OX=9606 GN=MACF1 PE=1 SV=4	|SSAPGEC(BTD[C])HQIMK	|3	|0.36	|0.06557	0.36	NA	3	1
O76021	211	RSL1D1	O76021_211	RL1D1_HUMAN Ribosomal L1 domain-containing protein 1 OS=Homo sapiens OX=9606 GN=RSL1D1 PE=1 SV=3	SGSC(BTD[C])SAIR|SGSC(BTD[C])SAIR	2|2	0.435|0.28	0.00707|0.0	0.3575	0.1096	4	2
P11388	392	TOP2A	P11388_392	TOP2A_HUMAN DNA topoisomerase 2-alpha OS=Homo sapiens OX=9606 GN=TOP2A PE=1 SV=3	SFGSTC(BTD[C])QLSEK|SFGSTC(BTD[C])QLSEK	2|2	0.355|0.36	0.02121|0.01414	0.3575	0.00354	4	2
P32969	74	RPL9	P32969_74	RL9_HUMAN 60S ribosomal protein L9 OS=Homo sapiens OX=9606 GN=RPL9 PE=1 SV=1	TIC(BTD[C])SHVQNMIK|TIC(BTD[C])SHVQNMIK	2|1	0.365|0.35	0.03536|NA	0.3575	0.01061	3	2
P49327	1881	FASN	P49327_1881	FAS_HUMAN Fatty acid synthase OS=Homo sapiens OX=9606 GN=FASN PE=1 SV=3	TFC(BTD[C])PAHK|TFC(BTD[C])PAHK	5|3	0.38|0.33	0.16165|0.01155	0.355	0.03536	8	2
Q15393	1156	SF3B3	Q15393_1156	SF3B3_HUMAN Splicing factor 3B subunit 3 OS=Homo sapiens OX=9606 GN=SF3B3 PE=1 SV=4	SEHPPLC(BTD[C])GR|SEHPPLC(BTD[C])GR	5|5	0.37|0.34	0.12337|0.10826	0.355	0.02121	10	2
Q8TDN6	158	BRIX1	Q8TDN6_158	BRX1_HUMAN Ribosome biogenesis protein BRX1 homolog OS=Homo sapiens OX=9606 GN=BRIX1 PE=1 SV=2	|MTGNC(BTD[C])LK	|4	|0.355	|0.04717	0.355	NA	4	1
Q96P70	864	IPO9	Q96P70_864	IPO9_HUMAN Importin-9 OS=Homo sapiens OX=9606 GN=IPO9 PE=1 SV=3	|VSSVALC(BTD[C])K	|2	|0.355	|0.14849	0.355	NA	2	1
Q9P2E9	892	RRBP1	Q9P2E9_892	RRBP1_HUMAN Ribosome-binding protein 1 OS=Homo sapiens OX=9606 GN=RRBP1 PE=1 SV=5	ELC(BTD[C])HTQSSHASLR|ELC(BTD[C])HTQSSHASLR	1|1	0.34|0.37	NA|NA	0.355	0.02121	2	2
Q14152	198	EIF3A	Q14152_198	EIF3A_HUMAN Eukaryotic translation initiation factor 3 subunit A OS=Homo sapiens OX=9606 GN=EIF3A PE=1 SV=1	KLC(BTD[C])DNLR|KLC(BTD[C])DNLR	2|2	0.355|0.35	0.00707|0.01414	0.3525	0.00354	4	2
O75369	2154	FLNB	O75369_2154	FLNB_HUMAN Filamin-B OS=Homo sapiens OX=9606 GN=FLNB PE=1 SV=2	NSHC(BTD[C])VR|NSHC(BTD[C])VR	1|1	0.34|0.36	NA|NA	0.35	0.01414	2	2
O75884	39	RBBP9	O75884_39	RBBP9_HUMAN Serine hydrolase RBBP9 OS=Homo sapiens OX=9606 GN=RBBP9 PE=1 SV=2	IPGFQC(BTD[C])LAK|	1|	0.35|	NA|	0.35	NA	1	1
P24666	63	ACP1	P24666_63	PPAC_HUMAN Low molecular weight phosphotyrosine protein phosphatase OS=Homo sapiens OX=9606 GN=ACP1 PE=1 SV=3	GQSC(BTD[C])MK|GQSC(BTD[C])MK	2|2	0.35|0.35	0.0|0.0	0.35	0	4	2
P31943	122	HNRNPH1	P31943_122	HNRH1_HUMAN Heterogeneous nuclear ribonucleoprotein H OS=Homo sapiens OX=9606 GN=HNRNPH1 PE=1 SV=4	GLPFGC(BTD[C])SK|	1|	0.35|	NA|	0.35	NA	1	1
P46013	3229	MKI67	P46013_3229	KI67_HUMAN Proliferation marker protein Ki-67 OS=Homo sapiens OX=9606 GN=MKI67 PE=1 SV=2	|RC(BTD[C])AENPK	|1	|0.35	|NA	0.35	NA	1	1
P55060	939	CSE1L	P55060_939	XPO2_HUMAN Exportin-2 OS=Homo sapiens OX=9606 GN=CSE1L PE=1 SV=3	LSTAC(BTD[C])PGR|LSTAC(BTD[C])PGR	3|2	0.38|0.32	0.0611|0.0	0.35	0.04243	5	2
P62316	46	SNRPD2	P62316_46	SMD2_HUMAN Small nuclear ribonucleoprotein Sm D2 OS=Homo sapiens OX=9606 GN=SNRPD2 PE=1 SV=1	NNTQVLINC(BTD[C])R|NNTQVLINC(BTD[C])R	1|1	0.37|0.33	NA|NA	0.35	0.02828	2	2
P63000	178	RAC1	P63000_178	RAC1_HUMAN Ras-related C3 botulinum toxin substrate 1 OS=Homo sapiens OX=9606 GN=RAC1 PE=1 SV=1	AVLC(BTD[C])PPPVK|AVLC(BTD[C])PPPVK	8|5	0.36|0.34	0.08345|0.28858	0.35	0.01414	13	2
Q01518	93	CAP1	Q01518_93	CAP1_HUMAN Adenylyl cyclase-associated protein 1 OS=Homo sapiens OX=9606 GN=CAP1 PE=1 SV=5	ALLVTASQC(BTD[C])QQPAENK|ALLVTASQC(BTD[C])QQPAENK	1|2	0.33|0.37	NA|0.0	0.35	0.02828	3	2
Q07955	16	SRSF1	Q07955_16	SRSF1_HUMAN Serine/arginine-rich splicing factor 1 OS=Homo sapiens OX=9606 GN=SRSF1 PE=1 SV=2	GPAGNNDC(BTD[C])R|GPAGNNDC(BTD[C])R	2|3	0.34|0.36	0.0|0.14224	0.35	0.01414	5	2
Q12906	203	ILF3	Q12906_203	ILF3_HUMAN Interleukin enhancer-binding factor 3 OS=Homo sapiens OX=9606 GN=ILF3 PE=1 SV=3	QKC(BTD[C])LAALASLR|	2|	0.35|	0.0|	0.35	NA	2	1
Q12931	261	TRAP1	Q12931_261	TRAP1_HUMAN Heat shock protein 75 kDa, mitochondrial OS=Homo sapiens OX=9606 GN=TRAP1 PE=1 SV=3	SDC(BTD[C])KEFSSEAR|	2|	0.35|	0.0|	0.35	NA	2	1
Q14739	591	LBR	Q14739_591	LBR_HUMAN Delta(14)-sterol reductase LBR OS=Homo sapiens OX=9606 GN=LBR PE=1 SV=2	|DEYHC(BTD[C])K	|1	|0.35	|NA	0.35	NA	1	1
Q14980	80	NUMA1	Q14980_80	NUMA1_HUMAN Nuclear mitotic apparatus protein 1 OS=Homo sapiens OX=9606 GN=NUMA1 PE=1 SV=2	|KHPSSPEC(BTD[C])LVSAQK	|1	|0.35	|NA	0.35	NA	1	1
Q16555	248	DPYSL2	Q16555_248	DPYL2_HUMAN Dihydropyrimidinase-related protein 2 OS=Homo sapiens OX=9606 GN=DPYSL2 PE=1 SV=1	AITIANQTNC(BTD[C])PLYITK|	1|	0.35|	NA|	0.35	NA	1	1
Q8NBX0	361	SCCPDH	Q8NBX0_361	SCPDL_HUMAN Saccharopine dehydrogenase-like oxidoreductase OS=Homo sapiens OX=9606 GN=SCCPDH PE=1 SV=1	|IC(BTD[C])TQVK	|1	|0.35	|NA	0.35	NA	1	1
Q92615	633	LARP4B	Q92615_633	LAR4B_HUMAN La-related protein 4B OS=Homo sapiens OX=9606 GN=LARP4B PE=1 SV=3	LPSALTATAC(BTD[C])K|	1|	0.35|	NA|	0.35	NA	1	1
Q99615	175	DNAJC7	Q99615_175	DNJC7_HUMAN DnaJ homolog subfamily C member 7 OS=Homo sapiens OX=9606 GN=DNAJC7 PE=1 SV=2	ALEFAPAC(BTD[C])HR|	2|	0.35|	0.0|	0.35	NA	2	1
Q9BZE4	336	GTPBP4	Q9BZE4_336	NOG1_HUMAN Nucleolar GTP-binding protein 1 OS=Homo sapiens OX=9606 GN=GTPBP4 PE=1 SV=3	|VKTEAC(BTD[C])DR	|1	|0.35	|NA	0.35	NA	1	1
Q9H1J1	420	UPF3A	Q9H1J1_420	REN3A_HUMAN Regulator of nonsense transcripts 3A OS=Homo sapiens OX=9606 GN=UPF3A PE=1 SV=1	AQRC(BTD[C])DDSPAPR|	1|	0.35|	NA|	0.35	NA	1	1
Q9NZM1	409	MYOF	Q9NZM1_409	MYOF_HUMAN Myoferlin OS=Homo sapiens OX=9606 GN=MYOF PE=1 SV=1	KVC(BTD[C])TNIIEK|KVC(BTD[C])TNIIEK	2|1	0.305|0.39	0.02121|NA	0.3475	0.0601	3	2
Q01780	852	EXOSC10	Q01780_852	EXOSX_HUMAN Exosome component 10 OS=Homo sapiens OX=9606 GN=EXOSC10 PE=1 SV=2	KC(BTD[C])IAAK|KC(BTD[C])IAAK	3|2	0.32|0.37	0.01155|0.04243	0.345	0.03536	5	2
Q99700	892	ATXN2	Q99700_892	ATX2_HUMAN Ataxin-2 OS=Homo sapiens OX=9606 GN=ATXN2 PE=1 SV=2	RGPEVTSQGVQTSSPAC(BTD[C])K|RGPEVTSQGVQTSSPAC(BTD[C])K	1|1	0.31|0.38	NA|NA	0.345	0.0495	2	2
P55060	842	CSE1L	P55060_842	XPO2_HUMAN Exportin-2 OS=Homo sapiens OX=9606 GN=CSE1L PE=1 SV=3	KIC(BTD[C])AVGITK IC(BTD[C])AVGITK|KIC(BTD[C])AVGITK IC(BTD[C])AVGITK	8|7	0.395|0.29	0.12626|0.38843	0.3425	0.07425	15	2
O00567	142	NOP56	O00567_142	NOP56_HUMAN Nucleolar protein 56 OS=Homo sapiens OX=9606 GN=NOP56 PE=1 SV=4	|GLTDLSAC(BTD[C])K	|1	|0.34	|NA	0.34	NA	1	1
O75380	87	NDUFS6	O75380_87	NDUS6_HUMAN NADH dehydrogenase [ubiquinone] iron-sulfur protein 6, mitochondrial OS=Homo sapiens OX=9606 GN=NDUFS6 PE=1 SV=1	|VIAC(BTD[C])DGGGGALGHPK	|1	|0.34	|NA	0.34	NA	1	1
P09382	17	LGALS1	P09382_17	LEG1_HUMAN Galectin-1 OS=Homo sapiens OX=9606 GN=LGALS1 PE=1 SV=2	LKPGEC(BTD[C])LR|	1|	0.34|	NA|	0.34	NA	1	1
P10398	538	ARAF	P10398_538	ARAF_HUMAN Serine/threonine-protein kinase A-Raf OS=Homo sapiens OX=9606 GN=ARAF PE=1 SV=2	|ISSNC(BTD[C])PK	|1	|0.34	|NA	0.34	NA	1	1
P13674	503	P4HA1	P13674_503	P4HA1_HUMAN Prolyl 4-hydroxylase subunit alpha-1 OS=Homo sapiens OX=9606 GN=P4HA1 PE=1 SV=2	HAAC(BTD[C])PVLVGNK|HAAC(BTD[C])PVLVGNK	1|2	0.34|0.34	NA|0.04243	0.34	0	3	2
P26022	103	PTX3	P26022_103	PTX3_HUMAN Pentraxin-related protein PTX3 OS=Homo sapiens OX=9606 GN=PTX3 PE=1 SV=3	LAESLARPC(BTD[C])APGAPAEAR|	1|	0.34|	NA|	0.34	NA	1	1
P60981	46	DSTN	P60981_46	DEST_HUMAN Destrin OS=Homo sapiens OX=9606 GN=DSTN PE=1 SV=3	|KC(BTD[C])IIVEEGK	|1	|0.34	|NA	0.34	NA	1	1
Q02878	44	RPL6	Q02878_44	RL6_HUMAN 60S ribosomal protein L6 OS=Homo sapiens OX=9606 GN=RPL6 PE=1 SV=3	GKPHC(BTD[C])SR|GKPHC(BTD[C])SR	2|1	0.35|0.33	0.01414|NA	0.34	0.01414	3	2
Q14318	227	FKBP8	Q14318_227	FKBP8_HUMAN Peptidyl-prolyl cis-trans isomerase FKBP8 OS=Homo sapiens OX=9606 GN=FKBP8 PE=1 SV=2	EC(BTD[C])GNAHYQR|	1|	0.34|	NA|	0.34	NA	1	1
Q6I9Y2	90	THOC7	Q6I9Y2_90	THOC7_HUMAN THO complex subunit 7 homolog OS=Homo sapiens OX=9606 GN=THOC7 PE=1 SV=3	|EIEC(BTD[C])SIAGAHEK	|1	|0.34	|NA	0.34	NA	1	1
Q92621	1028	NUP205	Q92621_1028	NU205_HUMAN Nuclear pore complex protein Nup205 OS=Homo sapiens OX=9606 GN=NUP205 PE=1 SV=3	KPVSTTNLQDPGVLGC(BTD[C])PR|	1|	0.34|	NA|	0.34	NA	1	1
Q9NQZ5	362	STARD7	Q9NQZ5_362	STAR7_HUMAN StAR-related lipid transfer protein 7, mitochondrial OS=Homo sapiens OX=9606 GN=STARD7 PE=1 SV=2	|KNEGSC(BTD[C])GPAR	|1	|0.34	|NA	0.34	NA	1	1
Q9NX74	154	DUS2	Q9NX74_154	DUS2L_HUMAN tRNA-dihydrouridine(20) synthase [NAD(P)+]-like OS=Homo sapiens OX=9606 GN=DUS2 PE=1 SV=1	|RPVTC(BTD[C])K	|1	|0.34	|NA	0.34	NA	1	1
Q9UQE7	972	SMC3	Q9UQE7_972	SMC3_HUMAN Structural maintenance of chromosomes protein 3 OS=Homo sapiens OX=9606 GN=SMC3 PE=1 SV=2	KLEQC(BTD[C])NTELK|KLEQC(BTD[C])NTELKK	1|1	0.38|0.3	NA|NA	0.34	0.05657	2	2
Q9Y490	1023	TLN1	Q9Y490_1023	TLN1_HUMAN Talin-1 OS=Homo sapiens OX=9606 GN=TLN1 PE=1 SV=3	ASVPTIQDQASAMQLSQC(BTD[C])AK|	1|	0.34|	NA|	0.34	NA	1	1
Q9Y6I3	96	EPN1	Q9Y6I3_96	EPN1_HUMAN Epsin-1 OS=Homo sapiens OX=9606 GN=EPN1 PE=1 SV=2	|VSQQC(BTD[C])K	|2	|0.34	|0.0	0.34	NA	2	1
O75976	1049	CPD	O75976_1049	CBPD_HUMAN Carboxypeptidase D OS=Homo sapiens OX=9606 GN=CPD PE=1 SV=2	|AQEKDC(BTD[C])TSK	|2	|0.335	|0.03536	0.335	NA	2	1
P38606	394	ATP6V1A	P38606_394	VATA_HUMAN V-type proton ATPase catalytic subunit A OS=Homo sapiens OX=9606 GN=ATP6V1A PE=1 SV=2	VKC(BTD[C])LGNPER|	2|	0.335|	0.03536|	0.335	NA	2	1
P62913	150	RPL11	P62913_150	RL11_HUMAN 60S ribosomal protein L11 OS=Homo sapiens OX=9606 GN=RPL11 PE=1 SV=2	TGC(BTD[C])IGAK|TGC(BTD[C])IGAK	1|2	0.32|0.35	NA|0.0	0.335	0.02121	3	2
Q15257	103	PTPA	Q15257_103	PTPA_HUMAN Serine/threonine-protein phosphatase 2A activator OS=Homo sapiens OX=9606 GN=PTPA PE=1 SV=3	|AGHC(BTD[C])APSEAIEK	|2	|0.335	|0.02121	0.335	NA	2	1
Q8IZ81	29	ELMOD2	Q8IZ81_29	ELMD2_HUMAN ELMO domain-containing protein 2 OS=Homo sapiens OX=9606 GN=ELMOD2 PE=1 SV=1	QMTGKC(BTD[C])ELQR|	2|	0.335|	0.0495|	0.335	NA	2	1
Q9UPN3	4825	MACF1	Q9UPN3_4825	MACF1_HUMAN Microtubule-actin cross-linking factor 1, isoforms 1/2/3/5 OS=Homo sapiens OX=9606 GN=MACF1 PE=1 SV=4	NC(BTD[C])PISAK|NC(BTD[C])PISAK	2|2	0.37|0.3	0.07071|0.0	0.335	0.0495	4	2
O00154	92	ACOT7	O00154_92	BACH_HUMAN Cytosolic acyl coenzyme A thioester hydrolase OS=Homo sapiens OX=9606 GN=ACOT7 PE=1 SV=3	HC(BTD[C])NSQNGER|	3|	0.33|	0.02887|	0.33	NA	3	1
O60343	74	TBC1D4	O60343_74	TBCD4_HUMAN TBC1 domain family member 4 OS=Homo sapiens OX=9606 GN=TBC1D4 PE=1 SV=2	SQKPEAGGC(BTD[C])GAPAAR|	1|	0.33|	NA|	0.33	NA	1	1
P24534	50	EEF1B2	P24534_50	EF1B_HUMAN Elongation factor 1-beta OS=Homo sapiens OX=9606 GN=EEF1B2 PE=1 SV=3	VSSPPPADLC(BTD[C])HALR|	1|	0.33|	NA|	0.33	NA	1	1
P43243	821	MATR3	P43243_821	MATR3_HUMAN Matrin-3 OS=Homo sapiens OX=9606 GN=MATR3 PE=1 SV=2	NTHC(BTD[C])SSLPHYQK|NTHC(BTD[C])SSLPHYQK	1|2	0.33|0.33	NA|0.0	0.33	0	3	2
P48444	286	ARCN1	P48444_286	COPD_HUMAN Coatomer subunit delta OS=Homo sapiens OX=9606 GN=ARCN1 PE=1 SV=1	ITLTC(BTD[C])GR|	1|	0.33|	NA|	0.33	NA	1	1
P49792	2982	RANBP2	P49792_2982	RBP2_HUMAN E3 SUMO-protein ligase RanBP2 OS=Homo sapiens OX=9606 GN=RANBP2 PE=1 SV=2	VC(BTD[C])ANHVITK|VC(BTD[C])ANHVITK	4|1	0.29|0.37	0.005|NA	0.33	0.05657	5	2
P62249	25	RPS16	P62249_25	RS16_HUMAN 40S ribosomal protein S16 OS=Homo sapiens OX=9606 GN=RPS16 PE=1 SV=2	|TATAVAHC(BTD[C])K	|2	|0.33	|0.01414	0.33	NA	2	1
P62820	126	RAB1A	P62820_126	RAB1A_HUMAN Ras-related protein Rab-1A OS=Homo sapiens OX=9606 GN=RAB1A PE=1 SV=3	LLVGNKC(BTD[C])DLTTK|	3|	0.33|	0.02|	0.33	NA	3	1
Q14980	735	NUMA1	Q14980_735	NUMA1_HUMAN Nuclear mitotic apparatus protein 1 OS=Homo sapiens OX=9606 GN=NUMA1 PE=1 SV=2	AADALEEQQRC(BTD[C])ISELK|	1|	0.33|	NA|	0.33	NA	1	1
Q15311	451	RALBP1	Q15311_451	RBP1_HUMAN RalA-binding protein 1 OS=Homo sapiens OX=9606 GN=RALBP1 PE=1 SV=3	RQEC(BTD[C])ETK|RQEC(BTD[C])ETK	1|1	0.31|0.35	NA|NA	0.33	0.02828	2	2
Q7Z6Z7	19	HUWE1	Q7Z6Z7_19	HUWE1_HUMAN E3 ubiquitin-protein ligase HUWE1 OS=Homo sapiens OX=9606 GN=HUWE1 PE=1 SV=3	|KTPTEAPADC(BTD[C])R	|1	|0.33	|NA	0.33	NA	1	1
Q8IY18	760	SMC5	Q8IY18_760	SMC5_HUMAN Structural maintenance of chromosomes protein 5 OS=Homo sapiens OX=9606 GN=SMC5 PE=1 SV=2	IC(BTD[C])TSLHIQK|	1|	0.33|	NA|	0.33	NA	1	1
Q96N67	1902	DOCK7	Q96N67_1902	DOCK7_HUMAN Dedicator of cytokinesis protein 7 OS=Homo sapiens OX=9606 GN=DOCK7 PE=1 SV=4	DSNPVDKC(BTD[C])K|DSNPVDKC(BTD[C])K	2|1	0.37|0.29	0.11314|NA	0.33	0.05657	3	2
Q9BY44	119	EIF2A	Q9BY44_119	EIF2A_HUMAN Eukaryotic translation initiation factor 2A OS=Homo sapiens OX=9606 GN=EIF2A PE=1 SV=3	TGTC(BTD[C])LK|	2|	0.33|	0.0|	0.33	NA	2	1
Q9BYC9	53	MRPL20	Q9BYC9_53	RM20_HUMAN 39S ribosomal protein L20, mitochondrial OS=Homo sapiens OX=9606 GN=MRPL20 PE=1 SV=1	|AFVKC(BTD[C])TK	|1	|0.33	|NA	0.33	NA	1	1
Q9H3U1	67	UNC45A	Q9H3U1_67	UN45A_HUMAN Protein unc-45 homolog A OS=Homo sapiens OX=9606 GN=UNC45A PE=1 SV=1	AAC(BTD[C])HLK|AAC(BTD[C])HLK	2|1	0.33|0.33	0.0|NA	0.33	0	3	2
Q9P2T1	186	GMPR2	Q9P2T1_186	GMPR2_HUMAN GMP reductase 2 OS=Homo sapiens OX=9606 GN=GMPR2 PE=1 SV=1	|VGIGPGSVC(BTD[C])TTR	|1	|0.33	|NA	0.33	NA	1	1
Q9UG63	186	ABCF2	Q9UG63_186	ABCF2_HUMAN ATP-binding cassette sub-family F member 2 OS=Homo sapiens OX=9606 GN=ABCF2 PE=1 SV=2	LAHEDAEC(BTD[C])EK|LAHEDAEC(BTD[C])EK	1|1	0.38|0.28	NA|NA	0.33	0.07071	2	2
Q9Y6A5	662	TACC3	Q9Y6A5_662	TACC3_HUMAN Transforming acidic coiled-coil-containing protein 3 OS=Homo sapiens OX=9606 GN=TACC3 PE=1 SV=1	SRC(BTD[C])EELHGK|	1|	0.33|	NA|	0.33	NA	1	1
O75533	1244	SF3B1	O75533_1244	SF3B1_HUMAN Splicing factor 3B subunit 1 OS=Homo sapiens OX=9606 GN=SF3B1 PE=1 SV=3	VAIGPC(BTD[C])R|VAIGPC(BTD[C])R	2|3	0.32|0.33	0.0|0.02887	0.325	0.00707	5	2
P45974	471	USP5	P45974_471	UBP5_HUMAN Ubiquitin carboxyl-terminal hydrolase 5 OS=Homo sapiens OX=9606 GN=USP5 PE=1 SV=2	IKC(BTD[C])LATEK|IKC(BTD[C])LATEK	1|3	0.33|0.32	NA|0.14154	0.325	0.00707	4	2
P48444	9	ARCN1	P48444_9	COPD_HUMAN Coatomer subunit delta OS=Homo sapiens OX=9606 GN=ARCN1 PE=1 SV=1	VLLAAAVC(BTD[C])TK|VLLAAAVC(BTD[C])TK	1|1	0.29|0.36	NA|NA	0.325	0.0495	2	2
Q96EP5	85	DAZAP1	Q96EP5_85	DAZP1_HUMAN DAZ-associated protein 1 OS=Homo sapiens OX=9606 GN=DAZAP1 PE=1 SV=1	NIDPKPC(BTD[C])TPR|NIDPKPC(BTD[C])TPR	3|4	0.33|0.32	0.05196|0.02309	0.325	0.00707	7	2
Q9H307	249	PNN	Q9H307_249	PININ_HUMAN Pinin OS=Homo sapiens OX=9606 GN=PNN PE=1 SV=5	MC(BTD[C])PATQK|	2|	0.325|	0.03536|	0.325	NA	2	1
Q9NYH9	175	UTP6	Q9NYH9_175	UTP6_HUMAN U3 small nucleolar RNA-associated protein 6 homolog OS=Homo sapiens OX=9606 GN=UTP6 PE=2 SV=2	FHPEC(BTD[C])PK|FHPEC(BTD[C])PK	2|3	0.33|0.32	0.02828|0.00577	0.325	0.00707	5	2
O00232	31	PSMD12	O00232_31	PSD12_HUMAN 26S proteasome non-ATPase regulatory subunit 12 OS=Homo sapiens OX=9606 GN=PSMD12 PE=1 SV=3	LPEC(BTD[C])AK|LPEC(BTD[C])AK	2|1	0.315|0.33	0.07778|NA	0.3225	0.01061	3	2
O14818	91	PSMA7	O14818_91	PSA7_HUMAN Proteasome subunit alpha type-7 OS=Homo sapiens OX=9606 GN=PSMA7 PE=1 SV=1	VEC(BTD[C])QSHR|VEC(BTD[C])QSHR	3|4	0.37|0.275	0.07767|0.02062	0.3225	0.06718	7	2
O00116	552	AGPS	O00116_552	ADAS_HUMAN Alkyldihydroxyacetonephosphate synthase, peroxisomal OS=Homo sapiens OX=9606 GN=AGPS PE=1 SV=1	|ITREC(BTD[C])K	|1	|0.32	|NA	0.32	NA	1	1
P04183	206	TK1	P04183_206	KITH_HUMAN Thymidine kinase, cytosolic OS=Homo sapiens OX=9606 GN=TK1 PE=1 SV=2	|ASGQPAGPDNKENC(BTD[C])PVPGKPGEAVAAR	|1	|0.32	|NA	0.32	NA	1	1
P14866	452	HNRNPL	P14866_452	HNRPL_HUMAN Heterogeneous nuclear ribonucleoprotein L OS=Homo sapiens OX=9606 GN=HNRNPL PE=1 SV=2	|LNVC(BTD[C])VSK	|1	|0.32	|NA	0.32	NA	1	1
P31321	347	PRKAR1B	P31321_347	KAP1_HUMAN cAMP-dependent protein kinase type I-beta regulatory subunit OS=Homo sapiens OX=9606 GN=PRKAR1B PE=1 SV=4	|GPLKC(BTD[C])VK	|1	|0.32	|NA	0.32	NA	1	1
P52948	1347	NUP98	P52948_1347	NUP98_HUMAN Nuclear pore complex protein Nup98-Nup96 OS=Homo sapiens OX=9606 GN=NUP98 PE=1 SV=4	ISEAC(BTD[C])SLAQQSGDHR|	2|	0.32|	0.0|	0.32	NA	2	1
P62633	87	CNBP	P62633_87	CNBP_HUMAN Cellular nucleic acid-binding protein OS=Homo sapiens OX=9606 GN=CNBP PE=1 SV=1	GGHIAKDC(BTD[C])K|	1|	0.32|	NA|	0.32	NA	1	1
Q13347	76	EIF3I	Q13347_76	EIF3I_HUMAN Eukaryotic translation initiation factor 3 subunit I OS=Homo sapiens OX=9606 GN=EIF3I PE=1 SV=1	HVLTGSADNSC(BTD[C])R|HVLTGSADNSC(BTD[C])R	1|2	0.27|0.37	NA|0.05657	0.32	0.07071	3	2
Q15149	4574	PLEC	Q15149_4574	PLEC_HUMAN Plectin OS=Homo sapiens OX=9606 GN=PLEC PE=1 SV=3	|YLTC(BTD[C])PK	|1	|0.32	|NA	0.32	NA	1	1
Q16831	17	UPP1	Q16831_17	UPP1_HUMAN Uridine phosphorylase 1 OS=Homo sapiens OX=9606 GN=UPP1 PE=1 SV=1	AESHNDC(BTD[C])PVR|	1|	0.32|	NA|	0.32	NA	1	1
Q8WZA9	373	IRGQ	Q8WZA9_373	IRGQ_HUMAN Immunity-related GTPase family Q protein OS=Homo sapiens OX=9606 GN=IRGQ PE=1 SV=1	|EKC(BTD[C])SAGSQK	|3	|0.32	|0.74478	0.32	NA	3	1
Q92879	119	CELF1	Q92879_119	CELF1_HUMAN CUGBP Elav-like family member 1 OS=Homo sapiens OX=9606 GN=CELF1 PE=1 SV=2	|KC(BTD[C])TENDIR	|1	|0.32	|NA	0.32	NA	1	1
Q96EV8	302	DTNBP1	Q96EV8_302	DTBP1_HUMAN Dysbindin OS=Homo sapiens OX=9606 GN=DTNBP1 PE=1 SV=1	|AKPPSSSSTC(BTD[C])TDSATR	|1	|0.32	|NA	0.32	NA	1	1
Q96N67	2125	DOCK7	Q96N67_2125	DOCK7_HUMAN Dedicator of cytokinesis protein 7 OS=Homo sapiens OX=9606 GN=DOCK7 PE=1 SV=4	AVLPVTC(BTD[C])HR|	1|	0.32|	NA|	0.32	NA	1	1
Q9BQG0	1031	MYBBP1A	Q9BQG0_1031	MBB1A_HUMAN Myb-binding protein 1A OS=Homo sapiens OX=9606 GN=MYBBP1A PE=1 SV=2	|HQAC(BTD[C])LLLQK	|1	|0.32	|NA	0.32	NA	1	1
Q9BXP5	490	SRRT	Q9BXP5_490	SRRT_HUMAN Serrate RNA effector molecule homolog OS=Homo sapiens OX=9606 GN=SRRT PE=1 SV=1	LREC(BTD[C])ELSPGVNR|LREC(BTD[C])ELSPGVNR	1|1	0.29|0.35	NA|NA	0.32	0.04243	2	2
Q9BZJ0	603	CRNKL1	Q9BZJ0_603	CRNL1_HUMAN Crooked neck-like protein 1 OS=Homo sapiens OX=9606 GN=CRNKL1 PE=1 SV=4	ALGTSIGKC(BTD[C])PK|	1|	0.32|	NA|	0.32	NA	1	1
Q9H488	140	POFUT1	Q9H488_140	OFUT1_HUMAN GDP-fucose protein O-fucosyltransferase 1 OS=Homo sapiens OX=9606 GN=POFUT1 PE=1 SV=1	|KTC(BTD[C])PMK	|2	|0.32	|0.0	0.32	NA	2	1
Q9NYF8	688	BCLAF1	Q9NYF8_688	BCLF1_HUMAN Bcl-2-associated transcription factor 1 OS=Homo sapiens OX=9606 GN=BCLAF1 PE=1 SV=2	LRC(BTD[C])DSADLR|	1|	0.32|	NA|	0.32	NA	1	1
Q9UHD1	157	CHORDC1	Q9UHD1_157	CHRD1_HUMAN Cysteine and histidine-rich domain-containing protein 1 OS=Homo sapiens OX=9606 GN=CHORDC1 PE=1 SV=2	IGTSC(BTD[C])K|	2|	0.32|	0.0|	0.32	NA	2	1
Q9UKV3	546	ACIN1	Q9UKV3_546	ACINU_HUMAN Apoptotic chromatin condensation inducer in the nucleus OS=Homo sapiens OX=9606 GN=ACIN1 PE=1 SV=2	GITEEC(BTD[C])LKQPSLEQK|	1|	0.32|	NA|	0.32	NA	1	1
Q9UMY4	67	SNX12	Q9UMY4_67	SNX12_HUMAN Sorting nexin-12 OS=Homo sapiens OX=9606 GN=SNX12 PE=1 SV=4	LKESC(BTD[C])VR|	1|	0.32|	NA|	0.32	NA	1	1
Q9Y383	348	LUC7L2	Q9Y383_348	LC7L2_HUMAN Putative RNA-binding protein Luc7-like 2 OS=Homo sapiens OX=9606 GN=LUC7L2 PE=1 SV=2	FRDQDLASC(BTD[C])DR|	1|	0.32|	NA|	0.32	NA	1	1
Q9ULV4	330	CORO1C	Q9ULV4_330	COR1C_HUMAN Coronin-1C OS=Homo sapiens OX=9606 GN=CORO1C PE=1 SV=1	GLDVNKC(BTD[C])EIAR|GLDVNKC(BTD[C])EIAR	2|2	0.32|0.315	0.0|0.00707	0.3175	0.00354	4	2
P35914	323	HMGCL	P35914_323	HMGCL_HUMAN Hydroxymethylglutaryl-CoA lyase, mitochondrial OS=Homo sapiens OX=9606 GN=HMGCL PE=1 SV=2	|VAQATC(BTD[C])K	|2	|0.315	|0.00707	0.315	NA	2	1
P51610	1872	HCFC1	P51610_1872	HCFC1_HUMAN Host cell factor 1 OS=Homo sapiens OX=9606 GN=HCFC1 PE=1 SV=2	VAGINAC(BTD[C])GR|VAGINAC(BTD[C])GR	1|1	0.36|0.27	NA|NA	0.315	0.06364	2	2
O00231	289	PSMD11	O00231_289	PSD11_HUMAN 26S proteasome non-ATPase regulatory subunit 11 OS=Homo sapiens OX=9606 GN=PSMD11 PE=1 SV=3	QTEALKC(BTD[C])VAQASK|	4|	0.31|	0.3667|	0.31	NA	4	1
O43175	234	PHGDH	O43175_234	SERA_HUMAN D-3-phosphoglycerate dehydrogenase OS=Homo sapiens OX=9606 GN=PHGDH PE=1 SV=4	|VVNC(BTD[C])AR	|1	|0.31	|NA	0.31	NA	1	1
O75534	506	CSDE1	O75534_506	CSDE1_HUMAN Cold shock domain-containing protein E1 OS=Homo sapiens OX=9606 GN=CSDE1 PE=1 SV=2	QRPGQQVATC(BTD[C])VR|	1|	0.31|	NA|	0.31	NA	1	1
P05026	175	ATP1B1	P05026_175	AT1B1_HUMAN Sodium/potassium-transporting ATPase subunit beta-1 OS=Homo sapiens OX=9606 GN=ATP1B1 PE=1 SV=1	EGKPC(BTD[C])IIIK|	1|	0.31|	NA|	0.31	NA	1	1
P22059	609	OSBP	P22059_609	OSBP1_HUMAN Oxysterol-binding protein 1 OS=Homo sapiens OX=9606 GN=OSBP PE=1 SV=1	|TGDKC(BTD[C])NLK	|2	|0.31	|0.05657	0.31	NA	2	1
P24928	1050	POLR2A	P24928_1050	RPB1_HUMAN DNA-directed RNA polymerase II subunit RPB1 OS=Homo sapiens OX=9606 GN=POLR2A PE=1 SV=2	|STLC(BTD[C])SR	|1	|0.31	|NA	0.31	NA	1	1
P46013	3241	MKI67	P46013_3241	KI67_HUMAN Proliferation marker protein Ki-67 OS=Homo sapiens OX=9606 GN=MKI67 PE=1 SV=2	|KAEDNVC(BTD[C])VK	|2	|0.31	|0.01414	0.31	NA	2	1
P49915	523	GMPS	P49915_523	GUAA_HUMAN GMP synthase [glutamine-hydrolyzing] OS=Homo sapiens OX=9606 GN=GMPS PE=1 SV=1	|TVGVQGDC(BTD[C])R	|1	|0.31	|NA	0.31	NA	1	1
P50914	42	RPL14	P50914_42	RL14_HUMAN 60S ribosomal protein L14 OS=Homo sapiens OX=9606 GN=RPL14 PE=1 SV=4	|ALVDGPC(BTD[C])TQVR	|1	|0.31	|NA	0.31	NA	1	1
Q13501	113	SQSTM1	Q13501_113	SQSTM_HUMAN Sequestosome-1 OS=Homo sapiens OX=9606 GN=SQSTM1 PE=1 SV=1	|DHRPPC(BTD[C])AQEAPR	|1	|0.31	|NA	0.31	NA	1	1
Q71RC2	224	LARP4	Q71RC2_224	LARP4_HUMAN La-related protein 4 OS=Homo sapiens OX=9606 GN=LARP4 PE=1 SV=3	|SENC(BTD[C])PK	|1	|0.31	|NA	0.31	NA	1	1
Q96SB3	272	PPP1R9B	Q96SB3_272	NEB2_HUMAN Neurabin-2 OS=Homo sapiens OX=9606 GN=PPP1R9B PE=1 SV=3	|ERC(BTD[C])PAGQQPPQHR	|2	|0.31	|0.07071	0.31	NA	2	1
Q9UBE0	146	SAE1	Q9UBE0_146	SAE1_HUMAN SUMO-activating enzyme subunit 1 OS=Homo sapiens OX=9606 GN=SAE1 PE=1 SV=1	VDQIC(BTD[C])HK|	1|	0.31|	NA|	0.31	NA	1	1
P63220	17	RPS21	P63220_17	RS21_HUMAN 40S ribosomal protein S21 OS=Homo sapiens OX=9606 GN=RPS21 PE=1 SV=1	KC(BTD[C])SASNR C(BTD[C])SASNR|KC(BTD[C])SASNR	6|5	0.285|0.33	0.08424|0.06928	0.3075	0.03182	11	2
P32969	134	RPL9	P32969_134	RL9_HUMAN 60S ribosomal protein L9 OS=Homo sapiens OX=9606 GN=RPL9 PE=1 SV=1	MRPGVAC(BTD[C])SVSQAQK|MRPGVAC(BTD[C])SVSQAQK	9|6	0.31|0.3	0.13327|0.08091	0.305	0.00707	15	2
P35579	1437	MYH9	P35579_1437	MYH9_HUMAN Myosin-9 OS=Homo sapiens OX=9606 GN=MYH9 PE=1 SV=4	QSAC(BTD[C])NLEK|QSAC(BTD[C])NLEK	2|4	0.345|0.265	0.13435|0.00957	0.305	0.05657	6	2
Q5SW79	776	CEP170	Q5SW79_776	CE170_HUMAN Centrosomal protein of 170 kDa OS=Homo sapiens OX=9606 GN=CEP170 PE=1 SV=1	|NVSGQTDKC(BTD[C])R	|2	|0.305	|0.0495	0.305	NA	2	1
Q9BZQ8	516	NIBAN1	Q9BZQ8_516	NIBA1_HUMAN Protein Niban 1 OS=Homo sapiens OX=9606 GN=NIBAN1 PE=1 SV=1	ALASTC(BTD[C])KPELQK|ALASTC(BTD[C])KPELQK	1|3	0.3|0.31	NA|0.00577	0.305	0.00707	4	2
A3KN83	445	SBNO1	A3KN83_445	SBNO1_HUMAN Protein strawberry notch homolog 1 OS=Homo sapiens OX=9606 GN=SBNO1 PE=1 SV=1	|NLC(BTD[C])PVGSSKPTK	|1	|0.3	|NA	0.3	NA	1	1
O14646	454	CHD1	O14646_454	CHD1_HUMAN Chromodomain-helicase-DNA-binding protein 1 OS=Homo sapiens OX=9606 GN=CHD1 PE=1 SV=2	TTPFKDC(BTD[C])K|	1|	0.3|	NA|	0.3	NA	1	1
P13639	67	EEF2	P13639_67	EF2_HUMAN Elongation factor 2 OS=Homo sapiens OX=9606 GN=EEF2 PE=1 SV=4	KDEQERC(BTD[C])ITIK|KDEQERC(BTD[C])ITIK	1|1	0.31|0.29	NA|NA	0.3	0.01414	2	2
P49790	404	NUP153	P49790_404	NU153_HUMAN Nuclear pore complex protein Nup153 OS=Homo sapiens OX=9606 GN=NUP153 PE=1 SV=2	|IDNKC(BTD[C])STGYEK	|1	|0.3	|NA	0.3	NA	1	1
P61011	118	SRP54	P61011_118	SRP54_HUMAN Signal recognition particle 54 kDa protein OS=Homo sapiens OX=9606 GN=SRP54 PE=1 SV=1	|TTTC(BTD[C])SK	|1	|0.3	|NA	0.3	NA	1	1
P62753	12	RPS6	P62753_12	RS6_HUMAN 40S ribosomal protein S6 OS=Homo sapiens OX=9606 GN=RPS6 PE=1 SV=1	LNISFPATGC(BTD[C])QK|	1|	0.3|	NA|	0.3	NA	1	1
Q00341	566	HDLBP	Q00341_566	VIGLN_HUMAN Vigilin OS=Homo sapiens OX=9606 GN=HDLBP PE=1 SV=2	|NEVEKC(BTD[C])TK	|2	|0.3	|0.0	0.3	NA	2	1
Q13907	39	IDI1	Q13907_39	IDI1_HUMAN Isopentenyl-diphosphate Delta-isomerase 1 OS=Homo sapiens OX=9606 GN=IDI1 PE=1 SV=2	KNC(BTD[C])HLNENIEK|	1|	0.3|	NA|	0.3	NA	1	1
Q3V6T2	1729	CCDC88A	Q3V6T2_1729	GRDN_HUMAN Girdin OS=Homo sapiens OX=9606 GN=CCDC88A PE=1 SV=2	DKPVSC(BTD[C])GLAR|	1|	0.3|	NA|	0.3	NA	1	1
Q7Z6Z7	471	HUWE1	Q7Z6Z7_471	HUWE1_HUMAN E3 ubiquitin-protein ligase HUWE1 OS=Homo sapiens OX=9606 GN=HUWE1 PE=1 SV=3	KEC(BTD[C])PFVIKPK|	1|	0.3|	NA|	0.3	NA	1	1
Q9H6R4	486	NOL6	Q9H6R4_486	NOL6_HUMAN Nucleolar protein 6 OS=Homo sapiens OX=9606 GN=NOL6 PE=1 SV=2	|LQAAC(BTD[C])HR	|1	|0.3	|NA	0.3	NA	1	1
Q9UN37	359	VPS4A	Q9UN37_359	VPS4A_HUMAN Vacuolar protein sorting-associated protein 4A OS=Homo sapiens OX=9606 GN=VPS4A PE=1 SV=1	KVC(BTD[C])GPSR|	1|	0.3|	NA|	0.3	NA	1	1
Q9Y546	350	LRRC42	Q9Y546_350	LRC42_HUMAN Leucine-rich repeat-containing protein 42 OS=Homo sapiens OX=9606 GN=LRRC42 PE=1 SV=1	|AEAPLKC(BTD[C])PLADTHMNSSEK	|1	|0.3	|NA	0.3	NA	1	1
Q15637	171	SF1	Q15637_171	SF01_HUMAN Splicing factor 1 OS=Homo sapiens OX=9606 GN=SF1 PE=1 SV=4	NIEKEC(BTD[C])NAK|NIEKEC(BTD[C])NAK	1|2	0.33|0.265	NA|0.00707	0.2975	0.04596	3	2
Q5T4S7	546	UBR4	Q5T4S7_546	UBR4_HUMAN E3 ubiquitin-protein ligase UBR4 OS=Homo sapiens OX=9606 GN=UBR4 PE=1 SV=1	KAC(BTD[C])VLQR|KAC(BTD[C])VLQR	1|1	0.3|0.29	NA|NA	0.295	0.00707	2	2
Q99497	46	PARK7	Q99497_46	PARK7_HUMAN Protein/nucleic acid deglycase DJ-1 OS=Homo sapiens OX=9606 GN=PARK7 PE=1 SV=2	DPVQC(BTD[C])SR VTVAGLAGKDPVQC(BTD[C])SR|DPVQC(BTD[C])SR VTVAGLAGKDPVQC(BTD[C])SR	2|5	0.35|0.24	0.16971|0.09311	0.295	0.07778	7	2
O00410	1057	IPO5	O00410_1057	IPO5_HUMAN Importin-5 OS=Homo sapiens OX=9606 GN=IPO5 PE=1 SV=4	HEDPC(BTD[C])AKR HEDPC(BTD[C])AK|HEDPC(BTD[C])AKR HEDPC(BTD[C])AK	2|2	0.285|0.295	0.06364|0.07778	0.29	0.00707	4	2
O15355	164	PPM1G	O15355_164	PPM1G_HUMAN Protein phosphatase 1G OS=Homo sapiens OX=9606 GN=PPM1G PE=1 SV=1	YGQNC(BTD[C])HK|	1|	0.29|	NA|	0.29	NA	1	1
P24390	29	KDELR1	P24390_29	ERD21_HUMAN ER lumen protein-retaining receptor 1 OS=Homo sapiens OX=9606 GN=KDELR1 PE=1 SV=1	SC(BTD[C])AGISGK|SC(BTD[C])AGISGK	2|2	0.285|0.295	0.00707|0.00707	0.29	0.00707	4	2
P46782	66	RPS5	P46782_66	RS5_HUMAN 40S ribosomal protein S5 OS=Homo sapiens OX=9606 GN=RPS5 PE=1 SV=4	KAQC(BTD[C])PIVER AQC(BTD[C])PIVER|KAQC(BTD[C])PIVER AQC(BTD[C])PIVER	11|10	0.3|0.28	0.09704|0.0085	0.29	0.01414	21	2
P49411	290	TUFM	P49411_290	EFTU_HUMAN Elongation factor Tu, mitochondrial OS=Homo sapiens OX=9606 GN=TUFM PE=1 SV=2	KGDEC(BTD[C])ELLGHSK GDEC(BTD[C])ELLGHSK|GDEC(BTD[C])ELLGHSK	3|1	0.23|0.35	0.39837|NA	0.29	0.08485	4	2
P51570	243	GALK1	P51570_243	GALK1_HUMAN Galactokinase OS=Homo sapiens OX=9606 GN=GALK1 PE=1 SV=1	RQC(BTD[C])EEVAR|RQC(BTD[C])EEVAR	3|3	0.23|0.35	0.03464|0.1833	0.29	0.08485	6	2
P61421	326	ATP6V0D1	P61421_326	VA0D1_HUMAN V-type proton ATPase subunit d 1 OS=Homo sapiens OX=9606 GN=ATP6V0D1 PE=1 SV=1	|LKEQEC(BTD[C])R	|1	|0.29	|NA	0.29	NA	1	1
P62701	65	RPS4X	P62701_65	RS4X_HUMAN 40S ribosomal protein S4, X isoform OS=Homo sapiens OX=9606 GN=RPS4X PE=1 SV=2	|KIC(BTD[C])MQR	|5	|0.29	|0.0805	0.29	NA	5	1
P83111	154	LACTB	P83111_154	LACTB_HUMAN Serine beta-lactamase-like protein LACTB, mitochondrial OS=Homo sapiens OX=9606 GN=LACTB PE=1 SV=2	VPC(BTD[C])KPETVMR|	1|	0.29|	NA|	0.29	NA	1	1
Q14318	274	FKBP8	Q14318_274	FKBP8_HUMAN Peptidyl-prolyl cis-trans isomerase FKBP8 OS=Homo sapiens OX=9606 GN=FKBP8 PE=1 SV=2	VKC(BTD[C])LNNLAASQLK|	1|	0.29|	NA|	0.29	NA	1	1
Q9HD42	44	CHMP1A	Q9HD42_44	CHM1A_HUMAN Charged multivesicular body protein 1a OS=Homo sapiens OX=9606 GN=CHMP1A PE=1 SV=1	|NVEC(BTD[C])AR	|1	|0.29	|NA	0.29	NA	1	1
Q9UKJ5	74	CHIC2	Q9UKJ5_74	CHIC2_HUMAN Cysteine-rich hydrophobic domain-containing protein 2 OS=Homo sapiens OX=9606 GN=CHIC2 PE=1 SV=1	VNSC(BTD[C])LKK|	1|	0.29|	NA|	0.29	NA	1	1
Q9UQ35	1016	SRRM2	Q9UQ35_1016	SRRM2_HUMAN Serine/arginine repetitive matrix protein 2 OS=Homo sapiens OX=9606 GN=SRRM2 PE=1 SV=2	SPC(BTD[C])PQEK|	1|	0.29|	NA|	0.29	NA	1	1
O43143	190	DHX15	O43143_190	DHX15_HUMAN Pre-mRNA-splicing factor ATP-dependent RNA helicase DHX15 OS=Homo sapiens OX=9606 GN=DHX15 PE=1 SV=2	RGVAC(BTD[C])TQPR GVAC(BTD[C])TQPR|RGVAC(BTD[C])TQPR	2|1	0.255|0.32	0.10607|NA	0.2875	0.04596	3	2
O14980	99	XPO1	O14980_99	XPO1_HUMAN Exportin-1 OS=Homo sapiens OX=9606 GN=XPO1 PE=1 SV=1	NQC(BTD[C])EGIKK|NQC(BTD[C])EGIKK	4|1	0.27|0.3	0.0|NA	0.285	0.02121	5	2
P48637	294	GSS	P48637_294	GSHB_HUMAN Glutathione synthetase OS=Homo sapiens OX=9606 GN=GSS PE=1 SV=1	SHAAKC(BTD[C])PDIATQLAGTK|	2|	0.285|	0.02121|	0.285	NA	2	1
Q5VW32	323	BROX	Q5VW32_323	BROX_HUMAN BRO1 domain-containing protein BROX OS=Homo sapiens OX=9606 GN=BROX PE=1 SV=1	NTLEKC(BTD[C])QR|NTLEKC(BTD[C])QR	2|2	0.29|0.28	0.0|0.0	0.285	0.00707	4	2
Q8NI27	931	THOC2	Q8NI27_931	THOC2_HUMAN THO complex subunit 2 OS=Homo sapiens OX=9606 GN=THOC2 PE=1 SV=2	ERC(BTD[C])TALQDK|ERC(BTD[C])TALQDK	1|2	0.23|0.34	NA|0.18385	0.285	0.07778	3	2
Q9H8V3	584	ECT2	Q9H8V3_584	ECT2_HUMAN Protein ECT2 OS=Homo sapiens OX=9606 GN=ECT2 PE=1 SV=4	INQAKPEC(BTD[C])GR|INQAKPEC(BTD[C])GR	1|1	0.31|0.26	NA|NA	0.285	0.03536	2	2
O00273	165	DFFA	O00273_165	DFFA_HUMAN DNA fragmentation factor subunit alpha OS=Homo sapiens OX=9606 GN=DFFA PE=1 SV=1	|QSC(BTD[C])ATVQR	|1	|0.28	|NA	0.28	NA	1	1
O15231	615	ZNF185	O15231_615	ZN185_HUMAN Zinc finger protein 185 OS=Homo sapiens OX=9606 GN=ZNF185 PE=1 SV=3	|KPPC(BTD[C])GSTPYSER	|1	|0.28	|NA	0.28	NA	1	1
O60264	165	SMARCA5	O60264_165	SMCA5_HUMAN SWI/SNF-related matrix-associated actin-dependent regulator of chromatin subfamily A member 5 OS=Homo sapiens OX=9606 GN=SMARCA5 PE=1 SV=1	ATNVC(BTD[C])TR|ATNVC(BTD[C])TR	1|1	0.31|0.25	NA|NA	0.28	0.04243	2	2
P27816	67	MAP4	P27816_67	MAP4_HUMAN Microtubule-associated protein 4 OS=Homo sapiens OX=9606 GN=MAP4 PE=1 SV=3	|KKPC(BTD[C])SETSQIEDTPSSK	|1	|0.28	|NA	0.28	NA	1	1
P35610	528	SOAT1	P35610_528	SOAT1_HUMAN Sterol O-acyltransferase 1 OS=Homo sapiens OX=9606 GN=SOAT1 PE=1 SV=3	QHC(BTD[C])PLK|QHC(BTD[C])PLK	1|1	0.28|0.28	NA|NA	0.28	0	2	2
P49792	188	RANBP2	P49792_188	RBP2_HUMAN E3 SUMO-protein ligase RanBP2 OS=Homo sapiens OX=9606 GN=RANBP2 PE=1 SV=2	|DAVAHC(BTD[C])HEAER	|3	|0.28	|0.0866	0.28	NA	3	1
P60866	70	RPS20	P60866_70	RS20_HUMAN 40S ribosomal protein S20 OS=Homo sapiens OX=9606 GN=RPS20 PE=1 SV=1	KTPC(BTD[C])GEGSK TPC(BTD[C])GEGSK|KTPC(BTD[C])GEGSK TPC(BTD[C])GEGSK	8|8	0.275|0.285	0.23253|0.28428	0.28	0.00707	16	2
P63279	75	UBE2I	P63279_75	UBC9_HUMAN SUMO-conjugating enzyme UBC9 OS=Homo sapiens OX=9606 GN=UBE2I PE=1 SV=1	|DDYPSSPPKC(BTD[C])K	|1	|0.28	|NA	0.28	NA	1	1
Q6IBS0	141	TWF2	Q6IBS0_141	TWF2_HUMAN Twinfilin-2 OS=Homo sapiens OX=9606 GN=TWF2 PE=1 SV=2	|HLSSC(BTD[C])AAPAPLTSAER	|1	|0.28	|NA	0.28	NA	1	1
P38646	366	HSPA9	P38646_366	GRP75_HUMAN Stress-70 protein, mitochondrial OS=Homo sapiens OX=9606 GN=HSPA9 PE=1 SV=2	TIAPC(BTD[C])QK|RTIAPC(BTD[C])QK TIAPC(BTD[C])QK	1|7	0.27|0.28	NA|0.11796	0.275	0.00707	8	2
Q06830	173	PRDX1	Q06830_173	PRDX1_HUMAN Peroxiredoxin-1 OS=Homo sapiens OX=9606 GN=PRDX1 PE=1 SV=1	HGEVC(BTD[C])PAGWKPGSDTIKPDVQK|HGEVC(BTD[C])PAGWKPGSDTIKPDVQK	1|1	0.22|0.33	NA|NA	0.275	0.07778	2	2
Q14204	4570	DYNC1H1	Q14204_4570	DYHC1_HUMAN Cytoplasmic dynein 1 heavy chain 1 OS=Homo sapiens OX=9606 GN=DYNC1H1 PE=1 SV=5	LQGATC(BTD[C])NNNK|LQGATC(BTD[C])NNNK	2|1	0.3|0.25	0.0|NA	0.275	0.03536	3	2
Q86YN1	86	DOLPP1	Q86YN1_86	DOPP1_HUMAN Dolichyldiphosphatase 1 OS=Homo sapiens OX=9606 GN=DOLPP1 PE=2 SV=1	PC(BTD[C])GGPHTAVGTK|NVIQEPRPC(BTD[C])GGPHTAVGTK	1|1	0.31|0.24	NA|NA	0.275	0.0495	2	2
Q9BTE3	239	MCMBP	Q9BTE3_239	MCMBP_HUMAN Mini-chromosome maintenance complex-binding protein OS=Homo sapiens OX=9606 GN=MCMBP PE=1 SV=2	GPAC(BTD[C])LVK|	2|	0.275|	0.00707|	0.275	NA	2	1
P29558	102	RBMS1	P29558_102	RBMS1_HUMAN RNA-binding motif, single-stranded-interacting protein 1 OS=Homo sapiens OX=9606 GN=RBMS1 PE=1 SV=3	TTNKC(BTD[C])K|TTNKC(BTD[C])K	2|2	0.275|0.27	0.02121|0.01414	0.2725	0.00354	4	2
P31948	278	STIP1	P31948_278	STIP1_HUMAN Stress-induced-phosphoprotein 1 OS=Homo sapiens OX=9606 GN=STIP1 PE=1 SV=1	GDYNKC(BTD[C])R|	1|	0.27|	NA|	0.27	NA	1	1
P33992	570	MCM5	P33992_570	MCM5_HUMAN DNA replication licensing factor MCM5 OS=Homo sapiens OX=9606 GN=MCM5 PE=1 SV=5	VKC(BTD[C])GPR|VKC(BTD[C])GPR	1|1	0.27|0.27	NA|NA	0.27	0	2	2
P51116	151	FXR2	P51116_151	FXR2_HUMAN Fragile X mental retardation syndrome-related protein 2 OS=Homo sapiens OX=9606 GN=FXR2 PE=1 SV=2	EAC(BTD[C])SNENVHK|	2|	0.27|	0.04243|	0.27	NA	2	1
Q16543	64	CDC37	Q16543_64	CDC37_HUMAN Hsp90 co-chaperone Cdc37 OS=Homo sapiens OX=9606 GN=CDC37 PE=1 SV=1	VAEC(BTD[C])QRK KVAEC(BTD[C])QR VAEC(BTD[C])QR|VAEC(BTD[C])QR	4|1	0.26|0.28	0.08057|NA	0.27	0.01414	5	2
Q5VTL8	113	PRPF38B	Q5VTL8_113	PR38B_HUMAN Pre-mRNA-splicing factor 38B OS=Homo sapiens OX=9606 GN=PRPF38B PE=1 SV=1	TAGQTGMC(BTD[C])GGVR|TAGQTGMC(BTD[C])GGVR	1|1	0.27|0.27	NA|NA	0.27	0	2	2
Q8NCG7	519	DAGLB	Q8NCG7_519	DGLB_HUMAN Sn1-specific diacylglycerol lipase beta OS=Homo sapiens OX=9606 GN=DAGLB PE=1 SV=2	VVAHC(BTD[C])NKPK|VVAHC(BTD[C])NKPK	1|1	0.29|0.25	NA|NA	0.27	0.02828	2	2
Q8TBC4	139	UBA3	Q8TBC4_139	UBA3_HUMAN NEDD8-activating enzyme E1 catalytic subunit OS=Homo sapiens OX=9606 GN=UBA3 PE=1 SV=2	VPNC(BTD[C])NVVPHFNK|	3|	0.27|	0.0|	0.27	NA	3	1
Q99436	74	PSMB7	Q99436_74	PSB7_HUMAN Proteasome subunit beta type-7 OS=Homo sapiens OX=9606 GN=PSMB7 PE=1 SV=1	ATEGMVVADKNC(BTD[C])SK|ATEGMVVADKNC(BTD[C])SK	2|3	0.31|0.23	0.01414|0.04359	0.27	0.05657	5	2
Q96CV9	334	OPTN	Q96CV9_334	OPTN_HUMAN Optineurin OS=Homo sapiens OX=9606 GN=OPTN PE=1 SV=3	LQEKC(BTD[C])QALER|LQEKC(BTD[C])QALER	3|1	0.27|0.26	0.0|NA	0.265	0.00707	4	2
Q16836	211	HADH	Q16836_211	HCDH_HUMAN Hydroxyacyl-coenzyme A dehydrogenase, mitochondrial OS=Homo sapiens OX=9606 GN=HADH PE=1 SV=3	HPVSC(BTD[C])K|HPVSC(BTD[C])K	3|6	0.3|0.225	0.03464|0.01643	0.2625	0.05303	9	2
O76076	117	WISP2	O76076_117	WISP2_HUMAN WNT1-inducible-signaling pathway protein 2 OS=Homo sapiens OX=9606 GN=WISP2 PE=1 SV=1	PHC(BTD[C])SLR|	1|	0.26|	NA|	0.26	NA	1	1
P17844	89	DDX5	P17844_89	DDX5_HUMAN Probable ATP-dependent RNA helicase DDX5 OS=Homo sapiens OX=9606 GN=DDX5 PE=1 SV=1	GHNC(BTD[C])PK|GHNC(BTD[C])PK	1|2	0.26|0.26	NA|0.0	0.26	0	3	2
P21980	269	TGM2	P21980_269	TGM2_HUMAN Protein-glutamine gamma-glutamyltransferase 2 OS=Homo sapiens OX=9606 GN=TGM2 PE=1 SV=2	NHGC(BTD[C])QR|NHGC(BTD[C])QR	3|4	0.26|0.26	0.01|0.005	0.26	0	7	2
P30085	20	CMPK1	P30085_20	KCY_HUMAN UMP-CMP kinase OS=Homo sapiens OX=9606 GN=CMPK1 PE=1 SV=3	|GTQC(BTD[C])AR	|1	|0.26	|NA	0.26	NA	1	1
P46100	450	ATRX	P46100_450	ATRX_HUMAN Transcriptional regulator ATRX OS=Homo sapiens OX=9606 GN=ATRX PE=1 SV=5	|KGEKPC(BTD[C])ALEK	|1	|0.26	|NA	0.26	NA	1	1
P61586	16	RHOA	P61586_16	RHOA_HUMAN Transforming protein RhoA OS=Homo sapiens OX=9606 GN=RHOA PE=1 SV=1	|LVIVGDGAC(BTD[C])GK	|3	|0.26	|0.01155	0.26	NA	3	1
Q12926	316	ELAVL2	Q12926_316	ELAV2_HUMAN ELAV-like protein 2 OS=Homo sapiens OX=9606 GN=ELAVL2 PE=1 SV=2	|DFNTNKC(BTD[C])K	|1	|0.26	|NA	0.26	NA	1	1
Q6NYC8	276	PPP1R18	Q6NYC8_276	PPR18_HUMAN Phostensin OS=Homo sapiens OX=9606 GN=PPP1R18 PE=1 SV=1	QDYSEEC(BTD[C])GRK|	1|	0.26|	NA|	0.26	NA	1	1
Q709C8	2440	VPS13C	Q709C8_2440	VP13C_HUMAN Vacuolar protein sorting-associated protein 13C OS=Homo sapiens OX=9606 GN=VPS13C PE=1 SV=1	|VKPNC(BTD[C])NLR	|1	|0.26	|NA	0.26	NA	1	1
Q92878	221	RAD50	Q92878_221	RAD50_HUMAN DNA repair protein RAD50 OS=Homo sapiens OX=9606 GN=RAD50 PE=1 SV=1	|EKAC(BTD[C])EIR	|1	|0.26	|NA	0.26	NA	1	1
Q96EY4	162	TMA16	Q96EY4_162	TMA16_HUMAN Translation machinery-associated protein 16 OS=Homo sapiens OX=9606 GN=TMA16 PE=1 SV=2	|KIC(BTD[C])ANDAIPK	|2	|0.26	|0.02828	0.26	NA	2	1
Q9BRX2	175	PELO	Q9BRX2_175	PELO_HUMAN Protein pelota homolog OS=Homo sapiens OX=9606 GN=PELO PE=1 SV=2	GNC(BTD[C])SQHDR|	1|	0.26|	NA|	0.26	NA	1	1
Q9BXB4	591	OSBPL11	Q9BXB4_591	OSB11_HUMAN Oxysterol-binding protein-related protein 11 OS=Homo sapiens OX=9606 GN=OSBPL11 PE=1 SV=2	|VSVNC(BTD[C])AK	|1	|0.26	|NA	0.26	NA	1	1
Q9NRA2	83	SLC17A5	Q9NRA2_83	S17A5_HUMAN Sialin OS=Homo sapiens OX=9606 GN=SLC17A5 PE=1 SV=2	AC(BTD[C])PEHSAPIK|	1|	0.26|	NA|	0.26	NA	1	1
Q8ND04	248	SMG8	Q8ND04_248	SMG8_HUMAN Protein SMG8 OS=Homo sapiens OX=9606 GN=SMG8 PE=1 SV=1	TAIKDC(BTD[C])PVGK|TAIKDC(BTD[C])PVGK	2|4	0.25|0.265	0.0|0.00577	0.2575	0.01061	6	2
P30419	294	NMT1	P30419_294	NMT1_HUMAN Glycylpeptide N-tetradecanoyltransferase 1 OS=Homo sapiens OX=9606 GN=NMT1 PE=1 SV=2	PVGTC(BTD[C])R|PVGTC(BTD[C])R	1|1	0.23|0.28	NA|NA	0.255	0.03536	2	2
Q00839	562	HNRNPU	Q00839_562	HNRPU_HUMAN Heterogeneous nuclear ribonucleoprotein U OS=Homo sapiens OX=9606 GN=HNRNPU PE=1 SV=6	APQC(BTD[C])LGK|APQC(BTD[C])LGK	5|5	0.24|0.27	0.02881|0.06611	0.255	0.02121	10	2
Q16186	88	ADRM1	Q16186_88	ADRM1_HUMAN Proteasomal ubiquitin receptor ADRM1 OS=Homo sapiens OX=9606 GN=ADRM1 PE=1 SV=2	VPQC(BTD[C])PSGR|VPQC(BTD[C])PSGR	4|4	0.26|0.245	0.05774|0.02449	0.2525	0.01061	8	2
O96000	107	NDUFB10	O96000_107	NDUBA_HUMAN NADH dehydrogenase [ubiquinone] 1 beta subcomplex subunit 10 OS=Homo sapiens OX=9606 GN=NDUFB10 PE=1 SV=3	|LKAC(BTD[C])QQR	|1	|0.25	|NA	0.25	NA	1	1
P49915	631	GMPS	P49915_631	GUAA_HUMAN GMP synthase [glutamine-hydrolyzing] OS=Homo sapiens OX=9606 GN=GMPS PE=1 SV=1	|QPSC(BTD[C])QR	|1	|0.25	|NA	0.25	NA	1	1
Q15717	284	ELAVL1	Q15717_284	ELAV1_HUMAN ELAV-like protein 1 OS=Homo sapiens OX=9606 GN=ELAVL1 PE=1 SV=2	DFNTNKC(BTD[C])K|	1|	0.25|	NA|	0.25	NA	1	1
Q6PL18	484	ATAD2	Q6PL18_484	ATAD2_HUMAN ATPase family AAA domain-containing protein 2 OS=Homo sapiens OX=9606 GN=ATAD2 PE=1 SV=1	|ALANEC(BTD[C])SQGDKR	|1	|0.25	|NA	0.25	NA	1	1
Q86VP6	1153	CAND1	Q86VP6_1153	CAND1_HUMAN Cullin-associated NEDD8-dissociated protein 1 OS=Homo sapiens OX=9606 GN=CAND1 PE=1 SV=2	ATC(BTD[C])TTK|ATC(BTD[C])TTK	1|1	0.24|0.26	NA|NA	0.25	0.01414	2	2
Q86WX3	104	RPS19BP1	Q86WX3_104	AROS_HUMAN Active regulator of SIRT1 OS=Homo sapiens OX=9606 GN=RPS19BP1 PE=1 SV=1	AC(BTD[C])DRPVAK|	1|	0.25|	NA|	0.25	NA	1	1
Q96DG6	121	CMBL	Q96DG6_121	CMBL_HUMAN Carboxymethylenebutenolidase homolog OS=Homo sapiens OX=9606 GN=CMBL PE=1 SV=1	|QQC(BTD[C])HAQK	|1	|0.25	|NA	0.25	NA	1	1
Q9BX95	76	SGPP1	Q9BX95_76	SGPP1_HUMAN Sphingosine-1-phosphate phosphatase 1 OS=Homo sapiens OX=9606 GN=SGPP1 PE=1 SV=2	NQC(BTD[C])PAKPDGGGAPNGVR|NQC(BTD[C])PAKPDGGGAPNGVR	2|1	0.27|0.23	0.0|NA	0.25	0.02828	3	2
P13726	241	F3	P13726_241	TF_HUMAN Tissue factor OS=Homo sapiens OX=9606 GN=F3 PE=1 SV=1	|STDSPVEC(BTD[C])MGQEK	|2	|0.245	|0.02121	0.245	NA	2	1
P14625	138	HSP90B1	P14625_138	ENPL_HUMAN Endoplasmin OS=Homo sapiens OX=9606 GN=HSP90B1 PE=1 SV=1	IKC(BTD[C])DKEK|	2|	0.245|	0.00707|	0.245	NA	2	1
P27816	654	MAP4	P27816_654	MAP4_HUMAN Microtubule-associated protein 4 OS=Homo sapiens OX=9606 GN=MAP4 PE=1 SV=3	KPC(BTD[C])NSQPSELSSETSGIARPEEGRPVVSGTGNDITTPPNK KPC(BTD[C])NSQPSELSSETSGIAR|KPC(BTD[C])NSQPSELSSETSGIAR	2|1	0.24|0.25	0.02828|NA	0.245	0.00707	3	2
P00533	31	EGFR	P00533_31	EGFR_HUMAN Epidermal growth factor receptor OS=Homo sapiens OX=9606 GN=EGFR PE=1 SV=2	KVC(BTD[C])QGTSNK|	1|	0.24|	NA|	0.24	NA	1	1
P20700	110	LMNB1	P20700_110	LMNB1_HUMAN Lamin-B1 OS=Homo sapiens OX=9606 GN=LMNB1 PE=1 SV=2	|LQIELGKC(BTD[C])K	|1	|0.24	|NA	0.24	NA	1	1
Q16666	679	IFI16	Q16666_679	IF16_HUMAN Gamma-interferon-inducible protein 16 OS=Homo sapiens OX=9606 GN=IFI16 PE=1 SV=3	INQLC(BTD[C])SQTK|	1|	0.24|	NA|	0.24	NA	1	1
Q6P2Q9	435	PRPF8	Q6P2Q9_435	PRP8_HUMAN Pre-mRNA-processing-splicing factor 8 OS=Homo sapiens OX=9606 GN=PRPF8 PE=1 SV=2	EHC(BTD[C])PAGQPVK|EHC(BTD[C])PAGQPVK	2|3	0.23|0.25	0.0|0.00577	0.24	0.01414	5	2
Q8IXI1	185	RHOT2	Q8IXI1_185	MIRO2_HUMAN Mitochondrial Rho GTPase 2 OS=Homo sapiens OX=9606 GN=RHOT2 PE=1 SV=2	QLRPAC(BTD[C])AQALTR|	1|	0.24|	NA|	0.24	NA	1	1
P23528	147	CFL1	P23528_147	COF1_HUMAN Cofilin-1 OS=Homo sapiens OX=9606 GN=CFL1 PE=1 SV=3	DRC(BTD[C])TLAEK HELQANCYEEVKDRC(BTD[C])TLAEK C(BTD[C])TLAEK|DRC(BTD[C])TLAEK C(BTD[C])TLAEK	12|13	0.235|0.24	0.26401|0.18648	0.2375	0.00354	25	2
Q7Z3U7	212	MON2	Q7Z3U7_212	MON2_HUMAN Protein MON2 homolog OS=Homo sapiens OX=9606 GN=MON2 PE=1 SV=3	SVSTLKPC(BTD[C])AK|SVSTLKPC(BTD[C])AK	1|2	0.21|0.255	NA|0.03536	0.2325	0.03182	3	2
O94906	901	PRPF6	O94906_901	PRP6_HUMAN Pre-mRNA-processing factor 6 OS=Homo sapiens OX=9606 GN=PRPF6 PE=1 SV=1	KRC(BTD[C])ESAEPR|	1|	0.23|	NA|	0.23	NA	1	1
P51114	211	FXR1	P51114_211	FXR1_HUMAN Fragile X mental retardation syndrome-related protein 1 OS=Homo sapiens OX=9606 GN=FXR1 PE=1 SV=3	HLEC(BTD[C])TK|	1|	0.23|	NA|	0.23	NA	1	1
P61221	475	ABCE1	P61221_475	ABCE1_HUMAN ATP-binding cassette sub-family E member 1 OS=Homo sapiens OX=9606 GN=ABCE1 PE=1 SV=1	|VALALC(BTD[C])LGK	|1	|0.23	|NA	0.23	NA	1	1
P63151	398	PPP2R2A	P63151_398	2ABA_HUMAN Serine/threonine-protein phosphatase 2A 55 kDa regulatory subunit B alpha isoform OS=Homo sapiens OX=9606 GN=PPP2R2A PE=1 SV=1	KVC(BTD[C])ASGK|	1|	0.23|	NA|	0.23	NA	1	1
Q15121	27	PEA15	Q15121_27	PEA15_HUMAN Astrocytic phosphoprotein PEA-15 OS=Homo sapiens OX=9606 GN=PEA15 PE=1 SV=2	SAC(BTD[C])KEDIPSEK|	1|	0.23|	NA|	0.23	NA	1	1
Q15149	1156	PLEC	Q15149_1156	PLEC_HUMAN Plectin OS=Homo sapiens OX=9606 GN=PLEC PE=1 SV=3	LPLDKEPAREC(BTD[C])AQR|	1|	0.23|	NA|	0.23	NA	1	1
Q15397	150	PUM3	Q15397_150	PUM3_HUMAN Pumilio homolog 3 OS=Homo sapiens OX=9606 GN=PUM3 PE=1 SV=3	RKDC(BTD[C])DK|	1|	0.23|	NA|	0.23	NA	1	1
Q9UG63	523	ABCF2	Q9UG63_523	ABCF2_HUMAN ATP-binding cassette sub-family F member 2 OS=Homo sapiens OX=9606 GN=ABCF2 PE=1 SV=2	NLSDGQKC(BTD[C])R|	2|	0.23|	0.0|	0.23	NA	2	1
Q8NFW8	432	CMAS	Q8NFW8_432	NEUA_HUMAN N-acylneuraminate cytidylyltransferase OS=Homo sapiens OX=9606 GN=CMAS PE=1 SV=2	VNNSC(BTD[C])QK|VNNSC(BTD[C])QK	1|1	0.17|0.28	NA|NA	0.225	0.07778	2	2
Q9Y3F4	10	STRAP	Q9Y3F4_10	STRAP_HUMAN Serine-threonine kinase receptor-associated protein OS=Homo sapiens OX=9606 GN=STRAP PE=1 SV=1	QTPLTC(BTD[C])SGHTR|QTPLTC(BTD[C])SGHTR	1|1	0.25|0.2	NA|NA	0.225	0.03536	2	2
O15145	85	ARPC3	O15145_85	ARPC3_HUMAN Actin-related protein 2/3 complex subunit 3 OS=Homo sapiens OX=9606 GN=ARPC3 PE=1 SV=3	|LQKC(BTD[C])NSK	|1	|0.22	|NA	0.22	NA	1	1
P08133	552	ANXA6	P08133_552	ANXA6_HUMAN Annexin A6 OS=Homo sapiens OX=9606 GN=ANXA6 PE=1 SV=3	|FMTILC(BTD[C])TR	|2	|0.22	|0.0	0.22	NA	2	1
P62857	27	RPS28	P62857_27	RS28_HUMAN 40S ribosomal protein S28 OS=Homo sapiens OX=9606 GN=RPS28 PE=1 SV=1	TGSQGQC(BTD[C])TQVR|	1|	0.22|	NA|	0.22	NA	1	1
Q6P996	361	PDXDC1	Q6P996_361	PDXD1_HUMAN Pyridoxal-dependent decarboxylase domain-containing protein 1 OS=Homo sapiens OX=9606 GN=PDXDC1 PE=1 SV=2	HAC(BTD[C])QLSQR|	1|	0.22|	NA|	0.22	NA	1	1
Q8N1F7	522	NUP93	Q8N1F7_522	NUP93_HUMAN Nuclear pore complex protein Nup93 OS=Homo sapiens OX=9606 GN=NUP93 PE=1 SV=2	SSGQSAQLLSHEPGDPPC(BTD[C])LR|	1|	0.22|	NA|	0.22	NA	1	1
P10644	347	PRKAR1A	P10644_347	KAP0_HUMAN cAMP-dependent protein kinase type I-alpha regulatory subunit OS=Homo sapiens OX=9606 GN=PRKAR1A PE=1 SV=1	GPLKC(BTD[C])VK|	2|	0.215|	0.13435|	0.215	NA	2	1
P23921	411	RRM1	P23921_411	RIR1_HUMAN Ribonucleoside-diphosphate reductase large subunit OS=Homo sapiens OX=9606 GN=RRM1 PE=1 SV=1	|DSC(BTD[C])NRK	|1	|0.21	|NA	0.21	NA	1	1
P48509	208	CD151	P48509_208	CD151_HUMAN CD151 antigen OS=Homo sapiens OX=9606 GN=CD151 PE=1 SV=3	|VEGGC(BTD[C])ITK	|1	|0.21	|NA	0.21	NA	1	1
P53814	296	SMTN	P53814_296	SMTN_HUMAN Smoothelin OS=Homo sapiens OX=9606 GN=SMTN PE=1 SV=7	ADVAGPRPC(BTD[C])QR|	1|	0.21|	NA|	0.21	NA	1	1
P62244	30	RPS15A	P62244_30	RS15A_HUMAN 40S ribosomal protein S15a OS=Homo sapiens OX=9606 GN=RPS15A PE=1 SV=2	QVLIRPC(BTD[C])SK|QVLIRPC(BTD[C])SK	7|4	0.21|0.21	0.01134|0.06683	0.21	0	11	2
Q13823	336	GNL2	Q13823_336	NOG2_HUMAN Nucleolar GTP-binding protein 2 OS=Homo sapiens OX=9606 GN=GNL2 PE=1 SV=1	|KVC(BTD[C])NVAPIAGETK	|1	|0.21	|NA	0.21	NA	1	1
Q92878	1201	RAD50	Q92878_1201	RAD50_HUMAN DNA repair protein RAD50 OS=Homo sapiens OX=9606 GN=RAD50 PE=1 SV=1	|GRC(BTD[C])SAGQK	|1	|0.21	|NA	0.21	NA	1	1
Q9BY42	262	RTF2	Q9BY42_262	RTF2_HUMAN Replication termination factor 2 OS=Homo sapiens OX=9606 GN=RTF2 PE=1 SV=3	|AGKPPC(BTD[C])GATK	|1	|0.21	|NA	0.21	NA	1	1
Q9Y2G8	744	DNAJC16	Q9Y2G8_744	DJC16_HUMAN DnaJ homolog subfamily C member 16 OS=Homo sapiens OX=9606 GN=DNAJC16 PE=2 SV=3	|GKPSC(BTD[C])GLGSR	|1	|0.21	|NA	0.21	NA	1	1
P60981	135	DSTN	P60981_135	DEST_HUMAN Destrin OS=Homo sapiens OX=9606 GN=DSTN PE=1 SV=3	HEC(BTD[C])QANGPEDLNR|	2|	0.195|	0.00707|	0.195	NA	2	1
Q14919	54	DRAP1	Q14919_54	NC2A_HUMAN Dr1-associated corepressor OS=Homo sapiens OX=9606 GN=DRAP1 PE=1 SV=3	KAC(BTD[C])QVTQSR|	1|	0.19|	NA|	0.19	NA	1	1
Q9P258	102	RCC2	Q9P258_102	RCC2_HUMAN Protein RCC2 OS=Homo sapiens OX=9606 GN=RCC2 PE=1 SV=2	LEGSKC(BTD[C])K|	1|	0.19|	NA|	0.19	NA	1	1
P29590	189	PML	P29590_189	PML_HUMAN Protein PML OS=Homo sapiens OX=9606 GN=PML PE=1 SV=3	TNNIFC(BTD[C])SNPNHR|	1|	0.18|	NA|	0.18	NA	1	1
P41240	223	CSK	P41240_223	CSK_HUMAN Tyrosine-protein kinase CSK OS=Homo sapiens OX=9606 GN=CSK PE=1 SV=1	VAVKC(BTD[C])IK|	1|	0.18|	NA|	0.18	NA	1	1
Q8NHV4	314	NEDD1	Q8NHV4_314	NEDD1_HUMAN Protein NEDD1 OS=Homo sapiens OX=9606 GN=NEDD1 PE=1 SV=1	|GC(BTD[C])SNKPTTVNK	|1	|0.18	|NA	0.18	NA	1	1
P10606	113	COX5B	P10606_113	COX5B_HUMAN Cytochrome c oxidase subunit 5B, mitochondrial OS=Homo sapiens OX=9606 GN=COX5B PE=1 SV=2	|GEAQRC(BTD[C])PR	|1	|0.17	|NA	0.17	NA	1	1
P55786	339	NPEPPS	P55786_339	PSA_HUMAN Puromycin-sensitive aminopeptidase OS=Homo sapiens OX=9606 GN=NPEPPS PE=1 SV=2	|NSC(BTD[C])SSSR	|1	|0.17	|NA	0.17	NA	1	1
Q9Y696	35	CLIC4	Q9Y696_35	CLIC4_HUMAN Chloride intracellular channel protein 4 OS=Homo sapiens OX=9606 GN=CLIC4 PE=1 SV=4	|AGSDGESIGNC(BTD[C])PFSQR	|1	|0.14	|NA	0.14	NA	1	1
Q06330	454	RBPJ	Q06330_454	SUH_HUMAN Recombining binding protein suppressor of hairless OS=Homo sapiens OX=9606 GN=RBPJ PE=1 SV=3	PHC(BTD[C])SAAGAILR|	1|	0.02|	NA|	0.02	NA	1	1

## Sheet: 3b
Uniprot Accession #	Site	Genename	Genename_site	Description	Modified sequences	Spectrum count	All ratio	All SD Ratio	RH/L	Ratio SD	Total spectrum count	Repeat counts
P62495	335	P62495_335	ETF1	ERF1_HUMAN Eukaryotic peptide chain release factor subunit 1 OS=Homo sapiens OX=9606 GN=ETF1 PE=1 SV=3	YVLHC(BTD[C])QGTEEEK|	1|	6.92|	NA|	6.92	NA	1	1
O75367	297	O75367_297	H2AFY	H2AY_HUMAN Core histone macro-H2A.1 OS=Homo sapiens OX=9606 GN=H2AFY PE=1 SV=4	|NC(BTD[C])LALADDKK	|1	|6.75	|NA	6.75	NA	1	1
P07237	343	P07237_343	P4HB	PDIA1_HUMAN Protein disulfide-isomerase OS=Homo sapiens OX=9606 GN=P4HB PE=1 SV=3	ITEFC(BTD[C])HR|ITEFC(BTD[C])HR	4|7	6.31|5.34	0.17671|0.62769	5.825	0.68589	11	2
Q96FX7	217	Q96FX7_217	TRMT61A	TRM61_HUMAN tRNA (adenine(58)-N(1))-methyltransferase catalytic subunit TRMT61A OS=Homo sapiens OX=9606 GN=TRMT61A PE=1 SV=1	TC(BTD[C])QALAAR|	2|	5.66|	0.0|	5.66	NA	2	1
P00558	50	P00558_50	PGK1	PGK1_HUMAN Phosphoglycerate kinase 1 OS=Homo sapiens OX=9606 GN=PGK1 PE=1 SV=3	|FC(BTD[C])LDNGAK	|2	|5.38	|0.0	5.38	NA	2	1
Q8N684	399	Q8N684_399	CPSF7	CPSF7_HUMAN Cleavage and polyadenylation specificity factor subunit 7 OS=Homo sapiens OX=9606 GN=CPSF7 PE=1 SV=1	DC(BTD[C])LHGIEAK|	1|	5.13|	NA|	5.13	NA	1	1
Q14204	867	Q14204_867	DYNC1H1	DYHC1_HUMAN Cytoplasmic dynein 1 heavy chain 1 OS=Homo sapiens OX=9606 GN=DYNC1H1 PE=1 SV=5	SLETC(BTD[C])MYDHK|SLETC(BTD[C])MYDHK	1|1	4.43|5.53	NA|NA	4.98	0.77782	2	2
P50395	302	P50395_302	GDI2	GDIB_HUMAN Rab GDP dissociation inhibitor beta OS=Homo sapiens OX=9606 GN=GDI2 PE=1 SV=2	|VIC(BTD[C])ILSHPIK	|1	|4.77	|NA	4.77	NA	1	1
Q9NUJ1	107	Q9NUJ1_107	ABHD10	ABHDA_HUMAN Mycophenolic acid acyl-glucuronide esterase, mitochondrial OS=Homo sapiens OX=9606 GN=ABHD10 PE=1 SV=1	SLGHAC(BTD[C])IR|	1|	4.73|	NA|	4.73	NA	1	1
Q92598	270	Q92598_270	HSPH1	HS105_HUMAN Heat shock protein 105 kDa OS=Homo sapiens OX=9606 GN=HSPH1 PE=1 SV=1	|LYQEC(BTD[C])EK	|2	|4.59	|1.18794	4.59	NA	2	1
Q8TDH9	117	Q8TDH9_117	BLOC1S5	BL1S5_HUMAN Biogenesis of lysosome-related organelles complex 1 subunit 5 OS=Homo sapiens OX=9606 GN=BLOC1S5 PE=1 SV=1	LQAANDSVC(BTD[C])R|	1|	4.5|	NA|	4.5	NA	1	1
P49368	398	P49368_398	CCT3	TCPG_HUMAN T-complex protein 1 subunit gamma OS=Homo sapiens OX=9606 GN=CCT3 PE=1 SV=4	|NLQDAMQVC(BTD[C])R	|2	|4.47	|2.99813	4.47	NA	2	1
Q92797	686	Q92797_686	SYMPK	SYMPK_HUMAN Symplekin OS=Homo sapiens OX=9606 GN=SYMPK PE=1 SV=2	KYC(BTD[C])EDESR|	1|	4.41|	NA|	4.41	NA	1	1
Q86VP6	954	Q86VP6_954	CAND1	CAND1_HUMAN Cullin-associated NEDD8-dissociated protein 1 OS=Homo sapiens OX=9606 GN=CAND1 PE=1 SV=2	NVVAEC(BTD[C])LGK|	1|	4.37|	NA|	4.37	NA	1	1
P50990	36	P50990_36	CCT8	TCPQ_HUMAN T-complex protein 1 subunit theta OS=Homo sapiens OX=9606 GN=CCT8 PE=1 SV=4	NIQAC(BTD[C])K|NIQAC(BTD[C])K	3|3	3.94|4.75	1.61158|1.52998	4.345	0.57276	6	2
Q9UBD5	483	Q9UBD5_483	ORC3	ORC3_HUMAN Origin recognition complex subunit 3 OS=Homo sapiens OX=9606 GN=ORC3 PE=1 SV=1	SYC(BTD[C])ENHLGSTAK|	1|	4.26|	NA|	4.26	NA	1	1
Q01082	1900	Q01082_1900	SPTBN1	SPTB2_HUMAN Spectrin beta chain, non-erythrocytic 1 OS=Homo sapiens OX=9606 GN=SPTBN1 PE=1 SV=2	SLLDAC(BTD[C])ESRR|SLLDAC(BTD[C])ESR	1|1	3.62|4.8	NA|NA	4.21	0.83439	2	2
P53618	390	P53618_390	COPB1	COPB_HUMAN Coatomer subunit beta OS=Homo sapiens OX=9606 GN=COPB1 PE=1 SV=3	TLHSC(BTD[C])SVR|TLHSC(BTD[C])SVR	6|3	3.78|4.41	0.27645|1.9948	4.095	0.44548	9	2
Q00839	335	Q00839_335	HNRNPU	HNRPU_HUMAN Heterogeneous nuclear ribonucleoprotein U OS=Homo sapiens OX=9606 GN=HNRNPU PE=1 SV=6	GKVC(BTD[C])FEMK|GKVC(BTD[C])FEMK	3|2	4.36|3.8	0.28113|0.70711	4.08	0.39598	5	2
Q13433	303	Q13433_303	SLC39A6	S39A6_HUMAN Zinc transporter ZIP6 OS=Homo sapiens OX=9606 GN=SLC39A6 PE=1 SV=3	|SC(BTD[C])LIHTSEK	|2	|4.045	|0.92631	4.045	NA	2	1
O43747	160	O43747_160	AP1G1	AP1G1_HUMAN AP-1 complex subunit gamma-1 OS=Homo sapiens OX=9606 GN=AP1G1 PE=1 SV=5	AALC(BTD[C])AVHVIR|AALC(BTD[C])AVHVIR	1|2	4.28|3.76	NA|0.0	4.02	0.3677	3	2
O75643	1592	O75643_1592	SNRNP200	U520_HUMAN U5 small nuclear ribonucleoprotein 200 kDa helicase OS=Homo sapiens OX=9606 GN=SNRNP200 PE=1 SV=2	FLHC(BTD[C])TEK|FLHC(BTD[C])TEK	1|2	3.41|4.61	NA|1.54149	4.01	0.84853	3	2
Q9H2P0	223	Q9H2P0_223	ADNP	ADNP_HUMAN Activity-dependent neuroprotector homeobox protein OS=Homo sapiens OX=9606 GN=ADNP PE=1 SV=1	EESSIHC(BTD[C])K|	1|	4.01|	NA|	4.01	NA	1	1
P55072	535	P55072_535	VCP	TERA_HUMAN Transitional endoplasmic reticulum ATPase OS=Homo sapiens OX=9606 GN=VCP PE=1 SV=4	|AIANEC(BTD[C])QANFISIK	|3	|4.0	|1.22398	4	NA	3	1
Q10567	112	Q10567_112	AP1B1	AP1B1_HUMAN AP-1 complex subunit beta-1 OS=Homo sapiens OX=9606 GN=AP1B1 PE=1 SV=2	|TMGC(BTD[C])IR	|7	|3.96	|0.20695	3.96	NA	7	1
P40925	251	P40925_251	MDH1	MDHC_HUMAN Malate dehydrogenase, cytoplasmic OS=Homo sapiens OX=9606 GN=MDH1 PE=1 SV=4	AIC(BTD[C])DHVR|AIC(BTD[C])DHVR	3|5	3.84|4.05	1.30092|1.42855	3.945	0.14849	8	2
Q8WTS6	288	Q8WTS6_288	SETD7	SETD7_HUMAN Histone-lysine N-methyltransferase SETD7 OS=Homo sapiens OX=9606 GN=SETD7 PE=1 SV=1	YC(BTD[C])ASLGHK|YC(BTD[C])ASLGHK	2|1	3.89|3.97	0.0|NA	3.93	0.05657	3	2
Q8TEX9	708	Q8TEX9_708	IPO4	IPO4_HUMAN Importin-4 OS=Homo sapiens OX=9606 GN=IPO4 PE=1 SV=2	|LLEC(BTD[C])PHLNVR	|3	|3.89	|0.97603	3.89	NA	3	1
O00410	180	O00410_180	IPO5	IPO5_HUMAN Importin-5 OS=Homo sapiens OX=9606 GN=IPO5 PE=1 SV=4	|MLVQC(BTD[C])MQDQEHPSIR	|2	|3.875	|0.78489	3.875	NA	2	1
Q06481	80	Q06481_80	APLP2	APLP2_HUMAN Amyloid-like protein 2 OS=Homo sapiens OX=9606 GN=APLP2 PE=1 SV=2	SC(BTD[C])FETK|	1|	3.85|	NA|	3.85	NA	1	1
P53618	143	P53618_143	COPB1	COPB_HUMAN Coatomer subunit beta OS=Homo sapiens OX=9606 GN=COPB1 PE=1 SV=3	|AC(BTD[C])LEHR	|2	|3.83	|0.09899	3.83	NA	2	1
O15400	28	O15400_28	STX7	STX7_HUMAN Syntaxin-7 OS=Homo sapiens OX=9606 GN=STX7 PE=1 SV=4	ITQC(BTD[C])SVEIQR|	1|	3.82|	NA|	3.82	NA	1	1
P49327	1186	P49327_1186	FASN	FAS_HUMAN Fatty acid synthase OS=Homo sapiens OX=9606 GN=FASN PE=1 SV=3	LLSAAC(BTD[C])R|LLSAAC(BTD[C])R	2|1	3.8|3.82	0.24042|NA	3.81	0.01414	3	2
P13639	693	P13639_693	EEF2	EF2_HUMAN Elongation factor 2 OS=Homo sapiens OX=9606 GN=EEF2 PE=1 SV=4	EGALC(BTD[C])EENMR|EGALC(BTD[C])EENMR	2|2	4.15|3.465	0.0|0.00707	3.8075	0.48437	4	2
Q99613	500	Q99613_500	EIF3C	EIF3C_HUMAN Eukaryotic translation initiation factor 3 subunit C OS=Homo sapiens OX=9606 GN=EIF3C PE=1 SV=1	GTTEEVC(BTD[C])R|	1|	3.79|	NA|	3.79	NA	1	1
Q9BXJ9	309	Q9BXJ9_309	NAA15	NAA15_HUMAN N-alpha-acetyltransferase 15, NatA auxiliary subunit OS=Homo sapiens OX=9606 GN=NAA15 PE=1 SV=1	|FKEC(BTD[C])LDK	|1	|3.74	|NA	3.74	NA	1	1
P21980	27	P21980_27	TGM2	TGM2_HUMAN Protein-glutamine gamma-glutamyltransferase 2 OS=Homo sapiens OX=9606 GN=TGM2 PE=1 SV=2	|DHHTADLC(BTD[C])R	|2	|3.73	|0.02828	3.73	NA	2	1
P18031	215	P18031_215	PTPN1	PTN1_HUMAN Tyrosine-protein phosphatase non-receptor type 1 OS=Homo sapiens OX=9606 GN=PTPN1 PE=1 SV=1	ESGSLSPEHGPVVVHC(BTD[C])SAGIGR|	1|	3.72|	NA|	3.72	NA	1	1
Q9Y490	286	Q9Y490_286	TLN1	TLN1_HUMAN Talin-1 OS=Homo sapiens OX=9606 GN=TLN1 PE=1 SV=3	NC(BTD[C])GQMSEIEAK|	1|	3.72|	NA|	3.72	NA	1	1
Q99805	194	Q99805_194	TM9SF2	TM9S2_HUMAN Transmembrane 9 superfamily member 2 OS=Homo sapiens OX=9606 GN=TM9SF2 PE=1 SV=1	|DAC(BTD[C])VISSDFHER	|1	|3.69	|NA	3.69	NA	1	1
Q9NRL2	621	Q9NRL2_621	BAZ1A	BAZ1A_HUMAN Bromodomain adjacent to zinc finger domain protein 1A OS=Homo sapiens OX=9606 GN=BAZ1A PE=1 SV=2	ILHALC(BTD[C])GK|	1|	3.68|	NA|	3.68	NA	1	1
P18206	737	P18206_737	VCL	VINC_HUMAN Vinculin OS=Homo sapiens OX=9606 GN=VCL PE=1 SV=4	|DLDKC(BTD[C])K	|1	|3.65	|NA	3.65	NA	1	1
P04632	144	P04632_144	CAPNS1	CPNS1_HUMAN Calpain small subunit 1 OS=Homo sapiens OX=9606 GN=CAPNS1 PE=1 SV=1	|TDGFGIDTC(BTD[C])R	|1	|3.63	|NA	3.63	NA	1	1
O95208	96	O95208_96	EPN2	EPN2_HUMAN Epsin-2 OS=Homo sapiens OX=9606 GN=EPN2 PE=1 SV=3	VAQQC(BTD[C])R|	1|	3.6|	NA|	3.6	NA	1	1
Q15363	93	Q15363_93	TMED2	TMED2_HUMAN Transmembrane emp24 domain-containing protein 2 OS=Homo sapiens OX=9606 GN=TMED2 PE=1 SV=1	|FC(BTD[C])FSNR	|1	|3.6	|NA	3.6	NA	1	1
Q15024	238	Q15024_238	EXOSC7	EXOS7_HUMAN Exosome complex component RRP42 OS=Homo sapiens OX=9606 GN=EXOSC7 PE=1 SV=3	GVVTC(BTD[C])MR|	1|	3.58|	NA|	3.58	NA	1	1
P13796	164	P13796_164	LCP1	PLSL_HUMAN Plastin-2 OS=Homo sapiens OX=9606 GN=LCP1 PE=1 SV=6	|AVGDGIVLC(BTD[C])K	|1	|3.56	|NA	3.56	NA	1	1
P17812	491	P17812_491	CTPS1	PYRG1_HUMAN CTP synthase 1 OS=Homo sapiens OX=9606 GN=CTPS1 PE=1 SV=2	KC(BTD[C])LEEQGLK|KC(BTD[C])LEEQGLK	2|2	3.35|3.73	0.0|0.08485	3.54	0.2687	4	2
O95373	504	O95373_504	IPO7	IPO7_HUMAN Importin-7 OS=Homo sapiens OX=9606 GN=IPO7 PE=1 SV=1	RC(BTD[C])LIDDR|	2|	3.53|	0.0|	3.53	NA	2	1
P22234	281	P22234_281	PAICS	PUR6_HUMAN Multifunctional protein ADE2 OS=Homo sapiens OX=9606 GN=PAICS PE=1 SV=3	VVVLMGSTSDLGHC(BTD[C])EK|	1|	3.49|	NA|	3.49	NA	1	1
P09234	25	P09234_25	SNRPC	RU1C_HUMAN U1 small nuclear ribonucleoprotein C OS=Homo sapiens OX=9606 GN=SNRPC PE=1 SV=1	KTHC(BTD[C])SGR THC(BTD[C])SGR|THC(BTD[C])SGR KTHC(BTD[C])SGR	7|2	4.01|2.93	0.157|1.18794	3.47	0.76368	9	2
P25786	92	P25786_92	PSMA1	PSA1_HUMAN Proteasome subunit alpha type-1 OS=Homo sapiens OX=9606 GN=PSMA1 PE=1 SV=1	QEC(BTD[C])LDSR|	1|	3.45|	NA|	3.45	NA	1	1
Q92688	27	Q92688_27	ANP32B	AN32B_HUMAN Acidic leucine-rich nuclear phosphoprotein 32 family member B OS=Homo sapiens OX=9606 GN=ANP32B PE=1 SV=1	ELVLDNC(BTD[C])K|	1|	3.45|	NA|	3.45	NA	1	1
Q96RS6	376	Q96RS6_376	NUDCD1	NUDC1_HUMAN NudC domain-containing protein 1 OS=Homo sapiens OX=9606 GN=NUDCD1 PE=1 SV=2	|DSAQC(BTD[C])AAIAER	|1	|3.45	|NA	3.45	NA	1	1
Q9UKD2	33	Q9UKD2_33	MRTO4	MRT4_HUMAN mRNA turnover protein 4 homolog OS=Homo sapiens OX=9606 GN=MRTO4 PE=1 SV=2	KC(BTD[C])VDTYK|KC(BTD[C])VDTYK	2|2	3.495|3.4	0.71418|0.39598	3.4475	0.06718	4	2
Q8WYA6	370	Q8WYA6_370	CTNNBL1	CTBL1_HUMAN Beta-catenin-like protein 1 OS=Homo sapiens OX=9606 GN=CTNNBL1 PE=1 SV=1	VLDHAMIGPEGTDNC(BTD[C])HK|	1|	3.42|	NA|	3.42	NA	1	1
O00410	733	O00410_733	IPO5	IPO5_HUMAN Importin-5 OS=Homo sapiens OX=9606 GN=IPO5 PE=1 SV=4	|VAAAESMPLLLEC(BTD[C])AR	|1	|3.41	|NA	3.41	NA	1	1
O75369	2333	O75369_2333	FLNB	FLNB_HUMAN Filamin-B OS=Homo sapiens OX=9606 GN=FLNB PE=1 SV=2	VHSPSGAVEEC(BTD[C])HVSELEPDK|VHSPSGAVEEC(BTD[C])HVSELEPDK	2|3	3.62|3.18	0.11314|1.17286	3.4	0.31113	5	2
Q00610	436	Q00610_436	CLTC	CLH1_HUMAN Clathrin heavy chain 1 OS=Homo sapiens OX=9606 GN=CLTC PE=1 SV=5	|YESLELC(BTD[C])R	|2	|3.4	|0.02828	3.4	NA	2	1
Q8IZ83	350	Q8IZ83_350	ALDH16A1	A16A1_HUMAN Aldehyde dehydrogenase family 16 member A1 OS=Homo sapiens OX=9606 GN=ALDH16A1 PE=1 SV=2	GAAAC(BTD[C])DLVQR|	1|	3.4|	NA|	3.4	NA	1	1
Q5RKV6	248	Q5RKV6_248	EXOSC6	EXOS6_HUMAN Exosome complex component MTR3 OS=Homo sapiens OX=9606 GN=EXOSC6 PE=1 SV=1	LGLEGC(BTD[C])QR|LGLEGC(BTD[C])QR	1|1	3.4|3.39	NA|NA	3.395	0.00707	2	2
O00154	288	O00154_288	ACOT7	BACH_HUMAN Cytosolic acyl coenzyme A thioester hydrolase OS=Homo sapiens OX=9606 GN=ACOT7 PE=1 SV=3	KGC(BTD[C])VITISGR|KGC(BTD[C])VITISGR	1|1	3.62|3.16	NA|NA	3.39	0.32527	2	2
Q9NYU2	1024	Q9NYU2_1024	UGGT1	UGGG1_HUMAN UDP-glucose:glycoprotein glucosyltransferase 1 OS=Homo sapiens OX=9606 GN=UGGT1 PE=1 SV=3	VFMNC(BTD[C])QSK|VFMNC(BTD[C])QSK	2|1	3.26|3.49	0.0|NA	3.375	0.16263	3	2
O00116	541	O00116_541	AGPS	ADAS_HUMAN Alkyldihydroxyacetonephosphate synthase, peroxisomal OS=Homo sapiens OX=9606 GN=AGPS PE=1 SV=1	VVDLC(BTD[C])R|VVDLC(BTD[C])R	2|2	4.04|2.7	0.0|0.0	3.37	0.94752	4	2
O75369	2537	O75369_2537	FLNB	FLNB_HUMAN Filamin-B OS=Homo sapiens OX=9606 GN=FLNB PE=1 SV=2	|SSFLVDC(BTD[C])SK	|1	|3.36	|NA	3.36	NA	1	1
Q8TEX9	782	Q8TEX9_782	IPO4	IPO4_HUMAN Importin-4 OS=Homo sapiens OX=9606 GN=IPO4 PE=1 SV=2	SC(BTD[C])GTLTLKPPGR|SC(BTD[C])GTLTLKPPGR	1|1	3.13|3.56	NA|NA	3.345	0.30406	2	2
O75962	1220	O75962_1220	TRIO	TRIO_HUMAN Triple functional domain protein OS=Homo sapiens OX=9606 GN=TRIO PE=1 SV=2	KC(BTD[C])VTAVDK|	1|	3.33|	NA|	3.33	NA	1	1
P11387	733	P11387_733	TOP1	TOP1_HUMAN DNA topoisomerase 1 OS=Homo sapiens OX=9606 GN=TOP1 PE=1 SV=2	|ITVAWC(BTD[C])K	|1	|3.33	|NA	3.33	NA	1	1
P14866	581	P14866_581	HNRNPL	HNRPL_HUMAN Heterogeneous nuclear ribonucleoprotein L OS=Homo sapiens OX=9606 GN=HNRNPL PE=1 SV=2	|LC(BTD[C])FSTAQHAS	|2	|3.33	|0.0	3.33	NA	2	1
P07900	572	P07900_572	HSP90AA1	HS90A_HUMAN Heat shock protein HSP 90-alpha OS=Homo sapiens OX=9606 GN=HSP90AA1 PE=1 SV=5	|TKFENLC(BTD[C])K	|1	|3.32	|NA	3.32	NA	1	1
Q15436	180	Q15436_180	SEC23A	SC23A_HUMAN Protein transport protein Sec23A OS=Homo sapiens OX=9606 GN=SEC23A PE=1 SV=2	|MVQVHELGC(BTD[C])EGISK	|1	|3.31	|NA	3.31	NA	1	1
Q6P587	22	Q6P587_22	FAHD1	FAHD1_HUMAN Acylpyruvase FAHD1, mitochondrial OS=Homo sapiens OX=9606 GN=FAHD1 PE=1 SV=2	NIVC(BTD[C])VGR|	1|	3.31|	NA|	3.31	NA	1	1
P06400	666	P06400_666	RB1	RB_HUMAN Retinoblastoma-associated protein OS=Homo sapiens OX=9606 GN=RB1 PE=1 SV=2	LNTLC(BTD[C])ER|	2|	3.3|	0.0|	3.3	NA	2	1
P55060	195	P55060_195	CSE1L	XPO2_HUMAN Exportin-2 OS=Homo sapiens OX=9606 GN=CSE1L PE=1 SV=3	|ATIELC(BTD[C])STHANDASALR	|1	|3.29	|NA	3.29	NA	1	1
Q13813	1622	Q13813_1622	SPTAN1	SPTN1_HUMAN Spectrin alpha chain, non-erythrocytic 1 OS=Homo sapiens OX=9606 GN=SPTAN1 PE=1 SV=3	|GAC(BTD[C])AGSEDAVK	|1	|3.29	|NA	3.29	NA	1	1
P39748	141	P39748_141	FEN1	FEN1_HUMAN Flap endonuclease 1 OS=Homo sapiens OX=9606 GN=FEN1 PE=1 SV=1	QHNDEC(BTD[C])K|	1|	3.28|	NA|	3.28	NA	1	1
P19784	148	P19784_148	CSNK2A2	CSK22_HUMAN Casein kinase II subunit alpha' OS=Homo sapiens OX=9606 GN=CSNK2A2 PE=1 SV=1	ALDYC(BTD[C])HSK|ALDYC(BTD[C])HSK	1|4	3.21|3.29	NA|0.015	3.25	0.05657	5	2
Q14739	591	Q14739_591	LBR	LBR_HUMAN Delta(14)-sterol reductase LBR OS=Homo sapiens OX=9606 GN=LBR PE=1 SV=2	DEYHC(BTD[C])K|	3|	3.25|	0.0|	3.25	NA	3	1
Q08J23	93	Q08J23_93	NSUN2	NSUN2_HUMAN tRNA (cytosine(34)-C(5))-methyltransferase OS=Homo sapiens OX=9606 GN=NSUN2 PE=1 SV=2	EILHC(BTD[C])LK|EILHC(BTD[C])LK	3|1	3.54|2.92	0.0|NA	3.23	0.43841	4	2
P53396	1040	P53396_1040	ACLY	ACLY_HUMAN ATP-citrate synthase OS=Homo sapiens OX=9606 GN=ACLY PE=1 SV=3	NC(BTD[C])GSFTR|NC(BTD[C])GSFTR	1|1	3.14|3.31	NA|NA	3.225	0.12021	2	2
P49721	163	P49721_163	PSMB2	PSB2_HUMAN Proteasome subunit beta type-2 OS=Homo sapiens OX=9606 GN=PSMB2 PE=1 SV=1	|KC(BTD[C])LEELQK	|3	|3.22	|1.58305	3.22	NA	3	1
P62333	83	P62333_83	PSMC6	PRS10_HUMAN 26S proteasome regulatory subunit 10B OS=Homo sapiens OX=9606 GN=PSMC6 PE=1 SV=1	YVVGC(BTD[C])R|YVVGC(BTD[C])R	2|2	3.21|3.225	0.0|0.00707	3.2175	0.01061	4	2
Q13618	251	Q13618_251	CUL3	CUL3_HUMAN Cullin-3 OS=Homo sapiens OX=9606 GN=CUL3 PE=1 SV=2	VMHC(BTD[C])LDK|	2|	3.215|	0.82731|	3.215	NA	2	1
O95782	225	O95782_225	AP2A1	AP2A1_HUMAN AP-2 complex subunit alpha-1 OS=Homo sapiens OX=9606 GN=AP2A1 PE=1 SV=3	|TC(BTD[C])VSLAVSR	|1	|3.21	|NA	3.21	NA	1	1
P63208	120	P63208_120	SKP1	SKP1_HUMAN S-phase kinase-associated protein 1 OS=Homo sapiens OX=9606 GN=SKP1 PE=1 SV=2	|GLLDVTC(BTD[C])K	|1	|3.19	|NA	3.19	NA	1	1
Q14573	1236	Q14573_1236	ITPR3	ITPR3_HUMAN Inositol 1,4,5-trisphosphate receptor type 3 OS=Homo sapiens OX=9606 GN=ITPR3 PE=1 SV=2	FC(BTD[C])AGNPGNQALLHK|	1|	3.19|	NA|	3.19	NA	1	1
Q9H0H5	327	Q9H0H5_327	RACGAP1	RGAP1_HUMAN Rac GTPase-activating protein 1 OS=Homo sapiens OX=9606 GN=RACGAP1 PE=1 SV=1	VVSHPEC(BTD[C])R|	1|	3.19|	NA|	3.19	NA	1	1
Q9UQ80	149	Q9UQ80_149	PA2G4	PA2G4_HUMAN Proliferation-associated protein 2G4 OS=Homo sapiens OX=9606 GN=PA2G4 PE=1 SV=3	AAHLC(BTD[C])AEAALR|AAHLC(BTD[C])AEAALR	2|3	3.47|2.91	0.0|0.45033	3.19	0.39598	5	2
Q9P0L0	179	Q9P0L0_179	VAPA	VAPA_HUMAN Vesicle-associated membrane protein-associated protein A OS=Homo sapiens OX=9606 GN=VAPA PE=1 SV=3	KLMEEC(BTD[C])K LMEEC(BTD[C])K|LMEEC(BTD[C])K KLMEEC(BTD[C])K	4|6	3.125|3.25	0.38717|0.51439	3.1875	0.08839	10	2
P11177	249	P11177_249	PDHB	ODPB_HUMAN Pyruvate dehydrogenase E1 component subunit beta, mitochondrial OS=Homo sapiens OX=9606 GN=PDHB PE=1 SV=3	PVGHC(BTD[C])LEAAAVLSK|	1|	3.18|	NA|	3.18	NA	1	1
P33176	421	P33176_421	KIF5B	KINH_HUMAN Kinesin-1 heavy chain OS=Homo sapiens OX=9606 GN=KIF5B PE=1 SV=1	|KC(BTD[C])EEEIAK	|1	|3.15	|NA	3.15	NA	1	1
P15170	237	P15170_237	GSPT1	ERF3A_HUMAN Eukaryotic peptide chain release factor GTP-binding subunit ERF3A OS=Homo sapiens OX=9606 GN=GSPT1 PE=1 SV=1	YEEC(BTD[C])KEK|	1|	3.14|	NA|	3.14	NA	1	1
Q658Y4	750	Q658Y4_750	FAM91A1	F91A1_HUMAN Protein FAM91A1 OS=Homo sapiens OX=9606 GN=FAM91A1 PE=1 SV=3	IAAHGLC(BTD[C])R|	1|	3.14|	NA|	3.14	NA	1	1
P49327	779	P49327_779	FASN	FAS_HUMAN Fatty acid synthase OS=Homo sapiens OX=9606 GN=FASN PE=1 SV=3	GLKPSC(BTD[C])TIIPLMK|	1|	3.13|	NA|	3.13	NA	1	1
Q96AG4	131	Q96AG4_131	LRRC59	LRC59_HUMAN Leucine-rich repeat-containing protein 59 OS=Homo sapiens OX=9606 GN=LRRC59 PE=1 SV=1	|VAGDC(BTD[C])LDEK	|2	|3.13	|0.0	3.13	NA	2	1
O75083	325	O75083_325	WDR1	WDR1_HUMAN WD repeat-containing protein 1 OS=Homo sapiens OX=9606 GN=WDR1 PE=1 SV=4	|SIQC(BTD[C])LTVHK	|3	|3.12	|0.32332	3.12	NA	3	1
P62195	209	P62195_209	PSMC5	PRS8_HUMAN 26S proteasome regulatory subunit 8 OS=Homo sapiens OX=9606 GN=PSMC5 PE=1 SV=1	|AVAHHTDC(BTD[C])TFIR	|1	|3.12	|NA	3.12	NA	1	1
Q13418	428	Q13418_428	ILK	ILK_HUMAN Integrin-linked protein kinase OS=Homo sapiens OX=9606 GN=ILK PE=1 SV=2	IC(BTD[C])MNEDPAK|	1|	3.12|	NA|	3.12	NA	1	1
P31943	290	P31943_290	HNRNPH1	HNRH1_HUMAN Heterogeneous nuclear ribonucleoprotein H OS=Homo sapiens OX=9606 GN=HNRNPH1 PE=1 SV=4	YGDGGSTFQSTTGHC(BTD[C])VHMR|YGDGGSTFQSTTGHC(BTD[C])VHMR	3|2	2.98|3.22	0.85407|0.0	3.1	0.16971	5	2
Q9BVP2	131	Q9BVP2_131	GNL3	GNL3_HUMAN Guanine nucleotide-binding protein-like 3 OS=Homo sapiens OX=9606 GN=GNL3 PE=1 SV=2	LYC(BTD[C])QELK|	1|	3.1|	NA|	3.1	NA	1	1
P62937	161	P62937_161	PPIA	PPIA_HUMAN Peptidyl-prolyl cis-trans isomerase A OS=Homo sapiens OX=9606 GN=PPIA PE=1 SV=2	|KITIADC(BTD[C])GQLE	|3	|3.08	|0.70437	3.08	NA	3	1
P04843	545	P04843_545	RPN1	RPN1_HUMAN Dolichyl-diphosphooligosaccharide--protein glycosyltransferase subunit 1 OS=Homo sapiens OX=9606 GN=RPN1 PE=1 SV=1	TEGSDLC(BTD[C])DR|LKTEGSDLC(BTD[C])DR TEGSDLC(BTD[C])DR	2|2	3.25|2.9	0.0|0.73539	3.075	0.24749	4	2
P61247	201	P61247_201	RPS3A	RS3A_HUMAN 40S ribosomal protein S3a OS=Homo sapiens OX=9606 GN=RPS3A PE=1 SV=2	|AC(BTD[C])QSIYPLHDVFVR	|1	|3.07	|NA	3.07	NA	1	1
Q9Y490	1953	Q9Y490_1953	TLN1	TLN1_HUMAN Talin-1 OS=Homo sapiens OX=9606 GN=TLN1 PE=1 SV=3	ELIEC(BTD[C])AR|KELIEC(BTD[C])AR ELIEC(BTD[C])AR	1|2	2.49|3.65	NA|1.23037	3.07	0.82024	3	2
O00299	191	O00299_191	CLIC1	CLIC1_HUMAN Chloride intracellular channel protein 1 OS=Homo sapiens OX=9606 GN=CLIC1 PE=1 SV=4	LHIVQVVC(BTD[C])K|LHIVQVVC(BTD[C])K	1|1	3.73|2.4	NA|NA	3.065	0.94045	2	2
P49915	489	P49915_489	GMPS	GUAA_HUMAN GMP synthase [glutamine-hydrolyzing] OS=Homo sapiens OX=9606 GN=GMPS PE=1 SV=1	|VKAC(BTD[C])TTEEDQEK	|1	|3.06	|NA	3.06	NA	1	1
Q99805	56	Q99805_56	TM9SF2	TM9S2_HUMAN Transmembrane 9 superfamily member 2 OS=Homo sapiens OX=9606 GN=TM9SF2 PE=1 SV=1	KSDEC(BTD[C])K|	1|	3.05|	NA|	3.05	NA	1	1
P78527	1455	P78527_1455	PRKDC	PRKDC_HUMAN DNA-dependent protein kinase catalytic subunit OS=Homo sapiens OX=9606 GN=PRKDC PE=1 SV=3	|LAAVVSAC(BTD[C])K	|2	|3.04	|0.0	3.04	NA	2	1
Q9UG63	186	Q9UG63_186	ABCF2	ABCF2_HUMAN ATP-binding cassette sub-family F member 2 OS=Homo sapiens OX=9606 GN=ABCF2 PE=1 SV=2	LAHEDAEC(BTD[C])EK|LAHEDAEC(BTD[C])EK	4|1	2.965|3.11	0.06652|NA	3.0375	0.10253	5	2
Q8NFH3	222	Q8NFH3_222	NUP43	NUP43_HUMAN Nucleoporin Nup43 OS=Homo sapiens OX=9606 GN=NUP43 PE=1 SV=1	VPLHC(BTD[C])VDR|VPLHC(BTD[C])VDR	1|1	3.02|3.05	NA|NA	3.035	0.02121	2	2
P22234	266	P22234_266	PAICS	PUR6_HUMAN Multifunctional protein ADE2 OS=Homo sapiens OX=9606 GN=PAICS PE=1 SV=3	SESQC(BTD[C])R|SESQC(BTD[C])R	1|3	3.12|2.9	NA|0.01155	3.01	0.15556	4	2
P36776	909	P36776_909	LONP1	LONM_HUMAN Lon protease homolog, mitochondrial OS=Homo sapiens OX=9606 GN=LONP1 PE=1 SV=2	AGVTC(BTD[C])IVLPAENKK|	1|	3.0|	NA|	3	NA	1	1
Q6L8Q7	250	Q6L8Q7_250	PDE12	PDE12_HUMAN 2',5'-phosphodiesterase 12 OS=Homo sapiens OX=9606 GN=PDE12 PE=1 SV=2	LHC(BTD[C])TPGDGQR|LHC(BTD[C])TPGDGQR	2|1	3.01|2.99	0.0|NA	3	0.01414	3	2
O60684	296	O60684_296	KPNA6	IMA7_HUMAN Importin subunit alpha-7 OS=Homo sapiens OX=9606 GN=KPNA6 PE=1 SV=1	IQAVIDSGVC(BTD[C])R|IQAVIDSGVC(BTD[C])R	2|1	2.71|3.28	0.0|NA	2.995	0.40305	3	2
Q4G148	414	Q4G148_414	GXYLT1	GXLT1_HUMAN Glucoside xylosyltransferase 1 OS=Homo sapiens OX=9606 GN=GXYLT1 PE=1 SV=2	|TVHTYC(BTD[C])GK	|1	|2.99	|NA	2.99	NA	1	1
Q14152	478	Q14152_478	EIF3A	EIF3A_HUMAN Eukaryotic translation initiation factor 3 subunit A OS=Homo sapiens OX=9606 GN=EIF3A PE=1 SV=1	|HC(BTD[C])DLQVR	|1	|2.98	|NA	2.98	NA	1	1
Q9UHX1	129	Q9UHX1_129	PUF60	PUF60_HUMAN Poly(U)-binding-splicing factor PUF60 OS=Homo sapiens OX=9606 GN=PUF60 PE=1 SV=1	|ALAIMC(BTD[C])R	|1	|2.96	|NA	2.96	NA	1	1
P61978	145	P61978_145	HNRNPK	HNRPK_HUMAN Heterogeneous nuclear ribonucleoprotein K OS=Homo sapiens OX=9606 GN=HNRNPK PE=1 SV=1	|GSDFDC(BTD[C])ELR	|1	|2.95	|NA	2.95	NA	1	1
Q5JWF2	1022	Q5JWF2_1022	GNAS	GNAS1_HUMAN Guanine nucleotide-binding protein G(s) subunit alpha isoforms XLas OS=Homo sapiens OX=9606 GN=GNAS PE=1 SV=2	|VFNDC(BTD[C])R	|3	|2.94	|0.0	2.94	NA	3	1
Q9NYP7	61	Q9NYP7_61	ELOVL5	ELOV5_HUMAN Elongation of very long chain fatty acids protein 5 OS=Homo sapiens OX=9606 GN=ELOVL5 PE=1 SV=1	|NKQPFSC(BTD[C])R	|1	|2.94	|NA	2.94	NA	1	1
Q9Y490	1927	Q9Y490_1927	TLN1	TLN1_HUMAN Talin-1 OS=Homo sapiens OX=9606 GN=TLN1 PE=1 SV=3	|VQELGHGC(BTD[C])AALVTK	|4	|2.94	|0.86338	2.94	NA	4	1
P11142	603	P11142_603	HSPA8	HSP7C_HUMAN Heat shock cognate 71 kDa protein OS=Homo sapiens OX=9606 GN=HSPA8 PE=1 SV=1	VC(BTD[C])NPIITK|ELEKVC(BTD[C])NPIITK VC(BTD[C])NPIITK	4|5	3.025|2.85	0.06351|0.75261	2.9375	0.12374	9	2
Q00610	491	Q00610_491	CLTC	CLH1_HUMAN Clathrin heavy chain 1 OS=Homo sapiens OX=9606 GN=CLTC PE=1 SV=5	VIQC(BTD[C])FAETGQVQK|	1|	2.93|	NA|	2.93	NA	1	1
Q9ULJ7	135	Q9ULJ7_135	ANKRD50	ANR50_HUMAN Ankyrin repeat domain-containing protein 50 OS=Homo sapiens OX=9606 GN=ANKRD50 PE=1 SV=4	VAQLC(BTD[C])R|	2|	2.93|	0.0|	2.93	NA	2	1
O60218	187	O60218_187	AKR1B10	AK1BA_HUMAN Aldo-keto reductase family 1 member B10 OS=Homo sapiens OX=9606 GN=AKR1B10 PE=1 SV=2	|YKPVTNQVEC(BTD[C])HPYLTQEK	|2	|2.92	|0.01414	2.92	NA	2	1
P52789	375	P52789_375	HK2	HXK2_HUMAN Hexokinase-2 OS=Homo sapiens OX=9606 GN=HK2 PE=1 SV=2	IC(BTD[C])QIVSTR|	1|	2.92|	NA|	2.92	NA	1	1
P49773	84	P49773_84	HINT1	HINT1_HUMAN Histidine triad nucleotide-binding protein 1 OS=Homo sapiens OX=9606 GN=HINT1 PE=1 SV=2	KC(BTD[C])AADLGLNK|KC(BTD[C])AADLGLNK	1|3	3.04|2.79	NA|0.71014	2.915	0.17678	4	2
P13639	41	P13639_41	EEF2	EF2_HUMAN Elongation factor 2 OS=Homo sapiens OX=9606 GN=EEF2 PE=1 SV=4	|STLTDSLVC(BTD[C])K	|3	|2.87	|0.95095	2.87	NA	3	1
P53621	673	P53621_673	COPA	COPA_HUMAN Coatomer subunit alpha OS=Homo sapiens OX=9606 GN=COPA PE=1 SV=2	|ALDDKNC(BTD[C])WEK	|1	|2.87	|NA	2.87	NA	1	1
Q15061	291	Q15061_291	WDR43	WDR43_HUMAN WD repeat-containing protein 43 OS=Homo sapiens OX=9606 GN=WDR43 PE=1 SV=3	LAVVC(BTD[C])R|LAVVC(BTD[C])R	3|1	2.91|2.83	0.19053|NA	2.87	0.05657	4	2
Q8TEX9	797	Q8TEX9_797	IPO4	IPO4_HUMAN Importin-4 OS=Homo sapiens OX=9606 GN=IPO4 PE=1 SV=2	|LAELC(BTD[C])GVLK	|1	|2.87	|NA	2.87	NA	1	1
P16070	77	P16070_77	CD44	CD44_HUMAN CD44 antigen OS=Homo sapiens OX=9606 GN=CD44 PE=1 SV=3	|ALSIGFETC(BTD[C])R	|2	|2.86	|0.0	2.86	NA	2	1
Q9Y490	956	Q9Y490_956	TLN1	TLN1_HUMAN Talin-1 OS=Homo sapiens OX=9606 GN=TLN1 PE=1 SV=3	ASAGPQPLLVQSC(BTD[C])K|ASAGPQPLLVQSC(BTD[C])K	4|1	3.255|2.46	0.02887|NA	2.8575	0.56215	5	2
P55036	37	P55036_37	PSMD4	PSMD4_HUMAN 26S proteasome non-ATPase regulatory subunit 4 OS=Homo sapiens OX=9606 GN=PSMD4 PE=1 SV=1	|LQAQQDAVNIVC(BTD[C])HSK	|1	|2.85	|NA	2.85	NA	1	1
P49368	455	P49368_455	CCT3	TCPG_HUMAN T-complex protein 1 subunit gamma OS=Homo sapiens OX=9606 GN=CCT3 PE=1 SV=4	TLIQNC(BTD[C])GASTIR|TLIQNC(BTD[C])GASTIR	1|2	2.5|3.19	NA|0.14142	2.845	0.4879	3	2
P42765	179	P42765_179	ACAA2	THIM_HUMAN 3-ketoacyl-CoA thiolase, mitochondrial OS=Homo sapiens OX=9606 GN=ACAA2 PE=1 SV=2	EEC(BTD[C])DKYALQSQQR|	1|	2.84|	NA|	2.84	NA	1	1
Q00610	459	Q00610_459	CLTC	CLH1_HUMAN Clathrin heavy chain 1 OS=Homo sapiens OX=9606 GN=CLTC PE=1 SV=5	|EDKLEC(BTD[C])SEELGDLVK	|1	|2.84	|NA	2.84	NA	1	1
Q10567	144	Q10567_144	AP1B1	AP1B1_HUMAN AP-1 complex subunit beta-1 OS=Homo sapiens OX=9606 GN=AP1B1 PE=1 SV=2	|TAAVC(BTD[C])VAK	|2	|2.84	|0.02828	2.84	NA	2	1
Q14103	252	Q14103_252	HNRNPD	HNRPD_HUMAN Heterogeneous nuclear ribonucleoprotein D0 OS=Homo sapiens OX=9606 GN=HNRNPD PE=1 SV=1	|YHNVGLSKC(BTD[C])EIK	|4	|2.825	|0.07616	2.825	NA	4	1
Q9BTE1	114	Q9BTE1_114	DCTN5	DCTN5_HUMAN Dynactin subunit 5 OS=Homo sapiens OX=9606 GN=DCTN5 PE=1 SV=1	NC(BTD[C])VIGR|	2|	2.825|	0.00707|	2.825	NA	2	1
O60313	853	O60313_853	OPA1	OPA1_HUMAN Dynamin-like 120 kDa protein, mitochondrial OS=Homo sapiens OX=9606 GN=OPA1 PE=1 SV=3	TALNHC(BTD[C])NLCR|	1|	2.82|	NA|	2.82	NA	1	1
P09543	252	P09543_252	CNP	CN37_HUMAN 2',3'-cyclic-nucleotide 3'-phosphodiesterase OS=Homo sapiens OX=9606 GN=CNP PE=1 SV=2	RPPGVLHC(BTD[C])TTK|	1|	2.82|	NA|	2.82	NA	1	1
P63000	178	P63000_178	RAC1	RAC1_HUMAN Ras-related C3 botulinum toxin substrate 1 OS=Homo sapiens OX=9606 GN=RAC1 PE=1 SV=1	AVLC(BTD[C])PPPVK|AVLC(BTD[C])PPPVK	10|10	2.73|2.885	0.38711|0.50154	2.8075	0.1096	20	2
O76021	47	O76021_47	RSL1D1	RL1D1_HUMAN Ribosomal L1 domain-containing protein 1 OS=Homo sapiens OX=9606 GN=RSL1D1 PE=1 SV=3	AVDALLTHC(BTD[C])K|AVDALLTHC(BTD[C])K	2|3	3.495|2.11	0.03536|0.66395	2.8025	0.97934	5	2
O76003	146	O76003_146	GLRX3	GLRX3_HUMAN Glutaredoxin-3 OS=Homo sapiens OX=9606 GN=GLRX3 PE=1 SV=2	|LTHAAPC(BTD[C])MLFMK	|1	|2.78	|NA	2.78	NA	1	1
P04183	66	P04183_66	TK1	KITH_HUMAN Thymidine kinase, cytosolic OS=Homo sapiens OX=9606 GN=TK1 PE=1 SV=2	|YSSSFC(BTD[C])THDR	|2	|2.78	|0.0	2.78	NA	2	1
P48444	94	P48444_94	ARCN1	COPD_HUMAN Coatomer subunit delta OS=Homo sapiens OX=9606 GN=ARCN1 PE=1 SV=1	VIPEYC(BTD[C])R|VIPEYC(BTD[C])R	1|1	2.8|2.76	NA|NA	2.78	0.02828	2	2
Q9UQE7	972	Q9UQE7_972	SMC3	SMC3_HUMAN Structural maintenance of chromosomes protein 3 OS=Homo sapiens OX=9606 GN=SMC3 PE=1 SV=2	KLEQC(BTD[C])NTELKK KLEQC(BTD[C])NTELK|	3|	2.78|	0.31896|	2.78	NA	3	1
P78527	974	P78527_974	PRKDC	PRKDC_HUMAN DNA-dependent protein kinase catalytic subunit OS=Homo sapiens OX=9606 GN=PRKDC PE=1 SV=3	LAC(BTD[C])DVDQVTR|LAC(BTD[C])DVDQVTR	1|2	2.74|2.815	NA|0.0495	2.7775	0.05303	3	2
P55809	456	P55809_456	OXCT1	SCOT1_HUMAN Succinyl-CoA:3-ketoacid coenzyme A transferase 1, mitochondrial OS=Homo sapiens OX=9606 GN=OXCT1 PE=1 SV=1	IMEKC(BTD[C])TLPLTGK|	1|	2.77|	NA|	2.77	NA	1	1
P62942	23	P62942_23	FKBP1A	FKB1A_HUMAN Peptidyl-prolyl cis-trans isomerase FKBP1A OS=Homo sapiens OX=9606 GN=FKBP1A PE=1 SV=2	|GQTC(BTD[C])VVHYTGMLEDGK	|1	|2.77	|NA	2.77	NA	1	1
Q03405	67	Q03405_67	PLAUR	UPAR_HUMAN Urokinase plasminogen activator surface receptor OS=Homo sapiens OX=9606 GN=PLAUR PE=1 SV=1	SC(BTD[C])THSEK|	1|	2.77|	NA|	2.77	NA	1	1
Q9HDC9	409	Q9HDC9_409	APMAP	APMAP_HUMAN Adipocyte plasma membrane-associated protein OS=Homo sapiens OX=9606 GN=APMAP PE=1 SV=2	|SPFLC(BTD[C])R	|2	|2.77	|0.0	2.77	NA	2	1
Q93008	1061	Q93008_1061	USP9X	USP9X_HUMAN Probable ubiquitin carboxyl-terminal hydrolase FAF-X OS=Homo sapiens OX=9606 GN=USP9X PE=1 SV=3	AIC(BTD[C])LDHAK|AIC(BTD[C])LDHAK	1|1	2.23|3.3	NA|NA	2.765	0.7566	2	2
P36551	357	P36551_357	CPOX	HEM6_HUMAN Oxygen-dependent coproporphyrinogen-III oxidase, mitochondrial OS=Homo sapiens OX=9606 GN=CPOX PE=1 SV=3	|FVQSC(BTD[C])AR	|2	|2.76	|0.0	2.76	NA	2	1
A0AVT1	174	A0AVT1_174	UBA6	UBA6_HUMAN Ubiquitin-like modifier-activating enzyme 6 OS=Homo sapiens OX=9606 GN=UBA6 PE=1 SV=1	|INDFC(BTD[C])R	|1	|2.75	|NA	2.75	NA	1	1
Q9Y5B9	283	Q9Y5B9_283	SUPT16H	SP16H_HUMAN FACT complex subunit SPT16 OS=Homo sapiens OX=9606 GN=SUPT16H PE=1 SV=1	SYC(BTD[C])SNLVR|	1|	2.75|	NA|	2.75	NA	1	1
Q96B26	251	Q96B26_251	EXOSC8	EXOS8_HUMAN Exosome complex component RRP43 OS=Homo sapiens OX=9606 GN=EXOSC8 PE=1 SV=1	LQDC(BTD[C])MSR|LQDC(BTD[C])MSR	2|1	3.22|2.27	0.60811|NA	2.745	0.67175	3	2
P22392	109	P22392_109	NME2	NDKB_HUMAN Nucleoside diphosphate kinase B OS=Homo sapiens OX=9606 GN=NME2 PE=1 SV=1	|GDFC(BTD[C])IQVGR	|1	|2.74	|NA	2.74	NA	1	1
P34897	343	P34897_343	SHMT2	GLYM_HUMAN Serine hydroxymethyltransferase, mitochondrial OS=Homo sapiens OX=9606 GN=SHMT2 PE=1 SV=3	QAC(BTD[C])TPMFR|QAC(BTD[C])TPMFR	1|1	2.96|2.52	NA|NA	2.74	0.31113	2	2
P60866	36	P60866_36	RPS20	RS20_HUMAN 40S ribosomal protein S20 OS=Homo sapiens OX=9606 GN=RPS20 PE=1 SV=1	|VC(BTD[C])ADLIR	|2	|2.74	|0.0	2.74	NA	2	1
P61981	112	P61981_112	YWHAG	1433G_HUMAN 14-3-3 protein gamma OS=Homo sapiens OX=9606 GN=YWHAG PE=1 SV=2	NC(BTD[C])SETQYESK|	1|	2.74|	NA|	2.74	NA	1	1
Q6YN16	166	Q6YN16_166	HSDL2	HSDL2_HUMAN Hydroxysteroid dehydrogenase-like protein 2 OS=Homo sapiens OX=9606 GN=HSDL2 PE=1 SV=1	QHC(BTD[C])AYTIAK|	1|	2.74|	NA|	2.74	NA	1	1
Q8IYB3	33	Q8IYB3_33	SRRM1	SRRM1_HUMAN Serine/arginine repetitive matrix protein 1 OS=Homo sapiens OX=9606 GN=SRRM1 PE=1 SV=2	FAEC(BTD[C])LEK|	3|	2.74|	0.0|	2.74	NA	3	1
Q8TC07	197	Q8TC07_197	TBC1D15	TBC15_HUMAN TBC1 domain family member 15 OS=Homo sapiens OX=9606 GN=TBC1D15 PE=1 SV=2	TLLVNC(BTD[C])QNK|	1|	2.74|	NA|	2.74	NA	1	1
Q9UN37	60	Q9UN37_60	VPS4A	VPS4A_HUMAN Vacuolar protein sorting-associated protein 4A OS=Homo sapiens OX=9606 GN=VPS4A PE=1 SV=1	AKC(BTD[C])VQYLDR|	1|	2.74|	NA|	2.74	NA	1	1
P04406	247	P04406_247	GAPDH	G3P_HUMAN Glyceraldehyde-3-phosphate dehydrogenase OS=Homo sapiens OX=9606 GN=GAPDH PE=1 SV=3	|VPTANVSVVDLTC(BTD[C])R	|7	|2.73	|0.04928	2.73	NA	7	1
P09382	43	P09382_43	LGALS1	LEG1_HUMAN Galectin-1 OS=Homo sapiens OX=9606 GN=LGALS1 PE=1 SV=2	|DSNNLC(BTD[C])LHFNPR	|2	|2.73	|0.0	2.73	NA	2	1
P55060	61	P55060_61	CSE1L	XPO2_HUMAN Exportin-2 OS=Homo sapiens OX=9606 GN=CSE1L PE=1 SV=3	VC(BTD[C])ASVTFK|VC(BTD[C])ASVTFK	1|2	3.01|2.45	NA|0.0	2.73	0.39598	3	2
P62913	72	P62913_72	RPL11	RL11_HUMAN 60S ribosomal protein L11 OS=Homo sapiens OX=9606 GN=RPL11 PE=1 SV=2	IAVHC(BTD[C])TVR|IAVHC(BTD[C])TVR	3|6	2.88|2.565	0.13317|0.06369	2.7225	0.22274	9	2
P04183	185	P04183_185	TK1	KITH_HUMAN Thymidine kinase, cytosolic OS=Homo sapiens OX=9606 GN=TK1 PE=1 SV=2	YHSVC(BTD[C])R|	1|	2.71|	NA|	2.71	NA	1	1
Q01081	18	Q01081_18	U2AF1	U2AF1_HUMAN Splicing factor U2AF 35 kDa subunit OS=Homo sapiens OX=9606 GN=U2AF1 PE=1 SV=3	|VNC(BTD[C])SFYFK	|1	|2.71	|NA	2.71	NA	1	1
Q8WV22	40	Q8WV22_40	NSMCE1	NSE1_HUMAN Non-structural maintenance of chromosomes element 1 homolog OS=Homo sapiens OX=9606 GN=NSMCE1 PE=1 SV=5	LQTHC(BTD[C])YK|	1|	2.71|	NA|	2.71	NA	1	1
Q70J99	439	Q70J99_439	UNC13D	UN13D_HUMAN Protein unc-13 homolog D OS=Homo sapiens OX=9606 GN=UNC13D PE=1 SV=1	VLVQMC(BTD[C])K|VLVQMC(BTD[C])K	2|1	2.66|2.75	0.0|NA	2.705	0.06364	3	2
P63010	857	P63010_857	AP2B1	AP2B1_HUMAN AP-2 complex subunit beta OS=Homo sapiens OX=9606 GN=AP2B1 PE=1 SV=1	EC(BTD[C])HLNADTVSSK|	1|	2.7|	NA|	2.7	NA	1	1
Q96AE4	148	Q96AE4_148	FUBP1	FUBP1_HUMAN Far upstream element-binding protein 1 OS=Homo sapiens OX=9606 GN=FUBP1 PE=1 SV=3	|SC(BTD[C])MLTGTPESVQSAK	|1	|2.7	|NA	2.7	NA	1	1
P23396	119	P23396_119	RPS3	RS3_HUMAN 40S ribosomal protein S3 OS=Homo sapiens OX=9606 GN=RPS3 PE=1 SV=2	AC(BTD[C])YGVLR|AC(BTD[C])YGVLR	2|2	2.51|2.88	0.0|0.0	2.695	0.26163	4	2
P05198	70	P05198_70	EIF2S1	IF2A_HUMAN Eukaryotic translation initiation factor 2 subunit 1 OS=Homo sapiens OX=9606 GN=EIF2S1 PE=1 SV=3	|NEC(BTD[C])VVVIR	|1	|2.69	|NA	2.69	NA	1	1
P25398	108	P25398_108	RPS12	RS12_HUMAN 40S ribosomal protein S12 OS=Homo sapiens OX=9606 GN=RPS12 PE=1 SV=3	VVGCSC(BTD[C])VVVK|VVGCSC(BTD[C])VVVK	2|1	2.8|2.58	0.01414|NA	2.69	0.15556	3	2
Q02790	396	Q02790_396	FKBP4	FKBP4_HUMAN Peptidyl-prolyl cis-trans isomerase FKBP4 OS=Homo sapiens OX=9606 GN=FKBP4 PE=1 SV=3	|TQLAVC(BTD[C])QQR	|1	|2.69	|NA	2.69	NA	1	1
O14964	75	O14964_75	HGS	HGS_HUMAN Hepatocyte growth factor-regulated tyrosine kinase substrate OS=Homo sapiens OX=9606 GN=HGS PE=1 SV=1	|NC(BTD[C])GQTVHDEVANK	|1	|2.68	|NA	2.68	NA	1	1
P23526	195	P23526_195	AHCY	SAHH_HUMAN Adenosylhomocysteinase OS=Homo sapiens OX=9606 GN=AHCY PE=1 SV=4	|FDNLYGC(BTD[C])R	|1	|2.68	|NA	2.68	NA	1	1
P29144	710	P29144_710	TPP2	TPP2_HUMAN Tripeptidyl-peptidase 2 OS=Homo sapiens OX=9606 GN=TPP2 PE=1 SV=4	FC(BTD[C])SLPEK|	2|	2.68|	0.0|	2.68	NA	2	1
P35579	740	P35579_740	MYH9	MYH9_HUMAN Myosin-9 OS=Homo sapiens OX=9606 GN=MYH9 PE=1 SV=4	|QAC(BTD[C])VLMIK	|1	|2.68	|NA	2.68	NA	1	1
P53384	307	P53384_307	NUBP1	NUBP1_HUMAN Cytosolic Fe-S cluster assembly factor NUBP1 OS=Homo sapiens OX=9606 GN=NUBP1 PE=1 SV=2	|IQEFC(BTD[C])NLHQSK	|1	|2.68	|NA	2.68	NA	1	1
Q00610	736	Q00610_736	CLTC	CLH1_HUMAN Clathrin heavy chain 1 OS=Homo sapiens OX=9606 GN=CLTC PE=1 SV=5	YIQAAC(BTD[C])K|YIQAAC(BTD[C])K	4|4	2.765|2.595	0.23128|0.00577	2.68	0.12021	8	2
Q16181	204	Q16181_204	SEPTIN7	SEPT7_HUMAN Septin-7 OS=Homo sapiens OX=9606 GN=SEPTIN7 PE=1 SV=2	ADTLTPEEC(BTD[C])QQFKK|	1|	2.68|	NA|	2.68	NA	1	1
Q7Z2W4	15	Q7Z2W4_15	ZC3HAV1	ZCCHV_HUMAN Zinc finger CCCH-type antiviral protein 1 OS=Homo sapiens OX=9606 GN=ZC3HAV1 PE=1 SV=3	ILC(BTD[C])AHGGR|	1|	2.67|	NA|	2.67	NA	1	1
P54687	221	P54687_221	BCAT1	BCAT1_HUMAN Branched-chain-amino-acid aminotransferase, cytosolic OS=Homo sapiens OX=9606 GN=BCAT1 PE=1 SV=3	|GGTGDC(BTD[C])K	|1	|2.66	|NA	2.66	NA	1	1
Q92905	218	Q92905_218	COPS5	CSN5_HUMAN COP9 signalosome complex subunit 5 OS=Homo sapiens OX=9606 GN=COPS5 PE=1 SV=4	IEDFGVHC(BTD[C])K|	1|	2.66|	NA|	2.66	NA	1	1
Q9NUQ2	217	Q9NUQ2_217	AGPAT5	PLCE_HUMAN 1-acyl-sn-glycerol-3-phosphate acyltransferase epsilon OS=Homo sapiens OX=9606 GN=AGPAT5 PE=1 SV=3	ATHVAFDC(BTD[C])MK|	1|	2.66|	NA|	2.66	NA	1	1
P60660	32	P60660_32	MYL6	MYL6_HUMAN Myosin light polypeptide 6 OS=Homo sapiens OX=9606 GN=MYL6 PE=1 SV=2	ILYSQC(BTD[C])GDVMR|ILYSQC(BTD[C])GDVMR	2|2	2.63|2.685	0.01414|0.13435	2.6575	0.03889	4	2
Q14566	26	Q14566_26	MCM6	MCM6_HUMAN DNA replication licensing factor MCM6 OS=Homo sapiens OX=9606 GN=MCM6 PE=1 SV=1	|DEVAEKC(BTD[C])QK	|1	|2.64	|NA	2.64	NA	1	1
Q63HN8	2132	Q63HN8_2132	RNF213	RN213_HUMAN E3 ubiquitin-protein ligase RNF213 OS=Homo sapiens OX=9606 GN=RNF213 PE=1 SV=3	VTC(BTD[C])RPPK|	1|	2.64|	NA|	2.64	NA	1	1
Q9NSD9	151	Q9NSD9_151	FARSB	SYFB_HUMAN Phenylalanine--tRNA ligase beta subunit OS=Homo sapiens OX=9606 GN=FARSB PE=1 SV=3	LHQNIC(BTD[C])R|LHQNIC(BTD[C])R	1|2	2.66|2.62	NA|0.16971	2.64	0.02828	3	2
P20700	110	P20700_110	LMNB1	LMNB1_HUMAN Lamin-B1 OS=Homo sapiens OX=9606 GN=LMNB1 PE=1 SV=2	|LQIELGKC(BTD[C])K	|2	|2.625	|0.07778	2.625	NA	2	1
Q96AE4	132	Q96AE4_132	FUBP1	FUBP1_HUMAN Far upstream element-binding protein 1 OS=Homo sapiens OX=9606 GN=FUBP1 PE=1 SV=3	IQQESGC(BTD[C])K|IQQESGC(BTD[C])K	5|5	2.75|2.5	0.05367|0.03674	2.625	0.17678	10	2
P52907	124	P52907_124	CAPZA1	CAZA1_HUMAN F-actin-capping protein subunit alpha-1 OS=Homo sapiens OX=9606 GN=CAPZA1 PE=1 SV=3	ESC(BTD[C])DSALR|ESC(BTD[C])DSALR	2|1	2.315|2.93	0.00707|NA	2.6225	0.43487	3	2
P24928	1050	P24928_1050	POLR2A	RPB1_HUMAN DNA-directed RNA polymerase II subunit RPB1 OS=Homo sapiens OX=9606 GN=POLR2A PE=1 SV=2	STLC(BTD[C])SR|	1|	2.62|	NA|	2.62	NA	1	1
P29558	102	P29558_102	RBMS1	RBMS1_HUMAN RNA-binding motif, single-stranded-interacting protein 1 OS=Homo sapiens OX=9606 GN=RBMS1 PE=1 SV=3	TTNKC(BTD[C])K|	4|	2.62|	0.0263|	2.62	NA	4	1
P34897	91	P34897_91	SHMT2	GLYM_HUMAN Serine hydroxymethyltransferase, mitochondrial OS=Homo sapiens OX=9606 GN=SHMT2 PE=1 SV=3	|AALEALGSC(BTD[C])LNNK	|2	|2.62	|0.0	2.62	NA	2	1
P43243	821	P43243_821	MATR3	MATR3_HUMAN Matrin-3 OS=Homo sapiens OX=9606 GN=MATR3 PE=1 SV=2	NTHC(BTD[C])SSLPHYQK|NTHC(BTD[C])SSLPHYQK	1|1	2.35|2.89	NA|NA	2.62	0.38184	2	2
P16070	53	P16070_53	CD44	CD44_HUMAN CD44 antigen OS=Homo sapiens OX=9606 GN=CD44 PE=1 SV=3	TEAADLC(BTD[C])K|TEAADLC(BTD[C])K	2|2	2.63|2.58	0.0|0.0	2.605	0.03536	4	2
P61978	205	P61978_205	HNRNPK	HNRPK_HUMAN Heterogeneous nuclear ribonucleoprotein K OS=Homo sapiens OX=9606 GN=HNRNPK PE=1 SV=1	VVEC(BTD[C])IK|VVEC(BTD[C])IK	2|1	2.27|2.94	1.15966|NA	2.605	0.47376	3	2
Q9NZM1	225	Q9NZM1_225	MYOF	MYOF_HUMAN Myoferlin OS=Homo sapiens OX=9606 GN=MYOF PE=1 SV=1	VHVC(BTD[C])GQTHR|VHVC(BTD[C])GQTHR	2|1	2.675|2.52	0.00707|NA	2.5975	0.1096	3	2
Q9BQG0	890	Q9BQG0_890	MYBBP1A	MBB1A_HUMAN Myb-binding protein 1A OS=Homo sapiens OX=9606 GN=MYBBP1A PE=1 SV=2	RYC(BTD[C])HDLGER YC(BTD[C])HDLGER|RYC(BTD[C])HDLGER YC(BTD[C])HDLGER	2|2	2.99|2.2	0.49497|1.13137	2.595	0.55861	4	2
O60306	250	O60306_250	AQR	AQR_HUMAN RNA helicase aquarius OS=Homo sapiens OX=9606 GN=AQR PE=1 SV=4	VHYC(BTD[C])ER|	1|	2.59|	NA|	2.59	NA	1	1
P33992	570	P33992_570	MCM5	MCM5_HUMAN DNA replication licensing factor MCM5 OS=Homo sapiens OX=9606 GN=MCM5 PE=1 SV=5	VKC(BTD[C])GPR|	1|	2.59|	NA|	2.59	NA	1	1
Q8TEQ6	240	Q8TEQ6_240	GEMIN5	GEMI5_HUMAN Gem-associated protein 5 OS=Homo sapiens OX=9606 GN=GEMIN5 PE=1 SV=3	GC(BTD[C])YLATGSK|	1|	2.59|	NA|	2.59	NA	1	1
P35579	172	P35579_172	MYH9	MYH9_HUMAN Myosin-9 OS=Homo sapiens OX=9606 GN=MYH9 PE=1 SV=4	EDQSILC(BTD[C])TGESGAGK|	2|	2.58|	0.43841|	2.58	NA	2	1
P49959	75	P49959_75	MRE11	MRE11_HUMAN Double-strand break repair protein MRE11 OS=Homo sapiens OX=9606 GN=MRE11 PE=1 SV=3	|TLHTC(BTD[C])LELLR	|1	|2.58	|NA	2.58	NA	1	1
Q2TAY7	416	Q2TAY7_416	SMU1	SMU1_HUMAN WD40 repeat-containing protein SMU1 OS=Homo sapiens OX=9606 GN=SMU1 PE=1 SV=2	NPEHFVVC(BTD[C])NR|	1|	2.58|	NA|	2.58	NA	1	1
Q9UQE7	939	Q9UQE7_939	SMC3	SMC3_HUMAN Structural maintenance of chromosomes protein 3 OS=Homo sapiens OX=9606 GN=SMC3 PE=1 SV=2	KKEEC(BTD[C])MK|	1|	2.58|	NA|	2.58	NA	1	1
P13639	591	P13639_591	EEF2	EF2_HUMAN Elongation factor 2 OS=Homo sapiens OX=9606 GN=EEF2 PE=1 SV=4	|ETVSEESNVLC(BTD[C])LSK	|1	|2.57	|NA	2.57	NA	1	1
P26006	140	P26006_140	ITGA3	ITA3_HUMAN Integrin alpha-3 OS=Homo sapiens OX=9606 GN=ITGA3 PE=1 SV=5	VLVC(BTD[C])AHR|VLVC(BTD[C])AHR	3|2	2.29|2.85	0.83483|0.50912	2.57	0.39598	5	2
P60174	104	P60174_104	TPI1	TPIS_HUMAN Triosephosphate isomerase OS=Homo sapiens OX=9606 GN=TPI1 PE=1 SV=3	IAVAAQNC(BTD[C])YK|IAVAAQNC(BTD[C])YK	4|6	2.65|2.49	0.61283|0.73729	2.57	0.11314	10	2
Q9NP79	155	Q9NP79_155	VTA1	VTA1_HUMAN Vacuolar protein sorting-associated protein VTA1 homolog OS=Homo sapiens OX=9606 GN=VTA1 PE=1 SV=1	|ATYIHNC(BTD[C])LK	|1	|2.57	|NA	2.57	NA	1	1
Q9Y606	260	Q9Y606_260	PUS1	TRUA_HUMAN tRNA pseudouridine synthase A OS=Homo sapiens OX=9606 GN=PUS1 PE=1 SV=3	GPQDPSAC(BTD[C])R|	1|	2.57|	NA|	2.57	NA	1	1
P34932	779	P34932_779	HSPA4	HSP74_HUMAN Heat shock 70 kDa protein 4 OS=Homo sapiens OX=9606 GN=HSPA4 PE=1 SV=4	ELTSTC(BTD[C])SPIISK|ELTSTC(BTD[C])SPIISK	2|2	2.29|2.84	0.0|0.07071	2.565	0.38891	4	2
P18206	1053	P18206_1053	VCL	VINC_HUMAN Vinculin OS=Homo sapiens OX=9606 GN=VCL PE=1 SV=4	|TNLLQVC(BTD[C])ER	|2	|2.56	|0.01414	2.56	NA	2	1
P35579	931	P35579_931	MYH9	MYH9_HUMAN Myosin-9 OS=Homo sapiens OX=9606 GN=MYH9 PE=1 SV=4	VEEEEERC(BTD[C])QHLQAEK|VEEEEERC(BTD[C])QHLQAEK	3|1	2.74|2.38	0.16462|NA	2.56	0.25456	4	2
Q13813	956	Q13813_956	SPTAN1	SPTN1_HUMAN Spectrin alpha chain, non-erythrocytic 1 OS=Homo sapiens OX=9606 GN=SPTAN1 PE=1 SV=3	EQAQSC(BTD[C])R|EQAQSC(BTD[C])R	2|3	2.58|2.54	0.0|0.00577	2.56	0.02828	5	2
Q15057	53	Q15057_53	ACAP2	ACAP2_HUMAN Arf-GAP with coiled-coil, ANK repeat and PH domain-containing protein 2 OS=Homo sapiens OX=9606 GN=ACAP2 PE=1 SV=3	AFC(BTD[C])VANK|	1|	2.56|	NA|	2.56	NA	1	1
O00264	129	O00264_129	PGRMC1	PGRC1_HUMAN Membrane-associated progesterone receptor component 1 OS=Homo sapiens OX=9606 GN=PGRMC1 PE=1 SV=3	|GLATFC(BTD[C])LDK	|2	|2.55	|0.0	2.55	NA	2	1
P49368	372	P49368_372	CCT3	TCPG_HUMAN T-complex protein 1 subunit gamma OS=Homo sapiens OX=9606 GN=CCT3 PE=1 SV=4	|AC(BTD[C])TILLR	|2	|2.55	|0.0	2.55	NA	2	1
P49915	554	P49915_554	GMPS	GUAA_HUMAN GMP synthase [glutamine-hydrolyzing] OS=Homo sapiens OX=9606 GN=GMPS PE=1 SV=1	MC(BTD[C])HNVNR|MC(BTD[C])HNVNR	1|7	2.62|2.48	NA|0.11908	2.55	0.09899	8	2
Q00610	753	Q00610_753	CLTC	CLH1_HUMAN Clathrin heavy chain 1 OS=Homo sapiens OX=9606 GN=CLTC PE=1 SV=5	|ESNC(BTD[C])YDPER	|1	|2.55	|NA	2.55	NA	1	1
Q15149	3110	Q15149_3110	PLEC	PLEC_HUMAN Plectin OS=Homo sapiens OX=9606 GN=PLEC PE=1 SV=3	|LC(BTD[C])FEGLR	|1	|2.55	|NA	2.55	NA	1	1
Q9HB71	154	Q9HB71_154	CACYBP	CYBP_HUMAN Calcyclin-binding protein OS=Homo sapiens OX=9606 GN=CACYBP PE=1 SV=2	|TDTVLILC(BTD[C])R	|1	|2.55	|NA	2.55	NA	1	1
Q9Y221	153	Q9Y221_153	NIP7	NIP7_HUMAN 60S ribosome subunit biogenesis protein NIP7 homolog OS=Homo sapiens OX=9606 GN=NIP7 PE=1 SV=1	STQDC(BTD[C])R|	3|	2.55|	0.01155|	2.55	NA	3	1
P49792	3032	P49792_3032	RANBP2	RBP2_HUMAN E3 SUMO-protein ligase RanBP2 OS=Homo sapiens OX=9606 GN=RANBP2 PE=1 SV=2	EVADC(BTD[C])FKK|EVADC(BTD[C])FKK	2|1	2.58|2.51	0.0|NA	2.545	0.0495	3	2
P55010	304	P55010_304	EIF5	IF5_HUMAN Eukaryotic translation initiation factor 5 OS=Homo sapiens OX=9606 GN=EIF5 PE=1 SV=2	FC(BTD[C])HNNK|FC(BTD[C])HNNK	1|1	2.81|2.28	NA|NA	2.545	0.37477	2	2
P62937	52	P62937_52	PPIA	PPIA_HUMAN Peptidyl-prolyl cis-trans isomerase A OS=Homo sapiens OX=9606 GN=PPIA PE=1 SV=2	GSC(BTD[C])FHR|GSC(BTD[C])FHR	4|3	2.62|2.47	0.03464|0.45033	2.545	0.10607	7	2
P13796	42	P13796_42	LCP1	PLSL_HUMAN Plastin-2 OS=Homo sapiens OX=9606 GN=LCP1 PE=1 SV=6	|AAC(BTD[C])LPLPGYR	|3	|2.54	|0.00577	2.54	NA	3	1
Q9UQ35	2130	Q9UQ35_2130	SRRM2	SRRM2_HUMAN Serine/arginine repetitive matrix protein 2 OS=Homo sapiens OX=9606 GN=SRRM2 PE=1 SV=2	PSMSPTPLDRC(BTD[C])R|	1|	2.54|	NA|	2.54	NA	1	1
Q15020	527	Q15020_527	SART3	SART3_HUMAN Squamous cell carcinoma antigen recognized by T-cells 3 OS=Homo sapiens OX=9606 GN=SART3 PE=1 SV=1	AHGDTQHC(BTD[C])R|	1|	2.53|	NA|	2.53	NA	1	1
Q9NQ29	59	Q9NQ29_59	LUC7L	LUC7L_HUMAN Putative RNA-binding protein Luc7-like 1 OS=Homo sapiens OX=9606 GN=LUC7L PE=1 SV=1	MDLGEC(BTD[C])TK|	1|	2.53|	NA|	2.53	NA	1	1
P09651	175	P09651_175	HNRNPA1	ROA1_HUMAN Heterogeneous nuclear ribonucleoprotein A1 OS=Homo sapiens OX=9606 GN=HNRNPA1 PE=1 SV=5	YHTVNGHNC(BTD[C])EVR GHNC(BTD[C])EVR|YHTVNGHNC(BTD[C])EVR GHNC(BTD[C])EVR	6|4	2.435|2.615	0.28619|0.40869	2.525	0.12728	10	2
Q15041	109	Q15041_109	ARL6IP1	AR6P1_HUMAN ADP-ribosylation factor-like protein 6-interacting protein 1 OS=Homo sapiens OX=9606 GN=ARL6IP1 PE=1 SV=2	FHEIC(BTD[C])SNLVK|	2|	2.52|	0.0|	2.52	NA	2	1
Q96PU8	119	Q96PU8_119	QKI	QKI_HUMAN Protein quaking OS=Homo sapiens OX=9606 GN=QKI PE=1 SV=1	QLEAETGC(BTD[C])K|	1|	2.52|	NA|	2.52	NA	1	1
Q9Y3E5	86	Q9Y3E5_86	PTRH2	PTH2_HUMAN Peptidyl-tRNA hydrolase 2, mitochondrial OS=Homo sapiens OX=9606 GN=PTRH2 PE=1 SV=1	VAAQC(BTD[C])SHAAVSAYK|VAAQC(BTD[C])SHAAVSAYK	3|1	2.67|2.36	0.45611|NA	2.515	0.2192	4	2
P29317	753	P29317_753	EPHA2	EPHA2_HUMAN Ephrin type-A receptor 2 OS=Homo sapiens OX=9606 GN=EPHA2 PE=1 SV=2	|NILVNSNLVC(BTD[C])K	|1	|2.51	|NA	2.51	NA	1	1
Q8NBS9	381	Q8NBS9_381	TXNDC5	TXND5_HUMAN Thioredoxin domain-containing protein 5 OS=Homo sapiens OX=9606 GN=TXNDC5 PE=1 SV=2	IAEVDC(BTD[C])TAER|IAEVDC(BTD[C])TAER	1|2	1.96|3.06	NA|0.0	2.51	0.77782	3	2
P61247	96	P61247_96	RPS3A	RS3A_HUMAN 40S ribosomal protein S3a OS=Homo sapiens OX=9606 GN=RPS3A PE=1 SV=2	NC(BTD[C])LTNFHGMDLTR|NC(BTD[C])LTNFHGMDLTR	1|1	2.32|2.68	NA|NA	2.5	0.25456	2	2
P63104	25	P63104_25	YWHAZ	1433Z_HUMAN 14-3-3 protein zeta/delta OS=Homo sapiens OX=9606 GN=YWHAZ PE=1 SV=1	YDDMAAC(BTD[C])MK|YDDMAAC(BTD[C])MK	1|11	2.53|2.46	NA|0.17457	2.495	0.0495	12	2
O94776	209	O94776_209	MTA2	MTA2_HUMAN Metastasis-associated protein MTA2 OS=Homo sapiens OX=9606 GN=MTA2 PE=1 SV=1	|ALDC(BTD[C])SSSIR	|1	|2.49	|NA	2.49	NA	1	1
Q96CN7	93	Q96CN7_93	ISOC1	ISOC1_HUMAN Isochorismatase domain-containing protein 1 OS=Homo sapiens OX=9606 GN=ISOC1 PE=1 SV=3	GFAVSERC(BTD[C])K|	1|	2.49|	NA|	2.49	NA	1	1
Q96D53	508	Q96D53_508	COQ8B	COQ8B_HUMAN Atypical kinase COQ8B, mitochondrial OS=Homo sapiens OX=9606 GN=COQ8B PE=1 SV=2	AHIAC(BTD[C])R|	1|	2.49|	NA|	2.49	NA	1	1
O00410	972	O00410_972	IPO5	IPO5_HUMAN Importin-5 OS=Homo sapiens OX=9606 GN=IPO5 PE=1 SV=4	TKENVNATENC(BTD[C])ISAVGK|TKENVNATENC(BTD[C])ISAVGK ENVNATENC(BTD[C])ISAVGK	1|3	2.5|2.46	NA|0.10392	2.48	0.02828	4	2
Q5JTH9	261	Q5JTH9_261	RRP12	RRP12_HUMAN RRP12-like protein OS=Homo sapiens OX=9606 GN=RRP12 PE=1 SV=2	AAQHGVC(BTD[C])SVLK|AAQHGVC(BTD[C])SVLK	3|2	2.03|2.915	0.37528|0.06364	2.4725	0.62579	5	2
O60678	417	O60678_417	PRMT3	ANM3_HUMAN Protein arginine N-methyltransferase 3 OS=Homo sapiens OX=9606 GN=PRMT3 PE=1 SV=4	TLISEPC(BTD[C])GIK|	1|	2.47|	NA|	2.47	NA	1	1
Q52LJ0	113	Q52LJ0_113	FAM98B	FA98B_HUMAN Protein FAM98B OS=Homo sapiens OX=9606 GN=FAM98B PE=1 SV=2	KEDC(BTD[C])LK|	1|	2.47|	NA|	2.47	NA	1	1
Q7L0Y3	123	Q7L0Y3_123	TRMT10C	TM10C_HUMAN tRNA methyltransferase 10 homolog C OS=Homo sapiens OX=9606 GN=TRMT10C PE=1 SV=2	TLMEC(BTD[C])VSNTAK|	1|	2.47|	NA|	2.47	NA	1	1
Q9Y512	237	Q9Y512_237	SAMM50	SAM50_HUMAN Sorting and assembly machinery component 50 homolog OS=Homo sapiens OX=9606 GN=SAMM50 PE=1 SV=3	|ELGC(BTD[C])LSR	|1	|2.47	|NA	2.47	NA	1	1
P17812	30	P17812_30	CTPS1	PYRG1_HUMAN CTP synthase 1 OS=Homo sapiens OX=9606 GN=CTPS1 PE=1 SV=2	SC(BTD[C])GLHVTSIK|SC(BTD[C])GLHVTSIK	2|2	2.72|2.215	0.0|0.26163	2.4675	0.35709	4	2
Q15393	1054	Q15393_1054	SF3B3	SF3B3_HUMAN Splicing factor 3B subunit 3 OS=Homo sapiens OX=9606 GN=SF3B3 PE=1 SV=4	|FGNIC(BTD[C])VVR	|1	|2.46	|NA	2.46	NA	1	1
Q15637	171	Q15637_171	SF1	SF01_HUMAN Splicing factor 1 OS=Homo sapiens OX=9606 GN=SF1 PE=1 SV=4	NIEKEC(BTD[C])NAK|NIEKEC(BTD[C])NAK	3|3	2.62|2.3	0.08083|0.13013	2.46	0.22627	6	2
Q9NNW7	500	Q9NNW7_500	TXNRD2	TRXR2_HUMAN Thioredoxin reductase 2, mitochondrial OS=Homo sapiens OX=9606 GN=TXNRD2 PE=1 SV=3	TVGIHPTC(BTD[C])SEEVVK|	1|	2.46|	NA|	2.46	NA	1	1
O95602	780	O95602_780	POLR1A	RPA1_HUMAN DNA-directed RNA polymerase I subunit RPA1 OS=Homo sapiens OX=9606 GN=POLR1A PE=1 SV=2	|VLTC(BTD[C])LAR	|1	|2.45	|NA	2.45	NA	1	1
Q8IZT6	1557	Q8IZT6_1557	ASPM	ASPM_HUMAN Abnormal spindle-like microcephaly-associated protein OS=Homo sapiens OX=9606 GN=ASPM PE=1 SV=2	AHNLC(BTD[C])R|	2|	2.45|	0.05657|	2.45	NA	2	1
O60841	853	O60841_853	EIF5B	IF2P_HUMAN Eukaryotic translation initiation factor 5B OS=Homo sapiens OX=9606 GN=EIF5B PE=1 SV=4	LAHC(BTD[C])EELR|LAHC(BTD[C])EELR	2|2	2.11|2.77	0.0|0.45255	2.44	0.46669	4	2
P42285	399	P42285_399	MTREX	MTREX_HUMAN Exosome RNA helicase MTR4 OS=Homo sapiens OX=9606 GN=MTREX PE=1 SV=3	KDC(BTD[C])EAYALQMTK|	1|	2.44|	NA|	2.44	NA	1	1
Q14919	54	Q14919_54	DRAP1	NC2A_HUMAN Dr1-associated corepressor OS=Homo sapiens OX=9606 GN=DRAP1 PE=1 SV=3	KAC(BTD[C])QVTQSR|KAC(BTD[C])QVTQSR	1|2	1.79|3.09	NA|0.0	2.44	0.91924	3	2
Q9Y305	299	Q9Y305_299	ACOT9	ACOT9_HUMAN Acyl-coenzyme A thioesterase 9, mitochondrial OS=Homo sapiens OX=9606 GN=ACOT9 PE=1 SV=2	SLEIC(BTD[C])HPQER|SLEIC(BTD[C])HPQER	1|1	1.9|2.97	NA|NA	2.435	0.7566	2	2
O75175	14	O75175_14	CNOT3	CNOT3_HUMAN CCR4-NOT transcription complex subunit 3 OS=Homo sapiens OX=9606 GN=CNOT3 PE=1 SV=1	LQGEIDRC(BTD[C])LK|	1|	2.43|	NA|	2.43	NA	1	1
P36542	103	P36542_103	ATP5F1C	ATPG_HUMAN ATP synthase subunit gamma, mitochondrial OS=Homo sapiens OX=9606 GN=ATP5F1C PE=1 SV=1	GLC(BTD[C])GAIHSSIAK|	2|	2.43|	0.0|	2.43	NA	2	1
Q6NXE6	471	Q6NXE6_471	ARMC6	ARMC6_HUMAN Armadillo repeat-containing protein 6 OS=Homo sapiens OX=9606 GN=ARMC6 PE=1 SV=2	SAHRDC(BTD[C])EDVAK|	1|	2.43|	NA|	2.43	NA	1	1
P30566	399	P30566_399	ADSL	PUR8_HUMAN Adenylosuccinate lyase OS=Homo sapiens OX=9606 GN=ADSL PE=1 SV=2	QDC(BTD[C])HEK|	1|	2.42|	NA|	2.42	NA	1	1
P53618	235	P53618_235	COPB1	COPB_HUMAN Coatomer subunit beta OS=Homo sapiens OX=9606 GN=COPB1 PE=1 SV=3	VC(BTD[C])HANPSER|VC(BTD[C])HANPSER	3|1	2.49|2.35	0.02309|NA	2.42	0.09899	4	2
Q13217	197	Q13217_197	DNAJC3	DNJC3_HUMAN DnaJ homolog subfamily C member 3 OS=Homo sapiens OX=9606 GN=DNAJC3 PE=1 SV=1	|AEC(BTD[C])FIK	|1	|2.42	|NA	2.42	NA	1	1
Q9NR56	53	Q9NR56_53	MBNL1	MBNL1_HUMAN Muscleblind-like protein 1 OS=Homo sapiens OX=9606 GN=MBNL1 PE=1 SV=2	|VIAC(BTD[C])FDSLK	|1	|2.42	|NA	2.42	NA	1	1
Q01518	427	Q01518_427	CAP1	CAP1_HUMAN Adenylyl cyclase-associated protein 1 OS=Homo sapiens OX=9606 GN=CAP1 PE=1 SV=5	NSLDC(BTD[C])EIVSAK|NSLDC(BTD[C])EIVSAK	1|1	2.38|2.45	NA|NA	2.415	0.0495	2	2
P12004	62	P12004_62	PCNA	PCNA_HUMAN Proliferating cell nuclear antigen OS=Homo sapiens OX=9606 GN=PCNA PE=1 SV=1	|SEGFDTYRC(BTD[C])DR	|2	|2.41	|0.0	2.41	NA	2	1
P30153	377	P30153_377	PPP2R1A	2AAA_HUMAN Serine/threonine-protein phosphatase 2A 65 kDa regulatory subunit A alpha isoform OS=Homo sapiens OX=9606 GN=PPP2R1A PE=1 SV=4	DEC(BTD[C])PEVR|	1|	2.41|	NA|	2.41	NA	1	1
P49848	431	P49848_431	TAF6	TAF6_HUMAN Transcription initiation factor TFIID subunit 6 OS=Homo sapiens OX=9606 GN=TAF6 PE=1 SV=1	HC(BTD[C])APVLAK|	1|	2.41|	NA|	2.41	NA	1	1
Q7Z6Z7	19	Q7Z6Z7_19	HUWE1	HUWE1_HUMAN E3 ubiquitin-protein ligase HUWE1 OS=Homo sapiens OX=9606 GN=HUWE1 PE=1 SV=3	TPTEAPADC(BTD[C])R|	2|	2.41|	0.04243|	2.41	NA	2	1
Q9UPN3	4906	Q9UPN3_4906	MACF1	MACF1_HUMAN Microtubule-actin cross-linking factor 1, isoforms 1/2/3/5 OS=Homo sapiens OX=9606 GN=MACF1 PE=1 SV=4	LKDC(BTD[C])MQK|	1|	2.41|	NA|	2.41	NA	1	1
Q9Y6A4	160	Q9Y6A4_160	CFAP20	CFA20_HUMAN Cilia- and flagella-associated protein 20 OS=Homo sapiens OX=9606 GN=CFAP20 PE=1 SV=1	VQIHANC(BTD[C])R|	1|	2.41|	NA|	2.41	NA	1	1
P26368	464	P26368_464	U2AF2	U2AF2_HUMAN Splicing factor U2AF 65 kDa subunit OS=Homo sapiens OX=9606 GN=U2AF2 PE=1 SV=4	YC(BTD[C])DPDSYHR|YC(BTD[C])DPDSYHR	3|3	2.36|2.45	0.0|0.0	2.405	0.06364	6	2
O96007	107	O96007_107	MOCS2	MOC2B_HUMAN Molybdopterin synthase catalytic subunit OS=Homo sapiens OX=9606 GN=MOCS2 PE=1 SV=1	|KIC(BTD[C])SDIR	|1	|2.4	|NA	2.4	NA	1	1
P26572	303	P26572_303	MGAT1	MGAT1_HUMAN Alpha-1,3-mannosyl-glycoprotein 2-beta-N-acetylglucosaminyltransferase OS=Homo sapiens OX=9606 GN=MGAT1 PE=1 SV=2	|AC(BTD[C])IRPEISR	|1	|2.4	|NA	2.4	NA	1	1
P84103	74	P84103_74	SRSF3	SRSF3_HUMAN Serine/arginine-rich splicing factor 3 OS=Homo sapiens OX=9606 GN=SRSF3 PE=1 SV=1	|TLCGC(BTD[C])R	|2	|2.4	|0.0	2.4	NA	2	1
Q7Z5K2	776	Q7Z5K2_776	WAPL	WAPL_HUMAN Wings apart-like protein homolog OS=Homo sapiens OX=9606 GN=WAPL PE=1 SV=1	RLC(BTD[C])ETVHNK|	1|	2.4|	NA|	2.4	NA	1	1
O00303	256	O00303_256	EIF3F	EIF3F_HUMAN Eukaryotic translation initiation factor 3 subunit F OS=Homo sapiens OX=9606 GN=EIF3F PE=1 SV=1	TC(BTD[C])FSPNR|	4|	2.39|	0.0|	2.39	NA	4	1
P62879	204	P62879_204	GNB2	GBB2_HUMAN Guanine nucleotide-binding protein G(I)/G(S)/G(T) subunit beta-2 OS=Homo sapiens OX=9606 GN=GNB2 PE=1 SV=3	TFVSGAC(BTD[C])DASIK|TFVSGAC(BTD[C])DASIK	2|1	2.51|2.27	0.0|NA	2.39	0.16971	3	2
Q96CW1	251	Q96CW1_251	AP2M1	AP2M1_HUMAN AP-2 complex subunit mu OS=Homo sapiens OX=9606 GN=AP2M1 PE=1 SV=2	FHQC(BTD[C])VR|	2|	2.39|	0.09899|	2.39	NA	2	1
P48643	377	P48643_377	CCT5	TCPE_HUMAN T-complex protein 1 subunit epsilon OS=Homo sapiens OX=9606 GN=CCT5 PE=1 SV=1	MLVIEQC(BTD[C])K|MLVIEQC(BTD[C])K	3|2	2.27|2.495	0.45033|0.0495	2.3825	0.1591	5	2
P13639	567	P13639_567	EEF2	EF2_HUMAN Elongation factor 2 OS=Homo sapiens OX=9606 GN=EEF2 PE=1 SV=4	DLEEDHAC(BTD[C])IPIKK DLEEDHAC(BTD[C])IPIK|	2|	2.38|	0.38184|	2.38	NA	2	1
P62633	57	P62633_57	CNBP	CNBP_HUMAN Cellular nucleic acid-binding protein OS=Homo sapiens OX=9606 GN=CNBP PE=1 SV=1	C(BTD[C])GESGHLAK|	1|	2.38|	NA|	2.38	NA	1	1
Q13423	308	Q13423_308	NNT	NNTM_HUMAN NAD(P) transhydrogenase, mitochondrial OS=Homo sapiens OX=9606 GN=NNT PE=1 SV=3	LFAQQC(BTD[C])K|LFAQQC(BTD[C])K	1|2	2.31|2.45	NA|0.0	2.38	0.09899	3	2
Q8WUM4	512	Q8WUM4_512	PDCD6IP	PDC6I_HUMAN Programmed cell death 6-interacting protein OS=Homo sapiens OX=9606 GN=PDCD6IP PE=1 SV=1	EC(BTD[C])YQSHR|	2|	2.38|	0.0|	2.38	NA	2	1
Q96CQ1	67	Q96CQ1_67	SLC25A36	S2536_HUMAN Solute carrier family 25 member 36 OS=Homo sapiens OX=9606 GN=SLC25A36 PE=1 SV=1	VVSPGPLHC(BTD[C])LK|	1|	2.38|	NA|	2.38	NA	1	1
P22102	168	P22102_168	GART	PUR2_HUMAN Trifunctional purine biosynthetic protein adenosine-3 OS=Homo sapiens OX=9606 GN=GART PE=1 SV=1	SKEEAC(BTD[C])K|SKEEAC(BTD[C])K	3|2	2.37|2.37	0.14434|0.01414	2.37	0	5	2
P48643	493	P48643_493	CCT5	TCPE_HUMAN T-complex protein 1 subunit epsilon OS=Homo sapiens OX=9606 GN=CCT5 PE=1 SV=1	EMNPALGIDC(BTD[C])LHK|EMNPALGIDC(BTD[C])LHK	2|2	1.82|2.91	0.70711|0.2687	2.365	0.77075	4	2
O15523	315	O15523_315	DDX3Y	DDX3Y_HUMAN ATP-dependent RNA helicase DDX3Y OS=Homo sapiens OX=9606 GN=DDX3Y PE=1 SV=2	GC(BTD[C])HLLVATPGR|	1|	2.36|	NA|	2.36	NA	1	1
P17655	640	P17655_640	CAPN2	CAN2_HUMAN Calpain-2 catalytic subunit OS=Homo sapiens OX=9606 GN=CAPN2 PE=1 SV=6	|MPC(BTD[C])QLHQVIVAR	|1	|2.36	|NA	2.36	NA	1	1
Q08211	469	Q08211_469	DHX9	DHX9_HUMAN ATP-dependent RNA helicase A OS=Homo sapiens OX=9606 GN=DHX9 PE=1 SV=4	|SC(BTD[C])GYSVR	|3	|2.36	|0.39678	2.36	NA	3	1
Q3MHD2	20	Q3MHD2_20	LSM12	LSM12_HUMAN Protein LSM12 homolog OS=Homo sapiens OX=9606 GN=LSM12 PE=1 SV=2	TC(BTD[C])QEQR|	2|	2.36|	0.0|	2.36	NA	2	1
Q9NR30	445	Q9NR30_445	DDX21	DDX21_HUMAN Nucleolar RNA helicase 2 OS=Homo sapiens OX=9606 GN=DDX21 PE=1 SV=5	|TIIFC(BTD[C])ETKK TIIFC(BTD[C])ETK	|2	|2.36	|0.01414	2.36	NA	2	1
Q9Y4P3	148	Q9Y4P3_148	TBL2	TBL2_HUMAN Transducin beta-like protein 2 OS=Homo sapiens OX=9606 GN=TBL2 PE=1 SV=1	FSPDC(BTD[C])R|	2|	2.36|	0.0|	2.36	NA	2	1
P40926	212	P40926_212	MDH2	MDHM_HUMAN Malate dehydrogenase, mitochondrial OS=Homo sapiens OX=9606 GN=MDH2 PE=1 SV=3	|TIIPLISQC(BTD[C])TPK	|2	|2.355	|0.40305	2.355	NA	2	1
Q9H3U1	503	Q9H3U1_503	UNC45A	UN45A_HUMAN Protein unc-45 homolog A OS=Homo sapiens OX=9606 GN=UNC45A PE=1 SV=1	|ALVGLC(BTD[C])K	|2	|2.355	|0.07778	2.355	NA	2	1
O14893	241	O14893_241	GEMIN2	GEMI2_HUMAN Gem-associated protein 2 OS=Homo sapiens OX=9606 GN=GEMIN2 PE=1 SV=1	RC(BTD[C])SEVR|	1|	2.35|	NA|	2.35	NA	1	1
O14980	119	O14980_119	XPO1	XPO1_HUMAN Exportin-1 OS=Homo sapiens OX=9606 GN=XPO1 PE=1 SV=1	TSSDPTC(BTD[C])VEK|	1|	2.35|	NA|	2.35	NA	1	1
P49721	91	P49721_91	PSMB2	PSB2_HUMAN Proteasome subunit beta type-2 OS=Homo sapiens OX=9606 GN=PSMB2 PE=1 SV=1	|NLADC(BTD[C])LR	|3	|2.35	|0.0	2.35	NA	3	1
Q15291	126	Q15291_126	RBBP5	RBBP5_HUMAN Retinoblastoma-binding protein 5 OS=Homo sapiens OX=9606 GN=RBBP5 PE=1 SV=2	VLVC(BTD[C])PMK|	1|	2.35|	NA|	2.35	NA	1	1
P05556	691	P05556_691	ITGB1	ITB1_HUMAN Integrin beta-1 OS=Homo sapiens OX=9606 GN=ITGB1 PE=1 SV=2	DKLPQPVQPDPVSHC(BTD[C])K|DKLPQPVQPDPVSHC(BTD[C])K	3|2	2.45|2.24	0.1044|0.62225	2.345	0.14849	5	2
P40227	282	P40227_282	CCT6A	TCPZ_HUMAN T-complex protein 1 subunit zeta OS=Homo sapiens OX=9606 GN=CCT6A PE=1 SV=3	RKVC(BTD[C])GDSDK KVC(BTD[C])GDSDK|KVC(BTD[C])GDSDK	4|3	2.32|2.37	0.27785|0.0	2.345	0.03536	7	2
Q16630	466	Q16630_466	CPSF6	CPSF6_HUMAN Cleavage and polyadenylation specificity factor subunit 6 OS=Homo sapiens OX=9606 GN=CPSF6 PE=1 SV=2	VSADDRC(BTD[C])K|VSADDRC(BTD[C])K	3|5	2.48|2.21	0.13279|0.08792	2.345	0.19092	8	2
Q13098	341	Q13098_341	GPS1	CSN1_HUMAN COP9 signalosome complex subunit 1 OS=Homo sapiens OX=9606 GN=GPS1 PE=1 SV=4	YASC(BTD[C])LK|	2|	2.34|	0.0|	2.34	NA	2	1
Q14315	1991	Q14315_1991	FLNC	FLNC_HUMAN Filamin-C OS=Homo sapiens OX=9606 GN=FLNC PE=1 SV=3	|APSGNEEPC(BTD[C])LLK	|2	|2.34	|0.0	2.34	NA	2	1
Q92499	638	Q92499_638	DDX1	DDX1_HUMAN ATP-dependent RNA helicase DDX1 OS=Homo sapiens OX=9606 GN=DDX1 PE=1 SV=2	GC(BTD[C])YNTR|	1|	2.34|	NA|	2.34	NA	1	1
P00491	78	P00491_78	PNP	PNPH_HUMAN Purine nucleoside phosphorylase OS=Homo sapiens OX=9606 GN=PNP PE=1 SV=2	AC(BTD[C])VMMQGR|AC(BTD[C])VMMQGR	2|4	2.285|2.39	0.55861|0.62777	2.3375	0.07425	6	2
P78527	1364	P78527_1364	PRKDC	PRKDC_HUMAN DNA-dependent protein kinase catalytic subunit OS=Homo sapiens OX=9606 GN=PRKDC PE=1 SV=3	DLC(BTD[C])NTHLMR|DLC(BTD[C])NTHLMR	1|3	2.95|1.72	NA|0.59808	2.335	0.86974	4	2
P05023	663	P05023_663	ATP1A1	AT1A1_HUMAN Sodium/potassium-transporting ATPase subunit alpha-1 OS=Homo sapiens OX=9606 GN=ATP1A1 PE=1 SV=1	AC(BTD[C])VVHGSDLK|AC(BTD[C])VVHGSDLK	3|3	2.28|2.38	0.04041|0.12423	2.33	0.07071	6	2
P13796	460	P13796_460	LCP1	PLSL_HUMAN Plastin-2 OS=Homo sapiens OX=9606 GN=LCP1 PE=1 SV=6	KIENC(BTD[C])NYAVELGK|KIENC(BTD[C])NYAVELGK	1|4	2.34|2.32	NA|0.33974	2.33	0.01414	5	2
P09525	198	P09525_198	ANXA4	ANXA4_HUMAN Annexin A4 OS=Homo sapiens OX=9606 GN=ANXA4 PE=1 SV=4	|FLTVLC(BTD[C])SR	|1	|2.32	|NA	2.32	NA	1	1
Q14315	2660	Q14315_2660	FLNC	FLNC_HUMAN Filamin-C OS=Homo sapiens OX=9606 GN=FLNC PE=1 SV=3	NSFTVDC(BTD[C])SK|	2|	2.32|	0.0|	2.32	NA	2	1
Q14315	1348	Q14315_1348	FLNC	FLNC_HUMAN Filamin-C OS=Homo sapiens OX=9606 GN=FLNC PE=1 SV=3	|VGVTEGC(BTD[C])DPTR	|1	|2.32	|NA	2.32	NA	1	1
Q9NXH9	482	Q9NXH9_482	TRMT1	TRM1_HUMAN tRNA (guanine(26)-N(2))-dimethyltransferase OS=Homo sapiens OX=9606 GN=TRMT1 PE=1 SV=1	VSLSHAC(BTD[C])K|	1|	2.32|	NA|	2.32	NA	1	1
P49792	188	P49792_188	RANBP2	RBP2_HUMAN E3 SUMO-protein ligase RanBP2 OS=Homo sapiens OX=9606 GN=RANBP2 PE=1 SV=2	DAVAHC(BTD[C])HEAER|DAVAHC(BTD[C])HEAER	2|1	2.005|2.62	0.3182|NA	2.3125	0.43487	3	2
P17987	397	P17987_397	TCP1	TCPA_HUMAN T-complex protein 1 subunit alpha OS=Homo sapiens OX=9606 GN=TCP1 PE=1 SV=1	|SLHDALC(BTD[C])VVK	|1	|2.31	|NA	2.31	NA	1	1
Q15020	486	Q15020_486	SART3	SART3_HUMAN Squamous cell carcinoma antigen recognized by T-cells 3 OS=Homo sapiens OX=9606 GN=SART3 PE=1 SV=1	|LC(BTD[C])NNMQK	|3	|2.31	|0.15308	2.31	NA	3	1
Q92945	176	Q92945_176	KHSRP	FUBP2_HUMAN Far upstream element-binding protein 2 OS=Homo sapiens OX=9606 GN=KHSRP PE=1 SV=4	IQQDSGC(BTD[C])K|IQQDSGC(BTD[C])K	3|5	2.37|2.25	0.00577|0.0	2.31	0.08485	8	2
P14618	49	P14618_49	PKM	KPYM_HUMAN Pyruvate kinase PKM OS=Homo sapiens OX=9606 GN=PKM PE=1 SV=4	|NTGIIC(BTD[C])TIGPASR	|3	|2.3	|0.05774	2.3	NA	3	1
Q01082	604	Q01082_604	SPTBN1	SPTB2_HUMAN Spectrin beta chain, non-erythrocytic 1 OS=Homo sapiens OX=9606 GN=SPTBN1 PE=1 SV=2	|FATDGEGYKPC(BTD[C])DPQVIR	|1	|2.3	|NA	2.3	NA	1	1
Q9BQA1	172	Q9BQA1_172	WDR77	MEP50_HUMAN Methylosome protein 50 OS=Homo sapiens OX=9606 GN=WDR77 PE=1 SV=1	AHAAQVTC(BTD[C])VAASPHK|	1|	2.3|	NA|	2.3	NA	1	1
P00505	295	P00505_295	GOT2	AATM_HUMAN Aspartate aminotransferase, mitochondrial OS=Homo sapiens OX=9606 GN=GOT2 PE=1 SV=3	|VGAFTMVC(BTD[C])K	|2	|2.29	|2.31931	2.29	NA	2	1
P51610	326	P51610_326	HCFC1	HCFC1_HUMAN Host cell factor 1 OS=Homo sapiens OX=9606 GN=HCFC1 PE=1 SV=2	|AGHC(BTD[C])AVAINTR	|1	|2.29	|NA	2.29	NA	1	1
Q15029	256	Q15029_256	EFTUD2	U5S1_HUMAN 116 kDa U5 small nuclear ribonucleoprotein component OS=Homo sapiens OX=9606 GN=EFTUD2 PE=1 SV=1	|LAVTVC(BTD[C])INK	|1	|2.29	|NA	2.29	NA	1	1
Q96CV9	555	Q96CV9_555	OPTN	OPTN_HUMAN Optineurin OS=Homo sapiens OX=9606 GN=OPTN PE=1 SV=3	NIPIHSC(BTD[C])PK|	1|	2.29|	NA|	2.29	NA	1	1
O00232	74	O00232_74	PSMD12	PSD12_HUMAN 26S proteasome non-ATPase regulatory subunit 12 OS=Homo sapiens OX=9606 GN=PSMD12 PE=1 SV=3	MC(BTD[C])YEAK|MC(BTD[C])YEAK	2|1	2.715|1.85	0.20506|NA	2.2825	0.61165	3	2
Q14315	2552	Q14315_2552	FLNC	FLNC_HUMAN Filamin-C OS=Homo sapiens OX=9606 GN=FLNC PE=1 SV=3	VQLDC(BTD[C])R|VQLDC(BTD[C])R	1|1	2.56|2.0	NA|NA	2.28	0.39598	2	2
Q6NVY1	336	Q6NVY1_336	HIBCH	HIBCH_HUMAN 3-hydroxyisobutyryl-CoA hydrolase, mitochondrial OS=Homo sapiens OX=9606 GN=HIBCH PE=1 SV=2	LSQAC(BTD[C])MR|LSQAC(BTD[C])MR	2|1	2.42|2.14	0.0|NA	2.28	0.19799	3	2
Q9P2T1	316	Q9P2T1_316	GMPR2	GMPR2_HUMAN GMP reductase 2 OS=Homo sapiens OX=9606 GN=GMPR2 PE=1 SV=1	|STC(BTD[C])TYVGAAK	|1	|2.28	|NA	2.28	NA	1	1
Q9Y490	2442	Q9Y490_2442	TLN1	TLN1_HUMAN Talin-1 OS=Homo sapiens OX=9606 GN=TLN1 PE=1 SV=3	|QVAASTAQLLVAC(BTD[C])K	|1	|2.28	|NA	2.28	NA	1	1
O00410	1057	O00410_1057	IPO5	IPO5_HUMAN Importin-5 OS=Homo sapiens OX=9606 GN=IPO5 PE=1 SV=4	HEDPC(BTD[C])AK|	4|	2.275|	0.1097|	2.275	NA	4	1
P60174	255	P60174_255	TPI1	TPIS_HUMAN Triosephosphate isomerase OS=Homo sapiens OX=9606 GN=TPI1 PE=1 SV=3	IIYGGSVTGATC(BTD[C])K|IIYGGSVTGATC(BTD[C])K	1|4	2.36|2.19	NA|0.0	2.275	0.12021	5	2
Q9H6R4	486	Q9H6R4_486	NOL6	NOL6_HUMAN Nucleolar protein 6 OS=Homo sapiens OX=9606 GN=NOL6 PE=1 SV=2	LQAAC(BTD[C])HR|LQAAC(BTD[C])HR	4|2	2.555|1.99	0.32674|0.46669	2.2725	0.39952	6	2
P16152	150	P16152_150	CBR1	CBR1_HUMAN Carbonyl reductase [NADPH] 1 OS=Homo sapiens OX=9606 GN=CBR1 PE=1 SV=3	SC(BTD[C])SPELQQK|SC(BTD[C])SPELQQK	1|1	1.99|2.55	NA|NA	2.27	0.39598	2	2
P23919	31	P23919_31	DTYMK	KTHY_HUMAN Thymidylate kinase OS=Homo sapiens OX=9606 GN=DTYMK PE=1 SV=4	LVEALC(BTD[C])AAGHR|	1|	2.27|	NA|	2.27	NA	1	1
P48643	253	P48643_253	CCT5	TCPE_HUMAN T-complex protein 1 subunit epsilon OS=Homo sapiens OX=9606 GN=CCT5 PE=1 SV=1	|IAILTC(BTD[C])PFEPPKPK	|1	|2.27	|NA	2.27	NA	1	1
P62701	181	P62701_181	RPS4X	RS4X_HUMAN 40S ribosomal protein S4, X isoform OS=Homo sapiens OX=9606 GN=RPS4X PE=1 SV=2	|FDTGNLC(BTD[C])MVTGGANLGR	|2	|2.27	|0.0	2.27	NA	2	1
Q00341	566	Q00341_566	HDLBP	VIGLN_HUMAN Vigilin OS=Homo sapiens OX=9606 GN=HDLBP PE=1 SV=2	NEVEKC(BTD[C])TK|NEVEKC(BTD[C])TK	1|3	2.43|2.11	NA|0.03464	2.27	0.22627	4	2
Q01082	112	Q01082_112	SPTBN1	SPTB2_HUMAN Spectrin beta chain, non-erythrocytic 1 OS=Homo sapiens OX=9606 GN=SPTBN1 PE=1 SV=2	|IHC(BTD[C])LENVDK	|5	|2.27	|0.16888	2.27	NA	5	1
Q13283	73	Q13283_73	G3BP1	G3BP1_HUMAN Ras GTPase-activating protein-binding protein 1 OS=Homo sapiens OX=9606 GN=G3BP1 PE=1 SV=1	VMSQNFTNC(BTD[C])HTK|VMSQNFTNC(BTD[C])HTK	4|5	2.3|2.24	0.20567|0.23707	2.27	0.04243	9	2
Q13617	266	Q13617_266	CUL2	CUL2_HUMAN Cullin-2 OS=Homo sapiens OX=9606 GN=CUL2 PE=1 SV=2	VIHEC(BTD[C])QQR|VIHEC(BTD[C])QQR	1|4	2.28|2.26	NA|0.14221	2.27	0.01414	5	2
Q7L5N1	299	Q7L5N1_299	COPS6	CSN6_HUMAN COP9 signalosome complex subunit 6 OS=Homo sapiens OX=9606 GN=COPS6 PE=1 SV=1	TC(BTD[C])NTMNQFVNK|	1|	2.27|	NA|	2.27	NA	1	1
O75369	1952	O75369_1952	FLNB	FLNB_HUMAN Filamin-B OS=Homo sapiens OX=9606 GN=FLNB PE=1 SV=2	|DEPC(BTD[C])LLK	|1	|2.26	|NA	2.26	NA	1	1
P17655	82	P17655_82	CAPN2	CAN2_HUMAN Calpain-2 catalytic subunit OS=Homo sapiens OX=9606 GN=CAPN2 PE=1 SV=6	|RPTEIC(BTD[C])ADPQFIIGGATR	|1	|2.26	|NA	2.26	NA	1	1
P42704	113	P42704_113	LRPPRC	LPPRC_HUMAN Leucine-rich PPR motif-containing protein, mitochondrial OS=Homo sapiens OX=9606 GN=LRPPRC PE=1 SV=3	VFNDTC(BTD[C])R|VFNDTC(BTD[C])R	2|4	2.11|2.41	0.79196|0.01	2.26	0.21213	6	2
Q96N67	1561	Q96N67_1561	DOCK7	DOCK7_HUMAN Dedicator of cytokinesis protein 7 OS=Homo sapiens OX=9606 GN=DOCK7 PE=1 SV=4	HC(BTD[C])SSSIGTIR|	1|	2.26|	NA|	2.26	NA	1	1
Q9HC38	197	Q9HC38_197	GLOD4	GLOD4_HUMAN Glyoxalase domain-containing protein 4 OS=Homo sapiens OX=9606 GN=GLOD4 PE=1 SV=1	ALLGYADNQC(BTD[C])K|	1|	2.26|	NA|	2.26	NA	1	1
Q9Y3I0	255	Q9Y3I0_255	RTCB	RTCB_HUMAN tRNA-splicing ligase RtcB homolog OS=Homo sapiens OX=9606 GN=RTCB PE=1 SV=1	GQVC(BTD[C])VMIHSGSR|	1|	2.26|	NA|	2.26	NA	1	1
Q9Y5X3	227	Q9Y5X3_227	SNX5	SNX5_HUMAN Sorting nexin-5 OS=Homo sapiens OX=9606 GN=SNX5 PE=1 SV=1	IKDSC(BTD[C])VK|IKDSC(BTD[C])VK	1|2	2.34|2.17	NA|0.0	2.255	0.12021	3	2
Q00610	870	Q00610_870	CLTC	CLH1_HUMAN Clathrin heavy chain 1 OS=Homo sapiens OX=9606 GN=CLTC PE=1 SV=5	IHEGC(BTD[C])EEPATHNALAK|IHEGC(BTD[C])EEPATHNALAK	6|2	2.275|2.23	0.08959|0.04243	2.2525	0.03182	8	2
P00352	370	P00352_370	ALDH1A1	AL1A1_HUMAN Retinal dehydrogenase 1 OS=Homo sapiens OX=9606 GN=ALDH1A1 PE=1 SV=2	LEC(BTD[C])GGGPWGNK|LEC(BTD[C])GGGPWGNK	2|2	2.48|2.02	0.0|0.0	2.25	0.32527	4	2
P40925	154	P40925_154	MDH1	MDHC_HUMAN Malate dehydrogenase, cytoplasmic OS=Homo sapiens OX=9606 GN=MDH1 PE=1 SV=4	|ENFSC(BTD[C])LTR	|4	|2.25	|0.355	2.25	NA	4	1
Q13454	123	Q13454_123	TUSC3	TUSC3_HUMAN Tumor suppressor candidate 3 OS=Homo sapiens OX=9606 GN=TUSC3 PE=1 SV=1	YSSAFC(BTD[C])NK|YSSAFC(BTD[C])NK	1|1	2.18|2.32	NA|NA	2.25	0.09899	2	2
Q92643	280	Q92643_280	PIGK	GPI8_HUMAN GPI-anchor transamidase OS=Homo sapiens OX=9606 GN=PIGK PE=1 SV=2	SLC(BTD[C])VSTPGHR|	1|	2.25|	NA|	2.25	NA	1	1
Q99873	119	Q99873_119	PRMT1	ANM1_HUMAN Protein arginine N-methyltransferase 1 OS=Homo sapiens OX=9606 GN=PRMT1 PE=1 SV=3	|VIGIEC(BTD[C])SSISDYAVK	|1	|2.25	|NA	2.25	NA	1	1
Q9Y6M1	255	Q9Y6M1_255	IGF2BP2	IF2B2_HUMAN Insulin-like growth factor 2 mRNA-binding protein 2 OS=Homo sapiens OX=9606 GN=IGF2BP2 PE=1 SV=2	ENSGAAEKPVTIHATPEGTSEAC(BTD[C])R|	2|	2.25|	0.24042|	2.25	NA	2	1
P78527	1742	P78527_1742	PRKDC	PRKDC_HUMAN DNA-dependent protein kinase catalytic subunit OS=Homo sapiens OX=9606 GN=PRKDC PE=1 SV=3	FNNYVDC(BTD[C])MK|FNNYVDC(BTD[C])MK	1|1	2.4|2.09	NA|NA	2.245	0.2192	2	2
Q9C0C9	341	Q9C0C9_341	UBE2O	UBE2O_HUMAN (E3-independent) E2 ubiquitin-conjugating enzyme OS=Homo sapiens OX=9606 GN=UBE2O PE=1 SV=3	LGC(BTD[C])FDHAQR|LGC(BTD[C])FDHAQR	1|2	2.31|2.175	NA|0.40305	2.2425	0.09546	3	2
P38646	608	P38646_608	HSPA9	GRP75_HUMAN Stress-70 protein, mitochondrial OS=Homo sapiens OX=9606 GN=HSPA9 PE=1 SV=2	DQLPADEC(BTD[C])NKLK MEEFKDQLPADEC(BTD[C])NK|MEEFKDQLPADEC(BTD[C])NKLK MEEFKDQLPADEC(BTD[C])NK DQLPADEC(BTD[C])NK	3|3	2.25|2.23	1.01106|0.28618	2.24	0.01414	6	2
Q99943	229	Q99943_229	AGPAT1	PLCA_HUMAN 1-acyl-sn-glycerol-3-phosphate acyltransferase alpha OS=Homo sapiens OX=9606 GN=AGPAT1 PE=1 SV=2	FTSGQC(BTD[C])QVR|	1|	2.24|	NA|	2.24	NA	1	1
Q9Y3E7	60	Q9Y3E7_60	CHMP3	CHMP3_HUMAN Charged multivesicular body protein 3 OS=Homo sapiens OX=9606 GN=CHMP3 PE=1 SV=3	|DVC(BTD[C])IVLAK	|1	|2.24	|NA	2.24	NA	1	1
Q2TAY7	219	Q2TAY7_219	SMU1	SMU1_HUMAN WD40 repeat-containing protein SMU1 OS=Homo sapiens OX=9606 GN=SMU1 PE=1 SV=2	SHVEC(BTD[C])AR|SHVEC(BTD[C])AR	2|2	2.29|2.185	0.0|0.12021	2.2375	0.07425	4	2
P45880	47	P45880_47	VDAC2	VDAC2_HUMAN Voltage-dependent anion-selective channel protein 2 OS=Homo sapiens OX=9606 GN=VDAC2 PE=1 SV=2	SC(BTD[C])SGVEFSTSGSSNTDTGK|	1|	2.23|	NA|	2.23	NA	1	1
Q9Y316	244	Q9Y316_244	MEMO1	MEMO1_HUMAN Protein MEMO1 OS=Homo sapiens OX=9606 GN=MEMO1 PE=1 SV=1	YHNTIC(BTD[C])GR|	1|	2.23|	NA|	2.23	NA	1	1
P63241	73	P63241_73	EIF5A	IF5A1_HUMAN Eukaryotic translation initiation factor 5A-1 OS=Homo sapiens OX=9606 GN=EIF5A PE=1 SV=2	YEDIC(BTD[C])PSTHNMDVPNIK|YEDIC(BTD[C])PSTHNMDVPNIK	1|2	2.21|2.24	NA|0.04243	2.225	0.02121	3	2
Q8IY67	297	Q8IY67_297	RAVER1	RAVR1_HUMAN Ribonucleoprotein PTB-binding 1 OS=Homo sapiens OX=9606 GN=RAVER1 PE=1 SV=1	VSFC(BTD[C])APGPPGR|VSFC(BTD[C])APGPPGR	1|1	2.33|2.12	NA|NA	2.225	0.14849	2	2
Q9GZL7	185	Q9GZL7_185	WDR12	WDR12_HUMAN Ribosome biogenesis protein WDR12 OS=Homo sapiens OX=9606 GN=WDR12 PE=1 SV=2	ALHCC(BTD[C])R|	2|	2.225|	0.02121|	2.225	NA	2	1
O60232	187	O60232_187	ZNRD2	ZNRD2_HUMAN Protein ZNRD2 OS=Homo sapiens OX=9606 GN=ZNRD2 PE=1 SV=1	AC(BTD[C])AEALR|	1|	2.22|	NA|	2.22	NA	1	1
P12955	158	P12955_158	PEPD	PEPD_HUMAN Xaa-Pro dipeptidase OS=Homo sapiens OX=9606 GN=PEPD PE=1 SV=3	GVNTDSGSVC(BTD[C])R|	1|	2.22|	NA|	2.22	NA	1	1
P23229	131	P23229_131	ITGA6	ITA6_HUMAN Integrin alpha-6 OS=Homo sapiens OX=9606 GN=ITGA6 PE=1 SV=5	VVTC(BTD[C])AHR|VVTC(BTD[C])AHR	1|1	2.6|1.84	NA|NA	2.22	0.5374	2	2
Q86W42	324	Q86W42_324	THOC6	THOC6_HUMAN THO complex subunit 6 homolog OS=Homo sapiens OX=9606 GN=THOC6 PE=1 SV=1	|VLTAAGNSC(BTD[C])R	|1	|2.22	|NA	2.22	NA	1	1
Q14152	198	Q14152_198	EIF3A	EIF3A_HUMAN Eukaryotic translation initiation factor 3 subunit A OS=Homo sapiens OX=9606 GN=EIF3A PE=1 SV=1	KLC(BTD[C])DNLR|KLC(BTD[C])DNLR	2|1	2.16|2.27	0.0|NA	2.215	0.07778	3	2
P52294	298	P52294_298	KPNA1	IMA5_HUMAN Importin subunit alpha-5 OS=Homo sapiens OX=9606 GN=KPNA1 PE=1 SV=3	IQAVIDAGVC(BTD[C])R|	1|	2.21|	NA|	2.21	NA	1	1
Q2M389	936	Q2M389_936	WASHC4	WASC4_HUMAN WASH complex subunit 4 OS=Homo sapiens OX=9606 GN=WASHC4 PE=1 SV=2	SGGLHC(BTD[C])SSNAIR|	1|	2.21|	NA|	2.21	NA	1	1
Q6NUK1	330	Q6NUK1_330	SLC25A24	SCMC1_HUMAN Calcium-binding mitochondrial carrier protein SCaMC-1 OS=Homo sapiens OX=9606 GN=SLC25A24 PE=1 SV=2	|TGQYSGIYDC(BTD[C])AK	|1	|2.21	|NA	2.21	NA	1	1
Q92747	70	Q92747_70	ARPC1A	ARC1A_HUMAN Actin-related protein 2/3 complex subunit 1A OS=Homo sapiens OX=9606 GN=ARPC1A PE=2 SV=2	IVTC(BTD[C])GADR|	1|	2.21|	NA|	2.21	NA	1	1
P23528	39	P23528_39	CFL1	COF1_HUMAN Cofilin-1 OS=Homo sapiens OX=9606 GN=CFL1 PE=1 SV=3	|AVLFC(BTD[C])LSEDKK	|2	|2.205	|0.12021	2.205	NA	2	1
Q9UI26	262	Q9UI26_262	IPO11	IPO11_HUMAN Importin-11 OS=Homo sapiens OX=9606 GN=IPO11 PE=1 SV=1	|SIGTDNVC(BTD[C])R	|1	|2.2	|NA	2.2	NA	1	1
O75533	1035	O75533_1035	SF3B1	SF3B1_HUMAN Splicing factor 3B subunit 1 OS=Homo sapiens OX=9606 GN=SF3B1 PE=1 SV=3	|VQENC(BTD[C])IDLVGR	|1	|2.19	|NA	2.19	NA	1	1
P21589	476	P21589_476	NT5E	5NTD_HUMAN 5'-nucleotidase OS=Homo sapiens OX=9606 GN=NT5E PE=1 SV=1	|LDVLC(BTD[C])TK	|1	|2.19	|NA	2.19	NA	1	1
Q15392	252	Q15392_252	DHCR24	DHC24_HUMAN Delta(24)-sterol reductase OS=Homo sapiens OX=9606 GN=DHCR24 PE=1 SV=2	GLEAIC(BTD[C])AK|GLEAIC(BTD[C])AK	1|1	2.4|1.98	NA|NA	2.19	0.29698	2	2
Q5T9L3	162	Q5T9L3_162	WLS	WLS_HUMAN Protein wntless homolog OS=Homo sapiens OX=9606 GN=WLS PE=1 SV=2	LKC(BTD[C])TFTSPK|	1|	2.19|	NA|	2.19	NA	1	1
Q9P2J5	1093	Q9P2J5_1093	LARS	SYLC_HUMAN Leucine--tRNA ligase, cytoplasmic OS=Homo sapiens OX=9606 GN=LARS PE=1 SV=2	QGDNC(BTD[C])DSIIR|	1|	2.19|	NA|	2.19	NA	1	1
Q9UDY2	615	Q9UDY2_615	TJP2	ZO2_HUMAN Tight junction protein ZO-2 OS=Homo sapiens OX=9606 GN=TJP2 PE=1 SV=2	SHFEC(BTD[C])EK|	2|	2.19|	0.0|	2.19	NA	2	1
Q9Y6K0	30	Q9Y6K0_30	CEPT1	CEPT1_HUMAN Choline/ethanolaminephosphotransferase 1 OS=Homo sapiens OX=9606 GN=CEPT1 PE=1 SV=1	|MSTTGC(BTD[C])VLNK	|1	|2.19	|NA	2.19	NA	1	1
O95671	4	O95671_4	ASMTL	ASML_HUMAN Probable bifunctional dTTP/UTP pyrophosphatase/methyltransferase protein OS=Homo sapiens OX=9606 GN=ASMTL PE=1 SV=3	|VLC(BTD[C])PVIGK	|1	|2.18	|NA	2.18	NA	1	1
Q9Y490	2196	Q9Y490_2196	TLN1	TLN1_HUMAN Talin-1 OS=Homo sapiens OX=9606 GN=TLN1 PE=1 SV=3	AVAAGNSC(BTD[C])R|AVAAGNSC(BTD[C])R	3|5	2.3|2.06	0.11846|0.09737	2.18	0.16971	8	2
Q92621	1275	Q92621_1275	NUP205	NU205_HUMAN Nuclear pore complex protein Nup205 OS=Homo sapiens OX=9606 GN=NUP205 PE=1 SV=3	|LLQC(BTD[C])LHAK	|2	|2.175	|0.00707	2.175	NA	2	1
O75369	1617	O75369_1617	FLNB	FLNB_HUMAN Filamin-B OS=Homo sapiens OX=9606 GN=FLNB PE=1 SV=2	|ATQTGDASKC(BTD[C])LATGPGIASTVK	|1	|2.17	|NA	2.17	NA	1	1
P52701	1075	P52701_1075	MSH6	MSH6_HUMAN DNA mismatch repair protein Msh6 OS=Homo sapiens OX=9606 GN=MSH6 PE=1 SV=2	GGDGPMC(BTD[C])R|	1|	2.17|	NA|	2.17	NA	1	1
Q15813	371	Q15813_371	TBCE	TBCE_HUMAN Tubulin-specific chaperone E OS=Homo sapiens OX=9606 GN=TBCE PE=1 SV=1	TLNKC(BTD[C])EILPEER|	1|	2.17|	NA|	2.17	NA	1	1
O00410	110	O00410_110	IPO5	IPO5_HUMAN Importin-5 OS=Homo sapiens OX=9606 GN=IPO5 PE=1 SV=4	|KVC(BTD[C])DIAAELAR VC(BTD[C])DIAAELAR	|4	|2.16	|0.10874	2.16	NA	4	1
Q99470	80	Q99470_80	SDF2	SDF2_HUMAN Stromal cell-derived factor 2 OS=Homo sapiens OX=9606 GN=SDF2 PE=1 SV=2	|SATVC(BTD[C])ER	|1	|2.16	|NA	2.16	NA	1	1
Q9BYT8	153	Q9BYT8_153	NLN	NEUL_HUMAN Neurolysin, mitochondrial OS=Homo sapiens OX=9606 GN=NLN PE=1 SV=1	IVHLQETC(BTD[C])DLGK|	1|	2.16|	NA|	2.16	NA	1	1
P21333	2160	P21333_2160	FLNA	FLNA_HUMAN Filamin-A OS=Homo sapiens OX=9606 GN=FLNA PE=1 SV=4	APSVANVGSHC(BTD[C])DLSLK|APSVANVGSHC(BTD[C])DLSLK	1|3	2.0|2.31	NA|0.02309	2.155	0.2192	4	2
Q6IBS0	275	Q6IBS0_275	TWF2	TWF2_HUMAN Twinfilin-2 OS=Homo sapiens OX=9606 GN=TWF2 PE=1 SV=2	|MLYSSC(BTD[C])K	|2	|2.155	|0.47376	2.155	NA	2	1
P00390	467	P00390_467	GSR	GSHR_HUMAN Glutathione reductase, mitochondrial OS=Homo sapiens OX=9606 GN=GSR PE=1 SV=2	MVC(BTD[C])ANKEEK|	1|	2.15|	NA|	2.15	NA	1	1
P09211	15	P09211_15	GSTP1	GSTP1_HUMAN Glutathione S-transferase P OS=Homo sapiens OX=9606 GN=GSTP1 PE=1 SV=2	GRC(BTD[C])AALR|GRC(BTD[C])AALR	4|1	2.2|2.1	0.02062|NA	2.15	0.07071	5	2
P31040	536	P31040_536	SDHA	SDHA_HUMAN Succinate dehydrogenase [ubiquinone] flavoprotein subunit, mitochondrial OS=Homo sapiens OX=9606 GN=SDHA PE=1 SV=2	VGSVLQEGC(BTD[C])GK|	1|	2.15|	NA|	2.15	NA	1	1
P48444	479	P48444_479	ARCN1	COPD_HUMAN Coatomer subunit delta OS=Homo sapiens OX=9606 GN=ARCN1 PE=1 SV=1	NYC(BTD[C])NIQVTK|	1|	2.15|	NA|	2.15	NA	1	1
Q6NSJ5	493	Q6NSJ5_493	LRRC8E	LRC8E_HUMAN Volume-regulated anion channel subunit LRRC8E OS=Homo sapiens OX=9606 GN=LRRC8E PE=1 SV=2	|VKC(BTD[C])EELR	|1	|2.15	|NA	2.15	NA	1	1
Q92979	171	Q92979_171	EMG1	NEP1_HUMAN Ribosomal RNA small subunit methyltransferase NEP1 OS=Homo sapiens OX=9606 GN=EMG1 PE=1 SV=4	NPVSDHFPVGC(BTD[C])MK|NPVSDHFPVGC(BTD[C])MK	1|1	1.92|2.38	NA|NA	2.15	0.32527	2	2
Q9BQG0	942	Q9BQG0_942	MYBBP1A	MBB1A_HUMAN Myb-binding protein 1A OS=Homo sapiens OX=9606 GN=MYBBP1A PE=1 SV=2	GNTAEGC(BTD[C])VHETQEK|	1|	2.15|	NA|	2.15	NA	1	1
P09874	256	P09874_256	PARP1	PARP1_HUMAN Poly [ADP-ribose] polymerase 1 OS=Homo sapiens OX=9606 GN=PARP1 PE=1 SV=4	KVC(BTD[C])STNDLK|KVC(BTD[C])STNDLK	1|3	2.21|2.08	NA|0.03464	2.145	0.09192	4	2
P05198	98	P05198_98	EIF2S1	IF2A_HUMAN Eukaryotic translation initiation factor 2 subunit 1 OS=Homo sapiens OX=9606 GN=EIF2S1 PE=1 SV=3	VSPEEAIKC(BTD[C])EDK|VSPEEAIKC(BTD[C])EDK	3|2	2.03|2.255	0.07506|0.38891	2.1425	0.1591	5	2
Q13263	232	Q13263_232	TRIM28	TIF1B_HUMAN Transcription intermediary factor 1-beta OS=Homo sapiens OX=9606 GN=TRIM28 PE=1 SV=5	DC(BTD[C])QLNAHK|DC(BTD[C])QLNAHK	2|1	1.945|2.34	0.34648|NA	2.1425	0.27931	3	2
P13693	172	P13693_172	TPT1	TCTP_HUMAN Translationally-controlled tumor protein OS=Homo sapiens OX=9606 GN=TPT1 PE=1 SV=1	|DGLEMEKC(BTD[C])	|2	|2.14	|0.0	2.14	NA	2	1
P18206	422	P18206_422	VCL	VINC_HUMAN Vinculin OS=Homo sapiens OX=9606 GN=VCL PE=1 SV=4	|IAELC(BTD[C])DDPKER	|2	|2.14	|0.0	2.14	NA	2	1
P27708	1455	P27708_1455	CAD	PYR1_HUMAN CAD protein OS=Homo sapiens OX=9606 GN=CAD PE=1 SV=3	VHVDC(BTD[C])MTSQK|VHVDC(BTD[C])MTSQK	5|2	1.87|2.41	0.42465|0.07071	2.14	0.38184	7	2
Q13242	138	Q13242_138	SRSF9	SRSF9_HUMAN Serine/arginine-rich splicing factor 9 OS=Homo sapiens OX=9606 GN=SRSF9 PE=1 SV=1	EAGDVC(BTD[C])YADVQK|	1|	2.14|	NA|	2.14	NA	1	1
Q8NFH4	311	Q8NFH4_311	NUP37	NUP37_HUMAN Nucleoporin Nup37 OS=Homo sapiens OX=9606 GN=NUP37 PE=1 SV=1	|TLPLC(BTD[C])VIGGDHK	|1	|2.14	|NA	2.14	NA	1	1
P11387	630	P11387_630	TOP1	TOP1_HUMAN DNA topoisomerase 1 OS=Homo sapiens OX=9606 GN=TOP1 PE=1 SV=2	AVAILC(BTD[C])NHQR|AVAILC(BTD[C])NHQR	1|2	2.46|1.815	NA|0.47376	2.1375	0.45608	3	2
P02786	363	P02786_363	TFRC	TFR1_HUMAN Transferrin receptor protein 1 OS=Homo sapiens OX=9606 GN=TFRC PE=1 SV=2	TDSTC(BTD[C])R|TDSTC(BTD[C])R	5|4	2.18|2.09	0.43194|0.27	2.135	0.06364	9	2
Q00325	237	Q00325_237	SLC25A3	MPCP_HUMAN Phosphate carrier protein, mitochondrial OS=Homo sapiens OX=9606 GN=SLC25A3 PE=1 SV=2	|FAC(BTD[C])FER	|4	|2.135	|0.00577	2.135	NA	4	1
P55060	85	P55060_85	CSE1L	XPO2_HUMAN Exportin-2 OS=Homo sapiens OX=9606 GN=CSE1L PE=1 SV=3	IVEDEPNKIC(BTD[C])EADR|IVEDEPNKIC(BTD[C])EADR	1|2	2.23|2.03	NA|0.11314	2.13	0.14142	3	2
Q09666	2806	Q09666_2806	AHNAK	AHNK_HUMAN Neuroblast differentiation-associated protein AHNAK OS=Homo sapiens OX=9606 GN=AHNAK PE=1 SV=2	|VDVEC(BTD[C])PDVNIEGPEGK	|1	|2.13	|NA	2.13	NA	1	1
Q14315	2679	Q14315_2679	FLNC	FLNC_HUMAN Filamin-C OS=Homo sapiens OX=9606 GN=FLNC PE=1 SV=3	TPC(BTD[C])EEVYVK|TPC(BTD[C])EEVYVK	1|2	2.19|2.07	NA|0.0	2.13	0.08485	3	2
Q15042	117	Q15042_117	RAB3GAP1	RB3GP_HUMAN Rab3 GTPase-activating protein catalytic subunit OS=Homo sapiens OX=9606 GN=RAB3GAP1 PE=1 SV=3	AHC(BTD[C])LVR|	1|	2.13|	NA|	2.13	NA	1	1
Q68E01	141	Q68E01_141	INTS3	INT3_HUMAN Integrator complex subunit 3 OS=Homo sapiens OX=9606 GN=INTS3 PE=1 SV=1	LQDTC(BTD[C])R|	1|	2.13|	NA|	2.13	NA	1	1
Q9BXJ9	508	Q9BXJ9_508	NAA15	NAA15_HUMAN N-alpha-acetyltransferase 15, NatA auxiliary subunit OS=Homo sapiens OX=9606 GN=NAA15 PE=1 SV=1	|KC(BTD[C])HEIER	|1	|2.13	|NA	2.13	NA	1	1
Q9Y3C6	133	Q9Y3C6_133	PPIL1	PPIL1_HUMAN Peptidyl-prolyl cis-trans isomerase-like 1 OS=Homo sapiens OX=9606 GN=PPIL1 PE=1 SV=1	|VC(BTD[C])QGIGMVNR	|3	|2.13	|0.09815	2.13	NA	3	1
P56537	63	P56537_63	EIF6	IF6_HUMAN Eukaryotic translation initiation factor 6 OS=Homo sapiens OX=9606 GN=EIF6 PE=1 SV=1	MC(BTD[C])VGNR|MC(BTD[C])VGNR	2|3	2.17|2.08	0.12728|0.00577	2.125	0.06364	5	2
P40926	275	P40926_275	MDH2	MDHM_HUMAN Malate dehydrogenase, mitochondrial OS=Homo sapiens OX=9606 GN=MDH2 PE=1 SV=3	|EGVVEC(BTD[C])SFVK	|1	|2.12	|NA	2.12	NA	1	1
P61201	179	P61201_179	COPS2	CSN2_HUMAN COP9 signalosome complex subunit 2 OS=Homo sapiens OX=9606 GN=COPS2 PE=1 SV=1	QLHQSC(BTD[C])QTDDGEDDLKK|	1|	2.12|	NA|	2.12	NA	1	1
Q00537	233	Q00537_233	CDK17	CDK17_HUMAN Cyclin-dependent kinase 17 OS=Homo sapiens OX=9606 GN=CDK17 PE=1 SV=2	LEHEEGAPC(BTD[C])TAIR|	1|	2.12|	NA|	2.12	NA	1	1
Q01518	416	Q01518_416	CAP1	CAP1_HUMAN Adenylyl cyclase-associated protein 1 OS=Homo sapiens OX=9606 GN=CAP1 PE=1 SV=5	|TDGC(BTD[C])HAYLSK	|5	|2.12	|0.17627	2.12	NA	5	1
Q7Z6Z7	1879	Q7Z6Z7_1879	HUWE1	HUWE1_HUMAN E3 ubiquitin-protein ligase HUWE1 OS=Homo sapiens OX=9606 GN=HUWE1 PE=1 SV=3	|VLGPAAC(BTD[C])R	|1	|2.12	|NA	2.12	NA	1	1
Q8WTW3	72	Q8WTW3_72	COG1	COG1_HUMAN Conserved oligomeric Golgi complex subunit 1 OS=Homo sapiens OX=9606 GN=COG1 PE=1 SV=1	RC(BTD[C])AVGLVDAVK|	1|	2.12|	NA|	2.12	NA	1	1
Q92541	385	Q92541_385	RTF1	RTF1_HUMAN RNA polymerase-associated protein RTF1 homolog OS=Homo sapiens OX=9606 GN=RTF1 PE=1 SV=4	|TVTGC(BTD[C])FVR	|1	|2.12	|NA	2.12	NA	1	1
Q9Y490	1087	Q9Y490_1087	TLN1	TLN1_HUMAN Talin-1 OS=Homo sapiens OX=9606 GN=TLN1 PE=1 SV=3	LKPLPGETMEKC(BTD[C])TQDLGNSTK|LKPLPGETMEKC(BTD[C])TQDLGNSTK	2|1	2.35|1.89	0.5374|NA	2.12	0.32527	3	2
O15118	1261	O15118_1261	NPC1	NPC1_HUMAN NPC intracellular cholesterol transporter 1 OS=Homo sapiens OX=9606 GN=NPC1 PE=1 SV=2	SC(BTD[C])ATEER|	1|	2.11|	NA|	2.11	NA	1	1
P12236	160	P12236_160	SLC25A6	ADT3_HUMAN ADP/ATP translocase 3 OS=Homo sapiens OX=9606 GN=SLC25A6 PE=1 SV=4	|GLGDC(BTD[C])LVK	|3	|2.11	|0.01	2.11	NA	3	1
P78527	223	P78527_223	PRKDC	PRKDC_HUMAN DNA-dependent protein kinase catalytic subunit OS=Homo sapiens OX=9606 GN=PRKDC PE=1 SV=3	|LPVLAGC(BTD[C])LK	|4	|2.11	|0.0	2.11	NA	4	1
Q13404	71	Q13404_71	UBE2V1	UB2V1_HUMAN Ubiquitin-conjugating enzyme E2 variant 1 OS=Homo sapiens OX=9606 GN=UBE2V1 PE=1 SV=2	|IEC(BTD[C])GPK	|3	|2.11	|0.00577	2.11	NA	3	1
Q8NBS9	128	Q8NBS9_128	TXNDC5	TXND5_HUMAN Thioredoxin domain-containing protein 5 OS=Homo sapiens OX=9606 GN=TXNDC5 PE=1 SV=2	|VDCTAHSDVC(BTD[C])SAQGVR	|1	|2.11	|NA	2.11	NA	1	1
Q9BZG1	40	Q9BZG1_40	RAB34	RAB34_HUMAN Ras-related protein Rab-34 OS=Homo sapiens OX=9606 GN=RAB34 PE=1 SV=1	VTCAC(BTD[C])QEHR|	2|	2.11|	0.16971|	2.11	NA	2	1
Q9UIG0	497	Q9UIG0_497	BAZ1B	BAZ1B_HUMAN Tyrosine-protein kinase BAZ1B OS=Homo sapiens OX=9606 GN=BAZ1B PE=1 SV=2	|SALSC(BTD[C])VISK	|3	|2.11	|0.0	2.11	NA	3	1
O95373	736	O95373_736	IPO7	IPO7_HUMAN Importin-7 OS=Homo sapiens OX=9606 GN=IPO7 PE=1 SV=1	VLTGVAGEDAEC(BTD[C])HAAK|VLTGVAGEDAEC(BTD[C])HAAK	1|3	2.25|1.96	NA|0.10392	2.105	0.20506	4	2
O00192	421	O00192_421	ARVCF	ARVC_HUMAN Armadillo repeat protein deleted in velo-cardio-facial syndrome OS=Homo sapiens OX=9606 GN=ARVCF PE=1 SV=1	|RAC(BTD[C])GALR	|1	|2.1	|NA	2.1	NA	1	1
P31943	267	P31943_267	HNRNPH1	HNRH1_HUMAN Heterogeneous nuclear ribonucleoprotein H OS=Homo sapiens OX=9606 GN=HNRNPH1 PE=1 SV=4	|DLNYC(BTD[C])FSGMSDHR	|2	|2.1	|0.12728	2.1	NA	2	1
Q01518	375	Q01518_375	CAP1	CAP1_HUMAN Adenylyl cyclase-associated protein 1 OS=Homo sapiens OX=9606 GN=CAP1 PE=1 SV=5	|INSITVDNC(BTD[C])K	|2	|2.1	|0.0	2.1	NA	2	1
Q9HAV0	204	Q9HAV0_204	GNB4	GBB4_HUMAN Guanine nucleotide-binding protein subunit beta-4 OS=Homo sapiens OX=9606 GN=GNB4 PE=1 SV=3	|TFVSGAC(BTD[C])DASSK	|1	|2.1	|NA	2.1	NA	1	1
Q9HDC9	149	Q9HDC9_149	APMAP	APMAP_HUMAN Adipocyte plasma membrane-associated protein OS=Homo sapiens OX=9606 GN=APMAP PE=1 SV=2	TRDDEPVC(BTD[C])GR|	1|	2.1|	NA|	2.1	NA	1	1
Q9ULH0	28	Q9ULH0_28	KIDINS220	KDIS_HUMAN Kinase D-interacting substrate of 220 kDa OS=Homo sapiens OX=9606 GN=KIDINS220 PE=1 SV=3	ALLEKC(BTD[C])K|	1|	2.1|	NA|	2.1	NA	1	1
Q9Y2Q3	176	Q9Y2Q3_176	GSTK1	GSTK1_HUMAN Glutathione S-transferase kappa 1 OS=Homo sapiens OX=9606 GN=GSTK1 PE=1 SV=3	ETTEAAC(BTD[C])R|	2|	2.1|	0.01414|	2.1	NA	2	1
P61586	159	P61586_159	RHOA	RHOA_HUMAN Transforming protein RhoA OS=Homo sapiens OX=9606 GN=RHOA PE=1 SV=1	|IGAFGYMEC(BTD[C])SAK	|2	|2.09	|0.0	2.09	NA	2	1
P62888	85	P62888_85	RPL30	RL30_HUMAN 60S ribosomal protein L30 OS=Homo sapiens OX=9606 GN=RPL30 PE=1 SV=2	TGVHHYSGNNIELGTAC(BTD[C])GK|TGVHHYSGNNIELGTAC(BTD[C])GK	1|1	2.14|2.04	NA|NA	2.09	0.07071	2	2
Q2VPK5	268	Q2VPK5_268	CTU2	CTU2_HUMAN Cytoplasmic tRNA 2-thiolation protein 2 OS=Homo sapiens OX=9606 GN=CTU2 PE=1 SV=1	VMTGDSC(BTD[C])TR|	1|	2.09|	NA|	2.09	NA	1	1
Q99497	53	Q99497_53	PARK7	PARK7_HUMAN Protein/nucleic acid deglycase DJ-1 OS=Homo sapiens OX=9606 GN=PARK7 PE=1 SV=2	|DVVIC(BTD[C])PDASLEDAKK	|1	|2.09	|NA	2.09	NA	1	1
Q8NFD5	2114	Q8NFD5_2114	ARID1B	ARI1B_HUMAN AT-rich interactive domain-containing protein 1B OS=Homo sapiens OX=9606 GN=ARID1B PE=1 SV=2	KNPVC(BTD[C])R|	2|	2.085|	0.41719|	2.085	NA	2	1
Q8IUF8	19	Q8IUF8_19	RIOX2	RIOX2_HUMAN Ribosomal oxygenase 2 OS=Homo sapiens OX=9606 GN=RIOX2 PE=1 SV=1	EEGPAPC(BTD[C])K|EEGPAPC(BTD[C])K	1|2	1.81|2.345	NA|0.00707	2.0775	0.3783	3	2
O96019	32	O96019_32	ACTL6A	ACL6A_HUMAN Actin-like protein 6A OS=Homo sapiens OX=9606 GN=ACTL6A PE=1 SV=1	AGYAGEDC(BTD[C])PK|AGYAGEDC(BTD[C])PK	1|2	2.19|1.96	NA|0.01414	2.075	0.16263	3	2
P46060	169	P46060_169	RANGAP1	RAGP1_HUMAN Ran GTPase-activating protein 1 OS=Homo sapiens OX=9606 GN=RANGAP1 PE=1 SV=1	ILAAALTEC(BTD[C])HRK ILAAALTEC(BTD[C])HR|ILAAALTEC(BTD[C])HR	5|1	2.25|1.9	0.33653|NA	2.075	0.24749	6	2
P52272	653	P52272_653	HNRNPM	HNRPM_HUMAN Heterogeneous nuclear ribonucleoprotein M OS=Homo sapiens OX=9606 GN=HNRNPM PE=1 SV=3	KAC(BTD[C])QIFVR|KAC(BTD[C])QIFVR	3|4	2.26|1.89	0.17321|0.02828	2.075	0.26163	7	2
Q9NZ01	18	Q9NZ01_18	TECR	TECR_HUMAN Very-long-chain enoyl-CoA reductase OS=Homo sapiens OX=9606 GN=TECR PE=1 SV=1	|EKLC(BTD[C])FLDK	|2	|2.075	|0.17678	2.075	NA	2	1
O60313	786	O60313_786	OPA1	OPA1_HUMAN Dynamin-like 120 kDa protein, mitochondrial OS=Homo sapiens OX=9606 GN=OPA1 PE=1 SV=3	|TQEQC(BTD[C])VHNETK	|1	|2.07	|NA	2.07	NA	1	1
P22626	50	P22626_50	HNRNPA2B1	ROA2_HUMAN Heterogeneous nuclear ribonucleoproteins A2/B1 OS=Homo sapiens OX=9606 GN=HNRNPA2B1 PE=1 SV=2	|LTDC(BTD[C])VVMRDPASK	|1	|2.07	|NA	2.07	NA	1	1
P49189	45	P49189_45	ALDH9A1	AL9A1_HUMAN 4-trimethylaminobutyraldehyde dehydrogenase OS=Homo sapiens OX=9606 GN=ALDH9A1 PE=1 SV=3	VIATFTC(BTD[C])SGEK|	1|	2.07|	NA|	2.07	NA	1	1
O75083	194	O75083_194	WDR1	WDR1_HUMAN WD repeat-containing protein 1 OS=Homo sapiens OX=9606 GN=WDR1 PE=1 SV=4	FVNC(BTD[C])VR|FVNC(BTD[C])VR	2|1	2.0|2.13	0.46669|NA	2.065	0.09192	3	2
P61106	26	P61106_26	RAB14	RAB14_HUMAN Ras-related protein Rab-14 OS=Homo sapiens OX=9606 GN=RAB14 PE=1 SV=4	|SC(BTD[C])LLHQFTEK	|2	|2.065	|0.5869	2.065	NA	2	1
Q14974	543	Q14974_543	KPNB1	IMB1_HUMAN Importin subunit beta-1 OS=Homo sapiens OX=9606 GN=KPNB1 PE=1 SV=2	NSAKDC(BTD[C])YPAVQK DC(BTD[C])YPAVQK|DC(BTD[C])YPAVQK	4|1	2.15|1.98	0.5404|NA	2.065	0.12021	5	2
P18669	153	P18669_153	PGAM1	PGAM1_HUMAN Phosphoglycerate mutase 1 OS=Homo sapiens OX=9606 GN=PGAM1 PE=1 SV=2	|YADLTEDQLPSC(BTD[C])ESLK	|1	|2.06	|NA	2.06	NA	1	1
P19367	823	P19367_823	HK1	HXK1_HUMAN Hexokinase-1 OS=Homo sapiens OX=9606 GN=HK1 PE=1 SV=3	TVC(BTD[C])GVVSR|TVC(BTD[C])GVVSR	1|2	1.56|2.56	NA|0.0	2.06	0.70711	3	2
P53618	684	P53618_684	COPB1	COPB_HUMAN Coatomer subunit beta OS=Homo sapiens OX=9606 GN=COPB1 PE=1 SV=3	NEMNC(BTD[C])K|NEMNC(BTD[C])K	3|2	2.4|1.72	0.26851|0.0	2.06	0.48083	5	2
P60900	47	P60900_47	PSMA6	PSA6_HUMAN Proteasome subunit alpha type-6 OS=Homo sapiens OX=9606 GN=PSMA6 PE=1 SV=1	|GKDC(BTD[C])AVIVTQK	|5	|2.06	|0.01643	2.06	NA	5	1
Q08211	242	Q08211_242	DHX9	DHX9_HUMAN ATP-dependent RNA helicase A OS=Homo sapiens OX=9606 GN=DHX9 PE=1 SV=4	|LAAQSC(BTD[C])ALSLVR	|3	|2.06	|0.00577	2.06	NA	3	1
Q9H3H5	42	Q9H3H5_42	DPAGT1	GPT_HUMAN UDP-N-acetylglucosamine--dolichyl-phosphate N-acetylglucosaminephosphotransferase OS=Homo sapiens OX=9606 GN=DPAGT1 PE=1 SV=2	LC(BTD[C])GQDLNK|	1|	2.06|	NA|	2.06	NA	1	1
Q9UBB4	65	Q9UBB4_65	ATXN10	ATX10_HUMAN Ataxin-10 OS=Homo sapiens OX=9606 GN=ATXN10 PE=1 SV=1	|SSHAVELAC(BTD[C])R	|1	|2.06	|NA	2.06	NA	1	1
Q9Y399	162	Q9Y399_162	MRPS2	RT02_HUMAN 28S ribosomal protein S2, mitochondrial OS=Homo sapiens OX=9606 GN=MRPS2 PE=1 SV=1	|DC(BTD[C])GEYAHTR	|1	|2.06	|NA	2.06	NA	1	1
P62906	74	P62906_74	RPL10A	RL10A_HUMAN 60S ribosomal protein L10a OS=Homo sapiens OX=9606 GN=RPL10A PE=1 SV=2	FSVCVLGDQQHC(BTD[C])DEAK|FSVCVLGDQQHC(BTD[C])DEAK	1|1	2.27|1.84	NA|NA	2.055	0.30406	2	2
O95239	443	O95239_443	KIF4A	KIF4A_HUMAN Chromosome-associated kinesin KIF4A OS=Homo sapiens OX=9606 GN=KIF4A PE=1 SV=3	QHAAC(BTD[C])K|	2|	2.05|	0.0|	2.05	NA	2	1
P55265	1036	P55265_1036	ADAR	DSRAD_HUMAN Double-stranded RNA-specific adenosine deaminase OS=Homo sapiens OX=9606 GN=ADAR PE=1 SV=4	|TMSC(BTD[C])SDK	|1	|2.05	|NA	2.05	NA	1	1
P62851	59	P62851_59	RPS25	RS25_HUMAN 40S ribosomal protein S25 OS=Homo sapiens OX=9606 GN=RPS25 PE=1 SV=1	|ATYDKLC(BTD[C])K	|5	|2.05	|0.02881	2.05	NA	5	1
Q99729	224	Q99729_224	HNRNPAB	ROAA_HUMAN Heterogeneous nuclear ribonucleoprotein A/B OS=Homo sapiens OX=9606 GN=HNRNPAB PE=1 SV=2	FHTVSGSKC(BTD[C])EIK|	1|	2.05|	NA|	2.05	NA	1	1
Q12931	573	Q12931_573	TRAP1	TRAP1_HUMAN Heat shock protein 75 kDa, mitochondrial OS=Homo sapiens OX=9606 GN=TRAP1 PE=1 SV=3	|SPAAEC(BTD[C])LSEK	|2	|2.045	|0.02121	2.045	NA	2	1
P21980	230	P21980_230	TGM2	TGM2_HUMAN Protein-glutamine gamma-glutamyltransferase 2 OS=Homo sapiens OX=9606 GN=TGM2 PE=1 SV=2	|VVSGMVNC(BTD[C])NDDQGVLLGR	|1	|2.04	|NA	2.04	NA	1	1
P55884	527	P55884_527	EIF3B	EIF3B_HUMAN Eukaryotic translation initiation factor 3 subunit B OS=Homo sapiens OX=9606 GN=EIF3B PE=1 SV=3	|NGDYLC(BTD[C])VK	|1	|2.04	|NA	2.04	NA	1	1
Q8N684	389	Q8N684_389	CPSF7	CPSF7_HUMAN Cleavage and polyadenylation specificity factor subunit 7 OS=Homo sapiens OX=9606 GN=CPSF7 PE=1 SV=1	VANDERC(BTD[C])R|VANDERC(BTD[C])R	1|1	1.92|2.16	NA|NA	2.04	0.16971	2	2
Q96ST3	910	Q96ST3_910	SIN3A	SIN3A_HUMAN Paired amphipathic helix protein Sin3a OS=Homo sapiens OX=9606 GN=SIN3A PE=1 SV=2	IC(BTD[C])SQAER|	2|	2.04|	0.0|	2.04	NA	2	1
O00159	480	O00159_480	MYO1C	MYO1C_HUMAN Unconventional myosin-Ic OS=Homo sapiens OX=9606 GN=MYO1C PE=1 SV=4	|IIC(BTD[C])DLVEEK	|1	|2.03	|NA	2.03	NA	1	1
O00571	341	O00571_341	DDX3X	DDX3X_HUMAN ATP-dependent RNA helicase DDX3X OS=Homo sapiens OX=9606 GN=DDX3X PE=1 SV=3	|IGLDFC(BTD[C])K	|1	|2.03	|NA	2.03	NA	1	1
O94915	1188	O94915_1188	FRYL	FRYL_HUMAN Protein furry homolog-like OS=Homo sapiens OX=9606 GN=FRYL PE=1 SV=2	VAAGC(BTD[C])FK|	1|	2.03|	NA|	2.03	NA	1	1
P48643	181	P48643_181	CCT5	TCPE_HUMAN T-complex protein 1 subunit epsilon OS=Homo sapiens OX=9606 GN=CCT5 PE=1 SV=1	VVNSC(BTD[C])HR|VVNSC(BTD[C])HR	3|3	2.1|1.96	0.02082|0.00577	2.03	0.09899	6	2
Q00610	617	Q00610_617	CLTC	CLH1_HUMAN Clathrin heavy chain 1 OS=Homo sapiens OX=9606 GN=CLTC PE=1 SV=5	AHIAQLC(BTD[C])EK|AHIAQLC(BTD[C])EK	3|6	2.03|2.03	0.06807|0.01033	2.03	0	9	2
O43414	313	O43414_313	ERI3	ERI3_HUMAN ERI1 exoribonuclease 3 OS=Homo sapiens OX=9606 GN=ERI3 PE=1 SV=2	PHSGIDDC(BTD[C])K|	2|	2.025|	0.74246|	2.025	NA	2	1
O75083	225	O75083_225	WDR1	WDR1_HUMAN WD repeat-containing protein 1 OS=Homo sapiens OX=9606 GN=WDR1 PE=1 SV=4	VC(BTD[C])ALGGSK|VC(BTD[C])ALGGSK	1|1	2.12|1.93	NA|NA	2.025	0.13435	2	2
Q09161	73	Q09161_73	NCBP1	NCBP1_HUMAN Nuclear cap-binding protein subunit 1 OS=Homo sapiens OX=9606 GN=NCBP1 PE=1 SV=1	LLC(BTD[C])TVAR|	1|	2.02|	NA|	2.02	NA	1	1
Q86U44	483	Q86U44_483	METTL3	MTA70_HUMAN N6-adenosine-methyltransferase catalytic subunit OS=Homo sapiens OX=9606 GN=METTL3 PE=1 SV=2	|EHC(BTD[C])LVGVK	|1	|2.02	|NA	2.02	NA	1	1
Q8TEC5	15	Q8TEC5_15	SH3RF2	SH3R2_HUMAN E3 ubiquitin-protein ligase SH3RF2 OS=Homo sapiens OX=9606 GN=SH3RF2 PE=1 SV=3	|PVC(BTD[C])FEK	|1	|2.02	|NA	2.02	NA	1	1
Q9Y4W2	256	Q9Y4W2_256	LAS1L	LAS1L_HUMAN Ribosomal biogenesis protein LAS1L OS=Homo sapiens OX=9606 GN=LAS1L PE=1 SV=2	GSEEVDSHC(BTD[C])K|	1|	2.02|	NA|	2.02	NA	1	1
P11172	174	P11172_174	UMPS	UMPS_HUMAN Uridine 5'-monophosphate synthase OS=Homo sapiens OX=9606 GN=UMPS PE=1 SV=1	LHSVC(BTD[C])TLSK|LHSVC(BTD[C])TLSK	2|2	2.05|1.985	0.0|0.00707	2.0175	0.04596	4	2
Q9NQT5	67	Q9NQT5_67	EXOSC3	EXOS3_HUMAN Exosome complex component RRP40 OS=Homo sapiens OX=9606 GN=EXOSC3 PE=1 SV=3	VVC(BTD[C])GPGLR|VVC(BTD[C])GPGLR	1|2	2.17|1.86	NA|0.19799	2.015	0.2192	3	2
Q9Y3A3	160	Q9Y3A3_160	MOB4	PHOCN_HUMAN MOB-like protein phocein OS=Homo sapiens OX=9606 GN=MOB4 PE=1 SV=1	LGSVC(BTD[C])R|LGSVC(BTD[C])R	2|1	2.15|1.88	0.0|NA	2.015	0.19092	3	2
O75306	347	O75306_347	NDUFS2	NDUS2_HUMAN NADH dehydrogenase [ubiquinone] iron-sulfur protein 2, mitochondrial OS=Homo sapiens OX=9606 GN=NDUFS2 PE=1 SV=2	IIAQC(BTD[C])LNK|	1|	2.01|	NA|	2.01	NA	1	1
P26358	62	P26358_62	DNMT1	DNMT1_HUMAN DNA (cytosine-5)-methyltransferase 1 OS=Homo sapiens OX=9606 GN=DNMT1 PE=1 SV=2	NQLC(BTD[C])DLETK|NQLC(BTD[C])DLETK	1|2	2.27|1.75	NA|0.0	2.01	0.3677	3	2
P51991	196	P51991_196	HNRNPA3	ROA3_HUMAN Heterogeneous nuclear ribonucleoprotein A3 OS=Homo sapiens OX=9606 GN=HNRNPA3 PE=1 SV=2	YHTINGHNC(BTD[C])EVK|	1|	2.01|	NA|	2.01	NA	1	1
Q16543	54	Q16543_54	CDC37	CDC37_HUMAN Hsp90 co-chaperone Cdc37 OS=Homo sapiens OX=9606 GN=CDC37 PE=1 SV=1	EKEELDRGC(BTD[C])R|	1|	2.01|	NA|	2.01	NA	1	1
Q9Y5M8	179	Q9Y5M8_179	SRPRB	SRPRB_HUMAN Signal recognition particle receptor subunit beta OS=Homo sapiens OX=9606 GN=SRPRB PE=1 SV=3	|NTPSFLIAC(BTD[C])NK	|2	|2.01	|0.0	2.01	NA	2	1
Q15149	4574	Q15149_4574	PLEC	PLEC_HUMAN Plectin OS=Homo sapiens OX=9606 GN=PLEC PE=1 SV=3	YLTC(BTD[C])PK|YLTC(BTD[C])PK	2|1	2.035|1.98	0.00707|NA	2.0075	0.03889	3	2
Q96TA1	405	Q96TA1_405	NIBAN2	NIBA2_HUMAN Protein Niban 2 OS=Homo sapiens OX=9606 GN=NIBAN2 PE=1 SV=3	MQSC(BTD[C])YEK|MQSC(BTD[C])YEK	2|1	2.125|1.89	0.02121|NA	2.0075	0.16617	3	2
P50416	742	P50416_742	CPT1A	CPT1A_HUMAN Carnitine O-palmitoyltransferase 1, liver isoform OS=Homo sapiens OX=9606 GN=CPT1A PE=1 SV=2	FSC(BTD[C])PETDSHR|FSC(BTD[C])PETDSHR	2|1	1.95|2.06	0.08485|NA	2.005	0.07778	3	2
Q5T4S7	3864	Q5T4S7_3864	UBR4	UBR4_HUMAN E3 ubiquitin-protein ligase UBR4 OS=Homo sapiens OX=9606 GN=UBR4 PE=1 SV=1	ALSVLGC(BTD[C])GHTSSTK|	1|	2.0|	NA|	2	NA	1	1
Q7KZ85	1281	Q7KZ85_1281	SUPT6H	SPT6H_HUMAN Transcription elongation factor SPT6 OS=Homo sapiens OX=9606 GN=SUPT6H PE=1 SV=2	|FSADLTC(BTD[C])R	|1	|2.0	|NA	2	NA	1	1
Q8TEX9	870	Q8TEX9_870	IPO4	IPO4_HUMAN Importin-4 OS=Homo sapiens OX=9606 GN=IPO4 PE=1 SV=2	QGC(BTD[C])TVAEK|	2|	2.0|	0.0|	2	NA	2	1
Q99832	310	Q99832_310	CCT7	TCPH_HUMAN T-complex protein 1 subunit eta OS=Homo sapiens OX=9606 GN=CCT7 PE=1 SV=2	DMFC(BTD[C])AGR|DMFC(BTD[C])AGR	1|1	2.12|1.88	NA|NA	2	0.16971	2	2
Q9BS26	92	Q9BS26_92	ERP44	ERP44_HUMAN Endoplasmic reticulum resident protein 44 OS=Homo sapiens OX=9606 GN=ERP44 PE=1 SV=1	|VDC(BTD[C])DQHSDIAQR	|1	|2.0	|NA	2	NA	1	1
Q9BWD1	360	Q9BWD1_360	ACAT2	THIC_HUMAN Acetyl-CoA acetyltransferase, cytosolic OS=Homo sapiens OX=9606 GN=ACAT2 PE=1 SV=2	|VNIEGGAIALGHPLGASGC(BTD[C])R	|2	|2.0	|0.18385	2	NA	2	1
Q9HAU5	687	Q9HAU5_687	UPF2	RENT2_HUMAN Regulator of nonsense transcripts 2 OS=Homo sapiens OX=9606 GN=UPF2 PE=1 SV=1	NDTLHC(BTD[C])LK|	1|	2.0|	NA|	2	NA	1	1
Q9NRL3	713	Q9NRL3_713	STRN4	STRN4_HUMAN Striatin-4 OS=Homo sapiens OX=9606 GN=STRN4 PE=1 SV=2	TC(BTD[C])VQEITAHR|	1|	2.0|	NA|	2	NA	1	1
P07237	312	P07237_312	P4HB	PDIA1_HUMAN Protein disulfide-isomerase OS=Homo sapiens OX=9606 GN=P4HB PE=1 SV=3	KEEC(BTD[C])PAVR EEC(BTD[C])PAVR|KEEC(BTD[C])PAVR	9|7	2.01|1.98	0.77941|0.01414	1.995	0.02121	16	2
O75369	2115	O75369_2115	FLNB	FLNB_HUMAN Filamin-B OS=Homo sapiens OX=9606 GN=FLNB PE=1 SV=2	|APSVATVGSIC(BTD[C])DLNLK	|2	|1.99	|0.14142	1.99	NA	2	1
O75954	190	O75954_190	TSPAN9	TSN9_HUMAN Tetraspanin-9 OS=Homo sapiens OX=9606 GN=TSPAN9 PE=1 SV=1	|TGC(BTD[C])YEK	|1	|1.99	|NA	1.99	NA	1	1
P18074	116	P18074_116	ERCC2	ERCC2_HUMAN General transcription and DNA repair factor IIH helicase subunit XPD OS=Homo sapiens OX=9606 GN=ERCC2 PE=1 SV=1	|NLC(BTD[C])IHPEVTPLR	|2	|1.99	|0.0	1.99	NA	2	1
P35221	337	P35221_337	CTNNA1	CTNA1_HUMAN Catenin alpha-1 OS=Homo sapiens OX=9606 GN=CTNNA1 PE=1 SV=1	|IVAEC(BTD[C])NAVR	|2	|1.99	|0.0	1.99	NA	2	1
P54136	312	P54136_312	RARS	SYRC_HUMAN Arginine--tRNA ligase, cytoplasmic OS=Homo sapiens OX=9606 GN=RARS PE=1 SV=2	|LIC(BTD[C])DVSR	|1	|1.99	|NA	1.99	NA	1	1
P62937	62	P62937_62	PPIA	PPIA_HUMAN Peptidyl-prolyl cis-trans isomerase A OS=Homo sapiens OX=9606 GN=PPIA PE=1 SV=2	|IIPGFMC(BTD[C])QGGDFTR	|3	|1.99	|0.0	1.99	NA	3	1
Q9P055	189	Q9P055_189	JKAMP	JKAMP_HUMAN JNK1/MAPK8-associated membrane protein OS=Homo sapiens OX=9606 GN=JKAMP PE=2 SV=3	IAC(BTD[C])GLGK|	1|	1.99|	NA|	1.99	NA	1	1
P13489	191	P13489_191	RNH1	RINI_HUMAN Ribonuclease inhibitor OS=Homo sapiens OX=9606 GN=RNH1 PE=1 SV=2	VLC(BTD[C])QGLK|VLC(BTD[C])QGLK	1|2	1.95|2.02	NA|0.22627	1.985	0.0495	3	2
Q8N5C6	302	Q8N5C6_302	SRBD1	SRBD1_HUMAN S1 RNA-binding domain-containing protein 1 OS=Homo sapiens OX=9606 GN=SRBD1 PE=1 SV=2	AMLNC(BTD[C])K|	2|	1.985|	0.47376|	1.985	NA	2	1
P52788	237	P52788_237	SMS	SPSY_HUMAN Spermine synthase OS=Homo sapiens OX=9606 GN=SMS PE=1 SV=2	|KTC(BTD[C])GDVLDNLK	|1	|1.98	|NA	1.98	NA	1	1
Q10567	241	Q10567_241	AP1B1	AP1B1_HUMAN AP-1 complex subunit beta-1 OS=Homo sapiens OX=9606 GN=AP1B1 PE=1 SV=2	|EAQSIC(BTD[C])ER	|1	|1.98	|NA	1.98	NA	1	1
Q9H9Y6	146	Q9H9Y6_146	POLR1B	RPA2_HUMAN DNA-directed RNA polymerase I subunit RPA2 OS=Homo sapiens OX=9606 GN=POLR1B PE=1 SV=2	SKLC(BTD[C])NLR|	1|	1.98|	NA|	1.98	NA	1	1
Q9UHD1	157	Q9UHD1_157	CHORDC1	CHRD1_HUMAN Cysteine and histidine-rich domain-containing protein 1 OS=Homo sapiens OX=9606 GN=CHORDC1 PE=1 SV=2	IGTSC(BTD[C])K|IGTSC(BTD[C])K	2|2	2.06|1.9	0.0|0.0	1.98	0.11314	4	2
Q8TDN6	158	Q8TDN6_158	BRIX1	BRX1_HUMAN Ribosome biogenesis protein BRX1 homolog OS=Homo sapiens OX=9606 GN=BRIX1 PE=1 SV=2	MTGNC(BTD[C])LK|MTGNC(BTD[C])LK	1|3	2.07|1.88	NA|0.15588	1.975	0.13435	4	2
P21333	2601	P21333_2601	FLNA	FLNA_HUMAN Filamin-A OS=Homo sapiens OX=9606 GN=FLNA PE=1 SV=4	|TPC(BTD[C])EEILVK	|3	|1.97	|0.0	1.97	NA	3	1
P30086	133	P30086_133	PEBP1	PEBP1_HUMAN Phosphatidylethanolamine-binding protein 1 OS=Homo sapiens OX=9606 GN=PEBP1 PE=1 SV=3	PLKC(BTD[C])DEPILSNR|	1|	1.97|	NA|	1.97	NA	1	1
Q15075	255	Q15075_255	EEA1	EEA1_HUMAN Early endosome antigen 1 OS=Homo sapiens OX=9606 GN=EEA1 PE=1 SV=2	LKDEC(BTD[C])K|	1|	1.97|	NA|	1.97	NA	1	1
Q86WB0	149	Q86WB0_149	ZC3HC1	NIPA_HUMAN Nuclear-interacting partner of ALK OS=Homo sapiens OX=9606 GN=ZC3HC1 PE=1 SV=1	ALC(BTD[C])TAHEK|	1|	1.97|	NA|	1.97	NA	1	1
Q96N67	2125	Q96N67_2125	DOCK7	DOCK7_HUMAN Dedicator of cytokinesis protein 7 OS=Homo sapiens OX=9606 GN=DOCK7 PE=1 SV=4	|AVLPVTC(BTD[C])HR	|1	|1.97	|NA	1.97	NA	1	1
Q96T88	318	Q96T88_318	UHRF1	UHRF1_HUMAN E3 ubiquitin-protein ligase UHRF1 OS=Homo sapiens OX=9606 GN=UHRF1 PE=1 SV=1	VCAC(BTD[C])HLCGGR|	1|	1.97|	NA|	1.97	NA	1	1
Q9BPX3	202	Q9BPX3_202	NCAPG	CND3_HUMAN Condensin complex subunit 3 OS=Homo sapiens OX=9606 GN=NCAPG PE=1 SV=1	|AVLSC(BTD[C])IAPSAK	|2	|1.97	|0.0	1.97	NA	2	1
Q15149	3295	Q15149_3295	PLEC	PLEC_HUMAN Plectin OS=Homo sapiens OX=9606 GN=PLEC PE=1 SV=3	VPLDVAC(BTD[C])AR|VPLDVAC(BTD[C])AR	3|2	2.06|1.875	0.0781|0.24749	1.9675	0.13081	5	2
Q14790	164	Q14790_164	CASP8	CASP8_HUMAN Caspase-8 OS=Homo sapiens OX=9606 GN=CASP8 PE=1 SV=1	RVC(BTD[C])AQINK|RVC(BTD[C])AQINK	1|1	1.54|2.39	NA|NA	1.965	0.60104	2	2
O00571	317	O00571_317	DDX3X	DDX3X_HUMAN ATP-dependent RNA helicase DDX3X OS=Homo sapiens OX=9606 GN=DDX3X PE=1 SV=3	|GC(BTD[C])HLLVATPGR	|1	|1.96	|NA	1.96	NA	1	1
P22102	41	P22102_41	GART	PUR2_HUMAN Trifunctional purine biosynthetic protein adenosine-3 OS=Homo sapiens OX=9606 GN=GART PE=1 SV=1	|QVLVAPGNAGTAC(BTD[C])SEK	|1	|1.96	|NA	1.96	NA	1	1
P29317	612	P29317_612	EPHA2	EPHA2_HUMAN Ephrin type-A receptor 2 OS=Homo sapiens OX=9606 GN=EPHA2 PE=1 SV=2	FTTEIHPSC(BTD[C])VTR|FTTEIHPSC(BTD[C])VTR	1|1	1.45|2.47	NA|NA	1.96	0.72125	2	2
P43246	843	P43246_843	MSH2	MSH2_HUMAN DNA mismatch repair protein Msh2 OS=Homo sapiens OX=9606 GN=MSH2 PE=1 SV=1	HVIEC(BTD[C])AK|	1|	1.96|	NA|	1.96	NA	1	1
P53602	160	P53602_160	MVD	MVD1_HUMAN Diphosphomevalonate decarboxylase OS=Homo sapiens OX=9606 GN=MVD PE=1 SV=1	GSGSAC(BTD[C])R|GSGSAC(BTD[C])R	3|1	2.0|1.92	0.0|NA	1.96	0.05657	4	2
P55060	842	P55060_842	CSE1L	XPO2_HUMAN Exportin-2 OS=Homo sapiens OX=9606 GN=CSE1L PE=1 SV=3	KIC(BTD[C])AVGITK IC(BTD[C])AVGITK|KIC(BTD[C])AVGITK	7|5	2.19|1.73	0.28272|0.30578	1.96	0.32527	12	2
P60981	46	P60981_46	DSTN	DEST_HUMAN Destrin OS=Homo sapiens OX=9606 GN=DSTN PE=1 SV=3	|KC(BTD[C])IIVEEGK	|1	|1.96	|NA	1.96	NA	1	1
Q13951	48	Q13951_48	CBFB	PEBB_HUMAN Core-binding factor subunit beta OS=Homo sapiens OX=9606 GN=CBFB PE=1 SV=2	FQNAC(BTD[C])R|FQNAC(BTD[C])R	2|1	1.81|2.11	0.0|NA	1.96	0.21213	3	2
Q14997	710	Q14997_710	PSME4	PSME4_HUMAN Proteasome activator complex subunit 4 OS=Homo sapiens OX=9606 GN=PSME4 PE=1 SV=2	TLHLTC(BTD[C])K|	2|	1.96|	0.3677|	1.96	NA	2	1
Q6VY07	116	Q6VY07_116	PACS1	PACS1_HUMAN Phosphofurin acidic cluster sorting protein 1 OS=Homo sapiens OX=9606 GN=PACS1 PE=1 SV=2	SSSSC(BTD[C])VPR|	1|	1.96|	NA|	1.96	NA	1	1
Q9Y320	46	Q9Y320_46	TMX2	TMX2_HUMAN Thioredoxin-related transmembrane protein 2 OS=Homo sapiens OX=9606 GN=TMX2 PE=1 SV=1	|LPPLC(BTD[C])HGLPTQR	|1	|1.96	|NA	1.96	NA	1	1
Q9UQ80	296	Q9UQ80_296	PA2G4	PA2G4_HUMAN Proliferation-associated protein 2G4 OS=Homo sapiens OX=9606 GN=PA2G4 PE=1 SV=3	MGVVEC(BTD[C])AK|MGVVEC(BTD[C])AK	4|7	1.95|1.96	0.43866|0.04386	1.955	0.00707	11	2
P10809	237	P10809_237	HSPD1	CH60_HUMAN 60 kDa heat shock protein, mitochondrial OS=Homo sapiens OX=9606 GN=HSPD1 PE=1 SV=2	|GQKC(BTD[C])EFQDAYVLLSEK	|2	|1.95	|0.0	1.95	NA	2	1
P11216	319	P11216_319	PYGB	PYGB_HUMAN Glycogen phosphorylase, brain form OS=Homo sapiens OX=9606 GN=PYGB PE=1 SV=5	FGC(BTD[C])RDPVR|	1|	1.95|	NA|	1.95	NA	1	1
P13010	235	P13010_235	XRCC5	XRCC5_HUMAN X-ray repair cross-complementing protein 5 OS=Homo sapiens OX=9606 GN=XRCC5 PE=1 SV=3	|KLC(BTD[C])VFK	|1	|1.95	|NA	1.95	NA	1	1
P42892	428	P42892_428	ECE1	ECE1_HUMAN Endothelin-converting enzyme 1 OS=Homo sapiens OX=9606 GN=ECE1 PE=1 SV=2	KTC(BTD[C])LPR|KTC(BTD[C])LPR	3|1	1.96|1.94	0.03464|NA	1.95	0.01414	4	2
Q00610	1528	Q00610_1528	CLTC	CLH1_HUMAN Clathrin heavy chain 1 OS=Homo sapiens OX=9606 GN=CLTC PE=1 SV=5	|QSVELC(BTD[C])K	|1	|1.95	|NA	1.95	NA	1	1
Q15102	205	Q15102_205	PAFAH1B3	PA1B3_HUMAN Platelet-activating factor acetylhydrolase IB subunit gamma OS=Homo sapiens OX=9606 GN=PAFAH1B3 PE=1 SV=1	|LGYTPVC(BTD[C])R	|2	|1.95	|0.0	1.95	NA	2	1
Q16629	119	Q16629_119	SRSF7	SRSF7_HUMAN Serine/arginine-rich splicing factor 7 OS=Homo sapiens OX=9606 GN=SRSF7 PE=1 SV=1	|GHYAYDC(BTD[C])HR	|1	|1.95	|NA	1.95	NA	1	1
Q7KZF4	736	Q7KZF4_736	SND1	SND1_HUMAN Staphylococcal nuclease domain-containing protein 1 OS=Homo sapiens OX=9606 GN=SND1 PE=1 SV=1	RGEFC(BTD[C])IAK|	2|	1.95|	0.0|	1.95	NA	2	1
Q8N8S7	62	Q8N8S7_62	ENAH	ENAH_HUMAN Protein enabled homolog OS=Homo sapiens OX=9606 GN=ENAH PE=1 SV=2	IQDHQVVINC(BTD[C])AIPK|	1|	1.95|	NA|	1.95	NA	1	1
Q9Y2A7	327	Q9Y2A7_327	NCKAP1	NCKP1_HUMAN Nck-associated protein 1 OS=Homo sapiens OX=9606 GN=NCKAP1 PE=1 SV=1	INDIREC(BTD[C])K|INDIREC(BTD[C])K	3|1	2.03|1.87	0.24249|NA	1.95	0.11314	4	2
Q92945	379	Q92945_379	KHSRP	FUBP2_HUMAN Far upstream element-binding protein 2 OS=Homo sapiens OX=9606 GN=KHSRP PE=1 SV=4	IAHIMGPPDRC(BTD[C])EHAAR|IAHIMGPPDRC(BTD[C])EHAAR	2|1	1.725|2.16	0.17678|NA	1.9425	0.30759	3	2
P13804	68	P13804_68	ETFA	ETFA_HUMAN Electron transfer flavoprotein subunit alpha, mitochondrial OS=Homo sapiens OX=9606 GN=ETFA PE=1 SV=1	|VAQDLC(BTD[C])K	|2	|1.94	|0.0	1.94	NA	2	1
Q96I24	109	Q96I24_109	FUBP3	FUBP3_HUMAN Far upstream element-binding protein 3 OS=Homo sapiens OX=9606 GN=FUBP3 PE=1 SV=2	IQAESGC(BTD[C])K|IQAESGC(BTD[C])K	2|1	1.89|1.99	0.0|NA	1.94	0.07071	3	2
Q9Y6C9	79	Q9Y6C9_79	MTCH2	MTCH2_HUMAN Mitochondrial carrier homolog 2 OS=Homo sapiens OX=9606 GN=MTCH2 PE=1 SV=1	LC(BTD[C])SGVLGTVVHGK|	2|	1.94|	0.38184|	1.94	NA	2	1
P46060	152	P46060_152	RANGAP1	RAGP1_HUMAN Ran GTPase-activating protein 1 OS=Homo sapiens OX=9606 GN=RANGAP1 PE=1 SV=1	LNNC(BTD[C])GMGIGGGK|LNNC(BTD[C])GMGIGGGK	6|6	1.75|2.125	0.14721|0.13423	1.9375	0.26517	12	2
P62633	158	P62633_158	CNBP	CNBP_HUMAN Cellular nucleic acid-binding protein OS=Homo sapiens OX=9606 GN=CNBP PE=1 SV=1	TSEVNC(BTD[C])YR|TSEVNC(BTD[C])YR	2|4	2.02|1.85	0.0|0.2797	1.935	0.12021	6	2
P62701	65	P62701_65	RPS4X	RS4X_HUMAN 40S ribosomal protein S4, X isoform OS=Homo sapiens OX=9606 GN=RPS4X PE=1 SV=2	KIC(BTD[C])MQR|KIC(BTD[C])MQR	1|2	2.03|1.84	NA|0.0	1.935	0.13435	3	2
Q15637	279	Q15637_279	SF1	SF01_HUMAN Splicing factor 1 OS=Homo sapiens OX=9606 GN=SF1 PE=1 SV=4	SITNTTVC(BTD[C])TK|SITNTTVC(BTD[C])TK	2|1	2.04|1.83	0.0|NA	1.935	0.14849	3	2
P17813	207	P17813_207	ENG	EGLN_HUMAN Endoglin OS=Homo sapiens OX=9606 GN=ENG PE=1 SV=2	GC(BTD[C])HLEGVAGHK|GC(BTD[C])HLEGVAGHK	4|1	1.555|2.31	0.4821|NA	1.9325	0.53387	5	2
P12236	57	P12236_57	SLC25A6	ADT3_HUMAN ADP/ATP translocase 3 OS=Homo sapiens OX=9606 GN=SLC25A6 PE=1 SV=4	|GIVDC(BTD[C])IVR	|1	|1.93	|NA	1.93	NA	1	1
P30498	283	P30498_283	HLA-B	1B78_HUMAN HLA class I histocompatibility antigen, B-78 alpha chain OS=Homo sapiens OX=9606 GN=HLA-B PE=1 SV=1	|YTC(BTD[C])HVQHEGLPK	|3	|1.93	|0.0866	1.93	NA	3	1
Q14847	29	Q14847_29	LASP1	LASP1_HUMAN LIM and SH3 domain protein 1 OS=Homo sapiens OX=9606 GN=LASP1 PE=1 SV=2	|AC(BTD[C])FHCETCK	|1	|1.93	|NA	1.93	NA	1	1
Q93008	1724	Q93008_1724	USP9X	USP9X_HUMAN Probable ubiquitin carboxyl-terminal hydrolase FAF-X OS=Homo sapiens OX=9606 GN=USP9X PE=1 SV=3	IC(BTD[C])QGCPHR|	1|	1.93|	NA|	1.93	NA	1	1
Q99489	269	Q99489_269	DDO	OXDD_HUMAN D-aspartate oxidase OS=Homo sapiens OX=9606 GN=DDO PE=2 SV=1	C(BTD[C])NLREK|	1|	1.93|	NA|	1.93	NA	1	1
Q9BVI4	99	Q9BVI4_99	NOC4L	NOC4L_HUMAN Nucleolar complex protein 4 homolog OS=Homo sapiens OX=9606 GN=NOC4L PE=1 SV=1	YHSC(BTD[C])CNR|	1|	1.93|	NA|	1.93	NA	1	1
P27708	280	P27708_280	CAD	PYR1_HUMAN CAD protein OS=Homo sapiens OX=9606 GN=CAD PE=1 SV=3	GHNQPC(BTD[C])LLVGSGR|GHNQPC(BTD[C])LLVGSGR	1|1	1.78|2.07	NA|NA	1.925	0.20506	2	2
P30050	141	P30050_141	RPL12	RL12_HUMAN 60S ribosomal protein L12 OS=Homo sapiens OX=9606 GN=RPL12 PE=1 SV=1	|EILGTAQSVGC(BTD[C])NVDGR	|2	|1.925	|0.07778	1.925	NA	2	1
P49327	313	P49327_313	FASN	FAS_HUMAN Fatty acid synthase OS=Homo sapiens OX=9606 GN=FASN PE=1 SV=3	ALC(BTD[C])ATR|ALC(BTD[C])ATR	1|1	1.95|1.9	NA|NA	1.925	0.03536	2	2
P61221	88	P61221_88	ABCE1	ABCE1_HUMAN ATP-binding cassette sub-family E member 1 OS=Homo sapiens OX=9606 GN=ABCE1 PE=1 SV=1	YC(BTD[C])ANAFK|YC(BTD[C])ANAFK	1|2	1.72|2.13	NA|0.0	1.925	0.28991	3	2
P06733	357	P06733_357	ENO1	ENOA_HUMAN Alpha-enolase OS=Homo sapiens OX=9606 GN=ENO1 PE=1 SV=2	VNQIGSVTESIQAC(BTD[C])K|VNQIGSVTESIQAC(BTD[C])K	3|4	1.82|2.025	0.14731|0.04655	1.9225	0.14496	7	2
A6NHR9	1856	A6NHR9_1856	SMCHD1	SMHD1_HUMAN Structural maintenance of chromosomes flexible hinge domain-containing protein 1 OS=Homo sapiens OX=9606 GN=SMCHD1 PE=1 SV=2	ITHC(BTD[C])PTLLTR|	1|	1.92|	NA|	1.92	NA	1	1
P30260	623	P30260_623	CDC27	CDC27_HUMAN Cell division cycle protein 27 homolog OS=Homo sapiens OX=9606 GN=CDC27 PE=1 SV=2	|ALAC(BTD[C])FR	|1	|1.92	|NA	1.92	NA	1	1
Q95365	283	Q95365_283	HLA-B	1B38_HUMAN HLA class I histocompatibility antigen, B-38 alpha chain OS=Homo sapiens OX=9606 GN=HLA-B PE=1 SV=1	YTC(BTD[C])HVQHEGLPK|	1|	1.92|	NA|	1.92	NA	1	1
Q96AT9	217	Q96AT9_217	RPE	RPE_HUMAN Ribulose-phosphate 3-epimerase OS=Homo sapiens OX=9606 GN=RPE PE=1 SV=1	NVC(BTD[C])SEAAQK|	1|	1.92|	NA|	1.92	NA	1	1
Q99567	713	Q99567_713	NUP88	NUP88_HUMAN Nuclear pore complex protein Nup88 OS=Homo sapiens OX=9606 GN=NUP88 PE=1 SV=2	KC(BTD[C])IQSILK|	1|	1.92|	NA|	1.92	NA	1	1
Q9NQW6	978	Q9NQW6_978	ANLN	ANLN_HUMAN Anillin OS=Homo sapiens OX=9606 GN=ANLN PE=1 SV=2	|IKC(BTD[C])QVNSSVEER	|2	|1.92	|0.0	1.92	NA	2	1
Q9NR50	424	Q9NR50_424	EIF2B3	EI2BG_HUMAN Translation initiation factor eIF-2B subunit gamma OS=Homo sapiens OX=9606 GN=EIF2B3 PE=1 SV=1	GADIKDC(BTD[C])LIGSGQR|	1|	1.92|	NA|	1.92	NA	1	1
Q9Y277	229	Q9Y277_229	VDAC3	VDAC3_HUMAN Voltage-dependent anion-selective channel protein 3 OS=Homo sapiens OX=9606 GN=VDAC3 PE=1 SV=1	|YMLDC(BTD[C])R	|4	|1.92	|0.47343	1.92	NA	4	1
P55060	272	P55060_272	CSE1L	XPO2_HUMAN Exportin-2 OS=Homo sapiens OX=9606 GN=CSE1L PE=1 SV=3	SQIC(BTD[C])DNAALYAQK|SQIC(BTD[C])DNAALYAQK	2|3	1.795|2.04	0.00707|0.09815	1.9175	0.17324	5	2
Q99714	5	Q99714_5	HSD17B10	HCD2_HUMAN 3-hydroxyacyl-CoA dehydrogenase type-2 OS=Homo sapiens OX=9606 GN=HSD17B10 PE=1 SV=3	MAAAC(BTD[C])R|	2|	1.915|	1.30815|	1.915	NA	2	1
P06733	339	P06733_339	ENO1	ENOA_HUMAN Alpha-enolase OS=Homo sapiens OX=9606 GN=ENO1 PE=1 SV=2	|SCNC(BTD[C])LLLK	|1	|1.91	|NA	1.91	NA	1	1
P21796	232	P21796_232	VDAC1	VDAC1_HUMAN Voltage-dependent anion-selective channel protein 1 OS=Homo sapiens OX=9606 GN=VDAC1 PE=1 SV=2	|YQIDPDAC(BTD[C])FSAK	|1	|1.91	|NA	1.91	NA	1	1
P26639	630	P26639_630	TARS	SYTC_HUMAN Threonine--tRNA ligase, cytoplasmic OS=Homo sapiens OX=9606 GN=TARS PE=1 SV=3	|QVMVVPVGPTC(BTD[C])DEYAQK	|1	|1.91	|NA	1.91	NA	1	1
P45974	471	P45974_471	USP5	UBP5_HUMAN Ubiquitin carboxyl-terminal hydrolase 5 OS=Homo sapiens OX=9606 GN=USP5 PE=1 SV=2	IKC(BTD[C])LATEK|IKC(BTD[C])LATEK	2|1	2.05|1.77	0.0|NA	1.91	0.19799	3	2
P52597	122	P52597_122	HNRNPF	HNRPF_HUMAN Heterogeneous nuclear ribonucleoprotein F OS=Homo sapiens OX=9606 GN=HNRNPF PE=1 SV=3	|GLPFGC(BTD[C])TK	|3	|1.91	|0.00577	1.91	NA	3	1
P52948	1347	P52948_1347	NUP98	NUP98_HUMAN Nuclear pore complex protein Nup98-Nup96 OS=Homo sapiens OX=9606 GN=NUP98 PE=1 SV=4	ISEAC(BTD[C])SLAQQSGDHR|	1|	1.91|	NA|	1.91	NA	1	1
Q99497	46	Q99497_46	PARK7	PARK7_HUMAN Protein/nucleic acid deglycase DJ-1 OS=Homo sapiens OX=9606 GN=PARK7 PE=1 SV=2	DPVQC(BTD[C])SR|VTVAGLAGKDPVQC(BTD[C])SR	1|1	1.44|2.38	NA|NA	1.91	0.66468	2	2
Q9H9A6	438	Q9H9A6_438	LRRC40	LRC40_HUMAN Leucine-rich repeat-containing protein 40 OS=Homo sapiens OX=9606 GN=LRRC40 PE=1 SV=1	NQLC(BTD[C])EIPKR|	1|	1.91|	NA|	1.91	NA	1	1
Q8WUY1	168	Q8WUY1_168	THEM6	THEM6_HUMAN Protein THEM6 OS=Homo sapiens OX=9606 GN=THEM6 PE=1 SV=2	VVQHLC(BTD[C])QR|	2|	1.905|	0.17678|	1.905	NA	2	1
Q9NX61	25	Q9NX61_25	TMEM161A	T161A_HUMAN Transmembrane protein 161A OS=Homo sapiens OX=9606 GN=TMEM161A PE=1 SV=1	LAPHC(BTD[C])SFAR|LAPHC(BTD[C])SFAR	2|1	1.79|2.02	1.11723|NA	1.905	0.16263	3	2
O75369	1868	O75369_1868	FLNB	FLNB_HUMAN Filamin-B OS=Homo sapiens OX=9606 GN=FLNB PE=1 SV=2	AEISC(BTD[C])IDNK|	3|	1.9|	0.0|	1.9	NA	3	1
P61313	110	P61313_110	RPL15	RL15_HUMAN 60S ribosomal protein L15 OS=Homo sapiens OX=9606 GN=RPL15 PE=1 SV=2	HC(BTD[C])GALR|HC(BTD[C])GALR	3|2	1.9|1.9	0.02517|0.0	1.9	0	5	2
P63220	56	P63220_56	RPS21	RS21_HUMAN 40S ribosomal protein S21 OS=Homo sapiens OX=9606 GN=RPS21 PE=1 SV=1	|TYAIC(BTD[C])GAIR	|4	|1.9	|0.215	1.9	NA	4	1
Q13330	229	Q13330_229	MTA1	MTA1_HUMAN Metastasis-associated protein MTA1 OS=Homo sapiens OX=9606 GN=MTA1 PE=1 SV=2	ALDC(BTD[C])SSSVR|	1|	1.9|	NA|	1.9	NA	1	1
Q9H3U1	67	Q9H3U1_67	UNC45A	UN45A_HUMAN Protein unc-45 homolog A OS=Homo sapiens OX=9606 GN=UNC45A PE=1 SV=1	|AAC(BTD[C])HLK	|1	|1.9	|NA	1.9	NA	1	1
Q9Y624	74	Q9Y624_74	F11R	JAM1_HUMAN Junctional adhesion molecule A OS=Homo sapiens OX=9606 GN=F11R PE=1 SV=1	|LVC(BTD[C])YNNK	|1	|1.9	|NA	1.9	NA	1	1
Q96QK1	699	Q96QK1_699	VPS35	VPS35_HUMAN Vacuolar protein sorting-associated protein 35 OS=Homo sapiens OX=9606 GN=VPS35 PE=1 SV=2	VMEC(BTD[C])LKK|VMEC(BTD[C])LKK	3|5	1.89|1.9	0.06083|0.29712	1.895	0.00707	8	2
Q9BSJ8	370	Q9BSJ8_370	ESYT1	ESYT1_HUMAN Extended synaptotagmin-1 OS=Homo sapiens OX=9606 GN=ESYT1 PE=1 SV=1	LGTQTFC(BTD[C])SR|LGTQTFC(BTD[C])SR	1|1	2.06|1.73	NA|NA	1.895	0.23335	2	2
O00231	202	O00231_202	PSMD11	PSD11_HUMAN 26S proteasome non-ATPase regulatory subunit 11 OS=Homo sapiens OX=9606 GN=PSMD11 PE=1 SV=3	TTANAIYC(BTD[C])PPK|TTANAIYC(BTD[C])PPK	1|2	1.61|2.17	NA|0.12728	1.89	0.39598	3	2
P00338	131	P00338_131	LDHA	LDHA_HUMAN L-lactate dehydrogenase A chain OS=Homo sapiens OX=9606 GN=LDHA PE=1 SV=2	YSPNC(BTD[C])K|YSPNC(BTD[C])K	7|9	2.06|1.72	0.35991|0.57155	1.89	0.24042	16	2
P30530	205	P30530_205	AXL	UFO_HUMAN Tyrosine-protein kinase receptor UFO OS=Homo sapiens OX=9606 GN=AXL PE=1 SV=4	TSSFSC(BTD[C])EAHNAK|	1|	1.89|	NA|	1.89	NA	1	1
P78371	289	P78371_289	CCT2	TCPB_HUMAN T-complex protein 1 subunit beta OS=Homo sapiens OX=9606 GN=CCT2 PE=1 SV=4	HGINC(BTD[C])FINR|	1|	1.89|	NA|	1.89	NA	1	1
Q9H0B6	305	Q9H0B6_305	KLC2	KLC2_HUMAN Kinesin light chain 2 OS=Homo sapiens OX=9606 GN=KLC2 PE=1 SV=1	EAEPLC(BTD[C])K|EAEPLC(BTD[C])K	1|1	1.8|1.98	NA|NA	1.89	0.12728	2	2
P11940	132	P11940_132	PABPC1	PABP1_HUMAN Polyadenylate-binding protein 1 OS=Homo sapiens OX=9606 GN=PABPC1 PE=1 SV=2	VVC(BTD[C])DENGSK|VVC(BTD[C])DENGSK	1|3	1.95|1.81	NA|0.00577	1.88	0.09899	4	2
P25398	106	P25398_106	RPS12	RS12_HUMAN 40S ribosomal protein S12 OS=Homo sapiens OX=9606 GN=RPS12 PE=1 SV=3	VVGC(BTD[C])SCVVVK|	1|	1.88|	NA|	1.88	NA	1	1
P47813	51	P47813_51	EIF1AX	IF1AX_HUMAN Eukaryotic translation initiation factor 1A, X-chromosomal OS=Homo sapiens OX=9606 GN=EIF1AX PE=1 SV=2	|LEAMC(BTD[C])FDGVK	|1	|1.88	|NA	1.88	NA	1	1
P51452	124	P51452_124	DUSP3	DUS3_HUMAN Dual specificity protein phosphatase 3 OS=Homo sapiens OX=9606 GN=DUSP3 PE=1 SV=1	VLVHC(BTD[C])R|	1|	1.88|	NA|	1.88	NA	1	1
Q01081	163	Q01081_163	U2AF1	U2AF1_HUMAN Splicing factor U2AF 35 kDa subunit OS=Homo sapiens OX=9606 GN=U2AF1 PE=1 SV=3	QYEMGEC(BTD[C])TR|	1|	1.88|	NA|	1.88	NA	1	1
Q14204	3389	Q14204_3389	DYNC1H1	DYHC1_HUMAN Cytoplasmic dynein 1 heavy chain 1 OS=Homo sapiens OX=9606 GN=DYNC1H1 PE=1 SV=5	ASLAC(BTD[C])GPMVK|ASLAC(BTD[C])GPMVK	2|3	1.66|2.1	0.83439|0.20785	1.88	0.31113	5	2
Q5VW32	323	Q5VW32_323	BROX	BROX_HUMAN BRO1 domain-containing protein BROX OS=Homo sapiens OX=9606 GN=BROX PE=1 SV=1	NTLEKC(BTD[C])QR|NTLEKC(BTD[C])QR	2|1	2.08|1.68	0.02828|NA	1.88	0.28284	3	2
Q92598	650	Q92598_650	HSPH1	HS105_HUMAN Heat shock protein 105 kDa OS=Homo sapiens OX=9606 GN=HSPH1 PE=1 SV=1	DKLC(BTD[C])GPYEK|DKLC(BTD[C])GPYEK	4|4	2.0|1.76	0.0|0.151	1.88	0.16971	8	2
O76021	211	O76021_211	RSL1D1	RL1D1_HUMAN Ribosomal L1 domain-containing protein 1 OS=Homo sapiens OX=9606 GN=RSL1D1 PE=1 SV=3	SGSC(BTD[C])SAIR|SGSC(BTD[C])SAIR	3|1	1.92|1.83	0.10392|NA	1.875	0.06364	4	2
P17655	374	P17655_374	CAPN2	CAN2_HUMAN Calpain-2 catalytic subunit OS=Homo sapiens OX=9606 GN=CAPN2 PE=1 SV=6	GSTAGGC(BTD[C])R|GSTAGGC(BTD[C])R	4|4	1.86|1.89	0.0|0.375	1.875	0.02121	8	2
Q14315	477	Q14315_477	FLNC	FLNC_HUMAN Filamin-C OS=Homo sapiens OX=9606 GN=FLNC PE=1 SV=3	SPFPVHVSEACNPNAC(BTD[C])R|SPFPVHVSEACNPNAC(BTD[C])R	1|1	1.67|2.08	NA|NA	1.875	0.28991	2	2
Q9NX63	112	Q9NX63_112	CHCHD3	MIC19_HUMAN MICOS complex subunit MIC19 OS=Homo sapiens OX=9606 GN=CHCHD3 PE=1 SV=1	ERIC(BTD[C])SEEER|ERIC(BTD[C])SEEER	3|1	1.94|1.81	0.04619|NA	1.875	0.09192	4	2
P27348	134	P27348_134	YWHAQ	1433T_HUMAN 14-3-3 protein theta OS=Homo sapiens OX=9606 GN=YWHAQ PE=1 SV=1	YLAEVAC(BTD[C])GDDRK YLAEVAC(BTD[C])GDDR|YLAEVAC(BTD[C])GDDRK YLAEVAC(BTD[C])GDDR	6|6	1.895|1.85	0.26506|0.49598	1.8725	0.03182	12	2
O43684	270	O43684_270	BUB3	BUB3_HUMAN Mitotic checkpoint protein BUB3 OS=Homo sapiens OX=9606 GN=BUB3 PE=1 SV=1	LC(BTD[C])QFHR|	2|	1.87|	0.0|	1.87	NA	2	1
P17081	163	P17081_163	RHOQ	RHOQ_HUMAN Rho-related GTP-binding protein RhoQ OS=Homo sapiens OX=9606 GN=RHOQ PE=1 SV=2	|YVEC(BTD[C])SALTQK	|2	|1.87	|0.04243	1.87	NA	2	1
P25205	263	P25205_263	MCM3	MCM3_HUMAN DNA replication licensing factor MCM3 OS=Homo sapiens OX=9606 GN=MCM3 PE=1 SV=3	|TVLIAC(BTD[C])NVK	|1	|1.87	|NA	1.87	NA	1	1
P40189	48	P40189_48	IL6ST	IL6RB_HUMAN Interleukin-6 receptor subunit beta OS=Homo sapiens OX=9606 GN=IL6ST PE=1 SV=2	|AVC(BTD[C])VLK	|1	|1.87	|NA	1.87	NA	1	1
Q04759	281	Q04759_281	PRKCQ	KPCT_HUMAN Protein kinase C theta type OS=Homo sapiens OX=9606 GN=PRKCQ PE=1 SV=3	VANLC(BTD[C])GINQK|	1|	1.87|	NA|	1.87	NA	1	1
Q9H974	12	Q9H974_12	QTRT2	QTRT2_HUMAN Queuine tRNA-ribosyltransferase accessory subunit 2 OS=Homo sapiens OX=9606 GN=QTRT2 PE=1 SV=1	|VVNGC(BTD[C])R	|1	|1.87	|NA	1.87	NA	1	1
P05198	218	P05198_218	EIF2S1	IF2A_HUMAN Eukaryotic translation initiation factor 2 subunit 1 OS=Homo sapiens OX=9606 GN=EIF2S1 PE=1 SV=3	AGLNC(BTD[C])STENMPIK|AGLNC(BTD[C])STENMPIK	2|4	1.88|1.85	0.0|0.05252	1.865	0.02121	6	2
Q9NVN8	322	Q9NVN8_322	GNL3L	GNL3L_HUMAN Guanine nucleotide-binding protein-like 3-like protein OS=Homo sapiens OX=9606 GN=GNL3L PE=1 SV=1	NC(BTD[C])VHVQK|	2|	1.865|	0.91217|	1.865	NA	2	1
P15121	304	P15121_304	AKR1B1	ALDR_HUMAN Aldo-keto reductase family 1 member B1 OS=Homo sapiens OX=9606 GN=AKR1B1 PE=1 SV=3	VCALLSC(BTD[C])TSHK|VCALLSC(BTD[C])TSHK	1|1	2.1|1.62	NA|NA	1.86	0.33941	2	2
Q86UA1	413	Q86UA1_413	PRPF39	PRP39_HUMAN Pre-mRNA-processing factor 39 OS=Homo sapiens OX=9606 GN=PRPF39 PE=1 SV=3	AC(BTD[C])TIHLPK|	1|	1.86|	NA|	1.86	NA	1	1
Q99873	250	Q99873_250	PRMT1	ANM1_HUMAN Protein arginine N-methyltransferase 1 OS=Homo sapiens OX=9606 GN=PRMT1 PE=1 SV=3	|QLVTNAC(BTD[C])LIK	|3	|1.86	|0.0	1.86	NA	3	1
Q9BW27	230	Q9BW27_230	NUP85	NUP85_HUMAN Nuclear pore complex protein Nup85 OS=Homo sapiens OX=9606 GN=NUP85 PE=1 SV=1	EADASPASAGIC(BTD[C])R|	2|	1.86|	0.0|	1.86	NA	2	1
Q9BY42	51	Q9BY42_51	RTF2	RTF2_HUMAN Replication termination factor 2 OS=Homo sapiens OX=9606 GN=RTF2 PE=1 SV=3	|RPIVAC(BTD[C])ELGR	|1	|1.86	|NA	1.86	NA	1	1
P49720	19	P49720_19	PSMB3	PSB3_HUMAN Proteasome subunit beta type-3 OS=Homo sapiens OX=9606 GN=PSMB3 PE=1 SV=2	GKNC(BTD[C])VAIAADR|GKNC(BTD[C])VAIAADR	2|1	1.83|1.88	0.0|NA	1.855	0.03536	3	2
P78527	491	P78527_491	PRKDC	PRKDC_HUMAN DNA-dependent protein kinase catalytic subunit OS=Homo sapiens OX=9606 GN=PRKDC PE=1 SV=3	IC(BTD[C])SKPVVLPK|IC(BTD[C])SKPVVLPK	3|4	2.12|1.59	0.17898|0.18475	1.855	0.37477	7	2
Q07020	101	Q07020_101	RPL18	RL18_HUMAN 60S ribosomal protein L18 OS=Homo sapiens OX=9606 GN=RPL18 PE=1 SV=2	LKVC(BTD[C])ALR|LKVC(BTD[C])ALR	1|1	1.88|1.83	NA|NA	1.855	0.03536	2	2
Q08211	438	Q08211_438	DHX9	DHX9_HUMAN ATP-dependent RNA helicase A OS=Homo sapiens OX=9606 GN=DHX9 PE=1 SV=4	AAEC(BTD[C])NIVVTQPR|AAEC(BTD[C])NIVVTQPR	3|3	2.29|1.42	0.54271|0.50229	1.855	0.61518	6	2
Q12788	696	Q12788_696	TBL3	TBL3_HUMAN Transducin beta-like protein 3 OS=Homo sapiens OX=9606 GN=TBL3 PE=1 SV=2	RDPEAC(BTD[C])EK|	2|	1.855|	0.0495|	1.855	NA	2	1
Q96FV9	49	Q96FV9_49	THOC1	THOC1_HUMAN THO complex subunit 1 OS=Homo sapiens OX=9606 GN=THOC1 PE=1 SV=1	KC(BTD[C])TLDQAFR|KC(BTD[C])TLDQAFR	1|1	1.98|1.73	NA|NA	1.855	0.17678	2	2
Q9UPN3	986	Q9UPN3_986	MACF1	MACF1_HUMAN Microtubule-actin cross-linking factor 1, isoforms 1/2/3/5 OS=Homo sapiens OX=9606 GN=MACF1 PE=1 SV=4	SSAPGEC(BTD[C])HQIMK|SSAPGEC(BTD[C])HQIMK	2|1	2.22|1.49	0.79196|NA	1.855	0.51619	3	2
Q13838	239	Q13838_239	DDX39B	DX39B_HUMAN Spliceosome RNA helicase DDX39B OS=Homo sapiens OX=9606 GN=DDX39B PE=1 SV=1	EIRPVC(BTD[C])R|EIRPVC(BTD[C])R	2|5	1.915|1.79	0.0495|0.25134	1.8525	0.08839	7	2
O95782	492	O95782_492	AP2A1	AP2A1_HUMAN AP-2 complex subunit alpha-1 OS=Homo sapiens OX=9606 GN=AP2A1 PE=1 SV=3	TVFEALQAPAC(BTD[C])HENMVK|	1|	1.85|	NA|	1.85	NA	1	1
P30519	282	P30519_282	HMOX2	HMOX2_HUMAN Heme oxygenase 2 OS=Homo sapiens OX=9606 GN=HMOX2 PE=1 SV=2	GALEGSSC(BTD[C])PFR|	1|	1.85|	NA|	1.85	NA	1	1
P33316	222	P33316_222	DUT	DUT_HUMAN Deoxyuridine 5'-triphosphate nucleotidohydrolase, mitochondrial OS=Homo sapiens OX=9606 GN=DUT PE=1 SV=4	IAQLIC(BTD[C])ER|	1|	1.85|	NA|	1.85	NA	1	1
P55072	522	P55072_522	VCP	TERA_HUMAN Transitional endoplasmic reticulum ATPase OS=Homo sapiens OX=9606 GN=VCP PE=1 SV=4	|GVLFYGPPGC(BTD[C])GK	|2	|1.85	|0.0	1.85	NA	2	1
P60981	147	P60981_147	DSTN	DEST_HUMAN Destrin OS=Homo sapiens OX=9606 GN=DSTN PE=1 SV=3	|AC(BTD[C])IAEK	|2	|1.85	|0.0	1.85	NA	2	1
Q04917	112	Q04917_112	YWHAH	1433F_HUMAN 14-3-3 protein eta OS=Homo sapiens OX=9606 GN=YWHAH PE=1 SV=4	NC(BTD[C])NDFQYESK|	1|	1.85|	NA|	1.85	NA	1	1
Q15233	145	Q15233_145	NONO	NONO_HUMAN Non-POU domain-containing octamer-binding protein OS=Homo sapiens OX=9606 GN=NONO PE=1 SV=4	FAC(BTD[C])HSASLTVR|FAC(BTD[C])HSASLTVR	2|5	1.8|1.9	0.0|0.03834	1.85	0.07071	7	2
Q99426	216	Q99426_216	TBCB	TBCB_HUMAN Tubulin-folding cofactor B OS=Homo sapiens OX=9606 GN=TBCB PE=1 SV=2	|YFEC(BTD[C])QAK	|1	|1.85	|NA	1.85	NA	1	1
Q99613	752	Q99613_752	EIF3C	EIF3C_HUMAN Eukaryotic translation initiation factor 3 subunit C OS=Homo sapiens OX=9606 GN=EIF3C PE=1 SV=1	TC(BTD[C])HSFIINEK|TC(BTD[C])HSFIINEK	1|1	1.89|1.81	NA|NA	1.85	0.05657	2	2
Q9P2J5	936	Q9P2J5_936	LARS	SYLC_HUMAN Leucine--tRNA ligase, cytoplasmic OS=Homo sapiens OX=9606 GN=LARS PE=1 SV=2	PSHC(BTD[C])TIYVAK|	1|	1.85|	NA|	1.85	NA	1	1
P78527	458	P78527_458	PRKDC	PRKDC_HUMAN DNA-dependent protein kinase catalytic subunit OS=Homo sapiens OX=9606 GN=PRKDC PE=1 SV=3	MQLVCC(BTD[C])R|MQLVCC(BTD[C])R	1|3	2.22|1.47	NA|0.15011	1.845	0.53033	4	2
P51114	141	P51114_141	FXR1	FXR1_HUMAN Fragile X mental retardation syndrome-related protein 1 OS=Homo sapiens OX=9606 GN=FXR1 PE=1 SV=3	EAC(BTD[C])ANENAHK|EAC(BTD[C])ANENAHK	1|1	1.9|1.78	NA|NA	1.84	0.08485	2	2
Q14697	41	Q14697_41	GANAB	GANAB_HUMAN Neutral alpha-glucosidase AB OS=Homo sapiens OX=9606 GN=GANAB PE=1 SV=3	TC(BTD[C])EESSFCK|	1|	1.84|	NA|	1.84	NA	1	1
Q969V3	84	Q969V3_84	NCLN	NCLN_HUMAN Nicalin OS=Homo sapiens OX=9606 GN=NCLN PE=1 SV=2	RC(BTD[C])VLMR|RC(BTD[C])VLMR	1|1	1.57|2.11	NA|NA	1.84	0.38184	2	2
Q96EK5	231	Q96EK5_231	KIF1BP	KBP_HUMAN KIF1-binding protein OS=Homo sapiens OX=9606 GN=KIF1BP PE=1 SV=1	AAHYC(BTD[C])HSTLK|	1|	1.84|	NA|	1.84	NA	1	1
Q9BVV7	149	Q9BVV7_149	TIMM21	TIM21_HUMAN Mitochondrial import inner membrane translocase subunit Tim21 OS=Homo sapiens OX=9606 GN=TIMM21 PE=1 SV=1	ALEKC(BTD[C])R|	1|	1.84|	NA|	1.84	NA	1	1
P23528	80	P23528_80	CFL1	COF1_HUMAN Cofilin-1 OS=Homo sapiens OX=9606 GN=CFL1 PE=1 SV=3	MLPDKDC(BTD[C])R|MLPDKDC(BTD[C])R	27|28	1.85|1.82	0.40507|0.34513	1.835	0.02121	55	2
Q15738	132	Q15738_132	NSDHL	NSDHL_HUMAN Sterol-4-alpha-carboxylate 3-dehydrogenase, decarboxylating OS=Homo sapiens OX=9606 GN=NSDHL PE=1 SV=2	|NVIETC(BTD[C])K	|2	|1.835	|0.07778	1.835	NA	2	1
Q92598	658	Q92598_658	HSPH1	HS105_HUMAN Heat shock protein 105 kDa OS=Homo sapiens OX=9606 GN=HSPH1 PE=1 SV=1	FIC(BTD[C])EQDHQNFLR|FIC(BTD[C])EQDHQNFLR	1|1	1.76|1.91	NA|NA	1.835	0.10607	2	2
P07910	46	P07910_46	HNRNPC	HNRPC_HUMAN Heterogeneous nuclear ribonucleoproteins C1/C2 OS=Homo sapiens OX=9606 GN=HNRNPC PE=1 SV=4	IVGC(BTD[C])SVHK|IVGC(BTD[C])SVHK	4|4	1.89|1.77	0.05|0.03775	1.83	0.08485	8	2
P28838	129	P28838_129	LAP3	AMPL_HUMAN Cytosol aminopeptidase OS=Homo sapiens OX=9606 GN=LAP3 PE=1 SV=3	AAVAAGC(BTD[C])R|AAVAAGC(BTD[C])R	3|3	1.8|1.86	0.20785|0.00577	1.83	0.04243	6	2
Q5T6V5	227	Q5T6V5_227	C9orf64	QSPP_HUMAN Queuosine salvage protein OS=Homo sapiens OX=9606 GN=C9orf64 PE=1 SV=1	GDGC(BTD[C])FK|	1|	1.83|	NA|	1.83	NA	1	1
Q9BTE3	239	Q9BTE3_239	MCMBP	MCMBP_HUMAN Mini-chromosome maintenance complex-binding protein OS=Homo sapiens OX=9606 GN=MCMBP PE=1 SV=2	|GPAC(BTD[C])LVK	|2	|1.83	|0.0	1.83	NA	2	1
P05198	6	P05198_6	EIF2S1	IF2A_HUMAN Eukaryotic translation initiation factor 2 subunit 1 OS=Homo sapiens OX=9606 GN=EIF2S1 PE=1 SV=3	PGLSC(BTD[C])R|PGLSC(BTD[C])R	1|2	1.85|1.8	NA|0.0	1.825	0.03536	3	2
P15880	229	P15880_229	RPS2	RS2_HUMAN 40S ribosomal protein S2 OS=Homo sapiens OX=9606 GN=RPS2 PE=1 SV=2	GC(BTD[C])TATLGNFAK|GC(BTD[C])TATLGNFAK	1|1	1.93|1.71	NA|NA	1.82	0.15556	2	2
P27708	758	P27708_758	CAD	PYR1_HUMAN CAD protein OS=Homo sapiens OX=9606 GN=CAD PE=1 SV=3	IGSC(BTD[C])MK|IGSC(BTD[C])MK	4|4	1.445|2.195	0.44933|0.12124	1.82	0.53033	8	2
P62873	25	P62873_25	GNB1	GBB1_HUMAN Guanine nucleotide-binding protein G(I)/G(S)/G(T) subunit beta-1 OS=Homo sapiens OX=9606 GN=GNB1 PE=1 SV=3	|KAC(BTD[C])ADATLSQITNNIDPVGR	|1	|1.82	|NA	1.82	NA	1	1
P84103	10	P84103_10	SRSF3	SRSF3_HUMAN Serine/arginine-rich splicing factor 3 OS=Homo sapiens OX=9606 GN=SRSF3 PE=1 SV=1	DSCPLDC(BTD[C])K|	1|	1.82|	NA|	1.82	NA	1	1
Q1KMD3	293	Q1KMD3_293	HNRNPUL2	HNRL2_HUMAN Heterogeneous nuclear ribonucleoprotein U-like protein 2 OS=Homo sapiens OX=9606 GN=HNRNPUL2 PE=1 SV=1	|GKVC(BTD[C])FEAK	|1	|1.82	|NA	1.82	NA	1	1
Q00577	272	Q00577_272	PURA	PURA_HUMAN Transcriptional activator protein Pur-alpha OS=Homo sapiens OX=9606 GN=PURA PE=1 SV=2	FGHTFC(BTD[C])K|FGHTFC(BTD[C])K	2|3	1.855|1.78	0.2192|0.08083	1.8175	0.05303	5	2
Q12906	203	Q12906_203	ILF3	ILF3_HUMAN Interleukin enhancer-binding factor 3 OS=Homo sapiens OX=9606 GN=ILF3 PE=1 SV=3	QKC(BTD[C])LAALASLR|QKC(BTD[C])LAALASLR	1|2	2.08|1.545	NA|0.27577	1.8125	0.3783	3	2
P13798	312	P13798_312	APEH	ACPH_HUMAN Acylamino-acid-releasing enzyme OS=Homo sapiens OX=9606 GN=APEH PE=1 SV=4	LSPDQC(BTD[C])R|	1|	1.81|	NA|	1.81	NA	1	1
P18206	85	P18206_85	VCL	VINC_HUMAN Vinculin OS=Homo sapiens OX=9606 GN=VCL PE=1 SV=4	VENAC(BTD[C])TK|VENAC(BTD[C])TK	1|2	1.81|1.81	NA|0.0	1.81	0	3	2
Q92552	276	Q92552_276	MRPS27	RT27_HUMAN 28S ribosomal protein S27, mitochondrial OS=Homo sapiens OX=9606 GN=MRPS27 PE=1 SV=3	VAASPEDIKLC(BTD[C])R|VAASPEDIKLC(BTD[C])R	1|2	1.58|2.035	NA|0.16263	1.8075	0.32173	3	2
Q13200	779	Q13200_779	PSMD2	PSMD2_HUMAN 26S proteasome non-ATPase regulatory subunit 2 OS=Homo sapiens OX=9606 GN=PSMD2 PE=1 SV=3	GTLTLC(BTD[C])PYHSDR|GTLTLC(BTD[C])PYHSDR	2|1	1.87|1.74	0.24042|NA	1.805	0.09192	3	2
O15228	66	O15228_66	GNPAT	GNPAT_HUMAN Dihydroxyacetone phosphate acyltransferase OS=Homo sapiens OX=9606 GN=GNPAT PE=1 SV=1	GITPC(BTD[C])KPIDIK|	1|	1.8|	NA|	1.8	NA	1	1
O75410	174	O75410_174	TACC1	TACC1_HUMAN Transforming acidic coiled-coil-containing protein 1 OS=Homo sapiens OX=9606 GN=TACC1 PE=1 SV=2	AAHGC(BTD[C])VTAVSGK|	1|	1.8|	NA|	1.8	NA	1	1
P07814	1148	P07814_1148	EPRS	SYEP_HUMAN Bifunctional glutamate/proline--tRNA ligase OS=Homo sapiens OX=9606 GN=EPRS PE=1 SV=5	|LNQWC(BTD[C])NVVR	|1	|1.8	|NA	1.8	NA	1	1
P08559	273	P08559_273	PDHA1	ODPA_HUMAN Pyruvate dehydrogenase E1 component subunit alpha, somatic form, mitochondrial OS=Homo sapiens OX=9606 GN=PDHA1 PE=1 SV=3	FAAAYC(BTD[C])R|FAAAYC(BTD[C])R	3|3	2.01|1.59	0.14434|0.44456	1.8	0.29698	6	2
P19838	61	P19838_61	NFKB1	NFKB1_HUMAN Nuclear factor NF-kappa-B p105 subunit OS=Homo sapiens OX=9606 GN=NFKB1 PE=1 SV=2	YVC(BTD[C])EGPSHGGLPGASSEK|	1|	1.8|	NA|	1.8	NA	1	1
P30838	217	P30838_217	ALDH3A1	AL3A1_HUMAN Aldehyde dehydrogenase, dimeric NADP-preferring OS=Homo sapiens OX=9606 GN=ALDH3A1 PE=1 SV=3	SPC(BTD[C])YVDK|	1|	1.8|	NA|	1.8	NA	1	1
P31943	122	P31943_122	HNRNPH1	HNRH1_HUMAN Heterogeneous nuclear ribonucleoprotein H OS=Homo sapiens OX=9606 GN=HNRNPH1 PE=1 SV=4	|GLPFGC(BTD[C])SK	|3	|1.8	|0.40278	1.8	NA	3	1
Q15365	109	Q15365_109	PCBP1	PCBP1_HUMAN Poly(rC)-binding protein 1 OS=Homo sapiens OX=9606 GN=PCBP1 PE=1 SV=2	|LVVPATQC(BTD[C])GSLIGK	|3	|1.8	|0.12124	1.8	NA	3	1
Q14019	10	Q14019_10	COTL1	COTL1_HUMAN Coactosin-like protein OS=Homo sapiens OX=9606 GN=COTL1 PE=1 SV=3	IDKEAC(BTD[C])R|IDKEAC(BTD[C])R	6|3	1.905|1.69	0.42387|0.1159	1.7975	0.15203	9	2
O00116	349	O00116_349	AGPS	ADAS_HUMAN Alkyldihydroxyacetonephosphate synthase, peroxisomal OS=Homo sapiens OX=9606 GN=AGPS PE=1 SV=1	SC(BTD[C])QGPR|SC(BTD[C])QGPR	4|2	1.82|1.77	0.35024|0.0	1.795	0.03536	6	2
Q07955	16	Q07955_16	SRSF1	SRSF1_HUMAN Serine/arginine-rich splicing factor 1 OS=Homo sapiens OX=9606 GN=SRSF1 PE=1 SV=2	GPAGNNDC(BTD[C])R|GPAGNNDC(BTD[C])R	5|6	1.86|1.73	0.55007|0.23132	1.795	0.09192	11	2
Q9BR76	332	Q9BR76_332	CORO1B	COR1B_HUMAN Coronin-1B OS=Homo sapiens OX=9606 GN=CORO1B PE=1 SV=1	GLEVSKC(BTD[C])EIAR|GLEVSKC(BTD[C])EIAR	3|1	1.69|1.9	0.09238|NA	1.795	0.14849	4	2
P16930	408	P16930_408	FAH	FAAA_HUMAN Fumarylacetoacetase OS=Homo sapiens OX=9606 GN=FAH PE=1 SV=2	IGFGQC(BTD[C])AGK|	1|	1.79|	NA|	1.79	NA	1	1
Q15653	142	Q15653_142	NFKBIB	IKBB_HUMAN NF-kappa-B inhibitor beta OS=Homo sapiens OX=9606 GN=NFKBIB PE=1 SV=2	VGAHAC(BTD[C])AR|	1|	1.79|	NA|	1.79	NA	1	1
Q9ULV4	330	Q9ULV4_330	CORO1C	COR1C_HUMAN Coronin-1C OS=Homo sapiens OX=9606 GN=CORO1C PE=1 SV=1	GLDVNKC(BTD[C])EIAR|GLDVNKC(BTD[C])EIAR	3|2	1.72|1.86	0.12124|0.14142	1.79	0.09899	5	2
Q9UQ35	2116	Q9UQ35_2116	SRRM2	SRRM2_HUMAN Serine/arginine repetitive matrix protein 2 OS=Homo sapiens OX=9606 GN=SRRM2 PE=1 SV=2	MSC(BTD[C])FSR|	1|	1.79|	NA|	1.79	NA	1	1
P04844	72	P04844_72	RPN2	RPN2_HUMAN Dolichyl-diphosphooligosaccharide--protein glycosyltransferase subunit 2 OS=Homo sapiens OX=9606 GN=RPN2 PE=1 SV=3	KAC(BTD[C])TYIR|KAC(BTD[C])TYIR	3|4	1.31|2.265	0.32909|0.59489	1.7875	0.67529	7	2
P06400	853	P06400_853	RB1	RB_HUMAN Retinoblastoma-associated protein OS=Homo sapiens OX=9606 GN=RB1 PE=1 SV=2	INQMVC(BTD[C])NSDR|INQMVC(BTD[C])NSDR	1|1	1.84|1.73	NA|NA	1.785	0.07778	2	2
P39023	157	P39023_157	RPL3	RL3_HUMAN 60S ribosomal protein L3 OS=Homo sapiens OX=9606 GN=RPL3 PE=1 SV=2	YC(BTD[C])QVIR|KYC(BTD[C])QVIR YC(BTD[C])QVIR	1|6	1.59|1.98	NA|0.27766	1.785	0.27577	7	2
O94906	604	O94906_604	PRPF6	PRP6_HUMAN Pre-mRNA-processing factor 6 OS=Homo sapiens OX=9606 GN=PRPF6 PE=1 SV=1	AVAHC(BTD[C])PK|	2|	1.78|	0.2687|	1.78	NA	2	1
O94906	522	O94906_522	PRPF6	PRP6_HUMAN Pre-mRNA-processing factor 6 OS=Homo sapiens OX=9606 GN=PRPF6 PE=1 SV=1	AGSVATC(BTD[C])QAVMR|AGSVATC(BTD[C])QAVMR	1|2	1.78|1.78	NA|0.07071	1.78	0	3	2
P49591	300	P49591_300	SARS	SYSC_HUMAN Serine--tRNA ligase, cytoplasmic OS=Homo sapiens OX=9606 GN=SARS PE=1 SV=3	|YAGLSTC(BTD[C])FR	|2	|1.78	|0.0	1.78	NA	2	1
Q96QK1	286	Q96QK1_286	VPS35	VPS35_HUMAN Vacuolar protein sorting-associated protein 35 OS=Homo sapiens OX=9606 GN=VPS35 PE=1 SV=2	AC(BTD[C])AELHQNVNVK|AC(BTD[C])AELHQNVNVK	3|3	1.52|2.04	0.79674|0.0	1.78	0.3677	6	2
Q9Y2T2	288	Q9Y2T2_288	AP3M1	AP3M1_HUMAN AP-3 complex subunit mu-1 OS=Homo sapiens OX=9606 GN=AP3M1 PE=1 SV=1	ENSSC(BTD[C])GR|	1|	1.78|	NA|	1.78	NA	1	1
P62873	204	P62873_204	GNB1	GBB1_HUMAN Guanine nucleotide-binding protein G(I)/G(S)/G(T) subunit beta-1 OS=Homo sapiens OX=9606 GN=GNB1 PE=1 SV=3	LFVSGAC(BTD[C])DASAK|LFVSGAC(BTD[C])DASAK	2|1	1.76|1.79	0.0|NA	1.775	0.02121	3	2
Q3MHD2	127	Q3MHD2_127	LSM12	LSM12_HUMAN Protein LSM12 homolog OS=Homo sapiens OX=9606 GN=LSM12 PE=1 SV=2	TIKDC(BTD[C])K|TIKDC(BTD[C])K	4|1	1.785|1.76	0.07141|NA	1.7725	0.01768	5	2
O14530	135	O14530_135	TXNDC9	TXND9_HUMAN Thioredoxin domain-containing protein 9 OS=Homo sapiens OX=9606 GN=TXNDC9 PE=1 SV=2	|APFLC(BTD[C])ER	|1	|1.77	|NA	1.77	NA	1	1
P52657	98	P52657_98	GTF2A2	T2AG_HUMAN Transcription initiation factor IIA subunit 2 OS=Homo sapiens OX=9606 GN=GTF2A2 PE=1 SV=1	IVAC(BTD[C])DGK|	1|	1.77|	NA|	1.77	NA	1	1
Q9BVQ7	732	Q9BVQ7_732	SPATA5L1	SPA5L_HUMAN Spermatogenesis-associated protein 5-like protein 1 OS=Homo sapiens OX=9606 GN=SPATA5L1 PE=1 SV=2	|TVKPSLSC(BTD[C])K	|1	|1.77	|NA	1.77	NA	1	1
O75533	1244	O75533_1244	SF3B1	SF3B1_HUMAN Splicing factor 3B subunit 1 OS=Homo sapiens OX=9606 GN=SF3B1 PE=1 SV=3	VAIGPC(BTD[C])R|VAIGPC(BTD[C])R	2|2	1.76|1.77	0.0|0.0	1.765	0.00707	4	2
P61978	184	P61978_184	HNRNPK	HNRPK_HUMAN Heterogeneous nuclear ribonucleoprotein K OS=Homo sapiens OX=9606 GN=HNRNPK PE=1 SV=1	LFQEC(BTD[C])CPHSTDR|LFQEC(BTD[C])CPHSTDR	2|2	1.86|1.67	0.0|0.12728	1.765	0.13435	4	2
Q8IVF2	4223	Q8IVF2_4223	AHNAK2	AHNK2_HUMAN Protein AHNAK2 OS=Homo sapiens OX=9606 GN=AHNAK2 PE=1 SV=2	VQMPC(BTD[C])LK|VQMPC(BTD[C])LK	1|2	2.19|1.335	NA|0.10607	1.7625	0.60458	3	2
O60832	74	O60832_74	DKC1	DKC1_HUMAN H/ACA ribonucleoprotein complex subunit DKC1 OS=Homo sapiens OX=9606 GN=DKC1 PE=1 SV=3	|TTHYTPLAC(BTD[C])GSNPLK	|1	|1.76	|NA	1.76	NA	1	1
P42704	571	P42704_571	LRPPRC	LPPRC_HUMAN Leucine-rich PPR motif-containing protein, mitochondrial OS=Homo sapiens OX=9606 GN=LRPPRC PE=1 SV=3	YC(BTD[C])QEPR|YC(BTD[C])QEPR	1|2	1.95|1.57	NA|0.60811	1.76	0.2687	3	2
Q13418	346	Q13418_346	ILK	ILK_HUMAN Integrin-linked protein kinase OS=Homo sapiens OX=9606 GN=ILK PE=1 SV=2	|FSFQC(BTD[C])PGR	|3	|1.76	|0.0	1.76	NA	3	1
Q9UNF0	163	Q9UNF0_163	PACSIN2	PACN2_HUMAN Protein kinase C and casein kinase substrate in neurons protein 2 OS=Homo sapiens OX=9606 GN=PACSIN2 PE=1 SV=2	AHHAAC(BTD[C])K|	1|	1.76|	NA|	1.76	NA	1	1
Q13263	209	Q13263_209	TRIM28	TIF1B_HUMAN Transcription intermediary factor 1-beta OS=Homo sapiens OX=9606 GN=TRIM28 PE=1 SV=5	TVYC(BTD[C])NVHK|TVYC(BTD[C])NVHK	2|6	1.385|2.13	0.24749|0.00516	1.7575	0.52679	8	2
O43402	12	O43402_12	EMC8	EMC8_HUMAN ER membrane protein complex subunit 8 OS=Homo sapiens OX=9606 GN=EMC8 PE=1 SV=1	LTTQAYC(BTD[C])K|LTTQAYC(BTD[C])K	2|1	1.94|1.57	0.0|NA	1.755	0.26163	3	2
O95394	212	O95394_212	PGM3	AGM1_HUMAN Phosphoacetylglucosamine mutase OS=Homo sapiens OX=9606 GN=PGM3 PE=1 SV=1	|VDC(BTD[C])ANGIGALK	|1	|1.75	|NA	1.75	NA	1	1
Q13616	291	Q13616_291	CUL1	CUL1_HUMAN Cullin-1 OS=Homo sapiens OX=9606 GN=CUL1 PE=1 SV=2	|KC(BTD[C])EQVLIEK	|1	|1.75	|NA	1.75	NA	1	1
Q6I9Y2	90	Q6I9Y2_90	THOC7	THOC7_HUMAN THO complex subunit 7 homolog OS=Homo sapiens OX=9606 GN=THOC7 PE=1 SV=3	|EIEC(BTD[C])SIAGAHEK	|1	|1.75	|NA	1.75	NA	1	1
Q7Z2T5	132	Q7Z2T5_132	TRMT1L	TRM1L_HUMAN TRMT1-like protein OS=Homo sapiens OX=9606 GN=TRMT1L PE=1 SV=2	AC(BTD[C])NSHK|	1|	1.75|	NA|	1.75	NA	1	1
Q15046	434	Q15046_434	KARS	SYK_HUMAN Lysine--tRNA ligase OS=Homo sapiens OX=9606 GN=KARS PE=1 SV=3	AVEC(BTD[C])PPPR|AVEC(BTD[C])PPPR	4|3	1.83|1.66	0.29285|0.55866	1.745	0.12021	7	2
Q9BQG0	1031	Q9BQG0_1031	MYBBP1A	MBB1A_HUMAN Myb-binding protein 1A OS=Homo sapiens OX=9606 GN=MYBBP1A PE=1 SV=2	HQAC(BTD[C])LLLQK|HQAC(BTD[C])LLLQK	1|1	2.0|1.49	NA|NA	1.745	0.36062	2	2
Q9ULV4	343	Q9ULV4_343	CORO1C	COR1C_HUMAN Coronin-1C OS=Homo sapiens OX=9606 GN=CORO1C PE=1 SV=1	KC(BTD[C])EPIIMTVPR|KC(BTD[C])EPIIMTVPR	5|2	1.5|1.99	0.59614|0.32527	1.745	0.34648	7	2
P12081	235	P12081_235	HARS	SYHC_HUMAN Histidine--tRNA ligase, cytoplasmic OS=Homo sapiens OX=9606 GN=HARS PE=1 SV=2	TIC(BTD[C])SSVDKLDK|	1|	1.74|	NA|	1.74	NA	1	1
P55263	353	P55263_353	ADK	ADK_HUMAN Adenosine kinase OS=Homo sapiens OX=9606 GN=ADK PE=1 SV=2	|TGC(BTD[C])TFPEKPDFH	|1	|1.74	|NA	1.74	NA	1	1
Q13423	1073	Q13423_1073	NNT	NNTM_HUMAN NAD(P) transhydrogenase, mitochondrial OS=Homo sapiens OX=9606 GN=NNT PE=1 SV=3	KTC(BTD[C])DALQAK|KTC(BTD[C])DALQAK	1|3	1.46|2.02	NA|0.26558	1.74	0.39598	4	2
Q15008	112	Q15008_112	PSMD6	PSMD6_HUMAN 26S proteasome non-ATPase regulatory subunit 6 OS=Homo sapiens OX=9606 GN=PSMD6 PE=1 SV=1	AEYLC(BTD[C])R|	1|	1.74|	NA|	1.74	NA	1	1
Q8IZL8	522	Q8IZL8_522	PELP1	PELP1_HUMAN Proline-, glutamic acid- and leucine-rich protein 1 OS=Homo sapiens OX=9606 GN=PELP1 PE=1 SV=2	KGDSNANSDVC(BTD[C])AAALR|KGDSNANSDVC(BTD[C])AAALR	1|1	1.9|1.58	NA|NA	1.74	0.22627	2	2
Q96P48	638	Q96P48_638	ARAP1	ARAP1_HUMAN Arf-GAP with Rho-GAP domain, ANK repeat and PH domain-containing protein 1 OS=Homo sapiens OX=9606 GN=ARAP1 PE=1 SV=3	RC(BTD[C])HLEAK|	2|	1.74|	0.0|	1.74	NA	2	1
Q96T60	353	Q96T60_353	PNKP	PNKP_HUMAN Bifunctional polynucleotide phosphatase/kinase OS=Homo sapiens OX=9606 GN=PNKP PE=1 SV=1	|SGPLC(BTD[C])LPESR	|1	|1.74	|NA	1.74	NA	1	1
Q9NV70	566	Q9NV70_566	EXOC1	EXOC1_HUMAN Exocyst complex component 1 OS=Homo sapiens OX=9606 GN=EXOC1 PE=1 SV=4	QHNC(BTD[C])GTPLPVSSEK|	1|	1.74|	NA|	1.74	NA	1	1
O00116	413	O00116_413	AGPS	ADAS_HUMAN Alkyldihydroxyacetonephosphate synthase, peroxisomal OS=Homo sapiens OX=9606 GN=AGPS PE=1 SV=1	QRC(BTD[C])APASIR|QRC(BTD[C])APASIR	2|2	1.87|1.6	0.0|0.39598	1.735	0.19092	4	2
O00186	26	O00186_26	STXBP3	STXB3_HUMAN Syntaxin-binding protein 3 OS=Homo sapiens OX=9606 GN=STXBP3 PE=1 SV=2	|ATVFDDC(BTD[C])KK	|1	|1.73	|NA	1.73	NA	1	1
P17931	173	P17931_173	LGALS3	LEG3_HUMAN Galectin-3 OS=Homo sapiens OX=9606 GN=LGALS3 PE=1 SV=5	VIVC(BTD[C])NTK|	1|	1.73|	NA|	1.73	NA	1	1
P23284	202	P23284_202	PPIB	PPIB_HUMAN Peptidyl-prolyl cis-trans isomerase B OS=Homo sapiens OX=9606 GN=PPIB PE=1 SV=2	|DVIIADC(BTD[C])GK	|2	|1.73	|0.0	1.73	NA	2	1
P35579	1379	P35579_1379	MYH9	MYH9_HUMAN Myosin-9 OS=Homo sapiens OX=9606 GN=MYH9 PE=1 SV=4	|KMEDSVGC(BTD[C])LETAEEVK	|1	|1.73	|NA	1.73	NA	1	1
P78527	457	P78527_457	PRKDC	PRKDC_HUMAN DNA-dependent protein kinase catalytic subunit OS=Homo sapiens OX=9606 GN=PRKDC PE=1 SV=3	|MQLVC(BTD[C])CR	|1	|1.73	|NA	1.73	NA	1	1
Q96EK6	113	Q96EK6_113	GNPNAT1	GNA1_HUMAN Glucosamine 6-phosphate N-acetyltransferase OS=Homo sapiens OX=9606 GN=GNPNAT1 PE=1 SV=1	FIHSC(BTD[C])AK|	2|	1.73|	0.18385|	1.73	NA	2	1
Q96S97	279	Q96S97_279	MYADM	MYADM_HUMAN Myeloid-associated differentiation marker OS=Homo sapiens OX=9606 GN=MYADM PE=1 SV=2	DVSC(BTD[C])SR|	1|	1.73|	NA|	1.73	NA	1	1
P26885	42	P26885_42	FKBP2	FKBP2_HUMAN Peptidyl-prolyl cis-trans isomerase FKBP2 OS=Homo sapiens OX=9606 GN=FKBP2 PE=1 SV=2	VDHC(BTD[C])PIK|VDHC(BTD[C])PIK	2|3	1.495|1.96	0.81317|0.01155	1.7275	0.3288	5	2
P60953	157	P60953_157	CDC42	CDC42_HUMAN Cell division control protein 42 homolog OS=Homo sapiens OX=9606 GN=CDC42 PE=1 SV=2	YVEC(BTD[C])SALTQK|	2|	1.725|	0.14849|	1.725	NA	2	1
Q9BUF5	12	Q9BUF5_12	TUBB6	TBB6_HUMAN Tubulin beta-6 chain OS=Homo sapiens OX=9606 GN=TUBB6 PE=1 SV=1	EIVHIQAGQC(BTD[C])GNQIGTK|EIVHIQAGQC(BTD[C])GNQIGTK	1|1	1.54|1.91	NA|NA	1.725	0.26163	2	2
O00116	226	O00116_226	AGPS	ADAS_HUMAN Alkyldihydroxyacetonephosphate synthase, peroxisomal OS=Homo sapiens OX=9606 GN=AGPS PE=1 SV=1	IVNLAC(BTD[C])K|IVNLAC(BTD[C])K	2|1	1.95|1.49	0.0|NA	1.72	0.32527	3	2
P06733	337	P06733_337	ENO1	ENOA_HUMAN Alpha-enolase OS=Homo sapiens OX=9606 GN=ENO1 PE=1 SV=2	SC(BTD[C])NCLLLK|	3|	1.72|	0.63579|	1.72	NA	3	1
P24666	63	P24666_63	ACP1	PPAC_HUMAN Low molecular weight phosphotyrosine protein phosphatase OS=Homo sapiens OX=9606 GN=ACP1 PE=1 SV=3	GQSC(BTD[C])MK|	1|	1.72|	NA|	1.72	NA	1	1
Q15942	384	Q15942_384	ZYX	ZYX_HUMAN Zyxin OS=Homo sapiens OX=9606 GN=ZYX PE=1 SV=1	|QNVAVNELC(BTD[C])GR	|1	|1.72	|NA	1.72	NA	1	1
Q9NVX2	251	Q9NVX2_251	NLE1	NLE1_HUMAN Notchless protein homolog 1 OS=Homo sapiens OX=9606 GN=NLE1 PE=1 SV=4	ILTGHTQSVTC(BTD[C])LR|	1|	1.72|	NA|	1.72	NA	1	1
P52306	117	P52306_117	RAP1GDS1	GDS1_HUMAN Rap1 GTPase-GDP dissociation stimulator 1 OS=Homo sapiens OX=9606 GN=RAP1GDS1 PE=1 SV=3	ALGNIC(BTD[C])YDSHEGR|ALGNIC(BTD[C])YDSHEGR	1|1	1.52|1.91	NA|NA	1.715	0.27577	2	2
P68104	411	P68104_411	EEF1A1	EF1A1_HUMAN Elongation factor 1-alpha 1 OS=Homo sapiens OX=9606 GN=EEF1A1 PE=1 SV=1	|SGDAAIVDMVPGKPMC(BTD[C])VESFSDYPPLGR	|4	|1.715	|0.35336	1.715	NA	4	1
O60684	253	O60684_253	KPNA6	IMA7_HUMAN Importin subunit alpha-7 OS=Homo sapiens OX=9606 GN=KPNA6 PE=1 SV=1	|VSPC(BTD[C])LPVLSR	|2	|1.71	|0.0	1.71	NA	2	1
P36551	373	P36551_373	CPOX	HEM6_HUMAN Oxygen-dependent coproporphyrinogen-III oxidase, mitochondrial OS=Homo sapiens OX=9606 GN=CPOX PE=1 SV=3	KHC(BTD[C])DDSFTPQEK|	1|	1.71|	NA|	1.71	NA	1	1
P48509	192	P48509_192	CD151	CD151_HUMAN CD151 antigen OS=Homo sapiens OX=9606 GN=CD151 PE=1 SV=3	TVVALC(BTD[C])GQR|	1|	1.71|	NA|	1.71	NA	1	1
P49327	212	P49327_212	FASN	FAS_HUMAN Fatty acid synthase OS=Homo sapiens OX=9606 GN=FASN PE=1 SV=3	LGMLSPEGTC(BTD[C])K|LGMLSPEGTC(BTD[C])K	1|3	2.17|1.25	NA|0.65818	1.71	0.65054	4	2
P60842	66	P60842_66	EIF4A1	IF4A1_HUMAN Eukaryotic initiation factor 4A-I OS=Homo sapiens OX=9606 GN=EIF4A1 PE=1 SV=1	|AIIPC(BTD[C])IK	|4	|1.71	|0.47472	1.71	NA	4	1
Q16643	98	Q16643_98	DBN1	DREB_HUMAN Drebrin OS=Homo sapiens OX=9606 GN=DBN1 PE=1 SV=4	CAC(BTD[C])ASHVAK|	1|	1.71|	NA|	1.71	NA	1	1
Q53H12	72	Q53H12_72	AGK	AGK_HUMAN Acylglycerol kinase, mitochondrial OS=Homo sapiens OX=9606 GN=AGK PE=1 SV=2	|ATVFLNPAAC(BTD[C])K	|1	|1.71	|NA	1.71	NA	1	1
Q9BXJ9	721	Q9BXJ9_721	NAA15	NAA15_HUMAN N-alpha-acetyltransferase 15, NatA auxiliary subunit OS=Homo sapiens OX=9606 GN=NAA15 PE=1 SV=1	LFNTAVC(BTD[C])ESK|LFNTAVC(BTD[C])ESK	1|2	1.57|1.85	NA|0.0	1.71	0.19799	3	2
O95782	533	O95782_533	AP2A1	AP2A1_HUMAN AP-2 complex subunit alpha-1 OS=Homo sapiens OX=9606 GN=AP2A1 PE=1 SV=3	FHLC(BTD[C])SVATR|FHLC(BTD[C])SVATR	1|1	1.76|1.65	NA|NA	1.705	0.07778	2	2
P08670	328	P08670_328	VIM	VIME_HUMAN Vimentin OS=Homo sapiens OX=9606 GN=VIM PE=1 SV=4	|QVQSLTC(BTD[C])EVDALK	|4	|1.705	|0.0469	1.705	NA	4	1
P53597	60	P53597_60	SUCLG1	SUCA_HUMAN Succinate--CoA ligase [ADP/GDP-forming] subunit alpha, mitochondrial OS=Homo sapiens OX=9606 GN=SUCLG1 PE=1 SV=4	IIC(BTD[C])QGFTGK|IIC(BTD[C])QGFTGK	2|2	1.74|1.67	0.0|0.0	1.705	0.0495	4	2
P11766	282	P11766_282	ADH5	ADHX_HUMAN Alcohol dehydrogenase class-3 OS=Homo sapiens OX=9606 GN=ADH5 PE=1 SV=4	AALEAC(BTD[C])HK|AALEAC(BTD[C])HK	2|1	1.795|1.61	0.13435|NA	1.7025	0.13081	3	2
A6NDY0	180	A6NDY0_180	PABPN1L	EPAB2_HUMAN Embryonic polyadenylate-binding protein 2 OS=Homo sapiens OX=9606 GN=PABPN1L PE=2 SV=1	|VTILC(BTD[C])DK	|1	|1.7	|NA	1.7	NA	1	1
O60884	143	O60884_143	DNAJA2	DNJA2_HUMAN DnaJ homolog subfamily A member 2 OS=Homo sapiens OX=9606 GN=DNAJA2 PE=1 SV=1	|NVLC(BTD[C])SACSGQGGK	|1	|1.7	|NA	1.7	NA	1	1
P63165	52	P63165_52	SUMO1	SUMO1_HUMAN Small ubiquitin-related modifier 1 OS=Homo sapiens OX=9606 GN=SUMO1 PE=1 SV=1	ESYC(BTD[C])QR|	3|	1.7|	0.35501|	1.7	NA	3	1
Q8NCG7	86	Q8NCG7_86	DAGLB	DGLB_HUMAN Sn1-specific diacylglycerol lipase beta OS=Homo sapiens OX=9606 GN=DAGLB PE=1 SV=2	GTIC(BTD[C])NPGPR|	1|	1.7|	NA|	1.7	NA	1	1
Q99523	651	Q99523_651	SORT1	SORT_HUMAN Sortilin OS=Homo sapiens OX=9606 GN=SORT1 PE=1 SV=3	SSVC(BTD[C])QNGR|	1|	1.7|	NA|	1.7	NA	1	1
Q9HC38	221	Q9HC38_221	GLOD4	GLOD4_HUMAN Glyoxalase domain-containing protein 4 OS=Homo sapiens OX=9606 GN=GLOD4 PE=1 SV=1	|IAFSC(BTD[C])PQK	|1	|1.7	|NA	1.7	NA	1	1
P05023	606	P05023_606	ATP1A1	AT1A1_HUMAN Sodium/potassium-transporting ATPase subunit alpha-1 OS=Homo sapiens OX=9606 GN=ATP1A1 PE=1 SV=1	AAVPDAVGKC(BTD[C])R|AAVPDAVGKC(BTD[C])R	3|1	1.55|1.84	0.31177|NA	1.695	0.20506	4	2
Q9UPN3	5930	Q9UPN3_5930	MACF1	MACF1_HUMAN Microtubule-actin cross-linking factor 1, isoforms 1/2/3/5 OS=Homo sapiens OX=9606 GN=MACF1 PE=1 SV=4	IREC(BTD[C])ISDNK|IREC(BTD[C])ISDNK	1|1	1.8|1.59	NA|NA	1.695	0.14849	2	2
Q9Y5Y2	72	Q9Y5Y2_72	NUBP2	NUBP2_HUMAN Cytosolic Fe-S cluster assembly factor NUBP2 OS=Homo sapiens OX=9606 GN=NUBP2 PE=1 SV=1	AVHQC(BTD[C])DR|AVHQC(BTD[C])DR	1|1	1.88|1.51	NA|NA	1.695	0.26163	2	2
O60264	259	O60264_259	SMARCA5	SMCA5_HUMAN SWI/SNF-related matrix-associated actin-dependent regulator of chromatin subfamily A member 5 OS=Homo sapiens OX=9606 GN=SMARCA5 PE=1 SV=1	|SVC(BTD[C])LIGDK	|1	|1.69	|NA	1.69	NA	1	1
P02545	522	P02545_522	LMNA	LMNA_HUMAN Prelamin-A/C OS=Homo sapiens OX=9606 GN=LMNA PE=1 SV=1	AQNTWGC(BTD[C])GNSLR|AQNTWGC(BTD[C])GNSLR	3|3	1.67|1.71	0.03464|0.03464	1.69	0.02828	6	2
P62191	58	P62191_58	PSMC1	PRS4_HUMAN 26S proteasome regulatory subunit 4 OS=Homo sapiens OX=9606 GN=PSMC1 PE=1 SV=1	|LPLVTPHTQC(BTD[C])R	|1	|1.69	|NA	1.69	NA	1	1
Q2TAY7	383	Q2TAY7_383	SMU1	SMU1_HUMAN WD40 repeat-containing protein SMU1 OS=Homo sapiens OX=9606 GN=SMU1 PE=1 SV=2	TTEC(BTD[C])SNTFK|	3|	1.69|	0.0|	1.69	NA	3	1
Q5TAQ9	256	Q5TAQ9_256	DCAF8	DCAF8_HUMAN DDB1- and CUL4-associated factor 8 OS=Homo sapiens OX=9606 GN=DCAF8 PE=1 SV=1	|LAMC(BTD[C])AR	|3	|1.69	|0.60575	1.69	NA	3	1
Q8ND24	655	Q8ND24_655	RNF214	RN214_HUMAN RING finger protein 214 OS=Homo sapiens OX=9606 GN=RNF214 PE=1 SV=2	SSHAPATC(BTD[C])K|	1|	1.69|	NA|	1.69	NA	1	1
Q92616	932	Q92616_932	GCN1	GCN1_HUMAN eIF-2-alpha kinase activator GCN1 OS=Homo sapiens OX=9606 GN=GCN1 PE=1 SV=6	|LLKPEC(BTD[C])VLDK	|1	|1.69	|NA	1.69	NA	1	1
O75390	211	O75390_211	CS	CISY_HUMAN Citrate synthase, mitochondrial OS=Homo sapiens OX=9606 GN=CS PE=1 SV=2	LPC(BTD[C])VAAK|LPC(BTD[C])VAAK	2|2	1.68|1.69	0.0|0.0	1.685	0.00707	4	2
[truncated: 999 more rows]

## Sheet: SOH matrix
Uniprot Accession #	Site	Genename	Genename_site	Description	Modified sequences	3a	3b
[truncated: 2,335 more rows]

## Sheet: 1
Uniprot Accession #	Site	Genename	Genename_site	Description	Modified sequences	Spectrum count	All ratio	All SD Ratio	RH/L	Ratio SD	Total spectrum count	Repeat counts
[truncated: 4,361 more rows]

[truncated: 4 more sheets: 2, SH matrix, Total matrix, 4]
