# Supplementary material for: Nucleophilic covalent ligand discovery for the cysteine redoxome
Source: Research Square preprint supplement (doi:10.21203/rs.3.rs-1765196/v1), 2022-06-23
Supplement: Supplementary file 6 [file bd31b34de4ad5984a2814d3a.xlsx]

## Sheet: Legend
Supplementary Data 4. Correlation of sulfenylome reactivity of each fragment with the corresponding structural features and kinetic parameters, including number of free NH , molecular weight (MW, ), CLogP value, the observed binding constant (kobs) and reaction rate constant (M-1S-1).

## Sheet: Sheet1
#Note	#Free NH	MW	CLogP	kobs (min-1)	M-1s-1	Reactivity
3a	1	296.17	2.84218	1.19	19.83	0
3b	1	316.16	2.88298	0.27	4.5	1.3468
5a	0	242.2	1.6504	0.25	4.17	2.71285
5b	1	262.19	1.6912	N.D.	N.D.	21.8502
6a	0	262.31	0.2744	0.25	4.17	0.0716076
6b	0	280.23	0.3152	0.43	7.17	7.44777
7a	1	198.27	0.8944	N.D.	N.D.	0.324675
7b	1	218.26	0.9352	N.D.	N.D.	1.05668
8a	1	218.3	1.2716	N.D.	N.D.	0.0473037
8b	1	238.29	1.3124	0.26	4.33	1.54959
9a	1	160.18	0.4676	0.1	1.67	0
9b	1	180.16	0.5084	0.18	3	2.67782
11a	0	242.32	2.7038	0.74	12.33	0.0541712
11b	0	262.31	2.7446	0.97	16.17	0.143885
12a	1	220.23	0.56774	0.15	2.5	0
12b	1	240.22	0.60854	0.12	2	0.0598444
13a	1	236.27	2.3556	0.22	3.67	0.0882613
13b	1	256.26	2.3964	0.14	2.33	0.601604
14a	0	152.2	-0.0435997	0.08	1.33	0
14b	0	172.18	-0.0027999	0.36	6	0.286328
15a	1	204.19	0.52474	0.06	1	0.143781
15b	1	224.17	0.565539	0.14	2.33	0.219901
16a	1	227.27	0.6996	0.05	0.83	0.0896057
16b	1	247.25	0.7404	0.15	2.5	0.0527983
17a	1	267.13	2.5862	0.16	2.67	0.349854
17b	1	287.11	2.627	0.19	3.17	0
18a	0	334.42	1.5744	0.12	2	0
18b	0	354.41	1.6152	0.57	9.5	0.0522466
19a	0	242.32	1.8934	0.2	3.33	0.634371
19b	0	262.31	1.9342	0.46	7.67	0.136426
20a	0	280.33	-0.5212	0.15	2.5	0.0888626
20b	0	300.32	-0.4804	0.35	5.83	0.0592768
21a	0	287.29	0.756425	0.27	4.5	0.0283366
21b	0	307.28	0.797225	0.36	6	0.455789
22a	0	230.27	1.2558	1.28	21.33	0.0399361
22b	0	250.25	1.2966	0.43	7.17	0
23a	0	214.27	1.8558	0.97	16.17	0
23b	0	243.26	1.8966	0.87	14.5	0.170843
24a	1	234.26	0.5818	N.D.	N.D.	0.0619195
24b	1	254.24	0.622599	0.16	2.67	0.475737
25a	1	197.24	-0.7851	N.D.	N.D.	0
25b	1	217.23	-0.7443	N.D.	N.D.	0.721311
26a	0	265.11	1.7908	0.91	15.17	0.742459
26b	0	285.1	1.8316	0.26	4.33	0.0570125
27a	0	315.17	2.5068	0.22	3.67	0
27b	0	335.16	2.5476	1.97	32.83	0.704676
28a	0	333.44	2.5188	N.D.	-	0
28b	0	353.42	2.5596	0.86	14.33	0.40568
29a	0	326.42	3.5482	N.D.	N.D.	0.0529801
29b	0	346.4	3.589	N.D.	N.D.	0.872727
30a	0	347.42	1.1498	2	33.3	0.0577701
30b	0	367.41	1.1906	N.D.	N.D.	0.0666667
31	0	188.25	0.3644	0.3	5	0.15444
32	0	112.13	-0.9578	0.1	1.67	0
33	0	154.17	-0.8376	0.14	2.33	0
34	0	195.27	0.5614	0.16	2.67	0
35	1	207.23	0.8476	>13	217	0.149477
36	1	310.37	0.23965	0.52	8.67	0.0513875
37	1	211.22	0.9756	0.24	4	0.14652
38	0	387.29	2.6458	N.D.	N.D.	0.0551268
39	0	411.38	3.8608	N.D.	N.D.	0.0828958
40	1	272.18	1.69889	0.07	1.17	0.122137
41	1	234.26	0.87674	-	-	0.0925069
42	0	307.31	1.4512	0.57	9.5	0.0572082
43	0	363.41	2.2586	N.D.	N.D.	0.176991
