# Supplementary material for: Nucleophilic covalent ligand discovery for the cysteine redoxome
Source: Research Square preprint supplement (doi:10.21203/rs.3.rs-1765196/v1), 2022-06-23
Supplement: Supplementary file 7 [file cdb87a3c8562a52c83399490.xlsx]

## Sheet: Legend
Supplementary Data 3. Global profiling of sulfenic acid ligandability in the human proteome. The protein lysates from MDA-MB-231 cells were firstly labeled with 0 or 2mM fragment, and then labeled with 5mM BTD, and finally subjected to tryptic digestion. The resulting BTD-modified peptides were further conjugated to light and heavy azido biotin reagents with a photocleavable linker (Az-UV-biotin)…

## Sheet: Sulfenic acid ligandability 
Uniprot Accession #	Site	Genename	Description	Modified sequences	3a	5a	6a	7a	8a	9a	11a	12a	13a	14a	15a	16a	17a	18a	19a	20a	21a	22a	23a	24a	25a	26a	27a	28a	29a	30a	3b	5b	6b	7b	8b	9b	11b	12b	13b	14b	15b	16b	17b	18b	19b	20b	21b	22b	23b
A0A0B4J2D5	153	GATD3B	GAL3B_HUMAN Glutamine amidotransferase-like class 1 domain-containing protein 3B, mitochondrial OS=Homo sapiens OX=9606 GN=GATD3B PE=1 SV=1	NLSTFAVDGKDC(BTD[C])K|	0.48	NA	NA	NA	NA	0.82	NA	NA	1.25	NA	NA	NA	NA	NA	NA	NA	NA	NA	NA	NA	NA	NA	NA	1.11	0.95	1	NA	NA	NA	NA	NA	NA	NA	NA	NA	NA	NA	NA	NA	NA	NA	NA	NA	NA	NA
A0AVT1	682	UBA6	UBA6_HUMAN Ubiquitin-like modifier-activating enzyme 6 OS=Homo sapiens OX=9606 GN=UBA6 PE=1 SV=1	IQSGHSLEGC(BTD[C])FQVIK|	NA	1.04	NA	0.54	NA	NA	0.97	1.1	NA	0.65	0.85	NA	NA	NA	NA	NA	0.77	1.1	NA	NA	NA	NA	NA	1.19	0.95	NA	NA	NA	NA	0.47	0.45	NA	0.99	0.9	0.8	NA	1.21	NA	NA	NA	NA	NA	NA	NA	NA
A0AVT1	178	UBA6	UBA6_HUMAN Ubiquitin-like modifier-activating enzyme 6 OS=Homo sapiens OX=9606 GN=UBA6 PE=1 SV=1	SQC(BTD[C])PPIK|SQC(BTD[C])PPIK	NA	NA	1.12	NA	NA	1.29	NA	0.41	1.03	NA	NA	0.87	NA	1.02	0.64	0.77	0.79	NA	NA	NA	1.01	2.12	NA	NA	NA	NA	0.77	NA	NA	NA	1.12	NA	NA	1.12	NA	0.79	1.25	NA	NA	NA	NA	NA	NA	NA	NA
A0AVT1	347	UBA6	UBA6_HUMAN Ubiquitin-like modifier-activating enzyme 6 OS=Homo sapiens OX=9606 GN=UBA6 PE=1 SV=1	|KPNVGC(BTD[C])QQDSEELLK	NA	NA	0.8	0.86	0.37	1.36	0.53	0.47	1.11	NA	NA	0.92	NA	0.84	1.27	1.04	0.78	1.04	0.86	NA	0.99	NA	0.59	1.08	1	NA	1.26	9.62	3.65	1.06	1.14	1.34	1.09	0.74	1.21	0.84	0.69	0.99	0.92	0.91	0.77	0.94	1.44	1	0.77
A0AVT1	174	UBA6	UBA6_HUMAN Ubiquitin-like modifier-activating enzyme 6 OS=Homo sapiens OX=9606 GN=UBA6 PE=1 SV=1	INDFC(BTD[C])R|INDFC(BTD[C])R	NA	3.36	1.22	NA	NA	NA	NA	NA	1.39	NA	NA	NA	0.78	NA	NA	1.22	NA	1.45	NA	0.72	1.18	2.38	NA	NA	1.03	NA	2.75	NA	NA	NA	NA	NA	NA	NA	NA	NA	NA	NA	NA	NA	NA	NA	NA	NA	NA
A0AVT1	156	UBA6	UBA6_HUMAN Ubiquitin-like modifier-activating enzyme 6 OS=Homo sapiens OX=9606 GN=UBA6 PE=1 SV=1	YQC(BTD[C])VVLTEMK|	NA	NA	1.12	NA	NA	NA	NA	0.87	NA	NA	NA	NA	NA	NA	NA	NA	0.83	NA	NA	NA	NA	NA	NA	NA	NA	0.76	NA	NA	NA	NA	NA	NA	NA	NA	NA	NA	NA	NA	NA	NA	NA	NA	NA	NA	NA
A0AVT1	625	UBA6	UBA6_HUMAN Ubiquitin-like modifier-activating enzyme 6 OS=Homo sapiens OX=9606 GN=UBA6 PE=1 SV=1	DPPEEEIPFC(BTD[C])TLK|	NA	NA	NA	NA	0.92	NA	NA	0.86	NA	NA	NA	NA	NA	NA	NA	NA	NA	NA	NA	NA	NA	NA	NA	NA	NA	NA	NA	NA	NA	NA	NA	NA	NA	NA	NA	NA	NA	NA	NA	NA	NA	NA	NA	NA	NA
A0AVT1	449	UBA6	UBA6_HUMAN Ubiquitin-like modifier-activating enzyme 6 OS=Homo sapiens OX=9606 GN=UBA6 PE=1 SV=1	AC(BTD[C])IGDTLCQK|	NA	NA	NA	NA	NA	NA	NA	NA	NA	NA	NA	NA	0.78	NA	NA	NA	NA	NA	1.08	NA	NA	NA	NA	NA	NA	NA	NA	NA	NA	NA	NA	NA	NA	NA	NA	NA	NA	NA	NA	NA	NA	NA	NA	NA	NA
A0AVT1	455	UBA6	UBA6_HUMAN Ubiquitin-like modifier-activating enzyme 6 OS=Homo sapiens OX=9606 GN=UBA6 PE=1 SV=1	|ACIGDTLC(BTD[C])QK	NA	NA	NA	NA	NA	NA	NA	NA	NA	NA	NA	NA	0.59	NA	NA	NA	NA	NA	NA	NA	NA	NA	NA	NA	0.97	1.08	NA	NA	NA	NA	NA	NA	NA	NA	NA	NA	NA	NA	NA	NA	NA	NA	NA	NA	NA
A0AVT1	699	UBA6	UBA6_HUMAN Ubiquitin-like modifier-activating enzyme 6 OS=Homo sapiens OX=9606 GN=UBA6 PE=1 SV=1	NWSQC(BTD[C])VELAR|	NA	NA	NA	NA	NA	NA	NA	NA	NA	NA	NA	NA	NA	NA	NA	NA	1.21	NA	NA	NA	NA	NA	NA	NA	0.99	NA	NA	NA	NA	NA	NA	NA	NA	NA	NA	NA	NA	NA	NA	NA	NA	NA	NA	NA	NA
A0JLT2	163	MED19	MED19_HUMAN Mediator of RNA polymerase II transcription subunit 19 OS=Homo sapiens OX=9606 GN=MED19 PE=1 SV=2	LHTGPLPEQC(BTD[C])R|	NA	2.36	NA	NA	0.48	1.45	NA	NA	NA	NA	NA	NA	NA	NA	NA	NA	NA	NA	NA	NA	NA	2.42	NA	1.18	NA	0.78	NA	NA	NA	NA	NA	NA	NA	NA	NA	NA	NA	NA	NA	NA	NA	NA	NA	NA	NA
A0MZ66	550	SHTN1	SHOT1_HUMAN Shootin-1 OS=Homo sapiens OX=9606 GN=SHTN1 PE=1 SV=4	KLEGC(BTD[C])TSSK|KLEGC(BTD[C])TSSK	NA	NA	NA	NA	NA	NA	NA	NA	NA	NA	NA	NA	NA	NA	NA	NA	NA	NA	NA	NA	NA	NA	NA	NA	NA	NA	NA	NA	NA	NA	NA	NA	NA	0.91	1.21	NA	NA	NA	NA	NA	NA	NA	NA	NA	NA
A0MZ66	203	SHTN1	SHOT1_HUMAN Shootin-1 OS=Homo sapiens OX=9606 GN=SHTN1 PE=1 SV=4	VLEKC(BTD[C])NR|	NA	NA	NA	NA	NA	1.32	NA	NA	NA	NA	NA	NA	NA	NA	NA	NA	NA	NA	NA	NA	NA	2.72	NA	NA	NA	NA	1.47	NA	NA	NA	NA	NA	NA	NA	NA	NA	NA	NA	NA	NA	NA	NA	NA	NA	NA
A1L0T0	176	ILVBL	ILVBL_HUMAN Acetolactate synthase-like protein OS=Homo sapiens OX=9606 GN=ILVBL PE=1 SV=2	FC(BTD[C])VSVR|	NA	1.74	1.43	NA	0.99	NA	1	NA	NA	0.78	0.87	1.38	NA	NA	NA	1.25	0.95	1.7	1.36	1.01	1.18	1.8	NA	NA	1.05	NA	NA	0.81	NA	NA	0.84	NA	NA	NA	NA	NA	NA	NA	NA	0.36	NA	NA	0.57	0.64	0.37
A1L0T0	608	ILVBL	ILVBL_HUMAN Acetolactate synthase-like protein OS=Homo sapiens OX=9606 GN=ILVBL PE=1 SV=2	VLHDAQQQC(BTD[C])R|VLHDAQQQC(BTD[C])R	0.79	2.88	0.85	NA	0.44	1.56	0.62	0.57	1.01	NA	0.69	1	0.64	NA	1.74	0.94	0.65	1.15	0.62	0.6	1.02	2.5	1.15	0.91	0.77	1.16	1.54	0.43	3.3	0.3	NA	2.01	1.01	1.07	1.47	NA	0.45	0.58	1.27	1.04	1.03	0.31	NA	0.6	0.84
A1L0T0	568	ILVBL	ILVBL_HUMAN Acetolactate synthase-like protein OS=Homo sapiens OX=9606 GN=ILVBL PE=1 SV=2	EQVPSLGSNVAC(BTD[C])GLAYTDYHK|	NA	NA	NA	0.95	NA	NA	NA	NA	NA	NA	NA	NA	NA	NA	NA	0.99	NA	NA	NA	NA	1.38	NA	NA	0.9	NA	0.82	NA	NA	NA	NA	NA	NA	NA	NA	NA	0.58	NA	NA	NA	NA	NA	NA	NA	NA	NA
A1L0T0	276	ILVBL	ILVBL_HUMAN Acetolactate synthase-like protein OS=Homo sapiens OX=9606 GN=ILVBL PE=1 SV=2	C(BTD[C])VEILSR|	NA	NA	NA	NA	NA	NA	NA	NA	NA	NA	NA	NA	NA	NA	NA	1.52	NA	NA	NA	NA	NA	NA	NA	NA	NA	NA	NA	NA	NA	NA	NA	NA	NA	NA	NA	NA	NA	NA	NA	NA	NA	NA	NA	NA	NA
A1L157	208	TSPAN11	TSN11_HUMAN Tetraspanin-11 OS=Homo sapiens OX=9606 GN=TSPAN11 PE=2 SV=2	VEGGC(BTD[C])ITK|	NA	NA	NA	NA	NA	NA	NA	NA	NA	NA	NA	NA	NA	NA	0.85	NA	NA	NA	NA	NA	NA	NA	NA	NA	NA	NA	NA	NA	NA	NA	NA	NA	NA	NA	NA	NA	NA	NA	NA	NA	NA	NA	NA	NA	NA
A2RRP1	1634	NBAS	NBAS_HUMAN Neuroblastoma-amplified sequence OS=Homo sapiens OX=9606 GN=NBAS PE=1 SV=2	|QLHC(BTD[C])YNER	NA	NA	NA	NA	NA	1.25	NA	NA	0.88	NA	NA	NA	NA	NA	NA	NA	NA	NA	NA	NA	NA	NA	NA	NA	NA	NA	0.82	NA	NA	NA	NA	NA	NA	NA	1.26	NA	NA	NA	NA	NA	NA	NA	NA	NA	NA
A2RRP1	1589	NBAS	NBAS_HUMAN Neuroblastoma-amplified sequence OS=Homo sapiens OX=9606 GN=NBAS PE=1 SV=2	LAPC(BTD[C])FR|	NA	NA	1.11	NA	NA	NA	NA	NA	NA	NA	NA	NA	NA	NA	NA	NA	NA	NA	NA	NA	NA	NA	NA	NA	NA	NA	NA	NA	NA	NA	NA	NA	NA	NA	NA	NA	NA	NA	NA	NA	NA	NA	NA	NA	NA
A2VEC9	156	SSPO	SSPO_HUMAN SCO-spondin OS=Homo sapiens OX=9606 GN=SSPO PE=2 SV=2	|SSQAC(BTD[C])R	NA	NA	NA	NA	NA	NA	NA	NA	1.03	NA	NA	0.96	NA	NA	NA	NA	NA	0.84	NA	NA	0.85	NA	NA	NA	0.84	1.1	1.61	NA	NA	NA	NA	NA	NA	NA	NA	NA	NA	NA	NA	NA	NA	NA	NA	NA	NA
A3KN83	445	SBNO1	SBNO1_HUMAN Protein strawberry notch homolog 1 OS=Homo sapiens OX=9606 GN=SBNO1 PE=1 SV=1	NLC(BTD[C])PVGSSKPTK|NLC(BTD[C])PVGSSKPTK	0.3	NA	0.7	NA	NA	NA	0.42	0.33	NA	0.67	NA	1.31	NA	0.96	1.43	0.86	0.63	0.76	NA	NA	NA	2.34	0.34	NA	0.74	0.86	1.02	NA	NA	1.2	NA	NA	1.04	NA	1.13	NA	0.96	NA	0.94	NA	NA	NA	NA	NA	0.68
A3KN83	605	SBNO1	SBNO1_HUMAN Protein strawberry notch homolog 1 OS=Homo sapiens OX=9606 GN=SBNO1 PE=1 SV=1	|YLC(BTD[C])IASK	NA	NA	NA	NA	NA	1.21	NA	NA	NA	NA	NA	NA	NA	NA	NA	NA	0.61	NA	NA	NA	NA	NA	NA	NA	1.03	NA	NA	NA	NA	NA	NA	NA	NA	NA	NA	NA	NA	NA	NA	NA	NA	NA	NA	NA	NA
A3KN83	699	SBNO1	SBNO1_HUMAN Protein strawberry notch homolog 1 OS=Homo sapiens OX=9606 GN=SBNO1 PE=1 SV=1	|DSPC(BTD[C])KENK	NA	NA	NA	NA	NA	NA	NA	NA	NA	NA	NA	NA	NA	NA	NA	NA	NA	NA	NA	NA	NA	NA	NA	NA	NA	NA	NA	NA	NA	1.02	NA	NA	NA	NA	1.64	NA	1.05	NA	NA	NA	NA	NA	NA	NA	NA
A4D1E9	167	GTPBP10	GTPBA_HUMAN GTP-binding protein 10 OS=Homo sapiens OX=9606 GN=GTPBP10 PE=1 SV=1	SSLLSC(BTD[C])VSHAK|	NA	NA	1.37	NA	NA	NA	NA	NA	NA	NA	NA	NA	NA	NA	NA	NA	NA	NA	NA	NA	NA	NA	NA	0.64	0.8	NA	NA	NA	NA	NA	NA	NA	NA	NA	NA	NA	NA	NA	NA	NA	NA	NA	NA	NA	NA
A5YKK6	890	CNOT1	CNOT1_HUMAN CCR4-NOT transcription complex subunit 1 OS=Homo sapiens OX=9606 GN=CNOT1 PE=1 SV=2	|EVFNC(BTD[C])MLR	NA	2.16	NA	NA	NA	NA	NA	NA	NA	NA	NA	1.19	NA	NA	NA	1.06	0.94	NA	NA	NA	1.29	0.95	NA	0.87	1.11	1.21	NA	NA	NA	NA	NA	NA	NA	NA	NA	NA	NA	NA	NA	NA	NA	NA	NA	NA	NA
A5YKK6	1420	CNOT1	CNOT1_HUMAN CCR4-NOT transcription complex subunit 1 OS=Homo sapiens OX=9606 GN=CNOT1 PE=1 SV=2	IAMTTC(BTD[C])EQIVR|	NA	NA	NA	NA	NA	NA	NA	NA	NA	NA	NA	NA	NA	NA	NA	NA	NA	NA	NA	NA	NA	NA	NA	NA	1.2	0.9	NA	NA	NA	NA	NA	NA	NA	NA	NA	NA	NA	NA	NA	NA	NA	NA	NA	NA	NA
A6NC57	482	ANKRD62	ANR62_HUMAN Ankyrin repeat domain-containing protein 62 OS=Homo sapiens OX=9606 GN=ANKRD62 PE=2 SV=4	|KLC(BTD[C])NLR	NA	NA	NA	NA	NA	NA	NA	NA	NA	NA	NA	NA	NA	NA	NA	NA	NA	NA	NA	NA	NA	NA	NA	NA	NA	NA	NA	NA	NA	NA	NA	NA	NA	NA	NA	NA	NA	NA	NA	NA	NA	NA	NA	NA	NA
A6NDG6	297	PGP	PGP_HUMAN Glycerol-3-phosphate phosphatase OS=Homo sapiens OX=9606 GN=PGP PE=1 SV=1	NNQESDC(BTD[C])VSK|	NA	NA	NA	NA	NA	NA	NA	NA	NA	NA	NA	0.95	NA	NA	NA	0.91	0.79	NA	NA	NA	1	NA	NA	1	0.81	0.94	NA	NA	NA	NA	NA	NA	0.95	NA	NA	NA	NA	1.37	NA	NA	NA	NA	NA	NA	NA
A6NDG6	217	PGP	PGP_HUMAN Glycerol-3-phosphate phosphatase OS=Homo sapiens OX=9606 GN=PGP PE=1 SV=1	FIAGTGC(BTD[C])LVR|	NA	NA	NA	0.49	NA	NA	NA	NA	NA	NA	0.61	1.45	0.84	NA	NA	0.87	1.45	NA	0.8	NA	NA	NA	NA	NA	NA	NA	NA	NA	NA	NA	NA	NA	NA	NA	NA	NA	NA	NA	NA	NA	NA	NA	NA	NA	NA
A6NDY0	180	PABPN1L	EPAB2_HUMAN Embryonic polyadenylate-binding protein 2 OS=Homo sapiens OX=9606 GN=PABPN1L PE=2 SV=1	|VTILC(BTD[C])DK	NA	2.11	0.8	NA	NA	0.95	1.06	0.9	1.03	NA	NA	NA	NA	NA	1.14	NA	NA	NA	NA	NA	NA	2.19	NA	NA	0.75	0.95	1.7	NA	NA	0.22	NA	NA	NA	NA	NA	NA	1.21	NA	NA	NA	NA	NA	NA	NA	NA
A6NED2	139	RCCD1	RCCD1_HUMAN RCC1 domain-containing protein 1 OS=Homo sapiens OX=9606 GN=RCCD1 PE=1 SV=1	LPLLPC(BTD[C])AR|LPLLPC(BTD[C])AR	NA	NA	NA	NA	NA	NA	NA	NA	NA	NA	NA	NA	NA	0.91	NA	NA	0.45	1.4	NA	NA	NA	NA	NA	0.26	NA	0.74	NA	NA	NA	NA	NA	NA	NA	NA	NA	NA	NA	NA	1.08	NA	NA	NA	NA	NA	NA
A6NED2	42	RCCD1	RCCD1_HUMAN RCC1 domain-containing protein 1 OS=Homo sapiens OX=9606 GN=RCCD1 PE=1 SV=1	|AGVDIC(BTD[C])R	NA	NA	NA	NA	NA	NA	NA	NA	NA	NA	NA	NA	NA	NA	NA	NA	1.05	NA	NA	NA	0.69	NA	NA	NA	NA	NA	NA	NA	NA	NA	NA	NA	NA	NA	NA	NA	NA	NA	NA	NA	NA	NA	NA	NA	NA
A6NFX1	42	MFSD2B	MFS2B_HUMAN Major facilitator superfamily domain-containing protein 2B OS=Homo sapiens OX=9606 GN=MFSD2B PE=1 SV=4	LSFC(BTD[C])TK|	NA	4.37	NA	NA	NA	NA	NA	NA	NA	NA	NA	2.48	NA	NA	NA	2.75	1.24	NA	NA	NA	NA	3.41	NA	NA	NA	1.71	NA	NA	NA	NA	NA	NA	NA	NA	NA	NA	NA	NA	NA	NA	NA	NA	NA	NA	NA
A6NHR9	1856	SMCHD1	SMHD1_HUMAN Structural maintenance of chromosomes flexible hinge domain-containing protein 1 OS=Homo sapiens OX=9606 GN=SMCHD1 PE=1 SV=2	ITHC(BTD[C])PTLLTR|	NA	1.39	1.04	0.27	0.62	1.26	0.68	0.9	1.06	0.41	0.77	0.95	0.83	NA	NA	0.93	0.59	1.14	NA	NA	0.98	1.67	0.86	NA	0.99	1.01	1.92	NA	NA	NA	NA	NA	NA	NA	1.16	NA	0.79	NA	NA	0.57	NA	0.44	NA	NA	0.86
A6NHR9	1433	SMCHD1	SMHD1_HUMAN Structural maintenance of chromosomes flexible hinge domain-containing protein 1 OS=Homo sapiens OX=9606 GN=SMCHD1 PE=1 SV=2	LSTSGNRPPANAETFSC(BTD[C])NK|LSTSGNRPPANAETFSC(BTD[C])NK	NA	2.35	1.04	NA	NA	1.3	0.65	NA	0.84	NA	NA	0.97	NA	NA	0.98	1.08	0.7	0.94	NA	NA	0.99	1.75	NA	0.91	0.67	1.02	NA	NA	NA	NA	NA	NA	0.92	0.76	0.98	NA	0.77	1.12	0.8	NA	NA	0.62	NA	NA	NA
A6NHR9	897	SMCHD1	SMHD1_HUMAN Structural maintenance of chromosomes flexible hinge domain-containing protein 1 OS=Homo sapiens OX=9606 GN=SMCHD1 PE=1 SV=2	GPVNSC(BTD[C])QGK|GPVNSC(BTD[C])QGK	NA	2.57	0.8	0.66	NA	1.17	NA	NA	0.85	NA	NA	NA	0.84	1.1	NA	1.06	0.68	0.9	0.81	0.67	0.83	NA	0.61	0.81	0.65	0.8	1.16	7.38	2.42	0.99	2.73	2.06	1.34	NA	NA	0.94	NA	0.86	1.2	NA	0.87	0.79	NA	NA	0.8
A6NHR9	1018	SMCHD1	SMHD1_HUMAN Structural maintenance of chromosomes flexible hinge domain-containing protein 1 OS=Homo sapiens OX=9606 GN=SMCHD1 PE=1 SV=2	IEIPSC(BTD[C])K|	NA	0.39	NA	NA	NA	NA	NA	NA	0.33	NA	NA	0.32	NA	NA	1.72	NA	0.95	1.53	NA	NA	0.36	0.35	NA	0.61	0.5	NA	NA	NA	NA	NA	NA	NA	NA	NA	NA	NA	NA	NA	1.33	NA	NA	NA	NA	NA	NA
A6NHR9	1710	SMCHD1	SMHD1_HUMAN Structural maintenance of chromosomes flexible hinge domain-containing protein 1 OS=Homo sapiens OX=9606 GN=SMCHD1 PE=1 SV=2	|RSC(BTD[C])TLPNYTK	NA	NA	NA	NA	NA	NA	0.73	NA	NA	NA	NA	NA	NA	NA	NA	NA	NA	NA	NA	NA	NA	NA	NA	NA	NA	NA	NA	NA	NA	NA	NA	NA	NA	NA	NA	NA	NA	NA	NA	NA	NA	NA	NA	NA	NA
A6NHR9	1967	SMCHD1	SMHD1_HUMAN Structural maintenance of chromosomes flexible hinge domain-containing protein 1 OS=Homo sapiens OX=9606 GN=SMCHD1 PE=1 SV=2	KC(BTD[C])NDSLR|KC(BTD[C])NDSLR	0.42	NA	NA	NA	0.39	NA	NA	0.42	NA	NA	NA	NA	NA	NA	1.33	NA	NA	NA	NA	NA	NA	NA	NA	NA	NA	NA	NA	NA	NA	NA	NA	NA	NA	0.84	0.84	NA	1	NA	NA	0.67	NA	0.83	NA	0.88	0.76
A6NKF1	84	SAC3D1	SAC31_HUMAN SAC3 domain-containing protein 1 OS=Homo sapiens OX=9606 GN=SAC3D1 PE=1 SV=2	LEVVPGC(BTD[C])R|	NA	NA	NA	NA	NA	NA	NA	NA	NA	NA	NA	1.26	NA	NA	NA	NA	NA	NA	NA	NA	NA	NA	NA	NA	NA	NA	NA	NA	NA	NA	NA	NA	NA	NA	NA	NA	NA	NA	NA	NA	NA	NA	NA	NA	NA
A6NKH3	43	RPL37AP8	RL37L_HUMAN Putative 60S ribosomal protein L37a-like protein OS=Homo sapiens OX=9606 GN=RPL37AP8 PE=5 SV=2	YTCSFC(BTD[C])GK|YTCSFC(BTD[C])GK	NA	2.41	NA	NA	NA	NA	NA	NA	NA	NA	NA	NA	0.79	NA	NA	NA	NA	0.94	0.87	0.32	NA	1.57	NA	NA	NA	NA	1.44	NA	NA	NA	NA	NA	NA	NA	NA	NA	NA	NA	NA	NA	NA	1.03	NA	NA	NA
A6NKH3	40	RPL37AP8	RL37L_HUMAN Putative 60S ribosomal protein L37a-like protein OS=Homo sapiens OX=9606 GN=RPL37AP8 PE=5 SV=2	YTC(BTD[C])SFCGK|YTC(BTD[C])SFCGK	NA	2.05	NA	NA	NA	NA	NA	NA	NA	NA	NA	NA	1.7	NA	NA	NA	NA	0.87	1.09	0.62	NA	1.45	NA	NA	NA	NA	1.4	NA	NA	NA	NA	NA	NA	NA	NA	NA	NA	NA	NA	NA	NA	0.69	NA	0.74	NA
A6NNZ2	12	TUBB8B	TBB8B_HUMAN Tubulin beta 8B OS=Homo sapiens OX=9606 GN=TUBB8B PE=1 SV=1	|MREIVLTQTGQC(BTD[C])GNQIGAK	NA	NA	NA	NA	NA	NA	NA	NA	NA	NA	NA	NA	NA	NA	NA	NA	NA	NA	NA	NA	NA	NA	NA	NA	NA	NA	NA	NA	NA	NA	NA	NA	NA	NA	0.85	NA	1.17	NA	NA	NA	NA	NA	NA	NA	NA
A8K2U0	694	A2ML1	A2ML1_HUMAN Alpha-2-macroglobulin-like protein 1 OS=Homo sapiens OX=9606 GN=A2ML1 PE=1 SV=3	PVDC(BTD[C])SHR|	NA	NA	NA	NA	NA	1.3	NA	NA	NA	NA	NA	NA	NA	NA	NA	NA	NA	NA	NA	NA	NA	NA	NA	NA	NA	NA	NA	NA	NA	NA	NA	NA	NA	NA	NA	NA	NA	NA	NA	NA	NA	NA	NA	NA	NA
B2RPK0	23	HMGB1P1	HGB1A_HUMAN Putative high mobility group protein B1-like 1 OS=Homo sapiens OX=9606 GN=HMGB1P1 PE=5 SV=1	AFFVQTC(BTD[C])R|	NA	NA	NA	NA	NA	NA	NA	NA	NA	NA	NA	1.06	NA	NA	NA	NA	NA	NA	NA	NA	NA	NA	NA	NA	NA	NA	NA	NA	NA	NA	NA	NA	0.97	NA	NA	NA	NA	NA	NA	NA	NA	NA	NA	NA	NA
C9JRZ8	200	AKR1B15	AK1BF_HUMAN Aldo-keto reductase family 1 member B15 OS=Homo sapiens OX=9606 GN=AKR1B15 PE=1 SV=2	LIQYC(BTD[C])HSK|	NA	NA	NA	NA	NA	NA	NA	NA	NA	NA	NA	NA	NA	NA	NA	0.96	NA	NA	NA	NA	NA	NA	NA	NA	NA	NA	NA	NA	NA	NA	NA	NA	NA	NA	NA	NA	NA	NA	NA	NA	NA	NA	NA	NA	NA
C9JRZ8	187	AKR1B15	AK1BF_HUMAN Aldo-keto reductase family 1 member B15 OS=Homo sapiens OX=9606 GN=AKR1B15 PE=1 SV=2	|YKPVTNQVEC(BTD[C])HPYLTQEK	NA	NA	NA	NA	NA	NA	NA	NA	NA	NA	NA	NA	NA	NA	NA	1.02	NA	NA	NA	NA	NA	NA	NA	NA	NA	NA	NA	0.69	NA	NA	NA	NA	NA	NA	NA	NA	NA	NA	NA	NA	NA	NA	NA	NA	NA
E7EU14	47	PPP5D1	PP5D1_HUMAN Protein PPP5D1 OS=Homo sapiens OX=9606 GN=PPP5D1 PE=2 SV=2	YQEC(BTD[C])NK|	NA	NA	NA	NA	NA	NA	NA	NA	NA	NA	NA	NA	NA	NA	NA	NA	NA	NA	NA	NA	NA	NA	NA	NA	NA	NA	NA	NA	NA	NA	NA	NA	NA	NA	NA	NA	NA	NA	NA	NA	NA	NA	NA	NA	NA
F5H4B4	409	FAM227A	F227A_HUMAN Protein FAM227A OS=Homo sapiens OX=9606 GN=FAM227A PE=1 SV=1	|KSC(BTD[C])AACK	NA	NA	NA	NA	NA	NA	NA	NA	0.64	NA	NA	NA	NA	NA	NA	NA	NA	NA	NA	NA	NA	NA	NA	NA	NA	NA	NA	NA	NA	NA	NA	NA	NA	NA	NA	NA	NA	NA	NA	NA	NA	NA	NA	NA	NA
M0R2J8	458	DCDC1	DCDC1_HUMAN Doublecortin domain-containing protein 1 OS=Homo sapiens OX=9606 GN=DCDC1 PE=1 SV=1	|IGHLC(BTD[C])K	NA	NA	NA	NA	NA	NA	NA	NA	NA	NA	NA	NA	NA	NA	NA	NA	NA	NA	NA	NA	NA	NA	NA	NA	NA	1	NA	NA	NA	NA	NA	NA	NA	NA	NA	NA	NA	NA	NA	NA	NA	NA	NA	NA	NA
O00116	413	AGPS	ADAS_HUMAN Alkyldihydroxyacetonephosphate synthase, peroxisomal OS=Homo sapiens OX=9606 GN=AGPS PE=1 SV=1	|QRC(BTD[C])APASIR	0.38	2.8	NA	NA	NA	0.98	0.59	0.65	0.97	0.81	0.82	0.98	0.91	NA	1.69	0.98	0.72	1.15	NA	0.85	1.02	2.45	0.53	0.91	0.82	0.92	1.74	NA	NA	0.5	0.3	NA	NA	NA	3.74	0.32	0.4	NA	NA	NA	NA	NA	NA	NA	NA
O00116	349	AGPS	ADAS_HUMAN Alkyldihydroxyacetonephosphate synthase, peroxisomal OS=Homo sapiens OX=9606 GN=AGPS PE=1 SV=1	SC(BTD[C])QGPR|SC(BTD[C])QGPR	0.44	2.32	1.01	0.81	0.54	1.49	0.63	0.58	1.11	0.42	1.1	1.1	1.04	NA	1.12	0.97	0.86	0.98	NA	1.17	0.92	1.97	0.54	1.04	0.99	1	1.8	1.02	0.98	NA	NA	NA	NA	0.96	NA	NA	0.92	0.83	NA	0.73	0.78	0.81	NA	1.01	NA
O00116	541	AGPS	ADAS_HUMAN Alkyldihydroxyacetonephosphate synthase, peroxisomal OS=Homo sapiens OX=9606 GN=AGPS PE=1 SV=1	|VVDLC(BTD[C])R	0.54	1.62	0.99	0.54	NA	1.28	0.99	1.04	0.9	NA	0.92	1.24	0.8	NA	NA	1.2	0.65	1.21	0.91	0.5	1.12	0.98	0.59	1	0.94	1.22	3.37	NA	1.04	NA	NA	NA	NA	NA	1.46	NA	0.81	NA	NA	NA	0.42	0.35	1.18	0.97	0.73
O00116	552	AGPS	ADAS_HUMAN Alkyldihydroxyacetonephosphate synthase, peroxisomal OS=Homo sapiens OX=9606 GN=AGPS PE=1 SV=1	ITREC(BTD[C])K|	0.32	1.47	NA	NA	NA	1.73	NA	NA	0.98	NA	NA	0.98	NA	1.12	1.69	NA	0.74	0.99	NA	NA	0.84	NA	NA	NA	1.09	0.83	NA	NA	NA	0.23	0.14	2.2	NA	1	1.83	0.11	0.87	NA	NA	0.45	NA	0.4	NA	1	NA
O00116	226	AGPS	ADAS_HUMAN Alkyldihydroxyacetonephosphate synthase, peroxisomal OS=Homo sapiens OX=9606 GN=AGPS PE=1 SV=1	|IVNLAC(BTD[C])K	0.54	3.66	NA	0.42	NA	NA	0.62	0.52	1.11	NA	1.22	0.67	NA	NA	NA	NA	NA	1.02	NA	NA	0.77	NA	0.58	0.75	NA	0.89	1.72	NA	NA	NA	NA	1.64	1.03	0.93	NA	NA	NA	NA	NA	NA	0.75	NA	NA	0.71	NA
O00116	404	AGPS	ADAS_HUMAN Alkyldihydroxyacetonephosphate synthase, peroxisomal OS=Homo sapiens OX=9606 GN=AGPS PE=1 SV=1	YGSVAFPNFEQGVAC(BTD[C])LR|	NA	NA	NA	NA	NA	NA	NA	NA	NA	NA	NA	NA	NA	NA	NA	NA	NA	NA	NA	NA	NA	NA	NA	NA	NA	NA	NA	NA	NA	NA	NA	NA	NA	NA	NA	NA	NA	NA	NA	NA	0.7	NA	NA	NA	0.77
O00139	406	KIF2A	KIF2A_HUMAN Kinesin-like protein KIF2A OS=Homo sapiens OX=9606 GN=KIF2A PE=1 SV=3	EVKC(BTD[C])VEDVLK|	NA	NA	1.05	NA	NA	1.32	NA	NA	NA	NA	NA	0.91	NA	0.81	NA	1.13	0.81	1.1	NA	NA	0.94	1.44	NA	0.71	1.05	1.03	NA	NA	1.64	0.7	NA	1.72	1.04	0.69	NA	NA	NA	NA	NA	0.53	0.62	0.74	1.02	NA	NA
O00139	420	KIF2A	KIF2A_HUMAN Kinesin-like protein KIF2A OS=Homo sapiens OX=9606 GN=KIF2A PE=1 SV=3	LIDIGNSC(BTD[C])R|	NA	NA	NA	NA	NA	NA	NA	NA	0.51	NA	NA	NA	NA	NA	NA	NA	NA	NA	NA	NA	0.92	1.24	NA	0.96	0.85	1.09	NA	NA	NA	NA	NA	NA	NA	NA	NA	NA	NA	NA	NA	NA	NA	NA	NA	NA	NA
O00139	227	KIF2A	KIF2A_HUMAN Kinesin-like protein KIF2A OS=Homo sapiens OX=9606 GN=KIF2A PE=1 SV=3	ICVC(BTD[C])VR|	NA	NA	NA	NA	NA	NA	NA	NA	NA	NA	NA	NA	NA	NA	NA	NA	NA	NA	NA	NA	NA	NA	NA	NA	NA	NA	NA	NA	NA	NA	NA	NA	NA	NA	NA	NA	NA	NA	NA	NA	NA	NA	NA	NA	NA
O00139	225	KIF2A	KIF2A_HUMAN Kinesin-like protein KIF2A OS=Homo sapiens OX=9606 GN=KIF2A PE=1 SV=3	|IC(BTD[C])VCVR	NA	NA	NA	NA	NA	NA	NA	NA	NA	NA	NA	NA	NA	NA	NA	NA	NA	NA	NA	NA	NA	NA	NA	NA	NA	NA	NA	NA	NA	NA	NA	NA	NA	NA	NA	NA	NA	NA	NA	NA	NA	NA	NA	NA	NA
O00139	159	KIF2A	KIF2A_HUMAN Kinesin-like protein KIF2A OS=Homo sapiens OX=9606 GN=KIF2A PE=1 SV=3	|KSNC(BTD[C])VK	NA	NA	NA	NA	NA	NA	NA	NA	NA	NA	NA	NA	NA	NA	NA	NA	NA	NA	NA	NA	NA	NA	NA	NA	NA	NA	NA	NA	NA	0.9	NA	NA	NA	NA	NA	NA	NA	NA	NA	NA	NA	NA	NA	NA	NA
O00142	189	TK2	KITM_HUMAN Thymidine kinase 2, mitochondrial OS=Homo sapiens OX=9606 GN=TK2 PE=1 SV=4	|TNPETC(BTD[C])YQR	NA	NA	NA	NA	NA	NA	NA	NA	NA	NA	NA	NA	NA	NA	NA	NA	NA	NA	NA	NA	NA	NA	NA	NA	NA	NA	NA	NA	NA	NA	NA	NA	NA	NA	NA	NA	NA	NA	NA	NA	NA	NA	NA	NA	NA
O00148	238	DDX39A	DX39A_HUMAN ATP-dependent RNA helicase DDX39A OS=Homo sapiens OX=9606 GN=DDX39A PE=1 SV=2	DIRPVC(BTD[C])R|DIRPVC(BTD[C])R	0.45	2.55	0.81	0.55	0.46	1.21	0.6	0.53	0.97	0.55	0.95	0.78	0.87	0.97	1.27	0.86	0.86	0.9	NA	NA	0.95	2.68	0.48	0.88	0.73	1.06	1.4	13.81	2.95	0.65	1.1	2.1	1.22	0.81	0.97	NA	1.1	1.27	0.95	NA	0.9	0.91	1.87	1.12	1.02
O00148	164	DDX39A	DX39A_HUMAN ATP-dependent RNA helicase DDX39A OS=Homo sapiens OX=9606 GN=DDX39A PE=1 SV=2	KNC(BTD[C])PHVVVGTPGR NC(BTD[C])PHVVVGTPGR|	0.47	2.11	0.81	0.57	0.53	1.42	0.49	0.5	0.98	0.49	0.99	1.01	1.03	1.09	1.37	0.86	0.82	1.01	0.84	0.58	0.98	NA	0.58	0.96	0.74	0.99	1.24	NA	2.82	1.43	1.43	1.94	0.73	0.65	0.81	0.7	1.04	1.02	NA	0.86	0.75	0.99	NA	0.82	0.66
O00148	223	DDX39A	DX39A_HUMAN ATP-dependent RNA helicase DDX39A OS=Homo sapiens OX=9606 GN=DDX39A PE=1 SV=2	QC(BTD[C])MMFSATLSK|	NA	NA	NA	NA	NA	NA	NA	1.04	NA	NA	NA	NA	NA	NA	NA	NA	1.04	NA	NA	NA	NA	NA	NA	1.23	1.55	1.48	NA	NA	NA	NA	NA	NA	NA	NA	NA	NA	NA	NA	NA	NA	NA	NA	NA	NA	NA
O00148	197	DDX39A	DX39A_HUMAN ATP-dependent RNA helicase DDX39A OS=Homo sapiens OX=9606 GN=DDX39A PE=1 SV=2	HFVLDEC(BTD[C])DK|	NA	NA	1.09	NA	NA	NA	NA	NA	NA	NA	NA	NA	NA	NA	NA	NA	NA	NA	1.01	0.78	NA	1.73	NA	1.3	NA	3.16	NA	NA	NA	NA	NA	NA	NA	NA	NA	NA	0.98	NA	NA	NA	NA	NA	NA	NA	NA
O00151	73	PDLIM1	PDLI1_HUMAN PDZ and LIM domain protein 1 OS=Homo sapiens OX=9606 GN=PDLIM1 PE=1 SV=4	|GC(BTD[C])TDNLTLTVAR	NA	0.16	NA	NA	NA	NA	NA	NA	NA	NA	NA	NA	NA	NA	NA	1.16	NA	NA	NA	NA	NA	NA	NA	NA	NA	NA	NA	1.02	NA	NA	NA	3.78	NA	0.75	1.63	NA	0.61	0.8	1.11	NA	NA	NA	0.49	NA	0.55
O00151	260	PDLIM1	PDLI1_HUMAN PDZ and LIM domain protein 1 OS=Homo sapiens OX=9606 GN=PDLIM1 PE=1 SV=4	|LPMC(BTD[C])DK	NA	NA	NA	0.87	NA	NA	NA	NA	NA	NA	NA	NA	NA	NA	NA	NA	NA	NA	NA	NA	NA	NA	NA	NA	NA	1.08	NA	NA	NA	NA	NA	NA	NA	NA	NA	NA	NA	NA	NA	NA	NA	NA	NA	NA	NA
O00154	288	ACOT7	BACH_HUMAN Cytosolic acyl coenzyme A thioester hydrolase OS=Homo sapiens OX=9606 GN=ACOT7 PE=1 SV=3	|KGC(BTD[C])VITISGR	NA	1.81	1.03	0.38	0.66	NA	0.69	NA	NA	0.85	1.13	1.34	0.8	0.76	0.86	1.23	0.65	1.45	0.65	0.29	1.22	1.24	NA	1.01	0.91	1.41	3.39	NA	1.11	0.87	0.65	NA	0.92	0.65	1.31	0.65	1	0.61	NA	0.4	NA	NA	NA	0.7	0.49
O00154	92	ACOT7	BACH_HUMAN Cytosolic acyl coenzyme A thioester hydrolase OS=Homo sapiens OX=9606 GN=ACOT7 PE=1 SV=3	|HC(BTD[C])NSQNGER	0.33	NA	NA	0.54	0.34	1.34	0.56	NA	0.76	0.7	NA	0.71	NA	NA	1.34	1	0.64	0.99	0.99	NA	1.15	1.31	0.62	1.14	0.74	1.05	1.01	NA	NA	1.21	0.77	NA	NA	0.95	NA	0.68	0.97	NA	NA	NA	NA	NA	NA	NA	NA
O00154	100	ACOT7	BACH_HUMAN Cytosolic acyl coenzyme A thioester hydrolase OS=Homo sapiens OX=9606 GN=ACOT7 PE=1 SV=3	C(BTD[C])VAALAR|C(BTD[C])VAALAR	NA	NA	NA	NA	NA	NA	NA	NA	NA	NA	NA	NA	NA	NA	NA	NA	NA	NA	NA	NA	NA	NA	NA	NA	NA	NA	NA	NA	NA	NA	NA	NA	NA	NA	NA	NA	NA	NA	NA	NA	NA	NA	NA	NA	NA
O00159	625	MYO1C	MYO1C_HUMAN Unconventional myosin-Ic OS=Homo sapiens OX=9606 GN=MYO1C PE=1 SV=4	|C(BTD[C])IKPNDAK	0.55	NA	NA	NA	0.89	NA	NA	1.02	NA	0.68	NA	NA	NA	NA	NA	NA	NA	NA	NA	NA	NA	NA	1.01	NA	NA	NA	NA	NA	NA	NA	NA	NA	NA	NA	NA	NA	NA	NA	NA	0.62	NA	NA	NA	NA	NA
O00159	575	MYO1C	MYO1C_HUMAN Unconventional myosin-Ic OS=Homo sapiens OX=9606 GN=MYO1C PE=1 SV=4	|ETMC(BTD[C])SSK	NA	NA	1.09	0.72	0.58	1.37	NA	NA	0.87	0.62	NA	0.99	NA	NA	NA	1.04	0.57	NA	NA	NA	0.98	NA	0.54	0.79	0.89	0.98	1.21	NA	NA	NA	NA	NA	NA	NA	NA	NA	NA	NA	NA	NA	NA	NA	NA	NA	NA
O00159	585	MYO1C	MYO1C_HUMAN Unconventional myosin-Ic OS=Homo sapiens OX=9606 GN=MYO1C PE=1 SV=4	NPIMSQC(BTD[C])FDR|NPIMSQC(BTD[C])FDR	0.8	2.65	0.88	NA	0.54	0.93	0.97	0.83	NA	NA	NA	NA	NA	NA	NA	NA	0.92	0.62	NA	NA	0.98	NA	0.92	0.8	0.92	1	NA	NA	NA	NA	NA	NA	NA	NA	NA	NA	NA	0.96	NA	0.47	0.59	NA	NA	1.41	NA
O00159	480	MYO1C	MYO1C_HUMAN Unconventional myosin-Ic OS=Homo sapiens OX=9606 GN=MYO1C PE=1 SV=4	IIC(BTD[C])DLVEEK|	NA	1.85	NA	NA	NA	1.28	0.91	NA	1.05	NA	NA	NA	NA	NA	NA	NA	NA	1.24	NA	NA	NA	1.46	NA	NA	NA	NA	2.03	0.58	NA	NA	NA	NA	NA	NA	NA	NA	NA	0.98	NA	NA	NA	0.98	NA	0.82	0.63
O00170	208	AIP	AIP_HUMAN AH receptor-interacting protein OS=Homo sapiens OX=9606 GN=AIP PE=1 SV=2	YYDAIAC(BTD[C])LK|	NA	NA	NA	NA	NA	NA	NA	NA	NA	NA	NA	NA	NA	NA	NA	NA	NA	NA	NA	0.92	NA	NA	NA	NA	NA	NA	NA	NA	NA	NA	NA	NA	NA	NA	NA	NA	NA	NA	NA	NA	NA	NA	NA	NA	NA
O00186	26	STXBP3	STXB3_HUMAN Syntaxin-binding protein 3 OS=Homo sapiens OX=9606 GN=STXBP3 PE=1 SV=2	ATVFDDC(BTD[C])KK|	NA	NA	NA	NA	NA	NA	NA	NA	NA	NA	NA	1.04	NA	NA	NA	NA	NA	NA	NA	NA	NA	1.71	NA	NA	NA	NA	1.73	NA	NA	NA	NA	NA	NA	NA	NA	NA	NA	NA	NA	NA	NA	NA	NA	NA	0.61
O00186	557	STXBP3	STXB3_HUMAN Syntaxin-binding protein 3 OS=Homo sapiens OX=9606 GN=STXBP3 PE=1 SV=2	SC(BTD[C])EVIIGSTHVLTPK|	NA	NA	0.8	NA	NA	NA	NA	NA	NA	NA	NA	1.33	NA	NA	NA	1.19	1.05	NA	NA	NA	NA	1.37	NA	NA	NA	0.98	NA	NA	NA	NA	NA	NA	NA	NA	NA	NA	NA	NA	NA	NA	NA	NA	NA	NA	NA
O00186	402	STXBP3	STXB3_HUMAN Syntaxin-binding protein 3 OS=Homo sapiens OX=9606 GN=STXBP3 PE=1 SV=2	|NHDNC(BTD[C])DKIR	NA	NA	NA	NA	NA	NA	NA	0.41	NA	NA	NA	NA	NA	NA	2.37	NA	NA	NA	NA	NA	NA	NA	0.79	NA	NA	NA	NA	NA	NA	NA	NA	NA	NA	1.01	NA	NA	0.89	NA	NA	NA	NA	NA	NA	NA	NA
O00186	49	STXBP3	STXB3_HUMAN Syntaxin-binding protein 3 OS=Homo sapiens OX=9606 GN=STXBP3 PE=1 SV=2	LLASCC(BTD[C])K|LLASCC(BTD[C])K	NA	NA	NA	NA	NA	NA	NA	NA	NA	NA	NA	0.94	NA	NA	NA	NA	0.96	NA	NA	NA	0.85	NA	NA	1.12	NA	0.88	NA	NA	NA	NA	NA	NA	NA	NA	NA	NA	NA	NA	NA	NA	NA	NA	NA	NA	NA
O00192	421	ARVCF	ARVC_HUMAN Armadillo repeat protein deleted in velo-cardio-facial syndrome OS=Homo sapiens OX=9606 GN=ARVCF PE=1 SV=1	|RAC(BTD[C])GALR	NA	NA	NA	NA	NA	NA	NA	NA	NA	NA	NA	NA	NA	NA	NA	NA	NA	NA	NA	NA	NA	NA	NA	NA	NA	NA	2.1	NA	NA	NA	NA	NA	NA	NA	NA	NA	NA	NA	NA	NA	NA	NA	NA	NA	NA
O00203	893	AP3B1	AP3B1_HUMAN AP-3 complex subunit beta-1 OS=Homo sapiens OX=9606 GN=AP3B1 PE=1 SV=3	QPC(BTD[C])IFGDK|	NA	NA	NA	NA	NA	NA	1.38	NA	NA	NA	NA	NA	NA	NA	NA	NA	NA	NA	NA	NA	NA	NA	NA	NA	NA	NA	NA	NA	NA	NA	NA	NA	NA	NA	NA	NA	NA	NA	NA	NA	NA	NA	NA	NA	0.69
O00220	190	TNFRSF10A	TR10A_HUMAN Tumor necrosis factor receptor superfamily member 10A OS=Homo sapiens OX=9606 GN=TNFRSF10A PE=1 SV=3	|NTACQC(BTD[C])K	NA	0.89	0.94	0.56	NA	NA	NA	NA	NA	NA	NA	NA	NA	NA	NA	0.9	NA	0.99	1.61	0.57	NA	0.6	NA	1.05	NA	0.48	1.6	NA	NA	NA	NA	NA	NA	NA	NA	NA	NA	NA	NA	NA	NA	NA	NA	NA	NA
O00220	188	TNFRSF10A	TR10A_HUMAN Tumor necrosis factor receptor superfamily member 10A OS=Homo sapiens OX=9606 GN=TNFRSF10A PE=1 SV=3	NTAC(BTD[C])QCKPGTFR|	NA	NA	NA	NA	NA	NA	NA	NA	NA	NA	NA	NA	NA	NA	NA	NA	NA	NA	NA	NA	NA	NA	NA	NA	NA	NA	NA	NA	NA	NA	NA	NA	NA	NA	NA	NA	NA	NA	NA	NA	NA	NA	NA	NA	NA
O00231	289	PSMD11	PSD11_HUMAN 26S proteasome non-ATPase regulatory subunit 11 OS=Homo sapiens OX=9606 GN=PSMD11 PE=1 SV=3	QTEALKC(BTD[C])VAQASK|C(BTD[C])VAQASK	0.31	3.32	0.72	0.5	0.29	1.2	0.42	0.35	0.92	0.99	0.84	0.71	0.8	0.87	1.37	0.88	0.43	0.78	0.71	NA	0.79	2.51	0.45	0.65	0.53	0.9	1.04	7.02	1.92	0.76	0.64	0.93	0.99	0.76	NA	0.59	0.72	NA	0.65	0.61	0.57	NA	0.99	0.74	0.61
O00231	202	PSMD11	PSD11_HUMAN 26S proteasome non-ATPase regulatory subunit 11 OS=Homo sapiens OX=9606 GN=PSMD11 PE=1 SV=3	|TTANAIYC(BTD[C])PPK	0.63	2.93	0.97	1.87	0.96	1.2	0.82	0.98	1.14	NA	1.94	1.02	5.92	NA	NA	0.9	0.53	1.07	NA	NA	0.99	2.28	0.7	0.67	0.71	1.07	1.89	NA	1.61	0.53	0.44	2.13	1.08	NA	0.69	0.36	0.84	0.63	NA	NA	NA	NA	NA	NA	NA
O00231	257	PSMD11	PSD11_HUMAN 26S proteasome non-ATPase regulatory subunit 11 OS=Homo sapiens OX=9606 GN=PSMD11 PE=1 SV=3	|YMLLC(BTD[C])K	NA	NA	NA	NA	NA	NA	NA	NA	NA	NA	NA	1.72	NA	NA	NA	NA	NA	NA	NA	NA	NA	NA	NA	NA	NA	NA	NA	NA	NA	NA	NA	NA	NA	NA	NA	NA	NA	NA	NA	NA	NA	NA	NA	NA	NA
O00232	31	PSMD12	PSD12_HUMAN 26S proteasome non-ATPase regulatory subunit 12 OS=Homo sapiens OX=9606 GN=PSMD12 PE=1 SV=3	LPEC(BTD[C])AK|LPEC(BTD[C])AK	0.32	3.24	0.73	0.95	0.37	1.43	0.45	0.37	1	0.71	1.31	0.75	1.04	0.88	1.31	1	0.68	0.97	0.86	0.79	1.03	4.16	0.36	0.87	0.74	1.01	1.14	7.38	4.21	1.24	NA	1.61	1.03	0.82	1.02	0.94	0.94	1.24	0.87	0.94	0.8	0.88	1.83	1.02	0.91
O00232	193	PSMD12	PSD12_HUMAN 26S proteasome non-ATPase regulatory subunit 12 OS=Homo sapiens OX=9606 GN=PSMD12 PE=1 SV=3	LC(BTD[C])LAVK|	NA	1.82	1.23	0.46	NA	1.7	0.83	0.65	1.52	0.6	NA	1.56	NA	NA	0.79	1.01	0.7	NA	0.87	0.57	1.38	1.91	0.82	1.2	1.01	1.13	NA	2	1.36	NA	NA	NA	1.49	0.79	NA	NA	1.15	NA	0.99	NA	NA	0.43	0.38	0.68	0.49
O00232	74	PSMD12	PSD12_HUMAN 26S proteasome non-ATPase regulatory subunit 12 OS=Homo sapiens OX=9606 GN=PSMD12 PE=1 SV=3	MC(BTD[C])YEAK|MC(BTD[C])YEAK	0.81	1.65	1.31	0.77	0.64	1.51	0.97	0.89	1.46	NA	NA	1.58	0.95	NA	NA	1.2	0.67	1.43	NA	0.49	1.55	1.28	0.92	0.97	0.92	1.34	2.28	NA	NA	NA	NA	NA	NA	NA	NA	NA	NA	NA	NA	NA	NA	NA	NA	NA	NA
O00232	255	PSMD12	PSD12_HUMAN 26S proteasome non-ATPase regulatory subunit 12 OS=Homo sapiens OX=9606 GN=PSMD12 PE=1 SV=3	AIYDTPC(BTD[C])IQAESEK|	NA	NA	NA	NA	0.64	NA	NA	NA	NA	NA	NA	1.38	NA	NA	NA	NA	NA	1.47	NA	NA	1.06	2.21	NA	1.34	1.13	NA	NA	NA	NA	NA	NA	NA	NA	NA	NA	NA	NA	NA	NA	NA	NA	NA	NA	NA	NA
O00233	81	PSMD9	PSMD9_HUMAN 26S proteasome non-ATPase regulatory subunit 9 OS=Homo sapiens OX=9606 GN=PSMD9 PE=1 SV=3	HNIIC(BTD[C])LQNDHK|	NA	NA	NA	NA	NA	NA	NA	0.29	NA	NA	0.88	NA	NA	NA	1.41	NA	NA	NA	NA	0.5	NA	NA	NA	NA	NA	NA	NA	NA	NA	0.53	0.4	1.9	NA	NA	NA	0.3	0.67	NA	NA	NA	NA	NA	NA	NA	NA
O00233	59	PSMD9	PSMD9_HUMAN 26S proteasome non-ATPase regulatory subunit 9 OS=Homo sapiens OX=9606 GN=PSMD9 PE=1 SV=3	|GIGMNEPLVDC(BTD[C])EGYPR	NA	NA	NA	NA	NA	NA	NA	NA	NA	NA	NA	NA	NA	NA	NA	NA	NA	NA	NA	NA	NA	NA	NA	NA	NA	NA	NA	NA	NA	NA	NA	NA	NA	NA	NA	NA	NA	NA	NA	NA	NA	NA	1.17	1.02	NA
O00244	41	ATOX1	ATOX1_HUMAN Copper transport protein ATOX1 OS=Homo sapiens OX=9606 GN=ATOX1 PE=1 SV=1	VC(BTD[C])IESEHSMDTLLATLK|	NA	NA	1.79	NA	0.81	NA	NA	NA	NA	NA	1.04	1.37	NA	NA	NA	NA	NA	NA	NA	NA	1.45	NA	NA	NA	NA	1.37	NA	NA	NA	NA	NA	NA	NA	0.75	NA	NA	NA	0.41	NA	0.61	NA	NA	0.98	0.79	0.74
O00244	15	ATOX1	ATOX1_HUMAN Copper transport protein ATOX1 OS=Homo sapiens OX=9606 GN=ATOX1 PE=1 SV=1	HEFSVDMTCGGC(BTD[C])AEAVSR|	NA	NA	NA	0.53	NA	NA	NA	NA	NA	NA	0.92	NA	2.93	NA	NA	NA	NA	NA	1.03	0.5	NA	NA	NA	NA	NA	NA	NA	NA	NA	NA	NA	NA	NA	NA	NA	NA	NA	NA	NA	NA	NA	NA	NA	NA	NA
O00264	129	PGRMC1	PGRC1_HUMAN Membrane-associated progesterone receptor component 1 OS=Homo sapiens OX=9606 GN=PGRMC1 PE=1 SV=3	GLATFC(BTD[C])LDK|	0.95	2.97	NA	NA	0.83	1.33	1.11	0.93	1.72	0.73	1.17	NA	1.14	0.84	NA	0.41	NA	1.48	NA	0.61	NA	NA	0.75	NA	NA	NA	2.55	1.87	NA	NA	NA	1.95	NA	NA	1.42	NA	NA	NA	NA	0.92	NA	0.71	NA	0.82	0.71
O00267	1012	SUPT5H	SPT5H_HUMAN Transcription elongation factor SPT5 OS=Homo sapiens OX=9606 GN=SUPT5H PE=1 SV=1	SVTGGMC(BTD[C])SVYLK|	NA	1.53	NA	NA	NA	NA	NA	NA	NA	NA	NA	1.77	NA	NA	NA	NA	0.95	1.25	NA	NA	1.2	NA	NA	1.46	1.46	NA	NA	NA	NA	NA	NA	NA	NA	NA	NA	0.31	NA	NA	NA	NA	NA	NA	NA	NA	NA
O00267	626	SUPT5H	SPT5H_HUMAN Transcription elongation factor SPT5 OS=Homo sapiens OX=9606 GN=SUPT5H PE=1 SV=1	SFAFLHC(BTD[C])K|	NA	1.46	0.93	NA	NA	0.95	NA	0.8	1.36	NA	NA	0.97	NA	NA	NA	1.02	1	0.99	NA	NA	0.69	1.62	NA	0.73	0.87	0.91	NA	NA	NA	NA	NA	NA	NA	NA	NA	NA	NA	NA	NA	NA	NA	NA	NA	NA	NA
O00267	740	SUPT5H	SPT5H_HUMAN Transcription elongation factor SPT5 OS=Homo sapiens OX=9606 GN=SUPT5H PE=1 SV=1	VELHSTC(BTD[C])QTISVDR|VELHSTC(BTD[C])QTISVDR	0.5	NA	1.01	NA	NA	1.23	NA	0.58	0.95	NA	NA	0.97	NA	0.91	NA	1.06	0.87	NA	NA	NA	1.12	1.92	0.64	0.88	NA	1	1.18	NA	NA	NA	0.72	1.34	0.93	0.9	1.06	0.41	0.72	NA	0.89	NA	0.52	1.04	1.05	0.96	0.72
O00273	21	DFFA	DFFA_HUMAN DNA fragmentation factor subunit alpha OS=Homo sapiens OX=9606 GN=DFFA PE=1 SV=1	TLKPC(BTD[C])LLR|	0.4	NA	NA	NA	0.34	1.11	NA	NA	NA	0.5	NA	0.85	NA	NA	NA	0.75	0.87	1.03	0.93	0.69	NA	2.89	NA	NA	NA	1.01	1.45	NA	2.28	NA	NA	NA	1.09	NA	NA	NA	NA	NA	NA	NA	NA	NA	NA	NA	NA
O00273	165	DFFA	DFFA_HUMAN DNA fragmentation factor subunit alpha OS=Homo sapiens OX=9606 GN=DFFA PE=1 SV=1	|QSC(BTD[C])ATVQR	0.28	NA	0.52	0.46	0.24	NA	NA	0.42	1	0.33	NA	NA	0.81	NA	NA	1.01	0.61	0.94	NA	0.48	0.73	NA	0.44	NA	0.52	0.76	1.02	NA	NA	NA	NA	NA	NA	NA	NA	NA	NA	NA	NA	NA	NA	NA	NA	NA	NA
O00273	47	DFFA	DFFA_HUMAN DNA fragmentation factor subunit alpha OS=Homo sapiens OX=9606 GN=DFFA PE=1 SV=1	SKAC(BTD[C])DILAIDK|	0.44	1.92	1.01	NA	0.48	1.26	NA	NA	1.16	NA	NA	1.26	NA	NA	NA	1	NA	0.94	NA	NA	1.24	NA	0.64	0.81	0.85	1.24	NA	NA	2.6	NA	NA	2.23	NA	1.28	1.7	NA	NA	NA	NA	NA	NA	NA	NA	NA	NA
O00273	38	DFFA	DFFA_HUMAN DNA fragmentation factor subunit alpha OS=Homo sapiens OX=9606 GN=DFFA PE=1 SV=1	EQHGVAASC(BTD[C])LEDLR|	NA	0.93	1.36	NA	NA	1.17	NA	NA	1.19	NA	NA	1.32	NA	0.74	1.32	1.08	0.94	NA	NA	NA	0.99	1.52	NA	1	1.01	0.94	NA	NA	NA	NA	NA	1.57	NA	1.03	NA	NA	0.87	0.49	0.78	NA	0.76	0.94	0.95	NA	0.83
O00273	289	DFFA	DFFA_HUMAN DNA fragmentation factor subunit alpha OS=Homo sapiens OX=9606 GN=DFFA PE=1 SV=1	KTETVQEAC(BTD[C])ER|	NA	NA	NA	NA	0.72	NA	NA	NA	NA	NA	NA	NA	NA	NA	NA	NA	0.58	NA	NA	NA	NA	NA	NA	NA	NA	NA	NA	NA	NA	NA	NA	NA	NA	NA	NA	0.39	NA	NA	NA	NA	NA	0.63	NA	NA	NA
O00291	249	HIP1	HIP1_HUMAN Huntingtin-interacting protein 1 OS=Homo sapiens OX=9606 GN=HIP1 PE=1 SV=5	LHSC(BTD[C])LPADTLQGHR|	NA	NA	1.72	NA	NA	NA	NA	NA	NA	NA	NA	NA	NA	NA	NA	NA	NA	NA	NA	NA	NA	NA	NA	0.84	NA	NA	NA	NA	NA	NA	NA	NA	NA	NA	NA	NA	NA	NA	NA	NA	NA	NA	NA	NA	NA
O00291	220	HIP1	HIP1_HUMAN Huntingtin-interacting protein 1 OS=Homo sapiens OX=9606 GN=HIP1 PE=1 SV=5	SVSVTAAGQC(BTD[C])R|	NA	NA	0.85	NA	NA	NA	NA	NA	NA	NA	NA	NA	NA	NA	NA	NA	0.94	NA	NA	NA	0.55	NA	NA	0.7	0.69	NA	NA	NA	NA	NA	NA	NA	NA	NA	NA	NA	NA	NA	NA	NA	NA	NA	NA	NA	NA
O00291	613	HIP1	HIP1_HUMAN Huntingtin-interacting protein 1 OS=Homo sapiens OX=9606 GN=HIP1 PE=1 SV=5	LASTEESMC(BTD[C])QLAK|	NA	NA	NA	NA	NA	NA	NA	NA	NA	NA	NA	NA	NA	NA	NA	NA	1.16	NA	NA	NA	NA	NA	NA	NA	NA	1.23	NA	NA	NA	NA	NA	NA	NA	NA	NA	NA	NA	NA	NA	NA	NA	NA	NA	NA	NA
O00299	191	CLIC1	CLIC1_HUMAN Chloride intracellular channel protein 1 OS=Homo sapiens OX=9606 GN=CLIC1 PE=1 SV=4	|LHIVQVVC(BTD[C])K	NA	1.02	0.82	0.3	0.87	1.39	0.72	0.89	0.94	0.91	0.84	1.85	0.86	1.11	2.06	1.52	0.63	1.1	0.65	0.44	1.72	0.93	0.99	0.9	1.01	1.74	3.07	NA	NA	0.1	0.1	NA	NA	1.02	2.91	0.08	0.62	NA	1.06	NA	NA	NA	NA	NA	NA
O00299	178	CLIC1	CLIC1_HUMAN Chloride intracellular channel protein 1 OS=Homo sapiens OX=9606 GN=CLIC1 PE=1 SV=4	FLDGNELTLADC(BTD[C])NLLPK|	NA	NA	NA	NA	0.7	NA	NA	1.02	NA	0.69	NA	NA	NA	NA	NA	NA	NA	NA	NA	NA	NA	NA	NA	NA	NA	NA	NA	NA	NA	NA	NA	NA	NA	NA	NA	NA	NA	NA	NA	NA	0.88	NA	NA	NA	NA
O00299	24	CLIC1	CLIC1_HUMAN Chloride intracellular channel protein 1 OS=Homo sapiens OX=9606 GN=CLIC1 PE=1 SV=4	|IGNC(BTD[C])PFSQR	NA	3.08	0.64	1.12	NA	0.91	NA	NA	0.74	0.56	0.97	NA	1.54	NA	1.08	0.81	0.81	0.74	0.77	0.97	NA	3.14	NA	NA	0.62	0.79	0.63	NA	5.87	0.61	NA	1.74	NA	NA	0.75	NA	0.85	NA	NA	1.05	0.96	NA	NA	1.56	NA
O00303	256	EIF3F	EIF3F_HUMAN Eukaryotic translation initiation factor 3 subunit F OS=Homo sapiens OX=9606 GN=EIF3F PE=1 SV=1	|TC(BTD[C])FSPNR	NA	1.97	1.04	0.42	0.5	1.45	0.92	0.78	1.1	0.54	0.79	1.34	0.89	NA	1.03	NA	0.77	1.11	0.79	0.43	1.17	1.88	0.78	NA	0.92	1.14	2.39	5.96	NA	NA	NA	NA	NA	0.89	0.88	NA	1.18	0.75	0.88	0.78	0.44	0.69	0.73	0.86	0.65
O00329	991	PIK3CD	PK3CD_HUMAN Phosphatidylinositol 4,5-bisphosphate 3-kinase catalytic subunit delta isoform OS=Homo sapiens OX=9606 GN=PIK3CD PE=1 SV=2	AAGLPELSC(BTD[C])SK|	NA	NA	NA	NA	NA	NA	NA	NA	NA	NA	NA	NA	NA	NA	NA	NA	NA	NA	NA	NA	NA	NA	NA	NA	NA	NA	NA	NA	NA	NA	NA	NA	NA	NA	NA	NA	NA	NA	NA	NA	NA	NA	NA	NA	NA
O00330	307	PDHX	ODPX_HUMAN Pyruvate dehydrogenase protein X component, mitochondrial OS=Homo sapiens OX=9606 GN=PDHX PE=1 SV=3	STVPHAYATADC(BTD[C])DLGAVLK|	NA	NA	NA	NA	NA	NA	NA	NA	NA	NA	NA	NA	NA	NA	NA	NA	NA	NA	NA	NA	1.01	1.94	NA	NA	NA	NA	NA	0.21	NA	NA	NA	NA	NA	NA	NA	NA	NA	NA	NA	NA	0.51	NA	NA	NA	0.44
O00399	18	DCTN6	DCTN6_HUMAN Dynactin subunit 6 OS=Homo sapiens OX=9606 GN=DCTN6 PE=1 SV=1	IAPGAVVC(BTD[C])VESEIR|	NA	NA	NA	NA	0.67	NA	NA	NA	NA	NA	NA	NA	NA	NA	NA	0.86	NA	NA	NA	NA	NA	NA	NA	NA	NA	NA	NA	NA	NA	NA	NA	NA	NA	NA	NA	NA	NA	NA	NA	NA	NA	NA	NA	NA	NA
O00401	431	WASL	WASL_HUMAN Neural Wiskott-Aldrich syndrome protein OS=Homo sapiens OX=9606 GN=WASL PE=1 SV=2	PVSC(BTD[C])SGR|PVSC(BTD[C])SGR	NA	NA	0.67	0.38	NA	NA	NA	NA	NA	NA	NA	0.48	NA	0.91	1.15	0.49	NA	0.52	0.52	NA	0.59	NA	NA	0.46	NA	0.54	NA	NA	NA	NA	NA	1.09	1	0.7	0.97	NA	1.13	NA	0.97	NA	NA	NA	NA	0.55	NA
O00410	972	IPO5	IPO5_HUMAN Importin-5 OS=Homo sapiens OX=9606 GN=IPO5 PE=1 SV=4	ENVNATENC(BTD[C])ISAVGK|	0.48	2.22	0.86	0.97	0.62	1.29	0.81	0.67	1.01	1.1	1.05	0.9	0.94	NA	2.71	0.79	0.7	1.04	0.77	0.46	1	2.03	0.68	NA	0.83	0.99	2.48	NA	2.6	0.71	0.47	1.29	0.83	1	2.13	0.17	1.1	0.56	1.07	0.62	0.66	0.67	0.76	0.71	NA
O00410	733	IPO5	IPO5_HUMAN Importin-5 OS=Homo sapiens OX=9606 GN=IPO5 PE=1 SV=4	VAAAESMPLLLEC(BTD[C])AR|VAAAESMPLLLEC(BTD[C])AR	1.04	2.02	1	0.42	0.74	1.47	0.99	0.85	1.28	0.71	0.98	1.12	0.9	1.07	1.34	0.86	0.62	1.27	0.8	0.47	1.32	1.93	0.94	NA	0.93	1.2	3.41	NA	NA	NA	0.24	2.08	NA	1.16	1.58	NA	0.97	0.69	NA	0.58	0.65	0.69	1.1	0.85	0.65
O00410	348	IPO5	IPO5_HUMAN Importin-5 OS=Homo sapiens OX=9606 GN=IPO5 PE=1 SV=4	MAC(BTD[C])GLGGK|MAC(BTD[C])GLGGK	0.6	2.15	0.79	0.4	0.48	1.01	0.64	0.54	1.09	0.66	0.84	0.93	1.22	1.07	1.32	0.68	0.56	0.85	0.9	0.51	0.84	1.96	0.61	0.75	0.73	0.81	1.44	NA	2.26	NA	NA	NA	0.96	1.13	1.57	0.83	0.72	0.65	1.39	0.62	NA	0.46	NA	0.71	1.04
O00410	180	IPO5	IPO5_HUMAN Importin-5 OS=Homo sapiens OX=9606 GN=IPO5 PE=1 SV=4	MLVQC(BTD[C])MQDQEHPSIR|MLVQC(BTD[C])MQDQEHPSIR	0.72	1.86	1.07	0.59	0.84	1.2	1.12	0.99	1.27	0.64	0.95	1.37	0.95	1.17	1.48	0.98	0.65	1.25	0.86	0.44	1.11	1.63	1.15	1.08	1.03	1.23	3.88	NA	NA	0.07	0.11	2.25	1.07	1.11	1.77	0.06	0.88	0.52	0.84	0.46	0.42	0.54	0.58	0.8	0.58
O00410	266	IPO5	IPO5_HUMAN Importin-5 OS=Homo sapiens OX=9606 GN=IPO5 PE=1 SV=4	LC(BTD[C])GDTSLNNMQR|LC(BTD[C])GDTSLNNMQR	1.16	2.2	1.15	NA	0.97	1.1	NA	2.54	1.56	0.61	NA	1.64	NA	NA	NA	0.97	0.53	1.2	NA	NA	1.3	1.26	1.05	1.16	0.93	1.05	NA	NA	NA	NA	NA	NA	NA	NA	NA	NA	NA	NA	NA	NA	NA	NA	NA	NA	0.57
O00410	110	IPO5	IPO5_HUMAN Importin-5 OS=Homo sapiens OX=9606 GN=IPO5 PE=1 SV=4	KVC(BTD[C])DIAAELAR VC(BTD[C])DIAAELAR|KVC(BTD[C])DIAAELAR	0.49	2.25	0.85	0.5	0.61	1.22	0.74	0.54	1.05	0.56	0.94	1.1	0.86	1.12	0.94	0.87	0.62	1.05	NA	0.5	1.04	NA	0.77	0.86	0.86	1.07	2.16	13.46	2.77	0.35	0.44	2.6	1.03	1.02	1.45	0.26	1.03	0.68	1.01	0.62	0.65	0.76	1.04	0.86	0.61
O00410	682	IPO5	IPO5_HUMAN Importin-5 OS=Homo sapiens OX=9606 GN=IPO5 PE=1 SV=4	|STAC(BTD[C])QMLVCYAK	NA	NA	NA	NA	NA	NA	1.25	1.28	NA	NA	NA	0.98	NA	NA	NA	1.06	0.81	NA	NA	NA	0.94	NA	NA	0.92	0.86	0.91	NA	NA	NA	NA	0.49	3.62	1.61	NA	NA	0.28	1.4	NA	NA	NA	NA	NA	NA	NA	NA
O00410	915	IPO5	IPO5_HUMAN Importin-5 OS=Homo sapiens OX=9606 GN=IPO5 PE=1 SV=4	|PMLQYVC(BTD[C])DNSPEVR	NA	2.41	0.95	NA	NA	NA	NA	NA	NA	NA	NA	1.15	0.89	NA	NA	1.09	0.89	0.9	NA	NA	1.49	NA	NA	1.06	0.97	1.48	NA	NA	NA	NA	NA	NA	NA	NA	NA	NA	NA	0.89	NA	0.94	0.97	NA	NA	0.97	NA
O00410	687	IPO5	IPO5_HUMAN Importin-5 OS=Homo sapiens OX=9606 GN=IPO5 PE=1 SV=4	|STACQMLVC(BTD[C])YAK	NA	NA	1.02	0.75	0.82	1.23	NA	NA	0.87	NA	1.15	1.17	1.22	NA	NA	NA	0.67	0.92	1.17	0.76	0.97	NA	NA	0.78	NA	0.82	NA	NA	NA	0.9	1.12	NA	NA	NA	NA	0.54	1.04	NA	NA	NA	NA	NA	NA	NA	NA
O00410	1057	IPO5	IPO5_HUMAN Importin-5 OS=Homo sapiens OX=9606 GN=IPO5 PE=1 SV=4	HEDPC(BTD[C])AK|HEDPC(BTD[C])AK	0.29	2.91	NA	0.75	0.44	1.41	0.49	0.29	0.72	NA	1.04	0.85	1.21	0.73	0.96	0.77	0.59	0.84	0.79	0.56	0.82	NA	0.35	0.79	0.8	0.75	2.28	NA	NA	0.21	NA	1	NA	0.88	1.56	NA	NA	0.9	0.9	0.79	NA	1	NA	1	0.99
O00410	420	IPO5	IPO5_HUMAN Importin-5 OS=Homo sapiens OX=9606 GN=IPO5 PE=1 SV=4	YAAC(BTD[C])NAVGQMATDFAPGFQK|	NA	NA	1	0.37	0.6	NA	NA	NA	NA	NA	NA	1.1	NA	NA	NA	0.88	0.69	NA	1.01	0.59	1.09	NA	0.83	1.03	0.87	1.1	NA	NA	NA	NA	NA	NA	NA	NA	NA	NA	NA	NA	NA	NA	NA	NA	NA	NA	NA
O00410	473	IPO5	IPO5_HUMAN Importin-5 OS=Homo sapiens OX=9606 GN=IPO5 PE=1 SV=4	|VQAHAAAALINFTEDC(BTD[C])PK	NA	NA	NA	NA	NA	NA	NA	NA	NA	NA	NA	NA	NA	NA	NA	NA	0.99	1.53	NA	NA	NA	1.64	NA	NA	NA	NA	NA	NA	NA	NA	NA	1.02	NA	NA	0.97	NA	NA	NA	NA	NA	NA	NA	NA	NA	NA
O00411	765	POLRMT	RPOM_HUMAN DNA-directed RNA polymerase, mitochondrial OS=Homo sapiens OX=9606 GN=POLRMT PE=1 SV=2	ELAHC(BTD[C])QK|	NA	1	NA	NA	NA	1.11	NA	NA	NA	NA	NA	NA	NA	NA	NA	NA	NA	1.01	NA	NA	0.83	2.37	NA	NA	NA	NA	NA	NA	NA	NA	NA	NA	NA	NA	NA	NA	NA	NA	NA	NA	NA	NA	NA	NA	NA
O00411	1192	POLRMT	RPOM_HUMAN DNA-directed RNA polymerase, mitochondrial OS=Homo sapiens OX=9606 GN=POLRMT PE=1 SV=2	RFC(BTD[C])SEPQK|	NA	NA	NA	NA	NA	NA	NA	NA	1.01	NA	NA	NA	NA	NA	NA	NA	NA	0.99	NA	NA	NA	NA	NA	NA	NA	NA	NA	NA	NA	NA	NA	NA	NA	NA	NA	NA	NA	NA	NA	NA	NA	NA	NA	NA	NA
O00411	413	POLRMT	RPOM_HUMAN DNA-directed RNA polymerase, mitochondrial OS=Homo sapiens OX=9606 GN=POLRMT PE=1 SV=2	VC(BTD[C])VVSVEKPTLPSK|	NA	1.25	0.94	NA	0.51	NA	NA	NA	1	NA	NA	NA	NA	NA	NA	0.94	0.75	NA	NA	NA	NA	1.2	NA	NA	0.75	0.86	NA	NA	NA	NA	NA	NA	NA	NA	NA	NA	0.89	NA	NA	NA	NA	NA	NA	NA	NA
O00411	398	POLRMT	RPOM_HUMAN DNA-directed RNA polymerase, mitochondrial OS=Homo sapiens OX=9606 GN=POLRMT PE=1 SV=2	TLQC(BTD[C])LFEK|	NA	NA	NA	NA	NA	NA	NA	NA	NA	NA	NA	NA	NA	NA	NA	NA	NA	NA	NA	NA	NA	NA	NA	0.87	NA	1.06	NA	NA	NA	NA	NA	NA	NA	NA	NA	NA	NA	NA	NA	NA	NA	NA	NA	NA	NA
O00411	119	POLRMT	RPOM_HUMAN DNA-directed RNA polymerase, mitochondrial OS=Homo sapiens OX=9606 GN=POLRMT PE=1 SV=2	DATPVPC(BTD[C])GR|	NA	NA	NA	NA	NA	NA	NA	NA	NA	NA	NA	NA	NA	NA	NA	1.33	NA	NA	NA	NA	NA	NA	NA	NA	NA	NA	NA	NA	NA	NA	NA	NA	NA	NA	NA	NA	NA	NA	NA	NA	NA	NA	NA	NA	NA
O00421	181	CCRL2	CCRL2_HUMAN C-C chemokine receptor-like 2 OS=Homo sapiens OX=9606 GN=CCRL2 PE=1 SV=2	YKC(BTD[C])AFSR|	NA	NA	NA	NA	NA	NA	NA	NA	NA	NA	NA	NA	NA	NA	NA	NA	NA	NA	NA	NA	NA	NA	NA	NA	NA	NA	NA	NA	NA	NA	NA	NA	NA	NA	1.93	NA	NA	NA	NA	NA	NA	NA	NA	NA	NA
O00422	26	SAP18	SAP18_HUMAN Histone deacetylase complex subunit SAP18 OS=Homo sapiens OX=9606 GN=SAP18 PE=1 SV=1	|TC(BTD[C])PLLLR	0.47	1.68	0.78	0.55	0.39	0.82	0.59	0.44	0.91	NA	NA	0.79	0.62	0.87	1.4	0.87	0.74	0.86	0.52	NA	0.85	NA	NA	0.83	0.71	0.89	NA	NA	NA	0.48	0.37	1.63	1.06	0.89	0.95	0.18	0.9	0.44	NA	0.81	0.71	0.73	1.17	0.93	0.7
O00425	194	IGF2BP3	IF2B3_HUMAN Insulin-like growth factor 2 mRNA-binding protein 3 OS=Homo sapiens OX=9606 GN=IGF2BP3 PE=1 SV=2	|QKPC(BTD[C])DLPLR	NA	2.82	0.77	NA	NA	NA	NA	NA	0.94	NA	0.74	0.77	NA	NA	NA	0.75	0.81	0.83	NA	NA	0.52	2.45	NA	NA	NA	0.62	NA	NA	NA	NA	NA	NA	NA	0.69	NA	NA	NA	NA	NA	NA	NA	NA	NA	NA	NA
O00429	644	DNM1L	DNM1L_HUMAN Dynamin-1-like protein OS=Homo sapiens OX=9606 GN=DNM1L PE=1 SV=2	EQRDC(BTD[C])EVIER|	NA	NA	NA	NA	0.52	NA	NA	NA	NA	0.85	0.72	1.95	NA	NA	NA	1.2	NA	NA	NA	NA	NA	NA	NA	NA	NA	NA	NA	NA	NA	0.64	0.57	NA	NA	NA	NA	0.32	NA	NA	NA	NA	NA	NA	NA	NA	NA
O00429	446	DNM1L	DNM1L_HUMAN Dynamin-1-like protein OS=Homo sapiens OX=9606 GN=DNM1L PE=1 SV=2	IIQHC(BTD[C])SNYSTQELLR|	1.02	1.69	1.14	0.41	NA	1.24	0.93	0.72	1.53	0.45	0.87	1.63	0.62	NA	NA	1.14	0.81	1.21	NA	0.42	1.07	1.65	NA	1.04	0.84	1.03	NA	NA	NA	NA	NA	NA	1.02	0.81	1.18	NA	0.53	NA	NA	NA	NA	NA	NA	NA	NA
O00429	361	DNM1L	DNM1L_HUMAN Dynamin-1-like protein OS=Homo sapiens OX=9606 GN=DNM1L PE=1 SV=2	|YIETSELC(BTD[C])GGAR	NA	NA	NA	NA	NA	NA	NA	NA	NA	NA	NA	1.37	NA	NA	NA	0.93	0.76	1	NA	NA	1.18	NA	NA	0.64	0.88	1.31	NA	NA	NA	NA	NA	NA	NA	NA	NA	NA	NA	NA	NA	NA	NA	NA	NA	1.23	NA
O00429	300	DNM1L	DNM1L_HUMAN Dynamin-1-like protein OS=Homo sapiens OX=9606 GN=DNM1L PE=1 SV=2	DC(BTD[C])LPELK|	NA	NA	NA	0.73	NA	NA	NA	NA	NA	NA	NA	1.53	NA	NA	NA	NA	NA	NA	NA	NA	NA	0.52	NA	NA	1	NA	NA	NA	NA	NA	NA	NA	NA	NA	NA	NA	NA	NA	NA	NA	NA	NA	NA	NA	NA
O00429	345	DNM1L	DNM1L_HUMAN Dynamin-1-like protein OS=Homo sapiens OX=9606 GN=DNM1L PE=1 SV=2	FATEYC(BTD[C])NTIEGTAK|	NA	NA	NA	NA	NA	NA	NA	NA	NA	NA	NA	NA	NA	NA	NA	NA	NA	1.4	NA	NA	NA	NA	NA	NA	NA	NA	NA	NA	NA	NA	NA	NA	NA	NA	NA	NA	NA	1.55	NA	NA	1.02	NA	NA	NA	NA
O00443	804	PIK3C2A	P3C2A_HUMAN Phosphatidylinositol 4-phosphate 3-kinase C2 domain-containing subunit alpha OS=Homo sapiens OX=9606 GN=PIK3C2A PE=1 SV=2	FLTC(BTD[C])GTK|	NA	NA	NA	NA	NA	1.34	NA	NA	NA	NA	NA	NA	NA	NA	NA	NA	NA	NA	NA	NA	NA	NA	NA	NA	NA	NA	NA	NA	NA	NA	NA	NA	NA	NA	NA	NA	NA	NA	NA	NA	NA	NA	NA	NA	NA
O00443	317	PIK3C2A	P3C2A_HUMAN Phosphatidylinositol 4-phosphate 3-kinase C2 domain-containing subunit alpha OS=Homo sapiens OX=9606 GN=PIK3C2A PE=1 SV=2	STANC(BTD[C])HLER|	NA	NA	NA	NA	NA	NA	NA	NA	NA	NA	NA	NA	NA	NA	NA	NA	NA	0.56	NA	NA	NA	NA	NA	NA	NA	NA	NA	NA	NA	NA	NA	NA	NA	NA	NA	NA	NA	NA	NA	NA	NA	NA	NA	NA	NA
O00468	534	AGRN	AGRIN_HUMAN Agrin OS=Homo sapiens OX=9606 GN=AGRN PE=1 SV=6	|KGPC(BTD[C])DR	NA	NA	NA	NA	NA	NA	NA	NA	NA	NA	NA	NA	NA	NA	NA	NA	NA	NA	NA	NA	NA	NA	NA	NA	NA	NA	NA	NA	NA	NA	NA	NA	NA	NA	NA	NA	NA	NA	NA	NA	NA	NA	NA	NA	NA
O00468	389	AGRN	AGRIN_HUMAN Agrin OS=Homo sapiens OX=9606 GN=AGRN PE=1 SV=6	SGQC(BTD[C])QGR|	NA	NA	NA	NA	NA	NA	NA	NA	NA	NA	NA	NA	NA	NA	NA	NA	NA	NA	NA	NA	NA	NA	NA	NA	NA	NA	NA	NA	NA	NA	NA	NA	NA	NA	NA	NA	NA	NA	NA	NA	NA	NA	NA	NA	NA
O00469	494	PLOD2	PLOD2_HUMAN Procollagen-lysine,2-oxoglutarate 5-dioxygenase 2 OS=Homo sapiens OX=9606 GN=PLOD2 PE=1 SV=2	DKLDPDMALC(BTD[C])R|DKLDPDMALC(BTD[C])R	NA	NA	0.9	NA	NA	NA	1.09	NA	1.18	NA	NA	1.69	NA	1.03	NA	0.99	0.98	NA	0.69	NA	1.21	NA	NA	0.88	0.97	1.04	1.65	NA	3.76	NA	1.42	NA	NA	NA	NA	0.66	0.96	NA	1.54	1.29	NA	NA	NA	NA	NA
O00469	576	PLOD2	PLOD2_HUMAN Procollagen-lysine,2-oxoglutarate 5-dioxygenase 2 OS=Homo sapiens OX=9606 GN=PLOD2 PE=1 SV=2	AC(BTD[C])DELVEEMEHYGK|	NA	NA	NA	NA	NA	NA	NA	NA	NA	NA	NA	NA	NA	NA	NA	NA	NA	NA	NA	NA	NA	NA	NA	NA	NA	NA	NA	NA	NA	NA	NA	NA	NA	NA	NA	NA	NA	NA	NA	NA	NA	NA	NA	NA	NA
O00471	111	EXOC5	EXOC5_HUMAN Exocyst complex component 5 OS=Homo sapiens OX=9606 GN=EXOC5 PE=1 SV=1	|VC(BTD[C])HLGDQLEGVNTPR	NA	NA	NA	NA	0.69	NA	NA	NA	NA	NA	NA	1.04	NA	NA	NA	0.97	0.68	NA	NA	NA	NA	NA	NA	1.1	NA	0.84	NA	NA	NA	NA	NA	NA	NA	NA	NA	NA	NA	NA	NA	NA	NA	NA	NA	NA	NA
O00471	580	EXOC5	EXOC5_HUMAN Exocyst complex component 5 OS=Homo sapiens OX=9606 GN=EXOC5 PE=1 SV=1	VC(BTD[C])AYVR|	NA	NA	NA	NA	NA	NA	NA	NA	NA	NA	NA	NA	NA	NA	NA	NA	0.91	NA	NA	NA	0.96	NA	NA	NA	NA	NA	NA	NA	NA	NA	NA	NA	NA	NA	NA	NA	NA	NA	NA	NA	NA	NA	NA	NA	NA
O00471	517	EXOC5	EXOC5_HUMAN Exocyst complex component 5 OS=Homo sapiens OX=9606 GN=EXOC5 PE=1 SV=1	LSEC(BTD[C])LQK|	NA	NA	NA	NA	NA	NA	NA	NA	NA	NA	NA	0.94	NA	NA	NA	NA	NA	NA	NA	NA	NA	NA	NA	NA	NA	0.73	1.32	NA	NA	NA	NA	NA	NA	NA	NA	NA	NA	NA	NA	NA	NA	NA	NA	NA	NA
O00507	117	USP9Y	USP9Y_HUMAN Probable ubiquitin carboxyl-terminal hydrolase FAF-Y OS=Homo sapiens OX=9606 GN=USP9Y PE=2 SV=2	|SEAC(BTD[C])QR	NA	NA	NA	0.65	NA	NA	NA	NA	NA	NA	NA	NA	NA	NA	NA	NA	NA	NA	NA	NA	NA	NA	NA	NA	NA	NA	NA	NA	NA	NA	NA	NA	NA	NA	NA	NA	NA	NA	NA	NA	NA	NA	NA	NA	NA
O00541	272	PES1	PESC_HUMAN Pescadillo homolog OS=Homo sapiens OX=9606 GN=PES1 PE=1 SV=1	AGEGTYALDSESC(BTD[C])MEK|AGEGTYALDSESC(BTD[C])MEK	NA	1.51	NA	NA	0.73	NA	1.03	0.72	NA	0.56	NA	1.24	NA	NA	NA	1.16	NA	1.11	NA	NA	1.29	NA	0.94	1.23	0.98	1.23	NA	NA	NA	NA	NA	NA	NA	NA	NA	NA	NA	NA	NA	0.85	NA	NA	NA	NA	NA
O00541	153	PES1	PESC_HUMAN Pescadillo homolog OS=Homo sapiens OX=9606 GN=PES1 PE=1 SV=1	|TGKC(BTD[C])HVQTIQLCR	NA	NA	NA	0.61	NA	NA	NA	NA	0.82	NA	NA	NA	NA	NA	NA	NA	NA	NA	NA	NA	1.1	NA	NA	NA	NA	NA	NA	NA	NA	NA	NA	NA	NA	0.63	NA	NA	NA	NA	NA	NA	NA	NA	NA	NA	0.89
O00541	361	PES1	PESC_HUMAN Pescadillo homolog OS=Homo sapiens OX=9606 GN=PES1 PE=1 SV=1	SLC(BTD[C])IGATYDVTDSR|	NA	NA	NA	NA	NA	NA	NA	NA	NA	NA	NA	NA	NA	NA	NA	NA	NA	NA	NA	NA	1.02	NA	NA	NA	1.72	NA	NA	NA	NA	NA	NA	NA	NA	NA	NA	NA	NA	NA	NA	NA	NA	NA	NA	NA	NA
O00541	38	PES1	PESC_HUMAN Pescadillo homolog OS=Homo sapiens OX=9606 GN=PES1 PE=1 SV=1	RLC(BTD[C])ILK|	NA	NA	NA	NA	NA	NA	NA	NA	NA	NA	NA	NA	NA	NA	NA	NA	NA	NA	NA	NA	NA	NA	NA	NA	NA	NA	NA	NA	NA	NA	NA	NA	0.62	NA	NA	NA	NA	NA	NA	NA	NA	NA	NA	NA	NA
O00560	239	SDCBP	SDCB1_HUMAN Syntenin-1 OS=Homo sapiens OX=9606 GN=SDCBP PE=1 SV=1	|NGLLTEHNIC(BTD[C])EINGQNVIGLK	NA	NA	NA	NA	NA	NA	NA	NA	NA	NA	NA	1.12	NA	NA	NA	1.11	NA	NA	NA	NA	NA	NA	NA	0.97	NA	NA	NA	0.51	NA	NA	NA	NA	NA	NA	NA	0.23	NA	NA	NA	NA	0.41	NA	NA	NA	NA
O00560	118	SDCBP	SDCB1_HUMAN Syntenin-1 OS=Homo sapiens OX=9606 GN=SDCBP PE=1 SV=1	EVILC(BTD[C])KDQDGK|	NA	NA	NA	NA	NA	NA	NA	NA	NA	NA	NA	NA	NA	NA	NA	NA	NA	NA	NA	NA	NA	NA	NA	NA	NA	NA	NA	NA	NA	3.59	NA	NA	NA	NA	NA	NA	NA	NA	NA	NA	NA	NA	NA	NA	NA
O00566	27	MPHOSPH10	MPP10_HUMAN U3 small nucleolar ribonucleoprotein protein MPP10 OS=Homo sapiens OX=9606 GN=MPHOSPH10 PE=1 SV=2	|ATGRPEC(BTD[C])FLTIQEGLASK	NA	NA	0.89	NA	NA	NA	NA	0.78	NA	NA	NA	1.04	NA	0.94	1.08	1.07	NA	NA	NA	NA	NA	NA	NA	NA	NA	0.94	NA	NA	1.28	NA	NA	2.09	1.07	0.81	1.03	0.71	0.83	NA	0.74	NA	0.6	0.63	0.97	0.99	0.62
O00567	376	NOP56	NOP56_HUMAN Nucleolar protein 56 OS=Homo sapiens OX=9606 GN=NOP56 PE=1 SV=4	YLANKC(BTD[C])SIASR|	0.58	NA	NA	NA	1.02	NA	0.78	0.62	NA	0.71	NA	1.92	NA	NA	3.63	1.33	NA	2.52	NA	1.54	2.09	NA	NA	0.86	1.39	2.36	NA	0.28	NA	0.62	0.92	4.36	2.49	NA	3.64	0.74	NA	0.51	NA	0.69	NA	NA	NA	0.87	NA
O00567	142	NOP56	NOP56_HUMAN Nucleolar protein 56 OS=Homo sapiens OX=9606 GN=NOP56 PE=1 SV=4	GLTDLSAC(BTD[C])K|	0.34	NA	NA	NA	0.41	NA	0.66	1.02	NA	0.6	NA	1.09	NA	NA	NA	NA	0.73	NA	NA	NA	1.07	NA	0.89	0.87	NA	0.93	NA	NA	NA	NA	NA	NA	1.23	NA	NA	NA	NA	NA	NA	NA	NA	NA	NA	NA	NA
O00567	211	NOP56	NOP56_HUMAN Nucleolar protein 56 OS=Homo sapiens OX=9606 GN=NOP56 PE=1 SV=4	IINDNATYC(BTD[C])R|	0.53	3.03	1.03	0.61	0.59	1.27	0.83	0.76	0.88	NA	0.79	NA	0.89	1	1.62	NA	0.75	1.17	0.8	0.77	0.97	2.35	0.87	1.21	0.8	NA	1.25	NA	2.25	NA	NA	NA	1.23	NA	NA	0.79	NA	NA	1.12	NA	0.75	0.68	2.86	1.12	1.55
O00567	472	NOP56	NOP56_HUMAN Nucleolar protein 56 OS=Homo sapiens OX=9606 GN=NOP56 PE=1 SV=4	LAALALASSENSSSTPEEC(BTD[C])EEMSEKPK|	NA	NA	NA	NA	NA	NA	NA	NA	NA	NA	NA	NA	NA	NA	NA	NA	NA	NA	NA	NA	NA	NA	NA	NA	NA	NA	NA	NA	NA	NA	NA	NA	NA	NA	NA	NA	0.71	0.91	NA	0.69	0.71	0.86	1.44	NA	NA
O00571	317	DDX3X	DDX3X_HUMAN ATP-dependent RNA helicase DDX3X OS=Homo sapiens OX=9606 GN=DDX3X PE=1 SV=3	GC(BTD[C])HLLVATPGR|	0.42	1.86	NA	0.5	0.39	NA	0.67	0.48	1.04	NA	NA	NA	NA	NA	1.09	NA	NA	1.07	NA	NA	1	1.62	NA	0.86	0.89	1.04	1.96	NA	NA	NA	0.94	1.72	0.91	0.95	0.97	NA	0.96	0.63	1.08	0.51	NA	NA	NA	0.85	NA
O00571	223	DDX3X	DDX3X_HUMAN ATP-dependent RNA helicase DDX3X OS=Homo sapiens OX=9606 GN=DDX3X PE=1 SV=3	RDLMAC(BTD[C])AQTGSGK DLMAC(BTD[C])AQTGSGK|	0.74	2.18	NA	NA	NA	NA	0.72	0.55	1.05	NA	NA	NA	NA	NA	NA	NA	NA	0.97	NA	NA	1.01	1.76	NA	0.82	0.84	1.03	1.33	NA	NA	NA	NA	NA	0.99	1.05	1.42	NA	0.93	NA	NA	NA	NA	NA	NA	NA	NA
O00571	298	DDX3X	DDX3X_HUMAN ATP-dependent RNA helicase DDX3X OS=Homo sapiens OX=9606 GN=DDX3X PE=1 SV=3	VRPC(BTD[C])VVYGGADIGQQIR|	0.46	2.53	NA	0.55	0.46	NA	0.62	0.41	0.91	NA	NA	NA	NA	0.96	NA	NA	NA	0.96	NA	NA	1.07	2.31	NA	0.84	0.8	0.9	NA	NA	NA	NA	0.89	1.51	1	1	1.04	NA	0.8	0.71	0.91	0.49	NA	NA	1.3	NA	NA
O00571	341	DDX3X	DDX3X_HUMAN ATP-dependent RNA helicase DDX3X OS=Homo sapiens OX=9606 GN=DDX3X PE=1 SV=3	IGLDFC(BTD[C])K|	NA	NA	NA	NA	0.75	NA	NA	NA	NA	NA	NA	NA	NA	NA	NA	NA	NA	1.18	NA	NA	NA	1.82	NA	0.91	0.92	NA	2.03	NA	NA	NA	NA	NA	NA	NA	NA	NA	NA	NA	NA	NA	NA	NA	NA	NA	NA
O00592	395	PODXL	PODXL_HUMAN Podocalyxin OS=Homo sapiens OX=9606 GN=PODXL PE=1 SV=2	ATFNPAQDKC(BTD[C])GIR|ATFNPAQDKC(BTD[C])GIR	0.44	3.16	0.68	0.77	0.34	1.32	0.58	0.42	0.97	0.68	0.71	0.77	1.23	0.87	1.32	0.74	0.81	0.82	0.85	0.63	0.69	2.92	NA	0.6	1.02	0.82	0.89	NA	3.77	NA	0.93	1.82	1.26	1.01	1.09	0.82	0.48	0.18	0.86	NA	NA	NA	NA	NA	NA
O00592	381	PODXL	PODXL_HUMAN Podocalyxin OS=Homo sapiens OX=9606 GN=PODXL PE=1 SV=2	|LISLIC(BTD[C])R	NA	0.95	0.96	0.84	0.74	0.84	0.88	0.96	0.89	NA	1.26	1.19	NA	0.77	1.2	NA	0.88	NA	NA	0.36	0.93	1.35	1.08	0.83	0.72	1.08	1.44	0.59	NA	NA	NA	1.12	1.08	NA	NA	NA	0.59	NA	1.32	NA	NA	NA	NA	NA	NA
O00622	337	CCN1	CCN1_HUMAN CCN family member 1 OS=Homo sapiens OX=9606 GN=CCN1 PE=1 SV=1	FRC(BTD[C])EDGETFSK|	0.89	NA	NA	0.54	NA	NA	1.02	NA	NA	NA	NA	NA	NA	NA	NA	NA	NA	NA	1.1	NA	NA	NA	1.08	NA	NA	NA	NA	NA	NA	NA	NA	NA	NA	NA	NA	NA	NA	NA	NA	NA	NA	NA	NA	NA	NA
O00622	100	CCN1	CCN1_HUMAN CCN family member 1 OS=Homo sapiens OX=9606 GN=CCN1 PE=1 SV=1	|AQSEGRPC(BTD[C])EYNSR	NA	NA	NA	0.63	0.49	NA	0.53	0.46	NA	NA	0.94	NA	1.15	NA	NA	NA	NA	NA	1.01	0.72	NA	NA	0.72	NA	NA	NA	NA	NA	NA	NA	NA	NA	NA	NA	NA	NA	NA	NA	NA	NA	NA	NA	NA	NA	NA
O00622	26	CCN1	CCN1_HUMAN CCN family member 1 OS=Homo sapiens OX=9606 GN=CCN1 PE=1 SV=1	TC(BTD[C])PAACHCPLEAPK|	NA	NA	NA	NA	NA	NA	NA	NA	NA	NA	NA	NA	1.87	NA	0.98	NA	NA	NA	NA	NA	NA	NA	NA	NA	NA	NA	NA	NA	NA	NA	NA	NA	NA	NA	NA	NA	2.43	NA	NA	NA	NA	NA	NA	NA	NA
O00622	70	CCN1	CCN1_HUMAN CCN family member 1 OS=Homo sapiens OX=9606 GN=CCN1 PE=1 SV=1	|TQPC(BTD[C])DHTK	NA	NA	NA	NA	0.47	NA	NA	NA	NA	NA	NA	NA	NA	NA	NA	NA	NA	NA	NA	NA	NA	NA	NA	NA	NA	NA	NA	NA	NA	NA	NA	NA	NA	NA	NA	NA	NA	NA	NA	NA	NA	NA	NA	NA	NA
O00622	78	CCN1	CCN1_HUMAN CCN family member 1 OS=Homo sapiens OX=9606 GN=CCN1 PE=1 SV=1	|GLEC(BTD[C])NFGASSTALK	NA	NA	NA	4.13	NA	NA	NA	NA	NA	NA	NA	NA	NA	NA	NA	NA	NA	NA	NA	NA	NA	NA	NA	NA	NA	NA	NA	NA	NA	NA	NA	NA	NA	NA	NA	NA	NA	NA	NA	NA	NA	NA	NA	NA	NA
O00622	267	CCN1	CCN1_HUMAN CCN family member 1 OS=Homo sapiens OX=9606 GN=CCN1 PE=1 SV=1	|IC(BTD[C])EVRPCGQPVYSSLK	NA	NA	NA	0.46	NA	NA	NA	NA	NA	NA	1.95	NA	NA	NA	NA	NA	NA	NA	NA	NA	NA	NA	NA	NA	NA	NA	NA	1.71	NA	NA	NA	NA	NA	NA	NA	NA	NA	NA	NA	NA	NA	NA	0.49	NA	NA
O00622	258	CCN1	CCN1_HUMAN CCN family member 1 OS=Homo sapiens OX=9606 GN=CCN1 PE=1 SV=1	VTNDNPEC(BTD[C])R|	NA	NA	NA	NA	NA	NA	NA	NA	NA	NA	NA	NA	0.84	NA	NA	NA	NA	NA	NA	0.66	NA	NA	NA	NA	NA	NA	NA	NA	NA	NA	NA	NA	NA	NA	NA	NA	NA	NA	NA	NA	NA	NA	NA	NA	NA
O00622	272	CCN1	CCN1_HUMAN CCN family member 1 OS=Homo sapiens OX=9606 GN=CCN1 PE=1 SV=1	ICEVRPC(BTD[C])GQPVYSSLK|	NA	NA	NA	NA	NA	NA	NA	NA	NA	NA	NA	NA	NA	NA	NA	NA	NA	NA	NA	NA	NA	NA	NA	NA	NA	NA	NA	NA	NA	NA	NA	NA	NA	1.03	NA	NA	NA	NA	NA	NA	NA	NA	NA	NA	NA
O00764	273	PDXK	PDXK_HUMAN Pyridoxal kinase OS=Homo sapiens OX=9606 GN=PDXK PE=1 SV=1	TIQC(BTD[C])AK|	NA	NA	0.54	0.46	NA	1.2	0.66	NA	NA	NA	NA	0.74	1	NA	NA	0.77	NA	NA	0.77	NA	0.67	NA	NA	0.59	0.56	0.78	1.5	NA	NA	NA	NA	NA	NA	NA	NA	NA	NA	NA	NA	NA	NA	NA	NA	NA	NA
O00764	112	PDXK	PDXK_HUMAN Pyridoxal kinase OS=Homo sapiens OX=9606 GN=PDXK PE=1 SV=1	LVYVC(BTD[C])DPVLGDK|	NA	NA	NA	NA	NA	NA	NA	NA	NA	NA	NA	NA	NA	NA	NA	NA	NA	NA	NA	NA	0.91	NA	NA	NA	1.16	NA	NA	NA	NA	NA	NA	NA	NA	NA	NA	NA	NA	NA	NA	NA	NA	NA	NA	NA	NA
O14494	40	PLPP1	PLPP1_HUMAN Phospholipid phosphatase 1 OS=Homo sapiens OX=9606 GN=PLPP1 PE=1 SV=1	GVFC(BTD[C])NDESIK|	NA	NA	NA	NA	NA	NA	NA	NA	NA	NA	NA	NA	NA	NA	NA	NA	NA	NA	1.16	NA	NA	NA	NA	NA	NA	NA	NA	NA	NA	NA	NA	NA	NA	NA	NA	NA	NA	NA	NA	NA	NA	NA	NA	NA	NA
O14523	115	C2CD2L	C2C2L_HUMAN Phospholipid transfer protein C2CD2L OS=Homo sapiens OX=9606 GN=C2CD2L PE=1 SV=3	ALNEQAC(BTD[C])R|	NA	NA	NA	NA	0.42	1.01	1.13	0.64	NA	NA	NA	NA	NA	NA	NA	NA	0.58	NA	NA	NA	NA	1.78	NA	NA	NA	NA	1.02	NA	2.87	NA	NA	2.09	1.34	NA	NA	NA	NA	NA	1.3	NA	NA	NA	NA	NA	NA
O14530	135	TXNDC9	TXND9_HUMAN Thioredoxin domain-containing protein 9 OS=Homo sapiens OX=9606 GN=TXNDC9 PE=1 SV=2	|APFLC(BTD[C])ER	NA	2.53	NA	0.46	0.53	1.33	0.55	1.91	NA	NA	NA	1.03	0.96	NA	NA	0.94	0.62	1.05	0.58	0.34	1.06	2.16	0.57	0.9	0.86	1.04	1.77	NA	NA	NA	NA	0.79	NA	NA	NA	NA	NA	NA	NA	NA	NA	NA	NA	NA	NA
O14530	94	TXNDC9	TXND9_HUMAN Thioredoxin domain-containing protein 9 OS=Homo sapiens OX=9606 GN=TXNDC9 PE=1 SV=2	|ESENVVC(BTD[C])HFYR	NA	NA	NA	NA	NA	NA	NA	NA	NA	NA	NA	NA	NA	NA	NA	NA	NA	NA	NA	NA	NA	NA	NA	1.03	1.22	0.8	NA	NA	NA	NA	NA	NA	NA	NA	NA	NA	NA	NA	NA	NA	NA	NA	NA	NA	NA
O14530	104	TXNDC9	TXND9_HUMAN Thioredoxin domain-containing protein 9 OS=Homo sapiens OX=9606 GN=TXNDC9 PE=1 SV=2	|DSTFRC(BTD[C])K	NA	NA	NA	NA	NA	NA	NA	NA	NA	NA	NA	NA	NA	NA	NA	NA	NA	NA	NA	NA	NA	NA	NA	NA	NA	NA	NA	NA	NA	0.78	NA	NA	NA	NA	NA	NA	NA	NA	NA	NA	NA	NA	NA	NA	NA
O14545	135	TRAFD1	TRAD1_HUMAN TRAF-type zinc finger domain-containing protein 1 OS=Homo sapiens OX=9606 GN=TRAFD1 PE=1 SV=1	THPEVC(BTD[C])GR|	NA	NA	NA	NA	NA	NA	NA	NA	1.06	NA	NA	NA	NA	NA	NA	NA	NA	NA	NA	NA	NA	NA	NA	NA	NA	NA	NA	NA	NA	NA	NA	NA	NA	NA	NA	NA	NA	NA	NA	NA	NA	NA	NA	NA	NA
O14561	140	NDUFAB1	ACPM_HUMAN Acyl carrier protein, mitochondrial OS=Homo sapiens OX=9606 GN=NDUFAB1 PE=1 SV=3	LMC(BTD[C])PQEIVDYIADKK|	NA	NA	NA	NA	NA	NA	NA	NA	NA	NA	NA	NA	NA	NA	NA	0.9	0.97	NA	NA	NA	NA	NA	NA	NA	NA	NA	NA	NA	NA	NA	NA	NA	NA	NA	NA	NA	1.15	NA	NA	NA	NA	NA	NA	NA	0.29
O14578	1688	CIT	CTRO_HUMAN Citron Rho-interacting kinase OS=Homo sapiens OX=9606 GN=CIT PE=1 SV=2	GC(BTD[C])HLFGAGK|	NA	NA	NA	NA	NA	NA	NA	NA	1.08	NA	NA	NA	NA	NA	NA	1.55	0.67	NA	NA	NA	NA	NA	NA	NA	NA	1.58	NA	NA	NA	NA	NA	NA	NA	NA	NA	NA	NA	NA	NA	NA	NA	NA	NA	NA	NA
O14578	1059	CIT	CTRO_HUMAN Citron Rho-interacting kinase OS=Homo sapiens OX=9606 GN=CIT PE=1 SV=2	SQFEC(BTD[C])R|	NA	NA	NA	NA	NA	NA	NA	NA	NA	NA	NA	NA	NA	NA	NA	NA	1.05	NA	NA	NA	NA	NA	NA	NA	NA	1.25	NA	NA	NA	NA	NA	NA	NA	NA	NA	NA	NA	NA	NA	NA	NA	NA	NA	NA	NA
O14613	92	CDC42EP2	BORG1_HUMAN Cdc42 effector protein 2 OS=Homo sapiens OX=9606 GN=CDC42EP2 PE=1 SV=1	|TATVC(BTD[C])GR	0.48	NA	NA	NA	0.34	NA	0.52	0.35	0.86	0.52	1.42	0.78	NA	NA	NA	0.71	0.45	0.86	0.86	NA	NA	NA	0.44	0.75	0.72	0.83	NA	NA	NA	NA	NA	NA	NA	NA	NA	NA	NA	NA	NA	NA	NA	NA	NA	NA	NA
O14617	60	AP3D1	AP3D1_HUMAN AP-3 complex subunit delta-1 OS=Homo sapiens OX=9606 GN=AP3D1 PE=1 SV=1	|ANAVC(BTD[C])K	NA	2.74	0.89	0.64	NA	1.12	0.52	NA	0.92	0.63	1.01	1	1.14	NA	NA	1.01	NA	1.07	1.15	NA	0.99	2.64	0.85	0.84	0.98	1.01	1.52	NA	NA	NA	NA	NA	NA	NA	NA	NA	NA	NA	NA	NA	NA	NA	NA	NA	NA
O14617	1153	AP3D1	AP3D1_HUMAN AP-3 complex subunit delta-1 OS=Homo sapiens OX=9606 GN=AP3D1 PE=1 SV=1	ATLAKC(BTD[C])|	NA	NA	0.99	NA	NA	0.81	NA	NA	1.01	NA	NA	1.02	NA	NA	NA	0.99	0.53	NA	NA	NA	1.06	NA	NA	0.75	NA	1.12	1.38	NA	2.78	NA	NA	NA	NA	NA	NA	NA	NA	NA	NA	NA	NA	NA	NA	NA	NA
O14617	574	AP3D1	AP3D1_HUMAN AP-3 complex subunit delta-1 OS=Homo sapiens OX=9606 GN=AP3D1 PE=1 SV=1	|ASC(BTD[C])ILQLVK	0.49	NA	NA	NA	NA	NA	0.81	0.53	NA	NA	NA	NA	NA	NA	NA	NA	NA	NA	NA	NA	NA	NA	0.86	NA	NA	NA	NA	NA	NA	NA	NA	NA	NA	NA	NA	NA	NA	NA	NA	NA	NA	NA	NA	NA	0.89
O14617	39	AP3D1	AP3D1_HUMAN AP-3 complex subunit delta-1 OS=Homo sapiens OX=9606 GN=AP3D1 PE=1 SV=1	|YISQC(BTD[C])IDEIKQELK	NA	NA	NA	NA	NA	NA	NA	NA	1.45	NA	NA	NA	NA	NA	NA	NA	NA	NA	NA	NA	NA	NA	NA	NA	NA	NA	NA	NA	NA	NA	NA	NA	NA	NA	NA	NA	NA	NA	NA	NA	NA	NA	NA	NA	NA
O14617	935	AP3D1	AP3D1_HUMAN AP-3 complex subunit delta-1 OS=Homo sapiens OX=9606 GN=AP3D1 PE=1 SV=1	MTC(BTD[C])DIR|	NA	NA	NA	NA	NA	NA	NA	NA	NA	NA	NA	NA	NA	NA	NA	NA	1.33	NA	NA	NA	NA	NA	NA	NA	NA	NA	NA	NA	NA	NA	NA	NA	NA	NA	NA	NA	NA	NA	NA	NA	NA	NA	NA	NA	NA
O14617	1103	AP3D1	AP3D1_HUMAN AP-3 complex subunit delta-1 OS=Homo sapiens OX=9606 GN=AP3D1 PE=1 SV=1	VDSC(BTD[C])ASMYSR|	NA	NA	NA	NA	NA	NA	NA	NA	NA	NA	NA	NA	NA	NA	NA	NA	NA	NA	NA	NA	NA	NA	NA	NA	0.88	NA	NA	NA	NA	NA	NA	NA	NA	NA	NA	NA	NA	NA	NA	NA	NA	NA	NA	NA	NA
O14618	227	CCS	CCS_HUMAN Copper chaperone for superoxide dismutase OS=Homo sapiens OX=9606 GN=CCS PE=1 SV=1	|LAC(BTD[C])GIIAR	NA	NA	NA	NA	NA	NA	NA	NA	NA	NA	NA	0.83	NA	NA	NA	NA	NA	NA	NA	NA	NA	NA	NA	0.74	0.72	NA	NA	NA	NA	NA	NA	NA	NA	NA	NA	NA	NA	NA	NA	NA	NA	NA	NA	NA	NA
O14633	20	LCE2B	LCE2B_HUMAN Late cornified envelope protein 2B OS=Homo sapiens OX=9606 GN=LCE2B PE=1 SV=1	|C(BTD[C])TPKCPPK	NA	NA	NA	NA	NA	NA	NA	NA	NA	NA	NA	NA	NA	NA	NA	NA	NA	NA	NA	NA	NA	NA	NA	NA	NA	NA	NA	NA	NA	NA	NA	NA	NA	NA	NA	NA	NA	NA	NA	NA	NA	NA	NA	NA	NA
O14646	454	CHD1	CHD1_HUMAN Chromodomain-helicase-DNA-binding protein 1 OS=Homo sapiens OX=9606 GN=CHD1 PE=1 SV=2	TTPFKDC(BTD[C])K|TTPFKDC(BTD[C])K	0.3	NA	0.94	NA	NA	1.46	NA	NA	1.05	NA	NA	0.97	NA	NA	NA	1.37	NA	1.16	NA	NA	0.92	NA	NA	0.99	1.02	NA	1.42	NA	NA	NA	NA	1.07	NA	NA	0.28	NA	NA	NA	NA	NA	0.68	NA	NA	NA	NA
O14646	1461	CHD1	CHD1_HUMAN Chromodomain-helicase-DNA-binding protein 1 OS=Homo sapiens OX=9606 GN=CHD1 PE=1 SV=2	|IGDHITEC(BTD[C])LK	NA	2.25	NA	NA	NA	2	NA	NA	NA	NA	NA	1.95	NA	NA	NA	NA	NA	1.7	NA	NA	1.45	1.94	NA	0.81	1.02	NA	NA	NA	NA	NA	NA	NA	NA	NA	NA	NA	NA	NA	NA	NA	NA	NA	NA	NA	NA
O14646	1417	CHD1	CHD1_HUMAN Chromodomain-helicase-DNA-binding protein 1 OS=Homo sapiens OX=9606 GN=CHD1 PE=1 SV=2	|TFSIC(BTD[C])K	NA	NA	NA	NA	NA	NA	NA	NA	NA	NA	NA	NA	NA	NA	NA	NA	0.79	NA	NA	NA	1.14	NA	NA	NA	1.01	NA	NA	NA	NA	NA	NA	NA	NA	NA	NA	NA	NA	NA	NA	NA	NA	NA	NA	NA	NA
O14646	1176	CHD1	CHD1_HUMAN Chromodomain-helicase-DNA-binding protein 1 OS=Homo sapiens OX=9606 GN=CHD1 PE=1 SV=2	|LGELVHNGC(BTD[C])IK	NA	4.24	NA	NA	NA	NA	NA	NA	NA	NA	NA	NA	NA	NA	NA	1.3	0.77	NA	NA	NA	NA	NA	NA	NA	NA	0.89	NA	NA	NA	NA	NA	NA	NA	NA	NA	NA	NA	NA	NA	NA	NA	NA	NA	NA	NA
O14647	1472	CHD2	CHD2_HUMAN Chromodomain-helicase-DNA-binding protein 2 OS=Homo sapiens OX=9606 GN=CHD2 PE=1 SV=2	|TFSIC(BTD[C])K	NA	NA	NA	NA	NA	NA	NA	NA	NA	NA	NA	NA	NA	NA	NA	NA	NA	NA	NA	NA	NA	NA	NA	NA	NA	NA	NA	NA	NA	NA	NA	NA	NA	NA	NA	NA	NA	NA	NA	NA	NA	NA	NA	NA	NA
O14653	18	GOSR2	GOSR2_HUMAN Golgi SNAP receptor complex member 2 OS=Homo sapiens OX=9606 GN=GOSR2 PE=1 SV=2	QVHEIQSC(BTD[C])MGR|	NA	2.39	1.21	0.48	NA	1	NA	NA	1.07	NA	0.95	0.85	NA	NA	1.45	NA	NA	1.28	0.68	NA	0.86	2.87	NA	0.56	NA	0.88	NA	NA	NA	NA	NA	NA	NA	NA	1.23	NA	0.75	0.67	NA	NA	NA	NA	NA	NA	NA
O14657	57	TOR1B	TOR1B_HUMAN Torsin-1B OS=Homo sapiens OX=9606 GN=TOR1B PE=1 SV=2	FAECC(BTD[C])R|	NA	NA	NA	NA	NA	NA	NA	NA	NA	NA	NA	NA	NA	NA	NA	NA	NA	NA	NA	NA	NA	NA	NA	NA	NA	NA	NA	NA	NA	NA	NA	NA	NA	NA	NA	NA	NA	NA	NA	NA	NA	NA	NA	NA	NA
O14662	150	STX16	STX16_HUMAN Syntaxin-16 OS=Homo sapiens OX=9606 GN=STX16 PE=1 SV=3	|AC(BTD[C])SEQEGR	NA	NA	NA	NA	NA	NA	NA	NA	NA	NA	NA	0.82	NA	NA	NA	0.77	0.92	NA	NA	NA	1.08	NA	NA	NA	NA	NA	NA	NA	NA	NA	NA	NA	NA	NA	NA	NA	NA	NA	NA	NA	NA	NA	NA	NA	NA
O14672	435	ADAM10	ADA10_HUMAN Disintegrin and metalloproteinase domain-containing protein 10 OS=Homo sapiens OX=9606 GN=ADAM10 PE=1 SV=1	|FSLC(BTD[C])SIR	NA	NA	NA	0.74	NA	NA	NA	NA	0.94	NA	NA	0.96	NA	NA	NA	NA	1.04	0.72	0.68	0.42	0.51	NA	NA	1.11	NA	0.67	NA	NA	NA	NA	NA	NA	NA	NA	NA	NA	NA	NA	NA	NA	NA	NA	NA	NA	NA
O14672	632	ADAM10	ADA10_HUMAN Disintegrin and metalloproteinase domain-containing protein 10 OS=Homo sapiens OX=9606 GN=ADAM10 PE=1 SV=1	TITLQPGSPC(BTD[C])NDFR|	NA	NA	NA	NA	NA	NA	NA	NA	NA	NA	NA	NA	NA	NA	NA	NA	NA	NA	NA	NA	NA	NA	NA	NA	NA	NA	NA	NA	NA	NA	NA	NA	NA	NA	NA	NA	NA	NA	NA	NA	NA	NA	NA	NA	NA
O14672	173	ADAM10	ADA10_HUMAN Disintegrin and metalloproteinase domain-containing protein 10 OS=Homo sapiens OX=9606 GN=ADAM10 PE=1 SV=1	YGPQGGC(BTD[C])ADHSVFER|YGPQGGC(BTD[C])ADHSVFER	NA	NA	NA	NA	NA	NA	NA	NA	NA	NA	NA	NA	NA	NA	NA	NA	NA	NA	NA	NA	NA	NA	NA	NA	NA	NA	NA	0.13	NA	NA	NA	NA	NA	NA	NA	NA	NA	0.41	NA	0.49	0.3	0.45	NA	0.54	NA
O14727	8	APAF1	APAF_HUMAN Apoptotic protease-activating factor 1 OS=Homo sapiens OX=9606 GN=APAF1 PE=1 SV=2	NC(BTD[C])LLQHR|	NA	1.57	1.16	NA	NA	NA	NA	0.64	NA	0.68	NA	0.98	NA	NA	NA	1.04	NA	1.22	NA	NA	NA	NA	0.75	1.67	NA	NA	NA	NA	NA	NA	NA	NA	NA	NA	1.28	NA	NA	NA	NA	NA	NA	NA	NA	NA	NA
O14727	450	APAF1	APAF_HUMAN Apoptotic protease-activating factor 1 OS=Homo sapiens OX=9606 GN=APAF1 PE=1 SV=2	|NC(BTD[C])SQLQDLHK	NA	NA	NA	NA	NA	NA	NA	NA	NA	NA	NA	NA	NA	NA	NA	NA	NA	NA	NA	NA	NA	NA	0.82	NA	NA	NA	NA	NA	NA	NA	NA	NA	NA	NA	NA	NA	NA	NA	NA	NA	NA	NA	NA	NA	NA
O14744	196	PRMT5	ANM5_HUMAN Protein arginine N-methyltransferase 5 OS=Homo sapiens OX=9606 GN=PRMT5 PE=1 SV=4	TLC(BTD[C])DYSK|TLC(BTD[C])DYSK	0.44	2.3	1.04	NA	NA	1.55	0.94	0.95	1.09	NA	NA	1.28	0.94	NA	1.58	1.13	0.59	1.36	0.79	NA	1.41	1.96	NA	1.01	0.94	NA	NA	NA	1.37	NA	NA	NA	0.87	NA	NA	0.72	NA	NA	0.9	NA	NA	0.84	NA	1.2	0.67
O14744	599	PRMT5	ANM5_HUMAN Protein arginine N-methyltransferase 5 OS=Homo sapiens OX=9606 GN=PRMT5 PE=1 SV=4	|EGQTIC(BTD[C])VR	NA	2.12	1.01	NA	0.32	1.18	NA	NA	0.95	NA	NA	0.92	NA	NA	NA	1.25	0.5	0.81	NA	NA	NA	NA	NA	NA	NA	0.95	NA	NA	NA	0.75	NA	NA	NA	NA	NA	NA	NA	0.55	NA	NA	0.37	NA	NA	NA	NA
O14745	206	SLC9A3R1	NHRF1_HUMAN Na(+)/H(+) exchange regulatory cofactor NHE-RF1 OS=Homo sapiens OX=9606 GN=SLC9A3R1 PE=1 SV=4	|IVEVNGVC(BTD[C])MEGK	NA	NA	NA	NA	NA	NA	NA	NA	NA	NA	NA	NA	NA	NA	NA	NA	NA	NA	NA	NA	1.05	NA	NA	NA	NA	NA	NA	NA	NA	NA	NA	NA	NA	NA	NA	NA	NA	NA	NA	NA	NA	NA	NA	NA	NA
O14746	89	TERT	TERT_HUMAN Telomerase reverse transcriptase OS=Homo sapiens OX=9606 GN=TERT PE=1 SV=1	|QRLC(BTD[C])ER	NA	NA	NA	NA	NA	NA	NA	NA	NA	NA	NA	NA	NA	NA	NA	NA	NA	NA	NA	NA	NA	NA	NA	NA	NA	NA	NA	NA	NA	NA	NA	NA	NA	NA	NA	NA	NA	NA	NA	NA	NA	NA	NA	NA	NA
O14757	392	CHEK1	CHK1_HUMAN Serine/threonine-protein kinase Chk1 OS=Homo sapiens OX=9606 GN=CHEK1 PE=1 SV=2	SYQC(BTD[C])LK|SYQC(BTD[C])LK	NA	NA	NA	NA	NA	1.06	NA	NA	NA	NA	NA	0.55	NA	NA	NA	NA	NA	NA	NA	NA	NA	NA	NA	NA	NA	0.96	NA	NA	NA	NA	NA	NA	NA	NA	NA	NA	NA	NA	NA	NA	NA	NA	NA	NA	NA
O14757	48	CHEK1	CHK1_HUMAN Serine/threonine-protein kinase Chk1 OS=Homo sapiens OX=9606 GN=CHEK1 PE=1 SV=2	AVDC(BTD[C])PENIKK|AVDC(BTD[C])PENIKK	0.38	NA	NA	NA	0.38	NA	0.49	NA	NA	NA	NA	0.81	NA	0.95	1.65	1.05	NA	NA	NA	NA	1.06	NA	0.66	NA	NA	NA	NA	NA	NA	1.06	NA	NA	1.2	0.83	1.26	0.52	0.86	NA	1.17	NA	0.75	0.77	NA	1.02	0.65
O14763	129	TNFRSF10B	TR10B_HUMAN Tumor necrosis factor receptor superfamily member 10B OS=Homo sapiens OX=9606 GN=TNFRSF10B PE=1 SV=2	|SPC(BTD[C])TTTR	NA	NA	NA	NA	0.97	NA	NA	NA	NA	NA	NA	NA	NA	NA	NA	NA	NA	NA	NA	NA	NA	NA	NA	NA	NA	NA	NA	NA	NA	NA	NA	NA	NA	NA	NA	NA	NA	NA	NA	NA	NA	NA	NA	NA	NA
O14763	248	TNFRSF10B	TR10B_HUMAN Tumor necrosis factor receptor superfamily member 10B OS=Homo sapiens OX=9606 GN=TNFRSF10B PE=1 SV=2	GIC(BTD[C])SGGGGDPER|	NA	NA	NA	NA	NA	NA	NA	NA	NA	NA	NA	NA	NA	NA	NA	NA	NA	NA	NA	NA	NA	NA	NA	NA	0.87	NA	NA	NA	NA	NA	NA	NA	1.49	NA	NA	NA	NA	1.99	NA	NA	NA	NA	NA	1.39	0.63
O14777	342	NDC80	NDC80_HUMAN Kinetochore protein NDC80 homolog OS=Homo sapiens OX=9606 GN=NDC80 PE=1 SV=1	VELEC(BTD[C])ETIKQENTR|	NA	NA	NA	NA	NA	NA	NA	NA	NA	NA	NA	1.19	NA	NA	NA	NA	NA	NA	NA	NA	NA	NA	NA	NA	1.41	NA	NA	NA	NA	NA	NA	NA	NA	NA	NA	NA	NA	NA	NA	NA	NA	NA	NA	NA	NA
O14777	95	NDC80	NDC80_HUMAN Kinetochore protein NDC80 homolog OS=Homo sapiens OX=9606 GN=NDC80 PE=1 SV=1	|AFIQQC(BTD[C])IR	NA	0.34	0.27	NA	NA	NA	NA	NA	NA	NA	NA	NA	NA	NA	NA	NA	NA	0.32	NA	NA	NA	NA	NA	NA	NA	NA	NA	NA	NA	NA	NA	NA	NA	NA	NA	NA	NA	NA	NA	NA	NA	NA	NA	NA	NA
O14777	449	NDC80	NDC80_HUMAN Kinetochore protein NDC80 homolog OS=Homo sapiens OX=9606 GN=NDC80 PE=1 SV=1	FNPEAGANC(BTD[C])LVK|	NA	NA	NA	NA	NA	NA	NA	NA	NA	NA	NA	0.96	NA	NA	NA	1.09	NA	NA	NA	NA	NA	NA	NA	1.02	NA	NA	NA	NA	NA	NA	NA	NA	NA	NA	NA	NA	NA	NA	NA	NA	NA	NA	NA	NA	NA
O14786	104	NRP1	NRP1_HUMAN Neuropilin-1 OS=Homo sapiens OX=9606 GN=NRP1 PE=1 SV=3	GKFC(BTD[C])GK|	NA	NA	NA	NA	NA	NA	NA	NA	0.91	NA	NA	NA	NA	NA	NA	NA	NA	NA	NA	NA	NA	1.36	NA	NA	NA	NA	NA	NA	NA	NA	NA	NA	NA	NA	NA	NA	NA	NA	NA	NA	NA	NA	NA	NA	NA
O14786	27	NRP1	NRP1_HUMAN Neuropilin-1 OS=Homo sapiens OX=9606 GN=NRP1 PE=1 SV=3	NDKC(BTD[C])GDTIK|	NA	NA	NA	NA	NA	NA	NA	NA	NA	NA	NA	NA	NA	NA	NA	NA	NA	NA	NA	NA	NA	NA	NA	NA	NA	NA	NA	NA	NA	NA	NA	NA	NA	NA	NA	NA	NA	0.77	NA	NA	NA	NA	NA	NA	NA
O14787	456	TNPO2	TNPO2_HUMAN Transportin-2 OS=Homo sapiens OX=9606 GN=TNPO2 PE=1 SV=3	SIAC(BTD[C])WTLSR|	NA	NA	NA	NA	NA	NA	NA	NA	NA	NA	NA	NA	NA	NA	NA	NA	NA	NA	NA	NA	1.57	NA	NA	NA	NA	NA	NA	NA	NA	NA	NA	NA	NA	NA	NA	NA	NA	NA	NA	NA	NA	NA	NA	NA	NA
O14787	195	TNPO2	TNPO2_HUMAN Transportin-2 OS=Homo sapiens OX=9606 GN=TNPO2 PE=1 SV=3	SHAIAC(BTD[C])VNQFIMDR|	NA	NA	NA	NA	NA	NA	NA	NA	NA	NA	NA	NA	NA	NA	NA	NA	NA	NA	NA	NA	NA	NA	NA	NA	NA	NA	NA	NA	NA	NA	NA	NA	NA	NA	NA	NA	NA	NA	NA	NA	NA	NA	NA	NA	NA
O14802	150	POLR3A	RPC1_HUMAN DNA-directed RNA polymerase III subunit RPC1 OS=Homo sapiens OX=9606 GN=POLR3A PE=1 SV=2	ISDKC(BTD[C])R|	NA	NA	NA	NA	NA	NA	NA	NA	NA	NA	NA	NA	NA	NA	NA	NA	NA	NA	NA	NA	NA	NA	NA	NA	NA	NA	NA	NA	NA	NA	NA	NA	NA	NA	NA	NA	NA	NA	NA	NA	NA	NA	NA	NA	NA
O14815	367	CAPN9	CAN9_HUMAN Calpain-9 OS=Homo sapiens OX=9606 GN=CAPN9 PE=1 SV=1	|GSTAGGC(BTD[C])R	NA	NA	NA	NA	NA	NA	NA	NA	NA	NA	NA	NA	NA	NA	NA	NA	NA	NA	NA	0.67	NA	NA	NA	NA	NA	NA	NA	NA	NA	NA	NA	NA	NA	NA	NA	NA	NA	NA	NA	NA	NA	NA	NA	NA	NA
O14817	190	TSPAN4	TSN4_HUMAN Tetraspanin-4 OS=Homo sapiens OX=9606 GN=TSPAN4 PE=1 SV=1	APC(BTD[C])YETVK|	NA	NA	0.64	0.75	NA	NA	0.7	NA	NA	NA	0.73	0.95	NA	NA	0.86	1.01	0.66	1.14	1.18	NA	0.63	NA	NA	0.92	0.76	0.88	NA	NA	NA	NA	NA	NA	1.38	NA	NA	NA	NA	2.41	0.93	2.3	1.56	NA	NA	1.86	1.38
O14818	91	PSMA7	PSA7_HUMAN Proteasome subunit alpha type-7 OS=Homo sapiens OX=9606 GN=PSMA7 PE=1 SV=1	VEC(BTD[C])QSHR|VEC(BTD[C])QSHR	0.32	3.89	0.65	0.42	0.35	1.34	0.41	0.34	0.83	0.58	0.68	0.74	0.85	1.19	1.73	0.76	0.42	0.69	0.6	0.42	0.7	2.57	0.42	0.56	0.59	0.81	1.56	0.12	3.97	0.09	0.09	NA	0.91	1.21	2.29	0.06	0.58	0.4	1.14	0.41	NA	0.46	NA	0.51	0.46
O14842	289	FFAR1	FFAR1_HUMAN Free fatty acid receptor 1 OS=Homo sapiens OX=9606 GN=FFAR1 PE=1 SV=1	|TVC(BTD[C])AAR	NA	NA	NA	NA	NA	NA	NA	NA	NA	NA	NA	NA	NA	NA	NA	NA	NA	NA	NA	NA	NA	NA	NA	NA	NA	NA	NA	NA	NA	NA	NA	NA	NA	NA	NA	NA	NA	NA	NA	NA	NA	NA	NA	NA	NA
O14879	158	IFIT3	IFIT3_HUMAN Interferon-induced protein with tetratricopeptide repeats 3 OS=Homo sapiens OX=9606 GN=IFIT3 PE=1 SV=1	AKVC(BTD[C])FEK|	NA	NA	NA	NA	NA	NA	NA	NA	NA	NA	NA	NA	NA	NA	NA	NA	NA	NA	NA	NA	NA	NA	NA	NA	NA	NA	NA	NA	NA	NA	0.68	NA	NA	NA	NA	NA	NA	NA	NA	NA	NA	NA	NA	NA	NA
O14879	239	IFIT3	IFIT3_HUMAN Interferon-induced protein with tetratricopeptide repeats 3 OS=Homo sapiens OX=9606 GN=IFIT3 PE=1 SV=1	SPC(BTD[C])QTDVLR|	NA	NA	NA	NA	1.06	1.27	1.39	NA	0.99	NA	NA	NA	0.65	NA	1.15	NA	NA	NA	NA	NA	1.07	NA	1.1	NA	NA	NA	NA	NA	NA	NA	NA	2.03	1.7	NA	NA	NA	NA	NA	1.13	NA	0.71	0.92	1.05	0.81	NA
O14880	56	MGST3	MGST3_HUMAN Microsomal glutathione S-transferase 3 OS=Homo sapiens OX=9606 GN=MGST3 PE=1 SV=1	STDPENGHIFNC(BTD[C])IQR|	NA	NA	NA	NA	NA	NA	NA	NA	1.24	NA	0.79	1.25	NA	NA	NA	0.92	1.32	NA	0.7	0.42	0.45	2.15	NA	NA	NA	0.92	NA	2.44	NA	NA	NA	NA	NA	NA	NA	NA	NA	0.47	NA	NA	0.55	NA	NA	0.95	NA
O14893	241	GEMIN2	GEMI2_HUMAN Gem-associated protein 2 OS=Homo sapiens OX=9606 GN=GEMIN2 PE=1 SV=1	RC(BTD[C])SEVR|RC(BTD[C])SEVR	NA	1.79	0.71	NA	0.59	1.02	NA	0.72	1.03	NA	NA	1.02	NA	NA	1.31	0.67	0.88	0.86	NA	NA	0.95	NA	NA	0.74	0.54	0.97	2.35	NA	NA	0.74	NA	NA	NA	1.03	1.48	NA	0.85	NA	NA	NA	NA	0.77	NA	1.05	NA
O14893	148	GEMIN2	GEMI2_HUMAN Gem-associated protein 2 OS=Homo sapiens OX=9606 GN=GEMIN2 PE=1 SV=1	KFC(BTD[C])LGEK|	NA	NA	NA	0.53	NA	NA	NA	NA	NA	NA	NA	NA	NA	NA	NA	NA	NA	0.79	NA	NA	1.23	NA	NA	NA	1.48	NA	NA	NA	NA	NA	NA	NA	NA	NA	NA	NA	NA	NA	NA	NA	NA	NA	NA	0.62	NA
O14893	264	GEMIN2	GEMI2_HUMAN Gem-associated protein 2 OS=Homo sapiens OX=9606 GN=GEMIN2 PE=1 SV=1	LC(BTD[C])LVSR|	NA	NA	NA	NA	NA	NA	NA	NA	NA	NA	NA	NA	NA	NA	NA	NA	NA	NA	NA	NA	NA	NA	NA	NA	NA	NA	NA	NA	NA	NA	NA	NA	NA	NA	NA	NA	NA	NA	NA	NA	NA	NA	NA	NA	NA
O14908	100	GIPC1	GIPC1_HUMAN PDZ domain-containing protein GIPC1 OS=Homo sapiens OX=9606 GN=GIPC1 PE=1 SV=2	LPTAEVMFC(BTD[C])TLNTHK|	NA	NA	1.06	NA	NA	0.98	NA	NA	1.54	NA	NA	NA	NA	NA	NA	0.79	0.98	0.98	NA	NA	NA	1.82	NA	1.08	NA	1.53	NA	NA	1.56	NA	NA	2.37	NA	NA	NA	0.5	1	NA	1	NA	NA	NA	NA	NA	NA
O14920	464	IKBKB	IKKB_HUMAN Inhibitor of nuclear factor kappa-B kinase subunit beta OS=Homo sapiens OX=9606 GN=IKBKB PE=1 SV=1	NNSC(BTD[C])LSK|	NA	NA	NA	NA	NA	NA	NA	NA	NA	NA	NA	NA	NA	NA	NA	NA	NA	NA	NA	NA	NA	NA	NA	NA	NA	NA	NA	NA	NA	NA	NA	NA	NA	NA	NA	NA	NA	NA	NA	NA	NA	NA	NA	NA	NA
O14929	168	HAT1	HAT1_HUMAN Histone acetyltransferase type B catalytic subunit OS=Homo sapiens OX=9606 GN=HAT1 PE=1 SV=1	ADMTC(BTD[C])R|ADMTC(BTD[C])R	0.46	2.61	0.78	0.58	0.44	1.09	0.63	0.54	0.89	0.66	NA	1.03	0.83	NA	1.43	0.98	0.65	1.01	NA	NA	1.13	2.18	0.65	0.89	0.82	1.15	1.54	NA	NA	NA	NA	1.2	1.01	NA	NA	NA	0.67	NA	1.16	NA	NA	NA	NA	NA	NA
O14929	27	HAT1	HAT1_HUMAN Histone acetyltransferase type B catalytic subunit OS=Homo sapiens OX=9606 GN=HAT1 PE=1 SV=1	LAEYKC(BTD[C])NTNTAIELK|	NA	1.73	NA	NA	0.48	1.37	0.5	NA	0.99	NA	1.03	0.76	NA	1.02	NA	1.09	NA	NA	NA	0.59	NA	0.98	0.6	0.71	0.81	1.02	NA	1.54	NA	NA	NA	1.13	NA	0.92	1.25	NA	1.2	0.77	1.15	NA	0.63	0.62	1.02	0.91	0.72
O14929	299	HAT1	HAT1_HUMAN Histone acetyltransferase type B catalytic subunit OS=Homo sapiens OX=9606 GN=HAT1 PE=1 SV=1	LCQDLPC(BTD[C])FSR|LCQDLPC(BTD[C])FSR	NA	NA	NA	NA	NA	NA	NA	NA	NA	NA	NA	NA	NA	NA	NA	NA	NA	NA	NA	NA	1.36	NA	NA	NA	NA	NA	NA	NA	NA	NA	NA	NA	NA	NA	NA	NA	NA	NA	NA	NA	NA	NA	NA	NA	NA
O14929	294	HAT1	HAT1_HUMAN Histone acetyltransferase type B catalytic subunit OS=Homo sapiens OX=9606 GN=HAT1 PE=1 SV=1	LC(BTD[C])QDLPCFSR|	NA	NA	NA	NA	NA	NA	NA	NA	NA	NA	NA	NA	NA	NA	NA	0.97	NA	NA	NA	NA	NA	NA	NA	NA	NA	NA	NA	NA	NA	NA	NA	NA	NA	NA	NA	NA	NA	NA	NA	NA	NA	NA	NA	NA	NA
O14936	146	CASK	CSKP_HUMAN Peripheral plasma membrane protein CASK OS=Homo sapiens OX=9606 GN=CASK PE=1 SV=3	DVKPHC(BTD[C])VLLASK|	NA	2.06	NA	NA	NA	NA	NA	NA	NA	NA	NA	NA	NA	NA	NA	NA	1.15	NA	NA	NA	NA	NA	NA	NA	NA	NA	NA	NA	NA	NA	NA	NA	NA	NA	NA	NA	NA	NA	NA	NA	NA	NA	NA	NA	NA
O14936	132	CASK	CSKP_HUMAN Peripheral plasma membrane protein CASK OS=Homo sapiens OX=9606 GN=CASK PE=1 SV=3	YC(BTD[C])HDNNIIHR|	NA	NA	0.98	NA	NA	NA	NA	NA	NA	NA	NA	NA	NA	NA	NA	NA	NA	NA	NA	NA	NA	NA	NA	0.92	NA	NA	NA	NA	NA	NA	NA	NA	NA	NA	NA	NA	NA	NA	NA	0.68	NA	NA	NA	NA	NA
O14964	75	HGS	HGS_HUMAN Hepatocyte growth factor-regulated tyrosine kinase substrate OS=Homo sapiens OX=9606 GN=HGS PE=1 SV=1	NC(BTD[C])GQTVHDEVANK|	0.49	2.53	0.92	0.74	0.44	1.16	0.81	0.68	1.2	NA	NA	1.26	1.02	NA	NA	1.02	0.69	1.61	1.14	0.8	1.14	1.75	0.73	1.07	0.9	1.03	2.68	NA	NA	NA	1.11	NA	NA	1.16	NA	0.76	1.28	0.75	0.9	1	1.05	1.22	NA	1.57	NA
O14964	190	HGS	HGS_HUMAN Hepatocyte growth factor-regulated tyrosine kinase substrate OS=Homo sapiens OX=9606 GN=HGS PE=1 SV=1	ACGQIFC(BTD[C])GK|	NA	NA	1.07	NA	NA	0.98	NA	NA	NA	NA	NA	1.13	NA	NA	NA	0.91	0.96	0.93	NA	NA	0.94	NA	NA	0.83	0.99	0.75	NA	NA	NA	NA	NA	NA	NA	NA	NA	NA	NA	NA	NA	NA	NA	NA	NA	NA	NA
O14964	185	HGS	HGS_HUMAN Hepatocyte growth factor-regulated tyrosine kinase substrate OS=Homo sapiens OX=9606 GN=HGS PE=1 SV=1	AC(BTD[C])GQIFCGK|	NA	0.99	NA	NA	NA	NA	NA	NA	NA	NA	NA	NA	NA	NA	NA	0.96	NA	1.05	NA	NA	1.17	NA	NA	NA	1.02	0.93	NA	NA	NA	NA	NA	NA	NA	NA	NA	NA	NA	NA	NA	NA	NA	NA	NA	NA	NA
O14965	8	AURKA	AURKA_HUMAN Aurora kinase A OS=Homo sapiens OX=9606 GN=AURKA PE=1 SV=2	SKENC(BTD[C])ISGPVK|	NA	NA	0.67	0.7	NA	1.04	NA	NA	NA	NA	0.69	0.82	0.73	NA	1.35	0.79	NA	0.86	0.64	0.5	NA	NA	0.26	0.73	0.73	NA	1.08	0.85	NA	NA	1.36	1.57	1.37	0.95	1.26	1.09	0.76	NA	1.12	0.47	0.45	0.49	NA	0.76	0.29
O14965	393	AURKA	AURKA_HUMAN Aurora kinase A OS=Homo sapiens OX=9606 GN=AURKA PE=1 SV=2	PSNC(BTD[C])QNK|	NA	NA	NA	NA	NA	0.94	NA	NA	NA	NA	NA	0.49	NA	NA	NA	0.75	NA	NA	NA	NA	NA	NA	NA	NA	0.41	NA	1	NA	NA	NA	NA	NA	1.09	NA	NA	NA	NA	NA	NA	NA	NA	NA	NA	NA	NA
O14965	49	AURKA	AURKA_HUMAN Aurora kinase A OS=Homo sapiens OX=9606 GN=AURKA PE=1 SV=2	|VLC(BTD[C])PSNSSQR	NA	NA	NA	NA	NA	NA	NA	NA	NA	NA	NA	NA	NA	NA	NA	NA	1.08	1.27	NA	NA	0.73	NA	NA	NA	1.01	NA	1.2	NA	NA	NA	NA	NA	NA	NA	NA	NA	NA	0.66	NA	NA	NA	NA	NA	NA	NA
O14967	511	CLGN	CLGN_HUMAN Calmegin OS=Homo sapiens OX=9606 GN=CLGN PE=1 SV=1	KTDIC(BTD[C])IPQTK|	0.45	2.13	0.75	0.59	NA	0.98	NA	0.67	1.06	0.96	0.88	0.74	0.47	0.96	1.72	0.8	0.67	0.93	0.57	0.44	0.99	2.16	0.55	0.69	0.76	0.93	0.97	4.37	3.29	0.82	1.19	1.48	1.29	0.87	1.04	0.56	1	0.68	0.77	0.94	0.72	0.77	1.83	0.85	0.66
O14974	553	PPP1R12A	MYPT1_HUMAN Protein phosphatase 1 regulatory subunit 12A OS=Homo sapiens OX=9606 GN=PPP1R12A PE=1 SV=1	SC(BTD[C])SFGR|	NA	NA	NA	NA	NA	NA	NA	NA	NA	NA	NA	NA	NA	NA	NA	NA	NA	0.59	NA	NA	NA	NA	NA	NA	1.01	NA	NA	NA	NA	NA	NA	NA	NA	NA	NA	NA	NA	NA	NA	NA	NA	NA	NA	NA	NA
O14975	320	SLC27A2	S27A2_HUMAN Very long-chain acyl-CoA synthetase OS=Homo sapiens OX=9606 GN=SLC27A2 PE=1 SV=2	|YLC(BTD[C])NSPQKPNDR	NA	NA	NA	NA	NA	NA	NA	NA	NA	NA	NA	NA	NA	NA	NA	NA	NA	NA	NA	NA	NA	NA	NA	NA	NA	0.35	NA	NA	NA	NA	NA	NA	NA	NA	NA	NA	NA	NA	NA	NA	NA	NA	NA	NA	NA
O14979	303	HNRNPDL	HNRDL_HUMAN Heterogeneous nuclear ribonucleoprotein D-like OS=Homo sapiens OX=9606 GN=HNRNPDL PE=1 SV=3	YHQIGSGKC(BTD[C])EIK|YHQIGSGKC(BTD[C])EIK	NA	1.65	0.79	NA	0.5	1.61	0.58	0.51	0.89	NA	0.9	1.23	0.92	NA	2.23	1.15	0.72	1.06	0.58	0.47	0.99	1.41	0.86	0.89	0.77	1.24	1.66	NA	3.41	0.96	0.67	NA	NA	1.04	2.14	NA	0.55	0.33	NA	0.52	NA	NA	NA	0.4	1
O14979	277	HNRNPDL	HNRDL_HUMAN Heterogeneous nuclear ribonucleoprotein D-like OS=Homo sapiens OX=9606 GN=HNRNPDL PE=1 SV=3	GFC(BTD[C])FITYTDEEPVKK|	NA	NA	NA	NA	NA	NA	NA	NA	NA	NA	NA	1.02	NA	1.14	NA	NA	NA	NA	NA	NA	1.17	NA	NA	1.04	1.03	NA	NA	NA	NA	NA	NA	2.16	1.35	1.05	NA	NA	1.25	0.49	NA	0.5	NA	0.73	NA	NA	NA
O14979	177	HNRNPDL	HNRDL_HUMAN Heterogeneous nuclear ribonucleoprotein D-like OS=Homo sapiens OX=9606 GN=HNRNPDL PE=1 SV=3	FGEVVDC(BTD[C])TIKTDPVTGR|	NA	NA	NA	NA	NA	NA	NA	NA	NA	NA	NA	NA	NA	NA	NA	NA	NA	NA	NA	NA	NA	NA	NA	NA	NA	NA	NA	NA	NA	NA	NA	NA	NA	NA	NA	NA	NA	NA	NA	NA	NA	NA	NA	NA	NA
O14980	119	XPO1	XPO1_HUMAN Exportin-1 OS=Homo sapiens OX=9606 GN=XPO1 PE=1 SV=1	TSSDPTC(BTD[C])VEK|TSSDPTC(BTD[C])VEKEK TSSDPTC(BTD[C])VEK	0.58	3.05	1.06	NA	0.69	1.38	0.78	0.64	0.96	0.75	NA	1.16	NA	NA	0.88	1.16	0.97	1.2	NA	NA	1.19	2.47	1.17	1.02	0.86	1.2	2.35	NA	1.37	0.49	NA	2.6	0.92	NA	NA	0.36	0.93	0.82	NA	NA	0.73	0.89	NA	1.11	NA
O14980	528	XPO1	XPO1_HUMAN Exportin-1 OS=Homo sapiens OX=9606 GN=XPO1 PE=1 SV=1	|DLLGLC(BTD[C])EQKR	NA	NA	NA	NA	NA	NA	NA	NA	1.29	NA	NA	1.06	NA	0.95	NA	1.03	0.85	1.13	NA	0.31	NA	NA	NA	0.76	0.62	1.17	NA	NA	NA	NA	NA	2	0.78	0.63	NA	NA	1.22	NA	0.93	NA	NA	NA	NA	0.95	0.86
O14980	99	XPO1	XPO1_HUMAN Exportin-1 OS=Homo sapiens OX=9606 GN=XPO1 PE=1 SV=1	NQC(BTD[C])EGIKK|NQC(BTD[C])EGIKK	0.29	2.63	0.53	0.65	0.3	1.19	NA	0.35	0.78	NA	0.72	0.93	NA	1.01	1.7	0.81	0.53	0.54	NA	0.47	0.7	2.84	0.37	0.51	0.52	0.85	1.28	4.62	4.9	0.88	0.6	NA	1.35	0.87	1.31	0.41	0.99	1.17	1.21	0.75	NA	0.73	NA	0.91	0.56
O14980	164	XPO1	XPO1_HUMAN Exportin-1 OS=Homo sapiens OX=9606 GN=XPO1 PE=1 SV=1	|TSESLC(BTD[C])QNNMVILK	NA	NA	0.78	NA	NA	NA	NA	0.68	NA	NA	NA	0.8	NA	NA	NA	0.83	0.84	1.04	NA	NA	NA	NA	0.63	0.82	0.65	1.2	NA	NA	1.61	NA	NA	NA	NA	NA	NA	NA	NA	NA	NA	NA	NA	NA	NA	NA	NA
O14981	914	BTAF1	BTAF1_HUMAN TATA-binding protein-associated factor 172 OS=Homo sapiens OX=9606 GN=BTAF1 PE=1 SV=2	TPC(BTD[C])PNSK|	NA	NA	NA	NA	NA	NA	NA	NA	NA	NA	NA	0.4	NA	NA	NA	NA	NA	0.47	NA	NA	NA	NA	NA	NA	NA	0.43	0.5	NA	NA	NA	NA	1.94	1.57	1.11	NA	NA	NA	1.37	1.38	0.71	1.02	0.75	NA	NA	NA
O15013	616	ARHGEF10	ARHGA_HUMAN Rho guanine nucleotide exchange factor 10 OS=Homo sapiens OX=9606 GN=ARHGEF10 PE=1 SV=4	DADQRC(BTD[C])EVK|	NA	NA	NA	NA	NA	0.91	NA	NA	NA	NA	NA	0.96	NA	NA	NA	NA	0.77	NA	NA	NA	1	NA	NA	0.86	NA	1.03	NA	NA	NA	NA	NA	NA	NA	NA	NA	NA	NA	NA	NA	NA	NA	NA	NA	NA	NA
O15014	1290	ZNF609	ZN609_HUMAN Zinc finger protein 609 OS=Homo sapiens OX=9606 GN=ZNF609 PE=1 SV=2	|ASPSVTC(BTD[C])K	NA	NA	NA	NA	NA	NA	NA	NA	NA	NA	NA	NA	NA	NA	NA	NA	NA	NA	NA	NA	NA	NA	NA	NA	NA	NA	NA	NA	NA	NA	NA	NA	NA	NA	NA	NA	NA	NA	NA	NA	NA	NA	NA	NA	NA
O15020	115	SPTBN2	SPTN2_HUMAN Spectrin beta chain, non-erythrocytic 2 OS=Homo sapiens OX=9606 GN=SPTBN2 PE=1 SV=3	|IHC(BTD[C])LENVDK	NA	NA	NA	NA	NA	NA	NA	NA	NA	0.41	NA	NA	NA	NA	NA	NA	NA	NA	NA	NA	NA	NA	NA	NA	NA	NA	NA	NA	NA	NA	NA	NA	NA	NA	NA	NA	NA	NA	NA	NA	NA	NA	NA	NA	NA
O15027	1451	SEC16A	SC16A_HUMAN Protein transport protein Sec16A OS=Homo sapiens OX=9606 GN=SEC16A PE=1 SV=4	FSVPHVC(BTD[C])AR|FSVPHVC(BTD[C])AR	NA	2.07	0.88	NA	NA	1.52	NA	NA	1.45	NA	NA	1.16	NA	NA	NA	1.04	0.88	1.72	NA	NA	1.75	NA	NA	1.16	NA	NA	NA	NA	NA	NA	NA	NA	NA	NA	NA	NA	NA	NA	NA	NA	NA	NA	NA	NA	NA
O15031	1484	PLXNB2	PLXB2_HUMAN Plexin-B2 OS=Homo sapiens OX=9606 GN=PLXNB2 PE=1 SV=3	|VLNC(BTD[C])DTISQVK	NA	NA	NA	NA	NA	NA	NA	NA	NA	NA	NA	NA	NA	NA	NA	NA	NA	NA	NA	NA	NA	NA	NA	NA	NA	NA	NA	NA	NA	NA	NA	NA	NA	NA	NA	NA	NA	NA	NA	NA	NA	NA	NA	NA	NA
O15042	653	U2SURP	SR140_HUMAN U2 snRNP-associated SURP motif-containing protein OS=Homo sapiens OX=9606 GN=U2SURP PE=1 SV=2	|	NA	1.74	1.13	0.33	NA	1.4	NA	NA	1.36	NA	0.63	1.6	0.91	NA	NA	1.11	0.67	1.2	NA	0.33	1.17	1.69	NA	1.03	0.92	1.18	NA	NA	NA	1.02	NA	NA	NA	NA	NA	NA	NA	NA	NA	NA	NA	NA	NA	NA	NA
O15042	65	U2SURP	SR140_HUMAN U2 snRNP-associated SURP motif-containing protein OS=Homo sapiens OX=9606 GN=U2SURP PE=1 SV=2	ESLC(BTD[C])DSPHQNLSR|ESLC(BTD[C])DSPHQNLSR	0.45	NA	NA	NA	0.54	1.22	NA	0.54	NA	NA	NA	0.94	2.77	0.78	1.09	1.04	NA	1.01	1.09	NA	1.17	NA	0.57	NA	0.88	1.09	0.78	NA	2.28	NA	NA	1.58	1.08	0.76	NA	NA	0.89	0.58	0.76	0.63	0.54	0.72	0.98	0.95	0.57
O15042	918	U2SURP	SR140_HUMAN U2 snRNP-associated SURP motif-containing protein OS=Homo sapiens OX=9606 GN=U2SURP PE=1 SV=2	|EKDEC(BTD[C])TPTR	NA	NA	NA	NA	NA	NA	NA	NA	NA	NA	NA	NA	NA	NA	NA	NA	NA	NA	NA	NA	NA	NA	NA	NA	NA	NA	NA	NA	NA	NA	NA	NA	1.16	NA	NA	2.77	NA	NA	NA	NA	NA	NA	NA	NA	NA
O15067	502	PFAS	PUR4_HUMAN Phosphoribosylformylglycinamidine synthase OS=Homo sapiens OX=9606 GN=PFAS PE=1 SV=4	AC(BTD[C])VEAPK|AC(BTD[C])VEAPK	NA	NA	1.23	NA	0.96	NA	NA	NA	NA	0.94	NA	NA	0.78	NA	NA	1.26	NA	NA	NA	NA	NA	NA	NA	1.02	1.21	NA	NA	NA	NA	NA	NA	NA	NA	NA	NA	NA	NA	NA	NA	NA	NA	NA	NA	NA	NA
O15067	270	PFAS	PUR4_HUMAN Phosphoribosylformylglycinamidine synthase OS=Homo sapiens OX=9606 GN=PFAS PE=1 SV=4	FC(BTD[C])DNSSAIQGK|FC(BTD[C])DNSSAIQGK	0.68	2.78	0.7	0.51	0.54	1.19	0.89	0.85	1.05	0.57	NA	0.76	NA	NA	1.63	0.63	NA	0.85	0.75	NA	NA	1.72	0.78	NA	NA	NA	1.31	NA	NA	NA	NA	NA	NA	1.02	NA	NA	0.81	0.89	NA	NA	NA	0.96	NA	0.92	0.71
O15067	584	PFAS	PUR4_HUMAN Phosphoribosylformylglycinamidine synthase OS=Homo sapiens OX=9606 GN=PFAS PE=1 SV=4	|ERC(BTD[C])PACFVGTITGDR	NA	NA	NA	0.56	NA	NA	NA	NA	NA	NA	NA	NA	NA	NA	NA	NA	NA	NA	0.72	0.44	0.63	NA	NA	NA	0.84	NA	NA	NA	NA	NA	NA	NA	NA	NA	NA	0.83	NA	NA	NA	NA	NA	NA	NA	NA	NA
O15067	606	PFAS	PUR4_HUMAN Phosphoribosylformylglycinamidine synthase OS=Homo sapiens OX=9606 GN=PFAS PE=1 SV=4	IVLVDDREC(BTD[C])PVR|	0.5	2.18	0.76	NA	0.46	1.2	0.5	NA	0.93	NA	NA	NA	0.87	0.68	1.52	1.1	0.83	0.98	0.58	NA	0.95	2.19	0.74	1.01	0.76	1.05	0.99	8.08	NA	1.06	1.64	1.28	0.9	0.94	1.04	0.69	0.68	1.28	1	0.95	NA	0.72	NA	1.07	NA
O15067	512	PFAS	PUR4_HUMAN Phosphoribosylformylglycinamidine synthase OS=Homo sapiens OX=9606 GN=PFAS PE=1 SV=4	GNPIC(BTD[C])SLHDQGAGGNGNVLK|GNPIC(BTD[C])SLHDQGAGGNGNVLK	NA	NA	0.93	NA	NA	NA	NA	NA	NA	NA	NA	NA	NA	NA	NA	NA	NA	NA	NA	NA	NA	NA	NA	NA	1	NA	NA	NA	0.89	NA	NA	NA	NA	NA	NA	NA	NA	NA	NA	NA	NA	NA	NA	NA	NA
O15067	336	PFAS	PUR4_HUMAN Phosphoribosylformylglycinamidine synthase OS=Homo sapiens OX=9606 GN=PFAS PE=1 SV=4	|DVQC(BTD[C])TGR	NA	NA	1.23	NA	NA	NA	NA	NA	1.06	NA	NA	1.34	NA	NA	NA	1.14	1.38	NA	NA	NA	NA	NA	NA	1.24	0.81	NA	NA	NA	NA	NA	NA	NA	NA	NA	NA	NA	NA	NA	NA	NA	NA	NA	NA	NA	NA
O15067	1044	PFAS	PUR4_HUMAN Phosphoribosylformylglycinamidine synthase OS=Homo sapiens OX=9606 GN=PFAS PE=1 SV=4	MGPSYC(BTD[C])LPPTFPK|	NA	NA	NA	NA	NA	NA	1.07	0.7	NA	NA	NA	NA	NA	NA	NA	NA	NA	NA	NA	NA	NA	NA	NA	NA	NA	NA	NA	NA	NA	NA	NA	NA	NA	NA	NA	NA	NA	NA	NA	NA	NA	NA	NA	NA	NA
O15067	108	PFAS	PUR4_HUMAN Phosphoribosylformylglycinamidine synthase OS=Homo sapiens OX=9606 GN=PFAS PE=1 SV=4	LNFSTPTSTNIVSVC(BTD[C])R|	NA	NA	NA	NA	NA	NA	NA	NA	NA	NA	NA	NA	NA	NA	NA	NA	NA	NA	NA	NA	0.96	NA	NA	NA	0.76	NA	NA	NA	NA	NA	NA	NA	NA	NA	NA	NA	NA	NA	NA	NA	NA	NA	NA	NA	NA
O15067	975	PFAS	PUR4_HUMAN Phosphoribosylformylglycinamidine synthase OS=Homo sapiens OX=9606 GN=PFAS PE=1 SV=4	|DAGLHC(BTD[C])LELGHTGEAGPHAMVR	NA	NA	NA	NA	NA	NA	NA	NA	NA	NA	NA	NA	NA	NA	NA	NA	NA	NA	NA	NA	NA	NA	NA	NA	NA	NA	NA	NA	NA	NA	0.47	NA	NA	NA	NA	0.91	NA	NA	NA	NA	NA	NA	NA	NA	NA
O15118	1261	NPC1	NPC1_HUMAN NPC intracellular cholesterol transporter 1 OS=Homo sapiens OX=9606 GN=NPC1 PE=1 SV=2	SC(BTD[C])ATEER|SC(BTD[C])ATEER	NA	2.98	NA	NA	0.78	2.22	0.8	NA	0.87	NA	0.81	1.13	NA	NA	0.9	NA	NA	1.22	NA	NA	1.26	NA	0.52	1.11	1.69	1.12	2.11	NA	NA	NA	NA	NA	NA	0.68	NA	NA	0.78	1.05	NA	NA	1.19	1.03	1.92	1	0.8
O15118	979	NPC1	NPC1_HUMAN NPC intracellular cholesterol transporter 1 OS=Homo sapiens OX=9606 GN=NPC1 PE=1 SV=2	C(BTD[C])RPLTPEGK|	NA	NA	NA	NA	NA	NA	NA	NA	NA	NA	NA	NA	NA	NA	NA	NA	NA	NA	NA	NA	NA	NA	NA	NA	NA	NA	NA	NA	NA	NA	NA	NA	NA	NA	NA	NA	NA	NA	NA	NA	NA	NA	NA	NA	NA
O15118	177	NPC1	NPC1_HUMAN NPC intracellular cholesterol transporter 1 OS=Homo sapiens OX=9606 GN=NPC1 PE=1 SV=2	|ALGLLC(BTD[C])GK	NA	NA	0.39	NA	NA	NA	NA	NA	NA	NA	NA	1.02	NA	NA	NA	NA	0.58	0.53	NA	NA	0.52	NA	NA	0.55	NA	NA	NA	NA	NA	NA	NA	NA	NA	NA	NA	NA	NA	NA	NA	NA	NA	NA	NA	NA	NA
O15143	70	ARPC1B	ARC1B_HUMAN Actin-related protein 2/3 complex subunit 1B OS=Homo sapiens OX=9606 GN=ARPC1B PE=1 SV=3	IVTC(BTD[C])GTDR|IVTC(BTD[C])GTDR	0.53	2.02	NA	0.43	0.39	1.35	0.67	0.65	0.83	0.45	0.8	0.99	NA	NA	0.96	NA	0.43	0.92	0.88	0.48	0.85	1.81	0.56	0.65	0.7	0.9	1.24	0.18	NA	NA	NA	NA	0.97	0.84	NA	NA	NA	NA	1.05	NA	0.45	NA	NA	NA	NA
O15143	227	ARPC1B	ARC1B_HUMAN Actin-related protein 2/3 complex subunit 1B OS=Homo sapiens OX=9606 GN=ARPC1B PE=1 SV=3	VAWVSHDSTVC(BTD[C])LADADKK|	NA	3.14	0.97	NA	NA	NA	NA	NA	0.7	NA	NA	NA	NA	NA	1.07	NA	NA	NA	NA	NA	1.05	1.71	NA	NA	NA	NA	NA	NA	NA	NA	NA	NA	NA	0.65	NA	NA	1.13	NA	NA	NA	NA	NA	NA	NA	0.97
O15143	13	ARPC1B	ARC1B_HUMAN Actin-related protein 2/3 complex subunit 1B OS=Homo sapiens OX=9606 GN=ARPC1B PE=1 SV=3	|LVEPISC(BTD[C])HAWNK	NA	NA	0.94	NA	NA	NA	NA	NA	NA	NA	NA	NA	NA	NA	NA	NA	0.87	NA	NA	NA	NA	1.32	NA	NA	NA	NA	NA	0.9	NA	NA	NA	NA	NA	NA	NA	NA	NA	NA	NA	NA	NA	NA	NA	NA	NA
O15144	120	ARPC2	ARPC2_HUMAN Actin-related protein 2/3 complex subunit 2 OS=Homo sapiens OX=9606 GN=ARPC2 PE=1 SV=1	NC(BTD[C])FASVFEK|	0.85	NA	0.91	NA	0.81	NA	0.98	0.86	NA	0.46	NA	1.19	NA	NA	NA	0.91	0.76	NA	NA	NA	NA	NA	1.15	1.18	NA	1	NA	0.29	NA	0.37	0.33	NA	NA	NA	NA	0.2	NA	0.56	NA	0.58	NA	0.83	NA	0.87	0.66
O15145	85	ARPC3	ARPC3_HUMAN Actin-related protein 2/3 complex subunit 3 OS=Homo sapiens OX=9606 GN=ARPC3 PE=1 SV=3	LQKC(BTD[C])NSK|LQKC(BTD[C])NSK	0.22	3.93	0.54	0.8	0.2	NA	NA	0.31	1.56	NA	0.51	0.58	0.69	1.74	0.95	0.88	0.63	0.94	0.49	0.45	0.59	NA	NA	0.46	0.64	0.72	1.11	0.33	5.44	0.45	0.37	3.66	NA	1.28	2.69	0.24	1.05	0.38	1.36	0.66	0.79	NA	0.66	NA	0.48
O15145	145	ARPC3	ARPC3_HUMAN Actin-related protein 2/3 complex subunit 3 OS=Homo sapiens OX=9606 GN=ARPC3 PE=1 SV=3	QETGLRLC(BTD[C])EK|QETGLRLC(BTD[C])EK	0.62	NA	NA	NA	0.23	NA	1.01	NA	NA	NA	NA	NA	NA	NA	NA	NA	NA	NA	NA	NA	NA	NA	0.65	NA	NA	NA	NA	NA	NA	0.1	0.17	NA	NA	NA	NA	NA	NA	NA	NA	NA	NA	NA	NA	NA	NA
O15162	254	PLSCR1	PLS1_HUMAN Phospholipid scramblase 1 OS=Homo sapiens OX=9606 GN=PLSCR1 PE=1 SV=1	|SLDEQC(BTD[C])VVGK	NA	1.49	NA	NA	NA	NA	NA	NA	0.9	NA	0.65	0.86	0.61	NA	1.04	0.99	NA	1	0.98	0.61	NA	1.18	NA	NA	1.01	0.6	NA	1.37	NA	NA	NA	1.05	1.52	0.92	NA	NA	NA	0.45	NA	0.54	0.34	0.7	NA	NA	0.36
O15173	159	PGRMC2	PGRC2_HUMAN Membrane-associated progesterone receptor component 2 OS=Homo sapiens OX=9606 GN=PGRMC2 PE=1 SV=1	|GLATFC(BTD[C])LDK	NA	NA	1.11	0.65	NA	NA	NA	NA	NA	NA	NA	0.99	NA	NA	NA	1.05	1.03	NA	NA	NA	1.04	NA	0.92	0.9	1.15	1.12	NA	NA	1.95	NA	NA	1.65	1.15	1.03	NA	1.38	0.58	0.85	2.03	0.98	0.87	0.52	NA	0.74	0.76
O15213	515	WDR46	WDR46_HUMAN WD repeat-containing protein 46 OS=Homo sapiens OX=9606 GN=WDR46 PE=1 SV=3	VPAELIC(BTD[C])LDPR|	NA	NA	NA	NA	NA	NA	NA	NA	NA	NA	NA	NA	NA	NA	NA	NA	NA	NA	NA	NA	NA	NA	NA	NA	0.58	NA	NA	NA	NA	NA	NA	NA	NA	NA	NA	NA	NA	NA	NA	NA	NA	NA	NA	NA	NA
O15226	424	NKRF	NKRF_HUMAN NF-kappa-B-repressing factor OS=Homo sapiens OX=9606 GN=NKRF PE=1 SV=2	SSQC(BTD[C])HTGSSPR|SSQC(BTD[C])HTGSSPR	0.56	NA	0.89	NA	0.3	NA	0.5	0.36	0.9	NA	NA	0.93	NA	1.19	1.88	0.85	0.77	0.88	NA	NA	0.76	2.26	0.39	NA	NA	0.68	NA	5.21	NA	NA	NA	1.46	1.36	1.03	1.05	NA	0.59	0.57	NA	0.87	0.79	0.58	2.47	0.83	0.95
O15226	386	NKRF	NKRF_HUMAN NF-kappa-B-repressing factor OS=Homo sapiens OX=9606 GN=NKRF PE=1 SV=2	VFLQDHC(BTD[C])LAEGYGTK|	NA	NA	NA	NA	NA	NA	NA	NA	NA	NA	NA	NA	NA	NA	NA	NA	NA	NA	NA	NA	NA	NA	NA	NA	NA	NA	NA	NA	NA	NA	NA	NA	NA	NA	NA	NA	NA	NA	NA	NA	NA	NA	NA	NA	0.55
O15228	138	GNPAT	GNPAT_HUMAN Dihydroxyacetone phosphate acyltransferase OS=Homo sapiens OX=9606 GN=GNPAT PE=1 SV=1	VC(BTD[C])VNEEGIQK|	NA	NA	NA	NA	NA	NA	NA	NA	NA	NA	NA	0.88	NA	NA	NA	0.91	NA	0.66	NA	NA	NA	NA	NA	NA	NA	NA	NA	NA	NA	NA	NA	NA	NA	NA	NA	NA	NA	NA	NA	NA	NA	NA	NA	NA	NA
O15228	635	GNPAT	GNPAT_HUMAN Dihydroxyacetone phosphate acyltransferase OS=Homo sapiens OX=9606 GN=GNPAT PE=1 SV=1	NALAAC(BTD[C])VR|	NA	NA	NA	NA	NA	0.9	NA	NA	NA	NA	NA	0.56	NA	NA	NA	NA	NA	NA	NA	NA	NA	NA	NA	NA	0.7	NA	NA	NA	NA	NA	7.03	NA	NA	NA	NA	NA	NA	NA	NA	NA	NA	NA	NA	NA	NA
O15228	66	GNPAT	GNPAT_HUMAN Dihydroxyacetone phosphate acyltransferase OS=Homo sapiens OX=9606 GN=GNPAT PE=1 SV=1	GITPC(BTD[C])KPIDIK|	NA	2.67	NA	NA	NA	NA	NA	NA	0.8	NA	NA	NA	NA	NA	NA	NA	0.96	0.42	NA	NA	0.72	NA	NA	0.76	NA	NA	1.8	NA	NA	NA	NA	NA	NA	NA	NA	NA	NA	NA	NA	NA	NA	NA	NA	NA	NA
O15228	668	GNPAT	GNPAT_HUMAN Dihydroxyacetone phosphate acyltransferase OS=Homo sapiens OX=9606 GN=GNPAT PE=1 SV=1	LEEMLGC(BTD[C])K|	NA	NA	NA	NA	NA	NA	NA	NA	NA	NA	NA	NA	NA	NA	NA	NA	NA	NA	NA	NA	NA	NA	NA	NA	NA	0.96	NA	NA	NA	NA	NA	NA	NA	NA	NA	NA	NA	NA	NA	NA	NA	NA	NA	NA	NA
O15228	650	GNPAT	GNPAT_HUMAN Dihydroxyacetone phosphate acyltransferase OS=Homo sapiens OX=9606 GN=GNPAT PE=1 SV=1	|INNNC(BTD[C])IFNVNEPATTK	NA	NA	NA	NA	NA	NA	NA	NA	NA	NA	NA	0.89	NA	NA	NA	NA	NA	NA	NA	NA	NA	NA	NA	NA	NA	NA	NA	NA	NA	NA	NA	NA	NA	NA	NA	NA	NA	NA	NA	NA	NA	NA	NA	NA	NA
O15231	681	ZNF185	ZN185_HUMAN Zinc finger protein 185 OS=Homo sapiens OX=9606 GN=ZNF185 PE=1 SV=3	DTIHC(BTD[C])GK|	NA	1.77	NA	NA	1.09	NA	NA	NA	0.93	NA	NA	NA	NA	NA	NA	NA	0.6	0.73	NA	NA	0.98	NA	NA	NA	0.71	NA	NA	NA	NA	NA	NA	NA	NA	NA	NA	NA	NA	NA	NA	NA	NA	NA	NA	NA	NA
O15231	615	ZNF185	ZN185_HUMAN Zinc finger protein 185 OS=Homo sapiens OX=9606 GN=ZNF185 PE=1 SV=3	KPPC(BTD[C])GSTPYSER|KPPC(BTD[C])GSTPYSER	0.28	2.29	0.68	NA	0.34	1.05	0.52	NA	1.02	NA	NA	0.72	NA	0.89	1.24	0.87	0.73	1.02	0.9	NA	0.91	1.76	0.52	0.73	0.63	1.15	0.99	NA	3	0.92	1.82	1.51	1.06	0.87	1.01	0.81	1.04	1.27	0.89	0.76	0.7	0.77	0.88	0.93	0.7
O15231	639	ZNF185	ZN185_HUMAN Zinc finger protein 185 OS=Homo sapiens OX=9606 GN=ZNF185 PE=1 SV=3	EIRDC(BTD[C])PK|	NA	3.45	NA	0.48	NA	0.99	NA	NA	NA	NA	NA	0.79	NA	NA	1.38	0.99	0.77	NA	NA	NA	1.08	2.13	NA	0.83	0.89	0.94	1.07	NA	NA	NA	NA	1.29	1.31	0.8	1.24	0.39	0.73	NA	NA	NA	NA	NA	NA	NA	NA
O15231	532	ZNF185	ZN185_HUMAN Zinc finger protein 185 OS=Homo sapiens OX=9606 GN=ZNF185 PE=1 SV=3	RESC(BTD[C])TSR|	NA	NA	NA	NA	0.3	NA	0.53	0.36	NA	NA	NA	0.65	NA	1.44	2.41	0.79	NA	NA	NA	NA	0.78	NA	NA	NA	1.06	0.86	NA	NA	NA	NA	NA	NA	NA	0.84	1.18	NA	0.79	1.53	NA	NA	NA	0.99	NA	NA	NA
O15231	317	ZNF185	ZN185_HUMAN Zinc finger protein 185 OS=Homo sapiens OX=9606 GN=ZNF185 PE=1 SV=3	DKEAPC(BTD[C])SR|	NA	NA	0.61	NA	0.38	NA	0.47	0.33	NA	NA	NA	0.46	NA	0.72	1.14	0.81	0.62	NA	NA	NA	0.98	NA	0.51	NA	0.71	0.91	0.84	NA	6.98	NA	NA	1.8	1.01	0.72	1.04	1.05	0.97	0.56	0.91	0.73	0.84	NA	NA	NA	0.75
O15231	466	ZNF185	ZN185_HUMAN Zinc finger protein 185 OS=Homo sapiens OX=9606 GN=ZNF185 PE=1 SV=3	RESC(BTD[C])GSSVLTDFEGK|	NA	NA	NA	NA	NA	NA	NA	0.46	NA	NA	NA	NA	NA	NA	NA	NA	NA	NA	NA	NA	NA	NA	NA	NA	NA	NA	NA	NA	NA	NA	NA	1.63	1.3	NA	NA	2.29	0.75	NA	0.73	NA	NA	NA	NA	NA	NA
O15269	133	SPTLC1	SPTC1_HUMAN Serine palmitoyltransferase 1 OS=Homo sapiens OX=9606 GN=SPTLC1 PE=1 SV=1	YGVGTC(BTD[C])GPR|YGVGTC(BTD[C])GPR	NA	2.14	0.91	0.53	NA	1.11	NA	NA	0.96	NA	1.26	0.74	0.89	NA	NA	0.8	NA	1.02	0.85	0.51	0.75	2.24	NA	0.84	0.61	0.84	NA	NA	NA	NA	NA	NA	NA	NA	NA	NA	1.03	0.9	NA	NA	NA	NA	NA	NA	NA
O15269	370	SPTLC1	SPTC1_HUMAN Serine palmitoyltransferase 1 OS=Homo sapiens OX=9606 GN=SPTLC1 PE=1 SV=1	EKC(BTD[C])GQIHK|EKC(BTD[C])GQIHK	NA	NA	0.66	NA	0.34	1.62	NA	NA	0.67	NA	1.27	0.88	NA	NA	NA	0.93	0.55	NA	NA	NA	0.91	1.53	0.45	0.77	NA	0.86	NA	0.97	NA	0.91	0.95	NA	NA	1.02	NA	0.63	0.99	NA	NA	0.51	NA	NA	NA	0.73	0.54
O15269	192	SPTLC1	SPTC1_HUMAN Serine palmitoyltransferase 1 OS=Homo sapiens OX=9606 GN=SPTLC1 PE=1 SV=1	|AAC(BTD[C])FAIQK	NA	1.97	1.08	NA	NA	1.23	NA	NA	1.2	NA	NA	NA	NA	NA	NA	NA	0.67	0.99	NA	NA	1	NA	NA	NA	0.87	0.93	1.64	NA	1.76	NA	NA	NA	NA	NA	NA	NA	NA	NA	NA	NA	NA	NA	NA	NA	NA
O15269	419	SPTLC1	SPTC1_HUMAN Serine palmitoyltransferase 1 OS=Homo sapiens OX=9606 GN=SPTLC1 PE=1 SV=1	LLQEIVDQC(BTD[C])MNR|	NA	NA	NA	NA	NA	NA	NA	NA	NA	NA	NA	NA	NA	NA	NA	NA	NA	NA	NA	NA	NA	NA	NA	NA	NA	NA	NA	NA	NA	NA	NA	NA	NA	NA	NA	NA	NA	NA	NA	NA	0.7	NA	NA	NA	0.7
O15269	438	SPTLC1	SPTC1_HUMAN Serine palmitoyltransferase 1 OS=Homo sapiens OX=9606 GN=SPTLC1 PE=1 SV=1	EEKC(BTD[C])LPPPSIR|	NA	NA	NA	NA	NA	NA	NA	NA	NA	NA	NA	NA	NA	NA	NA	NA	NA	NA	NA	NA	NA	NA	NA	NA	NA	NA	NA	NA	NA	NA	NA	NA	NA	1	NA	NA	NA	NA	NA	NA	NA	NA	NA	NA	NA
O15270	99	SPTLC2	SPTC2_HUMAN Serine palmitoyltransferase 2 OS=Homo sapiens OX=9606 GN=SPTLC2 PE=1 SV=1	IEKC(BTD[C])HHATER|	NA	NA	0.91	NA	NA	1.78	NA	NA	NA	NA	NA	1.11	NA	NA	NA	NA	1.07	NA	NA	NA	1.19	NA	NA	0.88	NA	1.4	NA	0.38	NA	NA	NA	NA	NA	1.15	1.02	NA	NA	NA	NA	0.89	NA	NA	NA	NA	NA
O15270	511	SPTLC2	SPTC2_HUMAN Serine palmitoyltransferase 2 OS=Homo sapiens OX=9606 GN=SPTLC2 PE=1 SV=1	FC(BTD[C])LSAAHTK|	NA	1.71	1.74	NA	NA	1.58	NA	NA	NA	NA	1.49	NA	1.2	NA	NA	NA	NA	1.86	0.88	NA	NA	2.81	NA	1.01	1.15	NA	NA	NA	NA	NA	1.15	NA	NA	1	NA	0.57	NA	NA	NA	0.87	NA	0.98	NA	NA	0.64
O15270	188	SPTLC2	SPTC2_HUMAN Serine palmitoyltransferase 2 OS=Homo sapiens OX=9606 GN=SPTLC2 PE=1 SV=1	NTGSC(BTD[C])QEAAAK|NTGSC(BTD[C])QEAAAK	NA	NA	NA	NA	NA	1.49	NA	NA	0.79	NA	NA	0.85	NA	NA	NA	0.92	0.9	1.09	NA	NA	0.95	NA	NA	1.31	1.01	1.03	NA	NA	NA	NA	NA	NA	NA	NA	NA	NA	NA	NA	NA	NA	NA	NA	NA	NA	NA
O15270	139	SPTLC2	SPTC2_HUMAN Serine palmitoyltransferase 2 OS=Homo sapiens OX=9606 GN=SPTLC2 PE=1 SV=1	DNWNRPIC(BTD[C])SVPGAR|	NA	NA	NA	NA	NA	NA	NA	NA	NA	NA	NA	NA	NA	NA	NA	NA	NA	0.99	NA	NA	NA	NA	NA	0.83	0.94	0.93	NA	NA	NA	NA	NA	NA	NA	NA	NA	NA	NA	NA	NA	NA	NA	NA	NA	NA	NA
O15287	354	FANCG	FANCG_HUMAN Fanconi anemia group G protein OS=Homo sapiens OX=9606 GN=FANCG PE=1 SV=1	C(BTD[C])LQTGR|	NA	NA	NA	NA	NA	NA	NA	NA	NA	NA	NA	NA	NA	NA	NA	NA	NA	NA	NA	NA	NA	NA	NA	NA	NA	NA	NA	NA	NA	NA	NA	NA	NA	NA	NA	NA	NA	NA	NA	NA	NA	NA	NA	NA	NA
O15294	531	OGT	OGT1_HUMAN UDP-N-acetylglucosamine--peptide N-acetylglucosaminyltransferase 110 kDa subunit OS=Homo sapiens OX=9606 GN=OGT PE=1 SV=3	HGNLC(BTD[C])LDK|	NA	NA	NA	NA	NA	NA	NA	NA	NA	NA	NA	NA	NA	NA	NA	NA	NA	NA	NA	NA	NA	NA	NA	0.58	NA	NA	NA	NA	NA	NA	NA	NA	NA	NA	NA	NA	NA	NA	NA	NA	NA	NA	NA	NA	NA
O15294	323	OGT	OGT1_HUMAN UDP-N-acetylglucosamine--peptide N-acetylglucosaminyltransferase 110 kDa subunit OS=Homo sapiens OX=9606 GN=OGT PE=1 SV=3	|LC(BTD[C])PTHADSLNNLANIK	NA	NA	NA	NA	NA	NA	NA	NA	NA	NA	NA	NA	NA	NA	NA	0.99	NA	NA	NA	NA	NA	NA	NA	NA	NA	NA	NA	NA	NA	NA	NA	NA	NA	NA	NA	NA	NA	NA	NA	NA	NA	NA	NA	NA	NA
O15305	136	PMM2	PMM2_HUMAN Phosphomannomutase 2 OS=Homo sapiens OX=9606 GN=PMM2 PE=1 SV=1	SC(BTD[C])SQEER|	NA	NA	NA	NA	NA	NA	NA	NA	NA	NA	NA	1.17	NA	NA	NA	NA	0.91	NA	NA	NA	1.3	NA	NA	NA	1.06	NA	NA	NA	NA	NA	NA	NA	NA	NA	NA	NA	NA	NA	NA	NA	NA	NA	NA	NA	NA
O15321	445	TM9SF1	TM9S1_HUMAN Transmembrane 9 superfamily member 1 OS=Homo sapiens OX=9606 GN=TM9SF1 PE=2 SV=2	NNASPFDAPC(BTD[C])R|NNASPFDAPC(BTD[C])R	NA	1.83	0.95	NA	NA	1.04	0.9	NA	0.86	NA	NA	0.78	1.23	NA	NA	0.9	1.17	1.14	0.78	0.77	1.07	2.03	NA	0.97	0.96	1.07	NA	NA	NA	NA	NA	2.14	1.5	NA	NA	NA	NA	NA	NA	NA	NA	NA	NA	NA	NA
O15344	302	MID1	TRI18_HUMAN E3 ubiquitin-protein ligase Midline-1 OS=Homo sapiens OX=9606 GN=MID1 PE=1 SV=1	|LAQQIANC(BTD[C])K	NA	2.65	NA	NA	NA	NA	NA	NA	0.88	NA	NA	1.54	NA	NA	NA	1.32	0.52	1.09	NA	NA	1.06	NA	NA	NA	0.7	0.91	NA	NA	NA	NA	NA	NA	NA	NA	NA	NA	NA	NA	NA	NA	NA	NA	NA	NA	NA
O15355	13	PPM1G	PPM1G_HUMAN Protein phosphatase 1G OS=Homo sapiens OX=9606 GN=PPM1G PE=1 SV=1	C(BTD[C])SGDGVGAPR|	NA	NA	NA	NA	NA	NA	NA	1.27	NA	0.85	NA	0.99	NA	NA	NA	0.91	NA	NA	NA	NA	0.92	NA	NA	1.01	0.99	NA	NA	NA	NA	NA	NA	NA	NA	NA	NA	NA	NA	0.98	NA	NA	NA	NA	NA	0.96	0.56
O15355	351	PPM1G	PPM1G_HUMAN Protein phosphatase 1G OS=Homo sapiens OX=9606 GN=PPM1G PE=1 SV=1	QLIVANAGDSRC(BTD[C])VVSEAGK|C(BTD[C])VVSEAGK	0.82	NA	NA	NA	0.37	NA	0.73	NA	NA	0.75	NA	NA	NA	NA	NA	1.05	0.43	NA	NA	NA	0.85	NA	0.97	NA	NA	NA	NA	NA	2.35	NA	NA	NA	NA	NA	NA	NA	NA	0.5	NA	NA	NA	0.64	NA	1.23	NA
O15355	164	PPM1G	PPM1G_HUMAN Protein phosphatase 1G OS=Homo sapiens OX=9606 GN=PPM1G PE=1 SV=1	YGQNC(BTD[C])HK|	0.29	2.1	0.99	0.52	0.3	1.35	0.4	0.5	1.12	0.61	0.96	0.9	1.06	NA	1.26	NA	0.8	0.88	0.77	NA	0.82	2.34	NA	NA	0.9	0.98	1.4	4.03	1.83	1.46	NA	2.11	NA	0.9	1	0.87	0.82	0.51	NA	0.6	0.7	0.63	NA	0.84	0.65
O15355	241	PPM1G	PPM1G_HUMAN Protein phosphatase 1G OS=Homo sapiens OX=9606 GN=PPM1G PE=1 SV=1	GTEAGQVGEPGIPTGEAGPSC(BTD[C])SSASDK|GTEAGQVGEPGIPTGEAGPSC(BTD[C])SSASDK	0.52	NA	NA	NA	0.46	NA	0.69	0.48	NA	NA	NA	0.84	NA	NA	0.97	0.96	NA	NA	NA	NA	NA	NA	0.51	NA	NA	NA	NA	NA	NA	NA	NA	2.11	NA	0.8	NA	NA	NA	NA	NA	NA	NA	0.82	NA	1.02	NA
O15357	1121	INPPL1	SHIP2_HUMAN Phosphatidylinositol 3,4,5-trisphosphate 5-phosphatase 2 OS=Homo sapiens OX=9606 GN=INPPL1 PE=1 SV=2	|SC(BTD[C])SVLQMAK	NA	NA	NA	NA	NA	NA	NA	NA	NA	NA	NA	NA	NA	NA	NA	NA	NA	NA	NA	NA	NA	NA	NA	NA	NA	NA	NA	NA	NA	NA	NA	NA	NA	NA	NA	NA	NA	NA	NA	NA	NA	NA	NA	NA	NA
O15357	926	INPPL1	SHIP2_HUMAN Phosphatidylinositol 3,4,5-trisphosphate 5-phosphatase 2 OS=Homo sapiens OX=9606 GN=INPPL1 PE=1 SV=2	KPAFTEASC(BTD[C])PLSR|KPAFTEASC(BTD[C])PLSR	NA	NA	1.33	NA	0.94	NA	NA	NA	1.38	NA	NA	0.83	NA	0.9	1.67	1.2	NA	NA	NA	NA	0.96	NA	0.95	1.01	1.2	NA	NA	NA	2.51	0.98	1.5	NA	1.24	0.73	1.01	0.86	1.1	NA	0.79	0.93	NA	NA	NA	1.17	NA
O15360	1142	FANCA	FANCA_HUMAN Fanconi anemia group A protein OS=Homo sapiens OX=9606 GN=FANCA PE=1 SV=2	|GLLNAC(BTD[C])LR	NA	NA	NA	NA	NA	NA	NA	NA	NA	NA	NA	NA	NA	NA	NA	NA	NA	NA	NA	NA	NA	NA	NA	NA	NA	NA	NA	NA	NA	NA	NA	NA	NA	NA	NA	NA	NA	NA	NA	NA	NA	NA	NA	NA	NA
O15371	404	EIF3D	EIF3D_HUMAN Eukaryotic translation initiation factor 3 subunit D OS=Homo sapiens OX=9606 GN=EIF3D PE=1 SV=1	HC(BTD[C])NGVDWR|	NA	NA	NA	NA	NA	NA	1.03	NA	NA	NA	NA	NA	NA	NA	NA	NA	NA	NA	NA	NA	NA	NA	NA	NA	NA	NA	NA	NA	NA	NA	NA	NA	NA	NA	NA	NA	NA	NA	NA	NA	NA	NA	NA	NA	NA
O15371	498	EIF3D	EIF3D_HUMAN Eukaryotic translation initiation factor 3 subunit D OS=Homo sapiens OX=9606 GN=EIF3D PE=1 SV=1	CVIDIC(BTD[C])MK|CVIDIC(BTD[C])MK	NA	NA	NA	NA	NA	NA	NA	NA	NA	NA	NA	NA	NA	NA	NA	NA	NA	NA	NA	NA	NA	NA	NA	NA	NA	NA	NA	NA	NA	NA	NA	NA	NA	NA	NA	NA	NA	NA	NA	NA	NA	NA	NA	NA	NA
O15379	279	HDAC3	HDAC3_HUMAN Histone deacetylase 3 OS=Homo sapiens OX=9606 GN=HDAC3 PE=1 SV=2	GHGEC(BTD[C])VEYVK|	NA	NA	1.09	NA	NA	1.74	NA	NA	0.92	NA	NA	NA	NA	NA	NA	NA	NA	NA	NA	NA	NA	1.47	NA	NA	NA	NA	NA	NA	NA	NA	NA	NA	NA	NA	NA	NA	NA	NA	NA	NA	NA	NA	NA	NA	NA
O15381	309	NVL	NVL_HUMAN Nuclear valosin-containing protein-like OS=Homo sapiens OX=9606 GN=NVL PE=1 SV=1	GVLLHGPPGC(BTD[C])GK|	NA	1.53	NA	NA	NA	NA	NA	NA	NA	NA	NA	NA	NA	NA	NA	NA	NA	NA	NA	NA	0.91	NA	NA	NA	0.77	NA	NA	NA	NA	NA	NA	NA	NA	NA	NA	NA	NA	NA	NA	NA	NA	NA	NA	NA	NA
O15382	342	BCAT2	BCAT2_HUMAN Branched-chain-amino-acid aminotransferase, mitochondrial OS=Homo sapiens OX=9606 GN=BCAT2 PE=1 SV=2	|EVFGSGTAC(BTD[C])QVCPVHR	NA	2.31	1.01	0.55	NA	1	NA	NA	1.1	NA	0.76	0.92	1.04	NA	NA	NA	NA	0.84	1.02	0.57	0.59	1.65	NA	0.83	0.78	0.78	NA	NA	NA	NA	NA	1.92	1.58	1.24	NA	NA	0.86	NA	NA	0.43	0.33	0.57	NA	0.62	NA
O15382	135	BCAT2	BCAT2_HUMAN Branched-chain-amino-acid aminotransferase, mitochondrial OS=Homo sapiens OX=9606 GN=BCAT2 PE=1 SV=2	LC(BTD[C])LPSFDK|LC(BTD[C])LPSFDK	NA	1.23	NA	0.37	NA	NA	NA	NA	NA	NA	NA	NA	1.23	NA	NA	NA	NA	NA	NA	NA	NA	NA	NA	1.03	NA	NA	NA	NA	NA	NA	NA	NA	NA	NA	NA	NA	NA	NA	NA	NA	NA	NA	NA	NA	NA
O15382	345	BCAT2	BCAT2_HUMAN Branched-chain-amino-acid aminotransferase, mitochondrial OS=Homo sapiens OX=9606 GN=BCAT2 PE=1 SV=2	EVFGSGTACQVC(BTD[C])PVHR|	NA	NA	NA	NA	NA	NA	NA	NA	NA	NA	NA	NA	NA	NA	NA	NA	NA	NA	NA	NA	NA	NA	NA	NA	NA	NA	NA	NA	NA	NA	NA	NA	NA	NA	NA	NA	NA	NA	NA	NA	NA	NA	NA	NA	NA
O15382	147	BCAT2	BCAT2_HUMAN Branched-chain-amino-acid aminotransferase, mitochondrial OS=Homo sapiens OX=9606 GN=BCAT2 PE=1 SV=2	LELLEC(BTD[C])IR|	NA	NA	NA	NA	NA	NA	NA	NA	NA	NA	NA	NA	NA	NA	NA	NA	NA	NA	NA	NA	NA	NA	NA	NA	NA	NA	NA	NA	NA	NA	NA	NA	NA	NA	NA	NA	NA	NA	NA	NA	0.46	NA	0.45	NA	0.65
O15391	288	YY2	TYY2_HUMAN Transcription factor YY2 OS=Homo sapiens OX=9606 GN=YY2 PE=2 SV=1	VHVCAEC(BTD[C])GK|	NA	NA	NA	NA	NA	NA	NA	NA	NA	NA	NA	NA	NA	NA	NA	NA	NA	NA	NA	NA	NA	NA	NA	NA	NA	NA	NA	NA	NA	NA	NA	NA	NA	NA	NA	NA	NA	NA	NA	NA	NA	NA	NA	NA	NA
O15391	285	YY2	TYY2_HUMAN Transcription factor YY2 OS=Homo sapiens OX=9606 GN=YY2 PE=2 SV=1	|VHVC(BTD[C])AECGK	NA	NA	NA	NA	NA	NA	NA	NA	NA	NA	NA	NA	NA	NA	NA	NA	NA	NA	NA	NA	NA	NA	NA	NA	NA	NA	NA	NA	0.28	NA	NA	NA	NA	NA	NA	NA	NA	NA	NA	NA	NA	NA	NA	NA	NA
O15392	84	BIRC5	BIRC5_HUMAN Baculoviral IAP repeat-containing protein 5 OS=Homo sapiens OX=9606 GN=BIRC5 PE=1 SV=3	HSSGC(BTD[C])AFLSVK|	NA	NA	NA	NA	NA	NA	NA	NA	0.91	NA	NA	NA	NA	NA	NA	NA	NA	NA	NA	NA	NA	NA	NA	NA	NA	NA	NA	NA	NA	NA	NA	NA	NA	NA	1.29	NA	NA	NA	NA	NA	NA	NA	NA	NA	NA
O15400	28	STX7	STX7_HUMAN Syntaxin-7 OS=Homo sapiens OX=9606 GN=STX7 PE=1 SV=4	ITQC(BTD[C])SVEIQR|	NA	5.7	1.03	0.38	NA	1.21	NA	NA	NA	NA	0.83	1.33	0.71	NA	NA	0.8	0.51	0.89	0.76	0.35	0.88	3.41	NA	0.73	0.86	0.88	3.82	0.32	NA	NA	NA	NA	NA	NA	NA	NA	0.66	NA	NA	NA	NA	NA	0.32	NA	0.31
O15438	1071	ABCC3	MRP3_HUMAN Canalicular multispecific organic anion transporter 2 OS=Homo sapiens OX=9606 GN=ABCC3 PE=1 SV=3	|ILNC(BTD[C])FSK	NA	NA	NA	0.34	NA	NA	NA	NA	NA	NA	4.49	NA	NA	NA	NA	NA	NA	NA	NA	NA	NA	NA	NA	NA	NA	NA	NA	NA	NA	0.67	NA	NA	NA	NA	NA	NA	NA	0.84	NA	NA	0.79	NA	NA	1.06	NA
O15438	1435	ABCC3	MRP3_HUMAN Canalicular multispecific organic anion transporter 2 OS=Homo sapiens OX=9606 GN=ABCC3 PE=1 SV=3	QLVC(BTD[C])LAR|	NA	NA	NA	NA	NA	NA	NA	NA	NA	NA	NA	NA	NA	NA	NA	NA	NA	NA	NA	NA	NA	NA	NA	NA	NA	NA	NA	NA	NA	NA	NA	NA	NA	NA	NA	NA	NA	NA	NA	NA	NA	NA	NA	NA	NA
O15440	46	ABCC5	MRP5_HUMAN Multidrug resistance-associated protein 5 OS=Homo sapiens OX=9606 GN=ABCC5 PE=1 SV=2	TRPLEC(BTD[C])QDALETAAR|	NA	NA	NA	NA	NA	NA	NA	NA	NA	NA	NA	NA	NA	NA	NA	NA	NA	NA	NA	NA	1.74	NA	NA	NA	NA	NA	NA	0.09	NA	NA	NA	1.08	NA	NA	NA	NA	NA	NA	NA	NA	NA	NA	NA	NA	NA
O15446	14	CD3EAP	RPA34_HUMAN DNA-directed RNA polymerase I subunit RPA34 OS=Homo sapiens OX=9606 GN=CD3EAP PE=1 SV=1	|FSC(BTD[C])PPNFTAKPPASESPR	NA	NA	NA	NA	NA	NA	NA	NA	NA	NA	NA	NA	NA	NA	1.02	NA	NA	NA	NA	NA	NA	NA	NA	NA	NA	NA	NA	NA	NA	NA	NA	NA	NA	1.02	0.96	NA	1.81	0.77	NA	NA	NA	NA	NA	NA	NA
O15446	150	CD3EAP	RPA34_HUMAN DNA-directed RNA polymerase I subunit RPA34 OS=Homo sapiens OX=9606 GN=CD3EAP PE=1 SV=1	FC(BTD[C])AFGGNPPVTGPR|	NA	NA	NA	NA	NA	NA	NA	NA	NA	NA	NA	NA	NA	NA	NA	NA	NA	NA	NA	NA	1.06	NA	NA	1.22	NA	NA	NA	NA	NA	NA	NA	NA	NA	NA	NA	NA	NA	NA	NA	NA	NA	NA	NA	NA	NA
O15460	504	P4HA2	P4HA2_HUMAN Prolyl 4-hydroxylase subunit alpha-2 OS=Homo sapiens OX=9606 GN=P4HA2 PE=1 SV=1	HAAC(BTD[C])PVLVGCK|	NA	NA	NA	NA	NA	NA	NA	NA	NA	NA	NA	NA	NA	NA	4.38	NA	NA	NA	NA	NA	NA	NA	NA	NA	NA	NA	NA	NA	NA	NA	NA	NA	NA	NA	NA	NA	NA	NA	NA	NA	NA	NA	NA	NA	NA
O15460	510	P4HA2	P4HA2_HUMAN Prolyl 4-hydroxylase subunit alpha-2 OS=Homo sapiens OX=9606 GN=P4HA2 PE=1 SV=1	HAACPVLVGC(BTD[C])K|	NA	NA	NA	NA	0.8	NA	NA	NA	NA	NA	NA	NA	NA	NA	NA	NA	NA	NA	NA	NA	NA	NA	NA	NA	NA	NA	NA	NA	NA	NA	NA	NA	NA	0.67	1.18	NA	1.38	NA	NA	NA	NA	NA	NA	1.42	NA
O15484	246	CAPN5	CAN5_HUMAN Calpain-5 OS=Homo sapiens OX=9606 GN=CAPN5 PE=1 SV=2	LAC(BTD[C])GLVK|	NA	NA	NA	NA	NA	NA	NA	NA	NA	NA	NA	NA	NA	NA	NA	NA	NA	NA	NA	NA	NA	NA	NA	NA	NA	0.83	NA	NA	NA	NA	NA	NA	NA	NA	NA	NA	NA	NA	NA	NA	NA	NA	NA	NA	NA
O15498	66	YKT6	YKT6_HUMAN Synaptobrevin homolog YKT6 OS=Homo sapiens OX=9606 GN=YKT6 PE=1 SV=1	EQDYLC(BTD[C])HVYVR|	NA	NA	NA	NA	NA	NA	NA	NA	NA	NA	NA	NA	NA	NA	NA	NA	NA	NA	NA	NA	NA	NA	NA	NA	NA	NA	NA	NA	NA	NA	0.4	NA	NA	NA	NA	0.64	NA	NA	NA	NA	NA	NA	NA	NA	NA
O15523	221	DDX3Y	DDX3Y_HUMAN ATP-dependent RNA helicase DDX3Y OS=Homo sapiens OX=9606 GN=DDX3Y PE=1 SV=2	RDLMAC(BTD[C])AQTGSGK|DLMAC(BTD[C])AQTGSGK	0.42	NA	1.11	NA	NA	1.35	NA	NA	NA	0.84	NA	0.97	0.83	NA	NA	0.99	0.81	NA	NA	NA	1.03	2.27	0.76	NA	NA	0.89	1.14	NA	1.58	NA	NA	NA	NA	NA	NA	NA	NA	NA	NA	NA	NA	NA	NA	NA	NA
O15523	296	DDX3Y	DDX3Y_HUMAN ATP-dependent RNA helicase DDX3Y OS=Homo sapiens OX=9606 GN=DDX3Y PE=1 SV=2	VRPC(BTD[C])VVYGGADIGQQIR|	NA	NA	0.83	0.49	0.43	1.33	0.58	0.4	NA	0.48	0.67	0.88	0.66	NA	NA	0.95	0.68	NA	0.77	NA	0.82	2.4	0.77	NA	NA	0.91	NA	5.13	2.47	0.9	NA	NA	NA	NA	NA	NA	NA	NA	NA	0.82	0.62	0.55	1.13	0.92	0.8
O15523	339	DDX3Y	DDX3Y_HUMAN ATP-dependent RNA helicase DDX3Y OS=Homo sapiens OX=9606 GN=DDX3Y PE=1 SV=2	|IGLDFC(BTD[C])K	0.85	1.74	1	NA	0.5	0.99	0.8	1.11	1.04	NA	NA	1.14	NA	NA	NA	1.17	1.23	NA	NA	NA	1.15	NA	0.91	NA	NA	NA	NA	NA	NA	NA	NA	NA	NA	NA	NA	NA	NA	NA	NA	NA	NA	NA	NA	NA	NA
O15523	315	DDX3Y	DDX3Y_HUMAN ATP-dependent RNA helicase DDX3Y OS=Homo sapiens OX=9606 GN=DDX3Y PE=1 SV=2	|GC(BTD[C])HLLVATPGR	NA	1.67	1.03	0.53	0.53	1.48	NA	0.54	1.13	NA	0.89	1.25	0.82	NA	1.06	1.01	0.66	NA	0.83	0.59	1.02	1.81	0.61	NA	NA	1.05	2.36	NA	NA	0.9	NA	NA	NA	NA	NA	0.4	NA	0.48	NA	0.51	0.51	0.65	NA	0.64	0.51
O15525	68	MAFG	MAFG_HUMAN Transcription factor MafG OS=Homo sapiens OX=9606 GN=MAFG PE=1 SV=1	GYAASC(BTD[C])R|GYAASC(BTD[C])R	NA	NA	NA	NA	NA	NA	NA	NA	NA	NA	NA	0.99	NA	NA	NA	1	0.84	NA	NA	NA	0.98	3.16	NA	0.97	0.87	1.05	NA	NA	NA	NA	NA	NA	NA	NA	NA	NA	NA	NA	NA	NA	NA	NA	NA	NA	NA
O15533	91	TAPBP	TPSN_HUMAN Tapasin OS=Homo sapiens OX=9606 GN=TAPBP PE=1 SV=1	GAPAPHC(BTD[C])EMSR|GAPAPHC(BTD[C])EMSR	0.55	NA	NA	NA	0.48	NA	0.9	0.63	NA	0.54	NA	NA	NA	NA	NA	NA	1.09	NA	NA	NA	1.05	1.86	0.76	1.14	NA	NA	NA	NA	NA	NA	NA	NA	NA	0.98	NA	NA	0.98	NA	NA	0.69	NA	NA	NA	NA	0.57
O15533	115	TAPBP	TPSN_HUMAN Tapasin OS=Homo sapiens OX=9606 GN=TAPBP PE=1 SV=1	WASGLTPAQNC(BTD[C])PR|WASGLTPAQNC(BTD[C])PR	NA	NA	NA	NA	NA	1.02	NA	NA	1.24	NA	NA	0.91	NA	NA	NA	NA	0.72	NA	NA	NA	0.84	NA	0.83	1.01	0.87	0.98	NA	NA	NA	NA	NA	NA	NA	0.9	0.92	NA	1.14	NA	NA	1.12	NA	NA	NA	0.87	NA
O15547	402	P2RX6	P2RX6_HUMAN P2X purinoceptor 6 OS=Homo sapiens OX=9606 GN=P2RX6 PE=1 SV=2	LAEC(BTD[C])IR|	NA	NA	0.69	0.5	NA	NA	NA	NA	NA	NA	NA	NA	NA	NA	NA	NA	NA	1.01	NA	NA	NA	NA	NA	NA	NA	NA	1.17	NA	NA	NA	NA	NA	NA	NA	NA	NA	NA	NA	NA	NA	NA	NA	NA	NA	NA
O43143	226	DHX15	DHX15_HUMAN Pre-mRNA-splicing factor ATP-dependent RNA helicase DHX15 OS=Homo sapiens OX=9606 GN=DHX15 PE=1 SV=2	FEDC(BTD[C])SSAK|FEDC(BTD[C])SSAK	NA	3.49	1.96	NA	NA	2.23	0.71	NA	0.96	0.73	NA	1.44	NA	NA	1.04	1.44	0.82	1.62	NA	NA	1.34	NA	0.69	1.13	1.04	0.99	NA	NA	NA	NA	NA	NA	NA	NA	NA	NA	NA	0.47	NA	0.55	0.41	0.59	0.63	0.83	0.6
O43143	190	DHX15	DHX15_HUMAN Pre-mRNA-splicing factor ATP-dependent RNA helicase DHX15 OS=Homo sapiens OX=9606 GN=DHX15 PE=1 SV=2	|GVAC(BTD[C])TQPR	0.29	3.98	0.63	0.59	0.3	1.31	0.38	0.37	0.88	0.47	0.48	0.69	0.67	NA	NA	1.06	0.44	0.73	0.52	0.42	0.73	3.03	NA	0.56	0.58	0.85	1.56	NA	4.83	NA	NA	NA	NA	NA	NA	NA	NA	NA	NA	0.47	0.45	0.97	0.62	1.31	0.83
O43143	750	DHX15	DHX15_HUMAN Pre-mRNA-splicing factor ATP-dependent RNA helicase DHX15 OS=Homo sapiens OX=9606 GN=DHX15 PE=1 SV=2	TC(BTD[C])TDIKPEWLVK|	NA	NA	NA	0.34	NA	NA	NA	NA	NA	NA	NA	1.38	NA	NA	0.94	1.49	0.71	NA	NA	NA	1.15	NA	1.08	1.05	0.99	0.97	NA	0.59	NA	0.54	0.3	NA	NA	1.08	1.13	0.24	0.71	0.48	NA	NA	0.48	1.15	NA	0.98	0.57
O43143	174	DHX15	DHX15_HUMAN Pre-mRNA-splicing factor ATP-dependent RNA helicase DHX15 OS=Homo sapiens OX=9606 GN=DHX15 PE=1 SV=2	TTQIPQWC(BTD[C])VEYMR|	NA	NA	NA	NA	NA	NA	NA	NA	NA	NA	NA	NA	NA	NA	NA	NA	1.06	NA	NA	NA	NA	NA	NA	NA	NA	NA	NA	NA	NA	NA	NA	NA	NA	NA	NA	NA	NA	NA	NA	NA	NA	NA	NA	NA	NA
O43148	73	RNMT	MCES_HUMAN mRNA cap guanine-N7 methyltransferase OS=Homo sapiens OX=9606 GN=RNMT PE=1 SV=1	|ESSSC(BTD[C])GKDTPSK	NA	1.62	0.67	NA	0.25	NA	NA	NA	NA	NA	NA	0.75	NA	NA	NA	0.94	0.62	NA	0.94	1.35	1.08	NA	NA	0.54	0.85	0.93	NA	2.82	NA	NA	NA	NA	NA	1.03	NA	NA	NA	1.11	NA	NA	NA	0.66	NA	0.99	NA
O43148	95	RNMT	MCES_HUMAN mRNA cap guanine-N7 methyltransferase OS=Homo sapiens OX=9606 GN=RNMT PE=1 SV=1	KLDPEIVPEEKDC(BTD[C])GDAEGNSK|	NA	NA	NA	NA	NA	NA	NA	1.28	NA	NA	NA	NA	NA	NA	NA	NA	NA	NA	NA	NA	NA	NA	NA	NA	NA	NA	NA	2.51	NA	NA	NA	NA	NA	NA	NA	NA	NA	0.91	NA	1.24	0.63	NA	NA	NA	0.64
O43148	225	RNMT	MCES_HUMAN mRNA cap guanine-N7 methyltransferase OS=Homo sapiens OX=9606 GN=RNMT PE=1 SV=1	LVC(BTD[C])TDIADVSVK|	NA	NA	NA	NA	0.97	NA	NA	NA	NA	NA	NA	NA	NA	NA	NA	NA	NA	NA	NA	NA	NA	NA	NA	NA	NA	NA	NA	NA	NA	NA	NA	NA	NA	NA	NA	NA	NA	NA	NA	NA	NA	NA	NA	NA	NA
O43148	356	RNMT	MCES_HUMAN mRNA cap guanine-N7 methyltransferase OS=Homo sapiens OX=9606 GN=RNMT PE=1 SV=1	KGDYPLFGC(BTD[C])K|	NA	1.27	1.01	NA	NA	NA	NA	NA	NA	NA	NA	NA	NA	NA	NA	NA	NA	NA	NA	NA	NA	1.01	NA	1.04	NA	NA	NA	NA	NA	NA	NA	NA	NA	NA	NA	NA	NA	NA	NA	NA	NA	NA	NA	NA	NA
O43149	1069	ZZEF1	ZZEF1_HUMAN Zinc finger ZZ-type and EF-hand domain-containing protein 1 OS=Homo sapiens OX=9606 GN=ZZEF1 PE=1 SV=6	|KLC(BTD[C])SGPEGGLR	NA	NA	NA	NA	NA	NA	NA	NA	NA	NA	NA	NA	NA	NA	NA	NA	NA	NA	NA	NA	0.9	NA	NA	NA	NA	NA	NA	NA	NA	NA	NA	NA	NA	NA	NA	NA	NA	NA	NA	NA	NA	NA	NA	NA	NA
O43172	299	PRPF4	PRP4_HUMAN U4/U6 small nuclear ribonucleoprotein Prp4 OS=Homo sapiens OX=9606 GN=PRPF4 PE=1 SV=2	|DVNLASC(BTD[C])AADGSVK	NA	NA	NA	NA	NA	NA	NA	NA	NA	NA	NA	1.13	NA	NA	NA	NA	NA	NA	NA	NA	NA	NA	NA	NA	NA	NA	NA	NA	NA	NA	NA	NA	NA	NA	NA	NA	NA	NA	NA	NA	NA	NA	NA	NA	NA
O43172	399	PRPF4	PRP4_HUMAN U4/U6 small nuclear ribonucleoprotein Prp4 OS=Homo sapiens OX=9606 GN=PRPF4 PE=1 SV=2	C(BTD[C])IMFLEGHLK|	NA	NA	NA	NA	NA	NA	NA	NA	NA	NA	NA	NA	NA	NA	NA	NA	NA	NA	NA	NA	NA	NA	NA	NA	NA	NA	NA	NA	NA	NA	NA	NA	NA	NA	NA	NA	NA	NA	NA	NA	NA	NA	NA	NA	NA
O43175	234	PHGDH	SERA_HUMAN D-3-phosphoglycerate dehydrogenase OS=Homo sapiens OX=9606 GN=PHGDH PE=1 SV=4	VVNC(BTD[C])AR|	0.31	NA	0.98	0.45	NA	1.09	0.47	NA	0.71	NA	NA	0.62	NA	NA	NA	0.89	0.52	NA	0.68	NA	0.15	NA	NA	0.47	0.55	0.78	NA	NA	NA	NA	NA	NA	NA	NA	NA	NA	NA	NA	NA	NA	NA	NA	NA	NA	NA
O43175	281	PHGDH	SERA_HUMAN D-3-phosphoglycerate dehydrogenase OS=Homo sapiens OX=9606 GN=PHGDH PE=1 SV=4	|ALVDHENVISC(BTD[C])PHLGASTK	NA	NA	NA	NA	NA	NA	NA	NA	NA	NA	NA	NA	NA	NA	NA	NA	NA	NA	NA	NA	NA	NA	NA	1.2	NA	NA	NA	NA	NA	NA	NA	NA	NA	1.09	NA	NA	NA	NA	NA	NA	NA	NA	NA	NA	NA
O43242	210	PSMD3	PSMD3_HUMAN 26S proteasome non-ATPase regulatory subunit 3 OS=Homo sapiens OX=9606 GN=PSMD3 PE=1 SV=2	C(BTD[C])YYYHAR|	NA	NA	NA	NA	0.66	NA	NA	NA	NA	NA	NA	NA	NA	NA	NA	NA	NA	NA	NA	NA	NA	NA	NA	NA	NA	NA	NA	NA	NA	NA	NA	NA	NA	NA	NA	NA	NA	NA	NA	NA	NA	NA	NA	NA	NA
O43242	483	PSMD3	PSMD3_HUMAN 26S proteasome non-ATPase regulatory subunit 3 OS=Homo sapiens OX=9606 GN=PSMD3 PE=1 SV=2	ISFC(BTD[C])LDIHNMSVK|	NA	1.74	1.61	NA	NA	NA	NA	NA	NA	NA	NA	NA	NA	NA	NA	1.28	1.04	NA	NA	NA	NA	NA	NA	1.04	1.11	1.29	NA	NA	NA	NA	NA	NA	NA	NA	NA	NA	NA	NA	NA	NA	NA	NA	NA	NA	NA
O43252	360	PAPSS1	PAPS1_HUMAN Bifunctional 3'-phosphoadenosine 5'-phosphosulfate synthase 1 OS=Homo sapiens OX=9606 GN=PAPSS1 PE=1 SV=2	QWGTTC(BTD[C])K|	NA	NA	NA	NA	NA	NA	NA	NA	NA	NA	NA	NA	NA	NA	NA	NA	NA	NA	NA	NA	1.5	NA	NA	NA	NA	NA	NA	NA	NA	NA	NA	NA	NA	NA	NA	NA	NA	NA	NA	NA	NA	NA	NA	NA	NA
O43264	404	ZW10	ZW10_HUMAN Centromere/kinetochore protein zw10 homolog OS=Homo sapiens OX=9606 GN=ZW10 PE=1 SV=3	KC(BTD[C])QDVIVAAR|KC(BTD[C])QDVIVAAR	0.51	2.04	0.72	0.47	0.58	1.28	0.75	0.62	0.97	0.54	1.02	0.89	0.97	1.44	1.2	0.91	0.85	0.94	0.76	NA	0.81	1.94	NA	0.84	0.72	0.98	1.38	3.18	2.25	0.99	0.93	NA	NA	0.67	0.88	0.62	0.97	0.73	0.86	0.56	NA	1.39	1.08	0.85	0.72
O43264	144	ZW10	ZW10_HUMAN Centromere/kinetochore protein zw10 homolog OS=Homo sapiens OX=9606 GN=ZW10 PE=1 SV=3	LEEAQKC(BTD[C])LK|LEEAQKC(BTD[C])LK	NA	3	0.76	0.62	0.4	1.57	0.47	0.42	0.69	NA	1	0.75	NA	0.82	1.21	0.94	0.53	0.9	0.61	0.48	0.89	2.4	0.5	0.62	0.67	1.04	1.58	NA	NA	0.29	0.33	1.94	1.07	0.78	0.94	0.13	0.88	0.79	0.94	0.53	0.46	0.51	0.79	0.87	NA
O43264	39	ZW10	ZW10_HUMAN Centromere/kinetochore protein zw10 homolog OS=Homo sapiens OX=9606 GN=ZW10 PE=1 SV=3	GEVC(BTD[C])NMISK|GEVC(BTD[C])NMISK	NA	NA	NA	NA	NA	NA	NA	NA	NA	NA	NA	NA	NA	NA	NA	NA	0.62	NA	NA	NA	NA	NA	NA	NA	0.89	0.98	NA	NA	NA	NA	NA	NA	NA	NA	NA	NA	NA	NA	NA	NA	NA	NA	NA	NA	NA
O43264	686	ZW10	ZW10_HUMAN Centromere/kinetochore protein zw10 homolog OS=Homo sapiens OX=9606 GN=ZW10 PE=1 SV=3	|LYSLC(BTD[C])K	NA	NA	1.01	NA	NA	NA	NA	NA	NA	NA	NA	NA	NA	NA	NA	1.44	NA	NA	NA	NA	NA	NA	NA	1.15	NA	NA	NA	NA	NA	NA	NA	NA	NA	NA	NA	NA	NA	NA	NA	NA	NA	NA	NA	NA	NA
O43290	674	SART1	SNUT1_HUMAN U4/U6.U5 tri-snRNP-associated protein 1 OS=Homo sapiens OX=9606 GN=SART1 PE=1 SV=1	SLPSAVYC(BTD[C])IEDK|	NA	NA	NA	NA	NA	NA	NA	NA	NA	NA	NA	NA	NA	NA	NA	1.69	NA	NA	NA	NA	0.98	NA	NA	1.06	NA	NA	NA	NA	NA	NA	NA	NA	NA	NA	NA	NA	NA	0.86	NA	NA	1.09	NA	NA	NA	NA
O43291	38	SPINT2	SPIT2_HUMAN Kunitz-type protease inhibitor 2 OS=Homo sapiens OX=9606 GN=SPINT2 PE=1 SV=2	SIHDFC(BTD[C])LVSK|	NA	1.61	0.96	NA	NA	NA	NA	1.14	NA	NA	NA	1.12	NA	NA	NA	1	1.07	NA	NA	NA	0.94	1.26	NA	NA	1.08	NA	NA	NA	NA	NA	NA	NA	NA	NA	NA	NA	NA	NA	NA	NA	NA	NA	NA	NA	NA
O43291	179	SPINT2	SPIT2_HUMAN Kunitz-type protease inhibitor 2 OS=Homo sapiens OX=9606 GN=SPINT2 PE=1 SV=2	|SEEAC(BTD[C])MLR	NA	NA	NA	NA	NA	NA	NA	NA	NA	NA	NA	NA	NA	NA	NA	NA	NA	NA	NA	NA	1.1	NA	NA	NA	0.92	NA	NA	NA	NA	NA	NA	NA	1.77	NA	NA	NA	NA	NA	NA	NA	0.61	NA	0.93	0.94	0.42
O43292	266	GPAA1	GPAA1_HUMAN Glycosylphosphatidylinositol anchor attachment 1 protein OS=Homo sapiens OX=9606 GN=GPAA1 PE=1 SV=3	|GGLLC(BTD[C])TLQGK	NA	NA	NA	0.79	NA	NA	NA	NA	NA	NA	NA	NA	1.13	NA	NA	1.3	1.03	NA	NA	NA	1.54	NA	NA	NA	NA	0.9	NA	NA	NA	NA	NA	NA	NA	NA	NA	NA	NA	NA	NA	NA	NA	NA	NA	NA	NA
O43299	505	AP5Z1	AP5Z1_HUMAN AP-5 complex subunit zeta-1 OS=Homo sapiens OX=9606 GN=AP5Z1 PE=1 SV=2	APSC(BTD[C])LEAFR|	NA	NA	NA	NA	NA	NA	NA	NA	NA	NA	NA	NA	NA	NA	NA	NA	NA	NA	NA	NA	NA	NA	NA	NA	NA	NA	NA	NA	NA	NA	NA	NA	NA	NA	NA	NA	NA	NA	NA	NA	NA	NA	NA	NA	NA
O43318	51	MAP3K7	M3K7_HUMAN Mitogen-activated protein kinase kinase kinase 7 OS=Homo sapiens OX=9606 GN=MAP3K7 PE=1 SV=1	|GAFGVVC(BTD[C])K	NA	NA	NA	NA	NA	NA	NA	NA	NA	NA	NA	NA	NA	NA	NA	NA	NA	NA	NA	NA	NA	NA	NA	NA	1.05	NA	NA	NA	NA	NA	NA	NA	NA	NA	NA	NA	NA	NA	NA	NA	NA	NA	NA	NA	NA
O43390	226	HNRNPR	HNRPR_HUMAN Heterogeneous nuclear ribonucleoprotein R OS=Homo sapiens OX=9606 GN=HNRNPR PE=1 SV=1	LC(BTD[C])DSYEIRPGK|LC(BTD[C])DSYEIRPGK	0.79	2.19	1.03	0.44	0.82	1.34	1.08	1.06	1.17	1.14	1.02	1.12	NA	0.94	NA	0.9	0.59	1.05	0.7	NA	0.94	1.61	1.1	0.98	0.81	1.05	NA	NA	2.63	1.28	NA	NA	NA	0.99	1.18	NA	1.03	0.68	1.04	0.9	0.71	1.2	0.85	1.11	0.85
O43390	99	HNRNPR	HNRPR_HUMAN Heterogeneous nuclear ribonucleoprotein R OS=Homo sapiens OX=9606 GN=HNRNPR PE=1 SV=1	SAFLC(BTD[C])GVMK|	0.56	NA	NA	0.44	NA	NA	0.88	0.62	NA	NA	NA	NA	NA	NA	NA	NA	NA	NA	NA	NA	NA	1.72	NA	NA	NA	NA	NA	NA	NA	0.67	NA	NA	NA	NA	NA	0.49	NA	NA	NA	NA	NA	NA	NA	NA	NA
O43390	292	HNRNPR	HNRPR_HUMAN Heterogeneous nuclear ribonucleoprotein R OS=Homo sapiens OX=9606 GN=HNRNPR PE=1 SV=1	GFC(BTD[C])FLEYEDHK|	NA	NA	NA	NA	NA	NA	1.03	NA	NA	NA	NA	NA	NA	NA	NA	NA	NA	NA	NA	NA	NA	NA	NA	NA	NA	NA	NA	NA	NA	NA	NA	NA	NA	NA	NA	NA	NA	NA	NA	0.59	NA	NA	NA	NA	0.56
O43390	240	HNRNPR	HNRPR_HUMAN Heterogeneous nuclear ribonucleoprotein R OS=Homo sapiens OX=9606 GN=HNRNPR PE=1 SV=1	HIGVC(BTD[C])ISVANNR|	NA	NA	NA	NA	NA	NA	NA	NA	NA	NA	NA	NA	NA	NA	NA	NA	NA	NA	NA	NA	NA	NA	NA	NA	NA	NA	NA	NA	NA	NA	NA	NA	NA	NA	NA	NA	NA	NA	NA	NA	NA	NA	NA	0.7	NA
O43395	651	PRPF3	PRPF3_HUMAN U4/U6 small nuclear ribonucleoprotein Prp3 OS=Homo sapiens OX=9606 GN=PRPF3 PE=1 SV=2	|FKQC(BTD[C])PTENMAR	NA	NA	NA	NA	0.39	NA	0.56	NA	NA	NA	NA	0.84	NA	NA	NA	0.75	NA	NA	NA	NA	0.97	NA	1.19	1.29	NA	1.15	NA	NA	NA	NA	NA	NA	0.76	NA	NA	NA	NA	NA	NA	NA	NA	NA	NA	NA	NA
O43396	34	TXNL1	TXNL1_HUMAN Thioredoxin-like protein 1 OS=Homo sapiens OX=9606 GN=TXNL1 PE=1 SV=3	GC(BTD[C])GPCLR|GC(BTD[C])GPCLR	NA	NA	1.08	1.3	NA	0.98	NA	0.89	0.89	NA	NA	NA	NA	NA	NA	0.79	1.28	0.89	NA	NA	NA	NA	NA	NA	NA	0.75	1.6	NA	NA	NA	NA	NA	NA	NA	NA	NA	NA	NA	NA	NA	NA	NA	NA	NA	NA
O43396	37	TXNL1	TXNL1_HUMAN Thioredoxin-like protein 1 OS=Homo sapiens OX=9606 GN=TXNL1 PE=1 SV=3	|GCGPC(BTD[C])LR	NA	0.8	0.86	0.25	NA	NA	1.18	NA	0.96	NA	NA	0.65	NA	NA	NA	0.43	0.56	0.79	0.44	NA	0.45	NA	NA	0.62	NA	0.68	NA	NA	NA	NA	NA	NA	NA	NA	NA	NA	NA	NA	NA	NA	NA	NA	NA	NA	NA
O43399	74	TPD52L2	TPD54_HUMAN Tumor protein D54 OS=Homo sapiens OX=9606 GN=TPD52L2 PE=1 SV=2	ERHC(BTD[C])GELK|ERHC(BTD[C])GELK	NA	5.24	0.84	NA	0.33	1.46	NA	0.29	1.83	NA	0.92	0.81	1.34	NA	NA	0.88	0.99	0.98	0.88	0.9	0.89	4.54	NA	0.7	1.03	1.04	1.01	NA	4.18	0.61	0.63	2.03	0.98	1.12	1.85	0.57	0.56	0.42	1.03	0.57	0.36	NA	0.65	0.66	0.64
O43402	12	EMC8	EMC8_HUMAN ER membrane protein complex subunit 8 OS=Homo sapiens OX=9606 GN=EMC8 PE=1 SV=1	LTTQAYC(BTD[C])K|LTTQAYC(BTD[C])K	NA	NA	1.01	0.76	NA	1.05	NA	NA	1.05	NA	0.97	NA	NA	NA	NA	0.97	0.49	0.88	1.03	NA	0.97	1.2	NA	0.94	0.79	0.72	1.76	NA	NA	0.3	NA	NA	NA	NA	NA	NA	NA	NA	NA	NA	NA	NA	NA	NA	NA
O43402	210	EMC8	EMC8_HUMAN ER membrane protein complex subunit 8 OS=Homo sapiens OX=9606 GN=EMC8 PE=1 SV=1	|AVLHLC(BTD[C])	NA	2.33	NA	NA	NA	NA	NA	NA	NA	NA	NA	1.16	NA	NA	NA	NA	NA	NA	NA	NA	1.23	NA	NA	1.25	0.78	NA	NA	NA	NA	NA	NA	NA	NA	NA	NA	NA	NA	NA	NA	NA	NA	NA	NA	NA	NA
O43402	24	EMC8	EMC8_HUMAN ER membrane protein complex subunit 8 OS=Homo sapiens OX=9606 GN=EMC8 PE=1 SV=1	YPHC(BTD[C])AVNGLLVAEK|	NA	NA	NA	NA	NA	NA	NA	NA	NA	NA	NA	NA	NA	NA	NA	NA	NA	NA	NA	NA	0.98	NA	NA	NA	NA	NA	NA	NA	NA	NA	NA	NA	NA	NA	NA	0.57	NA	NA	NA	NA	NA	NA	NA	NA	NA
O43414	313	ERI3	ERI3_HUMAN ERI1 exoribonuclease 3 OS=Homo sapiens OX=9606 GN=ERI3 PE=1 SV=2	PHSGIDDC(BTD[C])K|	NA	NA	NA	NA	NA	1.04	NA	NA	1	NA	NA	1.19	NA	NA	NA	NA	NA	NA	NA	NA	1.16	NA	NA	NA	NA	NA	2.03	NA	NA	NA	NA	NA	NA	NA	NA	NA	NA	NA	NA	NA	NA	NA	NA	NA	NA
O43427	262	FIBP	FIBP_HUMAN Acidic fibroblast growth factor intracellular-binding protein OS=Homo sapiens OX=9606 GN=FIBP PE=1 SV=3	|SLVC(BTD[C])TALR	NA	NA	NA	NA	NA	NA	NA	NA	NA	NA	NA	NA	NA	NA	NA	0.75	0.94	1.03	NA	NA	1.41	NA	NA	NA	NA	0.95	NA	NA	NA	NA	NA	NA	NA	NA	NA	NA	NA	NA	NA	NA	NA	NA	NA	NA	NA
O43427	314	FIBP	FIBP_HUMAN Acidic fibroblast growth factor intracellular-binding protein OS=Homo sapiens OX=9606 GN=FIBP PE=1 SV=3	FVEPC(BTD[C])R|FVEPC(BTD[C])R	NA	NA	0.92	NA	NA	NA	NA	NA	1.18	NA	NA	0.71	NA	NA	NA	0.82	NA	NA	1.05	0.97	1.07	NA	NA	0.94	0.68	0.86	1.14	NA	NA	NA	NA	NA	NA	NA	NA	NA	NA	NA	NA	0.93	NA	NA	NA	0.92	NA
O43432	461	EIF4G3	IF4G3_HUMAN Eukaryotic translation initiation factor 4 gamma 3 OS=Homo sapiens OX=9606 GN=EIF4G3 PE=1 SV=2	|TC(BTD[C])LSEDAK	NA	NA	NA	NA	NA	NA	NA	NA	NA	NA	NA	NA	NA	NA	NA	NA	NA	NA	NA	NA	NA	NA	NA	NA	NA	NA	NA	NA	NA	NA	NA	NA	NA	NA	NA	NA	NA	NA	NA	NA	NA	NA	NA	NA	NA
O43432	1471	EIF4G3	IF4G3_HUMAN Eukaryotic translation initiation factor 4 gamma 3 OS=Homo sapiens OX=9606 GN=EIF4G3 PE=1 SV=2	ALMTAVC(BTD[C])K|	NA	NA	NA	NA	NA	NA	NA	NA	NA	NA	NA	NA	NA	NA	NA	NA	0.52	NA	NA	NA	NA	NA	NA	NA	NA	NA	NA	NA	NA	NA	NA	NA	NA	NA	NA	NA	NA	NA	NA	NA	NA	NA	NA	NA	NA
O43432	913	EIF4G3	IF4G3_HUMAN Eukaryotic translation initiation factor 4 gamma 3 OS=Homo sapiens OX=9606 GN=EIF4G3 PE=1 SV=2	|MLTEAIMHDC(BTD[C])VVK	NA	NA	NA	NA	NA	NA	NA	NA	NA	NA	NA	NA	NA	NA	NA	NA	NA	NA	NA	NA	NA	NA	NA	NA	NA	NA	NA	NA	NA	NA	NA	3.11	NA	NA	NA	NA	NA	NA	NA	NA	NA	NA	NA	NA	NA
O43447	47	PPIH	PPIH_HUMAN Peptidyl-prolyl cis-trans isomerase H OS=Homo sapiens OX=9606 GN=PPIH PE=1 SV=1	QFC(BTD[C])TGEFR|	NA	NA	1.03	NA	NA	1.34	NA	NA	NA	NA	NA	1.36	NA	NA	NA	NA	0.59	1.37	NA	NA	NA	1.83	NA	NA	1.05	NA	NA	NA	NA	0.36	NA	NA	NA	NA	NA	0.18	NA	0.56	NA	0.33	NA	0.29	NA	0.42	0.48
O43482	163	OIP5	MS18B_HUMAN Protein Mis18-beta OS=Homo sapiens OX=9606 GN=OIP5 PE=1 SV=2	GHFC(BTD[C])LSSDK|	NA	NA	NA	NA	NA	NA	NA	NA	NA	NA	NA	NA	NA	NA	NA	NA	0.8	NA	NA	NA	NA	NA	NA	NA	NA	NA	NA	NA	NA	NA	NA	NA	NA	NA	NA	NA	NA	NA	NA	NA	NA	NA	NA	NA	NA
O43491	488	EPB41L2	E41L2_HUMAN Band 4.1-like protein 2 OS=Homo sapiens OX=9606 GN=EPB41L2 PE=1 SV=1	VC(BTD[C])VEHHTFYR|	NA	1.25	NA	NA	1.02	NA	NA	0.96	NA	NA	2.6	1.36	1.03	NA	NA	NA	NA	0.98	0.89	NA	1.45	NA	NA	1.64	NA	NA	NA	NA	NA	NA	NA	NA	NA	NA	NA	NA	NA	1.19	NA	0.63	NA	NA	NA	NA	1.12
O43491	248	EPB41L2	E41L2_HUMAN Band 4.1-like protein 2 OS=Homo sapiens OX=9606 GN=EPB41L2 PE=1 SV=1	VC(BTD[C])EHLNLLEK|	NA	NA	NA	NA	NA	NA	NA	0.99	NA	NA	NA	NA	NA	NA	NA	NA	NA	0.84	NA	NA	NA	0.95	NA	NA	0.98	1.85	NA	NA	NA	NA	NA	NA	NA	NA	NA	NA	NA	0.54	NA	NA	NA	NA	NA	NA	0.73
O43497	1590	CACNA1G	CAC1G_HUMAN Voltage-dependent T-type calcium channel subunit alpha-1G OS=Homo sapiens OX=9606 GN=CACNA1G PE=1 SV=3	SEAQC(BTD[C])K|	NA	NA	NA	NA	NA	NA	NA	NA	NA	NA	NA	0.98	NA	NA	NA	NA	NA	NA	NA	NA	NA	NA	NA	NA	NA	1.74	NA	NA	NA	NA	NA	NA	NA	NA	NA	NA	NA	NA	NA	NA	NA	NA	NA	NA	NA
O43505	159	B4GAT1	B4GA1_HUMAN Beta-1,4-glucuronyltransferase 1 OS=Homo sapiens OX=9606 GN=B4GAT1 PE=1 SV=1	VAMHLVC(BTD[C])PSR|	NA	NA	NA	NA	NA	NA	NA	NA	NA	NA	NA	NA	NA	NA	NA	0.75	NA	NA	NA	NA	NA	NA	NA	NA	NA	NA	NA	NA	NA	NA	NA	NA	NA	NA	NA	NA	NA	NA	NA	NA	NA	NA	NA	NA	NA
O43505	182	B4GAT1	B4GA1_HUMAN Beta-1,4-glucuronyltransferase 1 OS=Homo sapiens OX=9606 GN=B4GAT1 PE=1 SV=1	|SC(BTD[C])QEVFDK	NA	NA	NA	NA	NA	NA	NA	NA	NA	NA	NA	NA	NA	NA	NA	NA	NA	NA	NA	NA	NA	NA	NA	NA	1.25	NA	NA	NA	NA	NA	NA	NA	NA	NA	NA	NA	NA	NA	NA	NA	NA	NA	NA	NA	NA
O43542	310	XRCC3	XRCC3_HUMAN DNA repair protein XRCC3 OS=Homo sapiens OX=9606 GN=XRCC3 PE=1 SV=1	LREEEAALGC(BTD[C])PAR|	NA	NA	NA	NA	NA	NA	0.73	NA	NA	NA	NA	NA	NA	NA	NA	NA	NA	NA	NA	NA	NA	NA	NA	NA	NA	NA	NA	NA	NA	NA	NA	NA	NA	0.94	NA	NA	NA	NA	NA	NA	NA	NA	NA	NA	NA
O43572	475	AKAP10	AKA10_HUMAN A-kinase anchor protein 10, mitochondrial OS=Homo sapiens OX=9606 GN=AKAP10 PE=1 SV=2	EGGPLPNC(BTD[C])FTTPLR|	NA	NA	NA	NA	NA	NA	NA	NA	NA	NA	NA	NA	NA	NA	NA	1.15	NA	NA	NA	NA	NA	NA	NA	NA	NA	NA	NA	NA	NA	NA	NA	NA	NA	NA	NA	NA	NA	NA	NA	NA	NA	NA	NA	NA	NA
O43592	845	XPOT	XPOT_HUMAN Exportin-T OS=Homo sapiens OX=9606 GN=XPOT PE=1 SV=2	TC(BTD[C])FIILSK|	NA	NA	NA	NA	NA	NA	0.92	NA	NA	NA	NA	NA	NA	NA	NA	NA	NA	NA	NA	NA	NA	NA	NA	NA	NA	NA	NA	NA	NA	NA	NA	NA	NA	NA	NA	NA	NA	NA	NA	NA	NA	NA	NA	NA	NA
O43598	26	DNPH1	DNPH1_HUMAN 2'-deoxynucleoside 5'-phosphate N-hydrolase 1 OS=Homo sapiens OX=9606 GN=DNPH1 PE=1 SV=1	GEPGRPALYFC(BTD[C])GSIR|	NA	NA	NA	NA	NA	NA	NA	NA	NA	NA	NA	NA	NA	NA	NA	NA	NA	NA	NA	NA	NA	NA	NA	NA	NA	NA	NA	0.4	NA	NA	NA	NA	NA	NA	NA	0.26	NA	NA	NA	NA	NA	NA	NA	NA	NA
O43617	31	TRAPPC3	TPPC3_HUMAN Trafficking protein particle complex subunit 3 OS=Homo sapiens OX=9606 GN=TRAPPC3 PE=1 SV=1	ALVTQLC(BTD[C])K|	NA	NA	NA	NA	NA	NA	NA	NA	NA	NA	NA	NA	NA	NA	NA	NA	NA	NA	NA	NA	1.02	NA	NA	NA	0.91	NA	NA	NA	NA	NA	NA	NA	NA	NA	NA	NA	NA	NA	NA	NA	NA	NA	NA	NA	NA
O43660	264	PLRG1	PLRG1_HUMAN Pleiotropic regulator 1 OS=Homo sapiens OX=9606 GN=PLRG1 PE=1 SV=1	SPYLFSC(BTD[C])GEDK|	NA	NA	NA	NA	NA	NA	NA	NA	NA	NA	NA	NA	NA	NA	NA	NA	NA	NA	NA	NA	NA	NA	NA	NA	NA	NA	NA	0.41	NA	NA	NA	NA	NA	NA	NA	NA	NA	NA	NA	NA	NA	NA	NA	NA	NA
O43660	338	PLRG1	PLRG1_HUMAN Pleiotropic regulator 1 OS=Homo sapiens OX=9606 GN=PLRG1 PE=1 SV=1	C(BTD[C])QAAEPQIITGSHDTTIR|	NA	NA	NA	NA	NA	NA	NA	NA	NA	NA	NA	NA	NA	NA	NA	NA	NA	NA	NA	NA	NA	NA	NA	NA	NA	NA	NA	0.27	NA	NA	NA	NA	NA	NA	NA	NA	NA	NA	NA	NA	0.51	NA	NA	NA	NA
O43663	531	PRC1	PRC1_HUMAN Protein regulator of cytokinesis 1 OS=Homo sapiens OX=9606 GN=PRC1 PE=1 SV=2	PVAASTC(BTD[C])SGK|	NA	NA	NA	NA	NA	NA	NA	NA	0.83	NA	NA	0.55	NA	NA	NA	0.68	NA	NA	NA	NA	0.76	NA	NA	0.87	0.75	NA	NA	NA	NA	NA	NA	NA	1.73	NA	1.86	NA	NA	1.18	NA	NA	NA	NA	NA	NA	NA
O43663	236	PRC1	PRC1_HUMAN Protein regulator of cytokinesis 1 OS=Homo sapiens OX=9606 GN=PRC1 PE=1 SV=2	SQNEAVC(BTD[C])EGLR|	NA	NA	1.1	NA	NA	1.5	NA	0.47	NA	NA	NA	NA	NA	NA	NA	NA	1.01	1.04	NA	NA	1.05	NA	NA	1.07	NA	1.29	NA	NA	NA	NA	NA	NA	NA	NA	NA	NA	NA	NA	NA	5.01	NA	NA	NA	NA	NA
O43663	72	PRC1	PRC1_HUMAN Protein regulator of cytokinesis 1 OS=Homo sapiens OX=9606 GN=PRC1 PE=1 SV=2	SISVC(BTD[C])QK|	NA	NA	0.96	0.52	NA	NA	NA	NA	NA	NA	NA	NA	NA	NA	NA	NA	NA	NA	1.04	NA	NA	NA	NA	NA	NA	NA	0.74	NA	NA	NA	NA	NA	NA	NA	NA	NA	NA	NA	NA	NA	NA	NA	NA	NA	NA
O43670	37	ZNF207	ZN207_HUMAN BUB3-interacting and GLEBS motif-containing protein ZNF207 OS=Homo sapiens OX=9606 GN=ZNF207 PE=1 SV=1	C(BTD[C])HICHK|	NA	NA	NA	NA	NA	NA	NA	NA	NA	NA	NA	NA	NA	NA	NA	NA	NA	NA	NA	NA	NA	NA	NA	0.56	NA	NA	NA	NA	NA	NA	NA	NA	NA	NA	NA	NA	NA	NA	NA	NA	NA	NA	NA	NA	NA
O43670	54	ZNF207	ZN207_HUMAN BUB3-interacting and GLEBS motif-containing protein ZNF207 OS=Homo sapiens OX=9606 GN=ZNF207 PE=1 SV=1	LYTGPGLAIHC(BTD[C])MQVHK|	NA	NA	NA	NA	NA	NA	NA	NA	NA	NA	NA	NA	NA	NA	NA	NA	0.9	NA	NA	NA	NA	NA	NA	0.89	NA	NA	NA	NA	NA	NA	NA	NA	NA	NA	NA	NA	NA	NA	NA	NA	NA	NA	NA	NA	NA
O43678	58	NDUFA2	NDUA2_HUMAN NADH dehydrogenase [ubiquinone] 1 alpha subcomplex subunit 2 OS=Homo sapiens OX=9606 GN=NDUFA2 PE=1 SV=3	EC(BTD[C])SDVQPK|	NA	NA	NA	NA	NA	NA	NA	NA	NA	NA	NA	NA	NA	NA	NA	NA	NA	NA	NA	NA	NA	NA	NA	NA	NA	NA	NA	NA	NA	NA	NA	NA	NA	NA	NA	NA	NA	NA	NA	NA	NA	NA	NA	NA	NA
O43678	24	NDUFA2	NDUA2_HUMAN NADH dehydrogenase [ubiquinone] 1 alpha subcomplex subunit 2 OS=Homo sapiens OX=9606 GN=NDUFA2 PE=1 SV=3	|IHLC(BTD[C])QR	NA	NA	NA	NA	NA	NA	NA	NA	NA	NA	NA	NA	NA	NA	NA	NA	0.53	NA	NA	NA	NA	NA	NA	NA	0.64	0.75	NA	NA	NA	NA	NA	NA	NA	NA	NA	NA	NA	NA	NA	NA	NA	NA	NA	NA	NA
O43681	55	ASNA1	ASNA_HUMAN ATPase ASNA1 OS=Homo sapiens OX=9606 GN=ASNA1 PE=1 SV=2	TTCSC(BTD[C])SLAVQLSK|	NA	NA	NA	NA	NA	NA	NA	NA	NA	NA	NA	1.39	NA	NA	NA	NA	NA	NA	NA	NA	1.28	NA	NA	NA	1.29	0.79	NA	NA	NA	NA	NA	NA	NA	NA	NA	NA	NA	NA	NA	NA	NA	NA	NA	NA	NA
O43681	268	ASNA1	ASNA_HUMAN ATPase ASNA1 OS=Homo sapiens OX=9606 GN=ASNA1 PE=1 SV=2	LIQELAKC(BTD[C])K|	NA	NA	NA	NA	NA	NA	NA	NA	NA	NA	NA	NA	NA	NA	NA	NA	NA	NA	NA	NA	NA	NA	NA	NA	NA	NA	NA	NA	NA	NA	NA	NA	NA	NA	NA	0.25	NA	NA	NA	NA	NA	NA	NA	NA	NA
O43683	1013	BUB1	BUB1_HUMAN Mitotic checkpoint serine/threonine-protein kinase BUB1 OS=Homo sapiens OX=9606 GN=BUB1 PE=1 SV=1	NEGGEC(BTD[C])KPEGLFR|	NA	NA	NA	NA	NA	NA	NA	NA	NA	NA	NA	NA	NA	NA	NA	NA	NA	NA	NA	NA	NA	NA	NA	NA	NA	NA	NA	NA	NA	NA	NA	NA	NA	NA	NA	NA	NA	NA	NA	NA	NA	NA	NA	NA	NA
O43683	184	BUB1	BUB1_HUMAN Mitotic checkpoint serine/threonine-protein kinase BUB1 OS=Homo sapiens OX=9606 GN=BUB1 PE=1 SV=1	|SNPGNNMAC(BTD[C])ISK	NA	NA	NA	NA	NA	NA	NA	NA	NA	NA	NA	NA	NA	NA	NA	NA	NA	NA	NA	NA	NA	NA	NA	NA	NA	NA	NA	NA	NA	NA	NA	NA	NA	NA	NA	NA	NA	NA	NA	NA	NA	NA	NA	NA	NA
O43684	270	BUB3	BUB3_HUMAN Mitotic checkpoint protein BUB3 OS=Homo sapiens OX=9606 GN=BUB3 PE=1 SV=1	LC(BTD[C])QFHR|	NA	1.7	1.11	NA	0.69	NA	0.87	0.82	1.33	0.44	1.48	1.27	NA	0.96	NA	0.98	0.86	1.07	0.87	0.72	1.19	NA	0.72	1.19	1.09	1.18	1.87	0.65	0.26	0.37	0.31	NA	NA	1.11	1.04	0.28	1.37	0.83	1.02	0.79	0.72	0.93	0.92	1.11	0.67
O43684	129	BUB3	BUB3_HUMAN Mitotic checkpoint protein BUB3 OS=Homo sapiens OX=9606 GN=BUB3 PE=1 SV=1	TPC(BTD[C])NAGTFSQPEK|	0.36	2.8	0.63	0.66	0.41	1.25	0.52	NA	0.93	0.41	0.95	NA	0.92	0.95	1.12	0.88	0.56	0.84	0.73	0.51	0.77	1.78	0.41	0.8	0.58	0.94	1.32	2.1	NA	NA	NA	1.71	1.21	0.9	0.86	NA	0.85	0.57	0.88	0.64	0.53	0.67	0.6	0.64	0.74
O43688	38	PLPP2	PLPP2_HUMAN Phospholipid phosphatase 2 OS=Homo sapiens OX=9606 GN=PLPP2 PE=1 SV=1	GFYC(BTD[C])GDDSIR|	NA	NA	NA	NA	NA	NA	NA	NA	NA	NA	NA	1	NA	NA	NA	0.94	NA	NA	NA	NA	NA	NA	NA	NA	NA	NA	NA	NA	NA	NA	NA	NA	NA	NA	NA	NA	NA	NA	NA	NA	NA	NA	NA	NA	NA
O43688	255	PLPP2	PLPP2_HUMAN Phospholipid phosphatase 2 OS=Homo sapiens OX=9606 GN=PLPP2 PE=1 SV=1	|ARPPQHC(BTD[C])LKEEELER	NA	NA	NA	NA	NA	NA	NA	NA	NA	NA	NA	NA	NA	NA	NA	NA	NA	NA	NA	NA	NA	NA	NA	NA	NA	NA	NA	NA	NA	NA	NA	NA	NA	NA	NA	NA	NA	NA	NA	NA	NA	NA	NA	NA	NA
O43707	793	ACTN4	ACTN4_HUMAN Alpha-actinin-4 OS=Homo sapiens OX=9606 GN=ACTN4 PE=1 SV=2	AC(BTD[C])LISLGYDVENDR|	NA	NA	NA	NA	1	NA	NA	NA	NA	0.49	NA	NA	NA	NA	NA	NA	NA	NA	NA	NA	NA	NA	NA	NA	NA	NA	NA	NA	NA	NA	NA	NA	NA	NA	NA	NA	NA	NA	NA	NA	NA	NA	NA	NA	NA
O43707	499	ACTN4	ACTN4_HUMAN Alpha-actinin-4 OS=Homo sapiens OX=9606 GN=ACTN4 PE=1 SV=2	|IC(BTD[C])DQWDALGSLTHSR	NA	1.43	0.99	0.99	1.19	NA	NA	0.84	NA	0.48	NA	0.75	0.8	NA	1.8	NA	NA	NA	0.83	NA	0.88	NA	NA	0.74	0.9	0.93	NA	NA	NA	0.95	0.66	NA	NA	1.14	NA	0.62	0.81	0.71	NA	0.6	NA	NA	0.86	NA	NA
O43708	16	GSTZ1	MAAI_HUMAN Maleylacetoacetate isomerase OS=Homo sapiens OX=9606 GN=GSTZ1 PE=1 SV=3	SSC(BTD[C])SWR|	NA	NA	NA	NA	NA	1.07	NA	0.54	NA	NA	NA	NA	NA	NA	NA	NA	NA	NA	NA	NA	NA	NA	NA	NA	0.77	NA	NA	NA	NA	NA	NA	NA	NA	NA	NA	NA	NA	NA	NA	NA	NA	NA	NA	NA	NA
O43715	47	TRIAP1	TRIA1_HUMAN TP53-regulated inhibitor of apoptosis 1 OS=Homo sapiens OX=9606 GN=TRIAP1 PE=1 SV=1	YQQC(BTD[C])VQK|	NA	NA	NA	0.41	NA	NA	NA	NA	NA	NA	NA	NA	0.8	NA	NA	NA	NA	NA	NA	NA	NA	NA	NA	NA	NA	NA	NA	NA	NA	NA	NA	NA	NA	NA	NA	NA	NA	NA	NA	NA	NA	NA	NA	NA	NA
O43719	480	HTATSF1	HTSF1_HUMAN HIV Tat-specific factor 1 OS=Homo sapiens OX=9606 GN=HTATSF1 PE=1 SV=1	RGFEGSC(BTD[C])SQK|	NA	NA	NA	NA	NA	NA	NA	NA	NA	NA	NA	NA	NA	NA	NA	NA	NA	NA	NA	NA	NA	NA	NA	NA	NA	NA	0.81	NA	NA	NA	1.78	NA	NA	NA	NA	0.73	NA	NA	NA	NA	NA	NA	NA	NA	NA
O43747	160	AP1G1	AP1G1_HUMAN AP-1 complex subunit gamma-1 OS=Homo sapiens OX=9606 GN=AP1G1 PE=1 SV=5	|AALC(BTD[C])AVHVIR	0.65	1.7	1.12	0.62	0.59	1.35	0.91	0.84	1.26	0.82	0.87	1.34	NA	NA	NA	0.92	0.71	1.32	1.03	0.68	1.11	2	0.95	1.09	0.92	1.2	4.02	NA	1.09	NA	0.08	NA	0.58	NA	NA	NA	0.34	NA	NA	NA	NA	NA	NA	NA	NA
O43747	539	AP1G1	AP1G1_HUMAN AP-1 complex subunit gamma-1 OS=Homo sapiens OX=9606 GN=AP1G1 PE=1 SV=5	FTC(BTD[C])TVNR|	0.75	2.69	0.75	NA	0.59	0.98	NA	0.62	0.97	NA	NA	0.67	NA	1.11	NA	1.09	0.69	0.76	NA	NA	0.92	2.53	0.6	0.89	1.06	0.79	1.06	NA	NA	NA	NA	1.69	NA	0.99	1.25	NA	1.07	0.95	1.08	NA	NA	1.13	NA	NA	NA
O43747	353	AP1G1	AP1G1_HUMAN AP-1 complex subunit gamma-1 OS=Homo sapiens OX=9606 GN=AP1G1 PE=1 SV=5	STIVDC(BTD[C])LK|	NA	1.84	1.37	NA	NA	1.79	1.03	1.2	3.13	NA	NA	NA	NA	NA	NA	NA	0.74	1.4	NA	0.47	1.49	NA	NA	1.05	1.07	1.3	NA	NA	NA	1.29	NA	NA	NA	NA	NA	NA	NA	NA	NA	NA	NA	NA	NA	NA	NA
O43747	400	AP1G1	AP1G1_HUMAN AP-1 complex subunit gamma-1 OS=Homo sapiens OX=9606 GN=AP1G1 PE=1 SV=5	ADC(BTD[C])ASGIFLAAEK|	NA	NA	1.05	0.6	0.77	NA	NA	NA	NA	NA	NA	1.04	NA	NA	NA	0.91	NA	NA	NA	NA	NA	NA	NA	1.03	1.02	0.89	NA	NA	NA	NA	NA	NA	NA	NA	NA	NA	NA	NA	NA	0.9	NA	NA	NA	NA	NA
O43747	47	AP1G1	AP1G1_HUMAN AP-1 complex subunit gamma-1 OS=Homo sapiens OX=9606 GN=AP1G1 PE=1 SV=5	|EEDNTYRC(BTD[C])R	0.49	NA	0.97	NA	NA	NA	1.01	0.8	NA	NA	NA	NA	NA	NA	NA	NA	NA	NA	NA	NA	NA	NA	1.04	1.14	NA	1.57	NA	NA	NA	NA	NA	NA	NA	NA	NA	NA	NA	NA	NA	NA	NA	NA	NA	NA	NA
O43747	106	AP1G1	AP1G1_HUMAN AP-1 complex subunit gamma-1 OS=Homo sapiens OX=9606 GN=AP1G1 PE=1 SV=5	QDVHLLMTNC(BTD[C])IK|	NA	NA	NA	NA	NA	1.9	NA	NA	NA	NA	NA	NA	NA	NA	NA	NA	1.19	NA	NA	NA	NA	1.59	NA	1.22	NA	NA	NA	NA	NA	NA	NA	NA	NA	NA	NA	NA	NA	NA	NA	NA	NA	NA	NA	NA	NA
O43760	59	SYNGR2	SNG2_HUMAN Synaptogyrin-2 OS=Homo sapiens OX=9606 GN=SYNGR2 PE=1 SV=1	|QMYC(BTD[C])VFNR	0.6	1.59	0.98	0.93	NA	NA	0.52	0.64	1.18	NA	NA	NA	NA	0.79	1.44	0.8	0.84	0.9	NA	0.78	NA	1.86	0.56	1.01	0.87	1.12	NA	NA	NA	NA	NA	1.83	1.48	NA	NA	NA	0.73	NA	NA	1.31	2.35	NA	NA	NA	NA
O43760	68	SYNGR2	SNG2_HUMAN Synaptogyrin-2 OS=Homo sapiens OX=9606 GN=SYNGR2 PE=1 SV=1	|NEDAC(BTD[C])R	NA	NA	NA	0.51	0.56	NA	NA	NA	NA	NA	NA	1.16	NA	NA	NA	NA	NA	NA	0.81	0.53	NA	NA	NA	NA	1.05	NA	NA	NA	NA	NA	NA	NA	1.47	NA	NA	NA	NA	3.07	NA	1.65	4.07	NA	NA	NA	NA
O43765	153	SGTA	SGTA_HUMAN Small glutamine-rich tetratricopeptide repeat-containing protein alpha OS=Homo sapiens OX=9606 GN=SGTA PE=1 SV=1	|AIC(BTD[C])IDPAYSK	0.64	2.92	1.05	NA	0.65	NA	0.7	0.55	1.43	0.99	NA	1.19	NA	NA	1.11	NA	NA	NA	0.8	0.55	1.31	NA	0.77	1.11	NA	NA	NA	NA	NA	NA	NA	NA	NA	NA	NA	NA	NA	0.8	1.04	NA	NA	1.03	NA	NA	0.57
O43765	129	SGTA	SGTA_HUMAN Small glutamine-rich tetratricopeptide repeat-containing protein alpha OS=Homo sapiens OX=9606 GN=SGTA PE=1 SV=1	AIELNPANAVYFC(BTD[C])NR|	NA	NA	NA	NA	NA	NA	NA	NA	NA	NA	NA	0.91	NA	NA	1.61	NA	0.55	NA	NA	NA	1.11	NA	NA	0.8	0.79	NA	NA	NA	NA	NA	NA	NA	NA	NA	NA	NA	NA	NA	NA	0.65	0.48	NA	NA	0.71	0.71
O43765	148	SGTA	SGTA_HUMAN Small glutamine-rich tetratricopeptide repeat-containing protein alpha OS=Homo sapiens OX=9606 GN=SGTA PE=1 SV=1	LGNYAGAVQDC(BTD[C])ER|	NA	NA	NA	NA	NA	NA	NA	NA	NA	NA	NA	0.96	NA	NA	NA	1.08	NA	NA	NA	NA	NA	NA	NA	NA	0.8	NA	NA	NA	NA	NA	NA	NA	NA	NA	NA	NA	NA	NA	NA	NA	NA	NA	NA	NA	NA
O43772	155	SLC25A20	MCAT_HUMAN Mitochondrial carnitine/acylcarnitine carrier protein OS=Homo sapiens OX=9606 GN=SLC25A20 PE=1 SV=1	YTGTLDC(BTD[C])AK|	NA	NA	NA	NA	NA	NA	NA	NA	NA	NA	NA	NA	NA	NA	NA	NA	NA	NA	NA	NA	0.91	NA	NA	NA	1.17	NA	NA	NA	NA	NA	NA	NA	NA	NA	NA	NA	NA	NA	NA	NA	NA	NA	NA	NA	NA
O43772	136	SLC25A20	MCAT_HUMAN Mitochondrial carnitine/acylcarnitine carrier protein OS=Homo sapiens OX=9606 GN=SLC25A20 PE=1 SV=1	IKC(BTD[C])LLQIQASSGESK|	NA	NA	NA	NA	NA	NA	NA	NA	NA	NA	NA	NA	NA	NA	NA	NA	NA	NA	NA	NA	NA	NA	NA	NA	NA	NA	NA	NA	NA	NA	NA	NA	NA	NA	NA	NA	NA	NA	NA	NA	NA	NA	NA	NA	NA
O43776	438	NARS	SYNC_HUMAN Asparagine--tRNA ligase, cytoplasmic OS=Homo sapiens OX=9606 GN=NARS PE=1 SV=1	LMTDTINEPILLC(BTD[C])R|	NA	NA	1	NA	0.61	NA	NA	0.94	NA	NA	NA	1.24	NA	NA	NA	1.3	0.94	NA	NA	NA	1.16	NA	NA	1	0.97	NA	NA	NA	NA	NA	NA	NA	NA	NA	NA	NA	NA	NA	NA	NA	NA	NA	NA	NA	NA
O43776	511	NARS	SYNC_HUMAN Asparagine--tRNA ligase, cytoplasmic OS=Homo sapiens OX=9606 GN=NARS PE=1 SV=1	YGTC(BTD[C])PHGGYGLGLER|	0.57	1.85	0.98	NA	NA	1.45	0.97	0.72	1.28	NA	NA	NA	NA	0.98	1.08	NA	0.77	NA	NA	NA	0.91	NA	0.62	1.24	1.21	1.47	NA	NA	NA	NA	0.66	2.1	NA	0.76	1.04	NA	NA	0.88	NA	NA	1.01	NA	1.01	0.97	NA
O43776	537	NARS	SYNC_HUMAN Asparagine--tRNA ligase, cytoplasmic OS=Homo sapiens OX=9606 GN=NARS PE=1 SV=1	DVC(BTD[C])LYPR|	0.43	2.01	0.97	0.63	NA	NA	NA	NA	1.08	NA	NA	1.07	0.7	NA	NA	0.83	NA	1.03	NA	NA	1.09	1.98	0.89	0.75	1.02	NA	NA	NA	NA	NA	NA	NA	NA	NA	NA	NA	NA	NA	NA	0.53	NA	NA	NA	NA	NA
O43776	359	NARS	SYNC_HUMAN Asparagine--tRNA ligase, cytoplasmic OS=Homo sapiens OX=9606 GN=NARS PE=1 SV=1	LEDLVC(BTD[C])DVVDR|	NA	NA	NA	NA	NA	NA	NA	NA	NA	NA	NA	NA	NA	NA	NA	NA	1.14	NA	NA	NA	NA	NA	NA	1.17	1.42	NA	NA	NA	NA	NA	NA	NA	NA	NA	NA	NA	NA	NA	NA	NA	NA	NA	NA	NA	0.84
O43795	103	MYO1B	MYO1B_HUMAN Unconventional myosin-Ib OS=Homo sapiens OX=9606 GN=MYO1B PE=1 SV=3	DQDKDQC(BTD[C])ILITGESGAGK|	NA	NA	NA	NA	NA	NA	NA	NA	NA	0.9	NA	NA	NA	NA	NA	NA	NA	NA	NA	NA	NA	NA	NA	NA	NA	NA	NA	NA	NA	NA	NA	NA	NA	NA	NA	NA	NA	NA	NA	NA	NA	NA	NA	NA	NA
O43795	595	MYO1B	MYO1B_HUMAN Unconventional myosin-Ib OS=Homo sapiens OX=9606 GN=MYO1B PE=1 SV=3	|C(BTD[C])IKPNDK	NA	NA	NA	NA	NA	NA	NA	NA	NA	0.65	NA	NA	NA	NA	NA	NA	NA	NA	NA	NA	NA	NA	NA	NA	NA	NA	NA	NA	NA	NA	NA	NA	NA	NA	NA	NA	NA	NA	NA	NA	NA	NA	NA	NA	NA
O43795	483	MYO1B	MYO1B_HUMAN Unconventional myosin-Ib OS=Homo sapiens OX=9606 GN=MYO1B PE=1 SV=3	LNQVC(BTD[C])ATHQHFESR|LNQVC(BTD[C])ATHQHFESR	NA	NA	1.08	NA	0.55	NA	NA	0.75	NA	NA	NA	1.6	NA	NA	NA	NA	0.59	1.17	NA	NA	0.96	NA	NA	NA	NA	0.88	NA	NA	NA	NA	NA	NA	NA	NA	1.39	NA	NA	NA	NA	NA	NA	NA	NA	NA	NA
O43795	1107	MYO1B	MYO1B_HUMAN Unconventional myosin-Ib OS=Homo sapiens OX=9606 GN=MYO1B PE=1 SV=3	QDKVC(BTD[C])VK|QDKVC(BTD[C])VK	NA	NA	NA	NA	NA	NA	NA	NA	NA	NA	NA	NA	NA	NA	1.85	NA	NA	NA	NA	NA	NA	NA	NA	NA	NA	NA	NA	NA	NA	NA	NA	1.52	NA	0.97	NA	0.91	1.38	NA	NA	NA	NA	1.01	NA	NA	NA
O43795	1123	MYO1B	MYO1B_HUMAN Unconventional myosin-Ib OS=Homo sapiens OX=9606 GN=MYO1B PE=1 SV=3	NGSVPTC(BTD[C])K|	NA	NA	1.05	NA	NA	NA	NA	NA	NA	NA	NA	NA	NA	NA	NA	NA	NA	NA	NA	NA	1.43	NA	NA	1.12	NA	1.03	NA	NA	NA	1	NA	NA	NA	NA	NA	0.68	NA	NA	NA	NA	NA	NA	NA	NA	NA
O43795	641	MYO1B	MYO1B_HUMAN Unconventional myosin-Ib OS=Homo sapiens OX=9606 GN=MYO1B PE=1 SV=3	QAYEPC(BTD[C])LER|QAYEPC(BTD[C])LER	NA	NA	NA	NA	NA	NA	NA	NA	NA	NA	NA	NA	NA	NA	NA	NA	NA	NA	NA	NA	NA	NA	NA	NA	0.91	NA	NA	NA	NA	NA	NA	NA	NA	NA	NA	NA	NA	NA	NA	NA	NA	NA	NA	NA	NA
O43805	30	SSNA1	SSNA1_HUMAN Sjoegren syndrome nuclear autoantigen 1 OS=Homo sapiens OX=9606 GN=SSNA1 PE=1 SV=2	REELC(BTD[C])R|REELC(BTD[C])R	NA	NA	NA	NA	NA	NA	NA	NA	NA	NA	NA	NA	NA	NA	1.29	NA	NA	NA	NA	NA	NA	NA	NA	NA	NA	NA	NA	NA	NA	NA	NA	NA	NA	0.65	1.12	NA	NA	NA	NA	0.63	NA	NA	NA	NA	NA
O43813	133	LANCL1	LANC1_HUMAN Glutathione S-transferase LANCL1 OS=Homo sapiens OX=9606 GN=LANCL1 PE=1 SV=1	QAEDC(BTD[C])ITR|	NA	NA	NA	NA	NA	NA	NA	NA	NA	NA	NA	NA	NA	NA	NA	NA	NA	NA	NA	NA	0.74	NA	NA	NA	0.93	NA	NA	NA	NA	NA	NA	NA	NA	NA	NA	NA	NA	NA	NA	NA	NA	NA	NA	NA	NA
O43813	98	LANCL1	LANC1_HUMAN Glutathione S-transferase LANCL1 OS=Homo sapiens OX=9606 GN=LANCL1 PE=1 SV=1	QSLNC(BTD[C])LTK|	NA	NA	NA	NA	NA	NA	NA	NA	NA	NA	NA	NA	NA	NA	NA	NA	NA	NA	NA	NA	NA	NA	NA	NA	0.81	NA	NA	NA	NA	NA	NA	NA	NA	NA	NA	NA	NA	NA	NA	NA	NA	NA	NA	NA	NA
O43815	740	STRN	STRN_HUMAN Striatin OS=Homo sapiens OX=9606 GN=STRN PE=1 SV=4	TC(BTD[C])IQEFTAHR|TC(BTD[C])IQEFTAHR	NA	1.23	NA	NA	0.7	NA	NA	NA	NA	0.64	1.58	NA	NA	NA	0.86	1.33	NA	NA	NA	NA	NA	NA	NA	NA	NA	NA	NA	NA	NA	NA	NA	NA	NA	NA	NA	NA	NA	NA	NA	0.7	NA	1.14	NA	0.76	NA
O43818	296	RRP9	U3IP2_HUMAN U3 small nucleolar RNA-interacting protein 2 OS=Homo sapiens OX=9606 GN=RRP9 PE=1 SV=1	EC(BTD[C])CVTAGGR|	NA	NA	NA	NA	NA	NA	NA	NA	NA	NA	NA	NA	NA	NA	NA	NA	NA	1.1	1.05	NA	NA	NA	NA	NA	NA	NA	NA	NA	NA	NA	NA	NA	NA	NA	NA	NA	NA	NA	NA	NA	NA	NA	NA	NA	0.7
O43818	460	RRP9	U3IP2_HUMAN U3 small nucleolar RNA-interacting protein 2 OS=Homo sapiens OX=9606 GN=RRP9 PE=1 SV=1	NSVC(BTD[C])IIPLR|	NA	NA	NA	NA	NA	NA	NA	NA	NA	NA	NA	NA	NA	NA	NA	NA	0.63	NA	NA	NA	1.11	NA	NA	NA	0.94	1.08	NA	NA	NA	NA	NA	NA	NA	NA	NA	NA	NA	NA	NA	NA	NA	NA	NA	NA	NA
O43818	168	RRP9	U3IP2_HUMAN U3 small nucleolar RNA-interacting protein 2 OS=Homo sapiens OX=9606 GN=RRP9 PE=1 SV=1	|DC(BTD[C])SIIK	NA	NA	NA	NA	NA	NA	NA	NA	NA	NA	NA	1.25	NA	NA	NA	NA	NA	NA	NA	NA	NA	NA	NA	NA	NA	NA	NA	0.19	NA	NA	NA	NA	NA	NA	NA	NA	NA	NA	NA	NA	NA	NA	NA	NA	NA
O43818	297	RRP9	U3IP2_HUMAN U3 small nucleolar RNA-interacting protein 2 OS=Homo sapiens OX=9606 GN=RRP9 PE=1 SV=1	|ECC(BTD[C])VTAGGR	NA	NA	NA	NA	NA	NA	NA	NA	NA	NA	NA	NA	NA	NA	NA	NA	NA	NA	NA	NA	NA	NA	NA	NA	0.72	NA	NA	NA	NA	NA	NA	NA	NA	NA	NA	NA	NA	NA	NA	NA	NA	NA	NA	NA	NA
O43824	99	GTPBP6	GTPB6_HUMAN Putative GTP-binding protein 6 OS=Homo sapiens OX=9606 GN=GTPBP6 PE=2 SV=4	|VC(BTD[C])LVHPDVK	NA	NA	NA	NA	NA	NA	NA	NA	NA	NA	NA	NA	NA	NA	NA	NA	NA	NA	NA	NA	NA	NA	NA	NA	NA	0.72	NA	NA	NA	NA	NA	NA	NA	NA	NA	NA	NA	NA	NA	NA	NA	NA	NA	NA	NA
O43837	185	IDH3B	IDH3B_HUMAN Isocitrate dehydrogenase [NAD] subunit beta, mitochondrial OS=Homo sapiens OX=9606 GN=IDH3B PE=1 SV=2	GVIEC(BTD[C])LK|	NA	NA	0.86	0.54	NA	NA	NA	NA	NA	NA	NA	1.39	NA	NA	NA	1.14	NA	NA	NA	NA	NA	NA	NA	0.92	1.03	0.99	NA	NA	NA	NA	NA	NA	NA	NA	NA	NA	NA	NA	NA	NA	NA	0.78	NA	NA	NA
O43847	1027	NRDC	NRDC_HUMAN Nardilysin OS=Homo sapiens OX=9606 GN=NRDC PE=1 SV=3	|LKEC(BTD[C])EDTHLGEEVDR	NA	2.36	1.34	NA	NA	NA	NA	0.7	NA	NA	NA	1.52	NA	NA	1.57	1.85	1.05	1.74	NA	NA	2.13	2.16	NA	NA	NA	1.69	NA	NA	NA	NA	NA	NA	NA	0.98	NA	NA	0.94	0.83	0.97	NA	0.72	1.09	0.73	0.88	0.55
O43847	620	NRDC	NRDC_HUMAN Nardilysin OS=Homo sapiens OX=9606 GN=NRDC PE=1 SV=3	ANLVLLSGANEGKC(BTD[C])DLK|	NA	NA	1.04	NA	NA	NA	NA	NA	0.85	NA	NA	1.08	NA	NA	NA	NA	0.69	NA	NA	NA	0.93	NA	NA	0.87	0.88	0.86	NA	NA	NA	NA	NA	NA	NA	NA	NA	NA	NA	NA	NA	0.5	0.46	0.86	NA	NA	NA
O43847	269	NRDC	NRDC_HUMAN Nardilysin OS=Homo sapiens OX=9606 GN=NRDC PE=1 SV=3	HGGSDNASTDC(BTD[C])ER|	NA	NA	NA	NA	NA	NA	NA	NA	NA	NA	NA	NA	NA	NA	NA	NA	NA	NA	NA	NA	NA	NA	NA	NA	NA	NA	NA	NA	NA	NA	NA	NA	NA	NA	NA	NA	NA	0.27	NA	NA	NA	NA	NA	NA	NA
O43865	106	AHCYL1	SAHH2_HUMAN S-adenosylhomocysteine hydrolase-like protein 1 OS=Homo sapiens OX=9606 GN=AHCYL1 PE=1 SV=2	GSSNFC(BTD[C])VK|	0.45	3.49	1.04	NA	NA	1.71	0.47	NA	NA	NA	1.05	0.81	1.08	NA	NA	NA	0.63	NA	0.9	1	1.01	NA	NA	0.94	0.99	1.07	1.52	NA	NA	NA	NA	NA	NA	NA	NA	0.54	NA	NA	NA	NA	NA	NA	NA	NA	NA
O43865	272	AHCYL1	SAHH2_HUMAN S-adenosylhomocysteine hydrolase-like protein 1 OS=Homo sapiens OX=9606 GN=AHCYL1 PE=1 SV=2	|LC(BTD[C])VPAMNVNDSVTK	NA	NA	NA	NA	0.62	NA	NA	0.59	NA	NA	NA	NA	NA	NA	NA	NA	NA	NA	NA	NA	NA	NA	NA	NA	NA	NA	NA	NA	NA	NA	NA	NA	NA	NA	NA	NA	NA	NA	NA	NA	NA	NA	NA	NA	NA
O43865	327	AHCYL1	SAHH2_HUMAN S-adenosylhomocysteine hydrolase-like protein 1 OS=Homo sapiens OX=9606 GN=AHCYL1 PE=1 SV=2	|GCC(BTD[C])AALK	NA	NA	NA	NA	NA	NA	NA	NA	NA	NA	NA	NA	NA	NA	NA	NA	NA	NA	NA	NA	0.96	NA	NA	0.66	1.17	NA	NA	NA	NA	NA	NA	NA	NA	NA	NA	NA	NA	NA	NA	NA	NA	NA	NA	NA	NA
O43913	237	ORC5	ORC5_HUMAN Origin recognition complex subunit 5 OS=Homo sapiens OX=9606 GN=ORC5 PE=1 SV=1	|YC(BTD[C])EPVVK	NA	NA	NA	NA	NA	NA	NA	NA	NA	NA	NA	NA	NA	NA	NA	NA	NA	NA	NA	NA	NA	NA	NA	NA	NA	NA	NA	NA	NA	NA	NA	NA	NA	NA	NA	NA	NA	NA	NA	NA	NA	NA	NA	NA	NA
O43929	16	ORC4	ORC4_HUMAN Origin recognition complex subunit 4 OS=Homo sapiens OX=9606 GN=ORC4 PE=1 SV=2	SNSLIHTEC(BTD[C])LSQVQR|	NA	2	0.95	NA	0.61	1.28	NA	NA	1.13	NA	NA	NA	NA	NA	NA	NA	NA	0.99	NA	NA	NA	NA	NA	NA	NA	NA	NA	NA	NA	NA	NA	NA	NA	NA	NA	NA	NA	NA	NA	NA	NA	NA	NA	NA	NA
O60216	585	RAD21	RAD21_HUMAN Double-strand-break repair protein rad21 homolog OS=Homo sapiens OX=9606 GN=RAD21 PE=1 SV=2	TGAESISLLELC(BTD[C])R|	NA	NA	NA	NA	NA	NA	NA	NA	NA	NA	NA	NA	NA	NA	NA	NA	NA	NA	NA	NA	NA	NA	NA	NA	NA	NA	NA	0.13	NA	NA	NA	NA	NA	NA	NA	NA	NA	NA	NA	NA	1.03	NA	NA	0.71	NA
O60218	187	AKR1B10	AK1BA_HUMAN Aldo-keto reductase family 1 member B10 OS=Homo sapiens OX=9606 GN=AKR1B10 PE=1 SV=2	|YKPVTNQVEC(BTD[C])HPYLTQEK	NA	NA	NA	NA	NA	NA	NA	NA	1.04	NA	NA	1.36	NA	NA	NA	NA	0.67	1.15	NA	NA	NA	1.12	NA	NA	NA	NA	2.92	NA	NA	NA	NA	NA	NA	NA	NA	NA	NA	NA	NA	NA	NA	NA	NA	NA	NA
O60218	200	AKR1B10	AK1BA_HUMAN Aldo-keto reductase family 1 member B10 OS=Homo sapiens OX=9606 GN=AKR1B10 PE=1 SV=2	|LIQYC(BTD[C])HSK	NA	NA	NA	NA	NA	NA	NA	NA	1.05	NA	NA	1.04	NA	NA	NA	NA	0.45	0.94	NA	NA	NA	NA	NA	NA	NA	NA	NA	NA	NA	NA	NA	NA	NA	NA	NA	NA	NA	NA	NA	NA	NA	NA	NA	NA	NA
O60231	450	DHX16	DHX16_HUMAN Pre-mRNA-splicing factor ATP-dependent RNA helicase DHX16 OS=Homo sapiens OX=9606 GN=DHX16 PE=1 SV=2	IAC(BTD[C])TQPR|	NA	NA	NA	NA	1.21	NA	0.47	0.71	NA	NA	NA	0.6	NA	0.86	1.54	0.91	0.41	0.69	NA	NA	0.76	NA	NA	0.57	0.46	0.7	NA	1.54	NA	NA	NA	NA	1.01	0.87	NA	NA	0.99	1.03	0.98	NA	NA	0.63	NA	0.86	NA
O60232	125	ZNRD2	ZNRD2_HUMAN Protein ZNRD2 OS=Homo sapiens OX=9606 GN=ZNRD2 PE=1 SV=1	PAPQPPVPRPEHC(BTD[C])EGAAAGLK|	0.57	NA	0.97	0.54	0.5	1	0.73	0.47	NA	0.45	NA	NA	NA	NA	NA	1.01	NA	NA	0.7	0.63	1.17	NA	0.6	0.85	NA	0.9	NA	NA	NA	NA	NA	NA	NA	NA	NA	NA	NA	NA	NA	NA	NA	NA	NA	NA	NA
O60232	187	ZNRD2	ZNRD2_HUMAN Protein ZNRD2 OS=Homo sapiens OX=9606 GN=ZNRD2 PE=1 SV=1	AC(BTD[C])AEALR|	NA	NA	1.07	0.27	NA	NA	NA	NA	1.1	NA	NA	1.35	NA	NA	NA	0.99	0.54	0.86	0.67	0.44	1.21	NA	NA	1.07	0.94	1.07	2.22	0.13	NA	NA	NA	NA	NA	NA	NA	NA	NA	NA	NA	NA	NA	NA	NA	NA	NA
O60244	1433	MED14	MED14_HUMAN Mediator of RNA polymerase II transcription subunit 14 OS=Homo sapiens OX=9606 GN=MED14 PE=1 SV=2	QGEC(BTD[C])TIFAAVR|	NA	NA	NA	NA	NA	NA	0.74	0.68	NA	NA	NA	NA	NA	NA	NA	NA	NA	NA	NA	NA	NA	NA	NA	NA	NA	NA	NA	NA	NA	NA	NA	NA	NA	NA	NA	NA	NA	NA	NA	NA	NA	NA	NA	NA	NA
O60244	1249	MED14	MED14_HUMAN Mediator of RNA polymerase II transcription subunit 14 OS=Homo sapiens OX=9606 GN=MED14 PE=1 SV=2	|TDALKC(BTD[C])R	NA	1.6	0.54	NA	NA	NA	NA	NA	NA	NA	NA	NA	NA	NA	NA	NA	NA	NA	NA	NA	0.73	NA	NA	NA	NA	0.95	1.39	NA	NA	NA	NA	NA	NA	NA	NA	NA	NA	NA	NA	0.42	NA	NA	NA	NA	NA
O60244	1316	MED14	MED14_HUMAN Mediator of RNA polymerase II transcription subunit 14 OS=Homo sapiens OX=9606 GN=MED14 PE=1 SV=2	|DC(BTD[C])VHIMK	NA	NA	NA	NA	NA	NA	NA	NA	NA	NA	NA	NA	NA	NA	NA	NA	0.73	NA	NA	NA	NA	NA	NA	NA	NA	1.08	NA	NA	NA	NA	NA	NA	NA	NA	NA	NA	NA	NA	NA	NA	NA	NA	NA	NA	NA
O60244	635	MED14	MED14_HUMAN Mediator of RNA polymerase II transcription subunit 14 OS=Homo sapiens OX=9606 GN=MED14 PE=1 SV=2	AGEMC(BTD[C])AFNK|	NA	NA	NA	NA	NA	NA	NA	NA	NA	NA	NA	0.84	NA	NA	NA	NA	1.05	NA	NA	NA	NA	NA	NA	NA	0.89	NA	NA	NA	NA	NA	NA	NA	NA	NA	NA	NA	NA	NA	NA	NA	NA	NA	NA	NA	NA
O60264	259	SMARCA5	SMCA5_HUMAN SWI/SNF-related matrix-associated actin-dependent regulator of chromatin subfamily A member 5 OS=Homo sapiens OX=9606 GN=SMARCA5 PE=1 SV=1	|SVC(BTD[C])LIGDK	0.36	2.34	0.98	0.71	0.4	1.22	0.47	NA	NA	NA	NA	0.97	NA	0.93	1.58	1	0.73	0.96	0.92	NA	0.81	2.12	0.53	0.84	0.75	1.06	1.69	0.64	NA	NA	NA	1.15	NA	1.03	1.23	0.09	1.19	0.44	1.25	0.82	NA	0.23	NA	0.74	0.76
O60264	165	SMARCA5	SMCA5_HUMAN SWI/SNF-related matrix-associated actin-dependent regulator of chromatin subfamily A member 5 OS=Homo sapiens OX=9606 GN=SMARCA5 PE=1 SV=1	ATNVC(BTD[C])TR|ATNVC(BTD[C])TR	0.28	2.77	0.49	0.78	NA	1.01	0.34	NA	0.72	NA	NA	0.76	0.82	1.06	1.98	0.79	NA	0.56	1.33	1.14	0.7	2.69	0.32	NA	0.66	0.64	NA	2.67	3.63	0.92	NA	1.6	1.47	NA	NA	0.6	0.52	NA	NA	0.93	NA	NA	NA	NA	NA
O60264	374	SMARCA5	SMCA5_HUMAN SWI/SNF-related matrix-associated actin-dependent regulator of chromatin subfamily A member 5 OS=Homo sapiens OX=9606 GN=SMARCA5 PE=1 SV=1	|NC(BTD[C])LGDQK	NA	NA	NA	NA	NA	NA	NA	NA	0.86	NA	NA	NA	NA	NA	2.48	NA	NA	NA	NA	NA	NA	NA	NA	NA	NA	NA	NA	NA	NA	NA	NA	NA	NA	NA	NA	NA	NA	NA	NA	NA	NA	NA	NA	NA	NA
O60264	527	SMARCA5	SMCA5_HUMAN SWI/SNF-related matrix-associated actin-dependent regulator of chromatin subfamily A member 5 OS=Homo sapiens OX=9606 GN=SMARCA5 PE=1 SV=1	NYEYC(BTD[C])R|	NA	NA	1.01	NA	NA	NA	NA	NA	NA	NA	NA	1.21	NA	NA	NA	NA	0.93	NA	NA	NA	1.3	NA	NA	NA	0.93	NA	NA	NA	NA	NA	NA	NA	NA	NA	NA	NA	NA	NA	NA	NA	NA	NA	NA	NA	NA
O60264	1001	SMARCA5	SMCA5_HUMAN SWI/SNF-related matrix-associated actin-dependent regulator of chromatin subfamily A member 5 OS=Homo sapiens OX=9606 GN=SMARCA5 PE=1 SV=1	RC(BTD[C])NTLITLIER|	NA	NA	NA	NA	NA	NA	NA	NA	NA	NA	NA	NA	NA	NA	NA	NA	0.48	NA	NA	NA	NA	NA	NA	1.18	0.75	NA	NA	NA	NA	NA	NA	NA	NA	NA	NA	NA	NA	NA	NA	NA	NA	NA	NA	NA	NA
O60271	443	SPAG9	JIP4_HUMAN C-Jun-amino-terminal kinase-interacting protein 4 OS=Homo sapiens OX=9606 GN=SPAG9 PE=1 SV=4	VDELTC(BTD[C])EKDVLQGELEAVK|	NA	NA	NA	NA	NA	NA	NA	NA	NA	NA	NA	NA	NA	NA	NA	NA	NA	NA	NA	NA	1.05	NA	NA	1	NA	NA	NA	NA	NA	NA	NA	NA	NA	NA	NA	NA	NA	NA	NA	NA	NA	NA	NA	NA	NA
O60287	1900	URB1	NPA1P_HUMAN Nucleolar pre-ribosomal-associated protein 1 OS=Homo sapiens OX=9606 GN=URB1 PE=1 SV=4	|LC(BTD[C])QPSSQEPAKR	0.5	NA	NA	NA	0.4	NA	NA	NA	NA	NA	NA	1	NA	NA	NA	0.9	0.73	0.93	NA	NA	0.91	NA	NA	NA	0.74	NA	NA	NA	NA	NA	NA	NA	NA	NA	NA	NA	NA	NA	NA	NA	NA	NA	NA	NA	NA
O60287	968	URB1	NPA1P_HUMAN Nucleolar pre-ribosomal-associated protein 1 OS=Homo sapiens OX=9606 GN=URB1 PE=1 SV=4	LVVHC(BTD[C])EQLDAQNQQR|	NA	1.67	NA	0.65	NA	NA	NA	NA	NA	NA	NA	NA	NA	NA	NA	NA	NA	NA	NA	NA	NA	NA	NA	NA	NA	0.96	0.85	NA	NA	NA	NA	NA	NA	NA	NA	NA	NA	NA	NA	NA	NA	NA	NA	NA	NA
O60287	473	URB1	NPA1P_HUMAN Nucleolar pre-ribosomal-associated protein 1 OS=Homo sapiens OX=9606 GN=URB1 PE=1 SV=4	TVDHC(BTD[C])LNK|	NA	2.39	NA	NA	NA	NA	NA	NA	NA	NA	NA	NA	NA	NA	NA	0.79	NA	NA	NA	NA	NA	NA	NA	NA	0.62	0.66	1.64	NA	NA	NA	NA	NA	NA	NA	NA	NA	NA	NA	NA	NA	NA	NA	NA	NA	NA
O60287	1801	URB1	NPA1P_HUMAN Nucleolar pre-ribosomal-associated protein 1 OS=Homo sapiens OX=9606 GN=URB1 PE=1 SV=4	DKQC(BTD[C])YELCAR|	NA	NA	NA	NA	NA	NA	NA	NA	NA	NA	NA	NA	NA	NA	NA	NA	NA	NA	NA	NA	NA	NA	NA	NA	NA	NA	NA	NA	NA	NA	NA	NA	NA	NA	NA	NA	NA	NA	NA	NA	NA	NA	NA	NA	NA
O60287	169	URB1	NPA1P_HUMAN Nucleolar pre-ribosomal-associated protein 1 OS=Homo sapiens OX=9606 GN=URB1 PE=1 SV=4	DVC(BTD[C])SHFDLNK|	NA	NA	NA	NA	NA	NA	NA	NA	NA	NA	NA	NA	NA	NA	NA	NA	NA	NA	NA	NA	NA	NA	NA	NA	NA	NA	NA	NA	NA	NA	NA	NA	NA	NA	NA	NA	NA	NA	NA	NA	NA	NA	NA	NA	NA
O60293	1068	ZFC3H1	ZC3H1_HUMAN Zinc finger C3H1 domain-containing protein OS=Homo sapiens OX=9606 GN=ZFC3H1 PE=1 SV=3	|HTDTANKEC(BTD[C])INK	NA	NA	NA	NA	NA	NA	NA	NA	NA	NA	NA	NA	NA	NA	NA	NA	NA	NA	NA	NA	NA	NA	NA	NA	NA	NA	NA	NA	NA	NA	NA	NA	NA	NA	1.16	NA	NA	NA	NA	NA	NA	NA	NA	NA	NA
O60306	250	AQR	AQR_HUMAN RNA helicase aquarius OS=Homo sapiens OX=9606 GN=AQR PE=1 SV=4	VHYC(BTD[C])ER|	NA	1.74	1.02	NA	NA	1.44	NA	NA	1.05	NA	0.81	1.03	NA	NA	NA	1.11	0.62	1.18	0.82	NA	1.1	1.63	NA	0.99	0.94	1.23	2.59	NA	NA	NA	NA	NA	NA	NA	NA	NA	NA	NA	NA	NA	NA	NA	NA	NA	NA
O60313	801	OPA1	OPA1_HUMAN Dynamin-like 120 kDa protein, mitochondrial OS=Homo sapiens OX=9606 GN=OPA1 PE=1 SV=3	MLKC(BTD[C])NEEHPAYLASDEITTVR|	NA	2.32	NA	NA	NA	NA	NA	NA	NA	NA	NA	NA	NA	NA	NA	1.09	1.02	NA	NA	NA	0.96	NA	NA	NA	NA	NA	NA	NA	NA	NA	NA	1.52	NA	NA	NA	NA	NA	NA	NA	NA	NA	NA	NA	1.04	0.96
O60313	786	OPA1	OPA1_HUMAN Dynamin-like 120 kDa protein, mitochondrial OS=Homo sapiens OX=9606 GN=OPA1 PE=1 SV=3	TQEQC(BTD[C])VHNETK|TQEQC(BTD[C])VHNETK	NA	5.74	0.98	0.68	NA	1.56	NA	NA	0.89	NA	1.19	0.99	NA	0.85	NA	1.1	0.95	1.72	0.9	0.52	0.84	2.57	0.33	0.74	0.98	1.01	2.07	NA	1.01	1.43	2	1.57	0.98	0.83	1.16	1.3	0.85	0.97	1.03	0.76	NA	0.93	2.02	1.05	0.74
O60313	856	OPA1	OPA1_HUMAN Dynamin-like 120 kDa protein, mitochondrial OS=Homo sapiens OX=9606 GN=OPA1 PE=1 SV=3	TALNHCNLC(BTD[C])R|	NA	NA	NA	NA	NA	NA	NA	NA	NA	NA	NA	NA	NA	NA	NA	NA	1.1	NA	NA	NA	0.93	NA	NA	1.04	NA	NA	NA	NA	NA	NA	NA	NA	NA	NA	NA	NA	NA	NA	NA	NA	NA	NA	NA	NA	NA
O60313	853	OPA1	OPA1_HUMAN Dynamin-like 120 kDa protein, mitochondrial OS=Homo sapiens OX=9606 GN=OPA1 PE=1 SV=3	|TALNHC(BTD[C])NLCR	NA	NA	1.15	NA	NA	NA	NA	NA	NA	NA	NA	1.09	NA	NA	NA	NA	1.04	NA	NA	NA	NA	NA	NA	0.66	NA	NA	2.82	NA	NA	NA	NA	NA	NA	NA	NA	NA	NA	NA	NA	NA	NA	NA	NA	NA	NA
O60313	375	OPA1	OPA1_HUMAN Dynamin-like 120 kDa protein, mitochondrial OS=Homo sapiens OX=9606 GN=OPA1 PE=1 SV=3	EGC(BTD[C])TVSPETISLNVK|	NA	NA	NA	NA	NA	NA	NA	NA	NA	NA	NA	NA	NA	NA	NA	0.76	NA	NA	NA	NA	NA	NA	NA	NA	NA	NA	NA	NA	NA	NA	NA	NA	NA	NA	NA	NA	0.58	NA	NA	NA	NA	NA	NA	NA	NA
O60341	360	KDM1A	KDM1A_HUMAN Lysine-specific histone demethylase 1A OS=Homo sapiens OX=9606 GN=KDM1A PE=1 SV=2	|QKC(BTD[C])PLYEANGQAVPK	NA	NA	NA	NA	0.27	NA	NA	0.78	NA	NA	NA	NA	NA	NA	1.24	NA	NA	NA	NA	NA	NA	NA	0.43	NA	NA	NA	NA	NA	NA	NA	NA	NA	NA	0.74	1.01	NA	0.95	NA	NA	NA	NA	NA	NA	0.94	1.09
O60341	491	KDM1A	KDM1A_HUMAN Lysine-specific histone demethylase 1A OS=Homo sapiens OX=9606 GN=KDM1A PE=1 SV=2	|DLTALC(BTD[C])K	NA	NA	0.97	NA	NA	NA	NA	NA	1.14	NA	NA	NA	NA	NA	NA	NA	NA	1.76	NA	NA	NA	2.42	NA	NA	NA	0.97	NA	NA	NA	NA	NA	NA	NA	NA	NA	NA	NA	NA	NA	NA	NA	NA	NA	NA	NA
O60341	665	KDM1A	KDM1A_HUMAN Lysine-specific histone demethylase 1A OS=Homo sapiens OX=9606 GN=KDM1A PE=1 SV=2	|VVLC(BTD[C])FDR	NA	NA	NA	NA	NA	NA	NA	NA	NA	NA	NA	NA	NA	NA	NA	NA	NA	NA	NA	NA	NA	NA	NA	NA	1.07	NA	NA	NA	NA	NA	NA	NA	NA	NA	NA	NA	NA	NA	NA	NA	NA	NA	NA	NA	NA
O60343	74	TBC1D4	TBCD4_HUMAN TBC1 domain family member 4 OS=Homo sapiens OX=9606 GN=TBC1D4 PE=1 SV=2	SQKPEAGGC(BTD[C])GAPAAR|SQKPEAGGC(BTD[C])GAPAAR	0.33	2.83	0.83	NA	NA	1.16	0.49	0.4	0.88	NA	NA	NA	NA	1.03	NA	0.73	0.78	0.84	0.81	0.9	0.94	2.58	0.47	0.82	0.55	0.93	1.14	NA	2.42	1.11	NA	1.52	1.17	0.94	1.03	0.78	1	NA	1.05	NA	0.94	NA	NA	NA	NA
O60343	316	TBC1D4	TBCD4_HUMAN TBC1 domain family member 4 OS=Homo sapiens OX=9606 GN=TBC1D4 PE=1 SV=2	|SRC(BTD[C])SSVTGVQR	0.38	NA	NA	NA	NA	NA	0.24	NA	NA	NA	NA	NA	NA	NA	NA	0.98	0.66	0.58	NA	NA	0.67	NA	NA	0.46	0.51	NA	NA	NA	NA	NA	NA	NA	NA	NA	NA	NA	NA	NA	NA	NA	NA	NA	NA	NA	NA
O60343	388	TBC1D4	TBCD4_HUMAN TBC1 domain family member 4 OS=Homo sapiens OX=9606 GN=TBC1D4 PE=1 SV=2	DISSC(BTD[C])SQGIK|	NA	NA	NA	NA	NA	NA	NA	NA	NA	NA	NA	NA	NA	NA	NA	NA	NA	NA	NA	NA	NA	NA	NA	NA	NA	NA	NA	NA	NA	NA	NA	NA	NA	NA	NA	NA	NA	NA	NA	NA	NA	NA	NA	NA	NA
O60427	407	FADS1	FADS1_HUMAN Acyl-CoA (8-3)-desaturase OS=Homo sapiens OX=9606 GN=FADS1 PE=1 SV=3	VAPLVQSLC(BTD[C])AK|	NA	NA	NA	NA	NA	NA	NA	NA	NA	NA	NA	1.16	NA	NA	NA	0.85	0.8	NA	0.81	NA	NA	NA	NA	0.87	NA	1	NA	NA	NA	NA	NA	NA	NA	NA	NA	NA	NA	NA	NA	NA	NA	NA	NA	NA	NA
O60427	31	FADS1	FADS1_HUMAN Acyl-CoA (8-3)-desaturase OS=Homo sapiens OX=9606 GN=FADS1 PE=1 SV=3	|SGC(BTD[C])EER	NA	NA	NA	NA	NA	NA	NA	NA	NA	NA	NA	NA	NA	NA	NA	NA	NA	NA	NA	NA	NA	NA	NA	NA	NA	NA	NA	NA	NA	NA	NA	NA	NA	NA	NA	NA	NA	NA	NA	NA	NA	NA	NA	NA	NA
O60443	156	GSDME	GSDME_HUMAN Gasdermin-E OS=Homo sapiens OX=9606 GN=GSDME PE=1 SV=2	NEVLC(BTD[C])VLTQK|	NA	NA	NA	NA	NA	NA	NA	NA	NA	NA	NA	1.56	NA	NA	NA	1.29	0.57	NA	NA	NA	1.45	NA	NA	1	1.14	0.96	NA	NA	NA	NA	NA	NA	NA	NA	NA	NA	NA	NA	NA	NA	NA	NA	NA	NA	NA
O60469	246	DSCAM	DSCAM_HUMAN Down syndrome cell adhesion molecule OS=Homo sapiens OX=9606 GN=DSCAM PE=1 SV=2	VELPC(BTD[C])K|	NA	NA	NA	NA	NA	NA	NA	NA	NA	NA	NA	NA	NA	NA	NA	NA	NA	NA	NA	NA	NA	NA	NA	NA	NA	NA	NA	NA	NA	NA	NA	NA	1.14	NA	NA	NA	NA	NA	NA	NA	NA	NA	NA	NA	NA
O60488	221	ACSL4	ACSL4_HUMAN Long-chain-fatty-acid--CoA ligase 4 OS=Homo sapiens OX=9606 GN=ACSL4 PE=1 SV=2	|TALLDISC(BTD[C])VK	NA	2.03	NA	NA	0.62	1.52	NA	0.65	1.22	NA	NA	NA	NA	NA	NA	NA	NA	1.31	NA	NA	1.21	1.12	0.72	NA	NA	1.14	NA	NA	NA	NA	NA	NA	NA	NA	NA	NA	NA	NA	NA	NA	NA	NA	NA	NA	NA
O60488	495	ACSL4	ACSL4_HUMAN Long-chain-fatty-acid--CoA ligase 4 OS=Homo sapiens OX=9606 GN=ACSL4 PE=1 SV=2	|VGAPLICC(BTD[C])EIK	NA	NA	NA	NA	NA	NA	NA	NA	NA	NA	NA	NA	0.85	NA	NA	NA	NA	NA	NA	NA	NA	NA	NA	NA	0.91	NA	NA	NA	NA	NA	NA	NA	NA	NA	NA	NA	NA	NA	NA	NA	NA	NA	NA	NA	NA
O60488	157	ACSL4	ACSL4_HUMAN Long-chain-fatty-acid--CoA ligase 4 OS=Homo sapiens OX=9606 GN=ACSL4 PE=1 SV=2	|NTIAIFC(BTD[C])ETR	NA	NA	NA	NA	NA	NA	NA	NA	NA	NA	NA	NA	NA	NA	NA	NA	NA	NA	NA	NA	NA	1.22	NA	NA	NA	NA	NA	NA	NA	NA	NA	NA	NA	NA	NA	NA	NA	NA	NA	NA	NA	NA	NA	NA	NA
O60502	166	OGA	OGA_HUMAN Protein O-GlcNAcase OS=Homo sapiens OX=9606 GN=OGA PE=1 SV=2	|KLDQVSQFGC(BTD[C])R	NA	NA	NA	NA	NA	NA	NA	NA	0.96	NA	NA	1.66	NA	NA	NA	NA	0.81	NA	NA	NA	0.89	2.23	NA	NA	NA	1.21	NA	NA	NA	NA	NA	NA	NA	NA	NA	NA	NA	NA	NA	NA	NA	NA	NA	NA	NA
O60502	631	OGA	OGA_HUMAN Protein O-GlcNAcase OS=Homo sapiens OX=9606 GN=OGA PE=1 SV=2	LSNC(BTD[C])ANR|	NA	NA	NA	NA	NA	NA	NA	0.41	NA	NA	NA	0.73	NA	NA	NA	NA	0.58	NA	NA	1.24	NA	NA	NA	NA	0.55	0.93	NA	NA	NA	NA	NA	NA	NA	NA	NA	NA	NA	NA	NA	NA	NA	NA	NA	NA	NA
O60502	596	OGA	OGA_HUMAN Protein O-GlcNAcase OS=Homo sapiens OX=9606 GN=OGA PE=1 SV=2	ANSSVVSVNC(BTD[C])K|	NA	NA	NA	NA	NA	NA	NA	NA	NA	NA	NA	1.19	NA	NA	NA	1.2	NA	0.92	NA	NA	1.18	NA	NA	NA	0.83	1.16	0.95	NA	NA	NA	NA	NA	NA	NA	NA	1.08	NA	NA	NA	NA	NA	NA	NA	NA	NA
O60502	896	OGA	OGA_HUMAN Protein O-GlcNAcase OS=Homo sapiens OX=9606 GN=OGA PE=1 SV=2	|LGC(BTD[C])FEIAK	NA	NA	NA	NA	NA	NA	NA	NA	NA	NA	NA	NA	NA	NA	NA	NA	NA	NA	NA	NA	1.57	NA	NA	1.03	NA	NA	NA	NA	NA	NA	NA	NA	NA	NA	NA	NA	NA	NA	NA	NA	NA	NA	NA	NA	NA
O60502	878	OGA	OGA_HUMAN Protein O-GlcNAcase OS=Homo sapiens OX=9606 GN=OGA PE=1 SV=2	GAFC(BTD[C])EVRPDDKR|	NA	NA	0.75	NA	NA	NA	NA	NA	NA	NA	NA	0.89	NA	NA	NA	NA	NA	NA	NA	NA	NA	NA	NA	0.94	0.79	0.72	NA	NA	NA	NA	NA	NA	NA	NA	NA	NA	0.94	NA	NA	NA	NA	NA	NA	NA	NA
O60504	482	SORBS3	VINEX_HUMAN Vinexin OS=Homo sapiens OX=9606 GN=SORBS3 PE=1 SV=2	|GEHIC(BTD[C])LIR	NA	NA	NA	NA	NA	NA	NA	NA	NA	NA	NA	NA	NA	NA	NA	NA	NA	NA	NA	NA	NA	NA	NA	NA	NA	NA	NA	NA	NA	NA	NA	NA	NA	NA	NA	NA	NA	NA	NA	NA	NA	NA	NA	NA	NA
O60504	521	SORBS3	VINEX_HUMAN Vinexin OS=Homo sapiens OX=9606 GN=SORBS3 PE=1 SV=2	|LRLC(BTD[C])DDGPQLPTSPR	NA	NA	NA	NA	NA	NA	NA	NA	NA	NA	NA	NA	NA	NA	NA	NA	NA	NA	NA	NA	NA	NA	NA	NA	NA	NA	NA	NA	NA	NA	NA	NA	NA	NA	NA	NA	NA	NA	NA	NA	NA	NA	NA	NA	NA
O60506	96	SYNCRIP	HNRPQ_HUMAN Heterogeneous nuclear ribonucleoprotein Q OS=Homo sapiens OX=9606 GN=SYNCRIP PE=1 SV=2	|SAFLC(BTD[C])GVMK	NA	NA	NA	NA	NA	NA	NA	NA	NA	NA	NA	NA	NA	NA	NA	NA	NA	NA	NA	0.95	NA	NA	NA	NA	NA	NA	NA	NA	NA	NA	NA	NA	NA	NA	NA	NA	NA	NA	NA	NA	NA	NA	NA	NA	NA
O60508	378	CDC40	PRP17_HUMAN Pre-mRNA-processing factor 17 OS=Homo sapiens OX=9606 GN=CDC40 PE=1 SV=1	KVPYC(BTD[C])VK|	NA	NA	0.7	NA	NA	NA	NA	NA	NA	NA	NA	0.91	NA	NA	NA	0.97	0.5	1	NA	NA	NA	2.25	NA	NA	0.98	0.9	NA	NA	NA	NA	NA	NA	NA	NA	NA	NA	NA	NA	NA	NA	NA	NA	NA	NA	NA
O60513	118	B4GALT4	B4GT4_HUMAN Beta-1,4-galactosyltransferase 4 OS=Homo sapiens OX=9606 GN=B4GALT4 PE=1 SV=1	YRPQEC(BTD[C])K|	NA	NA	NA	NA	NA	NA	NA	NA	NA	NA	NA	NA	NA	NA	NA	NA	NA	0.67	NA	NA	NA	NA	NA	NA	NA	0.8	NA	NA	NA	NA	NA	NA	NA	NA	NA	NA	NA	NA	NA	NA	NA	NA	NA	NA	NA
O60518	356	RANBP6	RNBP6_HUMAN Ran-binding protein 6 OS=Homo sapiens OX=9606 GN=RANBP6 PE=1 SV=2	LAC(BTD[C])GLGGK|	NA	NA	NA	NA	NA	NA	NA	NA	NA	NA	NA	NA	NA	NA	NA	NA	NA	NA	NA	0.74	NA	NA	NA	NA	NA	NA	NA	NA	NA	NA	NA	NA	NA	NA	NA	NA	NA	NA	NA	NA	NA	NA	NA	NA	NA
O60547	92	GMDS	GMDS_HUMAN GDP-mannose 4,6 dehydratase OS=Homo sapiens OX=9606 GN=GMDS PE=1 SV=1	LHYGDLTDSTC(BTD[C])LVK|	NA	NA	NA	NA	NA	NA	NA	NA	NA	NA	NA	NA	NA	NA	1.37	NA	NA	NA	NA	NA	NA	NA	NA	NA	NA	NA	NA	NA	NA	NA	NA	NA	NA	NA	NA	NA	NA	NA	NA	NA	NA	NA	NA	NA	NA
O60547	142	GMDS	GMDS_HUMAN GDP-mannose 4,6 dehydratase OS=Homo sapiens OX=9606 GN=GMDS PE=1 SV=1	TC(BTD[C])GLINSVK|	NA	NA	NA	NA	NA	NA	NA	NA	NA	NA	NA	NA	NA	NA	NA	NA	NA	NA	NA	NA	NA	NA	NA	NA	NA	1.27	NA	NA	NA	NA	NA	NA	NA	NA	NA	NA	NA	NA	NA	NA	NA	NA	NA	NA	NA
O60551	296	NMT2	NMT2_HUMAN Glycylpeptide N-tetradecanoyltransferase 2 OS=Homo sapiens OX=9606 GN=NMT2 PE=1 SV=1	PIATC(BTD[C])R|	NA	2.38	0.9	NA	NA	0.96	0.4	NA	1.02	NA	NA	NA	NA	NA	NA	0.92	NA	NA	NA	NA	0.96	2.66	NA	NA	0.93	1	1.14	NA	NA	NA	NA	NA	1.07	NA	NA	0.47	NA	NA	NA	NA	NA	NA	NA	NA	NA
O60563	111	CCNT1	CCNT1_HUMAN Cyclin-T1 OS=Homo sapiens OX=9606 GN=CCNT1 PE=1 SV=1	VAHTC(BTD[C])LHPQESLPDTR|	NA	NA	NA	NA	NA	1.55	NA	0.97	NA	NA	NA	NA	NA	NA	NA	NA	NA	NA	NA	NA	NA	NA	NA	NA	NA	NA	1.64	NA	NA	NA	NA	NA	NA	NA	NA	NA	NA	NA	NA	NA	NA	NA	NA	NA	NA
O60568	691	PLOD3	PLOD3_HUMAN Multifunctional procollagen lysine hydroxylase and glycosyltransferase LH3 OS=Homo sapiens OX=9606 GN=PLOD3 PE=1 SV=1	GLDYEGGGC(BTD[C])R|	NA	NA	NA	NA	NA	NA	NA	NA	NA	NA	NA	NA	NA	NA	NA	NA	NA	NA	NA	NA	1.38	NA	NA	NA	1.13	NA	NA	3.43	NA	NA	NA	NA	NA	NA	NA	NA	NA	NA	NA	NA	NA	0.71	NA	NA	NA
O60568	698	PLOD3	PLOD3_HUMAN Multifunctional procollagen lysine hydroxylase and glycosyltransferase LH3 OS=Homo sapiens OX=9606 GN=PLOD3 PE=1 SV=1	|YDC(BTD[C])VISSPR	NA	NA	NA	NA	NA	NA	NA	NA	NA	NA	NA	NA	NA	NA	NA	1.04	NA	NA	NA	NA	0.88	1.32	NA	0.72	0.69	NA	NA	NA	NA	NA	NA	NA	NA	NA	NA	NA	NA	NA	NA	NA	NA	NA	NA	NA	NA
O60610	454	DIAPH1	DIAP1_HUMAN Protein diaphanous homolog 1 OS=Homo sapiens OX=9606 GN=DIAPH1 PE=1 SV=2	NGADPDFKC(BTD[C])R|NGADPDFKC(BTD[C])R	NA	2.54	0.95	NA	NA	NA	NA	NA	NA	NA	NA	1.12	NA	NA	NA	0.91	0.76	NA	NA	NA	1.61	NA	NA	1.07	1	1.21	NA	NA	NA	NA	NA	NA	NA	NA	NA	NA	NA	NA	NA	NA	NA	NA	NA	NA	NA
O60610	220	DIAPH1	DIAP1_HUMAN Protein diaphanous homolog 1 OS=Homo sapiens OX=9606 GN=DIAPH1 PE=1 SV=2	|NKHEIIRC(BTD[C])LK	NA	NA	NA	NA	NA	NA	NA	NA	NA	NA	NA	NA	NA	NA	NA	NA	NA	NA	NA	NA	NA	NA	NA	NA	NA	NA	NA	NA	NA	NA	NA	NA	NA	NA	NA	NA	NA	NA	NA	NA	NA	NA	NA	NA	NA
O60637	4	TSPAN3	TSN3_HUMAN Tetraspanin-3 OS=Homo sapiens OX=9606 GN=TSPAN3 PE=2 SV=1	|GQC(BTD[C])GITSSK	NA	NA	NA	NA	NA	NA	NA	NA	NA	NA	NA	NA	NA	NA	NA	NA	NA	NA	NA	NA	NA	NA	NA	NA	NA	NA	NA	NA	NA	NA	NA	NA	NA	NA	NA	NA	NA	NA	NA	NA	NA	1.71	NA	NA	1.78
O60664	60	PLIN3	PLIN3_HUMAN Perilipin-3 OS=Homo sapiens OX=9606 GN=PLIN3 PE=1 SV=3	|TVC(BTD[C])DAAEK	0.59	3.23	NA	0.52	NA	1.28	NA	0.81	0.93	0.62	0.75	1.15	0.99	NA	0.97	0.82	NA	NA	0.7	0.44	NA	2.57	0.8	0.9	0.79	1	NA	2.43	NA	NA	NA	NA	NA	0.78	NA	NA	0.39	NA	0.82	0.83	NA	0.99	NA	0.89	0.68
O60671	239	RAD1	RAD1_HUMAN Cell cycle checkpoint protein RAD1 OS=Homo sapiens OX=9606 GN=RAD1 PE=1 SV=1	ALVLSC(BTD[C])K|	NA	NA	NA	NA	NA	NA	NA	NA	NA	NA	NA	NA	NA	NA	NA	NA	0.98	NA	NA	NA	NA	NA	NA	1.2	NA	NA	NA	NA	NA	NA	NA	NA	NA	NA	NA	NA	NA	NA	NA	NA	NA	NA	NA	NA	NA
O60678	67	PRMT3	ANM3_HUMAN Protein arginine N-methyltransferase 3 OS=Homo sapiens OX=9606 GN=PRMT3 PE=1 SV=4	LFTSAEETFSHC(BTD[C])K|	NA	NA	NA	NA	NA	NA	NA	NA	NA	NA	NA	NA	NA	NA	NA	NA	NA	NA	NA	NA	NA	NA	NA	NA	NA	NA	NA	NA	NA	NA	NA	NA	NA	NA	NA	NA	NA	NA	NA	NA	NA	NA	NA	NA	NA
O60678	417	PRMT3	ANM3_HUMAN Protein arginine N-methyltransferase 3 OS=Homo sapiens OX=9606 GN=PRMT3 PE=1 SV=4	TLISEPC(BTD[C])GIK|	NA	NA	1.16	NA	NA	1.4	NA	NA	0.99	NA	NA	1.07	NA	NA	NA	1.07	0.6	1.22	0.87	NA	1.09	NA	NA	0.98	0.96	NA	2.47	NA	NA	NA	NA	NA	NA	NA	NA	NA	NA	NA	NA	NA	NA	NA	NA	NA	NA
O60684	253	KPNA6	IMA7_HUMAN Importin subunit alpha-7 OS=Homo sapiens OX=9606 GN=KPNA6 PE=1 SV=1	VSPC(BTD[C])LPVLSR|	0.67	2.27	0.8	1.09	0.56	1.05	0.85	0.66	0.95	0.62	0.59	0.97	0.98	0.89	1.15	0.8	0.65	0.91	0.73	0.62	0.96	2.11	0.62	0.83	0.74	NA	1.71	3.21	1.51	NA	NA	1.65	1.07	0.99	1.12	NA	0.8	0.59	1	0.72	0.53	0.62	1.83	NA	NA
O60684	296	KPNA6	IMA7_HUMAN Importin subunit alpha-7 OS=Homo sapiens OX=9606 GN=KPNA6 PE=1 SV=1	IQAVIDSGVC(BTD[C])R|	NA	NA	1.18	0.58	0.67	1.43	NA	0.83	1.38	NA	0.8	1.21	0.9	NA	NA	1.13	0.62	NA	0.7	NA	1.53	2.44	0.95	1.03	0.91	1.13	3	NA	NA	NA	NA	1.64	1.79	NA	NA	0.57	2.34	NA	NA	NA	NA	NA	NA	NA	NA
O60701	276	UGDH	UGDH_HUMAN UDP-glucose 6-dehydrogenase OS=Homo sapiens OX=9606 GN=UGDH PE=1 SV=1	ASVGFGGSC(BTD[C])FQK|	0.45	NA	NA	0.87	0.5	NA	0.66	0.53	NA	0.56	0.86	0.97	2.61	NA	NA	1.36	0.92	1.13	1.2	1.16	0.99	2.25	0.67	0.93	0.99	0.83	NA	NA	1.66	0.74	0.53	1.17	1.62	1.53	NA	0.29	0.28	NA	1.19	NA	NA	NA	NA	NA	NA
O60701	64	UGDH	UGDH_HUMAN UDP-glucose 6-dehydrogenase OS=Homo sapiens OX=9606 GN=UGDH PE=1 SV=1	|EVVESC(BTD[C])R	0.52	2.96	1.19	0.46	NA	1.24	NA	0.93	0.95	NA	0.65	1.47	1.07	0.72	0.98	1.2	0.83	1.6	0.85	NA	0.99	1.82	NA	1.01	1.02	0.9	NA	NA	NA	NA	NA	1.22	1.14	1.25	1.37	NA	0.73	0.9	1.08	0.62	NA	0.71	1.18	0.78	1.19
O60701	112	UGDH	UGDH_HUMAN UDP-glucose 6-dehydrogenase OS=Homo sapiens OX=9606 GN=UGDH PE=1 SV=1	|YIEAC(BTD[C])AR	1.23	NA	1.1	0.41	NA	NA	0.88	0.92	1.1	NA	NA	1	NA	1.03	NA	0.96	1.05	0.96	0.88	0.46	NA	NA	1.07	NA	NA	NA	1.64	NA	NA	NA	NA	1.6	1.04	1.08	1.13	NA	1.05	0.66	1.13	0.72	0.6	NA	0.7	0.84	0.61
O60716	429	CTNND1	CTND1_HUMAN Catenin delta-1 OS=Homo sapiens OX=9606 GN=CTNND1 PE=1 SV=1	|EVHLGAC(BTD[C])GALK	NA	NA	1.15	NA	0.52	1.13	NA	0.44	1.04	NA	NA	0.74	NA	1.11	1.26	NA	NA	1.11	NA	NA	NA	1.22	0.52	0.84	NA	NA	1.63	NA	NA	NA	NA	NA	NA	NA	1.04	0.86	0.94	0.85	NA	NA	NA	NA	NA	0.94	NA
O60716	618	CTNND1	CTND1_HUMAN Catenin delta-1 OS=Homo sapiens OX=9606 GN=CTNND1 PE=1 SV=1	YQEAAPNVANNTGPHAASC(BTD[C])FGAK|	NA	NA	NA	NA	0.48	NA	NA	NA	NA	NA	NA	NA	NA	NA	NA	NA	NA	NA	NA	NA	NA	NA	NA	0.81	0.99	NA	NA	NA	NA	0.87	NA	NA	NA	1.1	NA	NA	NA	NA	NA	NA	NA	NA	NA	NA	NA
O60716	516	CTNND1	CTND1_HUMAN Catenin delta-1 OS=Homo sapiens OX=9606 GN=CTNND1 PE=1 SV=1	EPNEDC(BTD[C])KPR|	NA	NA	1	NA	NA	NA	NA	NA	NA	NA	NA	1.09	NA	NA	NA	0.83	NA	NA	NA	NA	0.91	NA	NA	0.81	NA	0.91	0.89	NA	NA	NA	NA	NA	NA	0.68	NA	1.27	0.83	NA	NA	NA	0.85	NA	NA	NA	NA
O60716	450	CTNND1	CTND1_HUMAN Catenin delta-1 OS=Homo sapiens OX=9606 GN=CTNND1 PE=1 SV=1	|NC(BTD[C])DGVPALVR	NA	NA	0.71	NA	NA	NA	NA	NA	NA	NA	NA	0.89	NA	NA	1.08	NA	NA	NA	NA	NA	NA	NA	NA	1.5	1.12	NA	NA	NA	NA	NA	NA	NA	NA	NA	NA	NA	NA	NA	NA	NA	NA	NA	NA	NA	NA
O60716	579	CTNND1	CTND1_HUMAN Catenin delta-1 OS=Homo sapiens OX=9606 GN=CTNND1 PE=1 SV=1	LVENC(BTD[C])VCLLR|	NA	NA	NA	NA	NA	NA	NA	NA	NA	NA	NA	NA	NA	NA	NA	NA	NA	NA	NA	NA	NA	NA	NA	NA	NA	NA	NA	NA	NA	NA	NA	NA	NA	NA	NA	NA	NA	NA	NA	NA	NA	NA	NA	NA	NA
O60749	413	SNX2	SNX2_HUMAN Sorting nexin-2 OS=Homo sapiens OX=9606 GN=SNX2 PE=1 SV=2	MKC(BTD[C])WQK|	NA	NA	0.99	NA	NA	1.14	NA	NA	0.9	NA	NA	1.02	NA	NA	NA	NA	0.89	1.14	NA	NA	0.57	1.74	NA	1.14	0.85	NA	NA	NA	NA	NA	NA	NA	NA	NA	NA	NA	NA	NA	NA	NA	NA	NA	NA	NA	NA
O60762	202	DPM1	DPM1_HUMAN Dolichol-phosphate mannosyltransferase subunit 1 OS=Homo sapiens OX=9606 GN=DPM1 PE=1 SV=1	LIEKC(BTD[C])VSK|	NA	2.25	0.63	NA	NA	NA	NA	0.29	0.98	NA	NA	NA	NA	NA	1.39	0.98	0.37	0.8	NA	NA	0.68	NA	NA	0.61	0.53	0.81	1.6	NA	NA	0.35	0.3	1.62	NA	NA	1.2	0.19	0.58	NA	NA	0.51	NA	NA	NA	0.55	NA
O60763	678	USO1	USO1_HUMAN General vesicular transport factor p115 OS=Homo sapiens OX=9606 GN=USO1 PE=1 SV=2	QQVSTLKC(BTD[C])QNEQLQTAVTQQVSQIQQHK|	NA	NA	NA	NA	NA	NA	NA	NA	NA	0.81	NA	NA	NA	1.06	1.76	NA	NA	NA	NA	NA	NA	NA	NA	NA	NA	NA	NA	NA	NA	1.04	0.93	2.34	1.77	1.01	NA	1.01	1.09	NA	1.28	NA	NA	NA	NA	NA	NA
O60763	303	USO1	USO1_HUMAN General vesicular transport factor p115 OS=Homo sapiens OX=9606 GN=USO1 PE=1 SV=2	|VLVSPTNPPGATSSC(BTD[C])QK	NA	NA	NA	NA	0.29	NA	0.4	NA	NA	NA	NA	0.58	NA	NA	NA	0.73	NA	0.58	NA	NA	0.5	0.71	NA	NA	NA	0.32	0.66	NA	NA	NA	NA	1.28	1.02	NA	NA	NA	NA	NA	NA	NA	NA	NA	NA	NA	NA
O60763	27	USO1	USO1_HUMAN General vesicular transport factor p115 OS=Homo sapiens OX=9606 GN=USO1 PE=1 SV=2	GVMGGQSAGPQHTEAETIQKLC(BTD[C])DR|	NA	NA	NA	NA	NA	NA	NA	NA	NA	NA	NA	NA	NA	NA	NA	NA	NA	NA	NA	NA	NA	NA	NA	NA	NA	NA	NA	NA	NA	NA	0.65	NA	NA	NA	NA	NA	NA	NA	NA	NA	NA	NA	NA	NA	NA
O60779	161	SLC19A2	S19A2_HUMAN Thiamine transporter 1 OS=Homo sapiens OX=9606 GN=SLC19A2 PE=1 SV=2	VTSYC(BTD[C])R|	NA	NA	NA	NA	NA	NA	NA	NA	NA	NA	NA	NA	NA	NA	NA	1.03	NA	NA	NA	NA	1.97	NA	NA	NA	0.9	NA	NA	NA	NA	NA	NA	NA	NA	NA	NA	NA	NA	NA	NA	NA	NA	NA	NA	NA	NA
O60783	83	MRPS14	RT14_HUMAN 28S ribosomal protein S14, mitochondrial OS=Homo sapiens OX=9606 GN=MRPS14 PE=1 SV=1	|DSC(BTD[C])PVR	NA	NA	NA	NA	NA	NA	NA	NA	NA	NA	NA	0.89	NA	NA	NA	0.82	NA	0.76	NA	NA	1.13	3.44	NA	1.4	1.01	NA	1.46	NA	NA	NA	NA	NA	NA	NA	NA	NA	NA	1.03	0.87	1.13	NA	0.96	NA	NA	0.95
O60825	105	PFKFB2	F262_HUMAN 6-phosphofructo-2-kinase/fructose-2,6-bisphosphatase 2 OS=Homo sapiens OX=9606 GN=PFKFB2 PE=1 SV=2	KQC(BTD[C])ALVALEDVK|	NA	NA	NA	NA	0.25	NA	NA	NA	NA	NA	NA	NA	NA	NA	1.28	NA	NA	NA	NA	NA	NA	NA	NA	NA	NA	NA	NA	NA	NA	NA	NA	NA	NA	NA	NA	NA	NA	NA	NA	NA	NA	NA	NA	NA	NA
O60826	441	CCDC22	CCD22_HUMAN Coiled-coil domain-containing protein 22 OS=Homo sapiens OX=9606 GN=CCDC22 PE=1 SV=1	|KLQDC(BTD[C])R	NA	NA	NA	NA	NA	NA	NA	NA	NA	NA	NA	NA	NA	NA	NA	NA	NA	NA	NA	NA	NA	NA	NA	NA	NA	NA	NA	NA	NA	NA	NA	NA	NA	NA	0.66	NA	NA	NA	NA	NA	NA	NA	NA	NA	NA
O60832	74	DKC1	DKC1_HUMAN H/ACA ribonucleoprotein complex subunit DKC1 OS=Homo sapiens OX=9606 GN=DKC1 PE=1 SV=3	TTHYTPLAC(BTD[C])GSNPLK|	NA	2.15	0.95	0.45	0.43	1.17	0.5	0.41	1.02	0.35	0.72	1.02	0.68	0.96	0.77	0.96	0.68	1.06	0.61	NA	0.88	1.81	0.61	0.92	0.81	0.9	1.76	0.35	3.06	NA	1.35	0.94	1.07	NA	1.41	0.81	0.76	0.39	NA	0.49	0.45	0.44	0.65	0.68	0.66
O60832	310	DKC1	DKC1_HUMAN H/ACA ribonucleoprotein complex subunit DKC1 OS=Homo sapiens OX=9606 GN=DKC1 PE=1 SV=3	|DSAVNAIC(BTD[C])YGAK	NA	NA	NA	NA	NA	NA	NA	NA	NA	NA	NA	1.25	NA	NA	NA	1.17	0.77	NA	NA	NA	1.09	NA	NA	NA	NA	NA	NA	NA	NA	NA	NA	NA	NA	NA	NA	NA	NA	NA	NA	NA	NA	NA	NA	NA	NA
O60841	1158	EIF5B	IF2P_HUMAN Eukaryotic translation initiation factor 5B OS=Homo sapiens OX=9606 GN=EIF5B PE=1 SV=4	KGQEVC(BTD[C])VK|KGQEVC(BTD[C])VK	0.4	NA	0.75	0.47	0.43	1.02	0.55	0.51	0.96	0.83	0.95	NA	0.84	1.11	1.4	1.02	0.57	0.9	0.89	0.55	0.97	NA	0.46	0.76	0.61	0.84	1.23	4.09	4.07	1.03	1.29	1.75	1.28	1.04	1.33	0.93	0.8	0.94	1.14	0.78	0.67	NA	1.43	0.84	0.96
O60841	749	EIF5B	IF2P_HUMAN Eukaryotic translation initiation factor 5B OS=Homo sapiens OX=9606 GN=EIF5B PE=1 SV=4	C(BTD[C])PFIVALNK|	NA	NA	NA	NA	0.53	NA	0.97	0.82	NA	0.58	NA	NA	NA	NA	NA	NA	NA	NA	NA	NA	NA	NA	NA	NA	NA	NA	NA	NA	1.82	0.41	0.48	NA	NA	1.05	1.68	0.25	NA	0.44	NA	0.87	NA	NA	NA	0.65	0.32
O60841	635	EIF5B	IF2P_HUMAN Eukaryotic translation initiation factor 5B OS=Homo sapiens OX=9606 GN=EIF5B PE=1 SV=4	APIIC(BTD[C])VLGHVDTGK|	NA	NA	1.14	0.39	0.68	0.92	0.81	0.67	1.28	0.52	0.71	1.12	1.46	NA	1.58	1.1	NA	NA	0.78	NA	1.26	2.1	NA	0.92	0.95	1.13	1.51	NA	1.13	NA	NA	NA	NA	NA	1.52	0.45	NA	0.9	NA	NA	0.29	0.57	0.36	0.56	NA
O60841	853	EIF5B	IF2P_HUMAN Eukaryotic translation initiation factor 5B OS=Homo sapiens OX=9606 GN=EIF5B PE=1 SV=4	|LAHC(BTD[C])EELR	0.62	2.98	1.12	0.57	0.61	2.15	0.88	0.77	1.36	NA	0.9	1.59	NA	NA	NA	1.46	0.8	1.47	NA	NA	1.25	1.72	0.82	1.07	1.03	1.13	2.44	NA	1.71	NA	NA	NA	NA	NA	NA	NA	0.51	NA	NA	NA	NA	NA	NA	0.89	NA
O60841	1126	EIF5B	IF2P_HUMAN Eukaryotic translation initiation factor 5B OS=Homo sapiens OX=9606 GN=EIF5B PE=1 SV=4	|QGTPMC(BTD[C])VPSK	NA	2.53	0.97	0.63	0.58	1.54	0.64	0.48	1.03	NA	0.9	0.93	0.76	NA	NA	0.9	0.64	1.12	0.65	0.62	1.02	2.26	0.58	1.01	0.89	1.08	1.04	NA	1.79	1.06	NA	1.76	1.02	NA	NA	0.5	0.91	NA	NA	NA	NA	NA	NA	NA	NA
O60841	1092	EIF5B	IF2P_HUMAN Eukaryotic translation initiation factor 5B OS=Homo sapiens OX=9606 GN=EIF5B PE=1 SV=4	|HIAVFPC(BTD[C])K	NA	2.01	NA	0.69	NA	NA	NA	NA	NA	NA	NA	0.85	NA	NA	NA	0.99	0.6	0.07	NA	NA	0.91	NA	NA	0.83	0.85	1.12	NA	NA	NA	NA	NA	NA	NA	NA	NA	NA	0.66	NA	NA	NA	NA	NA	NA	NA	NA
O60870	212	KIN	KIN17_HUMAN DNA/RNA-binding protein KIN17 OS=Homo sapiens OX=9606 GN=KIN PE=1 SV=2	GAC(BTD[C])SSSGATSSK|GAC(BTD[C])SSSGATSSK	NA	NA	0.62	0.62	NA	NA	NA	NA	NA	NA	NA	0.41	NA	NA	1.02	0.97	0.42	0.52	0.96	NA	0.44	NA	NA	NA	0.45	0.41	NA	NA	NA	NA	NA	NA	1.24	1	1.12	NA	NA	0.97	NA	NA	NA	0.94	NA	1.53	1.05
O60879	182	DIAPH2	DIAP2_HUMAN Protein diaphanous homolog 2 OS=Homo sapiens OX=9606 GN=DIAPH2 PE=1 SV=1	LLNC(BTD[C])LESLR|	NA	NA	NA	NA	NA	NA	NA	NA	NA	NA	NA	NA	NA	NA	NA	NA	0.6	NA	NA	NA	1.07	NA	NA	1.12	NA	NA	NA	NA	NA	NA	NA	NA	NA	NA	NA	NA	NA	NA	NA	NA	NA	NA	NA	NA	NA
O60879	862	DIAPH2	DIAP2_HUMAN Protein diaphanous homolog 2 OS=Homo sapiens OX=9606 GN=DIAPH2 PE=1 SV=1	INFLC(BTD[C])K|	NA	1.58	NA	NA	NA	NA	NA	NA	NA	NA	NA	NA	NA	NA	NA	NA	NA	NA	NA	NA	NA	NA	NA	NA	NA	NA	NA	NA	NA	NA	NA	NA	NA	NA	NA	NA	NA	NA	NA	NA	NA	NA	NA	NA	NA
O60884	308	DNAJA2	DNJA2_HUMAN DnaJ homolog subfamily A member 2 OS=Homo sapiens OX=9606 GN=DNAJA2 PE=1 SV=1	VIEPGC(BTD[C])VR|	0.57	2.73	0.8	0.44	0.55	1.15	0.66	0.69	0.99	0.5	1.15	0.86	0.84	NA	0.94	1.04	0.48	0.97	0.9	0.55	0.91	1.38	0.74	0.87	0.8	1.02	1.48	0.22	NA	NA	NA	1.88	1.14	NA	NA	NA	NA	NA	1	0.31	0.5	0.38	0.67	0.59	0.52
O60884	146	DNAJA2	DNJA2_HUMAN DnaJ homolog subfamily A member 2 OS=Homo sapiens OX=9606 GN=DNAJA2 PE=1 SV=1	NVLCSAC(BTD[C])SGQGGK|NVLCSAC(BTD[C])SGQGGK	NA	2.94	NA	0.47	NA	NA	NA	NA	1.18	NA	0.91	1.1	NA	NA	NA	1.07	0.7	1.01	1.13	NA	0.78	2.06	NA	0.85	NA	0.77	1.61	NA	NA	NA	NA	NA	NA	NA	NA	NA	NA	NA	NA	NA	NA	NA	NA	NA	NA
O60884	143	DNAJA2	DNJA2_HUMAN DnaJ homolog subfamily A member 2 OS=Homo sapiens OX=9606 GN=DNAJA2 PE=1 SV=1	NVLC(BTD[C])SACSGQGGK|	NA	2.25	NA	0.53	NA	1.32	NA	NA	NA	NA	NA	0.68	1.13	NA	NA	NA	0.53	1.13	NA	NA	0.88	NA	NA	NA	0.8	0.78	1.7	NA	NA	NA	NA	NA	NA	NA	NA	NA	NA	NA	NA	NA	NA	NA	NA	NA	NA
O60885	674	BRD4	BRD4_HUMAN Bromodomain-containing protein 4 OS=Homo sapiens OX=9606 GN=BRD4 PE=1 SV=2	YVTSC(BTD[C])LR|YVTSC(BTD[C])LR	NA	1.13	1.21	0.4	NA	0.98	NA	NA	NA	NA	NA	1.24	0.73	NA	NA	0.96	0.98	0.87	NA	0.5	0.98	1.21	NA	0.9	0.92	1.11	NA	NA	NA	NA	NA	NA	NA	NA	NA	NA	NA	NA	NA	NA	NA	NA	NA	NA	NA
O60885	429	BRD4	BRD4_HUMAN Bromodomain-containing protein 4 OS=Homo sapiens OX=9606 GN=BRD4 PE=1 SV=2	LMFSNC(BTD[C])YK|	NA	NA	1.33	NA	NA	NA	NA	NA	NA	NA	NA	NA	NA	NA	NA	NA	NA	0.87	NA	NA	NA	NA	NA	NA	0.85	1.45	NA	NA	NA	NA	NA	NA	NA	NA	NA	NA	NA	NA	NA	NA	NA	NA	NA	NA	NA
O60885	356	BRD4	BRD4_HUMAN Bromodomain-containing protein 4 OS=Homo sapiens OX=9606 GN=BRD4 PE=1 SV=2	|VSEQLKC(BTD[C])CSGILK	NA	NA	NA	NA	NA	NA	NA	NA	NA	NA	NA	NA	NA	NA	NA	NA	NA	NA	NA	NA	NA	NA	NA	NA	NA	NA	NA	NA	NA	NA	NA	4.59	NA	1.02	NA	NA	NA	NA	NA	NA	NA	NA	NA	NA	NA
O60921	253	HUS1	HUS1_HUMAN Checkpoint protein HUS1 OS=Homo sapiens OX=9606 GN=HUS1 PE=1 SV=1	ALC(BTD[C])NIVNNK|	NA	NA	NA	NA	NA	NA	NA	NA	NA	NA	NA	NA	NA	NA	NA	NA	0.61	NA	NA	NA	0.78	NA	NA	0.61	0.73	0.78	0.36	NA	NA	NA	NA	NA	NA	NA	NA	NA	NA	NA	NA	NA	NA	NA	NA	NA	NA
O60930	191	RNASEH1	RNH1_HUMAN Ribonuclease H1 OS=Homo sapiens OX=9606 GN=RNASEH1 PE=1 SV=2	|AEIHAAC(BTD[C])K	NA	3.12	1.07	NA	NA	1.62	NA	NA	NA	NA	NA	NA	NA	NA	NA	NA	0.91	1.16	NA	NA	NA	NA	NA	NA	NA	1.08	NA	NA	NA	NA	NA	NA	NA	NA	NA	NA	NA	NA	NA	NA	NA	NA	NA	NA	NA
O60934	323	NBN	NBN_HUMAN Nibrin OS=Homo sapiens OX=9606 GN=NBN PE=1 SV=1	NYC(BTD[C])DPQGHPSTGLK|	NA	NA	NA	NA	NA	1.31	NA	NA	NA	NA	NA	NA	NA	NA	NA	NA	0.75	NA	NA	NA	NA	NA	NA	NA	NA	NA	NA	NA	NA	NA	NA	NA	NA	NA	NA	NA	NA	0.83	NA	NA	NA	NA	NA	0.8	0.63
O60936	73	NOL3	NOL3_HUMAN Nucleolar protein 3 OS=Homo sapiens OX=9606 GN=NOL3 PE=1 SV=2	GEAAC(BTD[C])QELLR|	NA	NA	NA	NA	NA	NA	NA	NA	NA	NA	NA	1.15	NA	NA	NA	NA	NA	NA	NA	NA	NA	NA	NA	NA	NA	NA	NA	NA	NA	NA	NA	NA	NA	NA	NA	NA	NA	NA	NA	NA	NA	NA	NA	NA	NA
O60942	419	RNGTT	MCE1_HUMAN mRNA-capping enzyme OS=Homo sapiens OX=9606 GN=RNGTT PE=1 SV=1	NKPFFDIC(BTD[C])TSR|	NA	NA	NA	NA	NA	NA	NA	NA	NA	NA	NA	0.95	NA	NA	NA	NA	NA	NA	NA	NA	NA	NA	NA	0.96	NA	NA	NA	NA	NA	NA	NA	NA	NA	NA	NA	NA	NA	NA	NA	NA	NA	NA	NA	NA	NA
O75051	1742	PLXNA2	PLXA2_HUMAN Plexin-A2 OS=Homo sapiens OX=9606 GN=PLXNA2 PE=1 SV=4	SNC(BTD[C])LPLR|SNC(BTD[C])LPLR	NA	1.43	0.6	NA	NA	0.83	NA	NA	0.71	NA	NA	0.71	NA	NA	NA	1.07	0.6	0.91	0.93	NA	0.92	1.26	NA	0.97	1.03	1	NA	NA	NA	NA	NA	NA	NA	NA	NA	NA	NA	NA	NA	NA	NA	NA	NA	NA	NA
O75051	1289	PLXNA2	PLXA2_HUMAN Plexin-A2 OS=Homo sapiens OX=9606 GN=PLXNA2 PE=1 SV=4	VALEC(BTD[C])K|VALEC(BTD[C])K	NA	1.89	1.04	NA	NA	1.38	NA	NA	1.13	NA	NA	NA	NA	NA	NA	1.39	NA	0.96	NA	0.79	NA	2.13	NA	1.24	NA	NA	NA	NA	NA	NA	NA	NA	NA	NA	NA	NA	NA	NA	NA	NA	NA	NA	NA	NA	NA
O75083	225	WDR1	WDR1_HUMAN WD repeat-containing protein 1 OS=Homo sapiens OX=9606 GN=WDR1 PE=1 SV=4	VC(BTD[C])ALGGSK|	0.55	2.09	0.98	0.4	0.42	1.38	0.79	0.67	NA	0.47	0.94	1.3	0.9	NA	1.17	1.11	NA	1	0.83	0.48	1.25	1.8	0.68	0.92	0.94	1.25	2.03	NA	0.73	1.99	1.49	NA	0.94	1.03	NA	NA	0.73	0.51	0.92	0.65	NA	NA	NA	0.79	0.71
O75083	194	WDR1	WDR1_HUMAN WD repeat-containing protein 1 OS=Homo sapiens OX=9606 GN=WDR1 PE=1 SV=4	FVNC(BTD[C])VR|FVNC(BTD[C])VR	0.87	2.54	0.98	0.43	NA	1.34	0.68	0.93	1.09	NA	0.88	1.05	NA	NA	NA	1.1	0.5	1.06	NA	NA	1.05	2.24	0.73	0.83	0.8	1.09	2.07	0.31	1.28	0.1	NA	2.43	NA	1.17	1.3	0.11	NA	0.36	NA	0.5	0.48	0.46	0.57	NA	0.6
O75083	325	WDR1	WDR1_HUMAN WD repeat-containing protein 1 OS=Homo sapiens OX=9606 GN=WDR1 PE=1 SV=4	SIQC(BTD[C])LTVHK|SIQC(BTD[C])LTVHK	0.48	1.73	1.1	0.5	0.46	NA	0.71	0.49	1.13	NA	NA	1.25	1.72	1.14	1.71	NA	0.54	0.96	1.03	0.52	1.17	1.91	0.59	0.82	0.86	0.99	3.12	3.1	1.25	NA	0.38	NA	NA	1.56	NA	0.21	0.91	NA	1.03	0.69	NA	NA	0.67	0.75	0.45
O75083	382	WDR1	WDR1_HUMAN WD repeat-containing protein 1 OS=Homo sapiens OX=9606 GN=WDR1 PE=1 SV=4	MTVDESGQLISC(BTD[C])SMDDTVR|	NA	NA	NA	NA	0.69	NA	NA	NA	NA	NA	NA	NA	NA	NA	NA	NA	NA	NA	NA	NA	NA	NA	NA	NA	NA	NA	NA	NA	NA	NA	NA	NA	NA	NA	NA	NA	NA	NA	NA	NA	NA	NA	NA	NA	NA
O75083	438	WDR1	WDR1_HUMAN WD repeat-containing protein 1 OS=Homo sapiens OX=9606 GN=WDR1 PE=1 SV=4	KC(BTD[C])FSIDNPGYEPEVVAVHPGGDTVAIGGVDGNVR|	NA	NA	NA	NA	NA	NA	NA	NA	NA	NA	NA	NA	NA	NA	NA	NA	NA	NA	NA	NA	1.34	NA	NA	NA	NA	NA	NA	NA	NA	NA	NA	NA	NA	NA	NA	NA	NA	NA	NA	NA	NA	NA	NA	NA	NA
O75083	507	WDR1	WDR1_HUMAN WD repeat-containing protein 1 OS=Homo sapiens OX=9606 GN=WDR1 PE=1 SV=4	GPVTDVAYSHDGAFLAVC(BTD[C])DASK|	NA	NA	NA	NA	NA	NA	NA	NA	NA	NA	NA	NA	NA	NA	NA	NA	NA	NA	NA	NA	NA	NA	NA	NA	1.42	NA	NA	NA	NA	NA	NA	NA	NA	NA	NA	0.63	NA	NA	NA	NA	NA	NA	NA	NA	NA
O75083	39	WDR1	WDR1_HUMAN WD repeat-containing protein 1 OS=Homo sapiens OX=9606 GN=WDR1 PE=1 SV=4	|GNNFLYTNGKC(BTD[C])VILR	NA	NA	NA	NA	NA	NA	NA	NA	NA	NA	NA	NA	NA	NA	NA	NA	NA	NA	NA	NA	NA	NA	NA	NA	NA	NA	NA	NA	NA	NA	NA	NA	NA	NA	NA	NA	NA	NA	NA	NA	NA	NA	NA	NA	NA
O75084	94	FZD7	FZD7_HUMAN Frizzled-7 OS=Homo sapiens OX=9606 GN=FZD7 PE=1 SV=2	|VQC(BTD[C])SPELR	NA	NA	0.84	NA	NA	NA	NA	NA	NA	NA	NA	NA	NA	NA	NA	NA	0.72	NA	NA	NA	NA	NA	NA	NA	0.52	0.56	NA	NA	NA	NA	NA	NA	NA	NA	NA	NA	NA	1.62	NA	NA	NA	NA	NA	NA	NA
O75116	649	ROCK2	ROCK2_HUMAN Rho-associated protein kinase 2 OS=Homo sapiens OX=9606 GN=ROCK2 PE=1 SV=4	IC(BTD[C])GLEEDLK|	NA	NA	1.15	NA	0.98	NA	1.37	NA	NA	0.72	NA	0.99	NA	NA	0.95	0.84	NA	0.51	NA	NA	0.98	0.57	0.96	NA	0.3	NA	NA	NA	NA	NA	NA	NA	NA	0.87	NA	NA	0.85	NA	0.93	NA	NA	0.86	NA	0.88	0.44
O75116	607	ROCK2	ROCK2_HUMAN Rho-associated protein kinase 2 OS=Homo sapiens OX=9606 GN=ROCK2 PE=1 SV=4	|DLQDKNC(BTD[C])LLETAK	0.59	2.97	0.86	0.69	0.49	NA	0.58	0.51	0.92	0.67	NA	NA	0.6	0.87	NA	NA	NA	0.86	NA	NA	0.98	2.02	0.78	NA	0.94	NA	1.02	NA	3.07	0.88	1.03	0.82	1.43	NA	1.26	0.8	1.04	0.83	0.98	0.79	0.59	0.66	1.39	0.98	NA
O75116	1257	ROCK2	ROCK2_HUMAN Rho-associated protein kinase 2 OS=Homo sapiens OX=9606 GN=ROCK2 PE=1 SV=4	SNYIC(BTD[C])HK|SNYIC(BTD[C])HK	0.39	2.56	0.9	NA	0.4	1.39	0.89	NA	1.38	0.63	NA	0.86	NA	NA	NA	0.89	0.81	0.96	NA	NA	1.05	2.67	0.75	1.06	0.93	0.98	1.32	NA	3.12	1.98	1.45	NA	NA	NA	NA	1.27	0.3	NA	NA	NA	NA	NA	NA	NA	NA
O75116	804	ROCK2	ROCK2_HUMAN Rho-associated protein kinase 2 OS=Homo sapiens OX=9606 GN=ROCK2 PE=1 SV=4	RC(BTD[C])LTQNDLK|RC(BTD[C])LTQNDLK	0.48	3.75	0.92	1.51	0.43	NA	1.19	0.57	1.34	NA	1.08	NA	NA	NA	NA	1.5	0.88	NA	NA	NA	NA	NA	0.64	0.99	NA	0.97	1.35	NA	NA	NA	NA	NA	NA	NA	NA	NA	NA	NA	NA	NA	NA	NA	NA	0.71	0.56
O75116	1315	ROCK2	ROCK2_HUMAN Rho-associated protein kinase 2 OS=Homo sapiens OX=9606 GN=ROCK2 PE=1 SV=4	|KEEIIAPC(BTD[C])K	NA	NA	1.08	NA	NA	NA	NA	NA	1.11	NA	NA	NA	NA	NA	NA	1.34	NA	NA	NA	NA	NA	NA	NA	NA	NA	NA	0.66	NA	NA	NA	NA	NA	NA	NA	NA	NA	NA	NA	NA	NA	NA	NA	NA	NA	NA
O75116	236	ROCK2	ROCK2_HUMAN Rho-associated protein kinase 2 OS=Homo sapiens OX=9606 GN=ROCK2 PE=1 SV=4	LADFGTC(BTD[C])MK|	NA	NA	NA	NA	NA	NA	NA	NA	NA	NA	NA	NA	NA	NA	NA	NA	NA	NA	NA	NA	NA	NA	NA	NA	1.28	NA	NA	NA	NA	NA	NA	NA	NA	NA	NA	NA	NA	NA	NA	NA	NA	NA	NA	NA	NA
O75116	470	ROCK2	ROCK2_HUMAN Rho-associated protein kinase 2 OS=Homo sapiens OX=9606 GN=ROCK2 PE=1 SV=4	|EELEQKC(BTD[C])K	NA	NA	NA	NA	NA	NA	NA	NA	NA	NA	NA	NA	NA	NA	NA	NA	NA	NA	NA	NA	NA	NA	NA	NA	NA	NA	NA	NA	NA	NA	NA	NA	NA	NA	NA	NA	NA	NA	NA	NA	NA	NA	NA	NA	NA
O75122	198	CLASP2	CLAP2_HUMAN CLIP-associating protein 2 OS=Homo sapiens OX=9606 GN=CLASP2 PE=1 SV=3	|VMATSGC(BTD[C])AAIR	NA	NA	NA	NA	NA	1.25	NA	NA	1.07	NA	NA	0.72	NA	NA	NA	1.09	NA	NA	NA	NA	NA	1.83	NA	0.91	0.65	0.95	1.32	NA	NA	NA	NA	NA	NA	NA	NA	NA	NA	NA	NA	NA	NA	NA	NA	NA	NA
O75122	696	CLASP2	CLAP2_HUMAN CLIP-associating protein 2 OS=Homo sapiens OX=9606 GN=CLASP2 PE=1 SV=3	|RLC(BTD[C])EIFTR	NA	1.15	0.97	NA	NA	NA	NA	NA	1.46	NA	NA	1.56	NA	NA	NA	0.79	0.61	1.3	NA	NA	NA	1.45	NA	NA	NA	NA	NA	NA	NA	NA	NA	NA	NA	0.92	0.58	NA	NA	NA	NA	NA	NA	NA	NA	NA	NA
O75122	528	CLASP2	CLAP2_HUMAN CLIP-associating protein 2 OS=Homo sapiens OX=9606 GN=CLASP2 PE=1 SV=3	SQGC(BTD[C])SR|	NA	NA	NA	0.5	NA	1.22	NA	NA	NA	NA	NA	NA	NA	NA	NA	NA	NA	NA	NA	NA	0.7	NA	NA	NA	NA	NA	NA	NA	0.64	NA	NA	NA	NA	NA	NA	NA	NA	NA	NA	NA	NA	NA	NA	NA	NA
O75122	502	CLASP2	CLAP2_HUMAN CLIP-associating protein 2 OS=Homo sapiens OX=9606 GN=CLASP2 PE=1 SV=3	SQGC(BTD[C])SR|	NA	NA	NA	NA	NA	1.22	NA	NA	NA	NA	NA	NA	NA	NA	NA	NA	NA	NA	NA	NA	NA	NA	NA	NA	NA	NA	NA	NA	NA	NA	NA	NA	NA	NA	NA	NA	NA	NA	NA	NA	NA	NA	NA	NA	NA
O75122	221	CLASP2	CLAP2_HUMAN CLIP-associating protein 2 OS=Homo sapiens OX=9606 GN=CLASP2 PE=1 SV=3	|LIPLITSNC(BTD[C])TSK	NA	NA	NA	NA	NA	NA	NA	NA	NA	NA	NA	NA	NA	NA	NA	NA	NA	NA	NA	NA	NA	NA	NA	NA	NA	0.58	NA	NA	NA	NA	NA	NA	NA	NA	NA	NA	NA	NA	NA	NA	NA	NA	NA	NA	NA
O75131	15	CPNE3	CPNE3_HUMAN Copine-3 OS=Homo sapiens OX=9606 GN=CPNE3 PE=1 SV=1	VALNVSC(BTD[C])ANLLDK|	NA	2.78	0.88	NA	NA	NA	NA	NA	0.92	0.37	NA	0.98	NA	NA	NA	0.74	0.62	0.99	NA	NA	0.91	NA	NA	1.09	0.74	0.89	NA	0.13	NA	NA	NA	NA	NA	NA	NA	NA	NA	0.22	NA	NA	0.31	0.78	NA	0.35	NA
O75131	54	CPNE3	CPNE3_HUMAN Copine-3 OS=Homo sapiens OX=9606 GN=CPNE3 PE=1 SV=1	IKNC(BTD[C])LNPQFSK NC(BTD[C])LNPQFSK|IKNC(BTD[C])LNPQFSK	NA	2.27	0.94	0.53	NA	1.23	NA	NA	1.02	0.36	NA	0.81	NA	NA	1.58	0.8	0.73	0.86	NA	0.46	1	2.11	NA	0.78	0.92	1.06	1.32	NA	NA	0.92	NA	NA	NA	1.01	NA	NA	0.45	NA	NA	NA	NA	1.15	NA	NA	0.73
O75131	385	CPNE3	CPNE3_HUMAN Copine-3 OS=Homo sapiens OX=9606 GN=CPNE3 PE=1 SV=1	SC(BTD[C])LPQIK|SC(BTD[C])LPQIK	NA	0.6	NA	NA	NA	0.66	NA	NA	0.95	NA	0.52	0.46	0.51	NA	NA	NA	NA	NA	NA	NA	0.13	NA	NA	0.24	NA	NA	1.17	NA	1.3	0.82	NA	NA	NA	NA	NA	0.98	NA	0.57	NA	0.33	NA	NA	NA	NA	NA
O75131	249	CPNE3	CPNE3_HUMAN Copine-3 OS=Homo sapiens OX=9606 GN=CPNE3 PE=1 SV=1	SSPVEFEC(BTD[C])INEK|	NA	NA	NA	NA	NA	NA	1.23	NA	NA	NA	NA	NA	0.8	NA	NA	NA	NA	NA	NA	NA	NA	NA	NA	NA	NA	0.93	NA	0.24	NA	NA	NA	NA	NA	NA	NA	NA	NA	NA	NA	NA	NA	NA	NA	0.51	NA
O75131	202	CPNE3	CPNE3_HUMAN Copine-3 OS=Homo sapiens OX=9606 GN=CPNE3 PE=1 SV=1	ISLNSLC(BTD[C])YGDMDK|	NA	NA	NA	NA	NA	NA	NA	NA	NA	NA	NA	NA	NA	NA	NA	NA	NA	NA	NA	NA	NA	NA	NA	NA	NA	NA	NA	NA	NA	NA	NA	NA	NA	NA	NA	NA	NA	NA	NA	NA	NA	NA	NA	NA	NA
O75146	938	HIP1R	HIP1R_HUMAN Huntingtin-interacting protein 1-related protein OS=Homo sapiens OX=9606 GN=HIP1R PE=1 SV=2	LQEC(BTD[C])SR|	NA	NA	NA	NA	NA	NA	NA	NA	NA	NA	NA	NA	NA	NA	NA	NA	0.97	NA	NA	NA	0.97	NA	NA	NA	NA	NA	NA	NA	NA	NA	NA	NA	NA	NA	NA	NA	NA	NA	NA	NA	NA	NA	NA	NA	NA
O75146	240	HIP1R	HIP1R_HUMAN Huntingtin-interacting protein 1-related protein OS=Homo sapiens OX=9606 GN=HIP1R PE=1 SV=2	LHSC(BTD[C])LPADTLQGHR|	NA	NA	NA	NA	NA	NA	NA	NA	NA	NA	NA	NA	NA	NA	NA	NA	NA	NA	NA	NA	NA	NA	NA	NA	NA	NA	NA	NA	NA	NA	NA	NA	NA	NA	NA	NA	NA	NA	NA	NA	NA	NA	NA	NA	NA
O75146	827	HIP1R	HIP1R_HUMAN Huntingtin-interacting protein 1-related protein OS=Homo sapiens OX=9606 GN=HIP1R PE=1 SV=2	ILNSC(BTD[C])TDLMK|	NA	NA	NA	NA	NA	NA	NA	NA	NA	NA	NA	NA	NA	NA	NA	NA	NA	NA	NA	NA	NA	NA	NA	NA	NA	NA	NA	NA	NA	NA	NA	NA	NA	NA	NA	NA	NA	NA	NA	NA	NA	NA	NA	NA	NA
O75147	593	OBSL1	OBSL1_HUMAN Obscurin-like protein 1 OS=Homo sapiens OX=9606 GN=OBSL1 PE=1 SV=4	IC(BTD[C])TVSGHGR|	NA	NA	NA	NA	0.4	NA	0.58	NA	NA	NA	NA	NA	NA	NA	NA	NA	NA	NA	NA	NA	NA	NA	0.44	NA	NA	NA	NA	NA	NA	NA	NA	NA	NA	NA	NA	NA	NA	NA	NA	NA	NA	NA	NA	NA	NA
O75150	210	RNF40	BRE1B_HUMAN E3 ubiquitin-protein ligase BRE1B OS=Homo sapiens OX=9606 GN=RNF40 PE=1 SV=5	RVEELC(BTD[C])QR|	NA	1.67	1.04	NA	NA	1.1	NA	NA	NA	NA	NA	NA	NA	NA	NA	NA	NA	NA	NA	NA	NA	NA	NA	NA	NA	NA	NA	NA	NA	NA	1.01	NA	NA	NA	NA	NA	NA	0.4	NA	NA	NA	NA	NA	0.87	0.44
O75150	890	RNF40	BRE1B_HUMAN E3 ubiquitin-protein ligase BRE1B OS=Homo sapiens OX=9606 GN=RNF40 PE=1 SV=5	EIQPC(BTD[C])LAESR|	NA	NA	0.72	NA	NA	1	NA	NA	NA	NA	NA	0.69	NA	NA	NA	0.67	0.37	NA	NA	NA	NA	NA	NA	NA	0.52	NA	0.97	NA	NA	NA	NA	1.88	1	NA	NA	0.76	NA	0.94	NA	NA	0.99	0.58	NA	1.02	NA
O75150	69	RNF40	BRE1B_HUMAN E3 ubiquitin-protein ligase BRE1B OS=Homo sapiens OX=9606 GN=RNF40 PE=1 SV=5	QAC(BTD[C])EDELR|	NA	NA	NA	NA	NA	NA	NA	NA	NA	NA	NA	NA	NA	NA	NA	0.71	NA	NA	NA	NA	NA	NA	NA	NA	NA	NA	NA	NA	NA	NA	NA	NA	NA	NA	NA	NA	NA	NA	NA	NA	NA	NA	NA	NA	NA
O75152	209	ZC3H11A	ZC11A_HUMAN Zinc finger CCCH domain-containing protein 11A OS=Homo sapiens OX=9606 GN=ZC3H11A PE=1 SV=3	QGEC(BTD[C])LNFGIK|	NA	NA	NA	NA	NA	NA	NA	NA	NA	NA	NA	NA	NA	NA	NA	NA	NA	NA	NA	NA	NA	NA	NA	NA	NA	1.01	NA	NA	NA	NA	NA	NA	NA	NA	NA	NA	NA	NA	NA	NA	NA	NA	NA	NA	NA
O75152	559	ZC3H11A	ZC11A_HUMAN Zinc finger CCCH domain-containing protein 11A OS=Homo sapiens OX=9606 GN=ZC3H11A PE=1 SV=3	|RC(BTD[C])ETMR	NA	NA	NA	NA	NA	NA	NA	NA	NA	NA	NA	NA	NA	NA	NA	NA	NA	NA	NA	NA	NA	NA	NA	NA	NA	NA	NA	NA	NA	NA	NA	NA	NA	0.89	1.02	NA	1.33	NA	NA	NA	NA	NA	NA	NA	NA
O75152	588	ZC3H11A	ZC11A_HUMAN Zinc finger CCCH domain-containing protein 11A OS=Homo sapiens OX=9606 GN=ZC3H11A PE=1 SV=3	GDVASC(BTD[C])NTQVAEKPVLTAVPGITR|GDVASC(BTD[C])NTQVAEKPVLTAVPGITR	NA	NA	NA	NA	NA	NA	NA	NA	NA	NA	NA	NA	NA	NA	NA	NA	NA	NA	NA	NA	NA	NA	NA	NA	NA	NA	NA	NA	NA	NA	NA	NA	NA	NA	NA	NA	NA	NA	NA	NA	NA	NA	NA	NA	NA
O75153	200	CLUH	CLU_HUMAN Clustered mitochondria protein homolog OS=Homo sapiens OX=9606 GN=CLUH PE=1 SV=2	ERPLC(BTD[C])PLQPQNR|ERPLC(BTD[C])PLQPQNR	NA	NA	NA	NA	0.3	0.88	0.41	NA	NA	0.6	NA	NA	NA	NA	1.28	NA	NA	NA	NA	NA	NA	NA	0.33	NA	NA	NA	1.07	NA	1.94	1.04	0.84	1.98	1.18	0.99	1.11	0.59	0.93	0.74	1.07	1.02	0.67	0.52	2.23	0.99	1.45
O75153	214	CLUH	CLU_HUMAN Clustered mitochondria protein homolog OS=Homo sapiens OX=9606 GN=CLUH PE=1 SV=2	|DWKPLQC(BTD[C])LK	NA	2.26	NA	NA	NA	NA	NA	NA	NA	NA	NA	1.19	NA	NA	NA	0.78	0.71	NA	NA	0.54	1.13	NA	NA	NA	0.66	0.93	NA	NA	NA	NA	NA	NA	NA	NA	NA	0.44	0.99	NA	NA	0.81	NA	0.69	NA	0.88	1.08
O75153	1196	CLUH	CLU_HUMAN Clustered mitochondria protein homolog OS=Homo sapiens OX=9606 GN=CLUH PE=1 SV=2	|ESSEYLKC(BTD[C])LTQQAVALQR	NA	NA	0.61	NA	NA	NA	NA	NA	NA	NA	NA	0.9	NA	1.14	1.88	0.95	NA	NA	NA	NA	0.92	NA	NA	0.71	0.79	0.78	NA	NA	NA	NA	2.01	1.94	1.54	0.89	1.04	0.64	1.16	NA	1.06	NA	0.59	NA	NA	NA	NA
O75153	84	CLUH	CLU_HUMAN Clustered mitochondria protein homolog OS=Homo sapiens OX=9606 GN=CLUH PE=1 SV=2	EDTC(BTD[C])HR|EDTC(BTD[C])HR	NA	2.61	NA	NA	NA	NA	NA	NA	NA	NA	NA	1.34	NA	NA	NA	NA	0.64	NA	NA	NA	1.57	NA	NA	0.93	0.88	1.12	NA	NA	NA	NA	NA	NA	NA	NA	NA	NA	NA	NA	NA	NA	NA	NA	NA	NA	NA
O75165	2082	DNAJC13	DJC13_HUMAN DnaJ homolog subfamily C member 13 OS=Homo sapiens OX=9606 GN=DNAJC13 PE=1 SV=5	VIHALSENELC(BTD[C])VR|	NA	1.65	1.02	NA	NA	1.35	NA	NA	1	NA	NA	1.02	NA	NA	NA	1.15	0.55	NA	NA	NA	1.57	NA	NA	NA	NA	NA	NA	NA	NA	NA	0.48	NA	NA	NA	NA	NA	NA	NA	NA	NA	NA	NA	NA	NA	NA
O75165	1770	DNAJC13	DJC13_HUMAN DnaJ homolog subfamily C member 13 OS=Homo sapiens OX=9606 GN=DNAJC13 PE=1 SV=5	YNPGSESEC(BTD[C])IGHFK|	NA	NA	NA	NA	NA	NA	NA	NA	NA	NA	NA	NA	NA	NA	NA	NA	NA	NA	NA	NA	NA	NA	NA	NA	NA	NA	NA	NA	NA	NA	NA	NA	NA	NA	NA	NA	NA	NA	NA	NA	NA	NA	NA	0.96	NA
O75175	14	CNOT3	CNOT3_HUMAN CCR4-NOT transcription complex subunit 3 OS=Homo sapiens OX=9606 GN=CNOT3 PE=1 SV=1	LQGEIDRC(BTD[C])LK|	NA	4.53	0.89	NA	NA	NA	NA	NA	NA	NA	NA	NA	0.91	NA	NA	1.37	0.6	1.34	1	0.46	1.05	3.22	NA	0.76	0.83	NA	2.43	NA	NA	NA	NA	NA	NA	NA	NA	NA	NA	NA	NA	0.3	0.34	0.32	NA	NA	NA
O75177	47	SS18L1	CREST_HUMAN Calcium-responsive transactivator OS=Homo sapiens OX=9606 GN=SS18L1 PE=1 SV=2	TAEC(BTD[C])TQYQQILHR|	NA	NA	NA	NA	NA	NA	NA	NA	NA	NA	NA	NA	NA	NA	NA	NA	NA	NA	NA	NA	0.64	NA	NA	NA	NA	NA	NA	NA	NA	NA	NA	NA	NA	NA	NA	NA	NA	NA	NA	NA	NA	NA	NA	NA	NA
O75179	1746	ANKRD17	ANR17_HUMAN Ankyrin repeat domain-containing protein 17 OS=Homo sapiens OX=9606 GN=ANKRD17 PE=1 SV=3	GGC(BTD[C])NINAIR|	NA	NA	NA	NA	NA	1.39	NA	NA	NA	NA	NA	NA	NA	NA	NA	1.14	NA	NA	0.51	NA	0.89	NA	NA	1.05	NA	NA	NA	NA	NA	NA	NA	NA	NA	NA	NA	NA	NA	NA	NA	NA	NA	NA	NA	NA	NA
O75179	210	ANKRD17	ANR17_HUMAN Ankyrin repeat domain-containing protein 17 OS=Homo sapiens OX=9606 GN=ANKRD17 PE=1 SV=3	LTSSVSC(BTD[C])ALDEAAAALTR|	NA	NA	NA	NA	NA	NA	1.03	NA	NA	NA	NA	NA	NA	NA	NA	NA	NA	NA	NA	NA	NA	NA	NA	NA	NA	NA	NA	NA	NA	NA	NA	NA	NA	NA	NA	NA	NA	NA	NA	NA	NA	NA	NA	NA	NA
O75179	644	ANKRD17	ANR17_HUMAN Ankyrin repeat domain-containing protein 17 OS=Homo sapiens OX=9606 GN=ANKRD17 PE=1 SV=3	|AGHVC(BTD[C])TVQFLISK	NA	NA	NA	NA	NA	NA	NA	NA	NA	NA	NA	NA	NA	NA	0.86	NA	NA	NA	NA	NA	NA	NA	NA	NA	NA	NA	NA	NA	NA	NA	NA	NA	NA	NA	1.36	NA	NA	NA	NA	NA	NA	NA	NA	NA	NA
O75179	1158	ANKRD17	ANR17_HUMAN Ankyrin repeat domain-containing protein 17 OS=Homo sapiens OX=9606 GN=ANKRD17 PE=1 SV=3	|DTPLSLAC(BTD[C])SGGR	NA	NA	NA	NA	NA	NA	NA	NA	NA	NA	NA	NA	NA	NA	NA	NA	NA	NA	NA	NA	NA	1.64	NA	NA	NA	NA	NA	0.51	NA	NA	NA	NA	NA	NA	NA	NA	NA	NA	NA	0.65	NA	NA	NA	NA	NA
O75179	58	ANKRD17	ANR17_HUMAN Ankyrin repeat domain-containing protein 17 OS=Homo sapiens OX=9606 GN=ANKRD17 PE=1 SV=3	VC(BTD[C])DLLLK|	NA	NA	NA	NA	NA	NA	NA	NA	NA	NA	NA	1.07	NA	NA	NA	0.84	NA	NA	NA	NA	NA	NA	NA	NA	NA	NA	NA	NA	NA	NA	NA	NA	NA	NA	NA	NA	NA	NA	NA	NA	NA	NA	NA	NA	NA
O75182	792	SIN3B	SIN3B_HUMAN Paired amphipathic helix protein Sin3b OS=Homo sapiens OX=9606 GN=SIN3B PE=1 SV=2	|LHQTLC(BTD[C])SR	NA	NA	NA	NA	NA	NA	NA	NA	NA	NA	NA	NA	NA	NA	NA	NA	NA	NA	NA	NA	1.12	NA	NA	0.83	NA	NA	NA	NA	NA	NA	NA	NA	NA	NA	NA	NA	NA	NA	NA	NA	NA	NA	NA	NA	NA
O75190	275	DNAJB6	DNJB6_HUMAN DnaJ homolog subfamily B member 6 OS=Homo sapiens OX=9606 GN=DNAJB6 PE=1 SV=2	HAPHC(BTD[C])LSEEEGEQDRPR|	NA	NA	NA	NA	NA	NA	NA	NA	NA	NA	NA	NA	NA	NA	NA	NA	NA	1.2	NA	NA	0.79	NA	NA	0.77	NA	NA	NA	NA	NA	NA	NA	NA	NA	NA	NA	NA	NA	NA	NA	NA	NA	NA	NA	NA	NA
O75223	144	GGCT	GGCT_HUMAN Gamma-glutamylcyclotransferase OS=Homo sapiens OX=9606 GN=GGCT PE=1 SV=1	IIC(BTD[C])MGAK|IIC(BTD[C])MGAK	0.4	NA	0.72	0.4	NA	0.95	NA	0.72	1.1	NA	0.75	1.14	0.98	3.45	0.88	0.68	0.47	1.03	0.79	0.42	0.74	2.41	NA	0.77	0.8	0.98	NA	NA	1.78	0.49	NA	NA	1.29	NA	NA	NA	NA	0.3	NA	0.27	NA	0.39	NA	NA	NA
O75223	42	GGCT	GGCT_HUMAN Gamma-glutamylcyclotransferase OS=Homo sapiens OX=9606 GN=GGCT PE=1 SV=1	NPSAAFFC(BTD[C])VAR|	NA	NA	NA	NA	NA	NA	NA	NA	NA	NA	NA	NA	NA	NA	NA	0.86	NA	NA	0.66	0.48	0.96	NA	NA	0.83	0.97	1.05	NA	NA	NA	NA	NA	NA	NA	NA	NA	NA	NA	NA	NA	0.45	0.52	NA	0.37	1.15	0.68
O75306	347	NDUFS2	NDUS2_HUMAN NADH dehydrogenase [ubiquinone] iron-sulfur protein 2, mitochondrial OS=Homo sapiens OX=9606 GN=NDUFS2 PE=1 SV=2	IIAQC(BTD[C])LNK|IIAQC(BTD[C])LNK	NA	2.24	NA	0.46	NA	1.51	NA	NA	1.03	NA	0.89	1.26	0.7	NA	NA	1.16	0.42	1.03	NA	0.37	0.69	2.19	NA	NA	0.69	NA	2.01	NA	NA	NA	NA	NA	NA	NA	NA	NA	NA	NA	NA	NA	NA	0.92	NA	NA	NA
O75306	326	NDUFS2	NDUS2_HUMAN NADH dehydrogenase [ubiquinone] iron-sulfur protein 2, mitochondrial OS=Homo sapiens OX=9606 GN=NDUFS2 PE=1 SV=2	GDC(BTD[C])YDR|	NA	NA	NA	NA	NA	NA	NA	NA	NA	NA	NA	1.34	NA	NA	NA	NA	NA	NA	NA	NA	1.05	NA	NA	NA	NA	NA	NA	5.36	NA	NA	NA	NA	NA	NA	NA	NA	NA	0.87	NA	0.73	NA	NA	NA	NA	0.79
O75323	85	NIPSNAP2	NIPS2_HUMAN Protein NipSnap homolog 2 OS=Homo sapiens OX=9606 GN=NIPSNAP2 PE=1 SV=1	|LQFHNVKPEC(BTD[C])LEAYNK	NA	NA	NA	NA	NA	NA	NA	NA	NA	NA	NA	0.89	NA	0.8	NA	NA	NA	NA	NA	NA	NA	NA	NA	NA	NA	NA	NA	NA	NA	NA	NA	NA	NA	NA	0.92	NA	NA	NA	NA	NA	NA	NA	NA	NA	NA
O75323	93	NIPSNAP2	NIPS2_HUMAN Protein NipSnap homolog 2 OS=Homo sapiens OX=9606 GN=NIPSNAP2 PE=1 SV=1	|IC(BTD[C])QEVLPK	NA	NA	NA	NA	NA	NA	NA	NA	NA	NA	NA	NA	NA	NA	NA	1.19	NA	1.18	NA	NA	0.89	NA	NA	NA	NA	NA	NA	NA	NA	NA	NA	NA	NA	NA	NA	NA	NA	NA	NA	NA	NA	NA	NA	NA	NA
O75326	266	SEMA7A	SEM7A_HUMAN Semaphorin-7A OS=Homo sapiens OX=9606 GN=SEMA7A PE=1 SV=1	VAQLC(BTD[C])R|	NA	NA	NA	NA	NA	1.86	NA	NA	NA	NA	NA	NA	NA	NA	NA	1.42	NA	NA	NA	NA	NA	NA	NA	NA	NA	NA	NA	NA	NA	NA	NA	NA	NA	NA	NA	NA	NA	NA	NA	NA	NA	NA	NA	NA	NA
O75326	120	SEMA7A	SEM7A_HUMAN Semaphorin-7A OS=Homo sapiens OX=9606 GN=SEMA7A PE=1 SV=1	GSC(BTD[C])LDKR|	NA	NA	NA	NA	NA	1	NA	NA	NA	NA	NA	NA	NA	NA	NA	NA	NA	NA	NA	NA	NA	NA	NA	NA	NA	NA	NA	NA	NA	NA	NA	NA	NA	NA	NA	NA	NA	NA	NA	NA	NA	NA	NA	NA	NA
O75326	143	SEMA7A	SEM7A_HUMAN Semaphorin-7A OS=Homo sapiens OX=9606 GN=SEMA7A PE=1 SV=1	|SEGLLAC(BTD[C])GTNAR	NA	NA	NA	NA	NA	NA	NA	NA	NA	NA	NA	NA	NA	NA	NA	1.75	NA	NA	NA	NA	NA	NA	NA	NA	NA	0.96	NA	NA	NA	NA	NA	NA	NA	NA	NA	NA	NA	NA	NA	NA	NA	NA	NA	NA	NA
O75347	67	TBCA	TBCA_HUMAN Tubulin-specific chaperone A OS=Homo sapiens OX=9606 GN=TBCA PE=1 SV=3	MMIPDC(BTD[C])QR|MMIPDC(BTD[C])QR	NA	NA	NA	0.66	NA	NA	NA	NA	NA	NA	0.67	1.01	1.6	NA	NA	NA	NA	NA	1.06	0.81	NA	NA	NA	0.97	NA	0.74	NA	NA	1.84	NA	NA	NA	1.04	NA	NA	NA	NA	NA	NA	NA	NA	NA	NA	NA	NA
O75348	69	ATP6V1G1	VATG1_HUMAN V-type proton ATPase subunit G 1 OS=Homo sapiens OX=9606 GN=ATP6V1G1 PE=1 SV=3	GSC(BTD[C])STEVEK|GSC(BTD[C])STEVEKETQEK GSC(BTD[C])STEVEK	NA	NA	NA	0.48	NA	NA	NA	NA	NA	NA	NA	0.9	NA	NA	0.88	0.89	NA	NA	0.7	0.65	0.9	NA	NA	NA	0.98	NA	0.92	4.73	NA	0.38	0.85	NA	NA	0.78	1.01	0.26	NA	NA	0.72	1.2	NA	0.87	NA	1.04	1.08
O75351	62	VPS4B	VPS4B_HUMAN Vacuolar protein sorting-associated protein 4B OS=Homo sapiens OX=9606 GN=VPS4B PE=1 SV=2	AKC(BTD[C])TEYLDR|AKC(BTD[C])TEYLDR	0.56	2.81	0.96	NA	0.6	1.56	NA	0.62	1.03	NA	0.8	1.12	0.82	NA	NA	1.07	0.53	1.28	1.07	0.37	1.17	2.16	NA	0.98	0.98	NA	NA	NA	1.17	0.22	0.27	NA	NA	NA	NA	0.2	NA	NA	NA	0.63	0.16	0.79	NA	NA	NA
O75362	93	ZNF217	ZN217_HUMAN Zinc finger protein 217 OS=Homo sapiens OX=9606 GN=ZNF217 PE=1 SV=1	PTLC(BTD[C])EPAVLR|	NA	NA	NA	NA	NA	NA	NA	NA	NA	NA	NA	NA	NA	NA	NA	0.96	NA	NA	NA	NA	NA	NA	NA	NA	NA	NA	NA	NA	NA	NA	NA	NA	NA	NA	NA	NA	NA	NA	NA	NA	NA	NA	NA	NA	NA
O75367	297	H2AFY	H2AY_HUMAN Core histone macro-H2A.1 OS=Homo sapiens OX=9606 GN=H2AFY PE=1 SV=4	NC(BTD[C])LALADDKK|NC(BTD[C])LALADDKK	0.61	1.82	1.34	0.38	0.58	2.44	1.02	0.81	1.19	0.47	1.03	2.32	0.82	0.69	1	1.42	0.65	1.44	0.95	NA	1.61	1.07	1.15	1.26	1.02	1.22	6.75	0.44	0.91	0.69	0.52	NA	NA	0.93	1.82	0.33	NA	0.4	1.09	0.49	0.23	0.65	0.42	0.92	NA
O75367	276	H2AFY	H2AY_HUMAN Core histone macro-H2A.1 OS=Homo sapiens OX=9606 GN=H2AFY PE=1 SV=4	FVIHC(BTD[C])NSPVWGADK|	NA	1.23	1.62	NA	NA	NA	NA	NA	NA	NA	NA	1.36	NA	NA	NA	NA	1.02	NA	NA	NA	1.13	1.21	NA	1.41	NA	0.99	NA	NA	NA	NA	NA	NA	NA	NA	NA	NA	NA	NA	NA	NA	NA	NA	NA	NA	NA
O75369	1868	FLNB	FLNB_HUMAN Filamin-B OS=Homo sapiens OX=9606 GN=FLNB PE=1 SV=2	|AEISC(BTD[C])IDNK	NA	NA	0.83	NA	0.83	0.87	0.74	1.31	0.86	1.13	0.77	1.27	0.69	0.98	1.18	NA	NA	1.24	0.65	NA	1.07	NA	NA	0.88	NA	0.98	1.9	1.81	NA	1.46	1.44	1.27	NA	0.91	1.37	NA	0.78	NA	0.91	0.7	0.64	0.63	1.09	0.76	1.06
O75369	2501	FLNB	FLNB_HUMAN Filamin-B OS=Homo sapiens OX=9606 GN=FLNB PE=1 SV=2	SSTETC(BTD[C])YSAIPK|SSTETC(BTD[C])YSAIPK	NA	3.26	NA	0.47	0.41	0.99	0.64	NA	1.03	0.68	0.77	0.82	0.78	1.08	1.07	0.81	0.71	0.86	0.69	0.48	0.92	2.52	0.63	0.79	0.76	0.83	1.07	3.7	2.6	0.62	NA	1.06	1.18	NA	NA	NA	0.86	1.07	1	1.1	0.93	0.65	NA	NA	0.88
O75369	450	FLNB	FLNB_HUMAN Filamin-B OS=Homo sapiens OX=9606 GN=FLNB PE=1 SV=2	SPFVVQVGEAC(BTD[C])NPNACR|	NA	NA	0.74	0.47	NA	1.15	1.5	1.24	0.88	0.67	1.08	NA	0.98	0.96	1.94	0.93	0.55	0.87	0.7	0.34	0.69	NA	NA	0.68	0.62	0.6	NA	0.45	NA	0.79	NA	2.86	1	1.12	NA	0.6	0.87	0.65	1.08	NA	0.33	NA	0.35	0.59	0.48
O75369	2556	FLNB	FLNB_HUMAN Filamin-B OS=Homo sapiens OX=9606 GN=FLNB PE=1 SV=2	AGSNMLLIGVHGPTTPC(BTD[C])EEVSMK|	NA	NA	1.02	NA	0.98	NA	NA	NA	NA	0.59	NA	NA	NA	NA	NA	NA	NA	NA	NA	NA	1.5	NA	NA	1.52	NA	1.48	NA	NA	NA	NA	NA	NA	NA	NA	NA	NA	NA	NA	NA	NA	NA	NA	NA	NA	NA
O75369	416	FLNB	FLNB_HUMAN Filamin-B OS=Homo sapiens OX=9606 GN=FLNB PE=1 SV=2	C(BTD[C])VYKPMQPGPHVVK|C(BTD[C])VYKPMQPGPHVVK	0.91	NA	NA	NA	0.96	NA	1.03	0.91	NA	0.59	NA	1.27	NA	NA	NA	0.86	0.95	NA	NA	NA	0.99	NA	1.11	1.02	NA	1.08	NA	NA	NA	NA	NA	NA	NA	NA	NA	NA	NA	NA	NA	NA	0.26	NA	NA	NA	NA
O75369	2537	FLNB	FLNB_HUMAN Filamin-B OS=Homo sapiens OX=9606 GN=FLNB PE=1 SV=2	SSFLVDC(BTD[C])SK|SSFLVDC(BTD[C])SK	NA	1.91	NA	0.6	0.93	NA	1.14	1.08	1.2	0.57	NA	1.53	2.17	NA	NA	1.17	NA	NA	NA	NA	1.18	1.8	NA	1.02	0.9	1.19	3.36	NA	NA	NA	NA	NA	NA	NA	NA	NA	NA	NA	NA	NA	NA	NA	NA	NA	NA
O75369	2431	FLNB	FLNB_HUMAN Filamin-B OS=Homo sapiens OX=9606 GN=FLNB PE=1 SV=2	MDC(BTD[C])QETPEGYK|MDC(BTD[C])QETPEGYK	NA	2.61	NA	0.35	NA	1.48	NA	NA	1.14	0.53	0.88	1.43	0.84	NA	1.08	1.03	0.63	1.17	0.58	NA	1.02	2.2	NA	1.03	0.93	1.06	NA	NA	NA	NA	NA	NA	NA	NA	NA	NA	NA	0.36	NA	NA	NA	NA	NA	0.89	0.35
O75369	2333	FLNB	FLNB_HUMAN Filamin-B OS=Homo sapiens OX=9606 GN=FLNB PE=1 SV=2	VHSPSGAVEEC(BTD[C])HVSELEPDK|	0.69	1.84	1.24	0.4	1	1.14	1.15	1.09	1.1	0.51	1.08	1.86	0.84	2.12	1.68	1.05	0.71	1.31	NA	0.4	1.13	1.95	1.14	1.04	1.04	1.09	3.4	0.06	1.35	NA	NA	NA	NA	1.53	1.79	0.12	1.29	0.46	0.99	0.29	NA	0.61	0.39	0.7	0.54
O75369	1952	FLNB	FLNB_HUMAN Filamin-B OS=Homo sapiens OX=9606 GN=FLNB PE=1 SV=2	|DEPC(BTD[C])LLK	0.79	3.32	0.92	NA	0.57	1.41	0.7	0.87	1.07	0.49	NA	0.99	NA	1.04	1.66	0.9	0.74	NA	NA	NA	1.01	2.29	0.78	NA	0.98	1.11	2.26	0.22	NA	NA	NA	1.38	1.57	1.16	NA	NA	NA	0.24	1.04	0.3	NA	0.32	0.28	0.4	0.39
O75369	2115	FLNB	FLNB_HUMAN Filamin-B OS=Homo sapiens OX=9606 GN=FLNB PE=1 SV=2	APSVATVGSIC(BTD[C])DLNLK|	0.87	2.27	NA	0.46	0.66	1.07	0.91	0.87	NA	0.49	0.74	1.13	0.73	1.07	1.68	NA	NA	0.99	0.57	0.36	0.86	2.06	0.99	0.83	0.84	0.91	1.99	1.08	NA	NA	NA	1.99	1.29	1.47	2.01	NA	0.94	0.36	1.29	0.44	0.28	0.41	0.43	0.5	0.39
O75369	2154	FLNB	FLNB_HUMAN Filamin-B OS=Homo sapiens OX=9606 GN=FLNB PE=1 SV=2	NSHC(BTD[C])VR|NSHC(BTD[C])VR	0.35	2.22	0.69	0.43	0.37	0.97	0.46	0.48	0.92	0.48	0.59	0.84	0.76	1.29	NA	NA	NA	0.74	0.96	NA	NA	2.05	0.63	NA	NA	NA	1.45	NA	2.04	0.21	0.39	2.41	1.3	1.7	3.54	0.23	0.66	0.67	1.39	0.33	0.31	0.34	0.7	0.42	NA
O75369	1326	FLNB	FLNB_HUMAN Filamin-B OS=Homo sapiens OX=9606 GN=FLNB PE=1 SV=2	VAVTEGC(BTD[C])QPSR|	0.47	3.43	0.71	0.4	0.48	1.02	NA	0.52	0.84	0.38	0.67	0.77	0.92	NA	0.64	0.76	0.4	0.76	NA	0.43	0.73	1.68	0.74	0.79	0.65	0.75	1.39	0.4	3.45	NA	NA	1.69	1.21	1.14	2.12	NA	0.48	0.52	0.77	0.42	0.42	0.26	0.8	0.37	1.02
O75369	991	FLNB	FLNB_HUMAN Filamin-B OS=Homo sapiens OX=9606 GN=FLNB PE=1 SV=2	VVPC(BTD[C])LVTPVTGR|	0.6	3.54	0.63	0.48	0.48	1	0.91	0.53	0.99	0.37	0.53	0.69	0.87	NA	1.62	0.69	0.52	0.81	0.59	0.46	0.65	2.28	0.99	0.75	0.74	0.68	1.51	0.29	1.92	NA	NA	1.77	0.68	0.89	1.57	0.3	NA	0.28	1.22	0.43	0.24	0.6	NA	0.42	0.37
O75369	1617	FLNB	FLNB_HUMAN Filamin-B OS=Homo sapiens OX=9606 GN=FLNB PE=1 SV=2	|ATQTGDASKC(BTD[C])LATGPGIASTVK	0.86	1.72	0.6	0.9	0.27	1.49	0.67	0.81	1.59	NA	0.27	0.77	NA	NA	NA	0.7	NA	NA	0.36	0.35	0.75	NA	0.48	0.73	0.87	0.8	2.17	0.22	0.7	0.21	NA	NA	NA	NA	NA	0.1	1.07	0.35	NA	NA	0.24	0.44	0.23	0.57	0.36
O75369	706	FLNB	FLNB_HUMAN Filamin-B OS=Homo sapiens OX=9606 GN=FLNB PE=1 SV=2	MDGTYAC(BTD[C])SYTPVK|MDGTYAC(BTD[C])SYTPVK	1.02	2.37	1.11	0.5	NA	0.96	NA	NA	NA	NA	NA	NA	0.67	NA	1.71	NA	0.63	0.98	NA	NA	0.96	1.54	NA	NA	0.97	0.94	NA	0.16	NA	NA	NA	NA	NA	NA	NA	NA	NA	NA	NA	NA	0.4	0.54	NA	0.61	0.39
O75369	455	FLNB	FLNB_HUMAN Filamin-B OS=Homo sapiens OX=9606 GN=FLNB PE=1 SV=2	SPFVVQVGEACNPNAC(BTD[C])R|	NA	NA	0.88	NA	1.13	1.02	NA	1.41	0.85	NA	NA	0.9	1.11	1.47	2.03	1.19	0.84	0.89	NA	0.65	0.75	1.5	1.48	0.85	0.66	0.92	NA	0.49	NA	0.57	NA	2.96	1.02	1.26	NA	0.29	1.01	0.41	1.82	0.21	NA	0.38	NA	0.45	0.4
O75369	604	FLNB	FLNB_HUMAN Filamin-B OS=Homo sapiens OX=9606 GN=FLNB PE=1 SV=2	IEYNDQNDGSC(BTD[C])DVK|	NA	NA	NA	NA	0.88	NA	1.34	NA	NA	NA	NA	1.07	NA	NA	NA	1.1	NA	NA	NA	NA	1.25	NA	NA	NA	1.07	NA	NA	0.19	NA	NA	NA	NA	NA	NA	NA	NA	NA	NA	NA	0.38	0.3	NA	0.36	0.84	0.94
O75369	1915	FLNB	FLNB_HUMAN Filamin-B OS=Homo sapiens OX=9606 GN=FLNB PE=1 SV=2	RC(BTD[C])SQVK|	0.46	2.12	0.59	NA	0.41	0.98	0.63	NA	0.73	NA	1.53	0.68	NA	NA	1.74	0.72	NA	0.54	NA	NA	0.81	1.53	NA	0.67	NA	0.75	0.84	NA	NA	1.52	NA	NA	NA	1	1.15	1.09	1	NA	NA	NA	NA	NA	NA	NA	NA
O75369	660	FLNB	FLNB_HUMAN Filamin-B OS=Homo sapiens OX=9606 GN=FLNB PE=1 SV=2	SGC(BTD[C])IVNNLAEFTVDPK|	0.67	NA	NA	NA	0.53	NA	1.02	0.76	NA	NA	NA	NA	NA	NA	NA	NA	NA	NA	NA	NA	NA	NA	0.81	NA	NA	NA	NA	NA	NA	NA	NA	NA	NA	NA	NA	NA	NA	NA	NA	NA	NA	NA	NA	NA	NA
O75369	2057	FLNB	FLNB_HUMAN Filamin-B OS=Homo sapiens OX=9606 GN=FLNB PE=1 SV=2	|VDIQTEDLEDGTC(BTD[C])K	NA	1.95	1.44	NA	NA	NA	NA	NA	NA	NA	NA	1.37	NA	NA	NA	1.03	0.66	1.02	NA	NA	NA	NA	NA	NA	NA	NA	NA	NA	NA	NA	NA	NA	NA	NA	NA	NA	NA	NA	NA	NA	NA	NA	NA	NA	NA
O75369	1280	FLNB	FLNB_HUMAN Filamin-B OS=Homo sapiens OX=9606 GN=FLNB PE=1 SV=2	AHIANPSGASTEC(BTD[C])FVTDNADGTYQVEYTPFEK|	NA	NA	NA	NA	NA	NA	NA	NA	NA	NA	NA	NA	NA	NA	NA	NA	NA	NA	NA	NA	NA	NA	NA	NA	NA	NA	NA	NA	NA	NA	NA	NA	NA	NA	NA	NA	NA	NA	NA	NA	NA	NA	NA	NA	NA
O75369	769	FLNB	FLNB_HUMAN Filamin-B OS=Homo sapiens OX=9606 GN=FLNB PE=1 SV=2	ANEPTHFTVDC(BTD[C])TEAGEGDVSVGIK|	NA	NA	NA	NA	NA	NA	NA	NA	NA	NA	NA	NA	NA	NA	NA	NA	1.6	NA	NA	NA	NA	NA	NA	NA	NA	NA	NA	NA	NA	NA	NA	NA	NA	NA	NA	NA	NA	NA	NA	NA	NA	NA	NA	NA	NA
O75369	2248	FLNB	FLNB_HUMAN Filamin-B OS=Homo sapiens OX=9606 GN=FLNB PE=1 SV=2	|NGSC(BTD[C])GVSYIAQEPGNYEVSIK	NA	NA	NA	NA	NA	NA	NA	NA	NA	NA	NA	NA	NA	NA	NA	NA	NA	NA	NA	NA	NA	NA	NA	NA	0.91	NA	NA	NA	NA	NA	NA	NA	NA	NA	NA	NA	NA	NA	NA	NA	NA	NA	NA	NA	NA
O75369	1158	FLNB	FLNB_HUMAN Filamin-B OS=Homo sapiens OX=9606 GN=FLNB PE=1 SV=2	VGEAGLLSVDC(BTD[C])SEAGPGALGLEAVSDSGTK|	NA	NA	NA	NA	NA	NA	NA	NA	NA	NA	NA	NA	NA	NA	NA	NA	NA	NA	NA	NA	NA	NA	NA	NA	NA	NA	NA	NA	NA	NA	NA	NA	NA	NA	NA	NA	NA	NA	NA	NA	NA	NA	NA	NA	NA
O75380	87	NDUFS6	NDUS6_HUMAN NADH dehydrogenase [ubiquinone] iron-sulfur protein 6, mitochondrial OS=Homo sapiens OX=9606 GN=NDUFS6 PE=1 SV=1	VIAC(BTD[C])DGGGGALGHPK|VIAC(BTD[C])DGGGGALGHPK	0.34	3.7	NA	NA	NA	1.19	NA	0.4	1.37	0.93	0.94	0.95	1.51	0.87	NA	NA	NA	NA	0.77	0.53	0.64	3.09	0.63	0.48	0.51	NA	NA	0.68	NA	NA	0.05	1.79	1.01	1.07	NA	NA	NA	0.29	NA	0.45	0.53	NA	0.72	0.61	0.69
O75382	115	TRIM3	TRIM3_HUMAN Tripartite motif-containing protein 3 OS=Homo sapiens OX=9606 GN=TRIM3 PE=1 SV=2	PLSC(BTD[C])PNHEGK|	NA	NA	NA	NA	NA	NA	NA	NA	NA	NA	NA	NA	NA	NA	NA	NA	NA	NA	NA	NA	NA	NA	NA	NA	NA	NA	NA	NA	NA	NA	NA	NA	NA	NA	NA	NA	NA	NA	NA	NA	NA	NA	NA	NA	NA
O75390	211	CS	CISY_HUMAN Citrate synthase, mitochondrial OS=Homo sapiens OX=9606 GN=CS PE=1 SV=2	LPC(BTD[C])VAAK|	0.38	3.92	0.75	0.68	0.47	1.11	0.55	0.5	1.12	0.98	0.78	0.79	1.23	0.93	NA	0.71	0.66	0.83	0.73	0.63	0.68	2.75	NA	0.81	0.72	0.74	1.69	1.01	3.18	1.26	NA	NA	NA	1.01	1.1	0.88	1.03	0.87	NA	0.74	0.7	0.86	1.08	0.96	0.73
O75390	101	CS	CISY_HUMAN Citrate synthase, mitochondrial OS=Homo sapiens OX=9606 GN=CS PE=1 SV=2	GFSIPEC(BTD[C])QK|GFSIPEC(BTD[C])QK	0.49	3.4	0.73	0.56	NA	1.08	NA	NA	1.13	0.57	0.63	0.66	1.39	1.28	1.56	0.59	0.6	0.74	0.69	NA	0.62	2.14	0.58	0.67	0.68	0.64	1.27	NA	3.39	NA	NA	NA	1.32	0.96	NA	NA	NA	NA	1.3	NA	NA	0.5	NA	0.74	NA
O75391	191	SPAG7	SPAG7_HUMAN Sperm-associated antigen 7 OS=Homo sapiens OX=9606 GN=SPAG7 PE=1 SV=2	|TYGC(BTD[C])VPVANK	NA	NA	NA	NA	NA	NA	NA	NA	NA	NA	NA	NA	NA	NA	NA	NA	NA	NA	NA	NA	0.97	NA	NA	NA	NA	NA	0.9	NA	NA	NA	NA	1.17	NA	NA	NA	NA	NA	NA	NA	NA	NA	NA	NA	NA	NA
O75400	185	PRPF40A	PR40A_HUMAN Pre-mRNA-processing factor 40 homolog A OS=Homo sapiens OX=9606 GN=PRPF40A PE=1 SV=2	|TPAEQLLSKC(BTD[C])PWK	NA	NA	NA	NA	NA	NA	NA	NA	NA	NA	NA	NA	NA	NA	NA	NA	NA	NA	NA	NA	NA	NA	NA	NA	NA	NA	NA	NA	NA	NA	NA	NA	NA	NA	NA	0.24	NA	NA	NA	NA	NA	NA	NA	NA	NA
O75410	174	TACC1	TACC1_HUMAN Transforming acidic coiled-coil-containing protein 1 OS=Homo sapiens OX=9606 GN=TACC1 PE=1 SV=2	AAHGC(BTD[C])VTAVSGK|AAHGC(BTD[C])VTAVSGK	0.56	3.06	0.92	0.6	0.44	1.28	1.15	0.92	1.16	0.42	0.95	0.91	1.12	NA	1.31	1.04	0.76	1	1.17	1.7	0.89	2.19	0.95	0.68	NA	0.96	1.8	NA	NA	NA	NA	NA	NA	1.03	2.13	NA	NA	NA	NA	NA	NA	NA	NA	NA	NA
O75410	514	TACC1	TACC1_HUMAN Transforming acidic coiled-coil-containing protein 1 OS=Homo sapiens OX=9606 GN=TACC1 PE=1 SV=2	LASTSC(BTD[C])GQK|	NA	NA	0.93	0.73	NA	0.99	NA	NA	1.05	NA	NA	1.18	NA	NA	0.87	NA	0.75	0.67	NA	NA	0.79	NA	NA	0.95	0.66	0.73	0.8	0.73	NA	NA	NA	1.26	1.34	NA	NA	NA	NA	0.62	NA	NA	NA	0.66	NA	NA	NA
O75410	715	TACC1	TACC1_HUMAN Transforming acidic coiled-coil-containing protein 1 OS=Homo sapiens OX=9606 GN=TACC1 PE=1 SV=2	KC(BTD[C])AQDYLAR|KC(BTD[C])AQDYLAR	NA	NA	NA	NA	NA	0.96	NA	NA	NA	NA	NA	NA	NA	NA	NA	NA	0.97	1.02	NA	NA	NA	NA	NA	NA	0.59	NA	NA	NA	NA	NA	NA	NA	NA	NA	NA	NA	NA	0.54	NA	0.53	NA	0.49	NA	0.61	0.4
O75410	482	TACC1	TACC1_HUMAN Transforming acidic coiled-coil-containing protein 1 OS=Homo sapiens OX=9606 GN=TACC1 PE=1 SV=2	KHETQSLALDAC(BTD[C])SR|	NA	NA	NA	NA	NA	NA	NA	NA	NA	NA	NA	NA	NA	NA	NA	NA	NA	NA	NA	NA	0.99	NA	NA	NA	NA	NA	NA	NA	NA	NA	NA	NA	NA	NA	NA	NA	NA	NA	NA	NA	NA	NA	NA	NA	NA
O75410	794	TACC1	TACC1_HUMAN Transforming acidic coiled-coil-containing protein 1 OS=Homo sapiens OX=9606 GN=TACC1 PE=1 SV=2	IC(BTD[C])DELIAK|	NA	NA	NA	NA	NA	NA	NA	NA	NA	NA	NA	NA	NA	NA	NA	NA	NA	NA	NA	NA	NA	1.19	NA	NA	NA	NA	NA	NA	NA	NA	NA	NA	NA	NA	NA	NA	NA	NA	NA	NA	NA	NA	NA	NA	NA
O75410	219	TACC1	TACC1_HUMAN Transforming acidic coiled-coil-containing protein 1 OS=Homo sapiens OX=9606 GN=TACC1 PE=1 SV=2	AGNSC(BTD[C])PELVPSR|	NA	NA	NA	NA	NA	NA	NA	NA	NA	NA	NA	NA	NA	NA	NA	NA	NA	NA	NA	NA	NA	NA	NA	NA	NA	0.74	NA	NA	NA	NA	NA	NA	NA	NA	NA	NA	NA	NA	NA	NA	NA	NA	NA	NA	NA
O75410	78	TACC1	TACC1_HUMAN Transforming acidic coiled-coil-containing protein 1 OS=Homo sapiens OX=9606 GN=TACC1 PE=1 SV=2	ESC(BTD[C])DPSLGLAGPGAK|	NA	NA	NA	NA	NA	NA	NA	NA	NA	NA	NA	NA	NA	NA	NA	0.91	NA	NA	NA	NA	NA	NA	NA	NA	NA	NA	NA	NA	NA	NA	NA	NA	NA	NA	NA	NA	NA	NA	NA	NA	NA	NA	NA	NA	NA
O75414	56	NME6	NDK6_HUMAN Nucleoside diphosphate kinase 6 OS=Homo sapiens OX=9606 GN=NME6 PE=1 SV=3	KEDC(BTD[C])QR|	NA	NA	0.68	NA	NA	NA	NA	NA	0.8	NA	NA	NA	NA	NA	NA	1.08	NA	NA	NA	NA	1.02	NA	NA	NA	NA	NA	NA	NA	NA	NA	NA	NA	NA	NA	NA	NA	NA	NA	NA	1.07	NA	NA	NA	NA	1.04
O75431	51	MTX2	MTX2_HUMAN Metaxin-2 OS=Homo sapiens OX=9606 GN=MTX2 PE=1 SV=1	LQMC(BTD[C])NLPIK|	NA	NA	NA	NA	NA	NA	NA	NA	NA	NA	NA	NA	NA	NA	NA	NA	0.58	NA	NA	NA	NA	NA	NA	NA	NA	NA	NA	NA	NA	NA	NA	NA	NA	NA	NA	NA	NA	NA	NA	NA	NA	NA	NA	NA	NA
O75439	62	PMPCB	MPPB_HUMAN Mitochondrial-processing peptidase subunit beta OS=Homo sapiens OX=9606 GN=PMPCB PE=1 SV=2	VTC(BTD[C])LESGLR|	NA	NA	NA	NA	NA	0.55	NA	NA	0.72	NA	0.8	0.61	NA	NA	NA	0.52	0.44	0.4	NA	NA	NA	0.54	NA	NA	0.35	0.23	0.52	NA	NA	NA	NA	NA	NA	NA	NA	NA	NA	NA	NA	NA	NA	NA	NA	0.65	NA
O75439	389	PMPCB	MPPB_HUMAN Mitochondrial-processing peptidase subunit beta OS=Homo sapiens OX=9606 GN=PMPCB PE=1 SV=2	LC(BTD[C])TSVTESEVAR|	NA	NA	NA	NA	NA	NA	NA	NA	NA	NA	NA	NA	NA	NA	NA	1.01	NA	NA	NA	NA	1.1	NA	NA	NA	NA	NA	NA	NA	NA	NA	NA	NA	NA	NA	NA	NA	NA	NA	NA	NA	NA	NA	NA	NA	NA
O75439	265	PMPCB	MPPB_HUMAN Mitochondrial-processing peptidase subunit beta OS=Homo sapiens OX=9606 GN=PMPCB PE=1 SV=2	FHFGDSLC(BTD[C])THK|	NA	NA	0.99	NA	NA	NA	NA	NA	1.01	NA	NA	NA	NA	NA	NA	NA	1.08	NA	NA	NA	0.89	NA	NA	NA	NA	NA	NA	NA	NA	NA	NA	NA	NA	NA	NA	NA	NA	NA	NA	NA	NA	NA	NA	NA	NA
O75439	277	PMPCB	MPPB_HUMAN Mitochondrial-processing peptidase subunit beta OS=Homo sapiens OX=9606 GN=PMPCB PE=1 SV=2	|GEIPALPPC(BTD[C])K	NA	NA	1.08	NA	NA	NA	NA	NA	NA	NA	NA	1.04	1.23	NA	NA	1.57	0.87	1.29	NA	NA	1.23	NA	NA	NA	1.08	1.21	NA	NA	NA	NA	NA	NA	NA	NA	NA	NA	NA	NA	1.16	NA	NA	NA	NA	NA	NA
O75439	485	PMPCB	MPPB_HUMAN Mitochondrial-processing peptidase subunit beta OS=Homo sapiens OX=9606 GN=PMPCB PE=1 SV=2	SNMC(BTD[C])WLRD|	NA	NA	NA	NA	NA	NA	NA	NA	NA	NA	NA	NA	NA	NA	NA	NA	NA	NA	NA	NA	NA	NA	NA	1.04	NA	NA	NA	NA	NA	NA	NA	NA	NA	NA	NA	NA	NA	NA	NA	NA	NA	NA	NA	NA	NA
O75448	218	MED24	MED24_HUMAN Mediator of RNA polymerase II transcription subunit 24 OS=Homo sapiens OX=9606 GN=MED24 PE=1 SV=1	|SQAEQC(BTD[C])GTLIR	NA	NA	0.98	NA	NA	1.1	NA	NA	0.97	NA	NA	1.01	NA	NA	NA	0.95	0.7	NA	NA	NA	NA	NA	NA	NA	0.76	0.96	NA	NA	NA	NA	NA	NA	NA	NA	NA	NA	NA	NA	NA	NA	NA	NA	NA	NA	NA
O75448	161	MED24	MED24_HUMAN Mediator of RNA polymerase II transcription subunit 24 OS=Homo sapiens OX=9606 GN=MED24 PE=1 SV=1	QLAMC(BTD[C])LQR|	NA	NA	NA	NA	NA	NA	NA	NA	NA	NA	NA	NA	NA	NA	NA	NA	NA	NA	NA	NA	NA	NA	NA	NA	NA	NA	NA	NA	NA	NA	NA	NA	NA	NA	NA	NA	NA	NA	NA	NA	NA	NA	NA	NA	NA
O75448	110	MED24	MED24_HUMAN Mediator of RNA polymerase II transcription subunit 24 OS=Homo sapiens OX=9606 GN=MED24 PE=1 SV=1	|LSC(BTD[C])HGK	NA	NA	NA	NA	NA	NA	NA	NA	NA	NA	NA	1.16	NA	NA	NA	NA	NA	NA	NA	NA	NA	NA	NA	NA	NA	NA	NA	NA	NA	NA	NA	NA	NA	NA	NA	NA	NA	NA	NA	NA	NA	NA	NA	NA	NA
O75475	204	PSIP1	PSIP1_HUMAN PC4 and SFRS1-interacting protein OS=Homo sapiens OX=9606 GN=PSIP1 PE=1 SV=1	QPC(BTD[C])PSESDIITEEDKSK|	NA	NA	NA	NA	NA	NA	NA	NA	NA	NA	NA	NA	NA	NA	NA	NA	NA	NA	NA	NA	NA	NA	NA	NA	NA	NA	NA	NA	NA	0.34	NA	NA	NA	NA	NA	NA	NA	NA	NA	NA	NA	NA	NA	NA	NA
O75521	368	ECI2	ECI2_HUMAN Enoyl-CoA delta isomerase 2, mitochondrial OS=Homo sapiens OX=9606 GN=ECI2 PE=1 SV=4	LHAVNAEEC(BTD[C])NVLQGR|	0.5	1.84	0.91	0.53	1	1.4	NA	0.82	NA	0.76	1.12	1.32	0.86	NA	NA	1.08	0.85	1.12	0.71	0.45	NA	1.57	0.72	1.03	0.96	1.03	NA	0.15	NA	NA	NA	NA	NA	NA	NA	NA	1.25	0.68	NA	NA	NA	NA	NA	0.79	0.74
O75521	77	ECI2	ECI2_HUMAN Enoyl-CoA delta isomerase 2, mitochondrial OS=Homo sapiens OX=9606 GN=ECI2 PE=1 SV=4	|QATEGPC(BTD[C])NMPK	NA	NA	NA	NA	NA	NA	NA	NA	NA	NA	NA	NA	NA	NA	NA	NA	0.4	NA	NA	NA	0.82	NA	NA	NA	0.85	0.99	NA	NA	NA	NA	NA	NA	NA	NA	NA	0.34	NA	NA	NA	0.5	NA	NA	NA	NA	NA
O75530	126	EED	EED_HUMAN Polycomb protein EED OS=Homo sapiens OX=9606 GN=EED PE=1 SV=2	|VTLYEC(BTD[C])HSQGEIR	NA	2.05	1.11	NA	NA	1.7	NA	NA	NA	NA	NA	NA	NA	NA	NA	NA	0.71	0.87	NA	NA	NA	NA	NA	0.96	NA	NA	0.3	NA	NA	NA	NA	NA	NA	NA	NA	NA	NA	NA	NA	0.75	NA	NA	NA	NA	NA
O75530	254	EED	EED_HUMAN Polycomb protein EED OS=Homo sapiens OX=9606 GN=EED PE=1 SV=2	|IMSC(BTD[C])GMDHSLK	NA	NA	0.94	NA	0.59	NA	NA	NA	1.25	NA	NA	1.03	NA	NA	NA	1.01	NA	NA	NA	NA	1.18	NA	0.91	1.14	NA	1.5	NA	NA	NA	NA	NA	2.29	NA	NA	NA	NA	NA	NA	NA	NA	NA	NA	NA	NA	NA
O75530	182	EED	EED_HUMAN Polycomb protein EED OS=Homo sapiens OX=9606 GN=EED PE=1 SV=2	IINPITMQC(BTD[C])IK|	NA	NA	NA	NA	NA	NA	0.49	NA	NA	NA	NA	NA	NA	NA	NA	NA	NA	NA	NA	NA	NA	NA	NA	NA	NA	NA	NA	NA	NA	NA	NA	NA	NA	NA	NA	NA	NA	NA	NA	NA	NA	NA	NA	NA	NA
O75530	311	EED	EED_HUMAN Polycomb protein EED OS=Homo sapiens OX=9606 GN=EED PE=1 SV=2	|NYVDC(BTD[C])VR	NA	1.64	1.14	NA	NA	NA	NA	NA	NA	NA	NA	NA	NA	NA	NA	NA	0.56	NA	NA	NA	NA	NA	NA	NA	0.97	1.13	NA	NA	NA	NA	NA	NA	NA	NA	NA	NA	NA	NA	NA	NA	NA	NA	NA	NA	NA
O75531	77	BANF1	BAF_HUMAN Barrier-to-autointegration factor OS=Homo sapiens OX=9606 GN=BANF1 PE=1 SV=1	|DC(BTD[C])FGCLR	NA	NA	1.29	0.46	NA	NA	NA	NA	NA	NA	NA	1.38	0.79	NA	2.51	NA	0.9	NA	0.75	0.38	NA	1.78	NA	NA	1.04	NA	NA	0.27	NA	NA	NA	NA	NA	1.5	NA	NA	1.86	1.03	1.38	0.57	0.46	0.77	NA	0.74	0.42
O75531	80	BANF1	BAF_HUMAN Barrier-to-autointegration factor OS=Homo sapiens OX=9606 GN=BANF1 PE=1 SV=1	|DCFGC(BTD[C])LR	NA	1.56	0.99	0.66	NA	NA	NA	NA	NA	NA	0.74	1.06	1.83	1.92	2.41	1.05	NA	1.06	1.01	0.83	0.57	NA	NA	0.67	NA	NA	1.29	NA	2.29	NA	NA	NA	1.08	1.01	NA	NA	1.14	0.67	1.96	NA	0.7	0.45	0.62	0.81	0.71
O75531	67	BANF1	BAF_HUMAN Barrier-to-autointegration factor OS=Homo sapiens OX=9606 GN=BANF1 PE=1 SV=1	DTC(BTD[C])GANAK|DTC(BTD[C])GANAK	NA	NA	NA	0.33	NA	1.94	0.73	0.73	NA	NA	0.51	0.97	0.47	0.96	1.57	1.11	NA	1.07	0.46	0.27	0.82	2.97	NA	0.64	0.86	NA	NA	0.14	1.65	NA	0.86	NA	0.91	1.11	3.88	NA	NA	NA	1.26	0.6	NA	NA	NA	0.54	0.71
O75533	965	SF3B1	SF3B1_HUMAN Splicing factor 3B subunit 1 OS=Homo sapiens OX=9606 GN=SF3B1 PE=1 SV=3	TC(BTD[C])QEEK|	NA	2.28	1.27	0.53	1.11	NA	0.73	0.89	0.64	0.77	0.82	1.62	1.3	NA	0.63	1.08	NA	1.54	1.52	0.98	NA	1.73	0.83	NA	1.05	0.93	NA	5.27	NA	NA	NA	NA	NA	NA	NA	NA	NA	NA	NA	0.71	NA	0.79	NA	0.84	0.71
O75533	1244	SF3B1	SF3B1_HUMAN Splicing factor 3B subunit 1 OS=Homo sapiens OX=9606 GN=SF3B1 PE=1 SV=3	VAIGPC(BTD[C])R|	0.33	2.83	0.88	1.19	0.42	1.34	NA	0.4	1.16	0.58	0.54	0.86	5.85	NA	NA	0.88	0.72	1.05	1.77	1.87	0.87	2.54	1.32	1	0.81	0.93	1.77	NA	2.56	NA	NA	NA	NA	NA	NA	NA	NA	NA	NA	NA	NA	NA	NA	NA	NA
O75533	1035	SF3B1	SF3B1_HUMAN Splicing factor 3B subunit 1 OS=Homo sapiens OX=9606 GN=SF3B1 PE=1 SV=3	|VQENC(BTD[C])IDLVGR	0.68	1.56	0.98	0.6	0.95	NA	0.93	0.79	1.05	NA	0.82	1.22	0.76	NA	NA	1.07	0.77	1.17	0.44	0.42	1.12	1.03	NA	0.99	0.97	0.98	2.19	3.24	NA	0.31	NA	NA	1.07	NA	NA	NA	NA	0.51	0.93	0.37	0.43	0.75	0.71	0.53	0.46
O75533	1250	SF3B1	SF3B1_HUMAN Splicing factor 3B subunit 1 OS=Homo sapiens OX=9606 GN=SF3B1 PE=1 SV=3	MLQYC(BTD[C])LQGLFHPAR|	NA	NA	NA	NA	NA	NA	NA	NA	NA	NA	NA	NA	NA	NA	NA	NA	NA	NA	NA	NA	NA	NA	NA	1.1	NA	NA	NA	NA	NA	NA	NA	NA	NA	NA	NA	NA	NA	NA	NA	NA	NA	NA	NA	NA	NA
O75533	796	SF3B1	SF3B1_HUMAN Splicing factor 3B subunit 1 OS=Homo sapiens OX=9606 GN=SF3B1 PE=1 SV=3	|QCC(BTD[C])GTDGVEANYIK	NA	NA	NA	NA	NA	NA	NA	NA	NA	NA	NA	NA	NA	NA	NA	NA	NA	NA	NA	NA	NA	NA	NA	NA	NA	NA	NA	NA	NA	NA	NA	NA	NA	NA	NA	NA	NA	NA	NA	NA	NA	0.91	NA	NA	NA
O75534	739	CSDE1	CSDE1_HUMAN Cold shock domain-containing protein E1 OS=Homo sapiens OX=9606 GN=CSDE1 PE=1 SV=2	VC(BTD[C])EGPK|VC(BTD[C])EGPK	0.37	2.48	0.91	0.44	NA	1.26	0.67	0.54	0.92	0.52	0.89	0.95	0.72	NA	1.58	0.87	0.72	0.88	0.74	0.49	1.14	1.82	0.52	0.73	0.82	1.05	1.32	NA	NA	NA	NA	NA	NA	0.87	0.96	NA	0.97	NA	0.93	NA	NA	NA	NA	NA	0.95
O75534	506	CSDE1	CSDE1_HUMAN Cold shock domain-containing protein E1 OS=Homo sapiens OX=9606 GN=CSDE1 PE=1 SV=2	QRPGQQVATC(BTD[C])VR|	0.31	2.64	0.76	0.75	0.45	1.17	NA	NA	0.88	NA	NA	0.89	0.81	0.98	NA	0.96	0.61	1.03	1.33	0.69	0.97	2.2	NA	0.77	0.7	0.96	1.29	NA	NA	0.8	0.91	1.11	1.2	0.88	1.44	0.66	0.42	NA	1.27	1.01	NA	NA	NA	NA	NA
O75534	680	CSDE1	CSDE1_HUMAN Cold shock domain-containing protein E1 OS=Homo sapiens OX=9606 GN=CSDE1 PE=1 SV=2	ATVEC(BTD[C])VK|	NA	2.74	NA	NA	NA	1.02	NA	0.44	NA	NA	NA	1.43	NA	NA	NA	NA	NA	0.78	NA	NA	NA	1.83	NA	NA	0.98	NA	1.05	NA	NA	NA	NA	NA	NA	NA	NA	NA	NA	NA	NA	NA	NA	NA	NA	NA	NA
O75534	464	CSDE1	CSDE1_HUMAN Cold shock domain-containing protein E1 OS=Homo sapiens OX=9606 GN=CSDE1 PE=1 SV=2	|EKEAEDGIIAYDDC(BTD[C])GVK	NA	NA	NA	NA	NA	NA	NA	NA	NA	NA	NA	NA	NA	NA	NA	NA	NA	NA	NA	NA	NA	NA	NA	NA	NA	NA	NA	NA	NA	NA	NA	NA	NA	NA	NA	NA	NA	NA	NA	1.16	NA	NA	NA	NA	NA
O75534	365	CSDE1	CSDE1_HUMAN Cold shock domain-containing protein E1 OS=Homo sapiens OX=9606 GN=CSDE1 PE=1 SV=2	DGFGFIKC(BTD[C])VDR|	NA	NA	NA	NA	NA	NA	NA	NA	NA	NA	NA	1.06	NA	NA	NA	NA	NA	NA	NA	NA	NA	NA	NA	1.08	NA	NA	NA	NA	NA	NA	NA	NA	NA	NA	NA	NA	NA	NA	NA	NA	NA	NA	NA	NA	NA
O75534	42	CSDE1	CSDE1_HUMAN Cold shock domain-containing protein E1 OS=Homo sapiens OX=9606 GN=CSDE1 PE=1 SV=2	FIQC(BTD[C])SER|	NA	NA	NA	NA	NA	NA	NA	NA	NA	NA	NA	NA	NA	NA	NA	NA	NA	NA	NA	NA	NA	NA	NA	NA	NA	NA	NA	0.18	NA	NA	NA	NA	NA	NA	NA	NA	NA	0.94	NA	NA	NA	NA	NA	0.23	1
O75586	45	MED6	MED6_HUMAN Mediator of RNA polymerase II transcription subunit 6 OS=Homo sapiens OX=9606 GN=MED6 PE=1 SV=2	|TC(BTD[C])NNEVVK	NA	NA	NA	NA	NA	NA	0.67	NA	NA	NA	NA	1.21	0.68	NA	NA	NA	0.9	NA	NA	NA	0.94	NA	NA	NA	NA	NA	NA	NA	NA	NA	NA	NA	NA	NA	NA	NA	NA	NA	NA	NA	NA	NA	NA	NA	NA
O75592	1906	MYCBP2	MYCB2_HUMAN E3 ubiquitin-protein ligase MYCBP2 OS=Homo sapiens OX=9606 GN=MYCBP2 PE=1 SV=4	ANEEDKNC(BTD[C])SR|	NA	NA	NA	NA	NA	NA	NA	NA	0.68	NA	NA	NA	NA	NA	NA	NA	0.73	NA	NA	NA	NA	NA	NA	0.86	0.77	NA	NA	NA	NA	NA	NA	NA	NA	NA	NA	NA	NA	NA	NA	NA	NA	NA	NA	NA	NA
O75592	222	MYCBP2	MYCB2_HUMAN E3 ubiquitin-protein ligase MYCBP2 OS=Homo sapiens OX=9606 GN=MYCBP2 PE=1 SV=4	FSHPSLC(BTD[C])LR|	NA	NA	1.04	NA	NA	NA	NA	NA	NA	NA	NA	NA	NA	NA	NA	NA	NA	NA	NA	NA	NA	NA	NA	NA	1.09	NA	NA	NA	NA	NA	NA	NA	NA	NA	NA	NA	NA	NA	NA	NA	NA	NA	NA	NA	NA
O75600	106	GCAT	KBL_HUMAN 2-amino-3-ketobutyrate coenzyme A ligase, mitochondrial OS=Homo sapiens OX=9606 GN=GCAT PE=1 SV=1	FIC(BTD[C])GTQSIHK|	NA	NA	NA	0.49	NA	NA	NA	NA	NA	NA	0.99	NA	0.64	1.48	NA	NA	NA	NA	0.76	0.42	NA	NA	NA	NA	NA	NA	NA	0.28	NA	0.42	NA	2.47	NA	NA	NA	NA	NA	0.66	NA	0.61	NA	0.81	0.72	1.02	0.61
O75603	454	GCM2	GCM2_HUMAN Chorion-specific transcription factor GCMb OS=Homo sapiens OX=9606 GN=GCM2 PE=1 SV=1	|IAGDC(BTD[C])R	NA	NA	NA	0.4	NA	NA	NA	NA	1.08	NA	0.89	NA	0.67	NA	NA	NA	NA	NA	0.63	0.41	NA	NA	NA	NA	NA	NA	NA	NA	NA	NA	NA	NA	NA	NA	NA	NA	NA	NA	NA	NA	NA	NA	NA	NA	NA
O75607	79	NPM3	NPM3_HUMAN Nucleoplasmin-3 OS=Homo sapiens OX=9606 GN=NPM3 PE=1 SV=3	DEC(BTD[C])NVVEVVAR|	NA	NA	NA	NA	NA	NA	NA	NA	NA	NA	NA	NA	NA	NA	NA	NA	NA	NA	NA	NA	1.07	NA	NA	1.07	1.24	NA	NA	NA	NA	NA	NA	NA	NA	NA	NA	NA	NA	NA	NA	NA	NA	NA	NA	NA	NA
O75608	53	LYPLA1	LYPA1_HUMAN Acyl-protein thioesterase 1 OS=Homo sapiens OX=9606 GN=LYPLA1 PE=1 SV=1	YIC(BTD[C])PHAPVR|	NA	NA	NA	NA	NA	NA	NA	NA	NA	NA	NA	NA	NA	NA	NA	NA	NA	NA	NA	NA	0.83	NA	NA	1.16	NA	NA	NA	NA	NA	NA	NA	NA	NA	NA	NA	NA	NA	NA	NA	NA	NA	NA	NA	NA	NA
O75643	502	SNRNP200	U520_HUMAN U5 small nuclear ribonucleoprotein 200 kDa helicase OS=Homo sapiens OX=9606 GN=SNRNP200 PE=1 SV=2	AALETDENLLLC(BTD[C])APTGAGK|	0.88	2.03	NA	0.51	0.68	NA	NA	0.77	1.18	0.58	NA	1.48	0.63	NA	NA	1.34	0.6	1.66	NA	NA	0.94	1.95	1.01	0.91	1.03	1.03	NA	NA	NA	NA	NA	NA	NA	NA	NA	NA	NA	NA	NA	NA	NA	0.49	0.49	0.69	NA
O75643	1592	SNRNP200	U520_HUMAN U5 small nuclear ribonucleoprotein 200 kDa helicase OS=Homo sapiens OX=9606 GN=SNRNP200 PE=1 SV=2	|FLHC(BTD[C])TEK	0.43	2.12	1.25	0.47	0.59	1.76	NA	0.78	1.31	NA	1.01	1.2	NA	NA	NA	1.34	0.76	1.59	0.76	NA	1.09	1.84	NA	1.11	1.07	1.3	4.01	NA	NA	NA	NA	NA	NA	1.05	1.6	NA	0.76	NA	NA	0.71	NA	0.39	NA	0.63	NA
O75643	1115	SNRNP200	U520_HUMAN U5 small nuclear ribonucleoprotein 200 kDa helicase OS=Homo sapiens OX=9606 GN=SNRNP200 PE=1 SV=2	TLNLC(BTD[C])K|	NA	NA	1.04	0.43	0.44	NA	0.62	0.55	1.11	NA	0.97	1.37	NA	1.31	NA	NA	0.53	NA	0.7	NA	1.03	NA	NA	0.99	0.91	1	NA	1.14	2.71	NA	NA	2.03	1.33	NA	NA	0.08	NA	NA	NA	NA	0.72	1.02	NA	0.69	NA
O75643	428	SNRNP200	U520_HUMAN U5 small nuclear ribonucleoprotein 200 kDa helicase OS=Homo sapiens OX=9606 GN=SNRNP200 PE=1 SV=2	RC(BTD[C])QLPDGSFR|RC(BTD[C])QLPDGSFR	0.45	1.62	0.89	0.44	0.57	1.14	0.64	NA	1.04	NA	1.34	0.87	0.66	0.88	0.9	0.87	0.77	0.93	0.8	NA	0.77	2.04	0.62	0.87	0.69	0.93	0.95	NA	NA	0.92	0.79	NA	0.96	0.88	0.99	0.53	0.66	0.69	0.82	0.61	NA	0.66	1.08	1.08	0.56
O75643	1127	SNRNP200	U520_HUMAN U5 small nuclear ribonucleoprotein 200 kDa helicase OS=Homo sapiens OX=9606 GN=SNRNP200 PE=1 SV=2	|MWQSMC(BTD[C])PLR	0.62	NA	NA	NA	0.63	NA	1.06	NA	NA	NA	NA	NA	NA	NA	NA	NA	NA	NA	NA	NA	NA	NA	0.97	NA	NA	NA	NA	NA	NA	NA	NA	NA	NA	NA	NA	NA	NA	NA	NA	NA	NA	NA	NA	NA	NA
O75643	769	SNRNP200	U520_HUMAN U5 small nuclear ribonucleoprotein 200 kDa helicase OS=Homo sapiens OX=9606 GN=SNRNP200 PE=1 SV=2	TEAEQC(BTD[C])K|	NA	3.73	NA	0.51	NA	NA	NA	NA	NA	NA	NA	1.35	NA	NA	NA	1.24	0.79	3.4	1.14	0.41	1.13	NA	NA	0.99	1.12	1.16	NA	0.33	NA	NA	NA	NA	NA	NA	NA	NA	NA	NA	NA	NA	0.4	NA	NA	NA	NA
O75643	516	SNRNP200	U520_HUMAN U5 small nuclear ribonucleoprotein 200 kDa helicase OS=Homo sapiens OX=9606 GN=SNRNP200 PE=1 SV=2	|TNVALMC(BTD[C])MLR	NA	NA	NA	NA	NA	NA	NA	NA	NA	NA	NA	NA	NA	NA	NA	NA	0.58	NA	NA	NA	NA	NA	NA	0.7	0.81	1.21	NA	NA	NA	NA	NA	NA	NA	NA	NA	NA	NA	NA	NA	NA	NA	NA	NA	NA	NA
O75643	588	SNRNP200	U520_HUMAN U5 small nuclear ribonucleoprotein 200 kDa helicase OS=Homo sapiens OX=9606 GN=SNRNP200 PE=1 SV=2	|EEISATQIIVC(BTD[C])TPEK	NA	NA	NA	NA	NA	NA	NA	NA	NA	NA	NA	NA	NA	NA	NA	NA	NA	NA	NA	NA	NA	NA	NA	NA	NA	1.06	NA	NA	NA	NA	NA	NA	NA	NA	NA	NA	NA	NA	NA	NA	NA	NA	NA	NA	NA
O75643	576	SNRNP200	U520_HUMAN U5 small nuclear ribonucleoprotein 200 kDa helicase OS=Homo sapiens OX=9606 GN=SNRNP200 PE=1 SV=2	LATYGITVAELTGDHQLC(BTD[C])K|	NA	NA	NA	NA	NA	NA	NA	NA	NA	NA	NA	NA	NA	NA	NA	NA	NA	NA	NA	NA	NA	NA	NA	0.46	NA	NA	NA	NA	NA	NA	NA	NA	NA	NA	0.89	NA	0.8	NA	NA	NA	NA	NA	NA	NA	0.98
O75643	742	SNRNP200	U520_HUMAN U5 small nuclear ribonucleoprotein 200 kDa helicase OS=Homo sapiens OX=9606 GN=SNRNP200 PE=1 SV=2	|DMC(BTD[C])LEK	NA	NA	1.42	NA	NA	NA	NA	NA	NA	NA	NA	NA	NA	NA	NA	NA	NA	NA	NA	NA	NA	NA	NA	NA	0.78	NA	NA	0.1	NA	NA	NA	NA	NA	NA	NA	NA	NA	0.59	NA	0.39	NA	NA	NA	NA	0.56
O75643	1359	SNRNP200	U520_HUMAN U5 small nuclear ribonucleoprotein 200 kDa helicase OS=Homo sapiens OX=9606 GN=SNRNP200 PE=1 SV=2	TIC(BTD[C])AEFAILR|	NA	NA	NA	NA	NA	NA	NA	NA	NA	NA	NA	NA	NA	NA	NA	NA	NA	NA	NA	NA	NA	NA	NA	NA	NA	NA	NA	NA	NA	NA	NA	NA	NA	NA	NA	NA	NA	NA	NA	NA	NA	NA	NA	0.98	1.11
O75663	249	TIPRL	TIPRL_HUMAN TIP41-like protein OS=Homo sapiens OX=9606 GN=TIPRL PE=1 SV=2	EAVC(BTD[C])EK|	NA	NA	NA	NA	NA	NA	NA	NA	NA	NA	NA	NA	NA	NA	1.16	NA	NA	NA	NA	NA	NA	NA	NA	NA	NA	NA	NA	NA	NA	NA	NA	NA	NA	NA	NA	NA	NA	1.26	NA	NA	0.76	NA	NA	NA	NA
O75663	87	TIPRL	TIPRL_HUMAN TIP41-like protein OS=Homo sapiens OX=9606 GN=TIPRL PE=1 SV=2	VAC(BTD[C])AEEWQESR|	NA	NA	NA	NA	NA	NA	NA	NA	NA	NA	NA	NA	NA	NA	NA	NA	NA	NA	NA	NA	NA	NA	NA	0.99	1.1	NA	NA	NA	NA	NA	NA	NA	NA	NA	NA	NA	NA	0.95	NA	NA	NA	0.98	NA	NA	NA
O75683	19	SURF6	SURF6_HUMAN Surfeit locus protein 6 OS=Homo sapiens OX=9606 GN=SURF6 PE=1 SV=3	IC(BTD[C])SHSAPEQQAR|	NA	NA	NA	0.57	0.44	1.86	1.09	0.42	NA	0.48	NA	NA	NA	NA	NA	1.33	1.24	NA	NA	0.52	1.93	NA	0.93	1.09	1.25	0.94	NA	NA	NA	NA	NA	NA	NA	1.02	1.15	NA	NA	0.5	NA	0.64	0.54	1.16	NA	0.83	0.55
O75683	189	SURF6	SURF6_HUMAN Surfeit locus protein 6 OS=Homo sapiens OX=9606 GN=SURF6 PE=1 SV=3	KAEEATEAQEVVEATPEGAC(BTD[C])TEPR|	0.42	NA	NA	NA	NA	NA	NA	NA	NA	NA	NA	NA	NA	NA	NA	NA	NA	NA	NA	NA	NA	NA	NA	NA	1.02	NA	NA	NA	NA	NA	NA	NA	0.9	NA	NA	1.05	0.88	1.02	NA	0.86	0.71	0.86	NA	0.95	NA
O75688	209	PPM1B	PPM1B_HUMAN Protein phosphatase 1B OS=Homo sapiens OX=9606 GN=PPM1B PE=1 SV=1	ALGDYDYKC(BTD[C])VDGK|	NA	NA	NA	NA	NA	NA	NA	NA	NA	NA	NA	NA	NA	NA	NA	NA	NA	NA	NA	NA	1.09	NA	NA	NA	NA	NA	NA	NA	NA	NA	NA	NA	NA	NA	NA	NA	NA	NA	NA	NA	NA	NA	NA	NA	NA
O75688	172	PPM1B	PPM1B_HUMAN Protein phosphatase 1B OS=Homo sapiens OX=9606 GN=PPM1B PE=1 SV=1	NGQVCFSTQDHKPC(BTD[C])NPR|NGQVCFSTQDHKPC(BTD[C])NPR	NA	NA	NA	NA	NA	NA	NA	NA	NA	NA	NA	NA	NA	NA	NA	NA	NA	NA	NA	NA	NA	NA	NA	NA	NA	NA	NA	NA	NA	NA	NA	NA	NA	NA	NA	NA	NA	NA	NA	NA	NA	NA	NA	NA	NA
O75691	1851	UTP20	UTP20_HUMAN Small subunit processome component 20 homolog OS=Homo sapiens OX=9606 GN=UTP20 PE=1 SV=3	|VC(BTD[C])ALLK	NA	0.66	NA	0.51	NA	NA	NA	NA	NA	NA	NA	1.62	0.74	NA	NA	NA	0.81	NA	0.98	0.47	1.1	1.82	NA	0.99	0.92	1.4	NA	NA	NA	NA	NA	NA	NA	NA	NA	NA	NA	0.93	NA	0.67	NA	0.86	NA	1.08	0.64
O75691	811	UTP20	UTP20_HUMAN Small subunit processome component 20 homolog OS=Homo sapiens OX=9606 GN=UTP20 PE=1 SV=3	TDC(BTD[C])QER|	NA	NA	NA	NA	NA	NA	NA	NA	NA	NA	NA	NA	NA	NA	NA	NA	NA	1.12	NA	NA	NA	NA	NA	NA	NA	NA	NA	NA	NA	NA	NA	NA	NA	NA	NA	NA	NA	NA	NA	NA	NA	NA	NA	NA	NA
O75691	242	UTP20	UTP20_HUMAN Small subunit processome component 20 homolog OS=Homo sapiens OX=9606 GN=UTP20 PE=1 SV=3	NMFHSC(BTD[C])TGQAVK|NMFHSC(BTD[C])TGQAVK	NA	1.79	1.02	NA	NA	NA	NA	NA	NA	NA	NA	NA	NA	NA	NA	NA	NA	0.96	NA	NA	NA	NA	NA	NA	0.81	NA	NA	NA	NA	NA	NA	NA	NA	NA	NA	NA	NA	NA	NA	NA	NA	NA	NA	NA	NA
O75691	618	UTP20	UTP20_HUMAN Small subunit processome component 20 homolog OS=Homo sapiens OX=9606 GN=UTP20 PE=1 SV=3	LALCGC(BTD[C])K|	NA	NA	1.32	NA	NA	NA	NA	NA	NA	NA	NA	0.73	NA	NA	NA	1.05	1.44	0.72	NA	NA	0.73	0.37	NA	0.58	NA	NA	NA	NA	NA	NA	NA	NA	NA	NA	NA	NA	NA	NA	NA	NA	NA	NA	NA	NA	NA
O75691	345	UTP20	UTP20_HUMAN Small subunit processome component 20 homolog OS=Homo sapiens OX=9606 GN=UTP20 PE=1 SV=3	|IPTPADVC(BTD[C])K	NA	NA	NA	NA	NA	NA	NA	NA	NA	NA	1.39	NA	0.84	NA	NA	NA	NA	NA	NA	NA	NA	NA	NA	0.58	NA	NA	NA	NA	NA	NA	NA	NA	NA	NA	NA	NA	NA	NA	NA	NA	NA	NA	NA	NA	NA
O75691	616	UTP20	UTP20_HUMAN Small subunit processome component 20 homolog OS=Homo sapiens OX=9606 GN=UTP20 PE=1 SV=3	LALC(BTD[C])GCK|	NA	2.04	NA	NA	NA	NA	NA	NA	NA	NA	NA	NA	0.99	NA	NA	0.87	0.62	NA	NA	NA	0.65	NA	NA	0.74	NA	0.88	NA	NA	NA	NA	NA	NA	NA	NA	NA	NA	NA	NA	NA	NA	NA	NA	NA	NA	NA
O75691	1757	UTP20	UTP20_HUMAN Small subunit processome component 20 homolog OS=Homo sapiens OX=9606 GN=UTP20 PE=1 SV=3	ESEC(BTD[C])ITKPVSFLPQNK|	NA	NA	NA	NA	NA	NA	NA	NA	NA	NA	NA	NA	NA	NA	NA	0.86	NA	NA	NA	NA	NA	NA	NA	0.76	NA	NA	NA	NA	NA	NA	NA	NA	NA	NA	NA	NA	NA	NA	NA	NA	NA	NA	NA	NA	NA
O75691	313	UTP20	UTP20_HUMAN Small subunit processome component 20 homolog OS=Homo sapiens OX=9606 GN=UTP20 PE=1 SV=3	TNCC(BTD[C])ESSEQIKR|	NA	NA	NA	NA	NA	NA	NA	NA	NA	NA	NA	NA	NA	NA	NA	NA	NA	NA	NA	NA	NA	NA	NA	NA	NA	NA	NA	NA	NA	NA	NA	NA	NA	NA	2.34	NA	NA	NA	NA	NA	NA	NA	NA	NA	NA
O75691	312	UTP20	UTP20_HUMAN Small subunit processome component 20 homolog OS=Homo sapiens OX=9606 GN=UTP20 PE=1 SV=3	|TNC(BTD[C])CESSEQIKR	NA	NA	NA	NA	NA	NA	NA	NA	NA	NA	NA	NA	NA	NA	NA	NA	NA	NA	NA	NA	NA	NA	NA	NA	NA	NA	NA	NA	NA	NA	NA	NA	NA	0.98	NA	NA	NA	NA	NA	NA	NA	NA	NA	NA	NA
O75694	1344	NUP155	NU155_HUMAN Nuclear pore complex protein Nup155 OS=Homo sapiens OX=9606 GN=NUP155 PE=1 SV=1	YVENPSQVLNC(BTD[C])ER|	NA	0.77	NA	NA	NA	NA	NA	NA	NA	NA	NA	NA	NA	NA	NA	NA	0.93	NA	NA	NA	NA	NA	NA	NA	NA	0.81	NA	NA	NA	NA	NA	NA	NA	NA	NA	NA	NA	NA	NA	NA	0.93	NA	NA	NA	NA
O75717	773	WDHD1	WDHD1_HUMAN WD repeat and HMG-box DNA-binding protein 1 OS=Homo sapiens OX=9606 GN=WDHD1 PE=1 SV=1	MLALSC(BTD[C])K|	NA	NA	NA	NA	NA	NA	NA	NA	1.35	NA	NA	1.53	NA	NA	NA	1.22	0.75	1.39	NA	NA	NA	NA	NA	NA	0.84	NA	NA	NA	NA	NA	NA	NA	NA	NA	NA	NA	NA	NA	NA	NA	NA	NA	NA	NA	NA
O75717	1008	WDHD1	WDHD1_HUMAN WD repeat and HMG-box DNA-binding protein 1 OS=Homo sapiens OX=9606 GN=WDHD1 PE=1 SV=1	NVLSETPAIC(BTD[C])PPQNTENQRPK|NVLSETPAIC(BTD[C])PPQNTENQRPK	NA	4.09	0.83	NA	0.45	1.2	NA	0.51	1.03	NA	NA	0.78	NA	1.25	NA	NA	0.9	0.97	NA	NA	NA	2.62	0.58	0.9	0.76	1.16	1	NA	3.37	1.04	1.47	NA	0.88	0.9	1.24	0.85	1.18	0.94	0.97	0.84	0.62	NA	NA	0.95	0.61
O75717	60	WDHD1	WDHD1_HUMAN WD repeat and HMG-box DNA-binding protein 1 OS=Homo sapiens OX=9606 GN=WDHD1 PE=1 SV=1	AYSC(BTD[C])ALK|	NA	NA	NA	NA	NA	NA	NA	NA	NA	NA	NA	NA	NA	NA	NA	NA	NA	1.2	NA	NA	0.23	NA	NA	NA	NA	1.3	NA	NA	NA	NA	NA	NA	NA	NA	NA	NA	NA	NA	NA	NA	NA	NA	NA	NA	NA
O75717	156	WDHD1	WDHD1_HUMAN WD repeat and HMG-box DNA-binding protein 1 OS=Homo sapiens OX=9606 GN=WDHD1 PE=1 SV=1	DIFLASASC(BTD[C])DGSVR|	NA	NA	NA	NA	NA	NA	NA	NA	NA	NA	NA	NA	NA	NA	NA	NA	NA	NA	NA	NA	0.75	NA	NA	NA	NA	NA	NA	NA	NA	NA	NA	NA	NA	NA	NA	NA	NA	NA	NA	NA	NA	NA	NA	NA	NA
O75717	716	WDHD1	WDHD1_HUMAN WD repeat and HMG-box DNA-binding protein 1 OS=Homo sapiens OX=9606 GN=WDHD1 PE=1 SV=1	LPYC(BTD[C])QIATEK|	NA	1.89	NA	NA	NA	NA	NA	NA	NA	NA	NA	NA	NA	NA	NA	NA	NA	NA	NA	NA	NA	NA	NA	1.2	NA	NA	NA	NA	NA	NA	NA	NA	NA	NA	NA	NA	NA	NA	NA	NA	NA	NA	NA	NA	NA
O75717	662	WDHD1	WDHD1_HUMAN WD repeat and HMG-box DNA-binding protein 1 OS=Homo sapiens OX=9606 GN=WDHD1 PE=1 SV=1	|GLGNTWTPIC(BTD[C])NTR	NA	NA	NA	NA	NA	NA	NA	NA	NA	NA	NA	NA	NA	NA	NA	NA	NA	NA	NA	NA	NA	NA	NA	NA	NA	NA	NA	NA	NA	NA	NA	NA	NA	NA	NA	NA	NA	NA	NA	NA	NA	NA	NA	NA	NA
O75718	84	CRTAP	CRTAP_HUMAN Cartilage-associated protein OS=Homo sapiens OX=9606 GN=CRTAP PE=1 SV=1	|DSEAFC(BTD[C])HR	0.5	2.28	1.03	NA	NA	NA	0.95	NA	1.08	NA	NA	1.04	NA	NA	NA	1.07	1.23	NA	NA	NA	1.07	1.74	NA	1.02	1.03	1.27	NA	NA	NA	NA	NA	NA	NA	NA	NA	NA	NA	NA	NA	0.53	0.62	NA	NA	NA	NA
O75762	192	TRPA1	TRPA1_HUMAN Transient receptor potential cation channel subfamily A member 1 OS=Homo sapiens OX=9606 GN=TRPA1 PE=1 SV=3	GAKPC(BTD[C])K|	NA	NA	NA	NA	NA	NA	NA	NA	NA	NA	NA	NA	NA	NA	NA	NA	NA	NA	NA	NA	NA	NA	NA	NA	NA	NA	NA	NA	NA	NA	NA	NA	NA	NA	NA	NA	NA	NA	NA	NA	NA	NA	NA	NA	NA
O75764	191	TCEA3	TCEA3_HUMAN Transcription elongation factor A protein 3 OS=Homo sapiens OX=9606 GN=TCEA3 PE=1 SV=2	|C(BTD[C])VEMLSAALK	NA	NA	NA	NA	NA	NA	NA	0.73	NA	NA	NA	NA	NA	NA	NA	NA	NA	NA	NA	NA	NA	NA	NA	NA	NA	NA	NA	NA	NA	NA	NA	NA	NA	NA	NA	NA	NA	NA	NA	NA	NA	NA	NA	NA	NA
O75792	24	RNASEH2A	RNH2A_HUMAN Ribonuclease H2 subunit A OS=Homo sapiens OX=9606 GN=RNASEH2A PE=1 SV=2	|LSSPVPAVC(BTD[C])R	NA	NA	0.98	NA	NA	NA	NA	NA	NA	NA	NA	NA	1.18	NA	NA	NA	0.63	NA	NA	0.67	NA	NA	NA	NA	NA	NA	1.37	NA	NA	NA	NA	NA	NA	NA	NA	NA	NA	NA	NA	NA	NA	NA	0.43	NA	0.45
O75792	29	RNASEH2A	RNH2A_HUMAN Ribonuclease H2 subunit A OS=Homo sapiens OX=9606 GN=RNASEH2A PE=1 SV=2	KEPC(BTD[C])VLGVDEAGR|	NA	NA	NA	0.88	0.32	NA	0.59	0.54	NA	NA	NA	NA	NA	NA	NA	NA	NA	NA	NA	NA	1.26	NA	0.56	NA	1.41	NA	NA	NA	NA	NA	NA	NA	NA	NA	NA	NA	NA	NA	0.87	NA	NA	NA	NA	NA	NA
O75815	449	BCAR3	BCAR3_HUMAN Breast cancer anti-estrogen resistance protein 3 OS=Homo sapiens OX=9606 GN=BCAR3 PE=1 SV=1	LPSC(BTD[C])AQGSHTELLTAK|	NA	NA	NA	NA	NA	NA	NA	NA	NA	NA	NA	NA	NA	NA	NA	NA	NA	NA	NA	NA	NA	NA	NA	NA	NA	NA	NA	NA	NA	NA	NA	NA	NA	NA	NA	NA	NA	0.64	NA	NA	NA	NA	NA	NA	NA
O75818	17	RPP40	RPP40_HUMAN Ribonuclease P protein subunit p40 OS=Homo sapiens OX=9606 GN=RPP40 PE=1 SV=3	HLLVC(BTD[C])EK|	NA	NA	0.63	NA	NA	NA	NA	NA	NA	NA	NA	NA	NA	NA	NA	NA	NA	NA	NA	NA	0.75	NA	NA	0.96	NA	NA	NA	NA	NA	NA	NA	NA	NA	NA	NA	NA	NA	NA	NA	NA	NA	NA	NA	NA	NA
O75821	169	EIF3G	EIF3G_HUMAN Eukaryotic translation initiation factor 3 subunit G OS=Homo sapiens OX=9606 GN=EIF3G PE=1 SV=2	C(BTD[C])PYKDTLGPMQK|	NA	NA	NA	NA	NA	NA	NA	NA	NA	NA	NA	NA	NA	NA	NA	NA	NA	NA	NA	NA	NA	NA	NA	NA	NA	NA	NA	NA	NA	0.88	NA	NA	NA	NA	NA	NA	NA	NA	NA	NA	NA	NA	NA	NA	NA
O75821	25	EIF3G	EIF3G_HUMAN Eukaryotic translation initiation factor 3 subunit G OS=Homo sapiens OX=9606 GN=EIF3G PE=1 SV=2	PTGDFDSKPSWADQVEEEGEDDKC(BTD[C])VTSELLK|	NA	NA	NA	NA	NA	NA	1.33	NA	NA	NA	NA	1.38	NA	NA	NA	NA	1.41	NA	NA	NA	1.51	NA	NA	1.19	NA	1.6	NA	NA	NA	NA	NA	NA	NA	NA	NA	NA	NA	NA	NA	NA	NA	NA	NA	NA	NA
O75822	207	EIF3J	EIF3J_HUMAN Eukaryotic translation initiation factor 3 subunit J OS=Homo sapiens OX=9606 GN=EIF3J PE=1 SV=2	|ITNSLTVLC(BTD[C])SEK	0.59	1.64	NA	0.47	NA	0.84	0.54	0.48	NA	NA	0.78	1.08	0.77	0.96	1.15	0.92	1.01	NA	0.7	0.58	1.06	NA	0.45	NA	1.01	1.13	1.2	NA	1.18	0.81	NA	1.72	NA	0.89	1.09	NA	1.01	0.93	1.01	NA	0.77	0.68	NA	0.89	0.74
O75822	188	EIF3J	EIF3J_HUMAN Eukaryotic translation initiation factor 3 subunit J OS=Homo sapiens OX=9606 GN=EIF3J PE=1 SV=2	DVC(BTD[C])ISLEIDDLKK|	NA	NA	NA	NA	NA	NA	NA	NA	NA	NA	NA	NA	NA	NA	0.96	NA	0.6	NA	NA	NA	NA	NA	NA	NA	NA	NA	NA	NA	NA	NA	NA	NA	NA	NA	NA	NA	NA	0.28	NA	NA	NA	1.06	NA	NA	NA
O75828	227	CBR3	CBR3_HUMAN Carbonyl reductase [NADPH] 3 OS=Homo sapiens OX=9606 GN=CBR3 PE=1 SV=3	ILVNACC(BTD[C])PGPVK|	NA	NA	NA	NA	NA	NA	NA	NA	NA	NA	NA	NA	NA	NA	NA	NA	NA	NA	0.89	NA	NA	NA	NA	NA	NA	NA	NA	NA	NA	NA	NA	NA	NA	NA	NA	NA	NA	NA	NA	NA	NA	NA	NA	NA	NA
O75828	143	CBR3	CBR3_HUMAN Carbonyl reductase [NADPH] 3 OS=Homo sapiens OX=9606 GN=CBR3 PE=1 SV=3	VVNISSLQC(BTD[C])LR|	NA	NA	NA	NA	NA	NA	NA	NA	NA	NA	NA	0.82	NA	NA	NA	0.83	0.65	NA	NA	NA	0.77	1.3	NA	0.83	0.95	0.97	NA	NA	NA	NA	NA	NA	NA	NA	NA	NA	NA	NA	NA	NA	NA	NA	NA	NA	NA
O75832	107	PSMD10	PSD10_HUMAN 26S proteasome non-ATPase regulatory subunit 10 OS=Homo sapiens OX=9606 GN=PSMD10 PE=1 SV=1	GAQVNAVNQNGC(BTD[C])TPLHYAASK|	NA	NA	NA	NA	NA	NA	NA	NA	NA	NA	NA	NA	NA	NA	NA	NA	NA	NA	NA	NA	NA	NA	NA	NA	NA	NA	NA	NA	NA	NA	NA	NA	NA	NA	NA	NA	NA	NA	NA	NA	NA	NA	NA	NA	NA
O75843	539	AP1G2	AP1G2_HUMAN AP-1 complex subunit gamma-like 2 OS=Homo sapiens OX=9606 GN=AP1G2 PE=1 SV=1	|LC(BTD[C])GDNNR	NA	NA	NA	NA	NA	NA	NA	NA	NA	NA	NA	NA	NA	NA	2.64	NA	NA	NA	NA	NA	NA	NA	NA	NA	NA	NA	NA	NA	NA	NA	NA	NA	NA	NA	NA	NA	NA	NA	NA	NA	NA	NA	NA	NA	NA
O75845	285	SC5D	SC5D_HUMAN Lathosterol oxidase OS=Homo sapiens OX=9606 GN=SC5D PE=1 SV=2	SSHSGNGC(BTD[C])K|	NA	2.16	0.9	NA	NA	1.06	NA	NA	1.26	NA	NA	1.17	NA	NA	NA	0.84	1.24	1.13	NA	NA	1.95	NA	NA	NA	1.09	1.26	1.47	NA	NA	NA	NA	NA	NA	NA	NA	NA	NA	NA	NA	NA	NA	NA	NA	NA	NA
O75874	379	IDH1	IDHC_HUMAN Isocitrate dehydrogenase [NADP] cytoplasmic OS=Homo sapiens OX=9606 GN=IDH1 PE=1 SV=2	DLAAC(BTD[C])IK|	NA	NA	NA	0.51	NA	NA	0.68	0.67	NA	NA	0.91	1.19	NA	1.02	1.24	0.98	0.58	NA	NA	NA	1.54	NA	0.7	0.9	NA	NA	NA	NA	NA	NA	NA	NA	1.63	1	NA	NA	0.91	0.46	1.06	0.44	0.34	0.48	0.47	0.67	0.49
O75874	269	IDH1	IDHC_HUMAN Isocitrate dehydrogenase [NADP] cytoplasmic OS=Homo sapiens OX=9606 GN=IDH1 PE=1 SV=2	SEGGFIWAC(BTD[C])K|	NA	NA	NA	NA	NA	NA	NA	NA	NA	NA	NA	NA	NA	NA	NA	1.4	NA	NA	NA	NA	NA	NA	NA	NA	NA	NA	NA	NA	NA	NA	NA	NA	NA	NA	NA	NA	NA	1	NA	0.62	NA	NA	NA	NA	NA
O75874	73	IDH1	IDHC_HUMAN Isocitrate dehydrogenase [NADP] cytoplasmic OS=Homo sapiens OX=9606 GN=IDH1 PE=1 SV=2	C(BTD[C])ATITPDEK|	NA	NA	NA	NA	NA	NA	NA	NA	NA	NA	NA	NA	NA	NA	NA	NA	NA	NA	NA	NA	NA	NA	NA	NA	NA	NA	NA	NA	NA	NA	NA	NA	NA	NA	NA	NA	NA	NA	NA	NA	NA	NA	NA	NA	NA
O75884	39	RBBP9	RBBP9_HUMAN Serine hydrolase RBBP9 OS=Homo sapiens OX=9606 GN=RBBP9 PE=1 SV=2	|IPGFQC(BTD[C])LAK	0.35	2.21	0.63	0.66	NA	NA	0.72	0.57	NA	NA	NA	0.83	1.26	NA	NA	NA	0.73	0.81	0.81	0.71	1.03	1.06	0.63	1.01	0.85	1.08	NA	NA	NA	NA	NA	NA	NA	NA	NA	NA	NA	NA	1.13	NA	NA	0.82	NA	NA	NA
O75886	85	STAM2	STAM2_HUMAN Signal transducing adapter molecule 2 OS=Homo sapiens OX=9606 GN=STAM2 PE=1 SV=1	IFHLEVC(BTD[C])SR|	NA	NA	NA	NA	NA	1.12	NA	NA	1.21	NA	NA	1.22	NA	NA	NA	NA	0.65	NA	0.74	0.58	1.04	1.27	NA	NA	NA	NA	1.24	NA	1.31	NA	NA	NA	NA	1.38	NA	NA	NA	0.69	1.43	NA	NA	0.62	NA	0.68	NA
O75891	662	ALDH1L1	AL1L1_HUMAN Cytosolic 10-formyltetrahydrofolate dehydrogenase OS=Homo sapiens OX=9606 GN=ALDH1L1 PE=1 SV=2	|SC(BTD[C])AISNVK	0.96	NA	NA	NA	0.72	NA	0.96	1.03	NA	NA	NA	NA	0.41	NA	1.83	NA	NA	NA	0.86	NA	NA	NA	NA	NA	NA	NA	NA	0.62	NA	NA	NA	NA	NA	1.17	2.39	NA	1.18	0.49	1.36	0.63	0.74	0.75	NA	0.91	0.61
O75891	707	ALDH1L1	AL1L1_HUMAN Cytosolic 10-formyltetrahydrofolate dehydrogenase OS=Homo sapiens OX=9606 GN=ALDH1L1 PE=1 SV=2	|GENC(BTD[C])IAAGR	0.65	NA	NA	NA	NA	NA	0.87	0.9	NA	NA	NA	NA	NA	NA	NA	NA	NA	NA	NA	NA	NA	NA	0.83	NA	NA	NA	NA	0.97	NA	NA	NA	NA	NA	NA	NA	NA	NA	NA	NA	NA	NA	NA	NA	NA	NA
O75909	113	CCNK	CCNK_HUMAN Cyclin-K OS=Homo sapiens OX=9606 GN=CCNK PE=1 SV=2	VEETPKKC(BTD[C])K|	NA	NA	NA	NA	NA	NA	NA	NA	NA	NA	NA	NA	NA	NA	NA	NA	NA	NA	NA	NA	NA	NA	NA	NA	NA	NA	NA	NA	NA	NA	NA	NA	NA	NA	NA	NA	NA	NA	NA	NA	NA	NA	NA	NA	NA
O75914	424	PAK3	PAK3_HUMAN Serine/threonine-protein kinase PAK 3 OS=Homo sapiens OX=9606 GN=PAK3 PE=1 SV=2	LTDFGFC(BTD[C])AQITPEQSK|	NA	NA	NA	NA	NA	NA	NA	NA	NA	NA	NA	NA	NA	NA	NA	NA	NA	NA	NA	NA	NA	NA	NA	NA	NA	NA	NA	NA	NA	NA	NA	NA	NA	NA	NA	NA	NA	0.66	NA	NA	NA	NA	NA	NA	NA
O75923	1491	DYSF	DYSF_HUMAN Dysferlin OS=Homo sapiens OX=9606 GN=DYSF PE=1 SV=1	EKC(BTD[C])GSYLEK|	NA	NA	NA	NA	NA	1.22	NA	NA	0.65	NA	NA	0.88	NA	NA	1.32	1.09	0.98	NA	NA	NA	1.09	NA	NA	NA	1.08	2.14	NA	NA	3.37	NA	NA	NA	NA	0.67	1.04	NA	0.82	0.72	0.86	NA	NA	0.93	NA	NA	0.72
O75923	1420	DYSF	DYSF_HUMAN Dysferlin OS=Homo sapiens OX=9606 GN=DYSF PE=1 SV=1	RPVVGQC(BTD[C])TIR|	NA	2.3	0.83	NA	0.36	1.22	NA	0.36	1.06	NA	NA	0.94	0.93	0.98	1.31	0.94	0.68	1.04	NA	0.65	0.99	2.35	0.47	0.91	0.74	1.13	1.26	NA	2.41	0.48	NA	1.41	1.16	0.92	1.02	NA	1.05	0.92	0.93	NA	0.76	0.72	1.24	0.91	0.62
O75923	382	DYSF	DYSF_HUMAN Dysferlin OS=Homo sapiens OX=9606 GN=DYSF PE=1 SV=1	|GAHFC(BTD[C])LK	NA	NA	NA	NA	NA	NA	NA	NA	NA	NA	NA	NA	NA	NA	1.36	NA	0.58	NA	NA	NA	NA	NA	NA	NA	NA	NA	NA	NA	NA	NA	NA	NA	NA	NA	NA	NA	NA	NA	NA	NA	NA	NA	NA	NA	NA
O75923	824	DYSF	DYSF_HUMAN Dysferlin OS=Homo sapiens OX=9606 GN=DYSF PE=1 SV=1	GANYC(BTD[C])GK|	NA	NA	NA	NA	NA	NA	NA	NA	NA	NA	NA	NA	NA	NA	NA	0.77	NA	NA	NA	NA	NA	NA	NA	NA	1.05	NA	NA	NA	NA	NA	NA	NA	NA	NA	NA	NA	NA	NA	NA	NA	NA	NA	NA	NA	NA
O75934	132	BCAS2	SPF27_HUMAN Pre-mRNA-splicing factor SPF27 OS=Homo sapiens OX=9606 GN=BCAS2 PE=1 SV=1	IENLELMSQHGC(BTD[C])NAWK|	NA	NA	NA	NA	NA	NA	NA	NA	NA	NA	NA	NA	NA	NA	NA	NA	NA	NA	NA	NA	NA	NA	NA	NA	NA	NA	NA	NA	NA	NA	NA	NA	NA	1.07	NA	NA	NA	NA	NA	NA	NA	NA	NA	NA	NA
O75940	214	SMNDC1	SPF30_HUMAN Survival of motor neuron-related-splicing factor 30 OS=Homo sapiens OX=9606 GN=SMNDC1 PE=1 SV=1	VGVGTC(BTD[C])GIADKPMTQYQDTSK|	NA	1.73	0.7	NA	NA	NA	NA	NA	NA	NA	NA	0.94	NA	NA	NA	0.86	0.76	NA	0.96	0.73	0.8	NA	NA	0.81	0.71	0.75	0.91	NA	3.42	NA	NA	1.67	1.19	0.95	NA	0.81	0.67	0.95	0.92	1	0.71	NA	NA	0.78	NA
O75947	101	ATP5PD	ATP5H_HUMAN ATP synthase subunit d, mitochondrial OS=Homo sapiens OX=9606 GN=ATP5PD PE=1 SV=3	SC(BTD[C])AEWVSLSK|SC(BTD[C])AEWVSLSK	NA	NA	NA	0.41	NA	NA	NA	NA	NA	NA	0.83	NA	0.68	NA	NA	NA	1.01	NA	0.67	0.31	NA	NA	NA	NA	NA	0.64	NA	NA	NA	NA	NA	NA	NA	0.88	1.03	NA	NA	NA	NA	1.04	1.09	0.79	NA	1.24	0.8
O75954	190	TSPAN9	TSN9_HUMAN Tetraspanin-9 OS=Homo sapiens OX=9606 GN=TSPAN9 PE=1 SV=1	|TGC(BTD[C])YEK	NA	NA	0.71	0.92	NA	NA	NA	NA	NA	NA	NA	1.07	NA	NA	1.53	0.98	NA	NA	NA	0.95	1	NA	NA	NA	0.9	1.13	1.99	NA	NA	NA	NA	NA	NA	NA	NA	NA	NA	NA	NA	NA	NA	NA	NA	NA	NA
O75955	34	FLOT1	FLOT1_HUMAN Flotillin-1 OS=Homo sapiens OX=9606 GN=FLOT1 PE=1 SV=3	|VLPC(BTD[C])IQQIQR	NA	NA	NA	NA	NA	NA	NA	NA	NA	NA	NA	NA	NA	NA	NA	NA	NA	NA	NA	NA	NA	NA	NA	NA	NA	NA	NA	NA	NA	NA	NA	NA	NA	NA	NA	NA	NA	NA	NA	NA	NA	NA	NA	NA	NA
O75956	116	CDK2AP2	CDKA2_HUMAN Cyclin-dependent kinase 2-associated protein 2 OS=Homo sapiens OX=9606 GN=CDK2AP2 PE=1 SV=1	EC(BTD[C])LAETER|	NA	NA	NA	0.35	NA	NA	NA	NA	NA	NA	NA	NA	NA	NA	NA	NA	NA	NA	NA	0.3	NA	NA	NA	NA	NA	NA	NA	NA	NA	NA	NA	NA	NA	NA	NA	NA	NA	0.55	NA	NA	NA	NA	NA	0.78	NA
O75962	1220	TRIO	TRIO_HUMAN Triple functional domain protein OS=Homo sapiens OX=9606 GN=TRIO PE=1 SV=2	KC(BTD[C])VTAVDK|	NA	NA	NA	NA	NA	NA	NA	NA	1.27	NA	NA	NA	NA	NA	NA	1.03	NA	NA	NA	NA	NA	2.11	NA	NA	NA	NA	3.33	NA	NA	1.13	NA	NA	NA	NA	NA	NA	NA	NA	NA	NA	NA	NA	NA	NA	NA
O75962	2142	TRIO	TRIO_HUMAN Triple functional domain protein OS=Homo sapiens OX=9606 GN=TRIO PE=1 SV=2	|RC(BTD[C])NDMMNVGR	NA	NA	NA	NA	NA	NA	NA	NA	NA	NA	NA	NA	NA	NA	1.12	NA	0.99	NA	NA	NA	NA	NA	NA	0.54	1.17	1.3	NA	NA	NA	NA	NA	NA	NA	NA	NA	NA	NA	NA	NA	NA	NA	NA	NA	NA	NA
O75962	2909	TRIO	TRIO_HUMAN Triple functional domain protein OS=Homo sapiens OX=9606 GN=TRIO PE=1 SV=2	YLHNC(BTD[C])R|	NA	NA	NA	NA	NA	NA	NA	NA	NA	NA	NA	NA	NA	NA	NA	NA	NA	NA	NA	NA	NA	NA	NA	NA	0.72	NA	NA	NA	NA	NA	NA	NA	NA	NA	NA	NA	NA	NA	NA	NA	NA	NA	NA	NA	NA
O75970	297	MPDZ	MPDZ_HUMAN Multiple PDZ domain protein OS=Homo sapiens OX=9606 GN=MPDZ PE=1 SV=2	LC(BTD[C])SGDHILK|	NA	NA	NA	NA	NA	NA	NA	NA	NA	NA	NA	NA	NA	NA	NA	NA	NA	NA	NA	NA	NA	NA	NA	NA	NA	NA	NA	NA	NA	NA	NA	NA	NA	NA	NA	NA	NA	NA	NA	NA	NA	NA	NA	NA	NA
O75976	720	CPD	CBPD_HUMAN Carboxypeptidase D OS=Homo sapiens OX=9606 GN=CPD PE=1 SV=2	ENSQMFQGRPC(BTD[C])K|	NA	NA	0.74	NA	0.53	NA	0.39	0.22	NA	NA	NA	0.77	NA	0.74	1.21	0.8	0.92	NA	NA	NA	1.13	NA	NA	0.93	0.65	1.08	NA	NA	NA	NA	NA	1.35	0.93	0.65	1.05	NA	NA	NA	0.85	NA	NA	NA	NA	0.66	NA
O75976	1049	CPD	CBPD_HUMAN Carboxypeptidase D OS=Homo sapiens OX=9606 GN=CPD PE=1 SV=2	AQEKDC(BTD[C])TSK|	0.34	NA	0.65	NA	0.33	1.68	0.91	0.54	0.53	NA	1.02	0.72	0.97	NA	0.83	0.78	0.56	0.89	NA	0.68	0.93	2.11	0.49	0.6	0.6	0.98	1.02	2.16	NA	NA	NA	NA	0.83	NA	NA	NA	0.68	0.96	NA	1.1	NA	0.69	2.25	0.84	NA
O76003	146	GLRX3	GLRX3_HUMAN Glutaredoxin-3 OS=Homo sapiens OX=9606 GN=GLRX3 PE=1 SV=2	LTHAAPC(BTD[C])MLFMK|	NA	1.79	0.94	NA	0.59	1.28	0.81	0.98	1.24	0.64	NA	1.06	NA	NA	1.63	0.97	1.19	0.94	NA	NA	1.08	1.05	NA	1.02	0.99	1.29	2.78	NA	1.22	NA	NA	NA	NA	NA	NA	NA	NA	NA	NA	NA	NA	NA	NA	NA	NA
O76003	229	GLRX3	GLRX3_HUMAN Glutaredoxin-3 OS=Homo sapiens OX=9606 GN=GLRX3 PE=1 SV=2	ELEASEELDTIC(BTD[C])PK|	NA	NA	NA	NA	NA	NA	NA	NA	NA	NA	NA	2.47	NA	NA	NA	NA	NA	NA	NA	NA	NA	NA	NA	NA	1.49	NA	NA	NA	NA	NA	NA	NA	NA	NA	NA	NA	NA	NA	NA	NA	NA	NA	NA	NA	NA
O76021	47	RSL1D1	RL1D1_HUMAN Ribosomal L1 domain-containing protein 1 OS=Homo sapiens OX=9606 GN=RSL1D1 PE=1 SV=3	AVDALLTHC(BTD[C])K|AVDALLTHC(BTD[C])K	NA	2.41	1.27	0.58	0.57	1.29	NA	0.67	1.13	0.71	0.86	1.61	0.84	1.04	1.39	1.23	NA	1.28	0.8	NA	1.04	2.08	0.64	1.29	0.87	0.99	2.8	NA	1.52	0.29	0.2	1.5	0.91	0.94	1.46	0.49	1.31	NA	1.1	0.41	0.35	NA	0.77	0.8	NA
O76021	96	RSL1D1	RL1D1_HUMAN Ribosomal L1 domain-containing protein 1 OS=Homo sapiens OX=9606 GN=RSL1D1 PE=1 SV=3	SDSEDIC(BTD[C])LFTK|	NA	NA	1.47	NA	0.8	NA	0.94	0.82	NA	0.42	NA	1.61	NA	NA	NA	NA	0.88	NA	NA	NA	1.04	NA	NA	NA	0.98	NA	NA	NA	NA	NA	NA	NA	NA	NA	NA	NA	NA	NA	NA	NA	NA	0.6	NA	0.71	0.8
O76021	197	RSL1D1	RL1D1_HUMAN Ribosomal L1 domain-containing protein 1 OS=Homo sapiens OX=9606 GN=RSL1D1 PE=1 SV=3	|EINDC(BTD[C])IGGTVLNISK	NA	NA	1.16	NA	0.6	NA	NA	NA	1.35	NA	NA	1.5	NA	NA	NA	1.42	0.73	1.4	NA	NA	1.06	2.04	NA	1.18	0.95	0.93	NA	NA	NA	NA	NA	NA	NA	NA	NA	NA	NA	NA	NA	0.48	0.43	0.58	NA	0.93	NA
O76021	211	RSL1D1	RL1D1_HUMAN Ribosomal L1 domain-containing protein 1 OS=Homo sapiens OX=9606 GN=RSL1D1 PE=1 SV=3	SGSC(BTD[C])SAIR|SGSC(BTD[C])SAIR	0.36	3.33	0.8	0.56	0.3	1.34	0.47	0.31	0.96	NA	NA	0.88	0.69	1.06	1.66	0.97	0.47	0.99	0.82	0.41	0.67	2.61	0.45	1.06	0.68	0.72	1.88	0.54	2.99	0.71	1.08	1.33	NA	1.17	1.94	0.5	NA	0.34	1.58	0.66	0.67	0.31	NA	0.62	1.14
O76024	148	WFS1	WFS1_HUMAN Wolframin OS=Homo sapiens OX=9606 GN=WFS1 PE=1 SV=2	RC(BTD[C])LADR|	NA	2.06	NA	NA	NA	2.14	NA	1.31	NA	NA	NA	1.46	NA	NA	NA	1.27	0.81	NA	NA	NA	1.11	NA	NA	0.91	1.04	NA	NA	NA	NA	NA	NA	NA	NA	NA	NA	NA	NA	NA	NA	NA	NA	NA	NA	NA	NA
O76031	127	CLPX	CLPX_HUMAN ATP-dependent Clp protease ATP-binding subunit clpX-like, mitochondrial OS=Homo sapiens OX=9606 GN=CLPX PE=1 SV=2	|FVKC(BTD[C])EK	NA	NA	NA	NA	NA	NA	NA	NA	NA	NA	NA	NA	NA	NA	NA	NA	NA	NA	NA	NA	NA	NA	NA	NA	NA	NA	NA	NA	NA	NA	NA	NA	NA	NA	NA	NA	NA	NA	NA	NA	0.52	NA	NA	NA	NA
O76071	212	CIAO1	CIAO1_HUMAN Probable cytosolic iron-sulfur protein assembly protein CIAO1 OS=Homo sapiens OX=9606 GN=CIAO1 PE=1 SV=1	|LASC(BTD[C])SDDR	NA	NA	NA	NA	NA	NA	NA	NA	NA	NA	NA	NA	NA	NA	NA	0.96	NA	NA	NA	NA	NA	NA	NA	NA	NA	NA	NA	NA	NA	NA	NA	NA	NA	NA	NA	NA	NA	NA	NA	NA	NA	NA	NA	NA	NA
O76076	117	WISP2	WISP2_HUMAN WNT1-inducible-signaling pathway protein 2 OS=Homo sapiens OX=9606 GN=WISP2 PE=1 SV=1	|PHC(BTD[C])SLR	0.26	NA	NA	NA	0.54	NA	NA	0.54	NA	NA	NA	NA	NA	1.1	NA	NA	1.01	NA	NA	NA	0.91	NA	NA	NA	0.86	NA	NA	NA	NA	NA	NA	NA	NA	0.9	0.69	NA	1.02	NA	NA	NA	NA	NA	NA	0.95	NA
O76094	50	SRP72	SRP72_HUMAN Signal recognition particle subunit SRP72 OS=Homo sapiens OX=9606 GN=SRP72 PE=1 SV=3	|DDVTALHC(BTD[C])K	0.61	2.34	1.15	NA	NA	NA	NA	0.44	1.03	NA	NA	1.34	0.87	NA	2.6	2.04	1.08	1.12	NA	2.57	1.31	NA	NA	1.1	1.17	1.27	NA	NA	NA	0.99	NA	4.59	NA	NA	1.41	NA	NA	NA	NA	1.05	0.8	NA	1.27	0.95	0.98
O76094	87	SRP72	SRP72_HUMAN Signal recognition particle subunit SRP72 OS=Homo sapiens OX=9606 GN=SRP72 PE=1 SV=3	|AYC(BTD[C])EYR	NA	1.92	0.95	NA	0.81	NA	NA	0.76	NA	NA	NA	1.11	NA	NA	NA	1.07	NA	NA	NA	NA	1.12	NA	NA	0.87	NA	1.31	NA	NA	NA	NA	NA	NA	NA	NA	NA	NA	0.96	0.93	NA	NA	NA	NA	NA	NA	NA
O76094	54	SRP72	SRP72_HUMAN Signal recognition particle subunit SRP72 OS=Homo sapiens OX=9606 GN=SRP72 PE=1 SV=3	VVC(BTD[C])LIQNGSFK|	NA	NA	NA	0.65	NA	NA	0.65	NA	NA	NA	NA	NA	NA	NA	NA	NA	NA	NA	NA	NA	NA	NA	NA	NA	NA	1.15	NA	NA	NA	NA	NA	NA	NA	NA	NA	NA	NA	NA	NA	NA	NA	NA	NA	NA	NA
O76095	85	JTB	JTB_HUMAN Protein JTB OS=Homo sapiens OX=9606 GN=JTB PE=1 SV=1	ITC(BTD[C])SSSK|	NA	NA	NA	NA	NA	NA	NA	NA	NA	NA	NA	NA	NA	NA	NA	NA	NA	NA	NA	NA	0.96	NA	NA	NA	NA	NA	NA	NA	NA	NA	NA	NA	NA	NA	NA	NA	NA	NA	NA	NA	NA	NA	NA	NA	NA
O94763	44	URI1	RMP_HUMAN Unconventional prefoldin RPB5 interactor 1 OS=Homo sapiens OX=9606 GN=URI1 PE=1 SV=3	|VVTNC(BTD[C])QER	NA	NA	NA	0.45	NA	NA	NA	NA	NA	NA	NA	NA	1.1	NA	NA	NA	0.65	1.12	1.17	NA	1.03	NA	NA	NA	0.93	1.02	NA	NA	NA	NA	NA	NA	NA	NA	NA	NA	NA	NA	NA	NA	NA	NA	NA	NA	NA
O94768	190	STK17B	ST17B_HUMAN Serine/threonine-protein kinase 17B OS=Homo sapiens OX=9606 GN=STK17B PE=1 SV=1	IGHAC(BTD[C])ELR|	NA	NA	NA	NA	NA	NA	NA	NA	NA	NA	NA	NA	NA	NA	NA	NA	0.57	NA	NA	NA	NA	1.48	NA	NA	NA	NA	NA	NA	NA	NA	NA	NA	NA	NA	NA	NA	NA	NA	NA	NA	NA	NA	NA	NA	NA
O94776	209	MTA2	MTA2_HUMAN Metastasis-associated protein MTA2 OS=Homo sapiens OX=9606 GN=MTA2 PE=1 SV=1	|ALDC(BTD[C])SSSIR	NA	2.68	0.92	NA	NA	1.36	NA	NA	NA	0.54	0.68	1.04	1.02	NA	1.06	1.06	0.67	1.05	0.77	0.59	NA	2.26	NA	0.85	0.89	0.99	2.49	6.88	NA	NA	NA	2.22	1.26	NA	NA	NA	NA	0.51	0.95	NA	0.62	NA	1.36	0.73	0.64
O94776	495	MTA2	MTA2_HUMAN Metastasis-associated protein MTA2 OS=Homo sapiens OX=9606 GN=MTA2 PE=1 SV=1	AEC(BTD[C])SIR|AEC(BTD[C])SIR	NA	2.74	0.82	NA	0.45	1.23	0.65	NA	0.92	NA	1.03	0.99	0.9	0.88	1.25	0.9	0.89	0.93	0.82	0.43	NA	2.17	NA	0.65	0.81	0.96	1.64	1.65	2.25	NA	NA	NA	1.43	1.07	1.09	NA	0.53	0.42	0.89	NA	NA	0.44	NA	0.68	0.49
O94776	261	MTA2	MTA2_HUMAN Metastasis-associated protein MTA2 OS=Homo sapiens OX=9606 GN=MTA2 PE=1 SV=1	AMSTLVPQGGPVLC(BTD[C])R|AMSTLVPQGGPVLC(BTD[C])R	NA	1.7	0.75	NA	NA	NA	0.68	NA	NA	NA	NA	NA	0.88	NA	NA	0.82	0.69	NA	NA	NA	0.85	NA	0.65	1.13	0.79	1.08	NA	NA	NA	NA	NA	NA	0.96	NA	NA	NA	NA	NA	NA	NA	NA	NA	NA	NA	NA
O94776	44	MTA2	MTA2_HUMAN Metastasis-associated protein MTA2 OS=Homo sapiens OX=9606 GN=MTA2 PE=1 SV=1	VVC(BTD[C])LFR|VVC(BTD[C])LFR	NA	NA	NA	NA	NA	NA	NA	NA	NA	NA	NA	NA	NA	NA	NA	NA	NA	NA	NA	NA	NA	NA	NA	NA	NA	NA	NA	1.9	NA	NA	NA	NA	NA	NA	NA	NA	NA	0.44	NA	0.59	NA	NA	0.85	NA	0.49
O94804	722	STK10	STK10_HUMAN Serine/threonine-protein kinase 10 OS=Homo sapiens OX=9606 GN=STK10 PE=1 SV=1	EIC(BTD[C])DKER|	0.86	NA	NA	NA	NA	NA	NA	NA	NA	NA	NA	NA	NA	NA	NA	NA	NA	NA	NA	NA	NA	NA	0.81	NA	NA	NA	NA	NA	NA	NA	NA	NA	NA	NA	NA	0.94	0.85	NA	NA	NA	NA	NA	NA	NA	NA
O94804	138	STK10	STK10_HUMAN Serine/threonine-protein kinase 10 OS=Homo sapiens OX=9606 GN=STK10 PE=1 SV=1	GLTEPQIQVVC(BTD[C])R|	NA	NA	NA	NA	NA	NA	NA	NA	NA	NA	NA	NA	NA	NA	NA	NA	NA	NA	NA	NA	NA	NA	NA	NA	NA	NA	NA	NA	NA	NA	NA	NA	NA	NA	NA	NA	NA	NA	NA	NA	NA	NA	NA	NA	NA
O94808	226	GFPT2	GFPT2_HUMAN Glutamine--fructose-6-phosphate aminotransferase [isomerizing] 2 OS=Homo sapiens OX=9606 GN=GFPT2 PE=1 SV=3	TC(BTD[C])TLENVK|TC(BTD[C])TLENVK	0.63	NA	NA	NA	0.62	NA	0.76	0.86	NA	0.69	NA	0.93	NA	NA	NA	1.1	NA	0.96	NA	NA	NA	NA	0.74	NA	1.07	NA	0.7	NA	NA	NA	NA	NA	NA	NA	NA	NA	NA	NA	NA	NA	NA	NA	NA	NA	NA
O94808	599	GFPT2	GFPT2_HUMAN Glutamine--fructose-6-phosphate aminotransferase [isomerizing] 2 OS=Homo sapiens OX=9606 GN=GFPT2 PE=1 SV=3	DPC(BTD[C])FAK|	NA	NA	NA	NA	NA	NA	NA	NA	NA	NA	NA	NA	NA	NA	NA	1.19	0.99	NA	NA	NA	NA	NA	NA	NA	NA	NA	NA	NA	NA	NA	NA	NA	NA	NA	NA	NA	NA	NA	NA	NA	NA	NA	NA	0.66	NA
O94808	247	GFPT2	GFPT2_HUMAN Glutamine--fructose-6-phosphate aminotransferase [isomerizing] 2 OS=Homo sapiens OX=9606 GN=GFPT2 PE=1 SV=3	LDSSAC(BTD[C])LHAVGDK|	0.6	NA	NA	NA	0.64	NA	1.04	0.68	NA	NA	NA	NA	NA	NA	NA	NA	NA	NA	NA	NA	NA	NA	1.04	NA	NA	NA	NA	NA	NA	NA	NA	NA	NA	NA	NA	NA	NA	NA	1.07	NA	NA	NA	NA	NA	NA
O94808	621	GFPT2	GFPT2_HUMAN Glutamine--fructose-6-phosphate aminotransferase [isomerizing] 2 OS=Homo sapiens OX=9606 GN=GFPT2 PE=1 SV=3	PIILC(BTD[C])SK|	NA	NA	NA	NA	NA	NA	NA	NA	NA	NA	NA	NA	NA	NA	NA	NA	NA	NA	NA	0.45	NA	NA	NA	NA	NA	NA	NA	NA	NA	NA	NA	NA	NA	NA	NA	NA	NA	NA	NA	NA	NA	NA	NA	NA	NA
O94808	461	GFPT2	GFPT2_HUMAN Glutamine--fructose-6-phosphate aminotransferase [isomerizing] 2 OS=Homo sapiens OX=9606 GN=GFPT2 PE=1 SV=3	ETDC(BTD[C])GVHINAGPEIGVASTK|	NA	NA	NA	NA	NA	NA	NA	NA	NA	NA	NA	NA	NA	NA	NA	NA	NA	NA	NA	NA	NA	NA	NA	NA	NA	NA	NA	NA	NA	NA	NA	NA	NA	NA	NA	NA	NA	NA	NA	NA	NA	NA	0.76	NA	NA
O94810	212	RGS11	RGS11_HUMAN Regulator of G-protein signaling 11 OS=Homo sapiens OX=9606 GN=RGS11 PE=1 SV=2	GSC(BTD[C])AASR|	NA	NA	NA	NA	NA	NA	NA	NA	NA	NA	NA	NA	NA	NA	1.19	NA	NA	NA	NA	NA	NA	NA	NA	NA	NA	NA	NA	NA	NA	NA	NA	NA	NA	NA	NA	NA	NA	NA	NA	1.02	NA	NA	NA	NA	NA
O94817	134	ATG12	ATG12_HUMAN Ubiquitin-like protein ATG12 OS=Homo sapiens OX=9606 GN=ATG12 PE=1 SV=1	LVLHYC(BTD[C])K|	NA	NA	NA	NA	NA	NA	NA	NA	NA	NA	NA	1.14	NA	NA	NA	NA	NA	NA	NA	NA	NA	NA	NA	NA	NA	NA	NA	NA	NA	NA	NA	NA	NA	NA	NA	NA	NA	NA	NA	NA	NA	NA	NA	NA	NA
O94822	227	LTN1	LTN1_HUMAN E3 ubiquitin-protein ligase listerin OS=Homo sapiens OX=9606 GN=LTN1 PE=1 SV=6	VVTC(BTD[C])SLLALK|	NA	NA	NA	NA	NA	NA	NA	NA	NA	NA	NA	NA	NA	NA	NA	NA	NA	NA	NA	NA	1.01	NA	NA	NA	NA	NA	NA	NA	NA	NA	NA	NA	NA	NA	NA	NA	NA	NA	NA	NA	NA	NA	NA	NA	NA
O94826	317	TOMM70	TOM70_HUMAN Mitochondrial import receptor subunit TOM70 OS=Homo sapiens OX=9606 GN=TOMM70 PE=1 SV=1	|IISEC(BTD[C])SK	0.42	NA	1.1	0.56	NA	NA	0.5	0.49	1.14	NA	NA	NA	NA	0.85	1.22	0.97	NA	0.74	NA	1.02	NA	NA	0.47	0.67	NA	1.01	1.22	4.28	NA	NA	NA	NA	NA	NA	NA	NA	NA	0.66	0.94	0.51	0.53	0.73	NA	0.9	1.02
O94826	176	TOMM70	TOM70_HUMAN Mitochondrial import receptor subunit TOM70 OS=Homo sapiens OX=9606 GN=TOMM70 PE=1 SV=1	EVAQDC(BTD[C])TK|	NA	4.02	1.2	0.6	NA	2.05	NA	NA	NA	NA	NA	NA	1.15	NA	NA	0.81	NA	1.32	0.98	NA	0.91	NA	NA	0.85	1	NA	NA	NA	NA	NA	NA	NA	NA	NA	NA	NA	NA	NA	NA	NA	0.6	0.81	NA	NA	0.96
O94826	502	TOMM70	TOM70_HUMAN Mitochondrial import receptor subunit TOM70 OS=Homo sapiens OX=9606 GN=TOMM70 PE=1 SV=1	ADEMYDKC(BTD[C])IDLEPDNATTYVHK|	NA	NA	NA	NA	NA	NA	NA	0.87	NA	NA	NA	NA	NA	NA	NA	NA	NA	NA	NA	NA	1.36	NA	NA	NA	NA	NA	NA	NA	NA	NA	NA	NA	NA	NA	NA	NA	NA	NA	NA	NA	NA	NA	1.2	NA	0.62
O94826	588	TOMM70	TOM70_HUMAN Mitochondrial import receptor subunit TOM70 OS=Homo sapiens OX=9606 GN=TOMM70 PE=1 SV=1	SEMEMAHLYSLC(BTD[C])DAAHAQTEVAK|	NA	NA	NA	NA	NA	NA	NA	NA	NA	NA	NA	NA	NA	NA	NA	0.95	1.78	NA	NA	NA	NA	NA	NA	1.45	NA	NA	NA	NA	NA	NA	NA	NA	NA	NA	NA	NA	NA	NA	NA	NA	NA	NA	NA	NA	NA
O94851	150	MICAL2	MICA2_HUMAN [F-actin]-monooxygenase MICAL2 OS=Homo sapiens OX=9606 GN=MICAL2 PE=1 SV=1	FC(BTD[C])AGSIDHISIR|	NA	1.05	NA	NA	NA	NA	NA	NA	NA	NA	NA	NA	NA	NA	NA	NA	1.05	NA	NA	NA	1.29	1.64	NA	0.75	NA	NA	NA	NA	NA	NA	NA	NA	NA	NA	NA	NA	7.21	NA	NA	NA	NA	NA	NA	NA	NA
O94851	703	MICAL2	MICA2_HUMAN [F-actin]-monooxygenase MICAL2 OS=Homo sapiens OX=9606 GN=MICAL2 PE=1 SV=1	SLGSNQEC(BTD[C])GSSK|SLGSNQEC(BTD[C])GSSK	NA	NA	NA	NA	NA	NA	NA	NA	NA	NA	NA	0.91	NA	NA	NA	NA	0.64	NA	NA	NA	1.17	NA	NA	0.8	0.93	1.08	NA	NA	NA	NA	NA	NA	NA	NA	NA	NA	NA	NA	NA	NA	NA	NA	NA	NA	NA
O94851	552	MICAL2	MICA2_HUMAN [F-actin]-monooxygenase MICAL2 OS=Homo sapiens OX=9606 GN=MICAL2 PE=1 SV=1	SGLALC(BTD[C])AIIHR|	NA	NA	NA	NA	NA	NA	NA	NA	NA	NA	NA	NA	NA	NA	NA	NA	0.83	NA	NA	NA	NA	NA	NA	1.47	1.19	NA	NA	NA	NA	NA	NA	NA	NA	NA	NA	NA	NA	NA	NA	NA	NA	NA	NA	NA	NA
O94851	84	MICAL2	MICA2_HUMAN [F-actin]-monooxygenase MICAL2 OS=Homo sapiens OX=9606 GN=MICAL2 PE=1 SV=1	|SC(BTD[C])TNTK	NA	NA	NA	NA	NA	NA	NA	NA	NA	NA	NA	NA	NA	NA	NA	NA	NA	NA	NA	NA	NA	NA	NA	NA	NA	NA	NA	NA	NA	NA	NA	NA	NA	NA	NA	NA	NA	NA	NA	NA	NA	NA	NA	NA	1.06
O94855	573	SEC24D	SC24D_HUMAN Protein transport protein Sec24D OS=Homo sapiens OX=9606 GN=SEC24D PE=1 SV=2	|AADC(BTD[C])PGK	0.64	NA	0.81	0.77	0.43	1.49	0.6	1.16	NA	0.98	NA	0.86	1.31	NA	0.95	0.93	NA	NA	0.93	NA	1.15	NA	0.53	0.94	0.75	1.24	NA	NA	NA	NA	NA	NA	NA	NA	NA	NA	NA	NA	NA	NA	NA	NA	NA	NA	NA
O94855	462	SEC24D	SC24D_HUMAN Protein transport protein Sec24D OS=Homo sapiens OX=9606 GN=SEC24D PE=1 SV=2	LIC(BTD[C])EELK|	NA	NA	NA	NA	NA	NA	NA	NA	NA	NA	NA	NA	NA	NA	NA	NA	0.61	NA	1.08	NA	NA	NA	NA	NA	NA	NA	NA	NA	NA	NA	NA	NA	NA	NA	NA	NA	NA	NA	NA	NA	NA	NA	NA	NA	NA
O94855	853	SEC24D	SC24D_HUMAN Protein transport protein Sec24D OS=Homo sapiens OX=9606 GN=SEC24D PE=1 SV=2	NC(BTD[C])VLLSRPEISTDER|	NA	1.21	NA	NA	NA	NA	NA	NA	NA	NA	NA	1.12	NA	NA	NA	NA	NA	NA	NA	NA	NA	NA	NA	NA	NA	NA	NA	NA	NA	NA	NA	NA	NA	NA	NA	NA	NA	NA	NA	NA	NA	NA	NA	NA	NA
O94874	32	UFL1	UFL1_HUMAN E3 UFM1-protein ligase 1 OS=Homo sapiens OX=9606 GN=UFL1 PE=1 SV=2	|NC(BTD[C])IEIVNK	NA	NA	NA	NA	NA	NA	NA	NA	NA	NA	NA	1.2	NA	NA	NA	NA	NA	NA	NA	NA	NA	NA	NA	NA	NA	NA	NA	NA	NA	NA	NA	NA	NA	NA	NA	NA	NA	NA	NA	NA	NA	NA	NA	NA	NA
O94888	160	UBXN7	UBXN7_HUMAN UBX domain-containing protein 7 OS=Homo sapiens OX=9606 GN=UBXN7 PE=1 SV=2	|EC(BTD[C])GQMQNK	NA	NA	NA	NA	NA	NA	NA	NA	NA	NA	NA	NA	NA	NA	NA	NA	NA	NA	NA	NA	NA	NA	NA	NA	1.07	NA	NA	NA	NA	NA	NA	NA	NA	NA	NA	NA	NA	NA	NA	NA	NA	NA	NA	NA	NA
O94903	261	PLPBP	PLPHP_HUMAN Pyridoxal phosphate homeostasis protein OS=Homo sapiens OX=9606 GN=PLPBP PE=1 SV=1	KPTPDKC(BTD[C])AADVK|KPTPDKC(BTD[C])AADVK	0.7	NA	0.63	NA	0.28	1.22	0.46	0.31	0.87	NA	NA	0.57	NA	1.1	1.45	0.86	0.62	NA	NA	NA	0.73	NA	0.4	0.71	0.65	NA	0.71	NA	NA	1.71	1.11	1.23	NA	0.82	0.96	1.08	0.82	0.56	0.87	0.7	0.63	0.75	NA	0.75	0.51
O94905	262	ERLIN2	ERLN2_HUMAN Erlin-2 OS=Homo sapiens OX=9606 GN=ERLIN2 PE=1 SV=1	ADAEC(BTD[C])YTAMK|	NA	NA	NA	NA	NA	NA	NA	NA	NA	NA	NA	1.62	NA	NA	NA	1.08	0.89	1.36	NA	NA	0.95	NA	NA	0.97	NA	1.02	NA	NA	NA	NA	NA	NA	NA	NA	NA	NA	NA	NA	NA	NA	NA	NA	NA	NA	NA
O94906	604	PRPF6	PRP6_HUMAN Pre-mRNA-processing factor 6 OS=Homo sapiens OX=9606 GN=PRPF6 PE=1 SV=1	AVAHC(BTD[C])PK|AVAHC(BTD[C])PK	0.43	2.55	1.01	1.12	0.33	1.2	NA	0.38	1.28	0.75	NA	1.06	NA	NA	NA	0.92	0.91	1.05	NA	NA	1.05	2.6	0.44	0.97	0.87	1.12	1.78	NA	NA	0.56	1.48	NA	NA	NA	NA	0.44	NA	NA	NA	NA	NA	NA	NA	NA	NA
O94906	339	PRPF6	PRP6_HUMAN Pre-mRNA-processing factor 6 OS=Homo sapiens OX=9606 GN=PRPF6 PE=1 SV=1	|GTEMC(BTD[C])PK	NA	3.11	0.96	NA	0.5	NA	0.61	0.63	1.18	NA	NA	1.14	0.64	NA	NA	1.06	0.6	1.2	NA	NA	1.27	2.37	0.91	0.97	0.95	1.17	1.37	NA	2.59	NA	0.69	NA	0.78	NA	NA	NA	NA	0.98	NA	0.43	0.58	NA	NA	NA	NA
O94906	522	PRPF6	PRP6_HUMAN Pre-mRNA-processing factor 6 OS=Homo sapiens OX=9606 GN=PRPF6 PE=1 SV=1	AGSVATC(BTD[C])QAVMR|AGSVATC(BTD[C])QAVMR	NA	2.17	0.72	0.6	NA	1	0.38	NA	0.91	NA	NA	0.71	1.08	NA	NA	0.98	1.28	0.97	0.92	0.55	0.89	2.06	NA	1.12	1.07	0.85	1.78	NA	NA	NA	NA	NA	NA	NA	NA	0.38	NA	NA	NA	NA	NA	NA	NA	NA	NA
O94906	901	PRPF6	PRP6_HUMAN Pre-mRNA-processing factor 6 OS=Homo sapiens OX=9606 GN=PRPF6 PE=1 SV=1	|KRC(BTD[C])ESAEPR	0.23	2.35	0.54	NA	0.25	1.1	0.32	0.22	NA	NA	NA	NA	0.58	0.7	0.99	NA	0.61	NA	NA	0.51	1.02	NA	0.33	0.57	0.62	0.86	NA	NA	NA	NA	NA	NA	NA	NA	0.72	NA	NA	NA	0.81	0.84	NA	0.82	0.73	0.72	0.78
O94906	913	PRPF6	PRP6_HUMAN Pre-mRNA-processing factor 6 OS=Homo sapiens OX=9606 GN=PRPF6 PE=1 SV=1	HGELWC(BTD[C])AVSK|	NA	NA	0.77	NA	NA	NA	NA	0.27	NA	NA	NA	0.89	NA	NA	1.37	0.88	NA	NA	NA	NA	NA	NA	NA	NA	NA	0.82	NA	NA	NA	NA	NA	NA	NA	NA	NA	NA	1.02	NA	NA	NA	NA	NA	NA	NA	NA
O94906	698	PRPF6	PRP6_HUMAN Pre-mRNA-processing factor 6 OS=Homo sapiens OX=9606 GN=PRPF6 PE=1 SV=1	AAQDLC(BTD[C])EEALR|	NA	1.42	NA	NA	NA	NA	0.92	NA	NA	NA	NA	NA	NA	NA	NA	NA	0.83	NA	NA	NA	NA	NA	NA	1.1	0.99	NA	NA	NA	NA	NA	NA	NA	NA	NA	NA	NA	NA	NA	NA	NA	NA	NA	NA	NA	NA
O94906	837	PRPF6	PRP6_HUMAN Pre-mRNA-processing factor 6 OS=Homo sapiens OX=9606 GN=PRPF6 PE=1 SV=1	KC(BTD[C])EHDPHVLLAVAK|	NA	1.51	NA	NA	NA	NA	NA	NA	NA	NA	NA	NA	NA	NA	NA	NA	NA	NA	NA	NA	NA	NA	NA	NA	NA	NA	NA	NA	NA	NA	NA	NA	NA	NA	NA	NA	NA	NA	NA	NA	NA	NA	NA	NA	NA
O94915	372	FRYL	FRYL_HUMAN Protein furry homolog-like OS=Homo sapiens OX=9606 GN=FRYL PE=1 SV=2	IKC(BTD[C])ESNTVTQSR|IKC(BTD[C])ESNTVTQSR	NA	NA	NA	NA	NA	1.35	NA	NA	0.58	NA	NA	0.64	NA	NA	NA	NA	0.42	0.72	NA	NA	NA	NA	NA	NA	0.5	NA	1.26	NA	NA	NA	NA	NA	NA	NA	NA	NA	NA	NA	NA	NA	NA	NA	NA	NA	NA
O94915	1188	FRYL	FRYL_HUMAN Protein furry homolog-like OS=Homo sapiens OX=9606 GN=FRYL PE=1 SV=2	|VAAGC(BTD[C])FK	NA	2.31	NA	NA	NA	2.75	NA	NA	NA	NA	NA	NA	NA	NA	NA	4.1	1.45	NA	NA	NA	1.22	3.5	NA	NA	NA	1.25	2.03	NA	NA	NA	NA	NA	NA	NA	NA	NA	NA	NA	NA	NA	NA	NA	NA	NA	NA
O94915	288	FRYL	FRYL_HUMAN Protein furry homolog-like OS=Homo sapiens OX=9606 GN=FRYL PE=1 SV=2	NEVNVPC(BTD[C])LK|NEVNVPC(BTD[C])LK	NA	NA	NA	NA	NA	NA	NA	NA	NA	NA	NA	NA	NA	NA	1.46	NA	NA	NA	NA	NA	NA	NA	NA	NA	NA	0.81	NA	NA	NA	NA	NA	NA	1.56	0.97	1.04	NA	0.89	NA	1.51	NA	NA	NA	NA	NA	NA
O94923	3	GLCE	GLCE_HUMAN D-glucuronyl C5-epimerase OS=Homo sapiens OX=9606 GN=GLCE PE=1 SV=3	RC(BTD[C])LAAR|	NA	NA	NA	NA	NA	NA	NA	NA	NA	NA	NA	NA	NA	NA	1.37	NA	NA	NA	NA	NA	NA	NA	NA	NA	NA	NA	NA	NA	NA	NA	NA	NA	NA	1.05	1.24	NA	4.88	NA	NA	NA	NA	NA	NA	NA	NA
O94925	178	GLS	GLSK_HUMAN Glutaminase kidney isoform, mitochondrial OS=Homo sapiens OX=9606 GN=GLS PE=1 SV=1	LKEC(BTD[C])MDMLR|LKEC(BTD[C])MDMLR	NA	1.62	1.32	NA	NA	1.44	NA	0.73	1.5	NA	NA	1.39	NA	NA	NA	1.38	0.88	1.45	NA	NA	1.12	0.67	NA	1.22	1.05	1.07	NA	NA	NA	NA	NA	NA	NA	NA	NA	NA	0.81	NA	NA	NA	NA	NA	NA	NA	NA
O94925	283	GLS	GLSK_HUMAN Glutaminase kidney isoform, mitochondrial OS=Homo sapiens OX=9606 GN=GLS PE=1 SV=1	VPFC(BTD[C])LQSCVKPLK|	NA	NA	NA	NA	NA	NA	NA	NA	NA	NA	NA	NA	NA	NA	1.66	NA	NA	NA	NA	NA	NA	NA	NA	NA	NA	NA	NA	NA	NA	NA	NA	NA	NA	NA	NA	NA	NA	NA	NA	NA	NA	NA	NA	NA	NA
O94925	287	GLS	GLSK_HUMAN Glutaminase kidney isoform, mitochondrial OS=Homo sapiens OX=9606 GN=GLS PE=1 SV=1	VPFCLQSC(BTD[C])VKPLK|	NA	NA	NA	NA	NA	NA	NA	NA	NA	NA	NA	NA	NA	NA	NA	NA	NA	0.55	NA	NA	NA	NA	NA	NA	NA	NA	NA	NA	NA	NA	NA	NA	NA	NA	NA	NA	NA	NA	NA	NA	NA	NA	NA	NA	NA
O94925	609	GLS	GLSK_HUMAN Glutaminase kidney isoform, mitochondrial OS=Homo sapiens OX=9606 GN=GLS PE=1 SV=1	FLLEAC(BTD[C])K|	NA	NA	NA	NA	NA	NA	NA	NA	NA	NA	NA	NA	NA	NA	NA	NA	NA	NA	NA	NA	NA	NA	NA	NA	NA	NA	NA	NA	NA	NA	NA	NA	NA	NA	NA	NA	NA	NA	NA	NA	NA	NA	NA	NA	NA
O94927	446	HAUS5	HAUS5_HUMAN HAUS augmin-like complex subunit 5 OS=Homo sapiens OX=9606 GN=HAUS5 PE=1 SV=2	ELLRC(BTD[C])LEEEVR|	NA	NA	NA	NA	NA	NA	NA	NA	NA	NA	NA	NA	NA	NA	NA	NA	NA	NA	NA	NA	NA	NA	NA	NA	0.83	NA	NA	NA	NA	NA	NA	NA	NA	NA	NA	NA	NA	NA	NA	NA	NA	NA	NA	NA	NA
O94927	192	HAUS5	HAUS5_HUMAN HAUS augmin-like complex subunit 5 OS=Homo sapiens OX=9606 GN=HAUS5 PE=1 SV=2	TAC(BTD[C])TLR|	NA	NA	NA	NA	NA	NA	NA	NA	NA	NA	NA	NA	NA	NA	NA	NA	NA	NA	NA	NA	NA	NA	NA	NA	0.76	NA	NA	NA	NA	NA	NA	NA	NA	NA	NA	NA	NA	NA	NA	NA	NA	NA	NA	NA	NA
O94952	59	FBXO21	FBX21_HUMAN F-box only protein 21 OS=Homo sapiens OX=9606 GN=FBXO21 PE=2 SV=2	|VSSTC(BTD[C])R	0.9	NA	NA	NA	NA	NA	0.46	NA	NA	NA	NA	0.89	NA	NA	NA	0.9	NA	NA	NA	NA	0.93	NA	NA	0.85	1.09	2.22	NA	NA	NA	NA	NA	NA	NA	NA	NA	NA	NA	NA	NA	NA	NA	NA	NA	NA	NA
O94966	1138	USP19	UBP19_HUMAN Ubiquitin carboxyl-terminal hydrolase 19 OS=Homo sapiens OX=9606 GN=USP19 PE=1 SV=2	FC(BTD[C])IGQK|	NA	NA	NA	NA	NA	NA	NA	NA	NA	NA	NA	NA	NA	NA	NA	NA	NA	NA	NA	NA	0.95	NA	NA	1.01	NA	NA	NA	NA	NA	NA	NA	NA	NA	NA	NA	NA	NA	NA	NA	NA	NA	NA	NA	NA	NA
O94966	338	USP19	UBP19_HUMAN Ubiquitin carboxyl-terminal hydrolase 19 OS=Homo sapiens OX=9606 GN=USP19 PE=1 SV=2	LHPGC(BTD[C])GPHTTFR|	NA	1.27	NA	NA	NA	NA	NA	NA	NA	NA	NA	NA	NA	NA	NA	1.18	NA	NA	NA	NA	NA	NA	NA	0.66	NA	NA	NA	NA	NA	NA	NA	NA	NA	NA	NA	NA	NA	NA	NA	NA	NA	NA	NA	NA	NA
O94967	788	WDR47	WDR47_HUMAN WD repeat-containing protein 47 OS=Homo sapiens OX=9606 GN=WDR47 PE=1 SV=1	VPSC(BTD[C])VR|	NA	NA	NA	NA	NA	NA	NA	NA	NA	NA	NA	1.01	NA	NA	NA	NA	0.8	NA	NA	NA	NA	NA	NA	NA	NA	NA	NA	NA	NA	NA	NA	NA	NA	NA	NA	NA	NA	NA	NA	NA	NA	NA	NA	NA	NA
O94973	491	AP2A2	AP2A2_HUMAN AP-2 complex subunit alpha-2 OS=Homo sapiens OX=9606 GN=AP2A2 PE=1 SV=2	TVFEALQAPAC(BTD[C])HENLVK|	NA	2.31	1.22	0.47	0.63	NA	0.97	0.87	NA	0.51	0.81	1.22	NA	1.19	1.37	NA	NA	NA	0.79	0.37	NA	1.45	0.95	1.19	NA	NA	NA	NA	NA	NA	NA	1.55	1.04	1.53	NA	NA	1.04	0.67	0.97	0.59	0.57	0.79	0.64	1.27	0.8
O94973	532	AP2A2	AP2A2_HUMAN AP-2 complex subunit alpha-2 OS=Homo sapiens OX=9606 GN=AP2A2 PE=1 SV=2	FHLC(BTD[C])SVPTR|	NA	1.2	1.12	NA	NA	1	NA	NA	1.33	NA	NA	1.04	1	NA	2.15	0.89	0.79	1.1	NA	0.51	1	1.35	NA	1.04	0.99	1.19	NA	NA	NA	NA	NA	NA	NA	NA	NA	0.25	1.05	NA	NA	NA	NA	NA	NA	NA	NA
O94973	903	AP2A2	AP2A2_HUMAN AP-2 complex subunit alpha-2 OS=Homo sapiens OX=9606 GN=AP2A2 PE=1 SV=2	|TTQIGC(BTD[C])LLR	NA	1.21	0.55	NA	NA	NA	NA	NA	0.79	NA	NA	NA	NA	NA	NA	NA	NA	NA	1	NA	NA	0.96	NA	NA	NA	0.73	NA	0.58	NA	1.04	NA	NA	NA	NA	NA	NA	NA	0.56	NA	NA	NA	NA	NA	NA	NA
O94973	282	AP2A2	AP2A2_HUMAN AP-2 complex subunit alpha-2 OS=Homo sapiens OX=9606 GN=AP2A2 PE=1 SV=2	LTEC(BTD[C])LETILNK|	NA	NA	NA	NA	NA	NA	NA	NA	NA	NA	NA	NA	NA	NA	NA	NA	NA	NA	NA	NA	1.03	NA	NA	NA	1.01	NA	NA	NA	NA	NA	NA	NA	NA	NA	NA	NA	NA	NA	NA	NA	0.91	NA	NA	NA	NA
O94973	330	AP2A2	AP2A2_HUMAN AP-2 complex subunit alpha-2 OS=Homo sapiens OX=9606 GN=AP2A2 PE=1 SV=2	|AC(BTD[C])NQLGQFLQHR	NA	NA	NA	NA	NA	NA	NA	NA	NA	NA	NA	NA	NA	NA	NA	NA	NA	NA	NA	NA	NA	NA	NA	NA	NA	NA	NA	NA	NA	NA	NA	NA	NA	NA	1.41	NA	NA	NA	NA	NA	NA	NA	NA	NA	NA
O94979	60	SEC31A	SC31A_HUMAN Protein transport protein Sec31A OS=Homo sapiens OX=9606 GN=SEC31A PE=1 SV=3	SC(BTD[C])ATFSSSHR|SC(BTD[C])ATFSSSHR	0.74	1.64	1.12	0.59	0.77	1.58	1.08	0.96	1.48	0.74	0.89	1.33	1.08	NA	1.13	1	0.85	1.2	0.91	0.57	1.25	1.44	0.98	1.09	1.06	1.47	NA	1.01	1.67	0.72	0.62	NA	NA	1.16	1.54	0.46	1.01	0.67	NA	0.63	NA	1.03	NA	1.05	0.77
O94979	644	SEC31A	SC31A_HUMAN Protein transport protein Sec31A OS=Homo sapiens OX=9606 GN=SEC31A PE=1 SV=3	|EIVESC(BTD[C])DLK	NA	1.93	NA	1.1	NA	NA	NA	NA	NA	NA	NA	1.56	NA	NA	NA	1.16	NA	NA	NA	NA	NA	NA	NA	NA	1.23	NA	NA	NA	NA	NA	NA	NA	NA	NA	NA	NA	NA	NA	NA	NA	NA	NA	NA	NA	NA
O94979	704	SEC31A	SC31A_HUMAN Protein transport protein Sec31A OS=Homo sapiens OX=9606 GN=SEC31A PE=1 SV=3	LVAC(BTD[C])WTK|	NA	NA	NA	NA	NA	NA	NA	NA	NA	NA	NA	NA	NA	NA	NA	NA	1.35	NA	NA	NA	NA	NA	NA	0.89	NA	1.05	NA	NA	NA	NA	NA	NA	NA	NA	NA	NA	NA	NA	NA	NA	NA	NA	NA	NA	NA
O94992	297	HEXIM1	HEXI1_HUMAN Protein HEXIM1 OS=Homo sapiens OX=9606 GN=HEXIM1 PE=1 SV=1	|EYLELEKC(BTD[C])LSR	NA	NA	1.17	NA	NA	NA	NA	NA	NA	NA	NA	NA	NA	NA	1.04	1.01	1.25	NA	NA	NA	1.04	NA	NA	NA	NA	1.16	NA	NA	NA	NA	NA	NA	NA	NA	NA	NA	NA	0.68	NA	0.45	NA	NA	NA	0.67	NA
O95071	739	UBR5	UBR5_HUMAN E3 ubiquitin-protein ligase UBR5 OS=Homo sapiens OX=9606 GN=UBR5 PE=1 SV=2	KLC(BTD[C])IPEK|	NA	NA	NA	NA	NA	0.99	NA	NA	1.17	NA	NA	0.94	NA	1.01	1.51	0.89	0.76	0.9	NA	NA	0.94	NA	NA	1.62	NA	1	1.26	NA	NA	NA	1.85	NA	1.2	0.72	NA	1.03	0.78	0.71	0.88	0.84	0.63	0.67	NA	0.88	0.76
O95071	2314	UBR5	UBR5_HUMAN E3 ubiquitin-protein ligase UBR5 OS=Homo sapiens OX=9606 GN=UBR5 PE=1 SV=2	|LPNLEC(BTD[C])IQNANK	NA	NA	NA	NA	NA	NA	NA	NA	NA	NA	NA	NA	NA	NA	NA	1.06	0.54	NA	NA	NA	1.22	NA	NA	NA	0.72	0.86	NA	NA	NA	NA	NA	NA	NA	NA	NA	NA	NA	NA	NA	NA	NA	NA	NA	NA	NA
O95071	1291	UBR5	UBR5_HUMAN E3 ubiquitin-protein ligase UBR5 OS=Homo sapiens OX=9606 GN=UBR5 PE=1 SV=2	QTVEHC(BTD[C])QYRPPR|	NA	NA	NA	NA	NA	NA	NA	NA	NA	NA	NA	NA	NA	NA	NA	NA	NA	NA	NA	NA	1	NA	NA	1.21	NA	NA	NA	NA	NA	NA	NA	NA	NA	NA	NA	NA	NA	NA	NA	NA	NA	NA	NA	NA	NA
O95071	2094	UBR5	UBR5_HUMAN E3 ubiquitin-protein ligase UBR5 OS=Homo sapiens OX=9606 GN=UBR5 PE=1 SV=2	NC(BTD[C])LEVLPTK|	NA	NA	NA	NA	NA	NA	NA	NA	NA	NA	NA	0.99	NA	NA	NA	NA	NA	NA	NA	NA	NA	NA	NA	NA	NA	NA	NA	NA	NA	NA	NA	NA	NA	NA	NA	NA	NA	NA	NA	NA	NA	NA	NA	NA	NA
O95071	2267	UBR5	UBR5_HUMAN E3 ubiquitin-protein ligase UBR5 OS=Homo sapiens OX=9606 GN=UBR5 PE=1 SV=2	|RC(BTD[C])ATTPMAVHR	NA	NA	NA	NA	NA	NA	NA	NA	NA	NA	NA	NA	NA	NA	NA	NA	NA	NA	NA	NA	NA	NA	NA	NA	NA	NA	NA	NA	NA	NA	NA	NA	NA	NA	1.01	NA	NA	NA	NA	NA	NA	NA	NA	NA	NA
O95140	348	MFN2	MFN2_HUMAN Mitofusin-2 OS=Homo sapiens OX=9606 GN=MFN2 PE=1 SV=3	|RFEEC(BTD[C])ISQSAVK	NA	NA	NA	NA	NA	NA	NA	NA	NA	NA	NA	NA	NA	NA	NA	NA	NA	NA	NA	NA	NA	NA	NA	NA	NA	NA	NA	NA	NA	NA	NA	1.32	1.05	NA	NA	NA	NA	NA	NA	NA	NA	NA	NA	NA	NA
O95155	581	UBE4B	UBE4B_HUMAN Ubiquitin conjugation factor E4 B OS=Homo sapiens OX=9606 GN=UBE4B PE=1 SV=1	SLSPGC(BTD[C])GR|	NA	NA	NA	NA	NA	NA	NA	NA	NA	NA	NA	0.65	NA	NA	NA	0.74	0.59	NA	NA	NA	0.79	NA	NA	0.76	NA	0.75	NA	NA	NA	NA	NA	NA	NA	NA	NA	NA	NA	NA	NA	NA	NA	NA	NA	NA	NA
O95159	16	ZFPL1	ZFPL1_HUMAN Zinc finger protein-like 1 OS=Homo sapiens OX=9606 GN=ZFPL1 PE=1 SV=2	VTNLFC(BTD[C])FEHR|VTNLFC(BTD[C])FEHR	NA	NA	NA	NA	NA	NA	NA	NA	NA	NA	NA	1.21	NA	NA	NA	NA	1.25	NA	NA	NA	0.86	NA	NA	0.98	1.04	NA	NA	NA	NA	NA	NA	NA	NA	NA	NA	NA	NA	NA	NA	NA	NA	NA	NA	NA	NA
O95159	56	ZFPL1	ZFPL1_HUMAN Zinc finger protein-like 1 OS=Homo sapiens OX=9606 GN=ZFPL1 PE=1 SV=2	LC(BTD[C])NIPLASR|	NA	NA	NA	NA	NA	NA	NA	NA	NA	NA	NA	NA	NA	NA	NA	NA	NA	NA	NA	NA	NA	NA	NA	NA	NA	NA	NA	NA	NA	NA	NA	NA	NA	NA	NA	NA	NA	NA	NA	NA	NA	NA	NA	NA	NA
O95159	230	ZFPL1	ZFPL1_HUMAN Zinc finger protein-like 1 OS=Homo sapiens OX=9606 GN=ZFPL1 PE=1 SV=2	TPGLHGDC(BTD[C])DDDKYR|	NA	NA	NA	NA	NA	NA	NA	NA	NA	NA	NA	NA	NA	NA	NA	NA	NA	NA	NA	NA	NA	NA	NA	NA	0.95	NA	NA	NA	NA	NA	NA	NA	NA	NA	NA	NA	NA	0.82	NA	0.96	NA	NA	1.49	0.82	0.99
O95163	341	ELP1	ELP1_HUMAN Elongator complex protein 1 OS=Homo sapiens OX=9606 GN=ELP1 PE=1 SV=3	QSLSFSTC(BTD[C])GK|	NA	NA	NA	NA	NA	NA	NA	NA	NA	NA	NA	0.95	NA	NA	NA	0.77	NA	NA	NA	NA	0.91	NA	NA	NA	NA	0.87	NA	NA	NA	NA	NA	NA	NA	NA	NA	NA	NA	NA	NA	NA	NA	NA	NA	NA	NA
O95163	744	ELP1	ELP1_HUMAN Elongator complex protein 1 OS=Homo sapiens OX=9606 GN=ELP1 PE=1 SV=3	|EAFEC(BTD[C])MR	NA	NA	NA	NA	NA	NA	NA	NA	NA	NA	NA	NA	NA	NA	NA	1.27	0.94	NA	NA	NA	NA	NA	NA	NA	NA	1.51	NA	NA	NA	NA	NA	NA	NA	NA	NA	NA	NA	NA	NA	NA	NA	NA	NA	NA	NA
O95163	836	ELP1	ELP1_HUMAN Elongator complex protein 1 OS=Homo sapiens OX=9606 GN=ELP1 PE=1 SV=3	YC(BTD[C])LSILTSHVK|	NA	NA	NA	NA	NA	NA	NA	NA	NA	NA	NA	NA	NA	NA	NA	NA	NA	NA	NA	NA	NA	NA	NA	NA	NA	NA	NA	NA	NA	NA	NA	NA	NA	NA	NA	NA	NA	NA	NA	NA	NA	NA	NA	NA	NA
O95177	37	GAS8-AS1	GAAS1_HUMAN Uncharacterized protein GAS8-AS1 OS=Homo sapiens OX=9606 GN=GAS8-AS1 PE=5 SV=1	AMC(BTD[C])SAR|	NA	NA	NA	NA	NA	1.35	NA	NA	NA	NA	NA	NA	NA	NA	NA	NA	NA	NA	NA	NA	NA	NA	NA	NA	NA	NA	NA	NA	NA	NA	NA	NA	NA	NA	NA	NA	NA	NA	NA	NA	NA	NA	NA	NA	NA
O95197	34	RTN3	RTN3_HUMAN Reticulon-3 OS=Homo sapiens OX=9606 GN=RTN3 PE=1 SV=2	|SISSSSFGAEPSAPGGGGSPGAC(BTD[C])PALGTK	NA	NA	1.09	0.72	0.5	NA	0.57	NA	NA	NA	NA	0.96	0.96	1.23	0.98	0.8	1.08	1.09	0.73	0.7	1.1	2.77	0.51	NA	1	NA	NA	NA	NA	NA	NA	1.45	0.94	NA	0.94	NA	0.78	NA	0.99	NA	0.96	0.94	1.79	1.06	0.69
O95202	379	LETM1	LETM1_HUMAN Mitochondrial proton/calcium exchanger protein OS=Homo sapiens OX=9606 GN=LETM1 PE=1 SV=1	ELQAAC(BTD[C])R|ELQAAC(BTD[C])R	NA	NA	NA	0.49	NA	NA	NA	NA	NA	NA	NA	NA	NA	NA	NA	0.83	NA	NA	NA	NA	1	NA	NA	0.82	NA	NA	NA	NA	NA	NA	NA	NA	1.09	NA	NA	NA	NA	0.7	0.67	0.61	0.56	NA	1.14	0.52	NA
O95202	552	LETM1	LETM1_HUMAN Mitochondrial proton/calcium exchanger protein OS=Homo sapiens OX=9606 GN=LETM1 PE=1 SV=1	EEIDILSDAC(BTD[C])SK|	NA	NA	NA	NA	NA	NA	NA	NA	NA	NA	NA	NA	NA	NA	NA	1.06	NA	NA	NA	NA	NA	NA	NA	NA	NA	NA	NA	NA	NA	NA	NA	NA	NA	NA	NA	NA	NA	NA	NA	NA	NA	NA	NA	NA	NA
O95208	96	EPN2	EPN2_HUMAN Epsin-2 OS=Homo sapiens OX=9606 GN=EPN2 PE=1 SV=3	VAQQC(BTD[C])R|VAQQC(BTD[C])R	NA	2.94	0.83	NA	0.42	1.41	1.68	0.61	1.36	NA	0.69	1.06	NA	NA	NA	0.91	0.47	1.13	NA	0.47	0.86	2.4	0.5	0.83	0.71	1.01	3.6	NA	NA	NA	NA	NA	NA	NA	NA	NA	NA	NA	NA	NA	NA	NA	NA	NA	NA
O95210	168	STBD1	STBD1_HUMAN Starch-binding domain-containing protein 1 OS=Homo sapiens OX=9606 GN=STBD1 PE=1 SV=1	|AATC(BTD[C])FAEK	NA	NA	0.91	NA	NA	NA	NA	NA	NA	NA	NA	0.96	NA	NA	NA	1.01	NA	NA	NA	NA	NA	NA	NA	NA	0.94	NA	1.68	NA	NA	NA	NA	NA	NA	NA	NA	NA	NA	NA	NA	NA	NA	NA	NA	NA	NA
O95218	15	ZRANB2	ZRAB2_HUMAN Zinc finger Ran-binding domain-containing protein 2 OS=Homo sapiens OX=9606 GN=ZRANB2 PE=1 SV=2	VSDGDWIC(BTD[C])PDKK|	NA	NA	NA	NA	NA	NA	NA	NA	NA	NA	NA	NA	NA	NA	NA	NA	NA	NA	NA	NA	0.58	NA	NA	0.88	NA	NA	NA	NA	NA	NA	NA	NA	NA	NA	NA	NA	NA	NA	NA	NA	NA	NA	NA	NA	NA
O95218	74	ZRANB2	ZRAB2_HUMAN Zinc finger Ran-binding domain-containing protein 2 OS=Homo sapiens OX=9606 GN=ZRANB2 PE=1 SV=2	TC(BTD[C])SNVNWAR|	NA	NA	NA	NA	NA	NA	NA	NA	NA	NA	NA	NA	NA	NA	NA	NA	NA	NA	NA	NA	NA	NA	NA	NA	1.05	0.94	NA	NA	NA	NA	NA	NA	NA	NA	NA	NA	NA	NA	NA	NA	NA	NA	NA	NA	NA
O95218	85	ZRANB2	ZRAB2_HUMAN Zinc finger Ran-binding domain-containing protein 2 OS=Homo sapiens OX=9606 GN=ZRANB2 PE=1 SV=2	SEC(BTD[C])NMCNTPK|	NA	NA	NA	NA	NA	NA	NA	NA	NA	NA	NA	NA	NA	NA	NA	NA	NA	NA	NA	NA	NA	NA	NA	NA	NA	0.66	NA	NA	NA	NA	NA	NA	NA	NA	NA	NA	NA	NA	NA	NA	NA	NA	NA	NA	NA
O95218	88	ZRANB2	ZRAB2_HUMAN Zinc finger Ran-binding domain-containing protein 2 OS=Homo sapiens OX=9606 GN=ZRANB2 PE=1 SV=2	|RSECNMC(BTD[C])NTPK	NA	NA	NA	NA	NA	NA	NA	NA	NA	NA	NA	NA	NA	NA	NA	NA	NA	NA	NA	NA	NA	NA	NA	NA	NA	0.56	NA	NA	NA	NA	NA	NA	NA	NA	NA	NA	NA	NA	NA	NA	NA	NA	NA	NA	NA
O95219	172	SNX4	SNX4_HUMAN Sorting nexin-4 OS=Homo sapiens OX=9606 GN=SNX4 PE=1 SV=1	IASHPILC(BTD[C])R|	NA	1.36	NA	NA	NA	NA	NA	NA	NA	NA	NA	1.23	NA	NA	NA	1.15	NA	NA	NA	NA	NA	2.04	NA	1.18	NA	NA	NA	NA	NA	NA	NA	NA	NA	NA	NA	NA	NA	NA	NA	NA	NA	NA	NA	NA	NA
O95232	35	LUC7L3	LC7L3_HUMAN Luc7-like protein 3 OS=Homo sapiens OX=9606 GN=LUC7L3 PE=1 SV=2	WDHESVC(BTD[C])K|	NA	NA	NA	NA	NA	NA	NA	NA	1.19	NA	NA	NA	NA	NA	NA	NA	NA	1.53	NA	NA	1.15	0.71	NA	NA	NA	NA	NA	NA	NA	NA	NA	NA	NA	NA	NA	NA	NA	NA	NA	NA	NA	NA	NA	NA	NA
O95235	762	KIF20A	KI20A_HUMAN Kinesin-like protein KIF20A OS=Homo sapiens OX=9606 GN=KIF20A PE=1 SV=1	AC(BTD[C])CHSTGAGK|AC(BTD[C])CHSTGAGK	0.49	NA	NA	0.41	NA	NA	NA	NA	NA	NA	NA	0.95	0.71	NA	NA	1.06	1.11	0.56	0.7	0.45	0.69	1.56	NA	0.56	0.98	0.51	NA	NA	NA	NA	NA	NA	NA	NA	NA	NA	NA	NA	NA	0.4	NA	0.72	NA	0.66	NA
O95235	763	KIF20A	KI20A_HUMAN Kinesin-like protein KIF20A OS=Homo sapiens OX=9606 GN=KIF20A PE=1 SV=1	ACC(BTD[C])HSTGAGK|ACC(BTD[C])HSTGAGK	NA	NA	0.63	NA	NA	0.95	NA	NA	0.88	NA	NA	0.7	NA	NA	NA	0.64	0.97	0.94	NA	NA	0.68	NA	NA	0.69	0.56	NA	0.86	NA	NA	NA	NA	NA	NA	1.08	NA	NA	NA	0.74	NA	0.65	NA	0.75	NA	NA	NA
O95239	443	KIF4A	KIF4A_HUMAN Chromosome-associated kinesin KIF4A OS=Homo sapiens OX=9606 GN=KIF4A PE=1 SV=3	QHAAC(BTD[C])K|QHAAC(BTD[C])K	NA	1.96	0.74	NA	NA	1	NA	NA	1.05	NA	NA	NA	NA	NA	NA	NA	0.85	1.06	NA	NA	0.88	3.4	0.9	NA	0.69	0.96	2.05	NA	NA	NA	NA	NA	NA	NA	NA	NA	NA	NA	NA	NA	NA	NA	NA	NA	NA
O95239	895	KIF4A	KIF4A_HUMAN Chromosome-associated kinesin KIF4A OS=Homo sapiens OX=9606 GN=KIF4A PE=1 SV=3	TSC(BTD[C])ADMQK|	NA	NA	0.96	0.54	NA	NA	NA	NA	NA	NA	NA	1.1	1.07	NA	NA	NA	0.85	NA	NA	NA	NA	NA	NA	NA	0.89	0.99	NA	NA	NA	NA	NA	NA	NA	NA	NA	NA	NA	NA	NA	NA	NA	NA	NA	NA	NA
O95239	965	KIF4A	KIF4A_HUMAN Chromosome-associated kinesin KIF4A OS=Homo sapiens OX=9606 GN=KIF4A PE=1 SV=3	EQQLLSTLKC(BTD[C])QDEELEK|	NA	NA	NA	NA	NA	NA	NA	NA	NA	NA	NA	NA	NA	NA	NA	NA	NA	NA	NA	NA	NA	NA	NA	NA	NA	NA	NA	NA	NA	NA	NA	NA	NA	NA	NA	NA	NA	NA	NA	NA	NA	NA	NA	NA	NA
O95249	34	GOSR1	GOSR1_HUMAN Golgi SNAP receptor complex member 1 OS=Homo sapiens OX=9606 GN=GOSR1 PE=1 SV=1	LC(BTD[C])TSYSHSSTR|	NA	NA	0.58	0.44	NA	1.17	NA	NA	NA	NA	0.66	0.81	0.57	NA	1.15	0.74	NA	1.01	NA	0.41	NA	1.34	NA	NA	NA	NA	NA	NA	NA	NA	NA	NA	NA	NA	NA	NA	0.88	0.46	NA	0.37	0.35	0.51	0.47	0.66	NA
O95260	205	ATE1	ATE1_HUMAN Arginyl-tRNA--protein transferase 1 OS=Homo sapiens OX=9606 GN=ATE1 PE=1 SV=2	GADLSKPPC(BTD[C])R|	NA	NA	0.71	NA	0.31	NA	NA	1.18	NA	NA	NA	NA	NA	NA	1.15	NA	NA	NA	NA	NA	0.93	NA	0.41	1.31	NA	0.76	0.81	NA	NA	NA	NA	NA	NA	NA	NA	NA	0.69	NA	NA	NA	NA	NA	NA	NA	NA
O95260	138	ATE1	ATE1_HUMAN Arginyl-tRNA--protein transferase 1 OS=Homo sapiens OX=9606 GN=ATE1 PE=1 SV=2	|LDIQC(BTD[C])DLK	NA	NA	NA	NA	NA	NA	NA	NA	NA	NA	NA	NA	NA	NA	NA	1.42	NA	NA	NA	NA	NA	NA	NA	NA	NA	NA	NA	NA	NA	NA	NA	NA	NA	NA	NA	NA	NA	NA	NA	NA	NA	NA	NA	NA	NA
O95273	89	CCNDBP1	CCDB1_HUMAN Cyclin-D1-binding protein 1 OS=Homo sapiens OX=9606 GN=CCNDBP1 PE=1 SV=2	|FC(BTD[C])EQVHAAIK	NA	NA	NA	NA	NA	NA	NA	NA	NA	NA	NA	NA	NA	NA	NA	NA	NA	NA	NA	NA	NA	NA	NA	NA	NA	NA	NA	NA	NA	NA	NA	NA	NA	NA	NA	NA	0.63	NA	NA	NA	NA	NA	NA	NA	0.87
O95292	173	VAPB	VAPB_HUMAN Vesicle-associated membrane protein-associated protein B/C OS=Homo sapiens OX=9606 GN=VAPB PE=1 SV=3	|VMEEC(BTD[C])K	0.63	3.06	1.37	0.38	0.45	NA	NA	1.14	0.87	NA	0.79	1.46	0.74	1.33	NA	1.1	1.1	1.49	0.67	0.47	1.55	NA	0.44	1.1	1.13	1.41	NA	4.97	NA	NA	NA	0.99	1.38	NA	1.15	NA	0.56	0.96	0.78	0.66	0.78	0.71	2.08	0.87	0.59
O95292	121	VAPB	VAPB_HUMAN Vesicle-associated membrane protein-associated protein B/C OS=Homo sapiens OX=9606 GN=VAPB PE=1 SV=3	C(BTD[C])VFELPAENDKPHDVEINK|	NA	2.41	NA	0.48	NA	NA	NA	NA	NA	NA	NA	NA	NA	NA	NA	NA	0.85	NA	0.63	NA	1.48	1.49	NA	NA	1.1	0.76	NA	NA	1.77	NA	NA	NA	NA	NA	1.33	0.91	0.91	0.46	NA	0.38	NA	0.58	NA	NA	NA
O95297	203	MPZL1	MPZL1_HUMAN Myelin protein zero-like protein 1 OS=Homo sapiens OX=9606 GN=MPZL1 PE=1 SV=1	|RDYTGC(BTD[C])STSESLSPVK	NA	NA	NA	NA	NA	NA	NA	NA	NA	NA	NA	NA	NA	NA	NA	NA	NA	NA	NA	NA	NA	NA	NA	NA	NA	NA	NA	NA	NA	NA	NA	NA	NA	NA	NA	NA	NA	NA	NA	NA	NA	NA	NA	NA	NA
O95299	183	NDUFA10	NDUAA_HUMAN NADH dehydrogenase [ubiquinone] 1 alpha subcomplex subunit 10, mitochondrial OS=Homo sapiens OX=9606 GN=NDUFA10 PE=1 SV=1	KQC(BTD[C])VDHYNEVK|	NA	1.45	NA	NA	0.71	1.59	0.52	0.57	0.83	NA	NA	NA	NA	NA	NA	1.3	1.01	1.01	NA	NA	1	NA	0.83	1.05	NA	0.89	NA	NA	1.4	1.09	1.03	NA	NA	0.83	1.11	0.76	0.93	0.9	NA	0.72	NA	NA	NA	0.91	NA
O95299	67	NDUFA10	NDUAA_HUMAN NADH dehydrogenase [ubiquinone] 1 alpha subcomplex subunit 10, mitochondrial OS=Homo sapiens OX=9606 GN=NDUFA10 PE=1 SV=1	VITVDGNIC(BTD[C])TGK|VITVDGNIC(BTD[C])TGK	0.71	NA	NA	NA	NA	1.12	NA	NA	NA	NA	NA	0.72	NA	NA	NA	0.77	0.69	0.87	NA	NA	0.79	NA	NA	0.7	0.63	0.64	NA	NA	NA	NA	NA	NA	NA	NA	NA	NA	NA	NA	NA	NA	NA	NA	NA	NA	NA
O95319	143	CELF2	CELF2_HUMAN CUGBP Elav-like family member 2 OS=Homo sapiens OX=9606 GN=CELF2 PE=1 SV=1	KC(BTD[C])NENDIR|	NA	NA	NA	0.41	NA	1.43	0.56	NA	0.86	NA	NA	1.23	NA	NA	NA	NA	NA	1.03	0.63	0.46	NA	1.82	NA	NA	0.73	1.24	NA	NA	NA	NA	NA	NA	NA	NA	NA	NA	NA	0.44	NA	0.69	NA	0.67	NA	0.73	NA
O95319	201	CELF2	CELF2_HUMAN CUGBP Elav-like family member 2 OS=Homo sapiens OX=9606 GN=CELF2 PE=1 SV=1	|AMHQSQTMEGC(BTD[C])SSPIVVK	NA	NA	NA	NA	NA	NA	NA	NA	NA	NA	NA	NA	NA	NA	NA	NA	NA	NA	NA	NA	NA	NA	NA	NA	NA	NA	NA	NA	NA	NA	NA	NA	NA	NA	NA	NA	NA	NA	NA	NA	NA	NA	NA	NA	NA
O95336	33	PGLS	6PGL_HUMAN 6-phosphogluconolactonase OS=Homo sapiens OX=9606 GN=PGLS PE=1 SV=2	AACC(BTD[C])LAGAR|	NA	3.06	0.69	0.64	NA	0.92	NA	NA	NA	NA	0.64	0.72	0.98	1.54	1.91	NA	0.65	0.81	0.85	0.75	0.62	1.95	NA	0.5	0.64	0.82	0.95	NA	NA	NA	NA	NA	0.95	1	NA	NA	1.7	1.16	1.16	0.86	NA	1.01	NA	0.95	0.86
O95336	32	PGLS	6PGL_HUMAN 6-phosphogluconolactonase OS=Homo sapiens OX=9606 GN=PGLS PE=1 SV=2	AAC(BTD[C])CLAGAR|	NA	3.07	NA	0.65	NA	0.92	NA	NA	1.09	NA	0.65	0.7	0.98	NA	1.46	0.64	0.63	0.79	0.88	0.73	NA	2.08	NA	0.67	1.03	0.61	NA	0.63	3.04	NA	NA	NA	0.73	1.2	NA	NA	NA	NA	NA	NA	NA	0.14	NA	NA	NA
O95340	313	PAPSS2	PAPS2_HUMAN Bifunctional 3'-phosphoadenosine 5'-phosphosulfate synthase 2 OS=Homo sapiens OX=9606 GN=PAPSS2 PE=1 SV=2	|LEGC(BTD[C])SK	NA	NA	0.78	NA	NA	NA	NA	0.55	0.81	NA	NA	0.86	NA	NA	1.22	NA	0.63	NA	NA	NA	1.14	NA	0.39	0.7	0.71	1.02	NA	0.87	NA	NA	NA	1.18	NA	NA	NA	NA	NA	NA	NA	NA	NA	NA	NA	0.96	0.94
O95340	342	PAPSS2	PAPS2_HUMAN Bifunctional 3'-phosphoadenosine 5'-phosphosulfate synthase 2 OS=Homo sapiens OX=9606 GN=PAPSS2 PE=1 SV=2	|KEERC(BTD[C])SR	NA	NA	NA	NA	0.3	NA	NA	NA	NA	NA	NA	NA	NA	NA	NA	NA	NA	NA	NA	NA	NA	NA	NA	NA	NA	NA	NA	NA	NA	NA	NA	NA	NA	NA	NA	NA	NA	NA	NA	NA	NA	NA	NA	NA	NA
O95347	326	SMC2	SMC2_HUMAN Structural maintenance of chromosomes protein 2 OS=Homo sapiens OX=9606 GN=SMC2 PE=1 SV=2	NLAC(BTD[C])EESK|	NA	NA	0.75	NA	0.63	NA	0.71	1.25	NA	0.82	NA	NA	NA	0.98	1.27	NA	0.72	0.61	NA	NA	0.63	NA	1.21	NA	0.7	NA	NA	8.32	3.12	NA	NA	1.53	1.14	0.96	1.53	NA	0.88	0.96	0.96	NA	NA	0.98	2.82	NA	0.92
O95347	800	SMC2	SMC2_HUMAN Structural maintenance of chromosomes protein 2 OS=Homo sapiens OX=9606 GN=SMC2 PE=1 SV=2	KLDC(BTD[C])AK|KLDC(BTD[C])AK	NA	2.78	0.67	0.58	0.26	1.01	0.38	0.32	0.97	0.78	0.81	0.63	0.69	1.01	1.29	NA	NA	0.91	0.59	NA	0.73	3.1	0.35	0.66	0.79	0.76	0.87	NA	4.16	0.23	0.5	1.36	1.36	0.88	1.15	0.19	0.97	0.85	0.98	0.75	0.65	0.8	1.15	1	0.86
O95347	585	SMC2	SMC2_HUMAN Structural maintenance of chromosomes protein 2 OS=Homo sapiens OX=9606 GN=SMC2 PE=1 SV=2	|C(BTD[C])IAPETLR	NA	NA	NA	NA	NA	NA	0.88	NA	NA	NA	NA	NA	NA	NA	NA	1.06	NA	NA	NA	NA	NA	NA	NA	NA	NA	1.24	NA	NA	NA	NA	NA	NA	NA	NA	NA	NA	NA	0.28	NA	NA	NA	NA	NA	NA	NA
O95347	1174	SMC2	SMC2_HUMAN Structural maintenance of chromosomes protein 2 OS=Homo sapiens OX=9606 GN=SMC2 PE=1 SV=2	FTQC(BTD[C])QNGK|FTQC(BTD[C])QNGK	NA	NA	1.16	0.7	NA	NA	NA	NA	NA	NA	NA	0.68	NA	NA	NA	0.99	0.61	NA	NA	0.84	0.82	NA	NA	NA	0.92	0.8	NA	NA	NA	NA	NA	NA	NA	NA	NA	NA	NA	NA	NA	NA	NA	NA	NA	NA	NA
O95363	413	FARS2	SYFM_HUMAN Phenylalanine--tRNA ligase, mitochondrial OS=Homo sapiens OX=9606 GN=FARS2 PE=1 SV=1	TSHC(BTD[C])YR|	NA	1.4	NA	NA	NA	NA	NA	NA	NA	NA	NA	1.27	NA	NA	NA	NA	NA	NA	NA	NA	NA	NA	NA	NA	NA	NA	NA	NA	NA	NA	NA	NA	NA	NA	NA	NA	NA	NA	NA	NA	NA	NA	NA	NA	NA
O95363	344	FARS2	SYFM_HUMAN Phenylalanine--tRNA ligase, mitochondrial OS=Homo sapiens OX=9606 GN=FARS2 PE=1 SV=1	|QFC(BTD[C])VSNINQK	NA	NA	NA	NA	NA	NA	NA	NA	NA	NA	NA	NA	NA	NA	NA	NA	0.95	NA	NA	NA	NA	NA	NA	NA	NA	NA	NA	NA	NA	NA	NA	NA	NA	NA	NA	NA	NA	NA	NA	NA	NA	NA	NA	NA	NA
O95372	56	LYPLA2	LYPA2_HUMAN Acyl-protein thioesterase 2 OS=Homo sapiens OX=9606 GN=LYPLA2 PE=1 SV=1	|YIC(BTD[C])PHAPR	NA	1.09	0.89	NA	0.78	0.93	0.85	0.65	NA	NA	NA	1.04	NA	1.07	1	NA	0.71	0.88	0.9	0.71	0.99	1.16	NA	0.96	0.91	0.97	1.24	NA	1.28	NA	NA	2.08	0.91	0.85	0.75	NA	1.11	0.75	0.56	0.56	NA	0.87	NA	0.89	NA
O95372	213	LYPLA2	LYPA2_HUMAN Acyl-protein thioesterase 2 OS=Homo sapiens OX=9606 GN=LYPLA2 PE=1 SV=1	TYPGVMHSSC(BTD[C])PQEMAAVK|	NA	NA	NA	NA	0.5	NA	NA	0.67	NA	NA	NA	NA	NA	NA	1.56	NA	NA	NA	NA	NA	NA	NA	NA	NA	NA	NA	NA	NA	NA	NA	NA	2.04	1.14	0.97	1.39	0.27	0.9	NA	NA	NA	NA	NA	NA	NA	NA
O95372	171	LYPLA2	LYPA2_HUMAN Acyl-protein thioesterase 2 OS=Homo sapiens OX=9606 GN=LYPLA2 PE=1 SV=1	DLAILQC(BTD[C])HGELDPMVPVR|	NA	NA	NA	NA	NA	NA	NA	NA	NA	NA	NA	NA	NA	NA	NA	NA	0.99	NA	NA	NA	NA	NA	NA	NA	0.92	1.38	NA	NA	NA	NA	NA	NA	NA	NA	NA	NA	NA	NA	NA	NA	NA	NA	NA	NA	NA
O95373	736	IPO7	IPO7_HUMAN Importin-7 OS=Homo sapiens OX=9606 GN=IPO7 PE=1 SV=1	KVLTGVAGEDAEC(BTD[C])HAAK VLTGVAGEDAEC(BTD[C])HAAK|VLTGVAGEDAEC(BTD[C])HAAK	0.36	3.32	1.04	0.8	0.41	1.31	0.55	0.49	1.01	0.75	1.04	1.06	1.1	1.04	1.14	NA	1.01	1.1	0.97	1.01	1.06	2.34	0.54	0.9	0.88	1.08	2.11	NA	2.95	0.61	0.49	2.11	NA	0.98	2.2	0.39	1.08	1.4	1.18	0.94	1.25	0.87	2.54	1.23	0.8
O95373	504	IPO7	IPO7_HUMAN Importin-7 OS=Homo sapiens OX=9606 GN=IPO7 PE=1 SV=1	RC(BTD[C])LIDDR|RC(BTD[C])LIDDR	0.48	1.51	1.04	0.39	0.94	1.57	0.71	0.76	1.11	NA	1	1.43	NA	0.89	1.06	1.33	0.73	1.18	NA	NA	1.36	1.29	0.89	1.06	0.92	1.61	3.53	6.79	NA	0.53	0.34	NA	0.96	0.75	1	0.3	0.9	0.97	0.89	0.65	NA	0.76	0.83	0.82	NA
O95373	90	IPO7	IPO7_HUMAN Importin-7 OS=Homo sapiens OX=9606 GN=IPO7 PE=1 SV=1	ETAPGDISPYTIPEEDRHC(BTD[C])IR|	NA	NA	NA	NA	NA	NA	NA	NA	NA	NA	NA	NA	NA	NA	NA	NA	NA	NA	NA	NA	NA	NA	NA	NA	NA	NA	NA	NA	NA	NA	1.02	NA	NA	NA	NA	0.85	NA	NA	NA	NA	NA	NA	NA	NA	NA
O95373	113	IPO7	IPO7_HUMAN Importin-7 OS=Homo sapiens OX=9606 GN=IPO7 PE=1 SV=1	VQLTTC(BTD[C])IHHIIK|	NA	NA	0.99	NA	NA	NA	NA	NA	NA	NA	NA	NA	NA	NA	NA	NA	0.96	1.41	NA	NA	1.5	NA	NA	NA	NA	1.77	NA	NA	NA	NA	NA	NA	NA	NA	NA	NA	NA	NA	NA	NA	NA	NA	NA	NA	NA
O95394	249	PGM3	AGM1_HUMAN Phosphoacetylglucosamine mutase OS=Homo sapiens OX=9606 GN=PGM3 PE=1 SV=1	|LNHLC(BTD[C])GADFVK	NA	1.97	0.98	NA	0.46	1.55	0.6	NA	NA	NA	0.88	1.5	NA	NA	NA	NA	0.78	1.32	NA	0.61	1.08	2	NA	0.92	1.13	1.51	NA	0.35	0.96	NA	NA	NA	NA	NA	NA	0.09	0.75	NA	1.67	NA	NA	0.38	NA	0.66	NA
O95394	348	PGM3	AGM1_HUMAN Phosphoacetylglucosamine mutase OS=Homo sapiens OX=9606 GN=PGM3 PE=1 SV=1	VPVYC(BTD[C])TK|	0.39	1.22	NA	NA	0.35	1.07	0.71	0.52	0.8	NA	NA	NA	0.78	NA	1.02	1.47	NA	NA	NA	NA	0.68	NA	0.6	NA	1.33	NA	NA	0.38	NA	NA	NA	NA	0.91	NA	NA	0.27	NA	0.6	0.87	1.21	0.58	0.75	NA	0.96	0.71
O95394	200	PGM3	AGM1_HUMAN Phosphoacetylglucosamine mutase OS=Homo sapiens OX=9606 GN=PGM3 PE=1 SV=1	QASC(BTD[C])SGDEYR|QASC(BTD[C])SGDEYR	NA	NA	NA	NA	NA	NA	NA	NA	NA	NA	NA	0.95	NA	NA	1.23	NA	0.88	NA	NA	NA	1	NA	NA	1.11	NA	NA	NA	NA	NA	NA	NA	NA	1.13	NA	NA	NA	NA	NA	1.08	NA	NA	NA	NA	NA	NA
O95394	212	PGM3	AGM1_HUMAN Phosphoacetylglucosamine mutase OS=Homo sapiens OX=9606 GN=PGM3 PE=1 SV=1	|VDC(BTD[C])ANGIGALK	NA	NA	NA	NA	NA	NA	NA	NA	NA	NA	NA	NA	NA	NA	NA	NA	NA	NA	NA	NA	NA	2.43	NA	NA	NA	NA	1.75	NA	NA	NA	NA	NA	NA	NA	NA	NA	NA	NA	NA	NA	NA	NA	NA	NA	NA
O95433	301	AHSA1	AHSA1_HUMAN Activator of 90 kDa heat shock protein ATPase homolog 1 OS=Homo sapiens OX=9606 GN=AHSA1 PE=1 SV=1	NGETELC(BTD[C])MEGR|	NA	3.22	NA	NA	NA	NA	NA	0.81	NA	NA	NA	NA	NA	NA	NA	NA	0.95	NA	NA	NA	1.71	NA	NA	NA	1.12	1.11	NA	NA	NA	NA	NA	NA	NA	NA	NA	NA	NA	NA	NA	NA	NA	NA	NA	NA	NA
O95433	56	AHSA1	AHSA1_HUMAN Activator of 90 kDa heat shock protein ATPase homolog 1 OS=Homo sapiens OX=9606 GN=AHSA1 PE=1 SV=1	LAVQVQNEEGKC(BTD[C])EVTEVSK|	NA	NA	NA	NA	NA	NA	NA	NA	NA	NA	NA	NA	NA	NA	NA	NA	NA	NA	NA	NA	1.26	NA	NA	NA	NA	NA	NA	NA	1.23	NA	NA	NA	NA	NA	NA	NA	NA	0.83	NA	NA	NA	NA	NA	NA	NA
O95445	95	APOM	APOM_HUMAN Apolipoprotein M OS=Homo sapiens OX=9606 GN=APOM PE=1 SV=2	DGLC(BTD[C])VPR|	NA	NA	NA	NA	NA	NA	NA	NA	NA	NA	NA	NA	NA	NA	NA	NA	NA	NA	NA	NA	NA	NA	NA	NA	NA	NA	NA	NA	NA	NA	NA	NA	NA	NA	NA	NA	NA	NA	NA	NA	NA	NA	NA	NA	NA
O95456	157	PSMG1	PSMG1_HUMAN Proteasome assembly chaperone 1 OS=Homo sapiens OX=9606 GN=PSMG1 PE=1 SV=1	|VFGSC(BTD[C])PR	0.38	NA	0.88	0.59	0.31	1.1	0.49	0.39	1.1	0.52	0.55	0.78	1.39	0.97	1.44	0.84	0.74	0.97	0.89	0.69	0.92	NA	0.57	0.84	0.75	1	1.14	NA	1.49	NA	NA	1.23	NA	0.92	1.34	NA	0.46	0.35	1.02	0.98	NA	0.34	NA	0.62	NA
O95466	300	FMNL1	FMNL1_HUMAN Formin-like protein 1 OS=Homo sapiens OX=9606 GN=FMNL1 PE=1 SV=3	EVC(BTD[C])GEQHR|	NA	NA	1.11	NA	NA	NA	NA	0.43	NA	NA	NA	1.28	NA	NA	NA	NA	0.9	0.95	NA	NA	1.21	NA	NA	NA	0.95	1.06	NA	NA	NA	NA	NA	NA	NA	NA	NA	NA	NA	NA	NA	0.67	NA	NA	NA	NA	NA
O95476	6	CTDNEP1	CNEP1_HUMAN CTD nuclear envelope phosphatase 1 OS=Homo sapiens OX=9606 GN=CTDNEP1 PE=1 SV=2	|TQC(BTD[C])LLGLR	NA	NA	NA	NA	NA	NA	NA	NA	NA	NA	NA	NA	NA	NA	1.23	NA	NA	NA	NA	NA	NA	NA	NA	NA	NA	NA	NA	5.47	NA	NA	NA	NA	NA	NA	NA	NA	NA	2.43	NA	NA	NA	NA	NA	NA	NA
O95478	154	NSA2	NSA2_HUMAN Ribosome biogenesis protein NSA2 homolog OS=Homo sapiens OX=9606 GN=NSA2 PE=1 SV=1	|VC(BTD[C])FVGDGFTR	NA	NA	NA	NA	NA	NA	NA	NA	NA	NA	NA	NA	NA	NA	NA	NA	NA	NA	NA	NA	NA	NA	NA	NA	NA	NA	NA	0.59	NA	NA	NA	NA	NA	NA	NA	NA	NA	NA	NA	NA	NA	NA	NA	NA	NA
O95486	381	SEC24A	SC24A_HUMAN Protein transport protein Sec24A OS=Homo sapiens OX=9606 GN=SEC24A PE=1 SV=2	|LNC(BTD[C])NPELFR	NA	NA	NA	NA	0.85	NA	NA	NA	NA	NA	NA	NA	NA	NA	NA	0.79	NA	NA	NA	NA	0.97	NA	NA	1.04	NA	NA	NA	NA	NA	NA	NA	NA	NA	NA	NA	NA	NA	NA	NA	NA	NA	NA	NA	NA	NA
O95486	928	SEC24A	SC24A_HUMAN Protein transport protein Sec24A OS=Homo sapiens OX=9606 GN=SEC24A PE=1 SV=2	IFAMC(BTD[C])QVK|	NA	NA	NA	NA	NA	NA	NA	NA	NA	NA	NA	NA	NA	NA	NA	NA	NA	NA	NA	NA	0.82	NA	NA	0.98	NA	NA	NA	NA	NA	NA	NA	NA	NA	NA	NA	NA	NA	NA	NA	NA	NA	NA	NA	NA	NA
O95487	555	SEC24B	SC24B_HUMAN Protein transport protein Sec24B OS=Homo sapiens OX=9606 GN=SEC24B PE=1 SV=2	|LNC(BTD[C])SPDSFR	NA	NA	NA	NA	NA	NA	NA	NA	NA	NA	NA	0.93	NA	NA	NA	1.12	0.75	NA	NA	NA	1.22	NA	NA	NA	1.09	0.8	NA	NA	NA	NA	NA	NA	NA	NA	NA	NA	NA	NA	NA	NA	NA	NA	NA	NA	NA
O95487	1103	SEC24B	SC24B_HUMAN Protein transport protein Sec24B OS=Homo sapiens OX=9606 GN=SEC24B PE=1 SV=2	VYAMC(BTD[C])QIK|	NA	NA	NA	NA	NA	NA	NA	NA	NA	NA	NA	NA	NA	NA	NA	NA	NA	NA	NA	NA	NA	NA	NA	NA	NA	0.81	NA	NA	NA	NA	NA	NA	NA	NA	NA	NA	NA	NA	NA	NA	NA	NA	NA	NA	NA
O95498	415	VNN2	VNN2_HUMAN Vascular non-inflammatory molecule 2 OS=Homo sapiens OX=9606 GN=VNN2 PE=1 SV=3	|ITTC(BTD[C])GR	NA	NA	NA	NA	NA	NA	NA	NA	NA	NA	NA	NA	NA	NA	0.92	NA	NA	NA	NA	NA	NA	NA	NA	NA	NA	NA	NA	NA	NA	NA	NA	NA	0.93	NA	NA	NA	NA	NA	NA	NA	NA	0.36	NA	0.5	NA
O95544	69	NADK	NADK_HUMAN NAD kinase OS=Homo sapiens OX=9606 GN=NADK PE=1 SV=1	|SLHGPC(BTD[C])PVTTFGPK	NA	NA	NA	NA	NA	NA	NA	NA	NA	NA	NA	NA	NA	NA	NA	NA	NA	NA	NA	NA	NA	NA	NA	NA	NA	NA	NA	NA	NA	NA	NA	NA	NA	NA	NA	NA	NA	NA	NA	NA	NA	NA	NA	NA	NA
O95571	98	ETHE1	ETHE1_HUMAN Persulfide dioxygenase ETHE1, mitochondrial OS=Homo sapiens OX=9606 GN=ETHE1 PE=1 SV=2	SLLPGC(BTD[C])QSVISR|	NA	1.39	0.9	NA	NA	0.74	NA	NA	0.83	NA	0.54	0.78	0.78	NA	0.97	0.59	0.51	1.02	0.57	0.42	0.86	NA	0.69	0.65	0.59	0.69	NA	0.3	NA	NA	NA	1.26	1.47	NA	NA	NA	NA	0.36	1.14	NA	NA	NA	NA	NA	NA
O95571	219	ETHE1	ETHE1_HUMAN Persulfide dioxygenase ETHE1, mitochondrial OS=Homo sapiens OX=9606 GN=ETHE1 PE=1 SV=2	LTLSC(BTD[C])EEFVK|	NA	NA	NA	0.53	1.01	NA	NA	NA	NA	NA	NA	NA	0.72	NA	NA	1.05	1	NA	1.09	0.49	1.13	NA	NA	0.82	NA	NA	NA	NA	NA	NA	NA	NA	1.02	NA	NA	NA	NA	0.37	NA	0.33	NA	NA	NA	NA	NA
O95571	170	ETHE1	ETHE1_HUMAN Persulfide dioxygenase ETHE1, mitochondrial OS=Homo sapiens OX=9606 GN=ETHE1 PE=1 SV=2	TDFQQGC(BTD[C])AK|	NA	NA	NA	NA	NA	NA	NA	NA	NA	NA	NA	0.67	NA	NA	NA	1.06	1.03	NA	NA	NA	0.79	NA	NA	0.72	NA	0.61	NA	NA	NA	NA	NA	NA	NA	NA	NA	NA	NA	NA	NA	NA	NA	NA	NA	NA	NA
O95573	166	ACSL3	ACSL3_HUMAN Long-chain-fatty-acid--CoA ligase 3 OS=Homo sapiens OX=9606 GN=ACSL3 PE=1 SV=3	|TNIAIFC(BTD[C])ETR	NA	NA	1.31	NA	NA	NA	NA	NA	NA	NA	NA	NA	NA	NA	NA	NA	NA	NA	NA	NA	NA	NA	NA	0.93	NA	1.26	NA	NA	NA	NA	NA	NA	NA	NA	NA	0.93	NA	NA	NA	NA	0.46	NA	NA	NA	NA
O95573	504	ACSL3	ACSL3_HUMAN Long-chain-fatty-acid--CoA ligase 3 OS=Homo sapiens OX=9606 GN=ACSL3 PE=1 SV=3	|VGAPLVCC(BTD[C])EIK	NA	NA	NA	NA	NA	NA	NA	NA	NA	NA	NA	NA	NA	NA	NA	NA	0.7	NA	NA	NA	NA	NA	NA	NA	NA	NA	NA	NA	NA	NA	NA	NA	NA	NA	NA	NA	NA	NA	NA	NA	NA	NA	NA	NA	NA
O95602	822	POLR1A	RPA1_HUMAN DNA-directed RNA polymerase I subunit RPA1 OS=Homo sapiens OX=9606 GN=POLR1A PE=1 SV=2	IIEESTHC(BTD[C])GPQAVR|	NA	NA	1.14	NA	NA	NA	NA	NA	NA	NA	NA	NA	NA	NA	NA	NA	0.88	NA	NA	NA	NA	NA	NA	1.03	NA	NA	NA	NA	NA	NA	NA	NA	NA	NA	NA	NA	NA	NA	NA	NA	NA	NA	NA	NA	NA
O95602	582	POLR1A	RPA1_HUMAN DNA-directed RNA polymerase I subunit RPA1 OS=Homo sapiens OX=9606 GN=POLR1A PE=1 SV=2	LHYANC(BTD[C])K|	NA	0.92	0.78	0.46	NA	0.99	NA	0.67	NA	NA	NA	NA	NA	NA	NA	0.74	0.67	NA	NA	NA	0.78	NA	NA	0.76	0.8	1.08	NA	NA	NA	NA	NA	NA	NA	NA	NA	0.61	NA	NA	NA	NA	NA	NA	NA	NA	NA
O95602	1289	POLR1A	RPA1_HUMAN DNA-directed RNA polymerase I subunit RPA1 OS=Homo sapiens OX=9606 GN=POLR1A PE=1 SV=2	|VC(BTD[C])LGEVLQK	NA	NA	NA	NA	NA	NA	NA	NA	NA	NA	NA	1	NA	NA	1.08	0.95	0.86	NA	NA	NA	NA	NA	NA	0.92	0.63	NA	NA	NA	NA	NA	NA	NA	NA	NA	NA	NA	NA	NA	NA	1.87	NA	1.07	NA	NA	NA
O95602	880	POLR1A	RPA1_HUMAN DNA-directed RNA polymerase I subunit RPA1 OS=Homo sapiens OX=9606 GN=POLR1A PE=1 SV=2	AC(BTD[C])MPFGLHR|AC(BTD[C])MPFGLHR	NA	NA	1.05	NA	NA	NA	NA	NA	NA	NA	NA	NA	0.91	NA	NA	NA	NA	NA	0.84	0.74	1	NA	NA	NA	NA	NA	NA	NA	NA	NA	NA	NA	NA	NA	NA	NA	NA	NA	NA	NA	NA	NA	NA	NA	NA
O95602	1699	POLR1A	RPA1_HUMAN DNA-directed RNA polymerase I subunit RPA1 OS=Homo sapiens OX=9606 GN=POLR1A PE=1 SV=2	|SPSAC(BTD[C])LVVGK	NA	NA	NA	NA	NA	NA	NA	NA	NA	NA	NA	1.02	NA	NA	NA	NA	0.62	NA	NA	NA	1.03	NA	NA	NA	NA	1.01	NA	NA	NA	NA	NA	NA	NA	NA	NA	NA	NA	NA	NA	NA	NA	NA	NA	NA	NA
O95602	780	POLR1A	RPA1_HUMAN DNA-directed RNA polymerase I subunit RPA1 OS=Homo sapiens OX=9606 GN=POLR1A PE=1 SV=2	|VLTC(BTD[C])LAR	NA	NA	NA	NA	NA	NA	NA	NA	NA	NA	NA	NA	NA	NA	NA	NA	NA	NA	NA	NA	NA	NA	NA	NA	NA	NA	2.45	NA	NA	NA	NA	NA	NA	NA	NA	NA	NA	NA	NA	NA	NA	NA	NA	NA	NA
O95602	185	POLR1A	RPA1_HUMAN DNA-directed RNA polymerase I subunit RPA1 OS=Homo sapiens OX=9606 GN=POLR1A PE=1 SV=2	|NVC(BTD[C])ESK	NA	NA	NA	NA	NA	NA	NA	NA	NA	NA	NA	1.19	NA	NA	NA	NA	NA	NA	NA	NA	NA	NA	NA	NA	0.95	NA	NA	NA	NA	NA	NA	NA	NA	NA	NA	NA	NA	NA	NA	NA	NA	NA	NA	NA	NA
O95619	210	YEATS4	YETS4_HUMAN YEATS domain-containing protein 4 OS=Homo sapiens OX=9606 GN=YEATS4 PE=1 SV=1	|ETINC(BTD[C])LK	NA	NA	NA	NA	NA	NA	NA	NA	NA	NA	NA	1.06	NA	NA	NA	NA	NA	NA	NA	NA	NA	NA	NA	NA	0.84	0.89	NA	NA	NA	NA	NA	1.79	1.4	NA	NA	NA	NA	NA	NA	1.13	NA	NA	NA	NA	NA
O95630	390	STAMBP	STABP_HUMAN STAM-binding protein OS=Homo sapiens OX=9606 GN=STAMBP PE=1 SV=1	LTDHGLEEISSC(BTD[C])R|	NA	NA	NA	NA	NA	NA	NA	NA	NA	NA	NA	NA	NA	NA	NA	NA	NA	NA	NA	NA	NA	NA	NA	NA	NA	NA	NA	NA	NA	NA	NA	NA	NA	NA	NA	NA	NA	NA	NA	NA	NA	NA	NA	NA	NA
O95639	55	CPSF4	CPSF4_HUMAN Cleavage and polyadenylation specificity factor subunit 4 OS=Homo sapiens OX=9606 GN=CPSF4 PE=1 SV=1	|GGMC(BTD[C])PFR	0.59	NA	1.74	NA	NA	NA	NA	NA	NA	NA	NA	NA	NA	NA	NA	NA	NA	NA	NA	NA	NA	NA	0.69	NA	NA	NA	NA	NA	NA	NA	NA	NA	NA	NA	NA	0.5	NA	NA	NA	NA	NA	NA	NA	NA	NA
O95639	245	CPSF4	CPSF4_HUMAN Cleavage and polyadenylation specificity factor subunit 4 OS=Homo sapiens OX=9606 GN=CPSF4 PE=1 SV=1	PLEQVTC(BTD[C])YK|	NA	NA	NA	NA	NA	NA	NA	NA	NA	NA	NA	NA	NA	NA	NA	NA	NA	NA	NA	NA	NA	NA	NA	NA	NA	NA	NA	NA	NA	NA	NA	NA	NA	NA	NA	NA	NA	NA	NA	NA	NA	NA	NA	NA	NA
O95671	4	ASMTL	ASML_HUMAN Probable bifunctional dTTP/UTP pyrophosphatase/methyltransferase protein OS=Homo sapiens OX=9606 GN=ASMTL PE=1 SV=3	VLC(BTD[C])PVIGK|	NA	NA	NA	NA	0.47	0.9	NA	0.54	0.97	NA	NA	0.7	0.63	1.35	1.13	0.81	NA	0.9	0.84	NA	0.91	2.65	0.44	NA	0.74	1.05	2.18	NA	NA	NA	NA	NA	1.58	NA	NA	NA	NA	NA	NA	NA	NA	NA	NA	NA	NA
O95671	305	ASMTL	ASML_HUMAN Probable bifunctional dTTP/UTP pyrophosphatase/methyltransferase protein OS=Homo sapiens OX=9606 GN=ASMTL PE=1 SV=3	GLLTAC(BTD[C])K|	NA	NA	NA	NA	NA	1.39	NA	NA	NA	NA	NA	NA	NA	NA	NA	NA	NA	NA	NA	NA	0.82	NA	NA	NA	0.84	NA	NA	NA	NA	NA	NA	NA	NA	NA	NA	1.24	NA	NA	NA	NA	NA	NA	NA	NA	NA
O95671	333	ASMTL	ASML_HUMAN Probable bifunctional dTTP/UTP pyrophosphatase/methyltransferase protein OS=Homo sapiens OX=9606 GN=ASMTL PE=1 SV=3	VDASAC(BTD[C])GMER|	NA	NA	NA	NA	NA	NA	NA	NA	NA	NA	NA	0.95	NA	NA	NA	NA	NA	NA	NA	NA	NA	NA	NA	NA	2.68	NA	NA	NA	NA	NA	NA	NA	NA	NA	NA	NA	NA	NA	NA	NA	NA	NA	NA	NA	NA
O95696	86	BRD1	BRD1_HUMAN Bromodomain-containing protein 1 OS=Homo sapiens OX=9606 GN=BRD1 PE=1 SV=1	ENSERPPVC(BTD[C])LR|	NA	NA	NA	NA	NA	NA	NA	NA	NA	NA	NA	NA	NA	NA	NA	NA	NA	NA	NA	NA	1.09	NA	NA	NA	NA	NA	NA	NA	NA	NA	NA	NA	NA	NA	NA	NA	1.18	NA	NA	NA	NA	NA	NA	NA	NA
O95714	3158	HERC2	HERC2_HUMAN E3 ubiquitin-protein ligase HERC2 OS=Homo sapiens OX=9606 GN=HERC2 PE=1 SV=2	VIQVAC(BTD[C])GSR|	NA	NA	NA	NA	NA	NA	NA	NA	NA	NA	NA	NA	NA	NA	NA	NA	NA	NA	NA	NA	1.27	NA	NA	NA	NA	NA	NA	NA	NA	NA	NA	NA	NA	NA	NA	NA	NA	NA	NA	NA	NA	NA	NA	NA	NA
O95714	3087	HERC2	HERC2_HUMAN E3 ubiquitin-protein ligase HERC2 OS=Homo sapiens OX=9606 GN=HERC2 PE=1 SV=2	|MNC(BTD[C])DKPR	NA	NA	NA	NA	NA	NA	NA	NA	NA	NA	NA	NA	NA	NA	NA	NA	0.48	NA	NA	NA	NA	NA	NA	NA	NA	NA	NA	NA	NA	NA	NA	NA	NA	NA	NA	NA	NA	NA	NA	NA	NA	NA	NA	NA	NA
O95716	184	RAB3D	RAB3D_HUMAN Ras-related protein Rab-3D OS=Homo sapiens OX=9606 GN=RAB3D PE=1 SV=1	|LVDVIC(BTD[C])EK	NA	NA	NA	NA	NA	NA	NA	NA	NA	NA	NA	1.87	NA	NA	NA	1.26	0.56	1.41	NA	0.74	NA	NA	NA	0.99	1	1.51	NA	NA	NA	NA	NA	NA	NA	NA	NA	NA	NA	NA	NA	NA	NA	NA	NA	NA	NA
O95747	53	OXSR1	OXSR1_HUMAN Serine/threonine-protein kinase OSR1 OS=Homo sapiens OX=9606 GN=OXSR1 PE=1 SV=1	INLEKC(BTD[C])QTSMDELLK|	NA	NA	NA	NA	NA	NA	1.04	NA	NA	NA	NA	NA	NA	NA	NA	NA	0.86	NA	NA	NA	1.22	NA	NA	NA	0.81	NA	NA	NA	NA	NA	NA	NA	NA	NA	NA	NA	NA	NA	NA	NA	NA	NA	NA	NA	NA
O95747	271	OXSR1	OXSR1_HUMAN Serine/threonine-protein kinase OSR1 OS=Homo sapiens OX=9606 GN=OXSR1 PE=1 SV=1	|MISLC(BTD[C])LQK	NA	NA	NA	NA	NA	NA	NA	NA	NA	NA	NA	NA	0.94	NA	NA	NA	NA	NA	NA	0.58	1.27	NA	NA	NA	NA	1.42	NA	NA	NA	NA	NA	NA	NA	NA	NA	NA	NA	NA	NA	NA	NA	NA	NA	NA	NA
O95751	35	LDOC1	LDOC1_HUMAN Protein LDOC1 OS=Homo sapiens OX=9606 GN=LDOC1 PE=1 SV=1	LLVC(BTD[C])ER|	NA	NA	NA	NA	NA	NA	NA	NA	NA	NA	NA	0.91	NA	NA	NA	NA	NA	NA	NA	NA	0.81	NA	NA	NA	NA	NA	NA	NA	NA	NA	NA	NA	NA	NA	NA	NA	NA	NA	NA	NA	NA	NA	NA	NA	NA
O95757	589	HSPA4L	HS74L_HUMAN Heat shock 70 kDa protein 4L OS=Homo sapiens OX=9606 GN=HSPA4L PE=1 SV=3	SIDLPIQSSLC(BTD[C])R|	NA	NA	0.83	0.41	NA	NA	0.89	NA	NA	NA	NA	1.2	NA	NA	NA	1	0.81	0.86	NA	NA	NA	1.38	NA	NA	0.97	0.98	NA	NA	NA	NA	NA	NA	NA	NA	NA	NA	NA	0.42	NA	NA	NA	NA	NA	NA	NA
O95757	540	HSPA4L	HS74L_HUMAN Heat shock 70 kDa protein 4L OS=Homo sapiens OX=9606 GN=HSPA4L PE=1 SV=3	C(BTD[C])HAEHTPEEEIDHTGAK|	NA	NA	NA	NA	0.96	NA	NA	NA	NA	NA	NA	NA	NA	NA	NA	NA	NA	NA	NA	NA	NA	NA	NA	NA	NA	NA	NA	NA	NA	NA	NA	NA	NA	NA	NA	NA	NA	NA	NA	NA	NA	NA	NA	NA	NA
O95757	782	HSPA4L	HS74L_HUMAN Heat shock 70 kDa protein 4L OS=Homo sapiens OX=9606 GN=HSPA4L PE=1 SV=3	ELDNFC(BTD[C])NPIIYKPK|	NA	NA	NA	NA	NA	NA	NA	NA	NA	NA	NA	NA	NA	NA	NA	0.98	NA	NA	NA	NA	1.35	NA	NA	NA	NA	1.04	NA	NA	NA	NA	NA	NA	NA	NA	NA	0.66	NA	NA	NA	NA	NA	NA	NA	NA	NA
O95757	167	HSPA4L	HS74L_HUMAN Heat shock 70 kDa protein 4L OS=Homo sapiens OX=9606 GN=HSPA4L PE=1 SV=3	|SVMAAAQVAGLNC(BTD[C])LR	NA	NA	NA	NA	NA	NA	NA	NA	NA	NA	NA	NA	NA	NA	NA	NA	NA	NA	NA	NA	NA	NA	NA	NA	NA	NA	NA	NA	NA	NA	NA	NA	NA	NA	NA	NA	NA	NA	NA	NA	NA	NA	NA	NA	NA
O95758	55	PTBP3	PTBP3_HUMAN Polypyrimidine tract-binding protein 3 OS=Homo sapiens OX=9606 GN=PTBP3 PE=1 SV=2	DRPPC(BTD[C])SPSR|	NA	NA	NA	NA	NA	NA	NA	NA	NA	NA	NA	NA	NA	NA	1.11	NA	NA	0.78	NA	NA	NA	NA	NA	NA	NA	NA	1.04	NA	NA	NA	NA	NA	NA	NA	NA	NA	0.91	NA	NA	0.99	NA	0.84	1.4	0.97	0.87
O95758	500	PTBP3	PTBP3_HUMAN Polypyrimidine tract-binding protein 3 OS=Homo sapiens OX=9606 GN=PTBP3 PE=1 SV=2	NLFIEAGC(BTD[C])SVK|	NA	NA	NA	NA	NA	NA	NA	NA	NA	NA	NA	NA	NA	NA	NA	NA	NA	NA	NA	NA	NA	NA	NA	NA	NA	NA	NA	NA	NA	NA	NA	NA	NA	NA	NA	NA	NA	NA	NA	NA	NA	NA	NA	NA	NA
O95782	492	AP2A1	AP2A1_HUMAN AP-2 complex subunit alpha-1 OS=Homo sapiens OX=9606 GN=AP2A1 PE=1 SV=3	TVFEALQAPAC(BTD[C])HENMVK|	0.73	2.44	1.09	0.65	0.65	1.57	1	0.84	1.4	0.47	0.85	NA	NA	1.26	1.43	1.02	0.9	1.02	0.79	NA	NA	1.72	0.79	0.98	1.04	1.49	1.85	1	NA	NA	NA	NA	1.47	1.52	NA	NA	1.22	0.52	NA	0.6	0.54	0.54	0.61	NA	0.66
O95782	533	AP2A1	AP2A1_HUMAN AP-2 complex subunit alpha-1 OS=Homo sapiens OX=9606 GN=AP2A1 PE=1 SV=3	FHLC(BTD[C])SVATR|FHLC(BTD[C])SVATR	0.58	1.12	0.9	0.67	0.76	1.02	NA	0.91	1.02	NA	0.96	1.16	1.26	1.51	NA	0.99	0.68	1.12	0.88	0.58	1.17	1.31	NA	1.09	0.88	1.17	1.71	0.21	NA	0.2	0.15	NA	NA	1.46	NA	0.11	0.79	NA	NA	NA	NA	NA	NA	NA	NA
O95782	171	AP2A1	AP2A1_HUMAN AP-2 complex subunit alpha-1 OS=Homo sapiens OX=9606 GN=AP2A1 PE=1 SV=3	QSAALC(BTD[C])LLR|	0.51	NA	NA	NA	NA	1.12	NA	NA	NA	NA	NA	NA	NA	NA	NA	NA	NA	NA	NA	NA	NA	NA	NA	NA	NA	NA	NA	NA	NA	NA	NA	NA	NA	NA	NA	NA	NA	NA	NA	NA	NA	NA	NA	NA	NA
O95782	941	AP2A1	AP2A1_HUMAN AP-2 complex subunit alpha-1 OS=Homo sapiens OX=9606 GN=AP2A1 PE=1 SV=3	ALQVGC(BTD[C])LLR|	NA	NA	NA	NA	NA	NA	NA	0.57	NA	NA	NA	NA	NA	NA	NA	1.12	0.54	0.93	0.73	NA	NA	NA	NA	NA	NA	NA	NA	NA	NA	NA	NA	NA	NA	NA	NA	NA	NA	NA	NA	NA	NA	NA	NA	NA	NA
O95782	331	AP2A1	AP2A1_HUMAN AP-2 complex subunit alpha-1 OS=Homo sapiens OX=9606 GN=AP2A1 PE=1 SV=3	|AC(BTD[C])NQLGQFLQHR	NA	NA	NA	NA	NA	NA	NA	NA	NA	NA	1.05	NA	NA	NA	NA	NA	NA	NA	NA	NA	NA	NA	NA	NA	NA	NA	NA	NA	NA	NA	0.35	NA	NA	NA	NA	NA	NA	NA	NA	NA	NA	NA	NA	NA	NA
O95782	225	AP2A1	AP2A1_HUMAN AP-2 complex subunit alpha-1 OS=Homo sapiens OX=9606 GN=AP2A1 PE=1 SV=3	|TC(BTD[C])VSLAVSR	NA	NA	NA	NA	NA	NA	NA	NA	NA	NA	NA	NA	NA	NA	NA	NA	0.91	NA	1.13	NA	NA	NA	NA	0.74	NA	NA	3.21	0.46	NA	NA	0.21	NA	NA	NA	NA	NA	NA	NA	NA	NA	NA	NA	NA	NA	NA
O95782	397	AP2A1	AP2A1_HUMAN AP-2 complex subunit alpha-1 OS=Homo sapiens OX=9606 GN=AP2A1 PE=1 SV=3	|AADLLYAMC(BTD[C])DR	NA	NA	NA	NA	NA	NA	NA	NA	NA	NA	NA	NA	NA	NA	NA	NA	NA	NA	NA	NA	1.77	NA	NA	NA	1.18	NA	NA	NA	NA	NA	NA	NA	NA	NA	NA	NA	NA	NA	NA	NA	NA	NA	NA	NA	NA
O95782	283	AP2A1	AP2A1_HUMAN AP-2 complex subunit alpha-1 OS=Homo sapiens OX=9606 GN=AP2A1 PE=1 SV=3	LVEC(BTD[C])LETVLNK|	NA	NA	NA	NA	NA	NA	NA	NA	NA	NA	NA	NA	NA	NA	NA	NA	0.81	NA	NA	NA	1.26	NA	NA	0.9	1.16	NA	NA	NA	NA	NA	NA	NA	NA	NA	NA	NA	NA	NA	NA	NA	NA	0.62	NA	NA	NA
O95782	267	AP2A1	AP2A1_HUMAN AP-2 complex subunit alpha-1 OS=Homo sapiens OX=9606 GN=AP2A1 PE=1 SV=3	LLQC(BTD[C])YPPPEDAAVK|LLQC(BTD[C])YPPPEDAAVK	NA	NA	NA	NA	NA	NA	NA	NA	NA	NA	NA	0.88	NA	NA	NA	0.88	NA	NA	NA	NA	1.19	NA	NA	0.95	0.92	NA	NA	NA	NA	NA	NA	NA	NA	NA	NA	NA	NA	NA	NA	NA	NA	NA	NA	NA	NA
O95785	1279	WIZ	WIZ_HUMAN Protein Wiz OS=Homo sapiens OX=9606 GN=WIZ PE=1 SV=2	SKPC(BTD[C])LIK|	NA	NA	NA	NA	NA	NA	NA	0.23	NA	NA	NA	NA	NA	NA	NA	NA	0.54	NA	NA	NA	NA	NA	NA	NA	NA	NA	NA	NA	NA	NA	NA	NA	NA	NA	NA	NA	NA	NA	NA	NA	NA	NA	NA	NA	NA
O95786	738	DDX58	DDX58_HUMAN Probable ATP-dependent RNA helicase DDX58 OS=Homo sapiens OX=9606 GN=DDX58 PE=1 SV=2	|GSKC(BTD[C])FLLTSNAGVIEK	NA	NA	NA	NA	NA	NA	NA	NA	NA	NA	NA	NA	NA	NA	NA	NA	NA	NA	NA	NA	NA	NA	NA	NA	NA	NA	NA	NA	NA	NA	NA	NA	NA	NA	NA	NA	NA	NA	NA	NA	NA	NA	NA	NA	NA
O95786	841	DDX58	DDX58_HUMAN Probable ATP-dependent RNA helicase DDX58 OS=Homo sapiens OX=9606 GN=DDX58 PE=1 SV=2	|EC(BTD[C])FVSRPHPK	NA	NA	NA	NA	NA	NA	NA	NA	NA	NA	NA	NA	NA	NA	NA	NA	NA	NA	NA	NA	NA	NA	NA	NA	NA	NA	NA	NA	NA	NA	NA	NA	NA	NA	NA	NA	NA	NA	NA	NA	NA	NA	NA	NA	NA
O95793	574	STAU1	STAU1_HUMAN Double-stranded RNA-binding protein Staufen homolog 1 OS=Homo sapiens OX=9606 GN=STAU1 PE=1 SV=2	TGNGPMSVC(BTD[C])GR|	NA	NA	NA	NA	NA	1.23	NA	NA	NA	NA	NA	0.74	NA	NA	NA	0.67	0.59	NA	NA	NA	0.88	NA	NA	1.07	0.71	0.87	NA	NA	NA	NA	NA	NA	NA	NA	NA	NA	NA	NA	NA	NA	NA	NA	NA	NA	NA
O95793	541	STAU1	STAU1_HUMAN Double-stranded RNA-binding protein Staufen homolog 1 OS=Homo sapiens OX=9606 GN=STAU1 PE=1 SV=2	DVESC(BTD[C])HDMAALNILK|	NA	NA	NA	NA	NA	NA	NA	NA	NA	NA	NA	NA	NA	NA	NA	NA	NA	NA	NA	NA	NA	NA	NA	NA	NA	NA	NA	NA	NA	NA	NA	NA	NA	NA	NA	NA	NA	NA	NA	NA	NA	NA	NA	NA	NA
O95793	523	STAU1	STAU1_HUMAN Double-stranded RNA-binding protein Staufen homolog 1 OS=Homo sapiens OX=9606 GN=STAU1 PE=1 SV=2	NEFVSLINC(BTD[C])SSQPPLISHGIGK|	NA	NA	NA	NA	NA	NA	NA	NA	NA	NA	NA	NA	NA	NA	NA	NA	NA	NA	NA	NA	NA	NA	NA	1.04	0.78	NA	NA	NA	NA	NA	NA	NA	NA	NA	NA	NA	NA	NA	NA	NA	NA	NA	NA	NA	0.4
O95801	149	TTC4	TTC4_HUMAN Tetratricopeptide repeat protein 4 OS=Homo sapiens OX=9606 GN=TTC4 PE=1 SV=3	|LKPC(BTD[C])HLK	NA	3.02	1.01	NA	0.55	1.18	NA	0.43	1.35	NA	NA	0.97	NA	1.14	NA	0.91	0.98	NA	NA	NA	1.11	2.03	NA	NA	0.92	1.31	1.18	NA	NA	NA	NA	2.83	NA	1.1	1.6	NA	1.18	NA	NA	NA	NA	NA	NA	NA	NA
O95801	160	TTC4	TTC4_HUMAN Tetratricopeptide repeat protein 4 OS=Homo sapiens OX=9606 GN=TTC4 PE=1 SV=3	GALC(BTD[C])HLELK|	NA	NA	NA	NA	NA	NA	NA	NA	NA	NA	NA	1.35	NA	NA	NA	NA	1.24	NA	NA	NA	1.3	NA	NA	1.01	NA	NA	NA	NA	NA	NA	NA	NA	NA	NA	NA	NA	NA	NA	NA	NA	NA	NA	NA	NA	NA
O95810	136	CAVIN2	CAVN2_HUMAN Caveolae-associated protein 2 OS=Homo sapiens OX=9606 GN=CAVIN2 PE=1 SV=3	QC(BTD[C])AQVK|	NA	NA	NA	NA	NA	NA	NA	NA	NA	NA	NA	NA	NA	NA	NA	NA	0.61	NA	NA	NA	NA	NA	NA	0.61	0.73	NA	NA	NA	NA	NA	NA	NA	NA	NA	NA	NA	NA	NA	NA	NA	NA	NA	NA	NA	NA
O95816	162	BAG2	BAG2_HUMAN BAG family molecular chaperone regulator 2 OS=Homo sapiens OX=9606 GN=BAG2 PE=1 SV=1	FQSIVIGC(BTD[C])ALEDQKK|	NA	NA	NA	NA	NA	NA	NA	NA	NA	NA	NA	NA	0.6	NA	NA	0.75	NA	NA	0.44	NA	NA	NA	NA	NA	1	NA	NA	0.38	NA	NA	NA	NA	NA	NA	NA	0.14	NA	0.38	NA	0.36	0.52	0.52	0.57	0.42	0.84
O95817	179	BAG3	BAG3_HUMAN BAG family molecular chaperone regulator 3 OS=Homo sapiens OX=9606 GN=BAG3 PE=1 SV=3	SQSPAASDC(BTD[C])SSSSSSASLPSSGR|	NA	NA	NA	0.55	NA	NA	NA	NA	NA	NA	NA	NA	0.98	NA	NA	NA	NA	NA	0.67	NA	NA	NA	NA	NA	NA	NA	NA	NA	NA	NA	NA	NA	NA	NA	NA	NA	NA	NA	NA	NA	NA	NA	NA	NA	NA
O95817	151	BAG3	BAG3_HUMAN BAG family molecular chaperone regulator 3 OS=Homo sapiens OX=9606 GN=BAG3 PE=1 SV=3	|GMPETTQPDKQC(BTD[C])GQVAAAAAAQPPASHGPER	NA	NA	NA	NA	NA	NA	NA	NA	NA	NA	NA	NA	NA	NA	NA	NA	NA	NA	NA	NA	NA	NA	NA	NA	NA	NA	NA	NA	NA	NA	NA	1.75	NA	NA	NA	NA	NA	NA	NA	NA	NA	NA	NA	NA	NA
O95817	373	BAG3	BAG3_HUMAN BAG family molecular chaperone regulator 3 OS=Homo sapiens OX=9606 GN=BAG3 PE=1 SV=3	|VPPAPVPC(BTD[C])PPPSPGPSAVPSSPK	NA	NA	NA	NA	NA	NA	NA	NA	NA	NA	NA	NA	NA	NA	NA	NA	NA	NA	NA	NA	NA	NA	NA	NA	NA	NA	NA	NA	NA	NA	NA	NA	NA	NA	NA	NA	NA	NA	NA	NA	NA	NA	NA	NA	NA
O95825	40	CRYZL1	QORL1_HUMAN Quinone oxidoreductase-like protein 1 OS=Homo sapiens OX=9606 GN=CRYZL1 PE=1 SV=2	|AC(BTD[C])ALSQINTK	NA	NA	NA	0.47	NA	NA	NA	NA	NA	NA	NA	NA	NA	NA	NA	NA	NA	NA	NA	NA	NA	NA	NA	NA	NA	NA	NA	NA	NA	NA	NA	NA	NA	NA	NA	NA	NA	NA	NA	NA	NA	NA	NA	NA	NA
O95831	256	AIFM1	AIFM1_HUMAN Apoptosis-inducing factor 1, mitochondrial OS=Homo sapiens OX=9606 GN=AIFM1 PE=1 SV=1	LNDGSQITYEKC(BTD[C])LIATGGTPR|	NA	NA	NA	NA	NA	NA	NA	NA	NA	NA	NA	0.88	NA	NA	NA	NA	NA	NA	NA	NA	0.89	NA	NA	0.97	NA	0.78	NA	NA	NA	NA	0.36	NA	1.13	NA	NA	0.22	0.7	NA	NA	0.51	NA	NA	0.31	0.46	0.29
O95834	53	EML2	EMAL2_HUMAN Echinoderm microtubule-associated protein-like 2 OS=Homo sapiens OX=9606 GN=EML2 PE=1 SV=1	SELPSC(BTD[C])R|	NA	NA	NA	NA	NA	NA	NA	NA	NA	NA	NA	NA	NA	NA	NA	NA	NA	NA	NA	NA	NA	NA	NA	NA	NA	1.14	NA	NA	NA	NA	NA	NA	NA	NA	NA	NA	NA	NA	NA	NA	NA	NA	NA	NA	NA
O95834	395	EML2	EMAL2_HUMAN Echinoderm microtubule-associated protein-like 2 OS=Homo sapiens OX=9606 GN=EML2 PE=1 SV=1	|AQFVTC(BTD[C])GQDK	NA	NA	NA	NA	NA	NA	NA	NA	NA	NA	NA	NA	NA	NA	NA	NA	NA	NA	NA	NA	NA	NA	NA	NA	NA	1.13	NA	NA	NA	NA	NA	NA	NA	NA	NA	NA	NA	NA	NA	NA	NA	NA	NA	NA	NA
O95861	42	BPNT1	BPNT1_HUMAN 3'(2'),5'-bisphosphate nucleotidase 1 OS=Homo sapiens OX=9606 GN=BPNT1 PE=1 SV=1	TC(BTD[C])ATDLQTK|	NA	NA	1.09	NA	NA	1.47	4.06	NA	1.4	0.78	0.77	1.02	1.03	NA	0.98	1.24	0.86	1.04	NA	1.03	NA	NA	0.84	0.86	1	NA	1.32	NA	NA	NA	NA	NA	NA	0.85	NA	NA	NA	0.84	0.84	NA	NA	NA	NA	0.98	0.67
O95861	59	BPNT1	BPNT1_HUMAN 3'(2'),5'-bisphosphate nucleotidase 1 OS=Homo sapiens OX=9606 GN=BPNT1 PE=1 SV=1	|LAQMSIC(BTD[C])SSLAR	NA	NA	NA	NA	NA	NA	NA	0.75	NA	NA	NA	NA	NA	NA	NA	0.87	0.61	1.23	NA	NA	NA	NA	NA	0.81	0.76	NA	NA	0.51	NA	0.67	NA	NA	NA	NA	NA	NA	NA	1.03	NA	0.61	NA	0.79	NA	NA	0.34
O95865	176	DDAH2	DDAH2_HUMAN N(G),N(G)-dimethylarginine dimethylaminohydrolase 2 OS=Homo sapiens OX=9606 GN=DDAH2 PE=1 SV=1	GLC(BTD[C])GMGGPR|	NA	NA	NA	NA	NA	NA	NA	NA	NA	NA	NA	NA	NA	NA	NA	NA	0.92	NA	NA	NA	NA	NA	NA	NA	NA	NA	NA	NA	NA	NA	NA	NA	NA	NA	NA	NA	NA	NA	NA	NA	NA	NA	NA	NA	NA
O95870	416	ABHD16A	ABHGA_HUMAN Phosphatidylserine lipase ABHD16A OS=Homo sapiens OX=9606 GN=ABHD16A PE=1 SV=3	QHLNLNNAEQLC(BTD[C])R|	NA	1.71	NA	NA	NA	NA	NA	NA	NA	NA	NA	NA	NA	NA	NA	NA	NA	NA	NA	NA	NA	NA	NA	NA	NA	NA	NA	NA	NA	NA	NA	NA	NA	NA	NA	NA	NA	NA	NA	NA	NA	NA	NA	NA	NA
O95881	69	TXNDC12	TXD12_HUMAN Thioredoxin domain-containing protein 12 OS=Homo sapiens OX=9606 GN=TXNDC12 PE=1 SV=1	SWCGAC(BTD[C])K|	NA	2.12	NA	NA	NA	1.28	NA	NA	NA	NA	NA	NA	NA	NA	NA	NA	0.31	NA	NA	NA	NA	1.62	NA	NA	NA	NA	NA	NA	NA	NA	NA	NA	NA	NA	NA	NA	NA	NA	NA	NA	NA	NA	NA	NA	NA
O95881	66	TXNDC12	TXD12_HUMAN Thioredoxin domain-containing protein 12 OS=Homo sapiens OX=9606 GN=TXNDC12 PE=1 SV=1	SWC(BTD[C])GACK|	NA	NA	NA	NA	NA	NA	NA	NA	NA	NA	NA	NA	NA	NA	NA	NA	NA	NA	NA	NA	NA	NA	NA	NA	NA	NA	NA	NA	NA	NA	NA	NA	NA	NA	NA	NA	NA	NA	NA	NA	NA	NA	NA	NA	NA
O95886	791	DLGAP3	DLGP3_HUMAN Disks large-associated protein 3 OS=Homo sapiens OX=9606 GN=DLGAP3 PE=1 SV=3	|ASPC(BTD[C])PR	NA	NA	NA	NA	NA	NA	NA	NA	NA	NA	NA	NA	NA	NA	1.18	NA	NA	NA	NA	NA	NA	NA	NA	NA	NA	NA	NA	NA	NA	NA	NA	NA	1.17	NA	NA	NA	NA	NA	NA	NA	NA	NA	NA	NA	NA
O95905	312	ECD	ECD_HUMAN Protein ecdysoneless homolog OS=Homo sapiens OX=9606 GN=ECD PE=1 SV=1	LAHGFEILC(BTD[C])SK|	NA	NA	NA	NA	NA	NA	NA	NA	NA	NA	NA	NA	NA	NA	NA	NA	NA	NA	NA	NA	NA	NA	NA	NA	1.39	NA	NA	NA	NA	NA	NA	NA	NA	NA	NA	NA	NA	NA	NA	NA	NA	NA	NA	NA	NA
O95926	88	SYF2	SYF2_HUMAN Pre-mRNA-splicing factor SYF2 OS=Homo sapiens OX=9606 GN=SYF2 PE=1 SV=1	|KEC(BTD[C])AAR	NA	NA	NA	NA	NA	NA	NA	NA	NA	NA	NA	NA	NA	NA	NA	NA	NA	NA	NA	NA	NA	NA	NA	NA	NA	NA	NA	NA	NA	1.07	NA	NA	NA	0.62	NA	NA	NA	NA	NA	0.77	NA	0.96	NA	0.91	1.14
O95970	260	LGI1	LGI1_HUMAN Leucine-rich glioma-inactivated protein 1 OS=Homo sapiens OX=9606 GN=LGI1 PE=1 SV=1	C(BTD[C])IFLEWDHVEK|	NA	NA	NA	NA	NA	NA	NA	NA	NA	NA	NA	NA	NA	NA	NA	NA	NA	NA	NA	NA	NA	NA	NA	NA	NA	NA	NA	NA	NA	NA	NA	NA	NA	NA	NA	NA	NA	NA	NA	NA	NA	NA	NA	NA	NA
O95983	215	MBD3	MBD3_HUMAN Methyl-CpG-binding domain protein 3 OS=Homo sapiens OX=9606 GN=MBD3 PE=1 SV=1	NPGVWLNTTQPLC(BTD[C])K|	NA	NA	NA	NA	NA	NA	NA	0.32	NA	NA	NA	NA	NA	NA	NA	NA	NA	NA	NA	NA	NA	NA	NA	0.78	NA	NA	NA	NA	NA	NA	NA	NA	NA	NA	NA	NA	NA	NA	NA	NA	NA	NA	NA	NA	NA
O95985	190	TOP3B	TOP3B_HUMAN DNA topoisomerase 3-beta-1 OS=Homo sapiens OX=9606 GN=TOP3B PE=1 SV=1	IGC(BTD[C])AFTR|	NA	NA	NA	NA	NA	NA	NA	NA	NA	NA	NA	NA	NA	NA	NA	NA	NA	NA	NA	NA	NA	NA	NA	NA	NA	NA	NA	NA	NA	NA	NA	NA	NA	NA	NA	NA	NA	NA	NA	NA	NA	NA	NA	NA	NA
O96000	107	NDUFB10	NDUBA_HUMAN NADH dehydrogenase [ubiquinone] 1 beta subcomplex subunit 10 OS=Homo sapiens OX=9606 GN=NDUFB10 PE=1 SV=3	|LKAC(BTD[C])QQR	0.25	NA	NA	NA	NA	NA	NA	NA	NA	NA	NA	NA	NA	NA	NA	NA	NA	0.76	NA	NA	NA	NA	0.41	0.48	NA	NA	NA	NA	NA	NA	NA	NA	NA	NA	NA	NA	NA	NA	NA	NA	NA	NA	NA	NA	NA
O96000	119	NDUFB10	NDUBA_HUMAN NADH dehydrogenase [ubiquinone] 1 beta subcomplex subunit 10 OS=Homo sapiens OX=9606 GN=NDUFB10 PE=1 SV=3	EGQNYQQNC(BTD[C])IK|	NA	1.35	NA	0.72	NA	NA	NA	NA	NA	NA	NA	1	NA	NA	NA	0.66	NA	NA	NA	0.8	0.57	NA	NA	NA	NA	0.62	0.89	1.24	NA	NA	NA	1.35	NA	NA	NA	NA	NA	NA	NA	NA	NA	NA	NA	NA	NA
O96007	107	MOCS2	MOC2B_HUMAN Molybdopterin synthase catalytic subunit OS=Homo sapiens OX=9606 GN=MOCS2 PE=1 SV=1	KIC(BTD[C])SDIR|	0.43	2.75	0.82	NA	0.46	1.22	NA	0.77	1.27	NA	NA	1.02	0.74	NA	NA	0.87	0.58	1	0.59	0.46	0.95	NA	0.74	0.75	0.76	1	2.4	NA	NA	0.31	0.27	3.84	NA	NA	NA	0.35	0.67	NA	NA	0.32	0.3	0.28	0.67	0.54	0.34
O96008	74	TOMM40	TOM40_HUMAN Mitochondrial import receptor subunit TOM40 homolog OS=Homo sapiens OX=9606 GN=TOMM40 PE=1 SV=1	TPGAATASASGAAEDGAC(BTD[C])GCLPNPGTFEECHR|	NA	NA	NA	NA	NA	NA	NA	NA	NA	NA	NA	NA	NA	NA	NA	NA	NA	NA	NA	NA	0.9	NA	NA	NA	NA	NA	NA	NA	NA	3.69	1.22	NA	NA	NA	NA	NA	NA	NA	NA	NA	NA	NA	NA	NA	NA
O96008	86	TOMM40	TOM40_HUMAN Mitochondrial import receptor subunit TOM40 homolog OS=Homo sapiens OX=9606 GN=TOMM40 PE=1 SV=1	TPGAATASASGAAEDGACGCLPNPGTFEEC(BTD[C])HRK|	NA	NA	NA	NA	NA	NA	NA	NA	NA	NA	NA	NA	NA	NA	NA	NA	NA	NA	NA	NA	NA	NA	NA	NA	NA	NA	NA	NA	NA	NA	NA	NA	NA	1.24	NA	NA	NA	NA	NA	NA	NA	NA	NA	NA	NA
O96008	76	TOMM40	TOM40_HUMAN Mitochondrial import receptor subunit TOM40 homolog OS=Homo sapiens OX=9606 GN=TOMM40 PE=1 SV=1	TPGAATASASGAAEDGACGC(BTD[C])LPNPGTFEECHRK|	NA	NA	NA	NA	NA	NA	NA	NA	NA	NA	NA	NA	NA	NA	NA	NA	NA	NA	NA	NA	NA	NA	NA	NA	NA	NA	NA	NA	NA	NA	NA	NA	NA	NA	NA	NA	NA	NA	NA	NA	NA	NA	NA	NA	NA
O96011	25	PEX11B	PX11B_HUMAN Peroxisomal membrane protein 11B OS=Homo sapiens OX=9606 GN=PEX11B PE=1 SV=1	|AAQYAC(BTD[C])SLLGHALQR	NA	NA	NA	NA	NA	NA	NA	NA	NA	NA	NA	NA	NA	NA	NA	NA	NA	NA	NA	NA	NA	NA	NA	NA	NA	NA	NA	NA	NA	NA	NA	NA	NA	NA	NA	NA	NA	NA	NA	NA	NA	NA	NA	NA	NA
O96013	58	PAK4	PAK4_HUMAN Serine/threonine-protein kinase PAK 4 OS=Homo sapiens OX=9606 GN=PAK4 PE=1 SV=1	PLVDPAC(BTD[C])ITSIQPGAPK|	NA	NA	NA	NA	NA	NA	NA	NA	NA	NA	NA	0.91	NA	NA	NA	NA	NA	NA	NA	NA	NA	NA	NA	NA	1.05	NA	NA	NA	NA	NA	NA	NA	NA	NA	NA	NA	NA	NA	NA	NA	NA	NA	NA	NA	NA
O96013	336	PAK4	PAK4_HUMAN Serine/threonine-protein kinase PAK 4 OS=Homo sapiens OX=9606 GN=PAK4 PE=1 SV=1	IGEGSTGIVC(BTD[C])IATVR|	NA	NA	NA	NA	NA	NA	NA	NA	NA	NA	NA	NA	NA	NA	NA	NA	NA	NA	NA	NA	NA	NA	NA	NA	1.11	NA	NA	NA	NA	NA	NA	NA	NA	NA	NA	NA	NA	NA	NA	NA	NA	NA	NA	NA	NA
O96013	276	PAK4	PAK4_HUMAN Serine/threonine-protein kinase PAK 4 OS=Homo sapiens OX=9606 GN=PAK4 PE=1 SV=1	GAPSPGVLGPHASEPQLAPPAC(BTD[C])TPAAPAVPGPPGPR|	NA	NA	NA	NA	NA	NA	NA	NA	NA	NA	NA	NA	NA	NA	NA	NA	NA	NA	NA	NA	NA	NA	NA	NA	NA	NA	NA	NA	NA	NA	NA	NA	NA	NA	NA	NA	NA	NA	NA	NA	NA	NA	NA	NA	NA
O96017	539	CHEK2	CHK2_HUMAN Serine/threonine-protein kinase Chk2 OS=Homo sapiens OX=9606 GN=CHEK2 PE=1 SV=1	|RPAVC(BTD[C])AAVL	NA	NA	NA	NA	NA	NA	NA	NA	NA	NA	NA	NA	NA	1.2	1.04	NA	NA	NA	NA	NA	NA	NA	NA	NA	NA	NA	NA	NA	NA	NA	NA	0.87	NA	NA	NA	NA	NA	NA	NA	NA	NA	NA	NA	NA	NA
O96019	423	ACTL6A	ACL6A_HUMAN Actin-like protein 6A OS=Homo sapiens OX=9606 GN=ACTL6A PE=1 SV=1	|QEYEEGGKQC(BTD[C])VER	NA	NA	NA	NA	0.69	NA	NA	NA	NA	NA	NA	NA	NA	NA	NA	NA	NA	NA	NA	NA	NA	NA	NA	NA	NA	NA	NA	0.94	NA	NA	NA	NA	NA	NA	NA	NA	NA	NA	NA	0.41	1.55	NA	NA	NA	NA
O96019	32	ACTL6A	ACL6A_HUMAN Actin-like protein 6A OS=Homo sapiens OX=9606 GN=ACTL6A PE=1 SV=1	|AGYAGEDC(BTD[C])PK	0.44	3.25	0.95	NA	0.88	1.58	0.61	0.58	1.01	NA	0.68	1.26	0.77	NA	1.1	NA	0.66	1.32	0.65	NA	NA	2.44	0.63	0.92	0.97	1.09	2.08	0.95	NA	NA	NA	1.02	1	NA	NA	NA	0.59	0.49	1.07	NA	0.63	NA	NA	0.76	NA
O96019	206	ACTL6A	ACL6A_HUMAN Actin-like protein 6A OS=Homo sapiens OX=9606 GN=ACTL6A PE=1 SV=1	SPLAGDFITMQC(BTD[C])R|	NA	1.96	NA	0.5	1	NA	NA	NA	NA	NA	NA	1.67	NA	NA	NA	1.97	1	NA	0.7	NA	1.43	NA	NA	1.35	1.11	NA	NA	NA	NA	0.56	0.39	NA	NA	NA	NA	0.77	NA	NA	NA	0.47	0.65	1.11	0.52	0.72	0.73
O96028	594	NSD2	NSD2_HUMAN Histone-lysine N-methyltransferase NSD2 OS=Homo sapiens OX=9606 GN=NSD2 PE=1 SV=1	|NLSDAC(BTD[C])K	NA	NA	NA	NA	NA	NA	NA	NA	NA	NA	NA	NA	NA	NA	NA	1.24	0.84	NA	NA	NA	1.32	NA	NA	0.97	0.95	0.99	1.27	NA	NA	NA	NA	NA	NA	NA	NA	NA	NA	NA	NA	1.08	NA	NA	NA	1.16	NA
O96028	38	NSD2	NSD2_HUMAN Histone-lysine N-methyltransferase NSD2 OS=Homo sapiens OX=9606 GN=NSD2 PE=1 SV=1	|TPSC(BTD[C])EVNR	NA	NA	NA	NA	NA	NA	NA	NA	NA	NA	NA	NA	NA	NA	NA	NA	0.62	10.3	NA	NA	NA	NA	NA	NA	NA	NA	NA	NA	NA	NA	NA	NA	NA	NA	NA	NA	NA	NA	NA	NA	NA	NA	NA	NA	NA
O96028	207	NSD2	NSD2_HUMAN Histone-lysine N-methyltransferase NSD2 OS=Homo sapiens OX=9606 GN=NSD2 PE=1 SV=1	ESC(BTD[C])PNTGR|ESC(BTD[C])PNTGR	NA	NA	NA	NA	NA	NA	NA	NA	NA	NA	NA	NA	NA	NA	NA	NA	NA	NA	NA	NA	0.97	NA	NA	NA	NA	NA	NA	NA	NA	NA	NA	NA	NA	NA	NA	NA	NA	1.45	NA	NA	NA	NA	NA	NA	NA
O96028	294	NSD2	NSD2_HUMAN Histone-lysine N-methyltransferase NSD2 OS=Homo sapiens OX=9606 GN=NSD2 PE=1 SV=1	LC(BTD[C])QESAK|	NA	NA	NA	NA	NA	NA	NA	NA	NA	NA	NA	NA	NA	NA	NA	NA	0.95	NA	NA	NA	NA	NA	NA	NA	0.92	NA	NA	NA	NA	NA	NA	NA	NA	NA	NA	NA	NA	NA	NA	NA	NA	NA	NA	NA	NA
P00325	98	ADH1B	ADH1B_HUMAN All-trans-retinol dehydrogenase [NAD(+)] ADH1B OS=Homo sapiens OX=9606 GN=ADH1B PE=1 SV=2	VIPLFTPQC(BTD[C])GK|	NA	NA	NA	NA	NA	NA	NA	NA	NA	NA	NA	NA	NA	NA	NA	NA	NA	NA	NA	NA	NA	NA	NA	NA	NA	NA	NA	NA	NA	NA	NA	NA	NA	NA	NA	NA	NA	NA	NA	NA	NA	NA	NA	NA	NA
P00326	98	ADH1C	ADH1G_HUMAN Alcohol dehydrogenase 1C OS=Homo sapiens OX=9606 GN=ADH1C PE=1 SV=2	|VIPLFTPQC(BTD[C])GK	NA	NA	NA	NA	NA	NA	NA	NA	NA	NA	NA	NA	NA	NA	NA	NA	NA	NA	NA	NA	NA	NA	NA	NA	NA	NA	NA	NA	NA	NA	NA	NA	NA	NA	NA	NA	NA	NA	NA	NA	NA	NA	NA	NA	NA
P00338	131	LDHA	LDHA_HUMAN L-lactate dehydrogenase A chain OS=Homo sapiens OX=9606 GN=LDHA PE=1 SV=2	YSPNC(BTD[C])K|YSPNC(BTD[C])K	0.52	2.63	0.88	0.51	0.53	1.25	0.75	0.6	1.15	0.49	0.69	1.05	0.69	1.41	1.63	0.88	0.6	1.05	0.68	0.54	0.98	2.36	0.74	0.96	0.88	1.04	1.89	0.25	2.99	0.26	0.26	2.42	1.26	1.28	2.59	0.18	0.97	0.55	1.07	0.68	0.56	0.92	0.74	0.91	0.74
P00352	370	ALDH1A1	AL1A1_HUMAN Retinal dehydrogenase 1 OS=Homo sapiens OX=9606 GN=ALDH1A1 PE=1 SV=2	LEC(BTD[C])GGGPWGNK|	NA	3.34	0.97	0.49	0.63	1.34	NA	NA	1.17	0.6	0.71	1.04	0.65	1.03	1.37	0.96	0.78	1.21	0.57	0.44	0.54	2.18	0.65	0.98	0.82	0.6	2.25	0.92	NA	NA	NA	NA	1.54	1.07	1.14	NA	1.09	0.58	0.99	0.66	NA	0.96	NA	0.77	0.61
P00352	133	ALDH1A1	AL1A1_HUMAN Retinal dehydrogenase 1 OS=Homo sapiens OX=9606 GN=ALDH1A1 PE=1 SV=2	YC(BTD[C])AGWADK|	NA	1.18	1.21	0.39	NA	NA	1.04	0.85	NA	0.48	NA	1.41	0.68	NA	1.05	1.26	0.67	1.27	0.7	0.43	0.83	0.81	NA	0.99	1.02	0.83	NA	NA	NA	NA	NA	NA	NA	1.04	1.3	NA	1.03	0.55	NA	NA	NA	0.85	NA	NA	NA
P00352	186	ALDH1A1	AL1A1_HUMAN Retinal dehydrogenase 1 OS=Homo sapiens OX=9606 GN=ALDH1A1 PE=1 SV=2	IGPALSC(BTD[C])GNTVVVK|IGPALSC(BTD[C])GNTVVVK	NA	1.85	0.67	0.42	NA	0.92	NA	NA	0.54	NA	0.9	0.71	NA	0.66	0.85	0.74	0.85	0.86	0.76	0.53	0.55	1.45	NA	0.88	0.59	0.53	1.55	0.7	NA	NA	NA	1.44	1.12	1.13	0.77	NA	0.89	0.8	0.82	0.65	0.96	0.74	NA	0.86	0.86
P00352	126	ALDH1A1	AL1A1_HUMAN Retinal dehydrogenase 1 OS=Homo sapiens OX=9606 GN=ALDH1A1 PE=1 SV=2	LYSNAYLNDLAGC(BTD[C])IK|	NA	NA	NA	NA	NA	NA	NA	NA	NA	NA	NA	NA	NA	NA	NA	NA	0.82	NA	NA	NA	0.75	NA	NA	NA	0.97	NA	NA	NA	NA	NA	NA	NA	NA	NA	NA	NA	NA	NA	NA	NA	NA	NA	NA	NA	NA
P00352	50	ALDH1A1	AL1A1_HUMAN Retinal dehydrogenase 1 OS=Homo sapiens OX=9606 GN=ALDH1A1 PE=1 SV=2	KFPVFNPATEEELC(BTD[C])QVEEGDKEDVDK|	NA	NA	NA	NA	NA	NA	NA	NA	NA	NA	NA	NA	NA	NA	NA	1.28	1.03	NA	NA	NA	0.73	NA	NA	1.25	1.25	1.05	NA	NA	NA	NA	NA	NA	NA	NA	NA	NA	NA	0.09	NA	NA	NA	NA	NA	NA	NA
P00367	376	GLUD1	DHE3_HUMAN Glutamate dehydrogenase 1, mitochondrial OS=Homo sapiens OX=9606 GN=GLUD1 PE=1 SV=2	AKPYEGSILEADC(BTD[C])DILIPAASEK|	NA	NA	NA	NA	NA	NA	NA	NA	NA	NA	NA	NA	NA	NA	NA	0.93	0.7	NA	NA	NA	0.98	NA	NA	1	NA	0.93	NA	0.13	NA	NA	NA	NA	NA	NA	NA	NA	1.08	0.52	NA	0.48	0.41	0.56	0.44	0.66	0.5
P00387	204	CYB5R3	NB5R3_HUMAN NADH-cytochrome b5 reductase 3 OS=Homo sapiens OX=9606 GN=CYB5R3 PE=1 SV=3	DPDDHTVC(BTD[C])HLLFANQTEK|	NA	NA	NA	NA	NA	NA	NA	NA	NA	NA	NA	NA	0.96	NA	NA	1.22	NA	NA	NA	NA	1.76	NA	NA	1.77	NA	1.13	NA	NA	NA	NA	NA	NA	NA	NA	NA	NA	NA	NA	NA	0.61	0.89	NA	NA	0.93	0.7
P00390	467	GSR	GSHR_HUMAN Glutathione reductase, mitochondrial OS=Homo sapiens OX=9606 GN=GSR PE=1 SV=2	MVC(BTD[C])ANKEEK|	0.42	NA	0.66	NA	NA	1.44	NA	0.61	0.9	NA	NA	1.17	NA	NA	NA	0.92	0.54	1.04	NA	NA	0.8	NA	NA	0.94	0.76	0.8	2.15	NA	NA	NA	NA	NA	NA	NA	NA	0.22	NA	NA	NA	0.37	NA	NA	NA	NA	NA
P00390	461	GSR	GSHR_HUMAN Glutathione reductase, mitochondrial OS=Homo sapiens OX=9606 GN=GSR PE=1 SV=2	TKC(BTD[C])VMK|	NA	1.09	NA	NA	NA	NA	NA	NA	1.02	NA	NA	0.94	NA	NA	NA	0.74	0.57	NA	NA	NA	0.98	NA	NA	NA	0.77	0.69	NA	NA	NA	NA	NA	NA	NA	NA	NA	0.19	NA	NA	NA	NA	NA	NA	NA	NA	NA
P00390	107	GSR	GSHR_HUMAN Glutathione reductase, mitochondrial OS=Homo sapiens OX=9606 GN=GSR PE=1 SV=2	LGGTCVNVGC(BTD[C])VPK|LGGTCVNVGC(BTD[C])VPK	NA	NA	NA	NA	NA	NA	NA	NA	NA	NA	NA	NA	NA	NA	NA	NA	0.85	NA	NA	NA	0.46	NA	NA	NA	NA	0.7	NA	NA	NA	NA	NA	NA	NA	NA	NA	0.46	NA	NA	NA	NA	NA	NA	NA	NA	NA
P00390	102	GSR	GSHR_HUMAN Glutathione reductase, mitochondrial OS=Homo sapiens OX=9606 GN=GSR PE=1 SV=2	|LGGTC(BTD[C])VNVGCVPK	NA	NA	NA	NA	NA	NA	NA	NA	NA	NA	NA	NA	NA	NA	NA	NA	NA	NA	NA	NA	NA	NA	NA	NA	NA	0.43	NA	NA	NA	NA	NA	NA	NA	NA	NA	NA	NA	NA	NA	NA	NA	NA	NA	NA	NA
P00390	377	GSR	GSHR_HUMAN Glutathione reductase, mitochondrial OS=Homo sapiens OX=9606 GN=GSR PE=1 SV=2	|GIYAVGDVC(BTD[C])GK	NA	NA	NA	NA	NA	NA	NA	NA	NA	NA	NA	NA	NA	NA	NA	NA	0.91	NA	NA	NA	NA	NA	NA	NA	NA	NA	NA	NA	NA	NA	NA	NA	NA	NA	NA	NA	NA	NA	NA	NA	NA	NA	NA	NA	NA
P00441	7	SOD1	SODC_HUMAN Superoxide dismutase [Cu-Zn] OS=Homo sapiens OX=9606 GN=SOD1 PE=1 SV=2	AVC(BTD[C])VLK|AVC(BTD[C])VLK	0.39	NA	NA	NA	NA	NA	0.63	0.68	NA	0.77	NA	NA	NA	NA	NA	NA	NA	NA	NA	NA	NA	NA	NA	NA	NA	NA	NA	NA	NA	NA	NA	NA	NA	NA	NA	NA	NA	NA	NA	NA	NA	NA	NA	NA	NA
P00441	147	SOD1	SODC_HUMAN Superoxide dismutase [Cu-Zn] OS=Homo sapiens OX=9606 GN=SOD1 PE=1 SV=2	LAC(BTD[C])GVIGIAQ|	NA	NA	NA	NA	NA	NA	NA	0.87	NA	0.48	NA	NA	NA	NA	NA	NA	NA	NA	NA	NA	NA	NA	1.1	NA	NA	NA	NA	NA	NA	NA	NA	NA	NA	NA	NA	NA	NA	NA	NA	NA	NA	NA	NA	NA	NA
P00491	78	PNP	PNPH_HUMAN Purine nucleoside phosphorylase OS=Homo sapiens OX=9606 GN=PNP PE=1 SV=2	AC(BTD[C])VMMQGR|AC(BTD[C])VMMQGR	0.87	1.97	1.03	0.49	0.92	1.36	0.96	0.86	1.42	0.4	0.85	1.28	0.77	NA	2.18	1.09	0.65	1.11	0.75	0.48	1.23	1.56	0.93	1.03	0.99	1.13	2.34	0.27	1.23	0.44	0.34	2.47	1.23	1.14	NA	0.25	1.17	0.44	1.11	0.54	0.54	0.76	0.63	0.84	0.59
P00491	31	PNP	PNPH_HUMAN Purine nucleoside phosphorylase OS=Homo sapiens OX=9606 GN=PNP PE=1 SV=2	|IIC(BTD[C])GSGLGGLTDK	NA	NA	NA	NA	NA	NA	NA	NA	NA	NA	NA	0.82	NA	NA	NA	0.92	0.62	NA	NA	NA	1	NA	NA	0.88	0.8	1.53	NA	NA	NA	NA	NA	NA	NA	1.1	1.67	NA	0.64	NA	NA	0.38	0.27	NA	0.26	0.9	0.32
P00492	106	HPRT1	HPRT_HUMAN Hypoxanthine-guanine phosphoribosyltransferase OS=Homo sapiens OX=9606 GN=HPRT1 PE=1 SV=2	SYC(BTD[C])NDQSTGDIK|SYC(BTD[C])NDQSTGDIK	0.54	3.02	1.08	NA	0.51	0.98	0.74	0.59	0.95	NA	0.87	0.96	1.01	1.03	1.24	0.86	0.82	1.06	0.66	0.45	0.97	2.59	0.71	1	NA	0.87	1.2	NA	NA	NA	NA	2.46	1.21	1	1.1	NA	0.76	0.87	0.92	NA	NA	0.77	NA	1.03	0.98
P00492	206	HPRT1	HPRT_HUMAN Hypoxanthine-guanine phosphoribosyltransferase OS=Homo sapiens OX=9606 GN=HPRT1 PE=1 SV=2	DLNHVC(BTD[C])VISETGK|	0.41	2	NA	0.38	NA	1.11	0.97	0.81	NA	NA	NA	0.96	1.27	NA	NA	0.9	0.7	0.95	0.78	NA	1.34	NA	1.08	1.06	NA	0.93	1.16	NA	1.15	0.13	NA	NA	1.07	NA	NA	0.25	NA	NA	NA	NA	0.34	NA	NA	NA	NA
P00505	295	GOT2	AATM_HUMAN Aspartate aminotransferase, mitochondrial OS=Homo sapiens OX=9606 GN=GOT2 PE=1 SV=3	VGAFTMVC(BTD[C])K|	0.83	1.67	0.97	0.61	0.74	1.21	1.13	0.91	1.63	0.41	0.73	1.53	0.99	NA	NA	0.97	0.65	NA	0.95	0.61	0.87	1.5	1.17	0.99	1.08	0.99	2.29	0.19	0.83	0.14	0.12	2.05	1.44	NA	NA	0.08	0.35	NA	NA	NA	NA	NA	NA	1.05	NA
P00505	187	GOT2	AATM_HUMAN Aspartate aminotransferase, mitochondrial OS=Homo sapiens OX=9606 GN=GOT2 PE=1 SV=3	TC(BTD[C])GFDFTGAVEDISK|	NA	NA	NA	NA	NA	NA	1.06	0.71	NA	NA	NA	NA	NA	NA	NA	NA	NA	NA	NA	NA	NA	NA	NA	NA	NA	NA	NA	NA	NA	NA	NA	NA	NA	NA	NA	NA	NA	0.55	NA	0.69	NA	1.07	NA	0.92	0.62
P00505	212	GOT2	AATM_HUMAN Aspartate aminotransferase, mitochondrial OS=Homo sapiens OX=9606 GN=GOT2 PE=1 SV=3	IPEQSVLLLHAC(BTD[C])AHNPTGVDPRPEQWK|	NA	NA	NA	NA	NA	NA	NA	NA	NA	NA	NA	NA	NA	NA	NA	NA	NA	NA	NA	NA	NA	NA	NA	NA	NA	NA	NA	NA	NA	NA	NA	NA	NA	NA	2.63	0.49	NA	NA	NA	NA	0.45	NA	NA	NA	0.62
P00505	106	GOT2	AATM_HUMAN Aspartate aminotransferase, mitochondrial OS=Homo sapiens OX=9606 GN=GOT2 PE=1 SV=3	|NLDKEYLPIGGLAEFC(BTD[C])K	NA	NA	NA	NA	NA	NA	NA	NA	NA	NA	NA	NA	NA	NA	NA	NA	NA	NA	NA	NA	NA	NA	NA	NA	NA	NA	NA	NA	NA	NA	NA	NA	NA	NA	NA	NA	NA	NA	NA	0.35	NA	0.34	NA	NA	NA
P00533	31	EGFR	EGFR_HUMAN Epidermal growth factor receptor OS=Homo sapiens OX=9606 GN=EGFR PE=1 SV=2	|KVC(BTD[C])QGTSNK VC(BTD[C])QGTSNK	0.24	1.55	0.44	0.59	0.33	1	0.44	NA	0.47	0.39	NA	0.83	1.36	NA	NA	0.95	0.45	NA	1.15	0.89	0.51	0.96	0.46	0.37	0.36	0.43	0.87	NA	4.15	NA	NA	NA	NA	0.89	1.12	NA	0.78	0.55	NA	0.83	NA	NA	NA	NA	0.7
P00533	219	EGFR	EGFR_HUMAN Epidermal growth factor receptor OS=Homo sapiens OX=9606 GN=EGFR PE=1 SV=2	IICAQQC(BTD[C])SGR|	NA	NA	NA	1.32	NA	NA	NA	NA	NA	NA	NA	NA	1.31	NA	NA	NA	NA	NA	NA	0.96	0.71	NA	NA	NA	0.81	0.66	NA	NA	NA	NA	NA	NA	NA	NA	NA	NA	NA	NA	NA	NA	NA	NA	NA	NA	NA
P00533	260	EGFR	EGFR_HUMAN Epidermal growth factor receptor OS=Homo sapiens OX=9606 GN=EGFR PE=1 SV=2	FRDEATC(BTD[C])K|	NA	1.16	NA	NA	NA	1.19	NA	NA	0.85	NA	NA	0.93	NA	NA	NA	1.05	NA	NA	NA	NA	1.13	NA	NA	0.78	NA	NA	NA	NA	NA	NA	NA	NA	NA	NA	NA	NA	NA	NA	NA	NA	NA	NA	NA	NA	NA
P00533	307	EGFR	EGFR_HUMAN Epidermal growth factor receptor OS=Homo sapiens OX=9606 GN=EGFR PE=1 SV=2	NYVVTDHGSC(BTD[C])VR|	NA	1.16	0.87	NA	NA	1.09	NA	NA	NA	NA	NA	NA	NA	NA	NA	NA	0.97	NA	NA	NA	1.16	NA	NA	0.88	0.97	NA	NA	NA	NA	NA	NA	NA	NA	NA	NA	NA	NA	NA	NA	NA	NA	NA	NA	NA	NA
P00533	337	EGFR	EGFR_HUMAN Epidermal growth factor receptor OS=Homo sapiens OX=9606 GN=EGFR PE=1 SV=2	KVC(BTD[C])NGIGIGEFK|	NA	1.37	0.98	NA	NA	0.71	NA	NA	NA	NA	0.81	NA	NA	NA	NA	1.03	1.12	0.8	NA	NA	1.52	NA	NA	1.17	NA	NA	NA	NA	NA	NA	NA	NA	NA	NA	NA	NA	NA	NA	NA	NA	NA	NA	NA	NA	NA
P00533	329	EGFR	EGFR_HUMAN Epidermal growth factor receptor OS=Homo sapiens OX=9606 GN=EGFR PE=1 SV=2	KC(BTD[C])EGPCR|	NA	NA	0.79	NA	NA	NA	NA	1.04	NA	NA	NA	NA	NA	NA	NA	0.61	NA	NA	NA	0.51	0.68	NA	NA	NA	NA	NA	NA	NA	NA	NA	NA	NA	NA	NA	NA	NA	NA	NA	NA	NA	0.75	NA	1.22	0.69	NA
P00533	1058	EGFR	EGFR_HUMAN Epidermal growth factor receptor OS=Homo sapiens OX=9606 GN=EGFR PE=1 SV=2	NGLQSC(BTD[C])PIK|	NA	NA	NA	NA	NA	NA	NA	NA	NA	NA	NA	NA	NA	NA	NA	1	NA	NA	1.06	NA	NA	NA	NA	NA	NA	NA	NA	NA	NA	NA	NA	1.94	NA	NA	NA	NA	NA	NA	NA	NA	NA	NA	NA	NA	NA
P00533	215	EGFR	EGFR_HUMAN Epidermal growth factor receptor OS=Homo sapiens OX=9606 GN=EGFR PE=1 SV=2	IIC(BTD[C])AQQCSGR|	NA	NA	NA	NA	NA	NA	NA	NA	NA	NA	NA	NA	NA	NA	NA	NA	NA	NA	NA	NA	NA	NA	NA	NA	NA	NA	NA	NA	NA	NA	NA	NA	NA	NA	NA	NA	NA	NA	NA	NA	NA	NA	NA	NA	NA
P00533	291	EGFR	EGFR_HUMAN Epidermal growth factor receptor OS=Homo sapiens OX=9606 GN=EGFR PE=1 SV=2	|YSFGATC(BTD[C])VK	NA	NA	NA	NA	NA	NA	NA	NA	NA	NA	NA	NA	NA	NA	NA	NA	NA	NA	NA	NA	NA	NA	NA	NA	0.73	NA	NA	NA	NA	NA	NA	NA	NA	NA	NA	NA	NA	NA	NA	NA	NA	NA	NA	NA	NA
P00558	99	PGK1	PGK1_HUMAN Phosphoglycerate kinase 1 OS=Homo sapiens OX=9606 GN=PGK1 PE=1 SV=3	DVLFLKDC(BTD[C])VGPEVEK|	1.18	1.63	0.99	0.71	0.78	NA	1.01	0.89	1.05	0.96	0.9	1.15	1.01	NA	0.44	1	0.7	NA	NA	NA	1.68	2.21	NA	1.02	1.03	1.3	NA	1.21	1.26	NA	NA	NA	NA	NA	NA	NA	NA	0.67	NA	0.4	NA	0.93	0.65	0.71	0.83
P00558	316	PGK1	PGK1_HUMAN Phosphoglycerate kinase 1 OS=Homo sapiens OX=9606 GN=PGK1 PE=1 SV=3	TGQATVASGIPAGWMGLDC(BTD[C])GPESSKK|	NA	NA	NA	NA	1.05	NA	1.49	1.26	NA	0.51	NA	1.23	NA	NA	NA	1.06	0.8	NA	NA	NA	1.07	NA	1.3	1.15	0.99	1.05	NA	NA	NA	0.47	0.37	NA	NA	NA	NA	0.27	NA	NA	NA	NA	NA	NA	NA	NA	NA
P00558	50	PGK1	PGK1_HUMAN Phosphoglycerate kinase 1 OS=Homo sapiens OX=9606 GN=PGK1 PE=1 SV=3	FC(BTD[C])LDNGAK|	0.84	2.07	1.44	0.36	0.74	NA	1.47	1	1.88	0.49	0.94	2.14	0.99	NA	NA	1.33	0.91	1.5	0.73	0.48	1.86	1.62	1.24	1.35	1.56	1.73	5.38	NA	0.7	0.92	NA	NA	NA	1	NA	0.29	NA	0.47	1.02	0.57	NA	0.73	NA	NA	NA
P00558	367	PGK1	PGK1_HUMAN Phosphoglycerate kinase 1 OS=Homo sapiens OX=9606 GN=PGK1 PE=1 SV=3	GC(BTD[C])ITIIGGGDTATCCAK|	NA	NA	NA	NA	NA	NA	NA	NA	NA	NA	NA	2.07	NA	NA	NA	1.42	NA	NA	NA	NA	1	NA	NA	NA	NA	NA	NA	NA	NA	1.07	0.44	NA	NA	NA	NA	0.39	NA	NA	NA	NA	NA	NA	NA	NA	NA
P00558	108	PGK1	PGK1_HUMAN Phosphoglycerate kinase 1 OS=Homo sapiens OX=9606 GN=PGK1 PE=1 SV=3	AC(BTD[C])ANPAAGSVILLENLR|	NA	NA	NA	NA	0.72	NA	0.92	0.75	NA	NA	NA	NA	NA	NA	NA	NA	NA	NA	NA	NA	NA	NA	NA	NA	NA	NA	NA	NA	NA	NA	NA	NA	NA	NA	NA	NA	NA	NA	NA	NA	NA	NA	NA	NA	NA
P00558	380	PGK1	PGK1_HUMAN Phosphoglycerate kinase 1 OS=Homo sapiens OX=9606 GN=PGK1 PE=1 SV=3	GCITIIGGGDTATCC(BTD[C])AK|	NA	NA	NA	NA	NA	NA	NA	NA	NA	NA	NA	NA	1.28	NA	NA	NA	NA	NA	NA	NA	NA	NA	NA	NA	NA	NA	NA	NA	NA	NA	NA	NA	NA	NA	NA	NA	NA	NA	NA	NA	NA	NA	NA	NA	NA
P00558	379	PGK1	PGK1_HUMAN Phosphoglycerate kinase 1 OS=Homo sapiens OX=9606 GN=PGK1 PE=1 SV=3	GCITIIGGGDTATC(BTD[C])CAK|	NA	NA	NA	NA	NA	NA	NA	NA	NA	NA	NA	NA	NA	NA	NA	NA	NA	NA	NA	NA	0.97	NA	NA	NA	NA	NA	NA	NA	NA	NA	NA	NA	NA	NA	NA	NA	NA	NA	NA	NA	NA	NA	NA	NA	NA
P00568	25	AK1	KAD1_HUMAN Adenylate kinase isoenzyme 1 OS=Homo sapiens OX=9606 GN=AK1 PE=1 SV=3	GTQC(BTD[C])EK|	NA	NA	NA	NA	NA	NA	NA	NA	NA	NA	NA	NA	NA	NA	NA	NA	NA	NA	NA	NA	NA	NA	NA	0.74	NA	NA	NA	NA	NA	NA	NA	NA	1.09	NA	NA	NA	NA	NA	NA	NA	NA	NA	NA	NA	NA
P00749	345	PLAU	UROK_HUMAN Urokinase-type plasminogen activator OS=Homo sapiens OX=9606 GN=PLAU PE=1 SV=2	EC(BTD[C])QQPHYYGSEVTTK|	NA	NA	NA	0.84	0.48	NA	NA	0.61	NA	NA	NA	1.43	1.14	NA	NA	NA	NA	NA	0.79	0.89	NA	NA	0.66	NA	1.08	1	NA	1.99	NA	NA	NA	NA	NA	NA	NA	NA	NA	0.78	NA	1.05	NA	NA	NA	NA	NA
P01024	873	C3	CO3_HUMAN Complement C3 OS=Homo sapiens OX=9606 GN=C3 PE=1 SV=2	VELLHNPAFC(BTD[C])SLATTK|VELLHNPAFC(BTD[C])SLATTK	NA	NA	NA	NA	NA	NA	NA	NA	NA	NA	NA	NA	NA	NA	NA	NA	NA	NA	NA	NA	NA	NA	NA	NA	NA	NA	NA	NA	NA	NA	NA	NA	NA	NA	NA	NA	NA	NA	NA	NA	NA	NA	NA	NA	NA
P01111	118	NRAS	RASN_HUMAN GTPase NRas OS=Homo sapiens OX=9606 GN=NRAS PE=1 SV=1	VKDSDDVPMVLVGNKC(BTD[C])DLPTR|	NA	NA	NA	NA	0.52	NA	NA	NA	NA	NA	NA	NA	NA	NA	NA	NA	0.96	NA	NA	NA	NA	NA	NA	NA	NA	NA	NA	NA	NA	NA	NA	1.79	0.88	1.1	1.22	NA	NA	NA	NA	0.55	NA	NA	NA	NA	NA
P01130	296	LDLR	LDLR_HUMAN Low-density lipoprotein receptor OS=Homo sapiens OX=9606 GN=LDLR PE=1 SV=1	|VC(BTD[C])NMAR	NA	NA	NA	NA	NA	NA	NA	NA	NA	NA	NA	NA	NA	NA	NA	NA	0.64	NA	NA	NA	0.79	NA	NA	0.74	NA	0.78	0.82	NA	NA	NA	NA	NA	NA	NA	NA	NA	NA	NA	NA	NA	NA	NA	NA	NA	NA
P01130	452	LDLR	LDLR_HUMAN Low-density lipoprotein receptor OS=Homo sapiens OX=9606 GN=LDLR PE=1 SV=1	MIC(BTD[C])STQLDR|	NA	NA	NA	NA	NA	NA	NA	NA	NA	NA	NA	NA	NA	NA	NA	NA	NA	NA	NA	NA	NA	NA	NA	NA	0.81	0.95	NA	NA	NA	NA	NA	NA	NA	NA	NA	NA	NA	0.36	NA	NA	NA	NA	NA	NA	NA
P01130	75	LDLR	LDLR_HUMAN Low-density lipoprotein receptor OS=Homo sapiens OX=9606 GN=LDLR PE=1 SV=1	SGDFSC(BTD[C])GGR|	NA	NA	NA	NA	NA	NA	NA	NA	NA	NA	NA	NA	NA	NA	NA	NA	NA	NA	NA	NA	NA	NA	NA	NA	0.57	NA	NA	NA	NA	NA	NA	NA	NA	NA	NA	NA	NA	NA	NA	NA	NA	NA	NA	NA	NA
P01130	839	LDLR	LDLR_HUMAN Low-density lipoprotein receptor OS=Homo sapiens OX=9606 GN=LDLR PE=1 SV=1	TTEDEVHIC(BTD[C])HNQDGYSYPSR|TTEDEVHIC(BTD[C])HNQDGYSYPSR	NA	NA	NA	NA	NA	NA	NA	NA	NA	NA	NA	NA	NA	NA	NA	NA	NA	NA	NA	NA	NA	NA	NA	NA	NA	NA	NA	NA	NA	NA	NA	NA	NA	NA	NA	NA	NA	1.23	NA	0.87	0.72	1.02	0.97	0.98	0.6
P01584	124	IL1B	IL1B_HUMAN Interleukin-1 beta OS=Homo sapiens OX=9606 GN=IL1B PE=1 SV=2	SLNC(BTD[C])TLR|	NA	NA	NA	NA	NA	NA	NA	NA	NA	NA	NA	NA	NA	NA	NA	NA	NA	NA	NA	NA	NA	NA	NA	NA	NA	NA	NA	NA	NA	NA	NA	NA	NA	NA	NA	NA	NA	NA	NA	NA	NA	NA	NA	NA	NA
P02462	1493	COL4A1	CO4A1_HUMAN Collagen alpha-1(IV) chain OS=Homo sapiens OX=9606 GN=COL4A1 PE=1 SV=4	AHGQDLGTAGSC(BTD[C])LR|	NA	NA	NA	NA	NA	NA	NA	NA	NA	NA	NA	NA	NA	NA	NA	NA	NA	NA	NA	NA	NA	NA	NA	0.74	NA	NA	NA	NA	NA	NA	NA	NA	NA	NA	NA	NA	NA	NA	NA	NA	NA	NA	NA	NA	NA
P02462	1460	COL4A1	CO4A1_HUMAN Collagen alpha-1(IV) chain OS=Homo sapiens OX=9606 GN=COL4A1 PE=1 SV=4	HSQTIDDPQC(BTD[C])PSGTK|	NA	NA	NA	NA	NA	NA	NA	NA	NA	NA	NA	NA	NA	NA	NA	NA	NA	NA	NA	NA	NA	NA	NA	0.73	NA	NA	NA	NA	NA	NA	NA	NA	NA	NA	NA	NA	NA	NA	NA	NA	NA	NA	NA	NA	NA
P02545	522	LMNA	LMNA_HUMAN Prelamin-A/C OS=Homo sapiens OX=9606 GN=LMNA PE=1 SV=1	AQNTWGC(BTD[C])GNSLR|	0.54	2.02	0.91	0.65	0.38	1.37	1.02	0.54	1.28	0.39	0.71	0.81	1.01	NA	NA	1.01	NA	1	0.68	0.63	0.87	NA	0.6	0.96	NA	0.82	1.69	NA	2.09	0.3	0.27	NA	1.82	NA	NA	0.22	0.34	NA	NA	NA	NA	NA	NA	NA	NA
P02545	591	LMNA	LMNA_HUMAN Prelamin-A/C OS=Homo sapiens OX=9606 GN=LMNA PE=1 SV=1	TVLCGTC(BTD[C])GQPADK|	NA	2.5	0.82	NA	NA	NA	NA	NA	1.1	NA	NA	1.13	0.75	NA	NA	1.15	1.05	0.77	0.74	0.44	0.85	1.46	NA	0.79	0.54	0.72	NA	1.45	NA	NA	NA	NA	1.13	NA	NA	NA	NA	0.59	NA	NA	0.75	0.59	NA	0.88	NA
P02545	588	LMNA	LMNA_HUMAN Prelamin-A/C OS=Homo sapiens OX=9606 GN=LMNA PE=1 SV=1	TVLC(BTD[C])GTCGQPADK|	NA	NA	NA	0.69	NA	NA	NA	NA	NA	NA	NA	1.08	NA	NA	NA	NA	NA	0.91	0.93	NA	NA	NA	NA	NA	0.69	NA	NA	NA	NA	NA	NA	NA	NA	NA	NA	NA	NA	0.63	NA	NA	NA	0.76	NA	NA	NA
P02751	141	FN1	FINC_HUMAN Fibronectin OS=Homo sapiens OX=9606 GN=FN1 PE=1 SV=4	C(BTD[C])HEGGQSYK|C(BTD[C])HEGGQSYK	0.59	NA	NA	NA	0.56	NA	1.08	0.79	NA	NA	NA	NA	NA	NA	NA	NA	NA	NA	NA	NA	NA	NA	0.96	NA	NA	NA	NA	NA	NA	NA	NA	NA	NA	NA	NA	NA	NA	NA	NA	NA	NA	NA	NA	NA	NA
P02751	52	FN1	FINC_HUMAN Fibronectin OS=Homo sapiens OX=9606 GN=FN1 PE=1 SV=4	PGC(BTD[C])YDNGK|PGC(BTD[C])YDNGK	NA	1.33	NA	NA	NA	NA	NA	NA	NA	NA	NA	NA	NA	NA	NA	1.41	NA	NA	NA	NA	1.33	NA	NA	1.03	1.82	1.08	NA	NA	NA	NA	NA	NA	NA	NA	NA	NA	NA	NA	NA	NA	NA	NA	NA	NA	NA
P02751	135	FN1	FINC_HUMAN Fibronectin OS=Homo sapiens OX=9606 GN=FN1 PE=1 SV=4	|ISC(BTD[C])TIANR	NA	NA	NA	NA	NA	NA	NA	NA	NA	NA	NA	NA	NA	NA	NA	0.81	NA	NA	NA	NA	0.96	1	NA	NA	0.94	NA	NA	NA	NA	NA	NA	NA	NA	NA	NA	NA	NA	NA	NA	NA	NA	NA	NA	NA	NA
P02751	258	FN1	FINC_HUMAN Fibronectin OS=Homo sapiens OX=9606 GN=FN1 PE=1 SV=4	GNLLQC(BTD[C])ICTGNGR|	NA	NA	NA	NA	NA	NA	NA	NA	NA	NA	NA	1.09	NA	NA	NA	NA	NA	NA	NA	NA	NA	NA	NA	NA	NA	NA	NA	NA	NA	NA	NA	NA	NA	NA	NA	NA	NA	NA	NA	NA	NA	NA	NA	NA	NA
P02766	30	TTR	TTHY_HUMAN Transthyretin OS=Homo sapiens OX=9606 GN=TTR PE=1 SV=1	|C(BTD[C])PLMVK	1.3	NA	NA	NA	0.61	NA	1	NA	NA	NA	NA	NA	NA	NA	NA	NA	NA	NA	NA	NA	0.89	NA	NA	NA	NA	NA	NA	NA	NA	NA	NA	NA	NA	NA	NA	NA	NA	0.47	NA	NA	NA	NA	NA	NA	NA
P02786	363	TFRC	TFR1_HUMAN Transferrin receptor protein 1 OS=Homo sapiens OX=9606 GN=TFRC PE=1 SV=2	TDSTC(BTD[C])R|TDSTC(BTD[C])R	0.53	3.12	0.87	0.72	0.61	1.8	0.65	0.64	0.82	0.72	0.85	1.22	2.6	0.54	1.02	0.98	1.19	1.3	1.45	0.66	1.39	2.35	0.82	0.87	1.02	1.32	2.14	1.08	2.66	NA	NA	1.12	0.77	0.68	1.05	NA	NA	0.75	0.6	0.96	0.8	1.06	0.93	1.15	0.98
P02786	353	TFRC	TFR1_HUMAN Transferrin receptor protein 1 OS=Homo sapiens OX=9606 GN=TFRC PE=1 SV=2	LFGNMEGDC(BTD[C])PSDWK|	NA	NA	NA	NA	NA	NA	NA	NA	NA	NA	NA	NA	NA	NA	NA	NA	NA	NA	NA	NA	0.98	NA	NA	NA	NA	NA	NA	NA	NA	NA	NA	NA	NA	NA	NA	NA	NA	NA	NA	NA	NA	NA	NA	NA	NA
P02787	469	TF	TRFE_HUMAN Serotransferrin OS=Homo sapiens OX=9606 GN=TF PE=1 SV=3	SC(BTD[C])HTAVGR|	NA	NA	NA	NA	NA	NA	NA	NA	NA	NA	NA	NA	1.29	NA	NA	NA	NA	0.96	NA	NA	NA	NA	NA	NA	NA	NA	NA	NA	NA	NA	NA	NA	NA	NA	NA	NA	NA	NA	NA	NA	NA	NA	NA	NA	NA
P02792	127	FTL	FRIL_HUMAN Ferritin light chain OS=Homo sapiens OX=9606 GN=FTL PE=1 SV=2	TDPHLC(BTD[C])DFLETHFLDEEVK|TDPHLC(BTD[C])DFLETHFLDEEVK	NA	NA	NA	NA	NA	NA	NA	NA	NA	NA	NA	NA	NA	NA	NA	NA	NA	NA	NA	NA	NA	NA	NA	NA	NA	NA	NA	0.11	NA	NA	NA	NA	NA	NA	NA	NA	NA	NA	NA	NA	0.67	NA	NA	NA	0.42
P02794	131	FTH1	FRIH_HUMAN Ferritin heavy chain OS=Homo sapiens OX=9606 GN=FTH1 PE=1 SV=2	LATDKNDPHLC(BTD[C])DFIETHYLNEQVK NDPHLC(BTD[C])DFIETHYLNEQVK|NDPHLC(BTD[C])DFIETHYLNEQVK	NA	NA	NA	NA	NA	NA	NA	NA	NA	NA	NA	NA	NA	NA	NA	NA	NA	NA	NA	NA	NA	NA	NA	NA	NA	NA	NA	NA	NA	NA	NA	NA	NA	NA	NA	NA	NA	NA	NA	0.33	0.38	NA	0.27	0.47	0.49
P02795	48	MT2A	MT2_HUMAN Metallothionein-2 OS=Homo sapiens OX=9606 GN=MT2A PE=1 SV=1	CAQGC(BTD[C])ICK|	NA	NA	NA	0.63	NA	NA	NA	NA	NA	NA	NA	1.35	NA	NA	NA	NA	NA	NA	NA	NA	1.16	NA	NA	NA	NA	NA	NA	NA	NA	NA	NA	NA	NA	NA	NA	NA	NA	NA	NA	NA	NA	NA	NA	NA	NA
P02795	50	MT2A	MT2_HUMAN Metallothionein-2 OS=Homo sapiens OX=9606 GN=MT2A PE=1 SV=1	CAQGCIC(BTD[C])K|	NA	NA	NA	0.63	NA	NA	NA	NA	NA	NA	NA	NA	NA	NA	NA	NA	0.84	NA	NA	NA	1.45	NA	NA	0.71	NA	0.8	NA	NA	NA	NA	NA	NA	NA	NA	NA	NA	NA	NA	NA	NA	NA	NA	NA	NA	NA
P02795	26	MT2A	MT2_HUMAN Metallothionein-2 OS=Homo sapiens OX=9606 GN=MT2A PE=1 SV=1	|ECKC(BTD[C])TSCK	NA	NA	NA	NA	NA	NA	NA	NA	NA	NA	NA	0.54	NA	NA	NA	NA	NA	NA	NA	NA	0.58	NA	NA	NA	NA	NA	NA	NA	NA	NA	NA	NA	NA	NA	NA	NA	NA	NA	NA	NA	NA	NA	NA	NA	NA
P04040	232	CAT	CATA_HUMAN Catalase OS=Homo sapiens OX=9606 GN=CAT PE=1 SV=3	LVNANGEAVYC(BTD[C])K|LVNANGEAVYC(BTD[C])K	1.01	NA	1.19	0.49	0.85	NA	1.04	1.52	NA	0.94	1	2.03	1.05	1.9	1.93	1.39	0.77	1.31	0.85	0.49	1.02	NA	1.34	0.97	1.18	1.12	NA	NA	1.21	0.09	0.12	3.59	0.92	2.29	3.21	NA	NA	0.31	3.32	0.29	NA	0.29	0.36	0.47	0.49
P04040	460	CAT	CATA_HUMAN Catalase OS=Homo sapiens OX=9606 GN=CAT PE=1 SV=3	RLC(BTD[C])ENIAGHLK LC(BTD[C])ENIAGHLK|LC(BTD[C])ENIAGHLK	0.67	1.01	0.97	0.48	0.64	1.26	0.88	0.8	1.35	0.42	0.78	1.01	0.74	1.06	1.32	0.82	0.75	NA	0.6	0.47	0.95	1.47	0.85	1.01	1.05	0.99	1.24	0.21	1.56	NA	NA	3	NA	1.47	1.52	0.65	0.95	0.36	1.23	0.33	0.36	0.42	0.38	0.54	0.44
P04040	377	CAT	CATA_HUMAN Catalase OS=Homo sapiens OX=9606 GN=CAT PE=1 SV=3	|LGPNYLHIPVNC(BTD[C])PYR	NA	NA	NA	NA	NA	NA	NA	NA	NA	NA	NA	NA	NA	NA	NA	NA	NA	NA	NA	NA	NA	NA	NA	NA	NA	NA	NA	NA	NA	NA	NA	NA	NA	NA	0.99	NA	NA	NA	NA	NA	NA	NA	NA	NA	NA
P04049	637	RAF1	RAF1_HUMAN RAF proto-oncogene serine/threonine-protein kinase OS=Homo sapiens OX=9606 GN=RAF1 PE=1 SV=1	AAHTEDINAC(BTD[C])TLTTSPR|	NA	2.09	NA	NA	NA	0.95	NA	NA	NA	NA	NA	NA	NA	NA	0.9	NA	NA	NA	NA	NA	NA	NA	NA	NA	NA	NA	NA	NA	NA	NA	NA	NA	NA	NA	NA	NA	1.07	NA	NA	NA	NA	NA	NA	NA	NA
P04062	165	GBA	GLCM_HUMAN Lysosomal acid glucosylceramidase OS=Homo sapiens OX=9606 GN=GBA PE=1 SV=3	VPMASC(BTD[C])DFSIR|	NA	NA	NA	NA	NA	NA	NA	NA	NA	NA	NA	NA	0.62	NA	NA	NA	NA	NA	NA	NA	0.9	NA	NA	NA	NA	NA	NA	NA	NA	NA	NA	NA	NA	NA	NA	NA	NA	0.43	NA	NA	0.46	NA	NA	0.99	NA
P04083	270	ANXA1	ANXA1_HUMAN Annexin A1 OS=Homo sapiens OX=9606 GN=ANXA1 PE=1 SV=2	C(BTD[C])ATSKPAFFAEK|C(BTD[C])ATSKPAFFAEK	0.88	2.75	0.81	NA	0.62	NA	1.44	1.02	NA	0.8	1.71	0.79	NA	NA	NA	0.63	0.77	1.07	NA	NA	NA	NA	0.89	0.7	0.85	0.92	NA	0.98	NA	0.94	0.42	4.72	1.61	NA	NA	0.31	NA	0.34	NA	NA	0.32	0.43	0.41	0.46	0.37
P04083	263	ANXA1	ANXA1_HUMAN Annexin A1 OS=Homo sapiens OX=9606 GN=ANXA1 PE=1 SV=2	GDIEKC(BTD[C])LTAIVK|	NA	NA	1.7	0.36	0.67	NA	NA	NA	NA	NA	0.75	0.95	0.64	1.48	1.91	0.8	0.44	NA	0.56	0.34	0.64	NA	NA	0.62	0.63	0.73	NA	0.52	NA	NA	NA	1.03	NA	NA	NA	0.27	0.7	0.42	NA	0.25	0.22	0.34	0.26	0.42	0.28
P04083	324	ANXA1	ANXA1_HUMAN Annexin A1 OS=Homo sapiens OX=9606 GN=ANXA1 PE=1 SV=2	MYGISLC(BTD[C])QAILDETK|	NA	NA	NA	NA	NA	NA	NA	NA	NA	NA	NA	NA	NA	NA	NA	NA	NA	NA	NA	NA	NA	NA	NA	NA	NA	NA	NA	NA	NA	NA	NA	NA	NA	NA	NA	NA	NA	NA	NA	0.61	NA	0.52	NA	0.65	0.51
P04150	463	NR3C1	GCR_HUMAN Glucocorticoid receptor OS=Homo sapiens OX=9606 GN=NR3C1 PE=1 SV=1	|NDC(BTD[C])IIDK	NA	NA	NA	NA	NA	NA	NA	NA	NA	NA	NA	NA	NA	NA	NA	NA	NA	NA	NA	NA	NA	NA	NA	NA	NA	NA	NA	NA	NA	NA	NA	NA	NA	NA	NA	NA	NA	NA	NA	NA	NA	NA	NA	NA	NA
P04156	214	PRNP	PRIO_HUMAN Major prion protein OS=Homo sapiens OX=9606 GN=PRNP PE=1 SV=1	VVEQMC(BTD[C])ITQYER|	NA	NA	NA	NA	NA	NA	NA	NA	NA	NA	NA	NA	NA	NA	NA	0.98	NA	NA	NA	NA	NA	NA	NA	0.84	NA	1.72	NA	NA	NA	NA	NA	NA	NA	NA	NA	NA	NA	NA	NA	NA	NA	NA	NA	NA	NA
P04181	150	OAT	OAT_HUMAN Ornithine aminotransferase, mitochondrial OS=Homo sapiens OX=9606 GN=OAT PE=1 SV=1	VLPMNTGVEAGETAC(BTD[C])K|	0.45	NA	0.85	NA	NA	1.07	0.69	0.74	NA	0.74	NA	0.92	1.01	NA	NA	NA	0.74	NA	NA	NA	0.91	NA	0.62	0.74	0.88	0.98	1.21	0.72	NA	NA	NA	1.42	1.01	NA	NA	NA	NA	1.2	NA	0.83	1.07	NA	NA	1.03	0.77
P04181	330	OAT	OAT_HUMAN Ornithine aminotransferase, mitochondrial OS=Homo sapiens OX=9606 GN=OAT PE=1 SV=1	PGEHGSTYGGNPLGC(BTD[C])R|	NA	2.01	0.94	NA	NA	1.02	NA	NA	0.97	NA	1.28	0.98	NA	0.72	0.88	0.85	0.68	1.15	NA	NA	0.88	1.97	NA	1.04	0.99	NA	NA	NA	NA	NA	NA	1.26	0.97	0.69	0.99	NA	0.59	NA	0.76	0.72	NA	0.96	NA	0.81	0.82
P04183	79	TK1	KITH_HUMAN Thymidine kinase, cytosolic OS=Homo sapiens OX=9606 GN=TK1 PE=1 SV=2	NTMEALPAC(BTD[C])LLR|	NA	NA	NA	NA	NA	NA	NA	0.73	NA	0.83	NA	1.36	NA	NA	NA	NA	0.95	NA	NA	NA	1.08	NA	NA	NA	NA	1.39	NA	NA	NA	NA	NA	NA	NA	NA	NA	NA	NA	NA	NA	NA	NA	NA	NA	NA	NA
P04183	66	TK1	KITH_HUMAN Thymidine kinase, cytosolic OS=Homo sapiens OX=9606 GN=TK1 PE=1 SV=2	YSSSFC(BTD[C])THDR|YSSSFC(BTD[C])THDR	0.75	2.49	1.1	NA	0.76	1.28	0.96	0.73	NA	NA	NA	NA	NA	NA	NA	0.99	NA	1.11	NA	NA	1.01	NA	NA	NA	1.01	1.38	2.78	NA	NA	NA	NA	NA	NA	NA	NA	NA	NA	NA	NA	NA	NA	NA	NA	NA	NA
P04183	206	TK1	KITH_HUMAN Thymidine kinase, cytosolic OS=Homo sapiens OX=9606 GN=TK1 PE=1 SV=2	ASGQPAGPDNKENC(BTD[C])PVPGKPGEAVAAR|ENC(BTD[C])PVPGKPGEAVAAR	0.32	NA	0.83	0.58	0.44	NA	0.51	NA	1.02	NA	NA	NA	0.85	0.82	1.09	0.84	0.6	0.86	0.78	0.62	0.89	NA	NA	0.68	0.72	0.95	NA	NA	NA	NA	NA	NA	NA	0.82	1.01	0.83	0.77	NA	0.78	0.52	0.57	NA	NA	0.59	NA
P04183	185	TK1	KITH_HUMAN Thymidine kinase, cytosolic OS=Homo sapiens OX=9606 GN=TK1 PE=1 SV=2	|YHSVC(BTD[C])R	NA	1.61	1.01	NA	NA	1.21	NA	0.93	1.33	NA	NA	1.26	NA	NA	NA	0.95	0.85	1.01	NA	NA	1.08	1.51	NA	NA	0.96	1.4	2.71	NA	NA	NA	NA	NA	NA	NA	NA	NA	NA	NA	NA	NA	NA	NA	NA	NA	NA
P04406	156	GAPDH	G3P_HUMAN Glyceraldehyde-3-phosphate dehydrogenase OS=Homo sapiens OX=9606 GN=GAPDH PE=1 SV=3	IISNASCTTNC(BTD[C])LAPLAK|IISNASCTTNC(BTD[C])LAPLAK	0.67	2.77	0.75	0.46	0.95	0.91	1.12	0.93	0.92	0.79	0.74	0.84	0.69	1.81	2.16	0.75	0.48	0.77	0.53	0.42	0.66	2.07	1.1	0.6	0.63	0.62	1.34	NA	2.29	0.83	3.56	NA	1.23	1.59	NA	0.26	1	1.45	1.18	0.46	0.47	0.51	3.23	0.94	0.45
P04406	247	GAPDH	G3P_HUMAN Glyceraldehyde-3-phosphate dehydrogenase OS=Homo sapiens OX=9606 GN=GAPDH PE=1 SV=3	VPTANVSVVDLTC(BTD[C])R|VPTANVSVVDLTC(BTD[C])R	NA	2.19	0.96	0.42	0.8	1.31	1.28	1.07	1.23	0.68	0.66	1.29	0.85	1.39	2.12	1.11	0.61	1.16	0.56	0.41	1.09	1.75	1.15	0.9	0.94	1.09	2.73	1.56	1.15	0.42	0.71	2.07	1.36	1.45	NA	0.23	0.85	0.62	1.19	0.4	0.33	0.4	1.01	0.67	0.38
P04406	152	GAPDH	G3P_HUMAN Glyceraldehyde-3-phosphate dehydrogenase OS=Homo sapiens OX=9606 GN=GAPDH PE=1 SV=3	IISNASC(BTD[C])TTNCLAPLAK|IISNASC(BTD[C])TTNCLAPLAK	0.59	3.78	0.76	0.65	0.68	0.85	0.81	0.7	0.83	NA	1	0.53	1.35	1.51	2.28	0.87	1.04	0.61	1.13	0.53	0.51	3.05	0.73	0.6	0.53	0.41	0.56	5.88	2.22	0.76	NA	18.74	1.64	0.79	1.2	0.65	1.67	3.16	1.57	1.3	1.03	0.89	NA	1.03	0.86
P04632	144	CAPNS1	CPNS1_HUMAN Calpain small subunit 1 OS=Homo sapiens OX=9606 GN=CAPNS1 PE=1 SV=1	TDGFGIDTC(BTD[C])R|	0.79	2.74	NA	0.58	0.69	NA	1.03	0.85	NA	NA	NA	1.69	NA	NA	NA	1.28	0.68	NA	0.79	NA	NA	NA	1.07	NA	1.07	1.36	3.63	NA	1.81	NA	NA	2.51	NA	NA	NA	NA	0.88	NA	1.42	0.34	0.24	0.27	0.43	0.61	0.37
P04637	135	TP53	P53_HUMAN Cellular tumor antigen p53 OS=Homo sapiens OX=9606 GN=TP53 PE=1 SV=4	MFC(BTD[C])QLAK|	NA	NA	NA	NA	NA	1.44	NA	NA	NA	NA	NA	NA	NA	NA	NA	NA	0.56	NA	NA	NA	NA	NA	NA	NA	NA	0.48	NA	NA	NA	NA	NA	NA	NA	NA	NA	NA	NA	NA	NA	NA	NA	NA	NA	NA	NA
P04637	124	TP53	P53_HUMAN Cellular tumor antigen p53 OS=Homo sapiens OX=9606 GN=TP53 PE=1 SV=4	SVTC(BTD[C])TYSPALNK|	NA	1.01	0.71	0.43	NA	NA	NA	NA	NA	NA	NA	0.83	0.98	NA	NA	NA	0.79	0.69	NA	0.46	0.98	NA	NA	NA	0.76	0.78	1.11	NA	NA	NA	NA	NA	NA	NA	NA	NA	NA	NA	NA	NA	NA	NA	NA	NA	NA
P04637	176	TP53	P53_HUMAN Cellular tumor antigen p53 OS=Homo sapiens OX=9606 GN=TP53 PE=1 SV=4	C(BTD[C])PHHER|C(BTD[C])PHHER	NA	NA	NA	NA	NA	NA	NA	NA	NA	NA	NA	NA	NA	NA	NA	NA	NA	NA	NA	NA	NA	NA	NA	NA	NA	NA	NA	NA	NA	NA	NA	NA	NA	NA	NA	NA	NA	NA	NA	NA	0.77	NA	NA	NA	NA
P04818	180	TYMS	TYSY_HUMAN Thymidylate synthase OS=Homo sapiens OX=9606 GN=TYMS PE=1 SV=3	IIMC(BTD[C])AWNPR|	NA	NA	0.94	NA	NA	NA	NA	0.58	NA	NA	NA	NA	NA	NA	NA	NA	1.69	NA	NA	NA	1.02	NA	NA	1.02	0.58	NA	NA	NA	NA	NA	NA	NA	NA	NA	NA	NA	NA	NA	NA	NA	NA	NA	NA	NA	NA
P04843	545	RPN1	RPN1_HUMAN Dolichyl-diphosphooligosaccharide--protein glycosyltransferase subunit 1 OS=Homo sapiens OX=9606 GN=RPN1 PE=1 SV=1	LKTEGSDLC(BTD[C])DR|	0.52	2.96	0.93	0.58	0.44	1.66	0.78	0.54	1.1	0.65	0.83	1.07	0.65	1.05	1.97	0.99	0.69	1.12	0.57	0.38	1.04	2.95	0.64	0.86	0.88	0.99	3.08	3.36	NA	0.89	0.71	1.81	1.07	0.87	1.56	0.73	0.62	0.44	0.89	0.54	NA	0.62	0.84	0.63	0.68
P04844	72	RPN2	RPN2_HUMAN Dolichyl-diphosphooligosaccharide--protein glycosyltransferase subunit 2 OS=Homo sapiens OX=9606 GN=RPN2 PE=1 SV=3	|KAC(BTD[C])TYIR	NA	1.95	0.76	0.89	NA	1.06	0.64	0.58	1.1	0.41	0.89	0.98	0.7	0.98	1.26	0.84	1.07	0.95	0.64	0.52	0.85	1.81	0.53	0.87	0.73	0.96	1.79	2.99	2.49	NA	0.89	NA	1.06	0.86	1.6	NA	0.45	0.88	1.15	0.67	NA	0.84	NA	0.83	0.57
P04899	287	GNAI2	GNAI2_HUMAN Guanine nucleotide-binding protein G(i) subunit alpha-2 OS=Homo sapiens OX=9606 GN=GNAI2 PE=1 SV=3	|ITHSPLTIC(BTD[C])FPEYTGANK	NA	NA	1.01	NA	NA	NA	0.96	NA	NA	NA	NA	1.25	0.89	1.01	1.2	1.05	0.95	NA	0.96	0.47	1.44	1.28	NA	1.11	1.17	0.95	NA	1.85	NA	0.84	NA	1.29	NA	0.79	1.01	0.39	0.91	NA	0.68	NA	0.48	0.57	0.71	0.73	0.54
P04899	326	GNAI2	GNAI2_HUMAN Guanine nucleotide-binding protein G(i) subunit alpha-2 OS=Homo sapiens OX=9606 GN=GNAI2 PE=1 SV=3	|EIYTHFTC(BTD[C])ATDTK	NA	NA	NA	NA	0.81	1.8	1	NA	1.32	NA	1.31	NA	NA	NA	0.91	NA	1.03	NA	NA	0.47	NA	NA	NA	NA	NA	NA	NA	NA	1.57	0.34	NA	NA	NA	NA	NA	0.21	1.05	NA	NA	NA	NA	NA	NA	NA	NA
P04899	66	GNAI2	GNAI2_HUMAN Guanine nucleotide-binding protein G(i) subunit alpha-2 OS=Homo sapiens OX=9606 GN=GNAI2 PE=1 SV=3	IIHEDGYSEEEC(BTD[C])R|	NA	1.76	NA	NA	0.99	NA	NA	1.13	NA	NA	NA	2.09	NA	NA	NA	1.58	1.2	NA	NA	NA	1.61	2.43	1.05	1.4	1.28	2.48	NA	NA	NA	NA	NA	NA	NA	NA	NA	NA	0.96	NA	NA	NA	0.93	NA	NA	0.96	NA
P04899	352	GNAI2	GNAI2_HUMAN Guanine nucleotide-binding protein G(i) subunit alpha-2 OS=Homo sapiens OX=9606 GN=GNAI2 PE=1 SV=3	|NNLKDC(BTD[C])GLF	NA	NA	NA	NA	NA	NA	0.75	0.79	NA	NA	NA	1.02	NA	NA	NA	NA	NA	NA	NA	NA	NA	NA	NA	NA	NA	NA	NA	NA	NA	NA	NA	NA	NA	NA	NA	NA	NA	NA	NA	NA	NA	NA	NA	NA	NA
P04899	255	GNAI2	GNAI2_HUMAN Guanine nucleotide-binding protein G(i) subunit alpha-2 OS=Homo sapiens OX=9606 GN=GNAI2 PE=1 SV=3	LFDSIC(BTD[C])NNK|	NA	NA	NA	NA	NA	NA	NA	NA	NA	NA	0.89	NA	NA	NA	1.09	NA	0.54	NA	NA	0.49	NA	NA	NA	NA	NA	NA	NA	NA	NA	NA	NA	1.05	NA	NA	NA	NA	NA	NA	NA	0.74	NA	NA	1	NA	NA
P04899	140	GNAI2	GNAI2_HUMAN Guanine nucleotide-binding protein G(i) subunit alpha-2 OS=Homo sapiens OX=9606 GN=GNAI2 PE=1 SV=3	LWADHGVQAC(BTD[C])FGR|	NA	NA	NA	NA	NA	NA	NA	NA	NA	NA	NA	NA	NA	NA	NA	NA	0.95	NA	NA	NA	1.25	NA	NA	1.13	0.96	NA	NA	NA	NA	NA	NA	NA	NA	NA	NA	NA	0.98	NA	NA	NA	NA	NA	NA	NA	NA
P05023	249	ATP1A1	AT1A1_HUMAN Sodium/potassium-transporting ATPase subunit alpha-1 OS=Homo sapiens OX=9606 GN=ATP1A1 PE=1 SV=1	NIAFFSTNC(BTD[C])VEGTAR|	NA	NA	NA	1.21	NA	NA	1	NA	NA	0.86	NA	NA	NA	1.07	0.89	1.65	1.03	NA	1.11	NA	1.78	2.96	0.97	1.08	1.2	1.24	NA	NA	NA	NA	NA	2.07	1.62	0.96	NA	NA	NA	1	1.12	1.08	0.84	NA	2.56	0.92	1.09
P05023	518	ATP1A1	AT1A1_HUMAN Sodium/potassium-transporting ATPase subunit alpha-1 OS=Homo sapiens OX=9606 GN=ATP1A1 PE=1 SV=1	C(BTD[C])SSILLHGK|C(BTD[C])SSILLHGK	1.1	1.38	1.16	0.46	0.85	1.27	NA	NA	1.14	0.83	0.75	1.25	NA	0.89	1.38	1.01	0.93	1.46	NA	0.41	1.16	2.19	NA	1.13	1.22	1.15	NA	1.4	0.39	0.15	0.19	NA	1.28	0.92	1.07	0.11	NA	0.62	1.08	NA	0.49	0.36	0.88	0.57	0.83
P05023	211	ATP1A1	AT1A1_HUMAN Sodium/potassium-transporting ATPase subunit alpha-1 OS=Homo sapiens OX=9606 GN=ATP1A1 PE=1 SV=1	IISANGC(BTD[C])K|IISANGC(BTD[C])K	0.41	1.72	0.89	0.49	0.34	1.35	0.5	0.4	1.18	0.74	NA	0.84	0.81	0.94	NA	0.96	0.64	1.11	0.75	0.51	0.89	3.11	NA	0.9	0.75	0.95	1.06	NA	3.38	0.07	NA	1.72	1.28	NA	NA	0.03	NA	0.52	0.87	NA	0.76	0.45	2.45	0.85	1.11
P05023	428	ATP1A1	AT1A1_HUMAN Sodium/potassium-transporting ATPase subunit alpha-1 OS=Homo sapiens OX=9606 GN=ATP1A1 PE=1 SV=1	IAGLC(BTD[C])NR|	NA	2.25	0.7	0.48	0.72	1.24	0.64	0.46	0.81	0.64	0.82	0.88	0.98	NA	1.45	0.83	0.5	0.75	0.91	0.45	0.75	2.08	0.63	0.93	0.63	0.81	1.66	NA	1.87	1.05	0.51	1.36	1.58	0.65	NA	0.19	NA	NA	2.11	NA	NA	NA	NA	NA	NA
P05023	374	ATP1A1	AT1A1_HUMAN Sodium/potassium-transporting ATPase subunit alpha-1 OS=Homo sapiens OX=9606 GN=ATP1A1 PE=1 SV=1	NLEAVETLGSTSTIC(BTD[C])SDK|	NA	NA	NA	NA	0.56	NA	0.92	NA	NA	0.62	NA	1.17	NA	NA	NA	NA	1.05	NA	NA	0.59	1.01	NA	0.89	NA	NA	NA	NA	1.33	NA	NA	NA	NA	NA	NA	NA	NA	NA	1.04	NA	NA	NA	0.88	NA	1.18	0.61
P05023	663	ATP1A1	AT1A1_HUMAN Sodium/potassium-transporting ATPase subunit alpha-1 OS=Homo sapiens OX=9606 GN=ATP1A1 PE=1 SV=1	AC(BTD[C])VVHGSDLK|AC(BTD[C])VVHGSDLK	0.6	2.26	1.15	0.61	0.49	1.5	0.79	0.73	1.33	0.56	1.42	1.23	0.96	NA	0.68	0.89	0.96	0.96	0.79	0.55	1.26	1.84	0.72	1.04	1	1.21	2.33	NA	1.36	0.96	0.8	NA	1.47	0.83	1.06	0.62	0.84	0.54	0.89	0.62	NA	0.88	0.71	0.8	0.48
P05023	705	ATP1A1	AT1A1_HUMAN Sodium/potassium-transporting ATPase subunit alpha-1 OS=Homo sapiens OX=9606 GN=ATP1A1 PE=1 SV=1	LIIVEGC(BTD[C])QR|	0.44	2.07	0.85	NA	NA	1.32	NA	0.56	0.96	0.53	0.94	1.04	0.97	NA	0.99	1.08	0.64	NA	0.88	NA	1.04	1.68	0.51	0.79	NA	1.22	1.35	3.86	1.81	NA	NA	1.4	1.03	0.99	NA	NA	1	0.95	1.15	0.83	0.85	0.55	2.35	0.83	1.03
P05023	606	ATP1A1	AT1A1_HUMAN Sodium/potassium-transporting ATPase subunit alpha-1 OS=Homo sapiens OX=9606 GN=ATP1A1 PE=1 SV=1	AAVPDAVGKC(BTD[C])R|AAVPDAVGKC(BTD[C])R	0.43	3.58	0.52	0.99	0.31	1.56	0.53	0.42	1.26	NA	0.51	0.67	NA	NA	3.3	0.93	0.66	0.79	0.65	0.65	0.78	4.33	0.47	0.58	0.65	0.86	1.7	2.37	2.41	0.17	0.15	3.42	2.8	1.84	2.94	0.15	0.78	0.4	NA	0.59	0.71	0.3	NA	0.88	NA
P05026	213	ATP1B1	AT1B1_HUMAN Sodium/potassium-transporting ATPase subunit beta-1 OS=Homo sapiens OX=9606 GN=ATP1B1 PE=1 SV=1	|YNPNVLPVQC(BTD[C])TGK	NA	NA	0.78	0.67	0.49	0.93	NA	0.46	NA	0.84	NA	0.48	0.91	1.13	1.22	NA	0.56	0.93	0.76	1.62	0.64	NA	0.42	NA	NA	0.7	1.1	NA	2.8	NA	NA	1.77	1.38	0.95	0.95	NA	1.03	0.98	0.81	0.77	0.85	0.79	1.38	0.98	0.68
P05026	175	ATP1B1	AT1B1_HUMAN Sodium/potassium-transporting ATPase subunit beta-1 OS=Homo sapiens OX=9606 GN=ATP1B1 PE=1 SV=1	EGKPC(BTD[C])IIIK|	0.31	NA	NA	0.66	NA	0.97	NA	0.4	0.81	NA	NA	0.66	1.42	NA	1.43	0.72	NA	0.78	0.95	0.67	0.59	2.18	NA	0.72	0.65	0.6	1.29	1.4	NA	NA	NA	1.89	1.06	0.96	1.07	NA	0.85	0.42	0.88	0.39	0.54	NA	0.6	NA	0.45
P05067	62	APP	A4_HUMAN Amyloid-beta precursor protein OS=Homo sapiens OX=9606 GN=APP PE=1 SV=3	TC(BTD[C])IDTK|	NA	NA	NA	NA	NA	NA	NA	NA	NA	NA	NA	NA	NA	NA	NA	1.67	NA	0.96	NA	NA	NA	NA	NA	NA	1.02	NA	NA	NA	NA	NA	NA	NA	NA	NA	NA	NA	NA	NA	NA	NA	NA	NA	NA	NA	NA
P05091	386	ALDH2	ALDH2_HUMAN Aldehyde dehydrogenase, mitochondrial OS=Homo sapiens OX=9606 GN=ALDH2 PE=1 SV=2	|LLC(BTD[C])GGGIAADR	NA	2.45	0.8	NA	NA	1.19	NA	NA	1.06	NA	NA	1.1	NA	NA	NA	0.91	0.64	0.95	NA	NA	NA	1.68	NA	0.93	0.79	0.75	NA	0.47	1.22	NA	NA	NA	NA	NA	NA	NA	NA	NA	NA	NA	NA	NA	NA	0.87	0.71
P05091	66	ALDH2	ALDH2_HUMAN Aldehyde dehydrogenase, mitochondrial OS=Homo sapiens OX=9606 GN=ALDH2 PE=1 SV=2	|TFPTVNPSTGEVIC(BTD[C])QVAEGDK	NA	NA	NA	NA	NA	NA	NA	NA	NA	NA	NA	NA	NA	NA	NA	NA	NA	NA	NA	NA	NA	NA	NA	NA	NA	NA	NA	NA	NA	NA	NA	NA	NA	NA	1.35	NA	NA	NA	NA	NA	NA	NA	NA	NA	NA
P05120	145	SERPINB2	PAI2_HUMAN Plasminogen activator inhibitor 2 OS=Homo sapiens OX=9606 GN=SERPINB2 PE=1 SV=2	|EEYIRLC(BTD[C])QK	NA	NA	NA	NA	NA	NA	NA	NA	NA	NA	NA	NA	NA	NA	NA	NA	NA	NA	NA	NA	NA	NA	NA	NA	NA	NA	NA	NA	NA	NA	NA	NA	NA	NA	NA	0.02	NA	NA	NA	NA	NA	NA	NA	NA	NA
P05120	161	SERPINB2	PAI2_HUMAN Plasminogen activator inhibitor 2 OS=Homo sapiens OX=9606 GN=SERPINB2 PE=1 SV=2	|YYSSEPQAVDFLEC(BTD[C])AEEARK	NA	NA	NA	NA	NA	NA	NA	NA	NA	NA	NA	NA	NA	NA	NA	NA	NA	NA	NA	NA	NA	NA	NA	NA	NA	NA	NA	NA	NA	NA	NA	NA	NA	NA	NA	NA	NA	NA	NA	NA	NA	NA	NA	NA	NA
P05141	160	SLC25A5	ADT2_HUMAN ADP/ATP translocase 2 OS=Homo sapiens OX=9606 GN=SLC25A5 PE=1 SV=7	GLGDC(BTD[C])LVK|GLGDC(BTD[C])LVK	0.64	NA	NA	NA	NA	NA	NA	NA	NA	NA	NA	1.22	NA	0.99	1.43	1.05	0.78	NA	0.91	NA	0.95	NA	0.78	0.97	NA	NA	NA	NA	NA	0.48	NA	2.97	NA	0.99	1.16	0.26	1.44	NA	1.3	NA	NA	NA	1.63	NA	NA
P05141	257	SLC25A5	ADT2_HUMAN ADP/ATP translocase 2 OS=Homo sapiens OX=9606 GN=SLC25A5 PE=1 SV=7	GTDIMYTGTLDC(BTD[C])WRK|	NA	NA	NA	NA	NA	NA	NA	NA	NA	NA	NA	NA	NA	NA	1.16	NA	1.31	NA	NA	NA	NA	NA	NA	NA	1.3	NA	NA	NA	NA	NA	NA	NA	NA	NA	NA	NA	NA	NA	NA	NA	NA	NA	NA	NA	NA
P05165	290	PCCA	PCCA_HUMAN Propionyl-CoA carboxylase alpha chain, mitochondrial OS=Homo sapiens OX=9606 GN=PCCA PE=1 SV=4	EC(BTD[C])SIQR|	NA	NA	NA	NA	NA	NA	NA	NA	NA	NA	NA	NA	0.74	NA	NA	NA	NA	NA	0.77	NA	NA	NA	NA	NA	NA	NA	NA	NA	NA	NA	NA	NA	NA	NA	NA	NA	NA	NA	NA	NA	NA	NA	NA	NA	NA
P05165	76	PCCA	PCCA_HUMAN Propionyl-CoA carboxylase alpha chain, mitochondrial OS=Homo sapiens OX=9606 GN=PCCA PE=1 SV=4	GEIAC(BTD[C])R|	NA	NA	NA	NA	NA	NA	NA	NA	NA	NA	NA	NA	NA	NA	NA	NA	NA	NA	NA	NA	NA	NA	NA	NA	NA	NA	NA	0.24	NA	0.42	0.43	1.4	1.17	NA	NA	0.23	NA	0.49	1.28	NA	NA	NA	NA	NA	NA
P05165	616	PCCA	PCCA_HUMAN Propionyl-CoA carboxylase alpha chain, mitochondrial OS=Homo sapiens OX=9606 GN=PCCA PE=1 SV=4	|TVQC(BTD[C])LSR	NA	NA	NA	NA	NA	NA	NA	NA	NA	NA	NA	NA	NA	NA	NA	NA	NA	NA	NA	NA	NA	NA	NA	NA	NA	NA	NA	1.25	NA	NA	NA	NA	NA	NA	NA	NA	NA	NA	NA	NA	NA	NA	NA	NA	NA
P05166	365	PCCB	PCCB_HUMAN Propionyl-CoA carboxylase beta chain, mitochondrial OS=Homo sapiens OX=9606 GN=PCCB PE=1 SV=3	|VASGC(BTD[C])LDINSSVK	NA	NA	NA	0.52	0.39	NA	NA	NA	NA	NA	0.82	NA	0.64	0.78	1.38	NA	NA	NA	0.81	0.56	NA	NA	0.94	NA	NA	NA	NA	1	NA	NA	NA	1.69	1.56	1.01	1.31	NA	1	0.58	1.07	0.73	0.45	0.51	NA	0.9	0.89
P05166	269	PCCB	PCCB_HUMAN Propionyl-CoA carboxylase beta chain, mitochondrial OS=Homo sapiens OX=9606 GN=PCCB PE=1 SV=3	|AFENDVDALC(BTD[C])NLR	NA	NA	NA	NA	NA	NA	NA	NA	NA	NA	NA	NA	NA	NA	NA	NA	NA	NA	NA	NA	NA	NA	NA	NA	NA	NA	NA	1.83	NA	NA	NA	NA	NA	NA	NA	NA	NA	0.52	NA	1.08	0.53	0.77	0.54	0.83	0.74
P05198	98	EIF2S1	IF2A_HUMAN Eukaryotic translation initiation factor 2 subunit 1 OS=Homo sapiens OX=9606 GN=EIF2S1 PE=1 SV=3	VSPEEAIKC(BTD[C])EDK|	0.4	2.79	0.96	0.31	0.48	1.34	0.63	0.69	0.94	0.84	0.92	1.22	NA	0.94	1.1	1.27	0.62	1.31	0.58	0.37	1.08	2.39	0.57	0.94	0.82	1.16	2.14	NA	4.31	NA	1.44	1.55	0.95	1.08	1.29	1.45	0.71	0.48	0.81	NA	NA	0.55	0.54	1.06	0.52
P05198	70	EIF2S1	IF2A_HUMAN Eukaryotic translation initiation factor 2 subunit 1 OS=Homo sapiens OX=9606 GN=EIF2S1 PE=1 SV=3	NEC(BTD[C])VVVIR|NEC(BTD[C])VVVIR	0.63	NA	NA	0.37	0.63	1.47	0.84	0.88	1.02	0.67	0.86	NA	0.84	1.45	1.98	1.27	0.58	1.21	NA	0.44	0.96	1.24	0.9	0.84	0.92	NA	2.69	0.49	1.25	0.16	0.17	1.06	1.47	1.62	1.37	0.1	0.98	NA	1.28	NA	NA	0.55	NA	0.63	0.49
P05198	218	EIF2S1	IF2A_HUMAN Eukaryotic translation initiation factor 2 subunit 1 OS=Homo sapiens OX=9606 GN=EIF2S1 PE=1 SV=3	AGLNC(BTD[C])STENMPIK|AGLNC(BTD[C])STENMPIK	0.5	2.87	0.93	0.8	0.63	1.23	0.66	0.63	1.05	0.6	0.76	0.96	0.86	NA	1.43	0.96	0.67	1.01	0.62	0.43	0.92	1.82	0.71	0.93	0.75	1.01	1.87	NA	2.63	0.65	0.66	1.45	1.02	0.94	NA	0.47	0.79	0.3	0.85	0.56	0.38	0.37	NA	0.48	0.72
P05198	6	EIF2S1	IF2A_HUMAN Eukaryotic translation initiation factor 2 subunit 1 OS=Homo sapiens OX=9606 GN=EIF2S1 PE=1 SV=3	PGLSC(BTD[C])R|PGLSC(BTD[C])R	0.62	2.08	1	0.54	0.45	1.53	0.91	0.57	1.32	0.59	0.94	1.25	NA	1.07	1.26	0.99	0.7	1.24	NA	0.6	1.12	2.02	0.72	1.09	0.97	1.15	1.83	0.31	2.44	0.3	0.29	1.31	NA	1.95	1.74	NA	0.37	0.3	0.95	NA	NA	NA	NA	NA	NA
P05198	199	EIF2S1	IF2A_HUMAN Eukaryotic translation initiation factor 2 subunit 1 OS=Homo sapiens OX=9606 GN=EIF2S1 PE=1 SV=3	ADIEVAC(BTD[C])YGYEGIDAVK|	NA	NA	NA	NA	NA	NA	NA	NA	NA	NA	NA	NA	NA	NA	NA	NA	NA	NA	NA	NA	1.32	NA	NA	NA	NA	NA	NA	NA	NA	NA	NA	NA	NA	NA	NA	NA	NA	NA	NA	NA	0.81	NA	NA	NA	NA
P05362	332	ICAM1	ICAM1_HUMAN Intercellular adhesion molecule 1 OS=Homo sapiens OX=9606 GN=ICAM1 PE=1 SV=2	C(BTD[C])EAHPR|C(BTD[C])EAHPR	0.86	0.76	NA	NA	1.25	1	NA	1.05	NA	0.95	0.47	1.1	NA	NA	NA	1.01	1.11	0.91	NA	NA	NA	NA	1.43	0.98	NA	0.91	NA	NA	0.58	NA	1	1.94	1.28	NA	NA	NA	NA	1.05	NA	0.87	0.87	1.18	0.53	NA	0.9
P05362	457	ICAM1	ICAM1_HUMAN Intercellular adhesion molecule 1 OS=Homo sapiens OX=9606 GN=ICAM1 PE=1 SV=2	|DLEGTYLC(BTD[C])R	NA	NA	0.88	NA	NA	NA	NA	NA	NA	NA	NA	NA	NA	NA	NA	NA	NA	NA	NA	NA	NA	NA	NA	NA	NA	NA	NA	NA	NA	NA	NA	NA	NA	NA	NA	NA	NA	NA	NA	NA	NA	NA	NA	NA	NA
P05386	61	RPLP1	RLA1_HUMAN 60S acidic ribosomal protein P1 OS=Homo sapiens OX=9606 GN=RPLP1 PE=1 SV=1	ALANVNIGSLIC(BTD[C])NVGAGGPAPAAGAAPAGGPAPSTAAAPAEEK|	NA	NA	NA	NA	NA	NA	NA	0.57	NA	NA	NA	NA	NA	NA	NA	NA	NA	NA	NA	NA	NA	NA	NA	NA	NA	NA	NA	NA	NA	NA	NA	NA	NA	NA	NA	NA	NA	NA	NA	NA	NA	NA	1	NA	NA
P05388	27	RPLP0	RLA0_HUMAN 60S acidic ribosomal protein P0 OS=Homo sapiens OX=9606 GN=RPLP0 PE=1 SV=1	C(BTD[C])FIVGADNVGSK|	0.67	NA	NA	NA	0.81	NA	1.16	1.14	NA	0.83	NA	NA	NA	NA	NA	NA	NA	NA	NA	NA	NA	NA	2.19	NA	NA	NA	NA	2.31	NA	NA	NA	NA	NA	NA	NA	NA	NA	0.63	NA	NA	NA	NA	0.65	0.63	0.6
P05388	119	RPLP0	RLA0_HUMAN 60S acidic ribosomal protein P0 OS=Homo sapiens OX=9606 GN=RPLP0 PE=1 SV=1	AGAIAPC(BTD[C])EVTVPAQNTGLGPEK|	0.44	2.67	0.89	0.43	0.44	1.23	0.7	0.51	0.99	0.56	1.08	0.85	0.71	0.98	1.18	0.94	0.64	1.03	0.7	0.45	0.83	1.8	0.69	0.86	0.77	0.95	NA	NA	2.92	1.04	1.12	1.6	1.03	0.97	NA	NA	NA	0.61	0.93	0.56	NA	0.68	0.81	NA	0.65
P05455	245	SSB	LA_HUMAN Lupus La protein OS=Homo sapiens OX=9606 GN=SSB PE=1 SV=2	FSGDLDDQTC(BTD[C])R|FSGDLDDQTC(BTD[C])R	NA	5.22	1.51	0.63	NA	NA	NA	NA	NA	NA	NA	1.11	0.88	NA	0.98	1.09	0.98	NA	0.46	0.44	0.93	NA	NA	1.2	1.19	NA	NA	NA	NA	NA	NA	1.44	1.11	NA	NA	NA	0.65	0.68	NA	0.66	0.75	0.9	1.09	0.96	0.61
P05556	691	ITGB1	ITB1_HUMAN Integrin beta-1 OS=Homo sapiens OX=9606 GN=ITGB1 PE=1 SV=2	DKLPQPVQPDPVSHC(BTD[C])K|DKLPQPVQPDPVSHC(BTD[C])K	0.59	4.15	0.97	0.52	0.58	1.32	0.93	0.84	0.98	0.62	0.84	1.09	1.46	NA	NA	0.94	0.94	1.06	0.72	0.51	0.91	1.88	0.88	1.01	0.96	1.06	2.35	0.29	NA	NA	NA	NA	NA	NA	NA	NA	NA	NA	NA	0.35	0.35	0.62	NA	0.82	0.49
P05556	649	ITGB1	ITB1_HUMAN Integrin beta-1 OS=Homo sapiens OX=9606 GN=ITGB1 PE=1 SV=2	ECVQC(BTD[C])R|ECVQC(BTD[C])R	NA	1.29	1	0.84	NA	0.96	NA	NA	NA	NA	NA	1.14	NA	NA	NA	0.89	1.55	0.78	NA	NA	0.88	1.04	NA	0.69	0.85	0.79	NA	NA	NA	NA	NA	NA	NA	NA	NA	NA	NA	NA	NA	NA	NA	NA	NA	NA	NA
P05556	574	ITGB1	ITB1_HUMAN Integrin beta-1 OS=Homo sapiens OX=9606 GN=ITGB1 PE=1 SV=2	SNGLICGGNGVC(BTD[C])K|	NA	NA	NA	0.98	NA	NA	NA	NA	NA	NA	NA	NA	NA	NA	NA	NA	NA	NA	NA	NA	NA	NA	NA	NA	NA	NA	NA	NA	NA	NA	NA	NA	NA	NA	NA	NA	NA	NA	NA	NA	NA	NA	NA	NA	NA
P05771	586	PRKCB	KPCB_HUMAN Protein kinase C beta type OS=Homo sapiens OX=9606 GN=PRKCB PE=1 SV=4	|LGC(BTD[C])GPEGER	NA	NA	1.09	NA	NA	1.36	NA	NA	NA	NA	NA	1.23	NA	NA	NA	1.44	1.2	1.7	NA	NA	0.56	2.43	NA	1.14	1.13	1.23	NA	NA	NA	NA	NA	NA	NA	NA	NA	NA	NA	NA	NA	NA	NA	NA	NA	1.43	NA
P05771	488	PRKCB	KPCB_HUMAN Protein kinase C beta type OS=Homo sapiens OX=9606 GN=PRKCB PE=1 SV=4	|IADFGMC(BTD[C])K	NA	2.24	NA	NA	NA	NA	NA	NA	NA	NA	NA	0.93	NA	NA	NA	NA	NA	NA	NA	NA	1.19	NA	NA	1.31	1	NA	NA	NA	NA	NA	NA	NA	NA	NA	NA	NA	NA	NA	NA	NA	NA	NA	NA	NA	NA
P06132	294	UROD	DCUP_HUMAN Uroporphyrinogen decarboxylase OS=Homo sapiens OX=9606 GN=UROD PE=1 SV=2	AREC(BTD[C])VGK|AREC(BTD[C])VGK	NA	NA	0.57	NA	NA	0.94	0.62	NA	1.02	NA	NA	0.73	0.9	NA	NA	0.61	0.51	0.63	0.67	NA	0.69	2.07	NA	0.58	0.76	0.77	1.42	NA	NA	NA	NA	NA	NA	NA	NA	NA	NA	NA	NA	NA	NA	NA	NA	NA	NA
P06132	59	UROD	DCUP_HUMAN Uroporphyrinogen decarboxylase OS=Homo sapiens OX=9606 GN=UROD PE=1 SV=2	AAQDFFSTC(BTD[C])R|AAQDFFSTC(BTD[C])R	NA	NA	0.98	0.61	0.98	NA	NA	0.83	NA	NA	0.6	NA	NA	NA	NA	1.12	0.74	NA	0.9	NA	NA	NA	0.96	NA	1.02	1.26	NA	NA	NA	NA	NA	NA	NA	NA	NA	NA	NA	NA	NA	NA	0.42	NA	NA	NA	NA
P06132	66	UROD	DCUP_HUMAN Uroporphyrinogen decarboxylase OS=Homo sapiens OX=9606 GN=UROD PE=1 SV=2	SPEACC(BTD[C])ELTLQPLR|	NA	NA	NA	0.85	NA	NA	NA	NA	NA	NA	NA	NA	NA	NA	NA	NA	NA	NA	0.95	NA	NA	NA	NA	NA	NA	NA	NA	NA	NA	NA	1.54	NA	NA	NA	NA	0.44	NA	0.61	NA	0.49	0.46	NA	NA	0.56	0.41
P06132	65	UROD	DCUP_HUMAN Uroporphyrinogen decarboxylase OS=Homo sapiens OX=9606 GN=UROD PE=1 SV=2	|SPEAC(BTD[C])CELTLQPLR	NA	NA	NA	NA	NA	NA	NA	NA	NA	NA	NA	NA	NA	NA	NA	NA	NA	NA	NA	NA	NA	NA	NA	NA	NA	NA	NA	NA	NA	NA	NA	NA	NA	NA	NA	NA	NA	NA	NA	NA	NA	1.18	NA	NA	NA
P06213	462	INSR	INSR_HUMAN Insulin receptor OS=Homo sapiens OX=9606 GN=INSR PE=1 SV=4	LC(BTD[C])LSEIHK|	NA	NA	NA	NA	NA	NA	NA	NA	NA	NA	NA	NA	NA	NA	NA	NA	NA	NA	NA	NA	NA	NA	NA	NA	NA	NA	NA	NA	NA	NA	NA	NA	NA	NA	NA	NA	NA	NA	NA	NA	NA	NA	NA	NA	NA
P06400	438	RB1	RB_HUMAN Retinoblastoma-associated protein OS=Homo sapiens OX=9606 GN=RB1 PE=1 SV=2	AVGQGC(BTD[C])VEIGSQR|AVGQGC(BTD[C])VEIGSQR	NA	NA	NA	NA	NA	0.97	NA	NA	0.96	NA	NA	1	NA	NA	NA	0.95	0.51	0.82	NA	NA	1.04	0.98	NA	0.73	0.73	0.98	NA	NA	NA	NA	NA	NA	NA	NA	NA	NA	NA	NA	NA	NA	NA	NA	NA	NA	NA
P06400	666	RB1	RB_HUMAN Retinoblastoma-associated protein OS=Homo sapiens OX=9606 GN=RB1 PE=1 SV=2	|LNTLC(BTD[C])ER	NA	NA	0.81	0.55	NA	1.45	NA	0.49	1.03	NA	NA	1.11	0.72	NA	NA	NA	0.42	NA	1.67	NA	NA	2.18	NA	NA	NA	1.15	3.3	NA	NA	NA	NA	NA	NA	NA	NA	NA	NA	NA	NA	NA	NA	NA	NA	NA	NA
P06400	283	RB1	RB_HUMAN Retinoblastoma-associated protein OS=Homo sapiens OX=9606 GN=RB1 PE=1 SV=2	EHEC(BTD[C])NIDEVK|	NA	NA	NA	NA	0.78	NA	NA	NA	NA	NA	NA	1	NA	NA	NA	NA	0.92	NA	0.72	NA	1.2	NA	1.09	1.02	1.07	1.42	NA	NA	NA	NA	NA	NA	NA	NA	NA	NA	NA	NA	NA	NA	NA	NA	NA	NA	NA
P06400	278	RB1	RB_HUMAN Retinoblastoma-associated protein OS=Homo sapiens OX=9606 GN=RB1 PE=1 SV=2	|IIEVLC(BTD[C])K	NA	1.54	NA	0.5	NA	1.09	NA	NA	0.87	NA	NA	0.97	0.65	NA	NA	NA	0.76	NA	0.79	NA	1.05	1.43	NA	0.79	NA	1.17	NA	NA	NA	NA	NA	NA	NA	NA	NA	NA	NA	NA	NA	NA	NA	NA	NA	NA	NA
P06400	853	RB1	RB_HUMAN Retinoblastoma-associated protein OS=Homo sapiens OX=9606 GN=RB1 PE=1 SV=2	INQMVC(BTD[C])NSDR|INQMVC(BTD[C])NSDR	NA	NA	NA	NA	3.15	0.92	NA	0.88	NA	NA	NA	0.76	0.92	NA	0.9	0.89	0.66	0.9	NA	NA	0.98	NA	3.04	0.66	0.75	0.88	1.79	NA	NA	NA	NA	NA	NA	NA	NA	NA	NA	NA	NA	NA	NA	NA	NA	NA	NA
P06730	170	EIF4E	IF4E_HUMAN Eukaryotic translation initiation factor 4E OS=Homo sapiens OX=9606 GN=EIF4E PE=1 SV=2	IAIWTTEC(BTD[C])ENR|	NA	NA	NA	NA	NA	NA	NA	NA	NA	NA	NA	NA	NA	NA	NA	NA	NA	NA	NA	NA	NA	NA	NA	NA	1.08	NA	NA	NA	NA	NA	NA	NA	NA	NA	NA	NA	NA	NA	NA	NA	NA	NA	NA	NA	NA
P06733	339	ENO1	ENOA_HUMAN Alpha-enolase OS=Homo sapiens OX=9606 GN=ENO1 PE=1 SV=2	SCNC(BTD[C])LLLK|SCNC(BTD[C])LLLK	NA	1	1.22	0.63	NA	0.97	1.72	1.96	1.7	1.09	NA	NA	1.94	NA	NA	1	0.87	0.93	0.81	0.43	1.07	NA	2.25	0.9	1.11	0.67	1.91	0.29	0.73	0.96	NA	NA	NA	NA	NA	NA	NA	0.44	1.63	NA	0.34	0.52	0.5	0.32	0.41
P06733	337	ENO1	ENOA_HUMAN Alpha-enolase OS=Homo sapiens OX=9606 GN=ENO1 PE=1 SV=2	SC(BTD[C])NCLLLK|SC(BTD[C])NCLLLK	1.15	1.3	0.9	0.67	1.47	1.11	2.09	NA	1.11	0.79	1.69	1.3	0.98	1.96	4.27	0.86	0.67	0.85	1.22	0.48	0.85	NA	NA	0.77	0.79	0.74	1.72	0.3	0.91	NA	NA	10.66	NA	1.21	1.88	0.47	NA	0.94	2.02	0.49	0.42	0.99	0.71	0.52	NA
P06733	357	ENO1	ENOA_HUMAN Alpha-enolase OS=Homo sapiens OX=9606 GN=ENO1 PE=1 SV=2	VNQIGSVTESIQAC(BTD[C])K|	0.65	NA	NA	NA	0.65	1.1	NA	0.83	1.01	NA	0.71	NA	NA	1.02	NA	NA	NA	1	NA	NA	NA	NA	0.9	NA	NA	NA	1.92	0.14	1.66	0.48	0.39	2.13	NA	1.05	2.36	0.38	0.37	0.37	1.18	0.26	0.25	NA	0.27	0.42	0.43
P06737	79	PYGL	PYGL_HUMAN Glycogen phosphorylase, liver form OS=Homo sapiens OX=9606 GN=PYGL PE=1 SV=4	TQQHYYDKC(BTD[C])PK|	NA	NA	0.78	NA	NA	1.65	NA	0.52	1.01	NA	NA	NA	NA	NA	NA	1.18	0.7	NA	NA	NA	1.19	1.35	NA	1.19	0.83	1.82	NA	NA	NA	NA	NA	NA	NA	NA	NA	NA	NA	NA	NA	NA	NA	NA	NA	NA	NA
P06737	784	PYGL	PYGL_HUMAN Glycogen phosphorylase, liver form OS=Homo sapiens OX=9606 GN=PYGL PE=1 SV=4	VFADYEAYVKC(BTD[C])QDK|	NA	NA	NA	NA	NA	NA	NA	NA	NA	NA	NA	NA	NA	NA	NA	NA	NA	NA	NA	NA	NA	NA	NA	1.09	NA	NA	NA	NA	NA	NA	NA	NA	NA	NA	NA	0.57	NA	NA	NA	NA	NA	NA	NA	NA	NA
P06737	446	PYGL	PYGL_HUMAN Glycogen phosphorylase, liver form OS=Homo sapiens OX=9606 GN=PYGL PE=1 SV=4	|INMAHLC(BTD[C])IVGSHAVNGVAK	NA	NA	NA	NA	NA	NA	NA	NA	NA	NA	NA	NA	NA	NA	NA	NA	NA	NA	NA	NA	NA	NA	NA	NA	NA	NA	NA	NA	NA	0.33	NA	NA	NA	NA	NA	NA	NA	NA	NA	NA	NA	NA	NA	NA	NA
P06744	404	GPI	G6PI_HUMAN Glucose-6-phosphate isomerase OS=Homo sapiens OX=9606 GN=GPI PE=1 SV=4	MIPC(BTD[C])DFLIPVQTQHPIR|	NA	NA	0.96	0.47	0.94	NA	1.23	0.98	NA	0.56	NA	1.22	NA	1.1	1.11	0.92	0.9	NA	NA	NA	1.78	NA	NA	1	1.1	1.02	NA	0.27	0.82	NA	NA	NA	NA	1.13	1.75	NA	0.97	0.52	NA	NA	0.61	NA	0.79	0.86	0.78
P06748	21	NPM1	NPM_HUMAN Nucleophosmin OS=Homo sapiens OX=9606 GN=NPM1 PE=1 SV=2	|PQNYLFGC(BTD[C])ELK NYLFGC(BTD[C])ELK	NA	2.41	1.3	0.58	NA	NA	NA	NA	NA	NA	1.05	1.71	0.96	NA	NA	1.19	1.15	1.42	1.07	NA	0.99	1.79	1.4	0.97	1.1	1.02	NA	0.08	0.99	NA	NA	2.37	NA	2.04	1.17	NA	0.92	0.44	1.04	NA	0.3	0.46	0.31	0.6	0.45
P06753	191	TPM3	TPM3_HUMAN Tropomyosin alpha-3 chain OS=Homo sapiens OX=9606 GN=TPM3 PE=1 SV=2	AELAESKC(BTD[C])SELEEELK|AELAESKC(BTD[C])SELEEELK	NA	NA	NA	0.69	NA	NA	1.18	0.98	NA	NA	NA	NA	NA	NA	NA	NA	NA	NA	NA	0.61	NA	NA	NA	NA	NA	NA	NA	0.43	1.33	NA	NA	NA	0.9	NA	NA	NA	NA	NA	NA	NA	NA	NA	NA	NA	NA
P06756	502	ITGAV	ITAV_HUMAN Integrin alpha-V OS=Homo sapiens OX=9606 GN=ITGAV PE=1 SV=2	VSC(BTD[C])FNVR|	NA	NA	NA	0.62	NA	NA	NA	NA	NA	NA	0.75	NA	NA	NA	NA	NA	NA	1	0.92	0.79	0.39	NA	NA	0.52	NA	0.4	NA	0.39	NA	NA	NA	NA	NA	NA	NA	NA	NA	NA	NA	NA	NA	NA	NA	NA	NA
P06756	491	ITGAV	ITAV_HUMAN Integrin alpha-V OS=Homo sapiens OX=9606 GN=ITGAV PE=1 SV=2	TC(BTD[C])SLPGTALK|	NA	NA	NA	NA	NA	NA	NA	NA	NA	NA	NA	NA	NA	NA	NA	NA	NA	NA	0.79	NA	NA	NA	NA	NA	NA	NA	NA	NA	NA	NA	NA	NA	NA	NA	NA	NA	NA	NA	NA	NA	NA	NA	NA	NA	NA
P06756	914	ITGAV	ITAV_HUMAN Integrin alpha-V OS=Homo sapiens OX=9606 GN=ITGAV PE=1 SV=2	|IVC(BTD[C])QVGR	NA	NA	NA	NA	NA	NA	NA	NA	NA	NA	NA	NA	NA	NA	NA	NA	NA	NA	NA	NA	0.97	NA	NA	NA	NA	NA	NA	NA	NA	NA	NA	NA	NA	NA	NA	NA	NA	NA	NA	NA	NA	NA	NA	NA	NA
P06756	698	ITGAV	ITAV_HUMAN Integrin alpha-V OS=Homo sapiens OX=9606 GN=ITGAV PE=1 SV=2	LSC(BTD[C])AFK|LSC(BTD[C])AFK	NA	NA	NA	NA	NA	NA	NA	NA	NA	NA	NA	NA	NA	NA	NA	NA	1.08	NA	NA	NA	NA	NA	NA	NA	NA	0.47	NA	NA	NA	NA	NA	NA	NA	NA	NA	NA	NA	NA	NA	NA	NA	NA	NA	NA	NA
P06756	97	ITGAV	ITAV_HUMAN Integrin alpha-V OS=Homo sapiens OX=9606 GN=ITGAV PE=1 SV=2	|RC(BTD[C])QPIEFDATGNR	NA	NA	NA	NA	NA	NA	NA	NA	NA	NA	NA	NA	NA	NA	NA	NA	NA	NA	NA	NA	NA	NA	NA	NA	NA	NA	NA	NA	NA	NA	NA	NA	NA	NA	NA	NA	0.81	NA	NA	NA	NA	NA	NA	NA	NA
P06865	505	HEXA	HEXA_HUMAN Beta-hexosaminidase subunit alpha OS=Homo sapiens OX=9606 GN=HEXA PE=1 SV=2	LSHFRC(BTD[C])ELLR|	NA	NA	NA	NA	NA	NA	NA	NA	NA	NA	NA	NA	NA	NA	NA	0.92	NA	NA	NA	NA	NA	NA	NA	NA	NA	NA	NA	NA	NA	NA	NA	NA	NA	NA	NA	NA	NA	NA	NA	NA	NA	NA	NA	NA	NA
P07093	136	SERPINE2	GDN_HUMAN Glia-derived nexin OS=Homo sapiens OX=9606 GN=SERPINE2 PE=1 SV=1	NKDVFQC(BTD[C])EVR|	NA	NA	NA	NA	NA	NA	NA	NA	NA	NA	NA	NA	NA	NA	NA	NA	NA	NA	NA	NA	NA	NA	NA	NA	NA	NA	NA	NA	NA	NA	NA	NA	NA	NA	NA	NA	NA	NA	NA	NA	NA	NA	NA	NA	NA
P07099	80	EPHX1	HYEP_HUMAN Epoxide hydrolase 1 OS=Homo sapiens OX=9606 GN=EPHX1 PE=1 SV=1	FTPPLEDSC(BTD[C])FHYGFNSNYLK|	NA	NA	NA	NA	NA	NA	NA	NA	NA	NA	NA	NA	NA	NA	NA	NA	NA	NA	NA	NA	0.7	NA	NA	NA	NA	NA	NA	NA	NA	NA	NA	NA	NA	NA	NA	NA	NA	NA	NA	NA	NA	NA	NA	NA	NA
P07199	65	CENPB	CENPB_HUMAN Major centromere autoantigen B OS=Homo sapiens OX=9606 GN=CENPB PE=1 SV=2	YGVASTC(BTD[C])R|	NA	NA	1.04	NA	NA	NA	NA	NA	1.33	NA	NA	NA	NA	NA	NA	NA	NA	NA	NA	NA	1	NA	NA	1.02	1.05	NA	1.21	NA	NA	NA	NA	NA	NA	NA	NA	NA	NA	NA	NA	NA	NA	NA	NA	NA	NA
P07199	135	CENPB	CENPB_HUMAN Major centromere autoantigen B OS=Homo sapiens OX=9606 GN=CENPB PE=1 SV=2	HGVVSC(BTD[C])SGVAR|	NA	NA	NA	NA	NA	NA	NA	NA	0.89	NA	NA	NA	NA	NA	NA	NA	NA	NA	NA	NA	NA	NA	NA	NA	NA	0.76	NA	NA	NA	NA	NA	NA	NA	1.06	NA	NA	NA	NA	NA	NA	NA	NA	NA	NA	NA
P07237	312	P4HB	PDIA1_HUMAN Protein disulfide-isomerase OS=Homo sapiens OX=9606 GN=P4HB PE=1 SV=3	KEEC(BTD[C])PAVR EEC(BTD[C])PAVR|KEEC(BTD[C])PAVR EEC(BTD[C])PAVR	0.5	3.37	0.82	0.85	0.44	1.58	0.79	0.49	1	0.59	0.93	1.02	2.46	1.01	1.94	1.08	0.68	1.06	0.95	0.73	1.17	2.56	0.77	1.01	0.9	1.21	2	0.57	5.15	0.48	0.45	1.61	1.12	0.96	2.09	0.33	0.88	0.51	1.03	0.5	0.48	0.67	0.54	0.76	0.65
P07237	343	P4HB	PDIA1_HUMAN Protein disulfide-isomerase OS=Homo sapiens OX=9606 GN=P4HB PE=1 SV=3	|ITEFC(BTD[C])HR	0.74	2.02	1.31	0.35	0.91	1.8	1.21	0.98	1.49	0.45	1.04	1.87	0.73	1.18	1.6	1.2	0.63	1.65	0.74	0.36	1.24	2.04	1.11	1.18	1.06	1.52	5.83	0.13	1.05	0.11	0.09	2.62	1.14	1.73	NA	0.05	0.82	0.44	1.35	0.37	0.32	0.52	0.43	0.62	0.51
P07339	329	CTSD	CATD_HUMAN Cathepsin D OS=Homo sapiens OX=9606 GN=CTSD PE=1 SV=1	AIGAVPLIQGEYMIPC(BTD[C])EK|	NA	NA	NA	NA	0.77	NA	1.06	NA	NA	NA	NA	NA	NA	NA	NA	NA	NA	NA	NA	NA	NA	NA	NA	NA	0.76	NA	NA	NA	NA	NA	NA	NA	NA	NA	NA	NA	NA	NA	NA	NA	0.83	NA	NA	NA	NA
P07355	133	ANXA2	ANXA2_HUMAN Annexin A2 OS=Homo sapiens OX=9606 GN=ANXA2 PE=1 SV=2	LEIIC(BTD[C])SR|LEIIC(BTD[C])SR	NA	NA	NA	NA	NA	NA	NA	NA	NA	NA	NA	NA	NA	NA	NA	NA	NA	NA	NA	NA	NA	NA	NA	NA	NA	NA	NA	NA	NA	NA	NA	NA	NA	NA	NA	NA	NA	NA	NA	NA	NA	NA	NA	NA	NA
P07384	590	CAPN1	CAN1_HUMAN Calpain-1 catalytic subunit OS=Homo sapiens OX=9606 GN=CAPN1 PE=1 SV=1	GFSLESC(BTD[C])R|	NA	1.48	0.97	NA	NA	NA	NA	NA	NA	NA	NA	1.46	NA	NA	NA	1.04	0.65	1.45	NA	NA	NA	NA	NA	1.17	1.06	NA	NA	NA	NA	NA	NA	NA	NA	NA	NA	0.1	NA	NA	NA	NA	NA	NA	NA	NA	NA
P07384	351	CAPN1	CAN1_HUMAN Calpain-1 catalytic subunit OS=Homo sapiens OX=9606 GN=CAPN1 PE=1 SV=1	|LEIC(BTD[C])NLTPDALK	NA	NA	1.03	NA	0.76	NA	NA	NA	NA	NA	NA	1.17	NA	NA	NA	1.07	0.73	NA	NA	NA	0.88	NA	NA	1.07	0.98	NA	NA	NA	NA	NA	NA	NA	NA	NA	NA	NA	NA	NA	NA	0.42	0.46	0.51	0.26	0.48	0.33
P07384	49	CAPN1	CAN1_HUMAN Calpain-1 catalytic subunit OS=Homo sapiens OX=9606 GN=CAPN1 PE=1 SV=1	VRC(BTD[C])LQSGTLFR|	NA	NA	NA	NA	NA	NA	NA	NA	NA	NA	NA	NA	NA	NA	NA	NA	NA	0.77	NA	NA	NA	1.19	NA	NA	NA	NA	NA	NA	NA	NA	NA	NA	NA	0.79	1.11	NA	NA	NA	NA	NA	NA	NA	NA	NA	NA
P07437	354	TUBB	TBB5_HUMAN Tubulin beta chain OS=Homo sapiens OX=9606 GN=TUBB PE=1 SV=2	|TAVC(BTD[C])DIPPR	NA	NA	NA	NA	0.51	1.3	0.71	0.62	0.98	0.66	NA	1.02	NA	NA	NA	NA	NA	NA	NA	NA	NA	2.07	NA	NA	NA	NA	NA	NA	NA	NA	NA	NA	NA	NA	NA	NA	NA	NA	NA	NA	NA	NA	NA	NA	NA
P07437	12	TUBB	TBB5_HUMAN Tubulin beta chain OS=Homo sapiens OX=9606 GN=TUBB PE=1 SV=2	|AGQC(BTD[C])GNQIGAK EIVHIQAGQC(BTD[C])GNQIGAK	NA	NA	NA	NA	0.32	NA	NA	NA	NA	0.63	NA	NA	NA	NA	NA	NA	NA	NA	NA	NA	NA	2.25	NA	NA	NA	NA	NA	NA	NA	NA	NA	NA	NA	NA	NA	NA	NA	NA	NA	NA	NA	NA	NA	NA	NA
P07602	412	PSAP	SAP_HUMAN Prosaposin OS=Homo sapiens OX=9606 GN=PSAP PE=1 SV=2	|DGGFCEVC(BTD[C])K	NA	NA	NA	0.29	NA	NA	NA	NA	NA	NA	1.02	NA	0.31	NA	1.21	NA	NA	NA	NA	0.27	NA	NA	NA	NA	NA	NA	NA	6.35	NA	NA	NA	NA	NA	NA	NA	NA	NA	0.36	NA	0.26	0.17	0.47	0.31	NA	NA
P07602	42	PSAP	SAP_HUMAN Prosaposin OS=Homo sapiens OX=9606 GN=PSAP PE=1 SV=2	TASDC(BTD[C])GAVK|TASDC(BTD[C])GAVK	NA	NA	NA	0.83	NA	NA	NA	NA	NA	NA	0.92	1.08	NA	NA	NA	1.22	NA	NA	1.12	NA	0.84	NA	NA	0.48	0.77	0.73	NA	NA	NA	NA	NA	NA	NA	NA	NA	NA	NA	0.45	NA	NA	NA	NA	NA	NA	NA
P07602	482	PSAP	SAP_HUMAN Prosaposin OS=Homo sapiens OX=9606 GN=PSAP PE=1 SV=2	IGAC(BTD[C])PSAHKPLLGTEK|	NA	NA	NA	0.82	NA	NA	NA	NA	NA	NA	0.93	NA	2.09	NA	NA	NA	NA	NA	0.98	0.98	NA	NA	NA	NA	NA	NA	NA	NA	NA	NA	NA	NA	NA	NA	NA	NA	NA	NA	NA	NA	NA	NA	NA	NA	NA
P07711	322	CTSL	CATL1_HUMAN Cathepsin L1 OS=Homo sapiens OX=9606 GN=CTSL PE=1 SV=2	NHC(BTD[C])GIASAASYPTV|	NA	NA	NA	NA	NA	NA	NA	NA	NA	NA	NA	NA	NA	NA	NA	NA	NA	NA	NA	NA	NA	NA	NA	NA	NA	0.38	NA	NA	NA	NA	NA	NA	NA	NA	NA	NA	NA	NA	NA	NA	NA	NA	NA	NA	NA
P07737	71	PFN1	PROF1_HUMAN Profilin-1 OS=Homo sapiens OX=9606 GN=PFN1 PE=1 SV=2	SSFYVNGLTLGGQKC(BTD[C])SVIR|SSFYVNGLTLGGQKC(BTD[C])SVIR	NA	NA	NA	NA	0.44	NA	NA	NA	NA	NA	NA	NA	NA	NA	2.24	NA	NA	NA	NA	NA	NA	NA	NA	0.95	NA	NA	NA	NA	NA	0.15	0.1	1.05	2.61	1.22	3.96	0.33	1.05	NA	0.77	NA	0.13	NA	0.5	NA	0.15
P07814	697	EPRS	SYEP_HUMAN Bifunctional glutamate/proline--tRNA ligase OS=Homo sapiens OX=9606 GN=EPRS PE=1 SV=5	EAPC(BTD[C])VLIYIPDGHTK|	NA	NA	NA	NA	NA	NA	1.12	0.91	NA	0.8	NA	NA	NA	NA	NA	NA	NA	NA	NA	NA	NA	NA	NA	NA	NA	NA	NA	0.18	NA	NA	NA	NA	NA	NA	NA	NA	NA	0.26	NA	NA	NA	NA	0.14	NA	NA
P07814	1377	EPRS	SYEP_HUMAN Bifunctional glutamate/proline--tRNA ligase OS=Homo sapiens OX=9606 GN=EPRS PE=1 SV=5	SC(BTD[C])QFVAVR|	NA	2.65	NA	0.48	0.53	1.34	0.69	0.66	1.37	0.51	0.97	1.07	0.8	1.01	1.47	NA	0.77	1.05	0.85	0.5	1.24	2.2	NA	1.63	NA	1.07	1.57	NA	1.07	0.82	1.02	1.41	NA	0.97	1	0.73	0.95	NA	NA	0.84	0.73	0.73	1.13	0.85	0.75
P07814	660	EPRS	SYEP_HUMAN Bifunctional glutamate/proline--tRNA ligase OS=Homo sapiens OX=9606 GN=EPRS PE=1 SV=5	HEELMLGDPC(BTD[C])LK|	NA	NA	NA	0.54	NA	NA	NA	NA	1.19	NA	NA	NA	0.76	NA	NA	NA	NA	1.45	NA	1.02	0.95	NA	1.15	NA	0.89	NA	NA	NA	NA	NA	NA	NA	NA	NA	NA	NA	NA	NA	NA	NA	NA	0.84	NA	1.01	NA
P07814	1148	EPRS	SYEP_HUMAN Bifunctional glutamate/proline--tRNA ligase OS=Homo sapiens OX=9606 GN=EPRS PE=1 SV=5	|LNQWC(BTD[C])NVVR	NA	2.03	NA	0.59	NA	NA	NA	NA	1.37	NA	NA	1.25	0.96	NA	NA	NA	0.74	NA	0.5	0.32	1.34	1.72	NA	1.01	1.12	1.32	1.8	NA	NA	0.73	NA	NA	NA	NA	NA	NA	NA	NA	NA	NA	NA	NA	NA	NA	NA
P07814	336	EPRS	SYEP_HUMAN Bifunctional glutamate/proline--tRNA ligase OS=Homo sapiens OX=9606 GN=EPRS PE=1 SV=5	GSQFGQSC(BTD[C])CLR|GSQFGQSC(BTD[C])CLR	NA	NA	NA	NA	NA	0.68	NA	NA	NA	NA	NA	1.22	1.06	NA	NA	1.04	NA	NA	0.93	NA	0.81	NA	NA	0.91	0.86	0.69	NA	NA	NA	NA	NA	NA	NA	NA	NA	NA	NA	NA	NA	NA	NA	NA	NA	NA	NA
P07814	744	EPRS	SYEP_HUMAN Bifunctional glutamate/proline--tRNA ligase OS=Homo sapiens OX=9606 GN=EPRS PE=1 SV=5	ERPTPSLNNNC(BTD[C])TTSEDSLVLYNR|	NA	NA	NA	NA	0.46	NA	NA	0.52	NA	NA	NA	NA	NA	0.87	NA	1.01	0.97	NA	NA	NA	NA	NA	0.58	1.32	NA	NA	NA	NA	NA	NA	1.59	NA	1.11	0.95	0.93	NA	0.95	0.83	0.89	0.87	0.75	0.74	1.41	0.81	0.8
P07814	1487	EPRS	SYEP_HUMAN Bifunctional glutamate/proline--tRNA ligase OS=Homo sapiens OX=9606 GN=EPRS PE=1 SV=5	SLCIPFKPLC(BTD[C])ELQPGAK|	NA	NA	0.61	NA	NA	NA	NA	NA	NA	NA	NA	0.99	NA	1.24	NA	0.88	0.78	NA	NA	NA	NA	NA	NA	0.82	NA	0.67	NA	0.93	NA	NA	NA	2.7	NA	1.16	NA	NA	1.3	NA	NA	NA	NA	NA	1.07	NA	0.45
P07814	856	EPRS	SYEP_HUMAN Bifunctional glutamate/proline--tRNA ligase OS=Homo sapiens OX=9606 GN=EPRS PE=1 SV=5	INEAVEC(BTD[C])LLSLK|	NA	NA	NA	NA	0.56	NA	NA	NA	NA	NA	NA	NA	NA	NA	NA	NA	NA	NA	NA	NA	NA	NA	NA	NA	NA	NA	NA	NA	NA	NA	NA	NA	NA	NA	NA	NA	NA	NA	NA	NA	NA	NA	NA	NA	NA
P07814	337	EPRS	SYEP_HUMAN Bifunctional glutamate/proline--tRNA ligase OS=Homo sapiens OX=9606 GN=EPRS PE=1 SV=5	GSQFGQSCC(BTD[C])LR|	NA	NA	0.8	NA	NA	NA	NA	NA	NA	NA	NA	0.81	NA	NA	NA	0.92	1.36	0.87	NA	NA	0.85	NA	NA	0.6	0.73	0.68	NA	NA	NA	NA	NA	NA	1.63	NA	NA	NA	NA	NA	NA	NA	NA	NA	NA	NA	NA
P07814	1480	EPRS	SYEP_HUMAN Bifunctional glutamate/proline--tRNA ligase OS=Homo sapiens OX=9606 GN=EPRS PE=1 SV=5	SLC(BTD[C])IPFKPLCELQPGAK|SLC(BTD[C])IPFKPLCELQPGAK	NA	NA	NA	0.63	NA	NA	NA	NA	NA	NA	NA	1.43	NA	NA	NA	NA	1.23	NA	0.85	NA	NA	NA	NA	0.73	0.6	1.26	NA	NA	NA	NA	NA	3.07	NA	1.15	NA	NA	NA	0.68	1.05	0.33	NA	NA	NA	0.66	NA
P07814	350	EPRS	SYEP_HUMAN Bifunctional glutamate/proline--tRNA ligase OS=Homo sapiens OX=9606 GN=EPRS PE=1 SV=5	|IDMSSNNGC(BTD[C])MR	NA	NA	NA	NA	NA	NA	NA	NA	NA	NA	NA	0.98	NA	NA	NA	0.63	0.75	NA	NA	NA	NA	NA	NA	NA	NA	1.48	NA	NA	NA	NA	NA	NA	NA	NA	NA	NA	NA	NA	NA	NA	NA	NA	NA	NA	NA
P07814	1327	EPRS	SYEP_HUMAN Bifunctional glutamate/proline--tRNA ligase OS=Homo sapiens OX=9606 GN=EPRS PE=1 SV=5	|EALIAKC(BTD[C])NDYR	NA	NA	NA	NA	NA	NA	NA	NA	NA	NA	NA	NA	NA	NA	NA	NA	NA	NA	NA	NA	NA	NA	NA	NA	NA	NA	NA	NA	NA	NA	NA	NA	NA	NA	NA	0.61	NA	NA	NA	NA	NA	NA	NA	NA	NA
P07858	319	CTSB	CATB_HUMAN Cathepsin B OS=Homo sapiens OX=9606 GN=CTSB PE=1 SV=3	GQDHC(BTD[C])GIESEVVAGIPR|GQDHC(BTD[C])GIESEVVAGIPR	NA	NA	1.58	NA	0.78	NA	NA	NA	NA	NA	NA	2.65	NA	NA	NA	1.35	1.07	1.57	NA	NA	NA	1.74	NA	1.47	NA	1.21	NA	NA	1.08	0.91	NA	NA	NA	NA	NA	0.93	NA	NA	NA	0.5	0.42	0.43	0.37	0.75	NA
P07858	59	CTSB	CATB_HUMAN Cathepsin B OS=Homo sapiens OX=9606 GN=CTSB PE=1 SV=3	LC(BTD[C])GTFLGGPKPPQR|	NA	NA	NA	NA	NA	NA	NA	NA	1.24	NA	NA	1.07	NA	NA	NA	0.91	0.77	0.92	NA	NA	0.8	1.3	NA	NA	0.86	1.03	NA	NA	NA	NA	NA	NA	NA	NA	NA	NA	NA	NA	NA	0.56	NA	NA	NA	0.82	0.45
P07858	211	CTSB	CATB_HUMAN Cathepsin B OS=Homo sapiens OX=9606 GN=CTSB PE=1 SV=3	IC(BTD[C])EPGYSPTYK|	NA	NA	NA	0.63	NA	NA	NA	NA	NA	NA	NA	1.26	1.37	NA	NA	0.85	0.92	0.9	NA	0.79	1	NA	NA	1.07	1.09	NA	NA	NA	NA	NA	NA	NA	NA	NA	NA	NA	NA	0.56	NA	NA	NA	NA	NA	0.99	NA
P07900	572	HSP90AA1	HS90A_HUMAN Heat shock protein HSP 90-alpha OS=Homo sapiens OX=9606 GN=HSP90AA1 PE=1 SV=5	TKFENLC(BTD[C])K|TKFENLC(BTD[C])K	0.91	1.92	0.93	NA	0.82	1.72	1.12	1.11	1.87	0.5	0.47	1.31	0.93	NA	NA	1.34	0.54	1.18	0.56	0.46	1.28	1.85	1.15	0.89	0.9	1.22	3.32	NA	1	0.13	0.12	NA	NA	NA	NA	0.09	0.33	NA	NA	NA	NA	1.61	NA	NA	NA
P07900	420	HSP90AA1	HS90A_HUMAN Heat shock protein HSP 90-alpha OS=Homo sapiens OX=9606 GN=HSP90AA1 PE=1 SV=5	|KC(BTD[C])LELFTELAEDKENYK	NA	3.18	NA	NA	NA	NA	NA	NA	1.29	NA	NA	1.57	NA	NA	NA	NA	0.64	2.34	0.8	NA	NA	1.91	NA	1.02	1.07	2.35	NA	0.16	NA	0.21	0.18	NA	NA	NA	NA	0.17	0.86	NA	NA	0.41	NA	NA	1.03	0.69	0.42
P07900	481	HSP90AA1	HS90A_HUMAN Heat shock protein HSP 90-alpha OS=Homo sapiens OX=9606 GN=HSP90AA1 PE=1 SV=5	YYTSASGDEMVSLKDYC(BTD[C])TR|	NA	NA	NA	NA	NA	NA	NA	NA	NA	NA	NA	NA	NA	NA	NA	NA	NA	NA	NA	NA	NA	NA	NA	NA	NA	NA	NA	NA	NA	NA	0.07	NA	NA	NA	NA	0.05	NA	NA	NA	NA	1.67	NA	NA	NA	NA
P07910	46	HNRNPC	HNRPC_HUMAN Heterogeneous nuclear ribonucleoproteins C1/C2 OS=Homo sapiens OX=9606 GN=HNRNPC PE=1 SV=4	IVGC(BTD[C])SVHK|IVGC(BTD[C])SVHK	0.37	1.84	0.86	0.38	0.42	1.18	0.56	0.55	0.99	0.45	0.88	0.97	0.64	1.26	1.49	0.92	0.45	0.81	0.72	0.36	0.58	1.88	0.61	0.68	0.64	0.66	1.83	1.99	2.39	NA	NA	2.03	0.9	1.16	NA	0.12	0.81	0.45	1.07	0.45	0.37	0.47	0.5	0.76	0.55
P07919	81	UQCRH	QCR6_HUMAN Cytochrome b-c1 complex subunit 6, mitochondrial OS=Homo sapiens OX=9606 GN=UQCRH PE=1 SV=2	DHC(BTD[C])VAHK|	NA	NA	0.77	0.77	NA	NA	NA	NA	0.94	0.85	0.81	0.91	2.49	0.65	1.23	1.22	NA	0.68	0.99	0.79	NA	2.97	NA	NA	1	0.8	0.81	2.25	NA	NA	NA	NA	NA	0.85	0.89	NA	0.28	0.31	NA	0.39	0.34	0.73	NA	0.57	NA
P07919	43	UQCRH	QCR6_HUMAN Cytochrome b-c1 complex subunit 6, mitochondrial OS=Homo sapiens OX=9606 GN=UQCRH PE=1 SV=2	EQCEQLEKC(BTD[C])VK|EQCEQLEKC(BTD[C])VK	NA	NA	NA	0.82	NA	NA	NA	NA	NA	NA	0.98	NA	0.98	0.66	1.31	NA	NA	NA	0.9	0.7	NA	NA	NA	NA	NA	0.56	NA	1.18	NA	NA	NA	1.38	1.35	0.76	1.18	NA	0.85	0.4	0.82	0.45	NA	0.52	0.91	0.58	0.56
P07919	53	UQCRH	QCR6_HUMAN Cytochrome b-c1 complex subunit 6, mitochondrial OS=Homo sapiens OX=9606 GN=UQCRH PE=1 SV=2	|LELC(BTD[C])DER	NA	NA	NA	NA	NA	NA	NA	NA	NA	NA	1.02	NA	1.01	0.52	NA	NA	NA	NA	1.05	NA	NA	NA	NA	NA	NA	NA	NA	5.47	NA	NA	NA	1.33	1.34	0.77	0.75	NA	0.98	0.69	NA	0.92	0.57	0.56	NA	1.02	0.71
P07919	37	UQCRH	QCR6_HUMAN Cytochrome b-c1 complex subunit 6, mitochondrial OS=Homo sapiens OX=9606 GN=UQCRH PE=1 SV=2	EQC(BTD[C])EQLEK|EQC(BTD[C])EQLEK	NA	NA	NA	0.43	NA	NA	NA	NA	NA	NA	0.97	0.96	NA	NA	NA	1	1.29	NA	0.94	0.45	0.59	NA	NA	0.74	0.67	NA	NA	1.25	NA	NA	NA	NA	NA	NA	NA	NA	NA	NA	NA	NA	NA	NA	NA	0.81	0.48
P07942	755	LAMB1	LAMB1_HUMAN Laminin subunit beta-1 OS=Homo sapiens OX=9606 GN=LAMB1 PE=1 SV=2	TPMTDVC(BTD[C])R|	NA	NA	NA	NA	NA	1.19	NA	NA	NA	NA	NA	0.92	NA	NA	NA	0.4	0.86	0.98	NA	NA	1.46	NA	NA	0.83	NA	NA	NA	NA	NA	NA	NA	NA	NA	NA	NA	NA	NA	NA	NA	NA	NA	NA	NA	NA	NA
P07942	671	LAMB1	LAMB1_HUMAN Laminin subunit beta-1 OS=Homo sapiens OX=9606 GN=LAMB1 PE=1 SV=2	PVC(BTD[C])FEK|	NA	NA	0.66	NA	NA	NA	NA	NA	NA	NA	NA	1.26	NA	NA	NA	0.95	0.73	0.98	NA	NA	NA	1.36	NA	NA	NA	0.65	NA	NA	NA	NA	NA	NA	NA	NA	NA	NA	NA	NA	NA	NA	NA	NA	NA	NA	NA
P07942	332	LAMB1	LAMB1_HUMAN Laminin subunit beta-1 OS=Homo sapiens OX=9606 GN=LAMB1 PE=1 SV=2	NSNAC(BTD[C])K|	NA	NA	NA	NA	NA	NA	NA	NA	NA	NA	NA	1.6	NA	NA	NA	0.99	0.74	NA	NA	NA	1.61	NA	NA	NA	NA	NA	NA	NA	NA	NA	NA	NA	NA	NA	NA	NA	NA	NA	NA	NA	NA	NA	NA	NA	NA
P07947	255	YES1	YES_HUMAN Tyrosine-protein kinase Yes OS=Homo sapiens OX=9606 GN=YES1 PE=1 SV=3	LTTVC(BTD[C])PTVKPQTQGLAK|	NA	2.94	0.76	NA	NA	1.03	0.73	0.56	NA	0.44	NA	0.88	NA	0.98	1.22	0.83	0.67	0.77	0.71	NA	NA	NA	0.46	NA	0.62	0.8	NA	NA	NA	NA	NA	2.01	1.18	0.83	0.94	NA	0.88	0.74	0.95	NA	0.57	0.65	NA	NA	0.65
P07947	410	YES1	YES_HUMAN Tyrosine-protein kinase Yes OS=Homo sapiens OX=9606 GN=YES1 PE=1 SV=3	AANILVGENLVC(BTD[C])K|	NA	0.85	NA	NA	NA	NA	NA	NA	NA	NA	NA	NA	NA	NA	NA	NA	NA	NA	NA	NA	NA	NA	NA	NA	NA	NA	NA	NA	NA	NA	NA	NA	NA	NA	NA	NA	NA	NA	NA	NA	0.9	NA	NA	NA	NA
P07948	226	LYN	LYN_HUMAN Tyrosine-protein kinase Lyn OS=Homo sapiens OX=9606 GN=LYN PE=1 SV=3	AC(BTD[C])ISPK|	NA	NA	NA	NA	NA	NA	NA	NA	NA	NA	NA	0.65	NA	NA	NA	NA	0.54	NA	NA	NA	0.57	NA	NA	NA	NA	NA	NA	NA	NA	NA	NA	NA	NA	NA	NA	NA	NA	1.41	NA	NA	NA	NA	NA	NA	NA
P07948	219	LYN	LYN_HUMAN Tyrosine-protein kinase Lyn OS=Homo sapiens OX=9606 GN=LYN PE=1 SV=3	|QADGLC(BTD[C])R	NA	NA	NA	NA	NA	NA	NA	NA	NA	NA	NA	NA	NA	NA	NA	NA	0.9	NA	NA	NA	NA	NA	NA	NA	NA	1.05	NA	NA	NA	NA	NA	NA	NA	NA	NA	NA	NA	NA	NA	NA	NA	NA	NA	NA	NA
P08069	251	IGF1R	IGF1R_HUMAN Insulin-like growth factor 1 receptor OS=Homo sapiens OX=9606 GN=IGF1R PE=1 SV=1	ACVAC(BTD[C])R|	NA	1.61	NA	NA	NA	NA	NA	NA	NA	NA	NA	NA	NA	NA	NA	NA	NA	NA	NA	NA	NA	4.88	NA	NA	NA	NA	NA	NA	NA	NA	NA	NA	NA	NA	NA	NA	NA	NA	NA	NA	NA	NA	NA	NA	NA
P08133	59	ANXA6	ANXA6_HUMAN Annexin A6 OS=Homo sapiens OX=9606 GN=ANXA6 PE=1 SV=3	QEVC(BTD[C])QSYK|	0.38	2.29	0.53	0.37	0.37	1.1	0.9	0.52	0.98	0.73	0.82	0.87	0.93	0.77	1.2	0.76	NA	0.84	0.69	0.49	0.93	1.93	0.49	0.71	0.88	0.92	1.43	6.39	4.19	NA	0.32	2.36	1.11	0.87	1.15	0.48	NA	0.53	0.65	0.41	0.37	0.56	0.55	0.69	0.46
P08133	552	ANXA6	ANXA6_HUMAN Annexin A6 OS=Homo sapiens OX=9606 GN=ANXA6 PE=1 SV=3	FMTILC(BTD[C])TR|	0.22	0.86	0.89	0.4	0.59	1.07	0.98	0.65	1.15	0.64	0.6	1.06	0.58	0.62	NA	0.8	0.5	1.07	0.55	0.53	0.94	0.79	NA	0.93	0.66	0.95	NA	NA	0.26	NA	NA	NA	NA	NA	NA	NA	0.98	0.33	0.22	NA	0.71	0.3	NA	0.6	NA
P08133	96	ANXA6	ANXA6_HUMAN Annexin A6 OS=Homo sapiens OX=9606 GN=ANXA6 PE=1 SV=3	LIVGLMRPPAYC(BTD[C])DAK|	NA	NA	NA	NA	NA	NA	NA	0.58	NA	NA	0.41	NA	NA	NA	NA	NA	0.92	NA	NA	NA	NA	NA	NA	NA	NA	NA	NA	NA	NA	NA	NA	NA	NA	NA	1.5	NA	0.94	NA	NA	NA	0.2	NA	0.43	NA	0.41
P08133	248	ANXA6	ANXA6_HUMAN Annexin A6 OS=Homo sapiens OX=9606 GN=ANXA6 PE=1 SV=3	LMLAVVKC(BTD[C])IR|	NA	NA	NA	NA	NA	NA	NA	NA	NA	NA	NA	NA	NA	NA	NA	NA	NA	NA	NA	NA	NA	NA	NA	NA	NA	NA	NA	NA	NA	NA	NA	NA	NA	NA	NA	0.08	NA	NA	NA	NA	NA	NA	NA	NA	NA
P08134	159	RHOC	RHOC_HUMAN Rho-related GTP-binding protein RhoC OS=Homo sapiens OX=9606 GN=RHOC PE=1 SV=1	ISAFGYLEC(BTD[C])SAK|	NA	NA	1.14	0.97	NA	NA	NA	NA	NA	NA	NA	NA	NA	NA	NA	NA	NA	NA	NA	NA	1.23	NA	NA	1.27	NA	NA	NA	NA	NA	NA	NA	NA	NA	NA	NA	NA	NA	NA	NA	NA	NA	NA	NA	NA	NA
P08134	16	RHOC	RHOC_HUMAN Rho-related GTP-binding protein RhoC OS=Homo sapiens OX=9606 GN=RHOC PE=1 SV=1	IVGDGAC(BTD[C])GK LVIVGDGAC(BTD[C])GK|	NA	NA	NA	NA	NA	NA	NA	NA	NA	NA	NA	NA	NA	NA	NA	NA	NA	NA	NA	NA	NA	NA	NA	NA	NA	NA	NA	NA	NA	NA	NA	NA	NA	NA	NA	NA	NA	NA	NA	NA	NA	NA	1.17	NA	1.29
P08174	145	CD55	DAF_HUMAN Complement decay-accelerating factor OS=Homo sapiens OX=9606 GN=CD55 PE=1 SV=4	LTC(BTD[C])LQNLK|	NA	2.5	NA	NA	NA	NA	NA	NA	1.72	NA	NA	NA	NA	NA	NA	NA	NA	NA	NA	0.51	1.26	NA	NA	0.86	NA	0.89	NA	NA	0.58	NA	NA	NA	NA	NA	NA	NA	NA	NA	NA	NA	NA	NA	NA	NA	NA
P08174	98	CD55	DAF_HUMAN Complement decay-accelerating factor OS=Homo sapiens OX=9606 GN=CD55 PE=1 SV=4	|SC(BTD[C])EVPTR	NA	NA	NA	NA	NA	NA	NA	NA	0.99	NA	NA	1.02	NA	NA	NA	NA	0.45	NA	0.96	0.55	NA	NA	NA	0.57	0.84	NA	0.88	1.08	NA	NA	NA	NA	NA	NA	NA	NA	NA	1.16	NA	NA	NA	NA	NA	NA	0.98
P08174	81	CD55	DAF_HUMAN Complement decay-accelerating factor OS=Homo sapiens OX=9606 GN=CD55 PE=1 SV=4	DSVIC(BTD[C])LK|	NA	1.38	NA	NA	NA	NA	NA	NA	NA	NA	NA	NA	NA	NA	NA	0.93	NA	NA	NA	NA	NA	NA	NA	0.68	NA	0.76	NA	NA	NA	NA	NA	NA	NA	NA	NA	NA	NA	NA	NA	NA	NA	NA	NA	NA	NA
P08174	253	CD55	DAF_HUMAN Complement decay-accelerating factor OS=Homo sapiens OX=9606 GN=CD55 PE=1 SV=4	|QSVTYAC(BTD[C])NK	NA	NA	NA	NA	NA	NA	NA	NA	NA	NA	NA	NA	NA	NA	NA	NA	NA	NA	NA	NA	NA	NA	NA	NA	NA	0.59	NA	NA	NA	NA	NA	NA	NA	NA	NA	NA	NA	NA	NA	NA	NA	NA	NA	NA	NA
P08195	431	SLC3A2	4F2_HUMAN 4F2 cell-surface antigen heavy chain OS=Homo sapiens OX=9606 GN=SLC3A2 PE=1 SV=3	WC(BTD[C])SWSLSQAR|	NA	NA	0.97	NA	NA	NA	NA	NA	NA	NA	NA	NA	NA	NA	NA	NA	0.76	NA	NA	NA	0.53	NA	NA	0.78	0.98	0.7	NA	NA	NA	NA	NA	NA	NA	NA	NA	NA	NA	NA	NA	NA	NA	NA	NA	NA	NA
P08237	351	PFKM	PFKAM_HUMAN ATP-dependent 6-phosphofructokinase, muscle type OS=Homo sapiens OX=9606 GN=PFKM PE=1 SV=2	LPLMEC(BTD[C])VQVTK|	NA	NA	NA	NA	NA	NA	NA	1.02	NA	NA	NA	0.99	1.42	NA	NA	NA	NA	NA	NA	NA	NA	NA	NA	0.91	NA	0.63	NA	NA	NA	NA	NA	NA	NA	NA	NA	NA	NA	NA	NA	NA	NA	NA	NA	NA	NA
P08237	709	PFKM	PFKAM_HUMAN ATP-dependent 6-phosphofructokinase, muscle type OS=Homo sapiens OX=9606 GN=PFKM PE=1 SV=2	|IFANTPDSGC(BTD[C])VLGMR	NA	NA	NA	NA	NA	NA	NA	NA	NA	NA	NA	NA	NA	NA	NA	1.1	NA	NA	NA	NA	NA	NA	NA	NA	NA	NA	NA	NA	NA	NA	NA	NA	NA	NA	NA	NA	NA	NA	NA	NA	NA	NA	NA	NA	NA
P08238	564	HSP90AB1	HS90B_HUMAN Heat shock protein HSP 90-beta OS=Homo sapiens OX=9606 GN=HSP90AB1 PE=1 SV=4	AKFENLC(BTD[C])K|	1.03	NA	NA	NA	0.47	2.48	1.44	0.94	2.15	NA	NA	NA	NA	NA	NA	NA	0.68	1.04	NA	NA	NA	NA	0.98	1.08	NA	0.88	NA	NA	NA	0.08	0.1	NA	NA	NA	NA	0.08	NA	NA	NA	NA	NA	NA	NA	NA	NA
P08238	412	HSP90AB1	HS90B_HUMAN Heat shock protein HSP 90-beta OS=Homo sapiens OX=9606 GN=HSP90AB1 PE=1 SV=4	KC(BTD[C])LELFSELAEDK|KC(BTD[C])LELFSELAEDKENYK	NA	NA	NA	NA	NA	NA	NA	NA	NA	NA	NA	NA	NA	NA	NA	1.44	0.88	NA	NA	NA	1.27	NA	NA	1.34	1.8	NA	NA	1.64	NA	0.16	0.22	NA	NA	NA	NA	0.21	NA	NA	NA	0.57	NA	NA	NA	NA	0.28
P08240	253	SRPRA	SRPRA_HUMAN Signal recognition particle receptor subunit alpha OS=Homo sapiens OX=9606 GN=SRPRA PE=1 SV=2	VWELGGC(BTD[C])ANK|	NA	NA	NA	NA	1.13	NA	NA	NA	NA	NA	NA	NA	NA	NA	NA	NA	NA	NA	NA	NA	NA	NA	NA	NA	NA	NA	NA	NA	NA	NA	NA	NA	1.36	NA	NA	NA	NA	1.01	NA	NA	NA	NA	NA	0.96	NA
P08243	158	ASNS	ASNS_HUMAN Asparagine synthetase [glutamine-hydrolyzing] OS=Homo sapiens OX=9606 GN=ASNS PE=1 SV=4	AMTEDGFLAVC(BTD[C])SEAK|	NA	NA	NA	NA	NA	NA	NA	NA	NA	NA	NA	NA	NA	NA	NA	NA	NA	NA	NA	NA	NA	NA	NA	NA	NA	NA	NA	NA	NA	NA	NA	NA	NA	NA	NA	NA	NA	NA	NA	NA	NA	NA	NA	NA	NA
P08247	190	SYP	SYPH_HUMAN Synaptophysin OS=Homo sapiens OX=9606 GN=SYP PE=1 SV=3	|QTGNTC(BTD[C])K	NA	NA	NA	NA	NA	NA	NA	NA	NA	NA	NA	0.66	NA	NA	NA	NA	NA	NA	NA	NA	NA	NA	NA	NA	NA	NA	NA	NA	NA	NA	NA	NA	NA	NA	NA	NA	NA	NA	NA	NA	NA	NA	NA	NA	NA
P08559	41	PDHA1	ODPA_HUMAN Pyruvate dehydrogenase E1 component subunit alpha, somatic form, mitochondrial OS=Homo sapiens OX=9606 GN=PDHA1 PE=1 SV=3	KC(BTD[C])DLHR|	0.42	2.16	0.85	0.98	0.31	1.04	0.52	0.45	1.04	0.76	1.23	1	1.07	1.39	1.37	0.94	0.83	0.97	0.77	0.76	1.09	1.62	0.58	1.02	0.93	1.15	1.57	1.05	NA	1.29	0.84	NA	NA	0.76	1.14	0.6	0.98	0.7	NA	0.74	0.62	0.82	1.18	1.09	NA
P08559	273	PDHA1	ODPA_HUMAN Pyruvate dehydrogenase E1 component subunit alpha, somatic form, mitochondrial OS=Homo sapiens OX=9606 GN=PDHA1 PE=1 SV=3	FAAAYC(BTD[C])R|FAAAYC(BTD[C])R	0.81	1.87	1.08	0.56	0.63	1.15	1.07	0.82	1.19	NA	0.74	1.11	0.89	NA	NA	NA	0.87	1.27	0.99	NA	1.06	1.84	0.88	1.19	0.95	1.07	1.8	NA	NA	NA	NA	NA	NA	NA	NA	NA	NA	NA	NA	NA	NA	NA	NA	NA	NA
P08559	261	PDHA1	ODPA_HUMAN Pyruvate dehydrogenase E1 component subunit alpha, somatic form, mitochondrial OS=Homo sapiens OX=9606 GN=PDHA1 PE=1 SV=3	VDGMDILC(BTD[C])VR|VDGMDILC(BTD[C])VR	NA	NA	NA	NA	NA	NA	NA	NA	NA	NA	NA	1.12	NA	NA	NA	1.33	0.93	NA	NA	NA	0.93	NA	NA	1.05	1.06	NA	NA	1.01	NA	NA	NA	NA	NA	NA	NA	NA	NA	NA	NA	NA	NA	NA	NA	0.72	NA
P08559	222	PDHA1	ODPA_HUMAN Pyruvate dehydrogenase E1 component subunit alpha, somatic form, mitochondrial OS=Homo sapiens OX=9606 GN=PDHA1 PE=1 SV=3	LPCIFIC(BTD[C])ENNR|	NA	NA	NA	NA	NA	NA	NA	NA	NA	NA	NA	NA	NA	NA	NA	NA	NA	NA	NA	NA	NA	NA	NA	NA	NA	NA	NA	NA	NA	NA	NA	NA	NA	NA	NA	NA	NA	NA	NA	NA	NA	1.06	NA	NA	NA
P08572	1665	COL4A2	CO4A2_HUMAN Collagen alpha-2(IV) chain OS=Homo sapiens OX=9606 GN=COL4A2 PE=1 SV=4	|GTC(BTD[C])HYYANK	NA	NA	NA	NA	NA	NA	NA	NA	NA	NA	1.42	1.77	NA	NA	NA	NA	NA	NA	NA	NA	NA	NA	NA	NA	1.04	0.88	NA	NA	NA	NA	NA	NA	NA	NA	NA	NA	NA	NA	NA	NA	NA	NA	NA	NA	NA
P08572	1537	COL4A2	CO4A2_HUMAN Collagen alpha-2(IV) chain OS=Homo sapiens OX=9606 GN=COL4A2 PE=1 SV=4	AHNQDLGLAGSC(BTD[C])LAR|	NA	1.28	NA	NA	NA	NA	NA	NA	NA	NA	NA	NA	NA	NA	NA	NA	NA	NA	NA	NA	NA	NA	NA	NA	NA	NA	NA	NA	NA	NA	NA	NA	NA	NA	NA	NA	NA	NA	NA	NA	NA	NA	NA	NA	NA
P08572	1658	COL4A2	CO4A2_HUMAN Collagen alpha-2(IV) chain OS=Homo sapiens OX=9606 GN=COL4A2 PE=1 SV=4	ATPFIEC(BTD[C])NGGR|	NA	NA	NA	NA	NA	NA	NA	NA	NA	NA	NA	NA	NA	NA	NA	NA	NA	NA	NA	NA	NA	NA	NA	NA	NA	NA	NA	NA	NA	NA	NA	NA	NA	NA	NA	NA	NA	NA	NA	NA	NA	NA	NA	NA	NA
P08574	139	CYC1	CY1_HUMAN Cytochrome c1, heme protein, mitochondrial OS=Homo sapiens OX=9606 GN=CYC1 PE=1 SV=3	HLVGVC(BTD[C])YTEDEAK|	NA	1.5	0.96	NA	NA	NA	0.99	NA	NA	NA	NA	1.63	0.89	NA	NA	1.2	0.71	1.41	0.98	NA	NA	NA	0.64	1.06	0.76	1.21	NA	NA	NA	NA	NA	1.47	NA	1.02	1.18	NA	1.03	0.83	NA	NA	0.42	0.97	1.04	1.09	0.58
P08574	271	CYC1	CY1_HUMAN Cytochrome c1, heme protein, mitochondrial OS=Homo sapiens OX=9606 GN=CYC1 PE=1 SV=3	DVC(BTD[C])TFLR|	NA	NA	NA	NA	0.57	NA	0.65	0.76	NA	NA	NA	0.99	NA	0.94	1.02	NA	NA	NA	NA	NA	0.96	NA	0.76	0.98	1	NA	NA	1	NA	NA	NA	NA	NA	NA	NA	NA	NA	NA	0.98	0.58	0.6	0.63	0.52	0.83	NA
P08581	1107	MET	MET_HUMAN Hepatocyte growth factor receptor OS=Homo sapiens OX=9606 GN=MET PE=1 SV=4	IHC(BTD[C])AVK|	NA	NA	0.88	NA	NA	NA	NA	NA	NA	NA	NA	NA	NA	NA	NA	1.1	NA	NA	NA	NA	NA	NA	NA	0.97	NA	1.02	NA	NA	NA	NA	NA	NA	NA	NA	NA	NA	NA	NA	NA	NA	NA	NA	NA	NA	NA
P08582	397	MELTF	TRFM_HUMAN Melanotransferrin OS=Homo sapiens OX=9606 GN=MELTF PE=1 SV=2	LKPEIQC(BTD[C])VSAK|	NA	NA	NA	NA	NA	NA	NA	NA	1.38	NA	NA	NA	NA	NA	NA	NA	NA	NA	NA	NA	NA	NA	NA	NA	NA	NA	NA	NA	NA	NA	NA	NA	NA	NA	NA	NA	NA	NA	NA	NA	NA	NA	NA	NA	NA
P08588	414	ADRB1	ADRB1_HUMAN Beta-1 adrenergic receptor OS=Homo sapiens OX=9606 GN=ADRB1 PE=1 SV=2	ASGC(BTD[C])LAR|	NA	3.12	NA	NA	NA	NA	NA	NA	NA	NA	NA	NA	NA	NA	NA	NA	NA	NA	NA	NA	NA	NA	NA	NA	NA	NA	NA	NA	NA	NA	NA	NA	NA	NA	NA	NA	NA	NA	NA	NA	NA	NA	NA	NA	NA
P08621	39	SNRNP70	RU17_HUMAN U1 small nuclear ribonucleoprotein 70 kDa OS=Homo sapiens OX=9606 GN=SNRNP70 PE=1 SV=2	NQPYC(BTD[C])GIAPYIR|	NA	NA	NA	NA	NA	NA	NA	NA	NA	NA	NA	NA	NA	NA	NA	NA	NA	NA	NA	NA	NA	NA	NA	NA	NA	NA	NA	NA	NA	NA	NA	NA	NA	NA	NA	NA	NA	NA	NA	NA	0.73	NA	NA	NA	NA
P08648	192	ITGA5	ITA5_HUMAN Integrin alpha-5 OS=Homo sapiens OX=9606 GN=ITGA5 PE=1 SV=2	ILEYAPC(BTD[C])R|	NA	NA	NA	NA	NA	1.42	NA	NA	NA	NA	NA	NA	NA	NA	NA	NA	0.99	NA	NA	NA	1.32	1.06	NA	NA	1.11	NA	NA	NA	NA	NA	NA	NA	NA	NA	NA	NA	NA	NA	NA	NA	NA	NA	NA	NA	NA
P08651	88	NFIC	NFIC_HUMAN Nuclear factor 1 C-type OS=Homo sapiens OX=9606 GN=NFIC PE=1 SV=2	DIRPEC(BTD[C])R|	0.69	3.11	0.68	NA	NA	1.14	0.53	NA	0.87	0.91	NA	0.75	NA	0.94	1.23	0.95	NA	0.85	NA	NA	1.06	2.11	NA	1	0.84	0.96	1.01	13.29	NA	NA	0.73	1.37	1.1	0.77	1.42	1.14	0.78	NA	1.04	1.03	0.65	NA	NA	0.94	0.71
P08651	104	NFIC	NFIC_HUMAN Nuclear factor 1 C-type OS=Homo sapiens OX=9606 GN=NFIC PE=1 SV=2	KAPGC(BTD[C])VLSNPDQK|KAPGC(BTD[C])VLSNPDQK	NA	NA	0.66	NA	0.5	1.11	NA	0.51	0.96	NA	0.52	NA	0.61	NA	1.54	NA	NA	0.78	NA	NA	0.77	NA	1.03	0.62	0.56	0.94	1.46	NA	NA	NA	NA	NA	NA	NA	NA	NA	NA	NA	NA	0.54	NA	0.32	0.59	0.47	1.38
P08670	328	VIM	VIME_HUMAN Vimentin OS=Homo sapiens OX=9606 GN=VIM PE=1 SV=4	QVQSLTC(BTD[C])EVDALK|QVQSLTC(BTD[C])EVDALK	0.4	3.33	NA	0.44	0.42	1.3	0.58	0.45	1.54	0.37	0.94	0.99	0.55	0.99	1.23	0.95	0.85	1.1	0.62	0.43	0.95	3.14	0.63	0.96	0.94	0.98	1.71	8.57	2.71	0.89	1	1.81	1.28	0.93	1.39	0.67	0.84	0.62	1.02	0.71	0.58	0.65	1.05	0.78	0.63
P08708	35	RPS17	RS17_HUMAN 40S ribosomal protein S17 OS=Homo sapiens OX=9606 GN=RPS17 PE=1 SV=2	RVC(BTD[C])EEIAIIPSKK VC(BTD[C])EEIAIIPSKK RVC(BTD[C])EEIAIIPSK VC(BTD[C])EEIAIIPSK|VC(BTD[C])EEIAIIPSK	NA	NA	0.91	0.28	0.57	1.36	0.81	0.79	1.07	0.58	0.81	1	0.6	0.74	1.1	1.17	0.67	1.03	0.66	0.37	1.05	2	1.21	0.84	0.81	1.02	1.65	6.22	1.6	NA	NA	1.52	NA	0.94	1.03	NA	0.85	NA	NA	0.61	0.64	NA	0.86	0.8	0.58
P08754	325	GNAI3	GNAI3_HUMAN Guanine nucleotide-binding protein G(i) subunit alpha OS=Homo sapiens OX=9606 GN=GNAI3 PE=1 SV=3	EIYTHFTC(BTD[C])ATDTK|	0.96	NA	NA	NA	NA	1.28	NA	NA	NA	NA	NA	1.3	1.15	NA	NA	NA	NA	NA	NA	NA	NA	NA	NA	NA	NA	NA	NA	NA	NA	NA	NA	NA	NA	NA	NA	NA	NA	NA	NA	NA	NA	NA	NA	NA	NA
P08754	254	GNAI3	GNAI3_HUMAN Guanine nucleotide-binding protein G(i) subunit alpha OS=Homo sapiens OX=9606 GN=GNAI3 PE=1 SV=3	LFDSIC(BTD[C])NNK|	NA	NA	NA	NA	NA	NA	NA	NA	NA	NA	NA	0.95	NA	NA	NA	NA	NA	NA	NA	NA	NA	NA	NA	NA	NA	NA	NA	NA	NA	NA	NA	NA	NA	NA	NA	NA	NA	NA	NA	NA	NA	NA	NA	NA	NA
P08754	66	GNAI3	GNAI3_HUMAN Guanine nucleotide-binding protein G(i) subunit alpha OS=Homo sapiens OX=9606 GN=GNAI3 PE=1 SV=3	IIHEDGYSEDEC(BTD[C])K|	0.6	NA	NA	0.6	0.9	NA	NA	0.98	NA	NA	NA	NA	0.99	NA	NA	NA	1.23	NA	NA	NA	1.94	NA	0.82	NA	2.06	NA	NA	NA	NA	NA	NA	NA	NA	NA	NA	NA	NA	0.95	NA	NA	0.99	1.02	NA	1.04	0.9
P08754	139	GNAI3	GNAI3_HUMAN Guanine nucleotide-binding protein G(i) subunit alpha OS=Homo sapiens OX=9606 GN=GNAI3 PE=1 SV=3	|DGGVQAC(BTD[C])FSR	NA	2.5	0.78	NA	NA	1.08	NA	NA	NA	NA	NA	0.91	NA	NA	1.32	0.96	NA	0.86	NA	NA	0.8	NA	0.63	0.96	0.87	NA	1.21	NA	NA	NA	NA	NA	0.96	0.97	NA	NA	NA	NA	0.93	NA	NA	NA	NA	0.7	0.63
P08865	163	RPSA	RSSA_HUMAN 40S ribosomal protein SA OS=Homo sapiens OX=9606 GN=RPSA PE=1 SV=4	YVDIAIPC(BTD[C])NNK|YVDIAIPC(BTD[C])NNK	0.39	2.94	NA	0.5	0.44	1.17	0.62	0.53	NA	0.66	NA	1.01	0.73	NA	NA	0.92	0.72	0.99	NA	0.79	0.91	2.21	0.59	0.86	0.7	1.03	1.49	3.69	NA	NA	NA	1.68	NA	1.04	NA	NA	0.89	1.1	1.03	0.82	0.8	0.9	1.23	0.97	0.76
P08865	148	RPSA	RSSA_HUMAN 40S ribosomal protein SA OS=Homo sapiens OX=9606 GN=RPSA PE=1 SV=4	ADHQPLTEASYVNLPTIALC(BTD[C])NTDSPLR|	NA	NA	NA	NA	NA	NA	NA	NA	NA	NA	NA	NA	NA	NA	NA	NA	NA	NA	NA	NA	NA	NA	NA	0.69	NA	NA	NA	NA	NA	NA	NA	NA	NA	NA	NA	NA	NA	NA	NA	NA	0.43	NA	NA	0.8	0.64
P09038	211	FGF2	FGF2_HUMAN Fibroblast growth factor 2 OS=Homo sapiens OX=9606 GN=FGF2 PE=1 SV=3	GVC(BTD[C])ANR|	NA	NA	NA	NA	NA	NA	NA	NA	NA	NA	NA	NA	NA	NA	NA	NA	NA	NA	NA	NA	0.38	NA	NA	NA	0.81	0.46	NA	NA	NA	NA	NA	NA	NA	NA	NA	NA	NA	NA	NA	NA	NA	NA	NA	NA	NA
P09104	357	ENO2	ENOG_HUMAN Gamma-enolase OS=Homo sapiens OX=9606 GN=ENO2 PE=1 SV=3	VNQIGSVTEAIQAC(BTD[C])K|	NA	NA	NA	0.41	NA	NA	NA	0.93	NA	NA	NA	NA	1.94	NA	NA	NA	0.72	NA	0.52	NA	0.79	NA	NA	0.7	0.68	NA	NA	NA	NA	NA	NA	NA	NA	NA	NA	NA	NA	NA	NA	NA	NA	NA	NA	NA	NA
P09110	381	ACAA1	THIK_HUMAN 3-ketoacyl-CoA thiolase, peroxisomal OS=Homo sapiens OX=9606 GN=ACAA1 PE=1 SV=2	|VNPLGGAVALGHPLGC(BTD[C])TGAR	0.38	2.62	NA	0.79	NA	0.99	0.54	0.59	1.02	NA	0.88	0.82	NA	1.17	1.38	NA	0.69	0.91	1.46	0.63	NA	1.75	0.46	0.97	0.78	0.87	NA	0.67	NA	0.62	0.83	2.47	1.5	1.06	1.61	0.26	1.1	0.58	1	NA	0.49	0.81	0.94	NA	0.57
P09110	218	ACAA1	THIK_HUMAN 3-ketoacyl-CoA thiolase, peroxisomal OS=Homo sapiens OX=9606 GN=ACAA1 PE=1 SV=2	GC(BTD[C])FQAEIVPVTTTVHDDK|	NA	1.64	NA	NA	NA	NA	NA	NA	NA	NA	NA	NA	NA	NA	NA	NA	1.21	NA	NA	NA	NA	NA	NA	NA	NA	NA	NA	NA	NA	NA	NA	NA	NA	NA	NA	NA	NA	NA	NA	NA	NA	NA	NA	NA	NA
P09110	123	ACAA1	THIK_HUMAN 3-ketoacyl-CoA thiolase, peroxisomal OS=Homo sapiens OX=9606 GN=ACAA1 PE=1 SV=2	QC(BTD[C])SSGLQAVASIAGGIR|QC(BTD[C])SSGLQAVASIAGGIR	NA	NA	NA	NA	NA	NA	NA	NA	NA	NA	NA	NA	NA	NA	NA	NA	NA	NA	NA	NA	NA	NA	NA	NA	NA	NA	NA	NA	NA	NA	NA	NA	NA	NA	NA	NA	NA	NA	NA	0.91	NA	NA	NA	NA	NA
P09110	177	ACAA1	THIK_HUMAN 3-ketoacyl-CoA thiolase, peroxisomal OS=Homo sapiens OX=9606 GN=ACAA1 PE=1 SV=2	ARDC(BTD[C])LIPMGITSENVAER|	NA	NA	NA	NA	NA	NA	NA	NA	NA	NA	NA	NA	NA	NA	NA	NA	NA	NA	NA	NA	NA	NA	NA	NA	NA	NA	NA	NA	NA	NA	NA	NA	NA	NA	NA	NA	NA	NA	NA	NA	NA	NA	NA	NA	NA
P09211	48	GSTP1	GSTP1_HUMAN Glutathione S-transferase P OS=Homo sapiens OX=9606 GN=GSTP1 PE=1 SV=2	ASC(BTD[C])LYGQLPK|	0.38	NA	0.85	NA	0.45	1.11	0.67	0.52	NA	0.72	NA	0.83	NA	NA	1.44	1.05	0.67	1.09	NA	NA	0.93	1.61	0.54	0.81	0.79	0.89	0.86	NA	1.64	0.14	0.08	1.71	1.1	0.9	1.52	0.13	NA	0.97	0.96	0.54	NA	1.14	0.91	1.1	1
P09211	15	GSTP1	GSTP1_HUMAN Glutathione S-transferase P OS=Homo sapiens OX=9606 GN=GSTP1 PE=1 SV=2	GRC(BTD[C])AALR|GRC(BTD[C])AALR	0.41	2.53	0.73	0.81	0.34	NA	0.59	0.46	1.23	0.58	0.5	1.07	0.59	1.08	NA	1.03	0.77	0.96	0.52	0.46	1.08	1.89	0.53	0.79	0.84	1.01	2.15	NA	2.44	0.81	0.37	2.18	1.45	1.23	3.4	0.47	0.73	0.26	1.54	1.36	NA	0.2	NA	0.53	1.15
P09211	102	GSTP1	GSTP1_HUMAN Glutathione S-transferase P OS=Homo sapiens OX=9606 GN=GSTP1 PE=1 SV=2	DQQEAALVDMVNDGVEDLRC(BTD[C])K|	NA	1.6	NA	0.58	0.67	NA	1.06	0.7	NA	0.51	NA	1.11	NA	NA	1.54	1.28	1.08	NA	NA	NA	1.65	NA	NA	1.09	1.26	0.85	NA	NA	1.28	1.05	1.15	NA	NA	0.94	1.4	0.96	0.83	0.62	NA	NA	0.8	0.96	NA	0.96	0.58
P09234	25	SNRPC	RU1C_HUMAN U1 small nuclear ribonucleoprotein C OS=Homo sapiens OX=9606 GN=SNRPC PE=1 SV=1	KTHC(BTD[C])SGR|	0.37	12.32	1.78	0.78	0.48	3.22	0.47	0.39	2.57	0.54	0.88	NA	1.87	1.06	2.41	1.39	1.44	1.83	NA	0.68	1.1	6.76	0.4	1.39	1.66	2.11	3.47	5.61	3.73	NA	NA	2.01	NA	1.08	2.81	0.36	1.36	0.32	1.53	NA	0.41	0.36	1.62	0.87	0.72
P09341	85	CXCL1	GROA_HUMAN Growth-regulated alpha protein OS=Homo sapiens OX=9606 GN=CXCL1 PE=1 SV=1	|KAC(BTD[C])LNPASPIVK	NA	NA	NA	NA	NA	NA	NA	NA	NA	NA	NA	NA	NA	NA	NA	NA	NA	NA	NA	NA	NA	NA	NA	NA	NA	NA	NA	NA	NA	NA	NA	NA	NA	NA	NA	NA	NA	NA	NA	NA	NA	NA	NA	NA	NA
P09382	61	LGALS1	LEG1_HUMAN Galectin-1 OS=Homo sapiens OX=9606 GN=LGALS1 PE=1 SV=2	FNAHGDANTIVC(BTD[C])NSK|FNAHGDANTIVC(BTD[C])NSK	0.42	2.32	0.87	0.46	0.39	1.19	0.56	0.49	1.17	0.58	0.78	0.94	0.81	0.91	1.5	0.8	0.72	0.92	0.66	0.39	0.82	2.05	0.49	0.74	0.74	0.78	1.28	4.59	2.25	0.63	1.39	2.28	1.16	0.99	1.22	1.49	NA	0.71	0.87	0.43	0.47	0.77	0.62	0.82	0.38
P09382	131	LGALS1	LEG1_HUMAN Galectin-1 OS=Homo sapiens OX=9606 GN=LGALS1 PE=1 SV=2	IKC(BTD[C])VAFD|	0.55	NA	NA	NA	0.57	NA	0.72	0.64	NA	0.45	NA	NA	NA	NA	1.62	NA	0.72	NA	NA	NA	0.87	NA	0.67	NA	NA	NA	NA	NA	1.91	0.44	0.41	NA	1.5	1.26	1.68	0.22	0.82	NA	1.18	0.39	NA	NA	NA	NA	NA
P09382	43	LGALS1	LEG1_HUMAN Galectin-1 OS=Homo sapiens OX=9606 GN=LGALS1 PE=1 SV=2	DSNNLC(BTD[C])LHFNPR|DSNNLC(BTD[C])LHFNPR	0.72	2.2	1	0.55	0.76	1.74	1	0.79	1.22	NA	1	1.16	0.96	1.55	1.77	0.94	0.88	1.05	0.8	0.57	1.03	1.56	1.1	0.92	0.93	1.04	2.73	3.3	0.67	0.42	0.37	1.06	NA	NA	2.62	NA	1.02	0.67	1.37	0.31	0.32	NA	0.62	0.57	NA
P09382	17	LGALS1	LEG1_HUMAN Galectin-1 OS=Homo sapiens OX=9606 GN=LGALS1 PE=1 SV=2	NLKPGEC(BTD[C])LR LKPGEC(BTD[C])LR SNLNLKPGEC(BTD[C])LR VASNLNLKPGEC(BTD[C])LR NLNLKPGEC(BTD[C])LR|NLKPGEC(BTD[C])LR LKPGEC(BTD[C])LR VASNLNLKPGEC(BTD[C])LR NLNLKPGEC(BTD[C])LR	0.34	2.31	0.69	0.41	0.49	0.86	0.58	0.44	0.75	NA	0.81	0.85	0.84	1.07	1.14	0.68	0.69	0.73	0.72	0.44	0.6	1.68	0.47	0.68	0.64	0.67	1.31	3.51	3.15	NA	NA	1.27	1.04	1.02	1.26	NA	0.82	0.76	0.97	0.59	0.58	0.74	0.59	0.68	0.63
P09417	161	QDPR	DHPR_HUMAN Dihydropteridine reductase OS=Homo sapiens OX=9606 GN=QDPR PE=1 SV=2	GAVHQLC(BTD[C])QSLAGK|GAVHQLC(BTD[C])QSLAGK	NA	NA	NA	NA	0.77	1.63	NA	NA	1.85	NA	NA	2.28	NA	NA	NA	1.02	0.98	1.2	NA	NA	NA	2.45	NA	2.08	NA	NA	NA	NA	NA	NA	0.4	NA	NA	NA	NA	NA	NA	NA	NA	NA	NA	NA	NA	NA	NA
P09417	104	QDPR	DHPR_HUMAN Dihydropteridine reductase OS=Homo sapiens OX=9606 GN=QDPR PE=1 SV=2	NC(BTD[C])DLMWK|	NA	NA	NA	0.72	NA	NA	NA	NA	NA	NA	NA	NA	NA	NA	NA	NA	NA	NA	NA	NA	NA	NA	NA	NA	NA	NA	NA	NA	NA	NA	NA	NA	NA	NA	NA	NA	NA	NA	NA	NA	NA	NA	NA	NA	NA
P09429	23	HMGB1	HMGB1_HUMAN High mobility group protein B1 OS=Homo sapiens OX=9606 GN=HMGB1 PE=1 SV=3	AFFVQTC(BTD[C])R|FVQTC(BTD[C])R	NA	NA	0.74	NA	NA	NA	NA	NA	NA	NA	NA	NA	NA	NA	NA	NA	NA	NA	NA	NA	0.73	NA	NA	0.74	NA	NA	NA	NA	3.67	NA	NA	0.7	NA	NA	NA	NA	NA	NA	NA	NA	0.85	NA	NA	NA	NA
P09429	106	HMGB1	HMGB1_HUMAN High mobility group protein B1 OS=Homo sapiens OX=9606 GN=HMGB1 PE=1 SV=3	|RPPSAFFLFC(BTD[C])SEYRPK	NA	NA	NA	NA	NA	NA	NA	NA	NA	NA	NA	NA	NA	NA	NA	NA	NA	NA	NA	NA	NA	NA	NA	NA	NA	NA	NA	NA	NA	NA	NA	NA	NA	NA	NA	NA	NA	NA	NA	NA	NA	NA	1.08	NA	NA
P09471	255	GNAO1	GNAO_HUMAN Guanine nucleotide-binding protein G(o) subunit alpha OS=Homo sapiens OX=9606 GN=GNAO1 PE=1 SV=4	|LFDSIC(BTD[C])NNK	NA	NA	NA	NA	NA	NA	NA	NA	NA	NA	NA	NA	NA	NA	NA	NA	NA	NA	NA	NA	NA	NA	NA	NA	NA	NA	NA	NA	NA	NA	NA	NA	NA	NA	NA	NA	NA	NA	NA	NA	NA	NA	NA	NA	NA
P09471	108	GNAO1	GNAO_HUMAN Guanine nucleotide-binding protein G(o) subunit alpha OS=Homo sapiens OX=9606 GN=GNAO1 PE=1 SV=4	MVC(BTD[C])DVVSR|	NA	NA	NA	NA	NA	NA	NA	NA	NA	NA	NA	NA	NA	NA	NA	NA	0.78	NA	NA	NA	NA	NA	NA	NA	NA	NA	NA	NA	NA	NA	NA	NA	NA	NA	NA	NA	NA	NA	NA	NA	NA	NA	NA	NA	NA
P09488	174	GSTM1	GSTM1_HUMAN Glutathione S-transferase Mu 1 OS=Homo sapiens OX=9606 GN=GSTM1 PE=1 SV=3	|C(BTD[C])LDAFPNLK	NA	NA	NA	NA	NA	NA	NA	NA	NA	NA	NA	NA	NA	NA	NA	NA	NA	NA	NA	NA	NA	NA	NA	NA	NA	NA	NA	NA	NA	NA	NA	NA	NA	NA	NA	NA	NA	NA	NA	0.49	NA	NA	NA	NA	0.32
P09496	218	CLTA	CLCA_HUMAN Clathrin light chain A OS=Homo sapiens OX=9606 GN=CLTA PE=1 SV=1	LC(BTD[C])DFNPK|	0.63	NA	NA	NA	0.74	1.28	NA	NA	1.48	NA	NA	NA	NA	NA	NA	NA	NA	NA	NA	NA	NA	NA	NA	NA	NA	NA	1.24	NA	NA	NA	NA	NA	NA	0.98	0.85	NA	NA	NA	0.59	NA	NA	NA	0.45	NA	0.47
P09497	199	CLTB	CLCB_HUMAN Clathrin light chain B OS=Homo sapiens OX=9606 GN=CLTB PE=1 SV=1	|LC(BTD[C])DFNPK	NA	2.62	1.12	NA	NA	1.1	0.78	0.79	1.29	NA	0.83	1.71	1.15	1.15	1.08	1.01	1.04	0.93	0.88	0.49	0.96	1.75	1.1	0.68	0.98	1.12	1.19	2.18	NA	0.33	NA	1.43	1.16	NA	NA	1.12	0.81	0.23	0.95	0.55	0.39	NA	NA	0.32	NA
P09497	209	CLTB	CLCB_HUMAN Clathrin light chain B OS=Homo sapiens OX=9606 GN=CLTB PE=1 SV=1	SSKQC(BTD[C])K|SSKQC(BTD[C])K	NA	NA	NA	NA	NA	NA	NA	NA	NA	NA	NA	NA	NA	NA	NA	NA	NA	NA	NA	NA	NA	NA	NA	NA	NA	NA	NA	NA	NA	NA	NA	NA	NA	NA	NA	NA	NA	NA	NA	NA	NA	NA	NA	NA	NA
P09525	198	ANXA4	ANXA4_HUMAN Annexin A4 OS=Homo sapiens OX=9606 GN=ANXA4 PE=1 SV=4	|FLTVLC(BTD[C])SR	NA	NA	0.88	0.52	NA	0.78	NA	0.51	1.22	NA	0.64	0.61	0.59	1.51	1.49	0.63	0.45	0.9	0.59	0.46	NA	1.62	NA	1	0.57	0.45	2.32	NA	NA	NA	NA	NA	1.46	NA	NA	NA	0.65	NA	NA	0.39	0.43	NA	NA	0.31	1.09
P09543	252	CNP	CN37_HUMAN 2',3'-cyclic-nucleotide 3'-phosphodiesterase OS=Homo sapiens OX=9606 GN=CNP PE=1 SV=2	RPPGVLHC(BTD[C])TTK|RPPGVLHC(BTD[C])TTK	NA	2.28	1.09	0.45	NA	1.54	NA	NA	1.06	NA	0.95	1.47	0.95	NA	NA	1.18	0.8	1.38	0.84	0.43	1.08	1.43	NA	1.02	1.07	1.23	2.82	0.24	NA	0.5	0.59	NA	NA	NA	NA	NA	NA	0.4	NA	0.4	0.33	NA	0.5	NA	0.48
P09543	158	CNP	CN37_HUMAN 2',3'-cyclic-nucleotide 3'-phosphodiesterase OS=Homo sapiens OX=9606 GN=CNP PE=1 SV=2	LDC(BTD[C])AQLK|	NA	NA	NA	NA	0.29	NA	0.78	0.45	NA	NA	NA	NA	NA	NA	NA	0.64	NA	NA	NA	NA	0.81	NA	NA	0.89	0.76	1	0.92	NA	3.03	NA	NA	NA	NA	0.82	NA	NA	NA	0.92	NA	NA	NA	0.93	NA	1.39	NA
P09543	257	CNP	CN37_HUMAN 2',3'-cyclic-nucleotide 3'-phosphodiesterase OS=Homo sapiens OX=9606 GN=CNP PE=1 SV=2	FC(BTD[C])DYGK|	NA	NA	NA	NA	NA	1.98	NA	NA	NA	NA	NA	NA	1.07	NA	NA	NA	NA	NA	NA	NA	NA	NA	NA	NA	1.17	NA	NA	NA	NA	NA	NA	NA	NA	NA	NA	NA	NA	NA	NA	NA	NA	NA	NA	NA	NA
P09564	209	CD7	CD7_HUMAN T-cell antigen CD7 OS=Homo sapiens OX=9606 GN=CD7 PE=1 SV=1	KLC(BTD[C])SWR|	NA	NA	NA	NA	NA	NA	NA	NA	NA	NA	NA	NA	NA	NA	1.18	NA	NA	NA	NA	NA	NA	NA	NA	NA	NA	NA	NA	NA	NA	NA	NA	NA	0.87	NA	1.04	NA	NA	NA	NA	NA	NA	NA	NA	NA	NA
P09622	69	DLD	DLDH_HUMAN Dihydrolipoyl dehydrogenase, mitochondrial OS=Homo sapiens OX=9606 GN=DLD PE=1 SV=2	TVC(BTD[C])IEK|TVC(BTD[C])IEK	0.42	NA	NA	0.35	NA	NA	NA	0.83	NA	0.56	NA	1	0.57	NA	1.79	0.62	0.49	NA	NA	NA	NA	NA	NA	NA	0.65	0.9	NA	0.14	NA	NA	NA	NA	NA	0.88	NA	NA	0.99	0.58	NA	0.53	0.2	0.39	0.4	0.52	0.65
P09622	484	DLD	DLDH_HUMAN Dihydrolipoyl dehydrogenase, mitochondrial OS=Homo sapiens OX=9606 GN=DLD PE=1 SV=2	VC(BTD[C])HAHPTLSEAFR|	NA	NA	NA	NA	NA	NA	NA	NA	0.77	NA	NA	NA	NA	NA	NA	NA	NA	NA	NA	NA	NA	1.43	NA	NA	NA	1.39	NA	NA	NA	NA	0.38	NA	NA	NA	NA	NA	NA	NA	NA	0.28	NA	NA	NA	0.73	NA
P09622	85	DLD	DLDH_HUMAN Dihydrolipoyl dehydrogenase, mitochondrial OS=Homo sapiens OX=9606 GN=DLD PE=1 SV=2	|NETLGGTCLNVGC(BTD[C])IPSK	NA	3.41	NA	0.81	NA	1.24	NA	NA	NA	NA	0.96	1.03	0.58	NA	NA	0.92	0.47	NA	0.73	0.46	0.65	NA	NA	0.88	0.8	0.63	NA	0.82	NA	NA	NA	NA	NA	NA	NA	NA	1.09	NA	1.16	NA	NA	0.39	0.33	NA	0.34
P09622	80	DLD	DLDH_HUMAN Dihydrolipoyl dehydrogenase, mitochondrial OS=Homo sapiens OX=9606 GN=DLD PE=1 SV=2	NETLGGTC(BTD[C])LNVGCIPSK|	NA	NA	NA	NA	NA	NA	NA	NA	NA	NA	NA	0.96	NA	NA	NA	NA	NA	NA	NA	NA	NA	NA	NA	NA	NA	NA	NA	NA	NA	NA	NA	NA	NA	NA	NA	NA	NA	NA	NA	NA	NA	NA	NA	NA	NA
P09651	175	HNRNPA1	ROA1_HUMAN Heterogeneous nuclear ribonucleoprotein A1 OS=Homo sapiens OX=9606 GN=HNRNPA1 PE=1 SV=5	YHTVNGHNC(BTD[C])EVR|	0.67	2.13	1.24	0.5	0.61	1.93	0.88	0.63	1.5	0.46	1.11	1.56	1.83	1.17	2.13	1.28	1.03	1.45	0.85	0.6	1.51	1.79	0.9	1.38	1.29	1.7	2.53	NA	2.28	0.28	0.22	1.6	NA	1.09	1.19	0.21	0.86	0.74	1.07	0.57	0.56	NA	NA	0.82	0.58
P09651	43	HNRNPA1	ROA1_HUMAN Heterogeneous nuclear ribonucleoprotein A1 OS=Homo sapiens OX=9606 GN=HNRNPA1 PE=1 SV=5	SHFEQWGTLTDC(BTD[C])VVMR|	NA	NA	NA	NA	NA	NA	NA	NA	NA	NA	NA	1.24	NA	NA	1.88	1.24	0.66	NA	NA	NA	1.09	0.67	NA	0.69	1.01	0.91	NA	0.53	NA	NA	NA	NA	NA	1.03	NA	NA	1.15	NA	NA	NA	NA	NA	NA	NA	0.79
P09758	145	TACSTD2	TACD2_HUMAN Tumor-associated calcium signal transducer 2 OS=Homo sapiens OX=9606 GN=TACSTD2 PE=1 SV=3	|GDLSLRC(BTD[C])DELVR	NA	NA	NA	NA	NA	NA	NA	NA	NA	NA	NA	NA	NA	NA	NA	NA	NA	NA	NA	NA	NA	NA	NA	NA	NA	NA	NA	NA	NA	NA	NA	NA	NA	NA	NA	NA	NA	NA	NA	NA	0.53	NA	NA	NA	NA
P09874	429	PARP1	PARP1_HUMAN Poly [ADP-ribose] polymerase 1 OS=Homo sapiens OX=9606 GN=PARP1 PE=1 SV=4	ASLC(BTD[C])ISTK|ASLC(BTD[C])ISTK	NA	2.94	0.78	0.46	0.29	NA	0.49	0.43	0.86	0.55	NA	0.94	1.12	NA	NA	NA	0.18	0.89	0.86	0.66	NA	2.45	NA	0.71	NA	0.7	1.23	NA	2.92	0.69	NA	NA	NA	NA	NA	NA	NA	NA	NA	NA	NA	NA	NA	NA	NA
P09874	24	PARP1	PARP1_HUMAN Poly [ADP-ribose] polymerase 1 OS=Homo sapiens OX=9606 GN=PARP1 PE=1 SV=4	KC(BTD[C])SESIPK|	0.39	2.14	0.77	NA	0.36	1.23	0.36	0.43	0.93	0.52	NA	0.96	NA	NA	1.11	1.03	0.66	0.85	0.88	0.43	0.94	1.95	NA	0.76	0.6	0.91	0.65	0.22	2.01	NA	0.88	NA	NA	0.92	1.04	1.01	0.64	0.37	NA	0.37	NA	0.46	NA	0.72	0.46
P09874	256	PARP1	PARP1_HUMAN Poly [ADP-ribose] polymerase 1 OS=Homo sapiens OX=9606 GN=PARP1 PE=1 SV=4	VC(BTD[C])STNDLK|VC(BTD[C])STNDLK	NA	2.86	0.79	0.51	0.57	1.53	1.02	NA	0.88	0.52	0.71	1.31	0.83	0.88	0.91	1.2	0.42	0.89	0.91	0.54	0.77	2.63	NA	0.82	0.64	0.69	2.15	0.53	3.66	1.14	1.19	1.36	1.5	NA	1.64	0.75	0.42	0.38	1	0.32	NA	0.78	0.33	NA	0.5
P09874	845	PARP1	PARP1_HUMAN Poly [ADP-ribose] polymerase 1 OS=Homo sapiens OX=9606 GN=PARP1 PE=1 SV=4	EGEC(BTD[C])QR|EGEC(BTD[C])QR	NA	NA	0.96	NA	NA	3.28	NA	NA	0.44	NA	NA	0.9	NA	1.08	0.77	1.09	0.71	1.08	NA	NA	1.04	2.84	NA	0.69	0.71	0.99	NA	7.25	NA	NA	NA	0.65	0.97	0.57	1.03	NA	0.81	1.1	0.88	1.29	1.03	1.07	2.04	1.06	0.98
P09884	141	POLA1	DPOLA_HUMAN DNA polymerase alpha catalytic subunit OS=Homo sapiens OX=9606 GN=POLA1 PE=1 SV=2	SMFIAC(BTD[C])AGK|	NA	NA	NA	NA	NA	NA	NA	NA	NA	NA	NA	NA	NA	NA	NA	NA	NA	NA	NA	NA	NA	NA	NA	NA	NA	NA	NA	NA	NA	NA	NA	NA	NA	NA	NA	NA	NA	NA	NA	NA	NA	NA	NA	NA	NA
P09913	160	IFIT2	IFIT2_HUMAN Interferon-induced protein with tetratricopeptide repeats 2 OS=Homo sapiens OX=9606 GN=IFIT2 PE=1 SV=1	|AKVC(BTD[C])FEK	NA	NA	NA	NA	NA	NA	NA	NA	NA	NA	NA	NA	NA	NA	NA	NA	NA	NA	NA	NA	NA	NA	NA	NA	NA	NA	NA	NA	NA	NA	NA	NA	NA	NA	NA	NA	NA	NA	NA	NA	NA	NA	NA	NA	NA
P09913	149	IFIT2	IFIT2_HUMAN Interferon-induced protein with tetratricopeptide repeats 2 OS=Homo sapiens OX=9606 GN=IFIT2 PE=1 SV=1	|LKC(BTD[C])GGNQNER	NA	NA	NA	NA	NA	NA	NA	NA	NA	NA	NA	NA	NA	NA	NA	NA	NA	NA	NA	NA	NA	NA	NA	NA	NA	NA	NA	NA	NA	NA	NA	NA	NA	NA	NA	0.55	NA	NA	NA	NA	NA	NA	NA	NA	NA
P09914	163	IFIT1	IFIT1_HUMAN Interferon-induced protein with tetratricopeptide repeats 1 OS=Homo sapiens OX=9606 GN=IFIT1 PE=1 SV=2	AKAC(BTD[C])FEK|	NA	NA	NA	NA	NA	NA	NA	NA	NA	NA	NA	NA	NA	NA	NA	NA	NA	NA	NA	NA	NA	NA	NA	NA	NA	NA	NA	NA	NA	NA	NA	NA	NA	NA	NA	NA	NA	NA	NA	NA	NA	NA	NA	NA	NA
P09936	132	UCHL1	UCHL1_HUMAN Ubiquitin carboxyl-terminal hydrolase isozyme L1 OS=Homo sapiens OX=9606 GN=UCHL1 PE=1 SV=2	AKC(BTD[C])FEK|	NA	2.29	0.71	NA	NA	NA	NA	NA	1.05	NA	NA	0.99	NA	NA	NA	0.84	0.45	0.86	NA	NA	0.54	NA	NA	0.79	0.65	0.97	NA	NA	NA	NA	NA	NA	NA	NA	NA	NA	NA	NA	NA	NA	NA	NA	NA	NA	NA
P09936	220	UCHL1	UCHL1_HUMAN Ubiquitin carboxyl-terminal hydrolase isozyme L1 OS=Homo sapiens OX=9606 GN=UCHL1 PE=1 SV=2	|FSAVALC(BTD[C])K	NA	1.57	NA	NA	NA	0.88	NA	NA	1.27	NA	NA	1.23	NA	NA	NA	0.85	0.69	NA	NA	NA	NA	NA	NA	NA	0.88	NA	NA	NA	NA	NA	NA	NA	NA	NA	NA	NA	NA	NA	NA	NA	NA	NA	NA	NA	NA
P09936	152	UCHL1	UCHL1_HUMAN Ubiquitin carboxyl-terminal hydrolase isozyme L1 OS=Homo sapiens OX=9606 GN=UCHL1 PE=1 SV=2	|NEAIQAAHDAVAQEGQC(BTD[C])R	NA	NA	1.02	NA	NA	NA	NA	NA	NA	NA	NA	NA	NA	NA	NA	NA	0.89	NA	NA	NA	0.7	2.21	NA	0.94	0.77	0.64	NA	NA	NA	NA	NA	NA	NA	NA	NA	NA	NA	NA	NA	NA	NA	NA	NA	NA	NA
P09936	90	UCHL1	UCHL1_HUMAN Ubiquitin carboxyl-terminal hydrolase isozyme L1 OS=Homo sapiens OX=9606 GN=UCHL1 PE=1 SV=2	QTIGNSC(BTD[C])GTIGLIHAVANNQDK|QTIGNSC(BTD[C])GTIGLIHAVANNQDK	NA	NA	NA	NA	NA	NA	NA	NA	NA	NA	NA	NA	NA	NA	NA	0.99	0.87	NA	NA	NA	0.63	NA	NA	0.86	0.87	NA	NA	NA	NA	NA	NA	NA	NA	NA	NA	NA	NA	NA	NA	NA	NA	NA	NA	NA	NA
P09960	147	LTA4H	LKHA4_HUMAN Leukotriene A-4 hydrolase OS=Homo sapiens OX=9606 GN=LTA4H PE=1 SV=2	AILPC(BTD[C])QDTPSVK|	0.52	NA	0.8	0.49	0.51	1.02	NA	0.59	NA	0.51	NA	NA	NA	NA	NA	0.85	NA	NA	0.83	NA	0.63	NA	0.64	0.81	0.76	0.95	NA	NA	NA	NA	NA	NA	0.9	NA	NA	NA	NA	NA	NA	NA	NA	NA	NA	NA	NA
P09960	543	LTA4H	LKHA4_HUMAN Leukotriene A-4 hydrolase OS=Homo sapiens OX=9606 GN=LTA4H PE=1 SV=2	LC(BTD[C])IQSK|	NA	NA	0.91	NA	0.53	2.28	NA	NA	NA	0.48	NA	NA	NA	NA	NA	1.16	0.55	1.16	NA	0.4	NA	NA	NA	NA	0.87	0.54	NA	0.71	NA	1.36	NA	NA	NA	NA	NA	NA	NA	0.81	NA	NA	0.58	1.88	NA	0.89	NA
P09960	8	LTA4H	LKHA4_HUMAN Leukotriene A-4 hydrolase OS=Homo sapiens OX=9606 GN=LTA4H PE=1 SV=2	PEIVDTC(BTD[C])SLASPASVCR|	NA	NA	NA	NA	NA	NA	NA	NA	NA	NA	NA	NA	NA	NA	NA	NA	NA	NA	NA	NA	NA	NA	NA	NA	NA	NA	NA	NA	NA	NA	NA	NA	NA	NA	NA	NA	NA	NA	NA	NA	NA	NA	NA	NA	NA
P09972	135	ALDOC	ALDOC_HUMAN Fructose-bisphosphate aldolase C OS=Homo sapiens OX=9606 GN=ALDOC PE=1 SV=2	|GVVPLAGTDGETTTQGLDGLSERC(BTD[C])AQYKK	NA	NA	NA	NA	NA	NA	NA	NA	NA	NA	NA	NA	NA	NA	NA	NA	NA	NA	NA	NA	NA	NA	NA	NA	NA	NA	NA	NA	NA	NA	NA	NA	NA	NA	NA	NA	NA	NA	NA	NA	NA	NA	NA	NA	NA
P0C7X3	335	CCNYL3	CCYL3_HUMAN Putative cyclin-Y-like protein 3 OS=Homo sapiens OX=9606 GN=CCNYL3 PE=3 SV=1	ISGTC(BTD[C])R|	NA	NA	NA	NA	NA	NA	NA	NA	5.37	NA	NA	NA	NA	NA	NA	NA	NA	NA	NA	NA	NA	NA	NA	NA	NA	NA	NA	NA	NA	NA	NA	NA	NA	NA	NA	NA	NA	NA	NA	NA	NA	NA	NA	NA	NA
P0CG39	880	POTEJ	POTEJ_HUMAN POTE ankyrin domain family member J OS=Homo sapiens OX=9606 GN=POTEJ PE=3 SV=1	LC(BTD[C])YVALDFEQEMAMVASSSSLEK|	NA	NA	NA	NA	NA	NA	NA	NA	NA	NA	NA	NA	NA	NA	NA	NA	NA	NA	NA	NA	NA	NA	NA	NA	0.93	NA	NA	NA	NA	NA	NA	NA	NA	NA	NA	NA	NA	NA	NA	NA	NA	NA	NA	NA	NA
P0DJG4	176	THEGL	THEGL_HUMAN Testicular haploid expressed gene protein-like OS=Homo sapiens OX=9606 GN=THEGL PE=2 SV=1	KC(BTD[C])FSSR|	NA	NA	NA	NA	NA	NA	NA	NA	NA	NA	NA	NA	NA	NA	NA	NA	NA	NA	NA	NA	NA	NA	NA	NA	NA	NA	NA	NA	NA	NA	NA	NA	NA	NA	NA	NA	NA	NA	NA	NA	NA	0.77	NA	NA	NA
P0DMV8	306	HSPA1A	HS71A_HUMAN Heat shock 70 kDa protein 1A OS=Homo sapiens OX=9606 GN=HSPA1A PE=1 SV=1	FEELC(BTD[C])SDLFR|	NA	NA	NA	NA	NA	NA	NA	NA	NA	NA	NA	NA	NA	NA	NA	NA	NA	NA	NA	NA	NA	NA	NA	NA	NA	NA	NA	NA	NA	NA	NA	NA	NA	NA	NA	NA	NA	NA	NA	NA	NA	NA	NA	1.01	NA
P0DPB5	37	POLR1D	RPC22_HUMAN Protein POLR1D, isoform 2 OS=Homo sapiens OX=9606 GN=POLR1D PE=1 SV=1	C(BTD[C])PLASTNK|	NA	NA	NA	NA	NA	NA	NA	NA	NA	NA	NA	NA	NA	NA	NA	NA	NA	NA	NA	NA	NA	NA	NA	NA	NA	NA	NA	NA	NA	NA	NA	NA	NA	NA	NA	NA	NA	NA	NA	NA	1.63	NA	NA	NA	NA
P0DPB6	68	POLR1D	RPAC2_HUMAN DNA-directed RNA polymerases I and III subunit RPAC2 OS=Homo sapiens OX=9606 GN=POLR1D PE=1 SV=1	|NPEVEFC(BTD[C])GYTTTHPSESK	NA	NA	NA	NA	NA	NA	NA	NA	NA	NA	NA	NA	NA	NA	NA	NA	NA	NA	NA	NA	NA	NA	NA	NA	NA	NA	NA	NA	NA	NA	NA	NA	NA	NA	NA	NA	NA	NA	NA	0.78	NA	NA	NA	NA	NA
P10109	155	FDX1	ADX_HUMAN Adrenodoxin, mitochondrial OS=Homo sapiens OX=9606 GN=FDX1 PE=1 SV=1	|LGCQIC(BTD[C])LTK	NA	NA	NA	NA	NA	NA	NA	NA	NA	NA	NA	NA	NA	NA	NA	NA	NA	NA	NA	NA	0.59	NA	NA	NA	NA	0.42	NA	NA	NA	NA	NA	NA	1.19	NA	NA	NA	NA	1.02	NA	NA	NA	NA	NA	NA	NA
P10109	152	FDX1	ADX_HUMAN Adrenodoxin, mitochondrial OS=Homo sapiens OX=9606 GN=FDX1 PE=1 SV=1	|LGC(BTD[C])QICLTK	NA	NA	NA	NA	NA	NA	NA	NA	NA	NA	NA	NA	NA	NA	NA	NA	NA	NA	NA	NA	NA	NA	NA	1.11	NA	NA	NA	NA	NA	NA	NA	NA	NA	NA	NA	NA	NA	NA	NA	NA	NA	NA	NA	NA	NA
P10145	61	CXCL8	IL8_HUMAN Interleukin-8 OS=Homo sapiens OX=9606 GN=CXCL8 PE=1 SV=1	VIESGPHC(BTD[C])ANTEIIVK|	NA	NA	NA	0.54	NA	NA	NA	NA	NA	NA	NA	NA	1.1	NA	NA	NA	NA	NA	NA	NA	NA	NA	NA	NA	NA	NA	NA	NA	0.31	NA	NA	NA	NA	NA	NA	NA	NA	NA	NA	NA	NA	NA	NA	NA	NA
P10155	119	RO60	RO60_HUMAN 60 kDa SS-A/Ro ribonucleoprotein OS=Homo sapiens OX=9606 GN=RO60 PE=1 SV=2	AVSEVC(BTD[C])R|	0.75	2.49	0.85	0.5	0.68	NA	0.98	0.74	1.13	NA	NA	1.67	1.09	NA	NA	1.17	0.57	NA	0.88	NA	1.2	NA	1.24	0.91	1.02	1.38	NA	NA	1.86	NA	0.08	NA	NA	NA	NA	0.08	0.7	NA	NA	NA	NA	NA	NA	NA	NA
P10155	71	RO60	RO60_HUMAN 60 kDa SS-A/Ro ribonucleoprotein OS=Homo sapiens OX=9606 GN=RO60 PE=1 SV=2	LIEDGRGC(BTD[C])EVIQEIK|	NA	NA	NA	NA	NA	NA	NA	0.7	NA	NA	NA	NA	NA	1.01	1.72	NA	NA	NA	0.85	NA	0.76	NA	NA	0.94	NA	NA	NA	NA	NA	0.3	0.54	NA	NA	1.06	NA	0.26	0.89	0.45	NA	0.58	0.68	NA	0.65	0.86	NA
P10316	283	HLA-A	1A69_HUMAN HLA class I histocompatibility antigen, A-69 alpha chain OS=Homo sapiens OX=9606 GN=HLA-A PE=1 SV=2	YTC(BTD[C])HVQHEGLPK|	0.7	NA	NA	NA	0.52	1.18	0.68	NA	1.06	1	NA	NA	NA	0.94	1.2	NA	NA	NA	NA	0.56	NA	NA	0.66	NA	NA	NA	NA	NA	NA	4.23	NA	NA	NA	NA	NA	2.33	0.63	NA	1.01	NA	NA	0.98	NA	NA	NA
P10316	363	HLA-A	1A69_HUMAN HLA class I histocompatibility antigen, A-69 alpha chain OS=Homo sapiens OX=9606 GN=HLA-A PE=1 SV=2	KGGSYSQAASSDSAQGSDVSLTAC(BTD[C])K|	1.83	NA	NA	NA	0.43	NA	1.04	0.76	NA	NA	NA	NA	NA	1.05	1.26	NA	NA	NA	NA	NA	NA	NA	0.78	NA	NA	NA	NA	10.59	NA	NA	1.1	NA	1.13	0.71	NA	0.58	0.87	1.11	1.11	0.64	0.72	0.78	0.93	1.02	0.91
P10398	538	ARAF	ARAF_HUMAN Serine/threonine-protein kinase A-Raf OS=Homo sapiens OX=9606 GN=ARAF PE=1 SV=2	|ISSNC(BTD[C])PK	0.34	NA	1.13	NA	NA	0.96	NA	0.33	NA	NA	NA	0.97	NA	0.88	NA	0.85	0.79	1.42	NA	NA	1.08	NA	NA	0.84	0.72	1.35	1.16	NA	NA	NA	NA	NA	1.21	NA	NA	0.52	0.83	NA	NA	NA	NA	NA	NA	NA	NA
P10515	488	DLAT	ODP2_HUMAN Dihydrolipoyllysine-residue acetyltransferase component of pyruvate dehydrogenase complex, mitochondrial OS=Homo sapiens OX=9606 GN=DLAT PE=1 SV=3	ASALAC(BTD[C])LK|ASALAC(BTD[C])LK	0.6	2.17	1.02	NA	NA	0.79	0.89	0.66	0.84	NA	NA	1.13	1.09	NA	NA	0.61	0.43	1.03	1.02	NA	0.89	1.88	0.95	1.08	0.78	0.8	1.43	NA	NA	NA	0.18	NA	NA	NA	NA	0.18	NA	NA	NA	NA	NA	NA	NA	NA	NA
P10515	143	DLAT	ODP2_HUMAN Dihydrolipoyllysine-residue acetyltransferase component of pyruvate dehydrogenase complex, mitochondrial OS=Homo sapiens OX=9606 GN=DLAT PE=1 SV=3	ATVGFESLEEC(BTD[C])YMAK|	NA	NA	NA	NA	NA	NA	NA	NA	NA	NA	NA	NA	NA	NA	NA	NA	NA	NA	NA	NA	NA	NA	NA	NA	NA	NA	NA	0.19	NA	NA	NA	NA	NA	NA	NA	NA	NA	NA	NA	NA	NA	NA	NA	NA	0.48
P10589	128	NR2F1	COT1_HUMAN COUP transcription factor 1 OS=Homo sapiens OX=9606 GN=NR2F1 PE=1 SV=1	NC(BTD[C])PIDQHHR|	NA	NA	NA	NA	NA	NA	NA	NA	0.96	NA	NA	NA	NA	NA	NA	NA	1.32	0.96	NA	NA	NA	1.89	NA	NA	1.05	NA	NA	NA	NA	NA	NA	NA	NA	NA	NA	NA	NA	NA	NA	NA	NA	NA	NA	NA	NA
P10589	321	NR2F1	COT1_HUMAN COUP transcription factor 1 OS=Homo sapiens OX=9606 GN=NR2F1 PE=1 SV=1	ALHVDSAEYSC(BTD[C])LK|	NA	NA	NA	NA	NA	1.4	NA	NA	NA	NA	NA	NA	NA	NA	NA	NA	NA	NA	NA	NA	NA	1.03	NA	1.32	NA	NA	NA	NA	NA	NA	NA	NA	NA	NA	NA	NA	NA	NA	NA	NA	NA	NA	NA	NA	NA
P10589	350	NR2F1	COT1_HUMAN COUP transcription factor 1 OS=Homo sapiens OX=9606 GN=NR2F1 PE=1 SV=1	SQC(BTD[C])ALEEYVR|	NA	NA	NA	NA	NA	NA	NA	NA	NA	NA	NA	NA	NA	NA	NA	1.24	NA	NA	NA	NA	NA	NA	NA	1.18	0.86	NA	NA	2.96	NA	NA	NA	NA	NA	NA	NA	NA	NA	NA	NA	NA	NA	NA	NA	NA	0.67
P10599	35	TXN	THIO_HUMAN Thioredoxin OS=Homo sapiens OX=9606 GN=TXN PE=1 SV=3	SATWCGPC(BTD[C])K|	NA	NA	NA	NA	NA	NA	NA	NA	NA	NA	NA	NA	1.08	NA	NA	NA	NA	NA	NA	NA	NA	NA	NA	NA	NA	NA	NA	NA	NA	NA	NA	NA	NA	NA	NA	NA	NA	NA	NA	NA	NA	NA	NA	NA	NA
P10599	73	TXN	THIO_HUMAN Thioredoxin OS=Homo sapiens OX=9606 GN=TXN PE=1 SV=3	|C(BTD[C])MPTFQFFK	NA	NA	NA	NA	NA	NA	NA	NA	NA	NA	NA	NA	NA	NA	NA	NA	NA	NA	NA	NA	NA	NA	NA	NA	NA	NA	NA	NA	NA	NA	NA	NA	NA	NA	NA	NA	NA	NA	NA	NA	NA	NA	NA	0.94	0.99
P10606	116	COX5B	COX5B_HUMAN Cytochrome c oxidase subunit 5B, mitochondrial OS=Homo sapiens OX=9606 GN=COX5B PE=1 SV=2	C(BTD[C])GAHYK|	0.68	2.51	NA	0.5	0.75	1.48	1.09	NA	1.4	NA	1.74	1.37	NA	NA	NA	0.81	1.48	0.72	1.24	NA	1.09	1.98	1.09	1.08	1.11	0.98	NA	1.7	NA	NA	NA	NA	NA	NA	NA	NA	NA	0.25	NA	0.36	0.34	0.81	0.42	0.69	NA
P10606	113	COX5B	COX5B_HUMAN Cytochrome c oxidase subunit 5B, mitochondrial OS=Homo sapiens OX=9606 GN=COX5B PE=1 SV=2	GEAQRC(BTD[C])PR|	0.17	3.31	0.58	NA	0.33	1.21	NA	NA	0.74	NA	0.88	0.66	NA	NA	NA	0.8	0.53	0.62	NA	NA	0.51	2.45	NA	0.74	0.44	0.69	1.39	NA	NA	1.01	NA	NA	NA	1.11	1.84	NA	NA	NA	NA	NA	NA	NA	NA	NA	NA
P10620	50	MGST1	MGST1_HUMAN Microsomal glutathione S-transferase 1 OS=Homo sapiens OX=9606 GN=MGST1 PE=1 SV=1	KVFANPEDC(BTD[C])VAFGK VFANPEDC(BTD[C])VAFGK|	0.87	2.14	1.05	0.49	0.63	1.15	0.92	0.61	1.1	0.8	0.76	0.79	0.84	0.89	1.08	1	0.99	1.02	0.72	0.45	0.88	1.41	0.74	0.72	0.83	0.91	1.57	6.18	1.16	1.15	NA	1.9	1.23	0.75	1.3	0.96	1.06	0.83	0.95	0.46	NA	0.53	2.22	0.55	0.59
P10644	18	PRKAR1A	KAP0_HUMAN cAMP-dependent protein kinase type I-alpha regulatory subunit OS=Homo sapiens OX=9606 GN=PRKAR1A PE=1 SV=1	|SLREC(BTD[C])ELYVQK	NA	1.59	NA	NA	NA	NA	NA	NA	NA	NA	NA	0.99	NA	NA	NA	0.92	NA	NA	NA	NA	1.27	NA	NA	1.02	0.69	NA	NA	NA	2.61	NA	NA	NA	NA	NA	0.55	NA	NA	0.66	0.54	NA	NA	NA	NA	0.94	NA
P10644	347	PRKAR1A	KAP0_HUMAN cAMP-dependent protein kinase type I-alpha regulatory subunit OS=Homo sapiens OX=9606 GN=PRKAR1A PE=1 SV=1	GPLKC(BTD[C])VK|GPLKC(BTD[C])VK	0.22	2.17	0.45	0.65	0.3	1.09	NA	NA	0.83	NA	0.71	0.87	NA	NA	NA	0.8	0.59	0.8	NA	NA	0.78	2.76	0.39	0.57	0.61	0.71	1.04	3.66	4.99	0.76	NA	NA	NA	0.97	NA	0.41	0.83	0.98	0.88	0.55	NA	0.69	NA	0.78	0.99
P10644	39	PRKAR1A	KAP0_HUMAN cAMP-dependent protein kinase type I-alpha regulatory subunit OS=Homo sapiens OX=9606 GN=PRKAR1A PE=1 SV=1	DSIVQLC(BTD[C])TARPER|	NA	NA	NA	NA	NA	NA	NA	NA	1.04	NA	NA	NA	NA	NA	NA	1.15	0.57	1.6	NA	NA	1.17	NA	NA	NA	0.67	NA	NA	NA	NA	NA	NA	NA	NA	NA	NA	NA	NA	NA	NA	NA	NA	NA	NA	NA	NA
P10644	362	PRKAR1A	KAP0_HUMAN cAMP-dependent protein kinase type I-alpha regulatory subunit OS=Homo sapiens OX=9606 GN=PRKAR1A PE=1 SV=1	|VLGPC(BTD[C])SDILK	0.64	1.71	NA	0.42	NA	1.01	NA	0.54	1.04	NA	NA	0.99	1.54	NA	NA	0.92	0.67	0.93	NA	NA	1	1.99	NA	0.85	0.78	NA	NA	NA	NA	1.67	NA	NA	NA	NA	NA	0.24	NA	NA	NA	NA	NA	NA	NA	NA	NA
P10768	11	ESD	ESTD_HUMAN S-formylglutathione hydrolase OS=Homo sapiens OX=9606 GN=ESD PE=1 SV=2	C(BTD[C])FGGLQK|	0.74	NA	NA	NA	NA	NA	NA	NA	NA	0.72	NA	1.33	NA	NA	NA	1.04	0.96	NA	NA	NA	NA	NA	NA	NA	NA	1.09	NA	4.55	NA	0.71	0.69	NA	NA	NA	NA	NA	NA	0.83	NA	0.72	0.89	NA	NA	NA	0.58
P10768	28	ESD	ESTD_HUMAN S-formylglutathione hydrolase OS=Homo sapiens OX=9606 GN=ESD PE=1 SV=2	VFEHDSVELNC(BTD[C])K|VFEHDSVELNC(BTD[C])K	NA	1.96	NA	0.56	NA	2.01	NA	NA	NA	NA	0.98	2.15	0.67	NA	2.21	1.28	1.04	0.95	NA	0.47	1.46	1.85	NA	1.35	NA	1.62	NA	NA	NA	NA	NA	NA	1.29	NA	NA	NA	0.57	0.82	NA	0.51	NA	NA	NA	NA	NA
P10809	237	HSPD1	CH60_HUMAN 60 kDa heat shock protein, mitochondrial OS=Homo sapiens OX=9606 GN=HSPD1 PE=1 SV=2	GQKC(BTD[C])EFQDAYVLLSEK|	NA	2.56	1.3	0.42	1.07	NA	NA	0.86	1.19	0.66	0.8	1.16	0.83	0.92	0.96	1.47	0.93	1.48	0.56	0.38	1.45	1.45	0.79	0.77	1.21	1.28	1.95	0.82	2.33	NA	0.93	1.24	NA	0.77	1.14	0.81	0.94	0.66	NA	0.67	0.56	0.65	1.13	0.67	0.68
P10809	447	HSPD1	CH60_HUMAN 60 kDa heat shock protein, mitochondrial OS=Homo sapiens OX=9606 GN=HSPD1 PE=1 SV=2	C(BTD[C])IPALDSLTPANEDQK|	NA	NA	NA	NA	0.74	NA	NA	1.01	NA	NA	NA	NA	NA	NA	NA	NA	NA	NA	NA	NA	NA	NA	NA	NA	NA	NA	NA	NA	NA	NA	NA	NA	NA	NA	NA	NA	NA	NA	NA	NA	NA	NA	NA	NA	0.39
P10809	442	HSPD1	CH60_HUMAN 60 kDa heat shock protein, mitochondrial OS=Homo sapiens OX=9606 GN=HSPD1 PE=1 SV=2	AAVEEGIVLGGGC(BTD[C])ALLR|	0.79	NA	NA	NA	NA	NA	0.88	NA	NA	NA	NA	NA	NA	NA	NA	NA	NA	NA	NA	NA	1	NA	0.8	0.82	1.04	NA	NA	NA	NA	NA	NA	NA	NA	NA	NA	NA	NA	1.53	NA	1.01	1.39	0.81	2.65	1.23	1.14
P11021	41	HSPA5	BIP_HUMAN Endoplasmic reticulum chaperone BiP OS=Homo sapiens OX=9606 GN=HSPA5 PE=1 SV=2	SC(BTD[C])VGVFK|	NA	NA	NA	NA	NA	NA	NA	NA	NA	NA	NA	NA	NA	NA	NA	NA	NA	NA	NA	NA	NA	NA	NA	NA	NA	NA	NA	NA	NA	NA	NA	NA	NA	NA	NA	NA	NA	0.51	NA	0.99	NA	NA	0.8	0.82	0.55
P11047	1600	LAMC1	LAMC1_HUMAN Laminin subunit gamma-1 OS=Homo sapiens OX=9606 GN=LAMC1 PE=1 SV=3	|TLPSGC(BTD[C])FNTPSIEKP	NA	NA	NA	NA	NA	NA	NA	NA	NA	NA	NA	NA	NA	NA	NA	NA	NA	NA	NA	NA	NA	NA	NA	NA	NA	NA	NA	NA	NA	NA	NA	NA	NA	NA	NA	NA	NA	NA	NA	NA	NA	NA	NA	NA	NA
P11117	159	ACP2	PPAL_HUMAN Lysosomal acid phosphatase OS=Homo sapiens OX=9606 GN=ACP2 PE=1 SV=3	FPLGPC(BTD[C])PR|	NA	NA	NA	NA	1.46	NA	NA	NA	NA	NA	NA	NA	NA	NA	NA	NA	NA	NA	NA	NA	NA	NA	NA	NA	NA	NA	NA	NA	1.37	NA	NA	2.87	1.28	0.75	NA	NA	1.3	1.38	NA	0.53	NA	NA	NA	0.26	NA
P11142	17	HSPA8	HSP7C_HUMAN Heat shock cognate 71 kDa protein OS=Homo sapiens OX=9606 GN=HSPA8 PE=1 SV=1	|SC(BTD[C])VGVFQHGK C(BTD[C])VGVFQHGK	0.65	1.51	1.27	NA	NA	1.11	0.85	0.76	1.45	0.66	NA	NA	NA	0.94	0.78	NA	0.77	1.12	0.86	NA	1.09	1.26	NA	1.04	0.99	NA	NA	1.23	NA	NA	NA	1.73	0.99	1.02	NA	NA	NA	NA	0.91	0.53	0.8	0.94	0.67	NA	0.83
P11142	603	HSPA8	HSP7C_HUMAN Heat shock cognate 71 kDa protein OS=Homo sapiens OX=9606 GN=HSPA8 PE=1 SV=1	ELEKVC(BTD[C])NPIITK VC(BTD[C])NPIITK|VC(BTD[C])NPIITK	0.78	2.01	1.05	0.41	0.7	1.45	1.14	0.99	1.15	0.49	1.28	1.4	0.8	1.32	1.29	0.99	0.54	0.93	0.85	0.44	1.07	1.73	1.16	0.87	0.9	1.06	2.94	0.07	1.68	NA	0.06	2.11	1.01	1.2	1.61	NA	1.19	0.38	0.98	0.28	NA	0.38	0.42	0.49	0.32
P11142	574	HSPA8	HSP7C_HUMAN Heat shock cognate 71 kDa protein OS=Homo sapiens OX=9606 GN=HSPA8 PE=1 SV=1	ILDKC(BTD[C])NEIINWLDK|	NA	NA	NA	NA	NA	NA	NA	NA	NA	NA	NA	NA	NA	NA	NA	NA	0.54	NA	NA	NA	1.32	NA	NA	1.05	1.02	1.27	NA	0.04	NA	NA	NA	NA	NA	NA	NA	NA	NA	0.3	NA	0.16	0.15	0.24	0.17	NA	0.28
P11142	267	HSPA8	HSP7C_HUMAN Heat shock cognate 71 kDa protein OS=Homo sapiens OX=9606 GN=HSPA8 PE=1 SV=1	LRTAC(BTD[C])ER|	NA	NA	NA	NA	NA	NA	NA	NA	NA	NA	NA	NA	NA	NA	NA	NA	NA	NA	NA	NA	NA	NA	NA	NA	NA	NA	NA	NA	NA	NA	NA	NA	NA	NA	NA	0.68	NA	NA	NA	NA	NA	NA	NA	NA	NA
P11172	174	UMPS	UMPS_HUMAN Uridine 5'-monophosphate synthase OS=Homo sapiens OX=9606 GN=UMPS PE=1 SV=1	LHSVC(BTD[C])TLSK|	0.85	2.19	0.98	0.88	0.51	1.34	0.8	0.6	1.22	0.68	NA	1.05	0.83	1.28	NA	0.97	1.03	1.13	NA	NA	1.05	2.09	0.71	1.1	0.93	1.32	2.02	NA	NA	NA	NA	NA	NA	1.29	1.59	0.29	0.98	NA	1.34	NA	NA	0.69	NA	NA	NA
P11172	255	UMPS	UMPS_HUMAN Uridine 5'-monophosphate synthase OS=Homo sapiens OX=9606 GN=UMPS PE=1 SV=1	ETNLC(BTD[C])LSADVSLAR|	NA	NA	NA	NA	NA	NA	NA	NA	NA	NA	NA	NA	NA	NA	NA	NA	NA	NA	NA	NA	NA	NA	NA	NA	NA	NA	NA	NA	NA	NA	NA	NA	NA	NA	NA	NA	NA	NA	NA	NA	NA	NA	NA	NA	NA
P11172	304	UMPS	UMPS_HUMAN Uridine 5'-monophosphate synthase OS=Homo sapiens OX=9606 GN=UMPS PE=1 SV=1	C(BTD[C])HEFLIFEDR|	NA	NA	NA	NA	NA	NA	NA	NA	NA	NA	NA	NA	NA	NA	NA	NA	NA	NA	NA	NA	NA	NA	NA	NA	NA	NA	NA	NA	NA	NA	NA	NA	NA	NA	NA	NA	NA	NA	NA	NA	NA	NA	NA	NA	NA
P11177	249	PDHB	ODPB_HUMAN Pyruvate dehydrogenase E1 component subunit beta, mitochondrial OS=Homo sapiens OX=9606 GN=PDHB PE=1 SV=3	PVGHC(BTD[C])LEAAAVLSK|PVGHC(BTD[C])LEAAAVLSK	NA	1.63	1.39	NA	NA	1.49	NA	NA	NA	NA	1.06	1.58	NA	0.89	NA	1.13	0.73	NA	0.72	NA	1.21	1.48	NA	1.27	0.95	1.27	3.18	0.96	NA	NA	NA	1.89	0.85	0.72	1.19	NA	0.98	NA	NA	0.55	NA	0.65	0.76	0.77	0.6
P11177	263	PDHB	ODPB_HUMAN Pyruvate dehydrogenase E1 component subunit beta, mitochondrial OS=Homo sapiens OX=9606 GN=PDHB PE=1 SV=3	EGVEC(BTD[C])EVINMR|	NA	2.06	NA	NA	NA	NA	NA	NA	NA	NA	NA	0.89	NA	NA	NA	1.17	NA	NA	NA	NA	NA	NA	NA	NA	0.97	1	NA	NA	NA	NA	NA	NA	NA	NA	NA	NA	NA	NA	NA	NA	NA	NA	NA	NA	NA
[truncated: 6,846 more rows]
[truncated: 20 more columns]
